# Supplementary material for: Clonal evolution in relapsed acute myeloid leukaemia revealed by whole-genome sequencing
Source: Springer Nature journal article supplement (doi:10.1038/nature10738), 2012-01-01
Supplement: 41586_2012_BFnature10738_MOESM259_ESM.pdf [file 41586_2012_BFnature10738_MOESM259_ESM.pdf]

## Clonal evolution in relapsed acute myeloid leukemia revealed by whole genome sequencing

Li Ding<sup>\*1,2</sup>, Timothy J. Ley<sup>\*1,3,4</sup>, David E. Larson<sup>1</sup>, Christopher A. Miller<sup>1</sup>, Daniel C. Koboldt<sup>1</sup>, John S. Welch<sup>3</sup>, Julie K. Ritchey<sup>3</sup>, Margaret A. Young<sup>3</sup>, Tamara Lamprecht<sup>3</sup>, Michael D. McLellan<sup>1</sup>, Joshua F. McMichael<sup>1</sup>, John W. Wallis<sup>1,2</sup>, Charles Lu<sup>1</sup>, Dong Shen<sup>1</sup>, Christopher C. Harris<sup>1</sup>, David J. Dooling<sup>1,2</sup>, Robert S. Fulton<sup>1,2</sup>, Lucinda L. Fulton<sup>1,2</sup>, Ken Chen<sup>1,2</sup>, Heather Schmidt<sup>1</sup>, Joelle Kalicki-Veizer<sup>1</sup>, Vincent J. Magrini<sup>1,2</sup>, Lisa Cook<sup>1</sup>, Sean D. McGrath<sup>1</sup>, Tammi L. Vickery<sup>1</sup>, Michael C. Wendl<sup>1,2</sup>, Sharon Heath<sup>3</sup>, Mark A. Watson<sup>6</sup>, Daniel C. Link<sup>3,4</sup>, Michael H. Tomasson<sup>3,4</sup>, William D. Shannon<sup>5</sup>, Jacqueline E. Payton<sup>6</sup>, Shashikant Kulkarni<sup>2,4,6</sup>, Peter Westervelt<sup>3,4</sup>, Matthew J. Walter<sup>3,4</sup>, Timothy A. Graubert<sup>3,4</sup>, Elaine R. Mardis<sup>1,2,4</sup>, Richard K. Wilson<sup>1,2,4</sup>, John F. DiPersio<sup>3,4</sup>

### Institutional Affiliations

<sup>1</sup>The Genome Institute, Washington University, St. Louis, MO, USA

<sup>2</sup>Department of Genetics, Washington University, St. Louis, MO, USA

<sup>3</sup>Department of Internal Medicine, Division of Oncology, Washington University, St. Louis, MO, USA

<sup>4</sup>Siteman Cancer Center, Washington University, St. Louis, MO, USA

<sup>5</sup>Division of Biostatistics, Washington University, St. Louis, MO, USA

<sup>6</sup>Department of Pathology and Immunology, Washington University, St. Louis, MO, USA

\*these authors contributed equally.

Corresponding Author:

Timothy J. Ley, MD

Washington University School of Medicine

Division of Oncology, Stem Cell Biology Section

Campus Box 8007

660 South Euclid Avenue

St. Louis, MO 63110 USA

email: [timley@wustl.edu](mailto:timley@wustl.edu)

## Table of Contents

A. Supplementary Materials and Methods (pp 3-28)

B. Supplementary Figures and Legends (pp 29-48)

C. Supplementary Tables (pp 49-189)

D. Supplementary References (pp 190-191)

## **Supplementary Materials and Methods**

## Clinical reports for the 8 AML cases in this study

### UPN 933124

A previously healthy Caucasian female in her late 50s presented with a sudden onset of sore throat and easy bruising. The patient's family history was positive for late onset cancers in her mother and several of her mother's siblings, including a maternal uncle with a reported case of AML that was confirmed by death certificate. The patient's sister has Essential Thrombocythemia (*JAK2 V617F* negative). The patient was found to have a peripheral blood white blood cell count of 105,000 cells/ mcl with 85% blasts on presentation. The hemoglobin was 12.1 gm/dl, and platelet count was 20,000/mcl. A bone marrow biopsy and aspirate revealed 100% blasts, and confirmed the diagnosis of AML, FAB M1 subtype. Flow cytometry revealed a single population of myeloblasts with cell surface expression of CD-13, -33 and -117, and absent expression of CD-34 and HLA-DR. Cytogenetic analysis of tumor cells revealed a normal 46 XX karyotype. After informed consent was obtained, she was enrolled in a cooperative group protocol for treatment of AML in adults less than age 60 (Cancer and Leukemia Group B (CALGB) #19808). After emergent leukopheresis, she underwent induction chemotherapy with cytarabine, daunorubicin, and etoposide. A bone marrow biopsy repeated 2 weeks later demonstrated ablation. After myeloid recovery, a repeat bone marrow biopsy demonstrated first complete remission. On the basis of her intermediate risk cytogenetics, she was assigned to undergo consolidation chemotherapy with high dose cytarabine and etoposide, followed by filgrastim to facilitate autologous hematopoietic stem cell mobilization and collection. She subsequently underwent dose- intensive busulfan and etoposide conditioning, followed by autologous hematopoietic stem cell rescue. Upon recovery from autologous stem cell transplantation, she was assigned to receive maintenance immunotherapy with IL-2. Despite these multiple therapies, she relapsed 11 months after her initial diagnosis. After failing to respond to a salvage regimen of mitoxantrone, etoposide, and cytarabine, she received fludarabine, high dose Ara-C, idarubicin and gemtuzumab ozogamicin. 10 days later she received high dose cyclophosphamide conditioning (60 mg/kg daily x 2) and then single dose total body irradiation (550 cGy; 30 cGy/min) followed by allogeneic hematopoietic stem cell transplantation from an HLA-matched sibling donor. A bone marrow biopsy performed one month after transplantation confirmed second complete remission. Her disease relapsed four months later. Gemtuzumab ozogamicin was again administered, followed by two donor lymphocyte infusions, without clearance of circulating blasts. She was then successively treated with azacytidine, low dose cytarabine, and decitabine, again without appreciable response, and expired 24 months after her initial diagnosis.

### UPN 400220

A 34 year old Caucasian female with a prior history of cervical carcinoma in situ (treated with LEEP procedure), mitral valve prolapse, and endometriosis, presented with fatigue, allergy symptoms and chest pain. A CBC demonstrated WBC 14,500 cells/mcl, hemoglobin 11.5 g/dl, platelets 139,000 cells/mcl, with 58% circulating blasts. A bone marrow biopsy demonstrated 90% cellularity, with 71% myeloblasts (MPX +, NSE -, CD13/33/34/117/HLA-DR+), consistent with a diagnosis of AML M4. Cytogenetics showed a 46 XX karyotype.

Molecular diagnostic studies demonstrated a *FLT3* internal tandem duplication. Initial therapy consisted of 7 + 3 induction regimen with infusional cytarabine and idarubicin. A mid-cycle bone marrow biopsy revealed ablation, and a subsequent biopsy documented first complete remission. Post-remission therapy consisted of 3 cycles of high dose cytarabine. Relapse was documented 8 months after initial diagnosis. The patient underwent salvage chemotherapy with mitoxantrone, etoposide, and high dose cytarabine (MEC) with concurrent plerixafor, but did not achieve remission. She was subsequently treated with fludarabine, high dose cytarabine, idarubicin, and gemtuzumab with concurrent filgrastim, and subsequently underwent matched unrelated donor stem cell transplantation with active disease. She expired at day +7 post transplant, 10 months from initial diagnosis.

#### UPN 426980

A 69 year old Caucasian male, with a prior history of hypothyroidism, hyperlipidemia, and pneumonia, presented with low grade fever and cough. A CBC demonstrated WBC 6000 cells/mcl, hemoglobin 7.4 g/dl, platelets 102,000 cells/mcl, with 29% circulating blasts. A bone marrow biopsy demonstrated 50% cellularity, with 64% myeloblasts (MPX +, NSE -, CD13/33/117+), consistent with a diagnosis of AML M2. Cytogenetics showed a 46 XY karyotype. Initial therapy consisted of 7 + 3 induction with infusional cytarabine, daunorubicin, and concurrent oblimersen (Genasense, a *BCL2* antisense molecule). A mid-cycle bone marrow biopsy revealed ablation, and a subsequent biopsy documented first complete remission. Post-remission therapy consisted of 2 cycles of high dose cytarabine with concurrent oblimersen. Relapse was documented 26 months from diagnosis. Salvage chemotherapy regimens were administered sequentially with no or minimal response including decitabine, high dose cytarabine, mitoxantrone and etoposide, azacytidine, and palliative hydroxyurea. He expired from progressive disease 48 months following his initial diagnosis.

#### UPN 452198

A 55 year old Caucasian male, previously healthy, presented with fatigue, subjective fevers, and sinus congestion. A CBC demonstrated: WBC 72,600 cells/mcl, hemoglobin 8.2 g/dl, platelets 17,000 cells/mcl, with 8% circulating blasts and 50% monocytes. A bone marrow biopsy was inevaluable for cellularity. The aspirate demonstrated 97 % monoblasts (MPX -, NSE +, CD13/33/64+), consistent with a diagnosis of AML M5. Cytogenetics showed a 46 XY karyotype. Initial therapy consisted of hydroxyurea for two days, followed by 7 + 3 induction with infusional cytarabine and idarubicin. A mid-cycle bone marrow biopsy revealed ablation, and a subsequent biopsy documented first complete remission. Post-remission therapy consisted of 4 cycles of high dose cytarabine. Relapse was documented 16 months from diagnosis, and treated with mitoxantrone, etoposide, and high dose cytarabine (MEC) with concurrent plerixafor; the patient achieved a second complete remission. He underwent matched sibling donor stem cell transplantation following busulfan/cyclophosphamide conditioning, and remains alive and in complete remission 56 months from initial diagnosis.

#### UPN 573988

A 67 year old Caucasian female with a prior history of hyperthyroidism (treated with radioactive iodine), hypertension, pancreatitis, and breast intraductal carcinoma in situ (treated with excision), presented with syncope. A CBC demonstrated WBC 15,200 cells/mcl, hemoglobin 8.2 g/dl, platelets 79 cells/mcl, with 10% circulating blasts and 30% monocytes. A bone marrow biopsy demonstrated hypercellularity, with 17% myeloblasts an (MPX +, NSE -, CD13/33/117+), and 58 % monoblasts (MPX -, NSE +, CD13/33/64+) consistent with a diagnosis of AML M4. Cerebrospinal fluid was negative for malignant cells. Cytogenetics showed a 46 XX karyotype. Initial therapy consisted of 7 + 3 induction with infusional cytarabine and idarubicin. A mid-cycle bone marrow biopsy revealed ablation, and a subsequent biopsy following marrow recovery documented first complete remission. Post-remission therapy consisted of a single cycle of 5 + 2 infusional cytarabine and idarubicin. Relapse (skin and bone marrow) was documented 12 months from diagnosis and was treated with decitabine without response. She expired from progressive disease 20 months from initial diagnosis.

#### UPN 869586

A previously healthy 23 year old Caucasian male presented with abdominal pain and was found to have a ruptured appendix. A CBC demonstrated WBC 27,100 cells/mcl, hemoglobin 12.0 g/dl, platelets 23,000 cells/mcl, with 63% circulating blasts. A bone marrow biopsy demonstrated was inevaluable for cellularity. The aspirate demonstrated 51% myeloblasts (sparse MPX+, NSE low, CD13/33/34/56/117+), consistent with a diagnosis of AML M4. Cytogenetics showed a 46 XY karyotype. Initial therapy consisted of 7 + 3 + 3 induction with infusional cytarabine, daunorubicin, and etoposide. A mid-cycle bone marrow biopsy was ablated, and a subsequent biopsy following marrow recovery documented first complete remission. Post-remission therapy consisted of high dose cytarabine and etoposide, followed by autologous stem cell transplantation with busulfan/cyclophosphamide conditioning. Relapse was documented seven months from diagnosis, and treated with fludarabine, high dose cytarabine, idarubicin, and gemtuzumab with concurrent filgrastim, resulting in second complete remission. He subsequently underwent matched sibling donor allogeneic stem cell transplant 12 months from initial diagnosis, but relapsed two months later. Subsequent treatment included: clofarabine and high dose cytarabine; decitabine; and cladribine, high dose cytarabine, and imatinib, as well as serial donor lymphocyte infusions, without achieving remission. He expired from progressive disease 19 months from initial diagnosis.

#### UPN 758168

A previously healthy 25 year old Caucasian female presented with fatigue, nausea, vomiting, and decreased visual acuity in her left eye. A CBC demonstrated WBC 3,500 cells/mcl, hemoglobin 5.9 g/dl, platelets 24,000 cells/mcl, with circulating promyelocytes. Diffuse intravascular coagulation (DIC) was present (INR of 3.2 and fibrinogen 88 mg/dl). A bone marrow biopsy demonstrated hypercellularity, with 93% promyelocytes (MPX +, NSE -, CD13/33+), consistent with a diagnosis of AML M3. Cytogenetics showed a t(15;17) translocation. Ophthalmologic evaluation demonstrated retinal hemorrhage, detachment, and acute glaucoma, resulting in

irreversible loss of vision and eventual enucleation. Initial therapy consisted of 7 + 3 induction with infusional cytarabine, idarubicin, and concurrent ATRA, complicated by headaches attributed to pseudotumor cerebri (CSF negative for malignancy). A bone marrow biopsy following marrow recovery documented first complete remission. Following induction, additional ATRA was withheld because it was presumed to be the cause of her pseudotumor cerebri. Post-remission therapy consisted of 3 cycles of “anthracycline” administered by the referring oncologist, followed by planned arsenic trioxide maintenance (prematurely aborted due to non-compliance). Relapse was documented 32 months from diagnosis, and was treated with arsenic trioxide, resulting in second complete remission. She subsequently underwent matched unrelated donor stem cell transplantation 4 months later, complicated by acute and chronic graft vs host disease and recurrent infection. She expired while in remission 50 months from initial diagnosis (14 months post transplant) from infectious complications of her transplant.

#### UPN 804168

A 53 year old Caucasian male with a history of hyperlipidemia, hypertension, and coronary artery disease (treated with stent), presented with a syncopal episode. A CBC demonstrated WBC 88,100 cells/mcl, hemoglobin 8.8 g/dl, platelets 30,000 cells/mcl, with 52% circulating blasts. A bone marrow biopsy demonstrated >90% cellularity, with 86% myeloblasts (MPX+, NSE -, CD13/33/117+), consistent with a diagnosis of AML M1. Cytogenetics showed a 46 XY karyotype. Initial therapy consisted of 7 + 3 + 3 induction with infusional cytarabine, daunorubicin, and etoposide. A mid-cycle bone marrow biopsy revealed ablation, and a subsequent biopsy following marrow recovery documented first complete remission. Post-remission therapy consisted of 2 cycles of high dose cytarabine. Relapse was documented 8 months from diagnosis, and was treated with mitoxantrone, etoposide, and high dose cytarabine with concurrent plerixafor, following which residual disease was documented (5-7% blasts). He subsequently underwent matched sibling donor allogeneic stem cell transplant following conditioning with single dose total body irradiation and high dose cyclophosphamide, but relapsed 1 month post transplant. Subsequent salvage therapy included decitabine, which yielded a third remission. He subsequently developed extramedullary relapse that was treated with radiation, and died of progressive disease 30 months from initial diagnosis.

#### **Illumina library construction and sequencing**

We followed the procedure described by Mardis *et al*<sup>1</sup> for library construction and sequencing. We used Illumina DNA sequencing to generate 98.6, 102.8, and 116.4 billion base pairs of sequence data for the skin, primary tumor, and relapse samples from UPN 933124, respectively, with corresponding haploid coverages of 26.2X, 28.1X, and 34.2X (Supplementary Table 1). Comparison of SNVs detected in the whole genome sequencing data with SNPs genotyped using arrays confirmed bi-allelic detection of 99.41%, 99.46%, and

99.62% of the heterozygous array SNPs in the skin, primary tumor, and relapse sequence datasets, respectively. Detailed coverages for all 8 AML cases are included in Supplementary Table 1.

### **Mutation detection pipeline**

We aligned all reads using BWA 0.5.5<sup>2</sup> by lane, merged all lanes and deduplicated using Picard 1.07 (<http://picard.sourceforge.net>) and then called variants using Samtools (svn rev 454)<sup>3</sup>. We detected somatic single nucleotide variants as described before<sup>4</sup>, but using a program that directly accesses a bam file called SomaticSniper (Larson *et al.* manuscript in revision). We defined high quality somatic predictions as those sites with a somatic score greater than 40 and an average mapping quality greater than 40. This is a slight modification of our previous categorization, which required a minimum average mapping quality of 70, since we had aligned our reads using BWA and BWA calculates its mapping qualities differently than MAQ.

Indels in all 8 primary tumors and the relapse tumor from UPN 933124 were called using a modified version of Samtools to identify indel mutations that were more likely to have occurred in the tumor than the normal. Since we knew that the skin sample used as the matched normal for this experiment contained tumor cells, we implemented the following scheme to identify putative somatic indels. Analogous to our approach for SNVs, we performed a comparison of the Samtools likelihoods of the indel in tumor and normal reads to generate a somatic score representing the Phred scaled probability that each indel is somatic. We then removed indels where any of the following conditions was true: the somatic score was 0, the Samtools tumor and normal consensus calls were the same, the Samtools call in normal was not wildtype, or the number of reads was greater than 100. Furthermore, for predictions of 1-2 base pairs in size, we performed a one-sided Fisher's Exact test on the read counts supporting the indel in tumor and normal to test if the indel occurred at a lower frequency in the normal. We removed 1-2 bp indels where this p-value was greater than 0.01. Finally, we removed predictions found to be contained or adjacent to runs of base quality 2 bases as these are set to indicate a failure in base calling during the Illumina Base Calling Pipeline and we found that many indel predictions arose solely from these reads.

Pindel<sup>5</sup> was used for calling tier 1 indels in 7 primary tumors except for UPN 933124. GATK<sup>6</sup> and Pindel were used for detecting indels in 7 relapse tumors except for UPN 933124.

Indels and SNVs were grouped into tiers based on genome annotation as described previously<sup>1,4</sup>. Calls falling on the Y chromosome were removed for female patients. Mutations identified in the relapse sample with <2% allele frequencies in the primary tumor were classified as relapse-specific.

### **Structural variant detection**



Structural variants (SVs) in all samples were predicted by BreakDancer<sup>7</sup> and SquareDancer (unpublished). Then, all predictions were assembled using TIGRA (Chen et al, in preparation). We followed the same procedure as described in Ding et al.<sup>4</sup> for selecting somatic SVs.

### **Capture array design**

In UPN 933124, we have selected 6,332 raw predictions, including 1,203 SNVs (496 passed filters) and 5,155 small indels from non-repetitive regions of the genome (tiers 1-3) and 154 SVs (including 16 predicted translocations) genome-wide for capture validation design. A large number of predicted low-confidence sites were included in this validation experiment to reach the optimal size of territories ( $\geq 1$ Mbp) required for the capture chip and ensure the sensitivity of our discovery. Nimblegen was able to successfully design capture oligos for 96% of targets.

We used custom sequence capture arrays from Roche Nimblegen to validate our mutations. We requested  $>200$ bp target regions centered on the variant of interest. For small insertions and for SNVs the targeted regions were exactly 200bp. For small indels, we requested regions beginning 100bp upstream of the beginning of the prediction and 100bp downstream of the end of the predicted deletion and thus these regions were slightly longer.

For structural variants, we requested probes tiled across the predicted breakpoint and buffered on 100bp of each side of the, possibly ambiguous, predicted breakpoint. Thus, for insertions a single region is requested, but for translocations, deletions, inversions etc, we requested two regions, one for each breakpoint. Since BreakDancer reports regions of ambiguity around the breakpoints, we buffered 100bp upstream and downstream of these regions and requested probes for the entire region. Rather than limit the probes to strictly unique sequences, we requested that Roche Nimblegen include probes that matched up to five other places in the genome as well as the unique probes during probe design.

The same strategy was used for capture validation design and analysis for the 7 other AML cases.

### **Tumor content estimation**

As a result of validation of predicted mutations via solid phase capture, we obtained read counts with deep coverage ( $>30$  reads) of valid somatic mutations in the tumor and relapse samples. To estimate the sample purity and clonality, we used the proportion of reads supporting the variant allele for each mutation and performed clustering on this value in the tumor and normal to estimate the tumor content. We first removed sites on sex chromosomes and then defined clusters using the DBSCAN (Ester, Kriegel, Sander and Xu, 1996), a density-based algorithm for discovering clusters in large spatial databases with noise. DBSCAN

functions by defining a maximum distance between points that a point can have to belong to a cluster and a minimum number of points to define a cluster. Clusters are then defined recursively, beginning with random seeds. For our clustering, we used the default settings of 2 for maximum distance and 5 for minimum number of points. This yielded reasonable results with manual review, though it does not take into account the differences in depth between each data point. To calculate the frequency of each sample, we took the median of the variant allele frequency of each point in the cluster, and assuming that these represent heterozygous mutations, we multiplied the resulting number by two to generate an estimated purity. We repeated this calculation for the variant allele frequency in the normal for these clusters to obtain an estimate of the normal sample purity as well. Utilizing the mutant allele frequencies of mutations from two major clusters, we estimated the malignant cellular content of the AML samples (UPN 933124) at 29.46% for the skin, 93.7% for the primary tumor sample and 84.5% for the relapse sample. These numbers are very consistent with the kernel density analysis which estimated 29.4%, 93.6%, and 84.2% tumor contents for the skin, primary tumor, and relapse samples, respectively (See below “Kernel density analysis for identifying clusters and estimating allele frequencies for each cluster” section), as well as the bone marrow morphology, which revealed 100% myeloblasts in the primary sample, and 78% myeloblasts in the relapse sample. In this study, we performed deep resequencing for tier 1-3 mutations in the tumor, relapse, and matched skin samples of AML1 using three approaches: 1) solid phase capture followed by Illumina sequencing; 2) PCR amplification of mutations followed by 454 sequencing; and 3) PCR amplification of mutations followed by Illumina sequencing. We not only obtained high concordance across three experiments, but also obtained high depth of coverage for each site. We are much more confident about the 29% tumor content estimation than we were with the original estimate of 5-13% tumor contamination of skin reported in our initial report<sup>8</sup>, since it is based on deep reads from three experiments and a much larger number of mutation sites. Only solid phase capture followed by Illumina sequencing was used for all 8 cases and we have obtained an average of combined coverage of 1,946 reads for the skin, primary tumor, and relapse samples across all cases.

### **Solid phase capture validation for mutation predictions in the skin, primary tumor, and relapse tumor samples**

Whole genome amplified (WGA) DNA samples (3ug) were constructed into Illumina libraries according to the manufacturer’s protocol (Illumina Inc, San Diego, CA) with the following modifications: 1) DNA was fragmented using Covaris S2 DNA Sonicator (Covaris, Inc. Woburn, MA). Fragment sizes ranged between 100 and 500bp. 2) Illumina adapter-ligated DNA was amplified in a single 50µl PCR for five cycles. 3) Solid Phase Reversible Immobilization (SPRI) bead cleanup was used to purify the PCR and select for 300-500bp fragments.

One microgram of the size-fractionated Illumina library was hybridized to the probe set synthesized on the Nimblegen HD2 array according to the manufacturer’s protocol (Nimblegen, Madison, WI). After the 72 hour,

42 °C hybridization, the array was removed from the hybridization station, washed, and the capture library fragments were PCR amplified according to the manufacturer's protocol with the exception: we used 16 cycles in the PCR as opposed the stated 20.

Illumina library quantification was completed using the KAPA SYBR FAST qPCR Kit (KAPA Biosystems, Woburn, MA). The qPCR result was used to determine the quantity of library necessary to produce 180,000 clusters on a single lane of the Illumina GAIIx. One lane of 100bp Paired-End data was generated for each captured sample. Specific details are below.

### Paired-end library preparation

Genomic DNA (50 ng) was sent to QIAGEN for whole genome amplification (QIAGEN, Germantown, MD). Whole genome amplified (WGA) DNA samples (3 µg) were suspended in 1X DNATerminator® End Repair Buffer (Lucigen Corp., Madison, WI) and fragmented in MicroTube (6x16mm), AFA Fiber with Snap-Cap tubes (Covaris™) using the Covaris S2 DNA Sonicator (Covaris, Inc. Woburn, MA). Fragmentation conditions were in 50 µl reaction volumes and performed at 4°C. The S2 parameters were set to the frequency sweeping mode using two successive, 60 second, acoustic treatments of: 1) duty cycle=20%, intensity=5, cycle/bursts=500. The DNA fragments were end repaired by directly adding 2 µL of the DNATerminator® End Repair Enzyme cocktail (Lucigen Corp. Madison, WI) to the MicroTube and incubating at room temperature for 30 minutes. The end-repair reactions were purified using Solid Phase Reversible Immobilization (SPRI) by adding 90 µL (1.8X sample volume) of AMPureXP beads (Agencourt Bioscience, Beverly, MA) to the end-repair reaction. The bead milieu was incubated for 5 minutes at room temperature, allowing the DNA to bind to the beads. The beads were then immobilized against a magnetic particle collector (MPC; Invitrogen, Carlsbad, CA), washed twice with 500 µl of 70% ethanol, and air dried for 5 minutes. DNA fragments were released by adding 32 µl of 10 mM Tris-HCl (pH 8.0).

End-repaired DNA fragments were tailed with 0.2 mM deoxyadenosine triphosphate in the presence of 15U Klenow exo<sup>-</sup> (New England Biolabs, Worcester, MA) at 37° for 30 minutes. Each 50 µL reaction was mixed with 90 µl AMPureXP beads, as described above (Agencourt Bioscience, Beverly, MA). DNA was eluted in 20 µL of 10 mM Tris-HCl (pH 8.0). Illumina adapters were ligated to A-tailed DNA fragments per the manufacturers protocol (Illumina Inc, San Diego, CA) in the presence of 1X Quick Ligase Buffer and 10,000U Quick Ligase (New England Biolabs, Worcester, MA) at 25° C for 15 minutes. Small fragments less than 100 base pairs and unligated adapters were removed from the mix by AMPureXP bead purification (as reported above). The adapter-ligated DNA samples were eluted in 20 µL of 10 mM Tris-HCl (pH 8.0).

### Illumina library amplification

A PCR amplification master mix was prepared using 160 nM of the Illumina paired-end oligonucleotides 1.0 (PE1.0: 5'-AATGATACGGCGACCACCGAGATCTACACTCTTTCCCTACACGACGCTCTTCCGATCT) and 2.0 (PE2.0: 5'-CAAGCAGAAGACGGCATAACGAGATCGGTCTCGGCATTCCTGCTGAACCGCTCTTCCGATCT) in 1X Phusion™ High Fidelity PCR Master Mix with HF Buffer (New England Biolabs, Beverly, MA). Four reactions per sample were prepared using 5 µl of adapter-ligated DNA in 45 µl of PCR amplification master mix and PCR amplified with an initial thermal denaturing step of 98° C for 30 seconds followed by 5 rounds of amplification: 98° C, 15 seconds, 60° C, 30 seconds, and 72° C, 30 seconds. After PCR amplification, we enriched for DNA fragments in the 300-500 bp range using two SPRI isolation procedures. Firstly, to remove DNA fragments > 500bp, we added 0.6X volumes (30 µl) of AmpureXP beads and incubated for 5 minutes at room temperature allowing the DNA to bind to the beads. The beads were then immobilized, and the PCR supernatant was aspirated and transferred to the second sizing solution.

A second sizing solution was used to remove DNA fragments less than 300 bp. We aliquoted 60 µL AmpureXP beads into a new 1.7 ml microfuge tube, incubated the bead solutions on the MPC for 3 minutes, aspirated and discarded the supernatant. To the bound beads, we mixed an additional 0.2X volume of AmpureXP beads to the existing beads on the MPC, creating the second sizing solution.

After incubating the PCR supernatant with second sizing solution for 5 minutes, the SPRI beads were bound using the MPC, the supernatant aspirated and discarded leaving magnetic particles coated with 300-500 bp DNA fragments. The beads were washed twice with 500 µL of 70% ethanol, allowed to air dry and eluted in 20 µL of Nuclease-Free Water (Ambion, Austin, TX). The sample was then quantified on the NanoDrop (NanoDrop Products, Wilmington, DE).

### Solid phase capture

300 µl (1µg/µl) of C<sub>0</sub>t-1 DNA (Invitrogen, Carlsbad, CA) was mixed with 1µg of the PCR amplified Illumina library and completely desiccated in a SpeedVac set on 60°C for 1 hour. The sample was then hydrated with 9.2 µl of Nuclease-Free Water (Ambion, Austin, TX) and incubated at 70°C for 10 minutes. Following incubation, 18.5 µl of 2X Hybridization Buffer, 7.3 µl of Hybridization Component A (Nimblegen, Madison, WI), and 1 µl of 1mM PE1.0 and 1mM PE2.0 were added to the sample. The mixture was then denatured at 95°C for 10 minutes and incubated at 42°C until ready for loading.

The Nimblegen HD2 array (Nimblegen, Madison, WI), was prepared by placing the array face-up in the Precision Mixer Alignment Tool (PMAT) (Nimblegen, Madison, WI). A Nimblegen HX1 mixer was snapped into place on the top of the PMAT with the adhesive gasket removed. The PMAT was closed, concomitantly aligning the HX1 mixer onto the HD2 array. The array was placed into a Nimblegen Hybridization System 4 (Nimblegen, Madison, WI), and using a Microman 100 Pipette with CP100 tips (Gilson, Middleton, WI), 37 µl of

hybridization solution was loaded into the fill port. After loading, exposed sample at the fill and vent ports was removed with a clean tissue. The two ports were then closed with port seals (Nimblegen, Madison, WI). The hybridization bay clamp was then closed, the Mixing Panel was set on mix mode B, and library was hybridized to the array for 72 hours at 42°C.

After hybridization, the array-mixer was disassembled in a reservoir containing 100 ml of pre-heated Nimblegen Wash Buffer 2 (47°C) followed by subsequent washes to minimize non-specific carry-over. These washes included: 1) 32 ml of Nimblegen Wash Buffer 2 pre-heated to 47°C, inverting the wash tube 10 times at a rate of 1 inversion per second, 2) Two consecutive washes with 32 ml of Nimblegen Stringent Wash Buffer pre-heated to 47°C, inverting 10 times at a rate of 1 inversion per second and incubating at 47°C for 5 minutes, 3) 32 ml of Nimblegen Wash Buffer 1 at room temperature, inverting for 2 minutes at a rate of 1 inversion per second, 4) 32 ml of Nimblegen Wash Buffer 2 at room temperature, inverting for 1 minute at a rate of 1 inversion per second, and 5) 32 ml of Nimblegen Wash Buffer 3 at room temperature, inverting the wash tube 10 times at a rate of 1 inversion per second.

The array was then placed in an Elution System (Nimblegen, Madison, WI), and covered with the EL1 Elution Chamber (Nimblegen, Madison, WI). Captured library fragments were released from the probe array by adding 900 µl of 0.125 N sodium hydroxide and incubating for 10 minutes at room temperature. The eluant was pipetted from the EL1 Elution Chamber, neutralized by splitting the material into two tubes (~450 µl) containing 16 µl of 20% acetic acid in 500 µl of Buffer PB (QIAGEN, Germantown, MD), and finally purified using MinElute columns (QIAGEN, Germantown, MD). Captured DNA was recovered from MinElute columns in 20 µl of 10 mM Tris-HCl (pH 8.0).

The captured fragments were amplified in the PCR consisting of 25 µl 2X Phusion HF Master Mix (Finnzymes, Woburn, MA), 20 µl captured DNA, 1 µl each 8 µM PE1.0 and PE2.0, and 3 µl of water. Amplification used the following parameters: initial denaturation, 98°C for 30 seconds followed by 16 cycles of denaturation at 98°C for 10 seconds, primer annealing at 60°C for 30 seconds, and extension at 72°C for 30 seconds. After a final elongation at 72°C for 2 minutes, the reactions were pooled and purified with 1.8X volume (360 µl) of AMPure XP beads, washed twice with 500 µl 70% ethanol, and air dried for 5 minutes. The capture libraries were released from the beads with 20 µl of 10 mM Tris-HCl (pH 8.0).

Illumina library quantification was completed using the KAPA SYBR FAST qPCR Kit (KAPA Biosystems, Woburn, MA). The qPCR consisted of 12 µl of KAPA SYBR FAST Master mix (KAPA Biosystems, Woburn, MA), 4 µl of Nuclease-Free Water (Ambion, Austin, TX), and 4 µl of captured library diluted 1:1000 with 10 mM Tris-HCl (pH 8.0). The qPCR result was used to determine the quantity of library necessary to produce ~180,000 clusters on a single lane of the Illumina GAIIx. One lane of 100bp Paired-End data was generated for each captured sample.

## **Analysis of solid phase capture validation data**

We generated 1 Illumina GAllx lane for the normal and 2 Illumina GAllx lanes for the primary tumor and relapse each. Illumina reads were mapped to the Hs36 reference sequence (BWA v0.5.5), merged into BAM files (SAMtools v0.1.9 r783), and marked for duplicates (Picard v1.17). Coverage of target sequences was assessed using RefCov software (T. Wylie et al, unpublished). With respect to the targeted 6,332 variations predicted in the whole genome sequencing data of the relapse, we have obtained greater than 20X coverage for 5,785, 5,598, and 5,512 sites in the skin, primary tumor, and relapse, respectively, and 5,474 sites common to all three samples (Supplementary Table 3).

## **Validation of point and dinucleotide mutations**

Single nucleotide and dinucleotide variants were identified, and their somatic status determined, by VarScan 2 (<http://varscan.sourceforge.net>) with the following parameters:

*-min-coverage 8*

*-min-var-freq 0.15*

*-normal-purity 0.75*

*-p-value 0.10*

*-somatic-p-value 0.01*

*-validation 1*

The provision of a normal purity less than 1 (in this case, 0.75) allows VarScan to adjust the observed allele frequencies based on an expected ~25% contamination of normal (skin) DNA by cancerous blood cells. By comparing the allele frequency and read count between tumor and normal, VarScan classifies each position as Reference (wildtype), Germline, Somatic, or LOH. Sites called Somatic are processed with an additional filter that removes false positives suggested by strand bias, read position bias, or poorly mapped reads. Potentially ambiguous sites were resolved by visualization and manual review.

## **Validation of indels**

*Small Indel Validation with Solid-Phase Capture Validation Data*

In order to validate putative somatic small (1-2 bp) indels in the capture dataset, GATK re-alignment was performed for each sample. Specifically, indels were called in the primary alignment BAM for the primary tumor by VarScan 2 using a relaxed set of parameters:

```
--min-coverage 4  
  
--min-var-freq 0.01  
  
--p-value 0.10
```

Putative indels meeting these criteria were converted to BED format and provided as the target intervals for the GATK IndelRealigner algorithm. BAM files for the primary tumor, relapse, and matched normal were re-aligned independently using this set of target intervals. Next, putative somatic and relapse-specific small indels were identified in pairwise comparisons of the re-aligned BAMs by VarScan 2 with the following parameters:

```
--min-coverage 8  
  
--min-var-freq 0.15  
  
--normal-purity 0.75  
  
--p-value 0.10  
  
--somatic-p-value 0.01  
  
--validation 1
```

To validate the original predictions, we developed a matching algorithm that attempts to match VarScan validation calls with the original indel predictions. Specifically, the algorithm searched for a validated indel of same type (insertion or deletion) and similar size (within 1 bp). To allow for differences in gapped alignments, the algorithm allowed matches at slightly different genomic positions, so long as the validated indel mapped within (indel\_size + 2) base pairs of the original prediction. Matched indels called “Somatic” in the primary tumor and/or relapse were manually reviewed in the re-aligned BAM files using IGV. Small indels that passed manual review underwent primer design for orthogonal validation by PCR and 3730/454 sequencing.

#### Medium Indel Validation with Solid-Phase Capture Validation Data

Validation of indels of at least 3 bp, but less than 100bp, in size proceeded by first assembling the capture data for each predicted indel, in each sample, using the TIGRA assembler (Chen et al unpublished) and followed our standard identification of a best contig containing a variant complete with identification of microhomology and variant sequence established for structural variants using Crossmatch (Green unpublished). We then sized the chosen contigs to 150 bp length by trimming excess sequence or padding from the reference sequence

and compared overlapping contigs using the dpAlign module of BioPerl ([http://www.bioperl.org/wiki/Main\\_Page](http://www.bioperl.org/wiki/Main_Page)) to generate an “Ends-free” alignment between the two pairs. If an alignment contained no gaps, had at least 98% identity and had a length of at least 95 bp then the leftmost contig on the reference was arbitrarily retained as the other contig was considered a duplicate. Contigs that remained after merging were concatenated as individual reference sequences to the NCBI build36 reference sequence and the reads mapped back to this expanded reference using BWA<sup>2</sup> and deduplicated using Picard (<http://sourceforge.net/apps/mediawiki/picard>). Once reads were mapped back to the expanded reference support for the reference and variant alleles was counted as the number of reads with mapping quality greater than 0 that completely spanned the range of valid locations for the placement of each variant or reference allele without any gaps in the alignment within the range. Sites with greater than 30 reads aligning to either the reference or the variant and a variant allele frequency difference of greater than 10% between any two samples were manually reviewed and selected for orthogonal validation via 3730 and 454.

#### Orthogonal Validation by 454 Sequencing

Selected primary-specific SNVs, small (1-2 bp) indels, and larger ( $\geq 3$  bp) indels in UPN 933124 were further validated by PCR and deep 454 sequencing. Roche/454 reads were aligned to the Hs36 reference sequence using SSAHA2 v2.5 with the parameters “-454 -best 1 -udiff 1 -output sam”. Read counts for SNVs and indels were determined in the SSAHA2 alignments by VarScan 2 as described above. Only bases with phred-scaled quality of 20 or higher from uniquely mapped, non-duplicate reads were used. To resolve indels  $>11$  bp, we aligned 454 reads to the Hs36 (hg18) reference sequence using BLAT v34, and determined read counts using VarScan. All validated 26 indels are included in Supplementary Table 5b.

#### **Validation of structural variants**

All BWA-aligned capture reads and their mates that map within 500 bp of the structural variant breakpoints were realigned by cross\_match (version 1.080721) to the assembled SV contigs and to the reference. The threshold for an acceptable alignment is  $\leq 1$  unaligned base at either end,  $\leq 1\%$  substitutions,  $\leq 1\%$  indels and a cross\_match score  $\geq 50$ . An SV-supporting read is required to span the breakpoint on the SV contig, covering an additional 10 bases on each side and cannot have an alignment to the reference that meets the minimum alignment criteria. We validated one somatic translocation  $t(10;12)(28864148;870062)$  in AML1 (UPN 933124) and a reciprocal translocation of  $t(15;17)(72113517,35756958)$  and  $t(15;17)(72113430,35756718)$  in AML15 (UPN 758168). The validated events listed in Supplementary Table 8 were predicted by breakdancer and have 10 or more SV-supporting reads in at least one of the tissues or have supporting cytogenetic evidence. In UPN 804168 cytogenetic analysis of seventeen of twenty relapse metaphases contained clonal aberrations including translocation between long arms of chromosome X and 6; and a four way translocation



involving chromosomes 1, 12, 17 and 3 that was evaluated by FISH. None of these clonal aberrations are known to be characteristic of any particular type of tumor. Chromosome analysis was performed at a level of 400 bands or greater.

### **Structural variant analysis**

We assembled two translocations in the 8 cases. One was a known reciprocal t(15;17) translocation, leading to an in-frame *PML-RARA* fusion, in both the primary tumor and relapse samples from UPN 758168 (Supplementary Table 8). The other was a previously unreported relapse-specific translocation, a t(10;12)(28864148;870062) in-frame fusion that involves the *WNK1* and *WAC* genes; it was present in all metaphases at relapse in UPN 933124 (Supplementary Fig. 5a and Supplementary Table 8). This translocation results in a 546 amino acid truncation of the *WNK1* protein, with the introduction of two novel amino acids at the C terminus (V1837fs\_GTX; NM\_018979) that are derived from *WAC* (Supplementary Fig. 5b). Using an extremely sensitive assay that could detect the *WNK1-WAC* fusion gene in as few as 4 cells from the relapse sample, we could not detect the fusion in the primary tumor sample from as many as 75,000 cells (Supplementary Fig. 6). This translocation was confirmed by FISH analysis, but it was not detected in 20 additional, randomly selected AML samples (Supplementary Fig. 7 and Supplementary Information). Both *WNK1* and *WAC* were highly expressed in most AML samples, and the fusion cDNA was detected by RT-PCR in the relapse sample (Supplementary Fig. 8, Supplementary Fig. 9, and Supplementary Table 9). To investigate the functional relevance of the *WNK1-WAC* fusion in relapse, we expressed the full length rat *WNK1* cDNA (kindly provided by Dr. R. Lifton) and its *WNK1-WAC* fusion counterpart in K562 cells. The overexpression of the full length wild-type *WNK1* protein caused significant growth inhibition of these cells. Similar overexpression of the *WNK1-WAC* fusion protein had no effect on K562 cell growth (Supplementary Fig. 10), suggesting the growth inhibition caused by *WNK1* was released by the *WNK1-WAC* fusion, which truncates the C terminus of *WNK1*.

UPN 804168 had normal cytogenetics in the primary tumor, but complex cytogenetics at relapse, with multiple translocations present in 17/20 metaphases. A translocation involving chromosomes X and 6 was detected in the whole genome analysis, and was consistent with the cytogenetic finding of t(X;6)(q22;q23) (Supplementary Information, Supplementary Table 2b, and Supplementary Table 8). However, a very complex rearrangement involving at least four chromosomes (1,12,17,3) suggested by cytogenetics and confirmed by FISH, was not clearly resolved and will require additional study to confirm its precise organization. None of these translocations involve recurrently translocated loci in AML samples, and their relevance for relapse pathogenesis is unknown.

### **Deep sequencing of validated mutations in the primary tumor, relapse, and matched normal samples**

Validated somatic point and dinucleotide mutations identified in UPN 933124 were selected for deep digital sequencing in the tumor, relapse, and matched normal samples. Mutations were amplified by PCR individually, pooled together on a per-sample basis. Sample pools were divided in half for deep digital sequencing on both the Roche/454 and Illumina (GAIIx) platforms. We also performed 3730 sequencing and 454 sequencing of candidate validated indels and primary tumor specific mutations to obtain allele frequency and finalize their somatic status.

### **Analysis of deep sequencing data**

Roche/454 reads were aligned to the Hs36 reference sequence using SSAHA2 v2.5 with the parameters “-454 -best 1 -udiff 1 -output sam”. Illumina reads were aligned to the Hs36 reference sequence using BWA v0.5.5 with soft trimming (-q 5). Following alignment, BAM and pileup files were generated for both platforms using SAMtools v0.1.9 (r783). Illumina BAM files were further analyzed with Picard v.1.17 to remove duplicates.

For both Roche/454 and Illumina/GAIIx datasets, read counts for SNVs were determined by VarScan 2. Only bases with phred-scaled quality of 20 or higher from uniquely mapped, non-duplicate reads were used. For indels, we aligned 454 reads to the human build36 (hg18) reference sequence using BLAT v34, and determined read counts using VarScan.

### **Cross-platform allele frequency analysis**

To calculate the cross-platform SNV allele frequency correlation coefficients, we limited the dataset to the 305 SNVs in UPN 933124 that were not removed by the homopolymer filter. Then, we concatenated the allele frequencies into a single column per platform (i.e. 454-normal, 454-tumor, 454-relapse). That provides three columns (454, Illumina/PCR, and Illumina-Capture) each with 915 data points. Then, we calculated the Pearson correlation coefficient for the data points where both platforms provided a frequency (Supplementary Figure 1).

The correlation coefficients were as follows:

| PLATFORM1 | PLATFORM2        | CORRELATION |
|-----------|------------------|-------------|
| PCR/454   | PCR/Illumina     | 0.9825126   |
| PCR/454   | Capture/Illumina | 0.9581463   |

|              |                  |          |
|--------------|------------------|----------|
| PCR/Illumina | Capture/Illumina | 0.970673 |
|--------------|------------------|----------|

### Tier 1 relapse-specific mutations in UPN 933124

Among the three tier 1 relapse-specific mutations (Supplementary Table 4b), we detected an *ETV6* mutation (R105P), residing in the N-terminal pointed (PNT) domain that is involved in protein-protein interactions. A missense mutation (A2317T) was identified in the *MYO18B* in the relapse genome. Reduced expression of *MYO18B* has been implicated in ovarian cancer<sup>9</sup> and in addition, mutations in *MYO18B* have been associated with lung cancer<sup>10</sup>. The third tier 1 mutation is an eleven base pair insertion (A461fs GARGLSEKPHGK\*) in *STK4*, a cytoplasmic kinase that is structurally similar to the yeast Ste20p kinase. The latter acts upstream of the stress-induced mitogen-activated protein kinase cascade<sup>11</sup>. This mutation was only found in a rare transcript (ENST00000372801). We screened all coding exons of *STK4* and did not detect any additional mutation in 94 AML samples (Data not shown). In addition, mutations in *ETV6*, *STK4*, and *MYO18B* identified in the relapse genome in this study were not detected in 21 additional AML relapse genomes.

### Novel recurring Tier 1 mutations (found in 8 cases) using 200 AML cases whose exomes were sequenced as part of the TCGA AML project

Mutations in two novel genes, *SMC3* and *DAXX* (both involved in chromatin remodeling) were discovered in this study. *SMC3* encodes a component of the cohesin complex, responsible for sister chromatid segregation<sup>12</sup>. UPN 933124 harbors a missense mutation (G662C) in *SMC3*; a total of 6 *SMC3* mutations were found in 200 AML cases, including one nonsense and one splice site mutation. Two missense mutations, including a R371W mutation in UPN 869586, were found in *DAXX*, a death-domain-associated protein. *DAXX* encodes an H3.3 histone chaperone; it co-localizes and cooperates with ATRX (a centromeric heterochromatin component) in replication-independent chromatin assembly at telomeres<sup>13</sup>.

*DIS3* and *DDX41* are both involved in RNA processing. *DIS3* encodes a conserved RNA exonuclease, which is part of the exosome complex<sup>14</sup>. A missense *DIS3* (D488N) mutation<sup>14</sup> was found in UPN 758168, and two missense mutations (M667V and R514K) were found in other AML samples. *DIS3* mutations were recently reported in multiple myeloma<sup>15</sup>. *DDX41* is a putative ATP-dependent RNA helicase, probably involved in pre-mRNA splicing. We identified a splice site (e11+1) mutation in *DDX41* in UPN 426980 (Table 2, Supplementary Table 4b, and Supplementary Fig. 3).

One of the 13 relapse-specific tier 1 mutations was in *ETV6* (R105P), a gene frequently involved in translocations in AML cells, and which also can be mutated or deleted<sup>16,17</sup>; the R105P mutation in UPN 933124

falls in the N-terminal pointed (PNT) domain and is caused by a G->C transversion. An R105Q mutation previously reported in a primary AML case was caused by a G->A transition<sup>17</sup>. The mutant *ETV6* allele was detected in the relapse of UPN 933124, but neither in the primary tumor, nor in any of the 6 remission bone marrow DNA samples collected at successive times after disease presentation (Supplementary Fig. 4 and Supplementary Table 7). Four other relapse-specific missense mutations were found to be recurrently mutated in other AML samples (*MYO18B*, *DAGLA*, *GBP4*, and *DCLK1*; Table 2, Supplementary Table 4b, and Supplementary Fig. 3).

### **Constructing mutation clusters in UPN 933124**

To cluster the frequency data, we used the Mclust algorithm (<http://www.stat.washington.edu/mclust/>; Fraley and Raftery, 2002 and Fraley and Raftery 2006). Mclust uses a normal mixture model combined with Bayesian Information Criteria (BIC) to identify the optimal number of clusters and model of variance and mean. We applied an iterative clustering approach on all (386) point and dinucleotide mutations using the default parameters. This generated 3 clusters, one of which appeared to consist of outliers or small numbers of variants. We took this third cluster and used Mclust a second time to identify the small clusters within this cluster of outliers. The results of both clustering runs are reported in Supplementary Table 5a. More specifically, we identified five distinct mutation clusters, including two major clusters with 305 (cluster 1) and 63 (cluster 5) mutations each and three minor clusters with five (cluster 2), three (cluster 3), and three (cluster 4) mutations respectively (Figure 1 and Figure 2). We discarded 5 low-level mutations, residing in known copy number variable regions (Supplementary Table 5d), as well as considered 2 singletons as outliers. Based on the clustering result, we inferred four clones with distinct mutation compositions in the primary AML sample. Clone 1 contains cluster 1 mutations. Clones 2 and 3 are derived from clone 1 and acquired mutations from clusters 2 and 3, respectively. Subsequently, likely a single cell within clone 3 gained mutations in cluster 4 to form clone 4: the clone that survived chemotherapy regimen and moved forward to become the dominant clone in relapse. One tier 2 mutation in cluster 4 resides in ORegAnno (open regulatory annotation)<sup>18</sup> and regPotential7X (regulatory potential computed from 7 species alignment)<sup>19,20</sup>, provided by the UCSC Genome Browser, indicating a possible relevance to chemotherapy resistance.

### **Kernel density analysis for identifying clusters and estimating allele frequencies for each cluster in all 8 AML cases**

Tumor clonality estimates were determined using the mutation allele frequencies from deep readcount validation data. To minimize the effect of coverage on allele frequency estimations, only mutations with >100x coverage in the normal, tumor and relapse validation data were included in this analysis. Because genomic copy number can influence the observed allele frequency of a mutation, mutations were segregated according

to their segmented copy number states from cnvHMM (2, 3, or 4), and analyzed separately. For each copy number state in the normal, tumor, we draw a kernel density estimate (KDE) plot for tumor variant allele frequencies using the density function in R. A customized R function evaluated each KDE plot to determine the number of significant peaks at the diploid copy number (CN=2), which serves as an estimation of the number and relative composition of clones present in each tumor.

### **Analysis of relapse-specific mutations**

Mutations with variant allele frequency < 2% were classified as relapse-specific (Supplementary Figure 1b). Based on binomial distribution, we tested if the variant frequency of relapse-specific mutations from each sample is different from 1% error rate. One sample (UPN 426980) showed no significant difference from expected based 1% error rate, but the other 7 were non-randomly skewed towards 0% variant reads (p values all <4.89e-12).

AML1 (UPN 933124) p-value= 1.4821e-323  
AML15 (UPN 758168) p-value= 1.2014e-171  
AML27 (UPN 400220) p-value= 4.7412e-63  
AML28 (UPN 426980) p-value= 0.26108  
AML31 (UPN 452198) p-value= 4.8943e-12  
AML35 (UPN 573988) p-value= 9.432e-28  
AML40 (UPN 804168) p-value= 2.0802e-149  
AML43 (UPN 869586) p-value= 6.0977e-18

To define relapse-specific mutations, we identified all validated mutations in the relapse samples, and compared the variant allele frequencies to the primary AML sample from the same individual. We defined mutations as relapse-specific if the variant allele frequency was <2% in the primary sample, based on established error frequency estimates of Illumina sequencing<sup>21,22</sup> (Supplementary Figure 1b and Supplementary Table 4a). However, we explored the actual readcounts for the relapse-specific mutations in all 8 primary tumor samples to see whether the variant reads were distributed randomly below 2%, or whether they were significantly skewed within the 0-2% range. For the 472 relapse-specific mutations, we obtained a median of ~600x coverage (and a mean of ~2,500x coverage because of extra coverage for UPN 933124) in the primary AML samples. A total of 1,195,650 reads were evaluable; of these, only 1,601 (0.13%) were variant in the primary AML samples. Moreover, when we evaluated the variant allele frequency for each of the 472 mutations independently, 45% (213/472) had no variant reads at all in the primary tumor samples (see Supplementary Figure 1b). Seven of the 8 samples were non-randomly skewed towards 0% variant reads (P values all <4.89E-12), but one was not (UPN 426980). Although some variant reads are clustered just above 0% in several samples (suggesting that very rare cells in the primary AML samples may contain these

mutations), these data strongly suggest that cells containing many of the mutations classified as relapse-specific were truly absent in the primary tumor sample, but arose later in the course of the disease.

### **Effects of high tumor content in skin sample on mutation detection**

Two patients (UPNs: 573988 and 452198) had only 7 and 11 tier 1 mutations, respectively. The small number of detected mutations in these two patients is probably due to the high tumor content in the skin samples (28.2% for UPN 573988 and 40.8% for UPN 452198) and low tumor content in the relapse samples (28.6% for UPN 573988 and 36% for UPN 452198), which both reduce variant detection sensitivity (Supplementary Table 4b and Supplementary Table 6). Skin samples were frequently found to have significant tumor contamination if the peripheral white blood cell count was >30,000 ul at the time of banking, a problem that has subsequently been rectified by banking skin in first remission.

### **Stable and transient expression of WNK1 and WNK1/WAC in K562 cells**

K562 cells were cultured to a density of  $1 \times 10^6$  cells/mL and nucleofected (Lonza, Kit V, Program T-16) with 2 (stable) or 5 (transient) ug of empty MSCV, MSCV-WNK1 or MSCV-WNK1-WAC plasmids, all containing an IRES-GFP cassette. Rat WNK1 cDNA in the pcDNA3.1 (-) vector was kindly provided by Dr. Richard Lifton. Full length WNK1 was cloned out of the vector by PCR with primers to insert a Kozak sequence (Forward 5' GAATTCGCCGCCACCATGTCTGACGGCACCGCAGAGAAGCAGAGC 3'; Reverse 5' CTCGAGGCCTAAGCGTAATCTGGAACATCATATGGGTAGGTG 3'). To create the WNK1-WAC fusion, the 8 bp of WAC sequence were added to the reverse primer (Forward – same as above, Reverse 5' GCCTCGAGGCTTAAGTGCCACCCTTCTGAGGTTCACTTCCTGCTTCTGTAAGT 3'). After sequencing, both PCR products were cloned as EcoR1/Xho1 fragments into an MSCV IRES-GFP vector (empty vector control shown as 'IRES GFP' in Supplementary Fig. 6).

### **Screening for recurrently mutated genes in additional AML tumors**

We screened the coding exons for *WNK1* and *WAC* genes in 187 AML tumors to identify additional mutations. Matched normals were sequenced to determine somatic status. We have also detected a *WNK4* mutation (R669W) in an M7 AML case (UPN 509754) with an event free survival of 70 months. We found three additional somatic mutations in *WAC*, including a 5 bp frameshift insertion (GGGCA, p.E88fs, UPN 869586, a patient who relapsed after 7.7 months, and expired at 19 months with progressive disease) and two splice site mutations (e12+1, UPN 321258, an M3 AML patient who is alive and in remission at >64 months, and e10-2, UPN 301733, a patient with M2 AML who relapsed at 13.7 months, and died of progressive disease at 19.3

months). Although the function of *WAC* is unknown, the translocation, insertion, and point mutations all have translational consequences for this gene, suggesting its relevance for AML pathogenesis.

### In silico screening for recurrently mutated genes using 200 AML tumors

To determine if genes with mutations from the 8 AML cases identified in this study are recurrently mutated in AML, we compared our results to the mutations found in TCGA AML project (T.J. Ley, R.K. Wilson, and the Cancer Genome Atlas working group on AML, unpublished) and also an in-house M1 and M3 AML genome project (J.S. Welch, T.J. Ley, unpublished). Mutations without validation status are required to have 20X coverage in both normal and tumor samples to be included in the analysis (Table 2, Supplementary Table 4b, and Supplementary Fig. 3)

### Mutation expression by 454 cDNA sequencing

Primers were used for evaluating the expression of mutations in *MYO18B*, *ETV6*, *STK4*, and *DNMT3A* are below.

| Gene   | Name                     | Sequence               | Genomic position (hg18)                         |
|--------|--------------------------|------------------------|-------------------------------------------------|
| MYO18B | tvi.t/MYO18B_24752889_f1 | CTCTCCCCATTTACCAGACG   | chr22:24752770-24752789                         |
| MYO18B | tvi.t/MYO18B_24752889_r1 | CGACTTTTCGGGGAGTAGG    | chr22:24752953 -24752972                        |
| ETV6   | ETV6_11883491_F20        | TGTAGCATTAAGCAGGAACGAA | chr12:11694350-11694361,chr12:11796651-11796660 |
| ETV6   | ETV6_11883491_R20        | TCATGGTTCTGATGCAGTATGA | chr12:11897736-11897757                         |
| STK4   | tvi.t/STK4_43115216_F_TV | GATCAACAGCTTTGGCAAGAGT | chr20:43087101-43087122                         |
| STK4   | tvi.t/STK4_43115216_R_TV | GGAGAGACGACAGAGCAGAAGT | chr20:43137314-43137335                         |
| DNMT3A | DNMT3A_25317018_F20      | GTCTCTCTTTGATGGAATCGCT | chr2:25320275-25320296                          |
| DNMT3A | DNMT3A_25317018_R20      | CACTTCTTTGGCATCAATCATC | chr2:25315556-25315577                          |

Full cDNA sequences were generated based on the Hs36 reference sequence and gene structure information obtained from the UCSC Genome Browser Database (refGene.txt). Roche/454 reads were mapped to cDNA sequences using SSAHA2 v2.5.3 with the parameters: -454 -best 1-udiff 1 -output sam. BAM and pileup files were generated using SAMtools v0.1.9 (r783). Read counts and allele frequencies for each mutation were determined by VarScan 2.

RT-PCR of tumor and relapse samples was performed separately using MID-tailed primers, and then pooled for a one-quarter (1/4) run of 454 sequencing. Some 350,626 reads were generated, with an average read length of 305 bp. In-house algorithms were used to assign reads to tumor or relapse based on the MID primer sequences. Of these, 177,463 reads (50.61%) and 172,289 reads (49.14%) were assigned to tumor and relapse, respectively. The remaining 874 reads (0.25%) had missing or incomplete MID sequences and were discarded.

To assess expression of SNVs, reads were aligned to the Hs36 (hg18) reference sequence using BWA-SW<sup>2</sup>. BAM and pileup files were generated using SAMtools. Read counts for each allele were determined using VarScan 2. Only bases with phred-scaled quality of 20 or higher from uniquely mapped 454 reads were used.

To avoid alignment bias while assessing indel expression, reads were aligned to the Hs36 (hg18) reference sequence using BLAT v34. Indels were detected in the BLAT alignments and read counts generated using VarScan. For sites where no indel was present, reference-supporting reads were determined from the Q>20 read depth of BWA-SW alignment BAM files. Expression of tier 1 mutations is included in Supplementary Table 4b.

We performed RT-PCR amplification of the target regions using RNAs from the primary tumor and relapse from UPN 933124 and sequenced the products using the Roche 454 (Supplementary Table 4b). Mutant allele expressions for all three mutations (*ETV6*, *MYO18B*, and *STK4*) in the primary tumor are below the error rate, consistent with their absence in the primary tumor genome. In the relapse tumor, we detected 28.6% (800/2797) and 66.6% (317/476) of mutant allele expression in *ETV6* and *STK4*, respectively, while no expression of the *MYO18B* mutation was detected (Table 1). The latter observation is consistent with *MYO18B*'s predicted tumor suppressor functionality. As expected, the expression of the *DNMT3A* mutant allele was detected in both the primary tumor (38.9%) and relapse (29.8%).

### **WNK1-WAC RT-PCR**

Transcript specific primer pairs to validate the *WNK1/WAC* fusion were designed using Primer-BLAST (<http://www.ncbi.nlm.nih.gov/tools/primer-blast/>). The BLAST results are used to rank primer pairs to help avoid pairs that may produce amplification products other than the intended target. Parameters for design included limiting the design space to ensure that no primer aligned closer than 75 base pairs to any of the intended targets and all spanned at least one intron. Primers were designed specific to *WNK1*, *WAC*, and the proposed *WNK1/WAC* fusion.

PCR reactions were assembled with the Amplitaq Gold PCR Master Mix (Applied Biosystems). The manufacturer's protocol (see below for cycling parameters) was followed for the KAPA kit using 2µL of the cDNA product. The Amplitaq protocol combined 2µL of the cDNA product with 1µL of 1.2 µM gene-specific primers, 1.6µL 50% Glycerol, and 5µL of Amplitaq Gold PCR Master Mix (Applied Biosystems). The reactions



were then centrifuged to ensure all reaction components were collected at the bottom of the well and cycled with the corresponding parameters:

Amplitaq Parameters:

- Step 1: 96.0°C for 5 minutes
- Step 2: 94.0°C for 30 seconds
- 60.0°C for 45 seconds
- 72.0°C for 45 seconds
- Repeat Step 2 for 39 additional cycles
- Step 3: 72.0°C for 10 min.
- Step 4: 4.0°C Hold

The resulting PCR products were imaged on 1.5% Agarose gel with Ethidium Bromide. The primer sequences used are below. Both primer sets produced products validating the fusion.

| Name                | Sequence                 | Genomic position (hg18)                         |
|---------------------|--------------------------|-------------------------------------------------|
| WAC/WNK1_F8 (set 1) | GGAGTGAAACCTGGAAGTGC     | chr12:865461-865480                             |
| WAC_R2 (set 1)      | CTGCAGAATCATAAGGTGCAT    | chr10:28918671-28918687,chr10:28912436-28912440 |
| WNK1_F1 (set 2)     | AACAGTTGCTTTGCCAGTTACA   | chr12:865388-865409                             |
| WAC_R1 (set 2)      | GAGCAAACACTACTGGCATCACTG | chr10:28924684-28924705                         |

The 3730 trace data for the fusion product are shown in Supplementary Figure 9.

### Detecting the *WNK1-WAC* fusion using interphase and metaphase FISH

FISH experiments were done to confirm a rearrangement in the *WNK1* gene (chr12: 732486-890879) in UPN 933124 using standard techniques. The RP11-60J20 (chr12: 620933-775520) and RP11-359B12 (chr12: 858584-1084640) BAC clones were obtained from Empire Genomics in the form of DNA. 500 ng of RP11-60J20 DNA was labeled with Spectrum Green dUTP and 500 ng of RP11-359B12 was labeled with Spectrum Orange by nick translation (Vysis), following the manufacturer's instructions. The two BAC clones were then mixed together in equal proportions resulting in a break-apart probe mixture. A normal signal pattern would show a yellow signal where a rearrangement would display two separate signals, one green, one orange.

Slides were analyzed using a fluorescence microscope, and images recorded using Cytovision software. Quantitative FISH analysis was used to confirm a normal signal pattern (2 yellow signals) versus a *WNK1* gene rearrangement (1 yellow/1 green/1 red signal) (Supplementary Figure 7). This procedure was carried out for 100 interphase cells and 20 metaphase cells in each probe experiment.

### **Deep sequencing of mutations in FFPE samples from UPN 933124**

Selected mutations were selected for deep resequencing in the time course experiment. Individual PCR amplifications with MID-tailed primers were performed so that samples could be pooled for sequencing on the Roche/454 platform. In-house algorithms were used to assign reads to each sample based on the MID primer sequences. Read counts were generated as described above (see Analysis of deep resequencing data). The results are included in Supplementary Table 7.

### **Time course analysis using FFPE samples from UPN 933124**

To determine when the relapse-specific mutations first appeared during the course of the disease in UPN 933124, we quantified the variant alleles using deep digital sequencing for 3 relapse-specific coding mutations (in *ETV6*, *MYO18B*, and *STK4*), and a subset of mutations found in both the *de novo* and relapse genomes (including mutations in *DNMT3A*, *NPM1*, *FLT3*, and *PTPRT*) using 7 bone marrow DNA samples collected at different time points after presentation: day 0 (*de novo* tumor, initial diagnosis), day 43 (1<sup>st</sup> remission), day 121 (continued 1<sup>st</sup> remission), day 170 (30 days post auto transplant), day 338 (1<sup>st</sup> relapse, the sample that underwent whole genome sequencing), day 422 (2<sup>nd</sup> remission, day 30 post allogeneic stem cell transplantation), and day 501 (continued 2<sup>nd</sup> remission). None of the mutations could be detected in any of the remission samples. Most importantly, none of the relapse-specific mutations were detected before the 1<sup>st</sup> relapse. Since deep digital sequencing has a sensitivity of about 1 in 50 cells (because of the inherent error rates of the 454 and Illumina platforms), these data do not allow us to conclude whether the relapse-specific mutations were present in rare cells in the *de novo* sample, or whether they were acquired during disease progression (Supplementary Fig. 4 and Supplementary Table 7). We therefore evaluated the timing of the *WNK1-WAC* fusion appearance, using PCR linked to Southern blotting to increase sensitivity and specificity (Supplementary Fig. 6). We were able to reproducibly detect the *WNK1-WAC* fusion DNA from 4 cell equivalents of the relapse DNA sample. We did not detect any signal using 1000 ng of the genomic DNA from the *de novo* tumor (which represents more than 150,000 cell equivalents of DNA). These data suggest that fewer than 4 cells in 150,000 (1/37,500) contain the *WNK1-WAC* fusion in the *de novo* tumor. These data support the idea that the translocation was not present in the *de novo* AML cells, but occurred later. One or more of the relapse-specific mutations presumably conferred a critical growth advantage, since a single dominant clone was present at relapse.

## High sensitivity qPCR-Southern blot analysis of the *WNK1-WAC* fusion

Genomic and WGA DNA were quantified by Quanti-iT dsDNA HS and Qubit (Invitrogen, Eugene, OR) and analyzed by qPCR using QuantiTect SYBR-Green (Qiagen, Valencia, CA) and 7300 Real Time PCR (Applied Biosystems, Foster City, CA) per manufacturer specifications. The following primers were used: *WNK1* primer 4 caatcacagaagcaggaacaca, *WAC* primer 2 atctataaaccaccttgacac, *WNK1* primer 3 tactaccaatgctcctcagttat, *WNK1* primer 6 tgtgttctgctctgtgattg, *WNK1* primer 7 aagaccataggaaaggcaacga. *WNK1* primer 4-*WAC* primer 2 were used to assess the *WNK1-WAC* fusion; *WNK1* primer 4-*WNK1* primer 3 and *WNK1* primer 6-*WNK1* primer 7 were used as controls to assess the quantity of genomic *WNK1* DNA. The annealing temperature was 59 degrees and we performed 40 cycles of PCR. PCR products were loaded into a 1% agarose gel. Following electrophoresis, the gel was washed with 0.5 M NaOH + 1.5 M NaCl and then with 0.5 M Tris pH 7.5 + 1.5 M NaCl and transferred to Hybond-XL (Amersham, GE Healthcare, Piscataway, NJ) in 20x SSC. DNA was fixed with a UV Stratalinker 2400 (Stratagene, La Jolla, CA). A sequence-validated probe was generated that spanned the *WNK1-WAC* fusion using two primers (cctaccgtagttgattcagg, atctataaaccaccttgacac), Random Primers DNA Labeling system (Invitrogen), and MicroSpin S-200 HR columns (GE Healthcare). Southern hybridization was performed with QuickHyb (Stratagene) and 12.5 x 10<sup>6</sup> probe cpm and visualized by x-ray radiography. Data analysis was performed using Applied Biosystems 7300 software, Excel (Microsoft, Seattle, WA) and GraphPad (Prism, La Jolla, CA).

## Gene ontology analysis for nonsynonymous mutations in 8 cases

Gene set analyses were performed using the GO Enrichment tool of Gene Set Analysis Toolkit V2<sup>23</sup> (<http://bioinfo.vanderbilt.edu/webgestalt>). Gene-level GO analyses were performed using GeneCodis 2.0<sup>24</sup> (<http://genecodis.dacya.ucm.es>). We analyzed the mutations in all 8 genomes for recurring pathway mutations that could explain the relapse phenotype, but none was identified. Specifically, gene ontology (GO) analysis revealed no significant enrichment for mutations in drug transport or metabolism processes; however, gene-level analysis revealed that seven genes associated with “transmembrane transport” (GO: 0055085) contained mutations with translational consequences in five of the AML samples (**Supplementary Table 12**); six mutations were detected in both the primary and relapse samples, and one (*SLC25A12*, R603W) was relapse-specific. Three members of the *SLC* gene family contained mutations (*SLC25A12*, *SLA15A1*, and *SLC30A6*); importantly, biallelic mutations in a related family member, *SLC29A1*, have been implicated in cytarabine resistance in a human leukemia cell line<sup>25</sup>. None of these genes had non-synonymous mutations in 28 AML cases with long first remissions (>36 months), and only 6 of these 28 samples contained mutations in the *SLC*, ABC transporter, potassium channel, or GABA receptor gene families. Although the importance of these

mutations for chemotherapy resistance and/or relapse is impossible to assess in this small series, further evaluation of these genes is warranted as additional data becomes available.

## **Supplementary Figures and Legends**

Supplementary Figure 1a

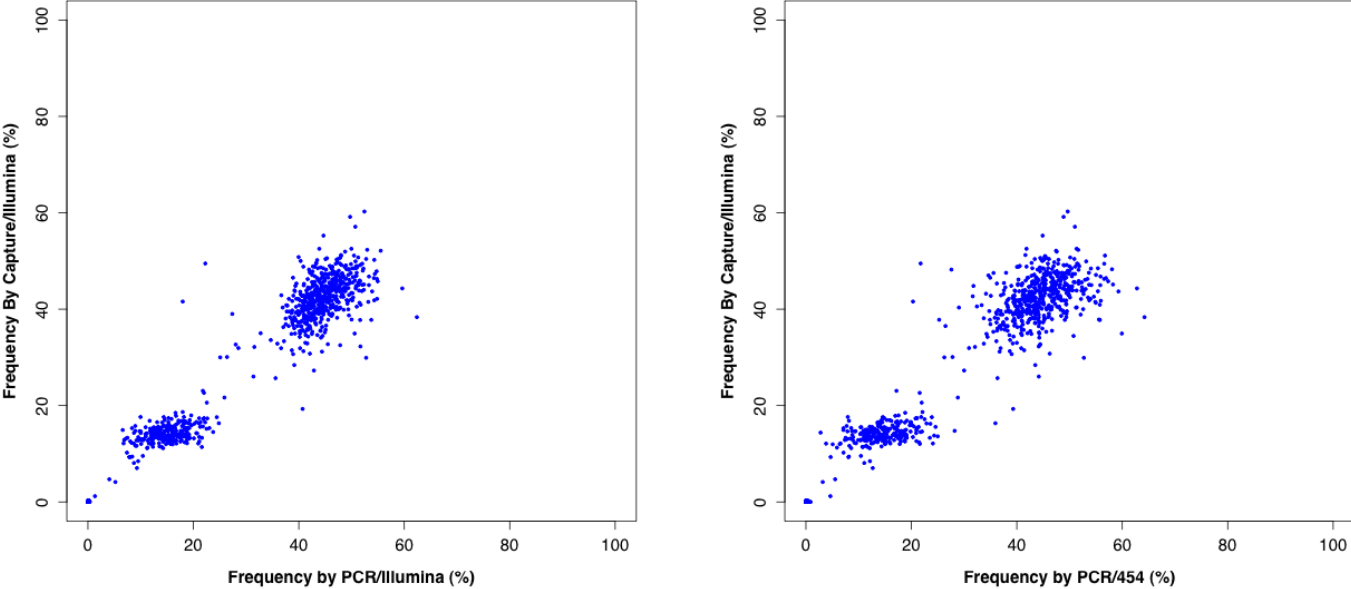

**Supplementary Figure 1a.** The resulting allele frequencies of mutations in the *de novo* tumor and relapse from PCR/Illumina (left) and PCR/454 (right) in comparison to the frequencies obtained from capture validation (capture/Illumina).

Supplementary Figure 1b

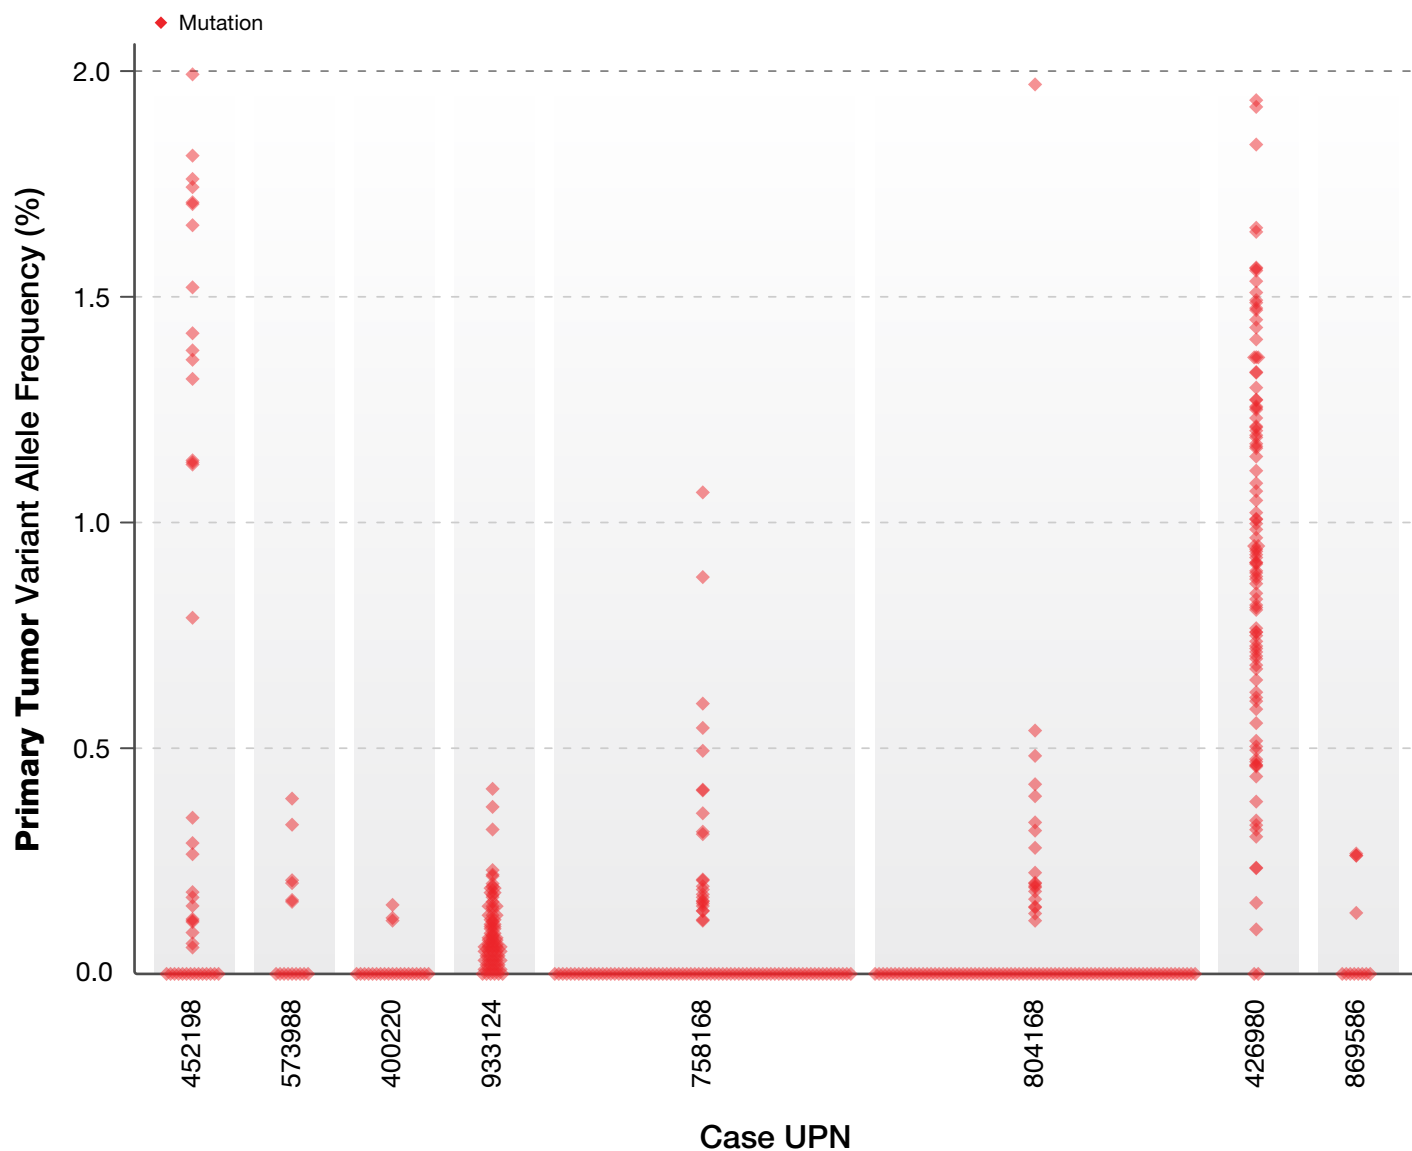

**Supplementary Figure 1b.** Mutations that occur at the same frequency are displayed next to one another, so that the width corresponds to the number of mutations measured. Although a handful of mutations approach the frequency cutoff of 2%, the vast majority of data points occur on or near the x-axis, indicating their near- or complete absence in the primary tumors.

Supplementary Figure 2

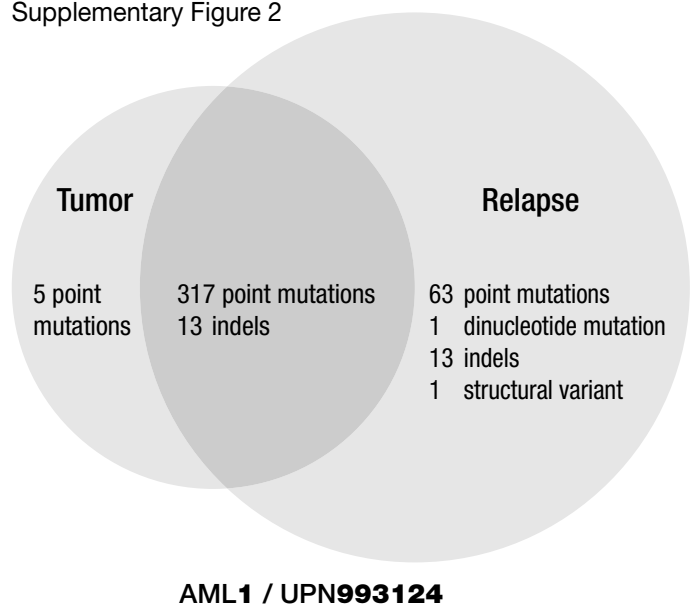

**Supplementary Figure 2.** Venn diagram of mutations found in primary tumor and relapse.



Supplementary Figure 3

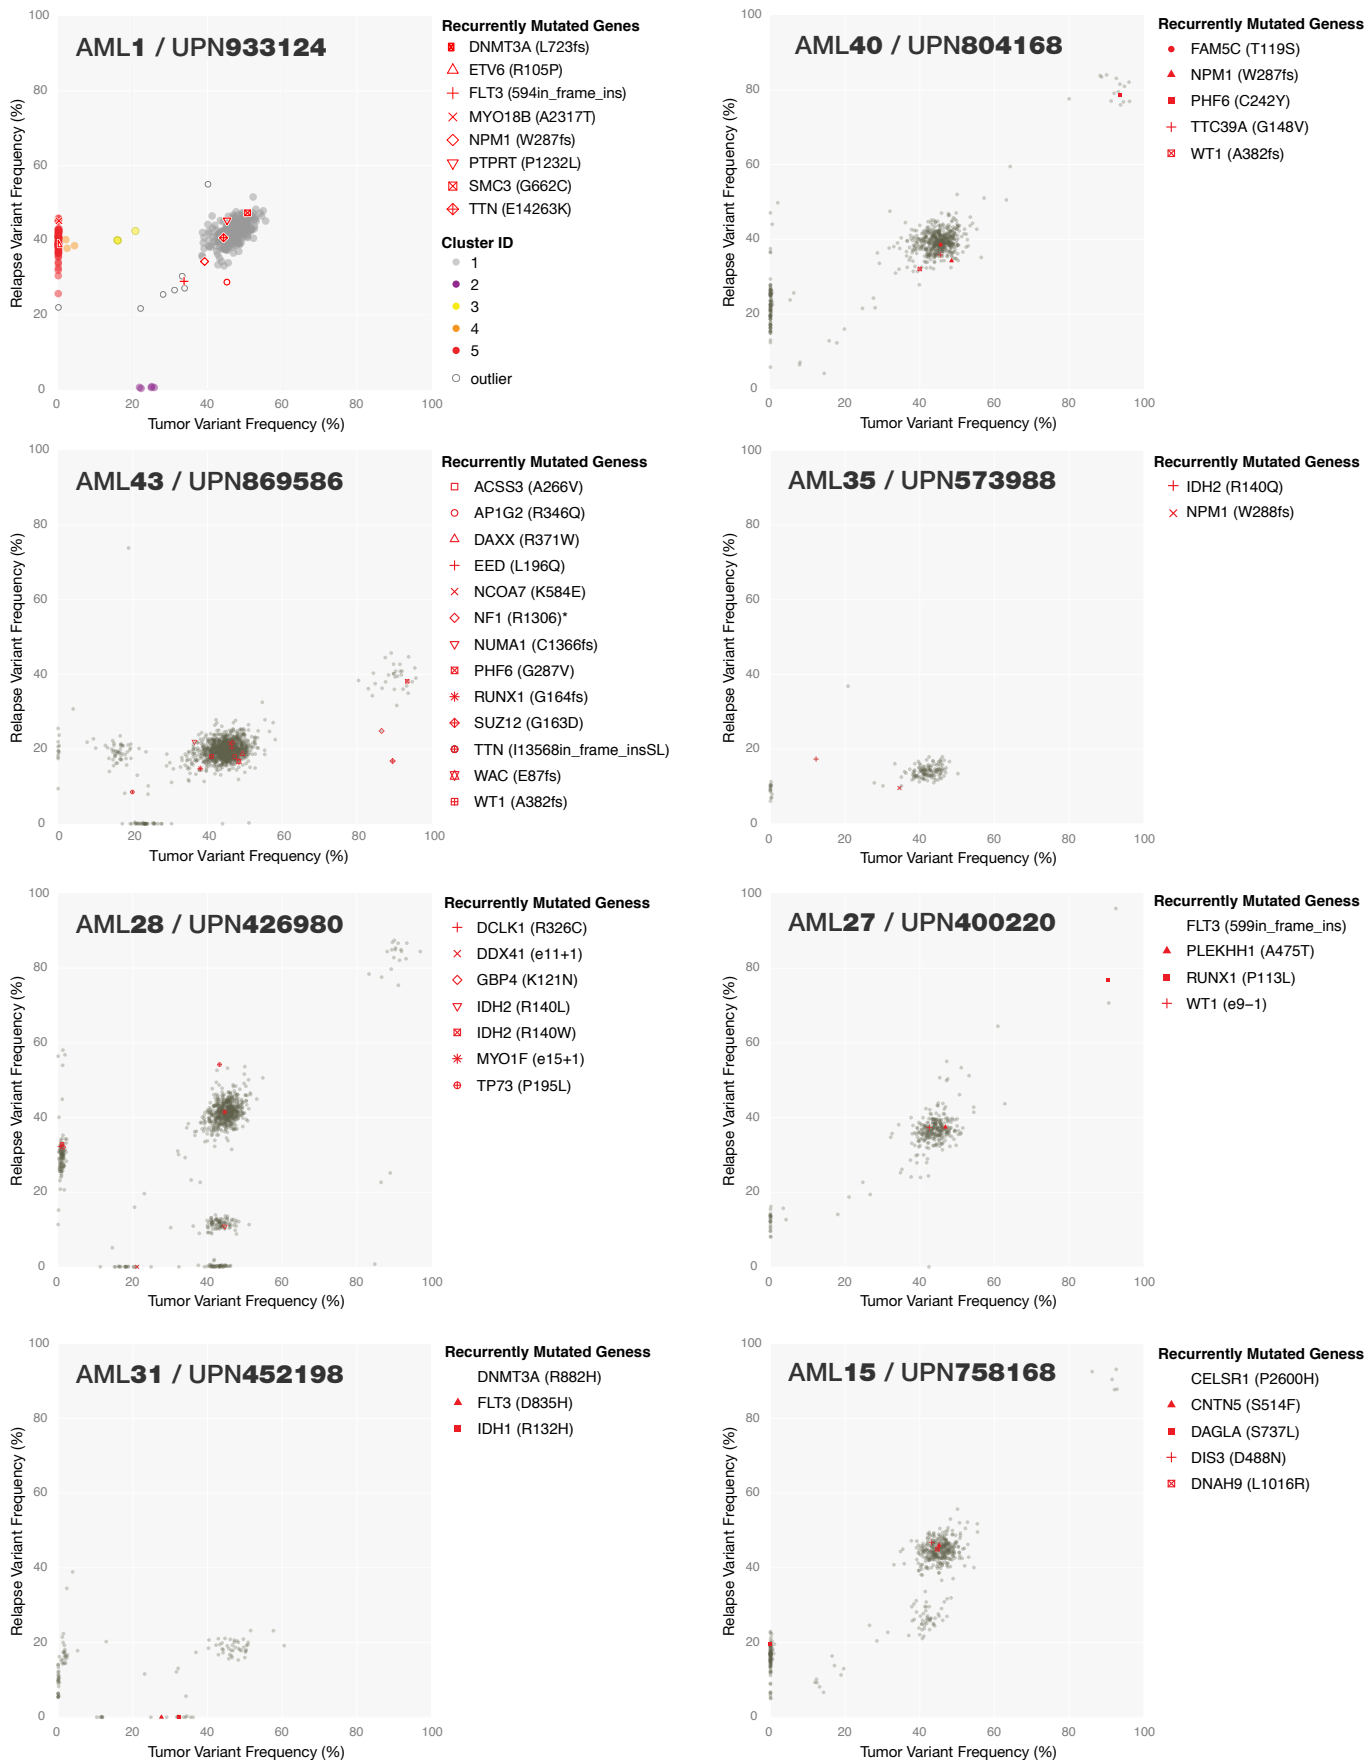

**Supplementary Figure 3.** Clonality scatterplots with gene annotations for 8 primary tumor and relapse pairs. Nonsynonymous mutations from recurrently mutated genes are highlighted in red.

Supplementary Figure 4

AML1 / UPN933124

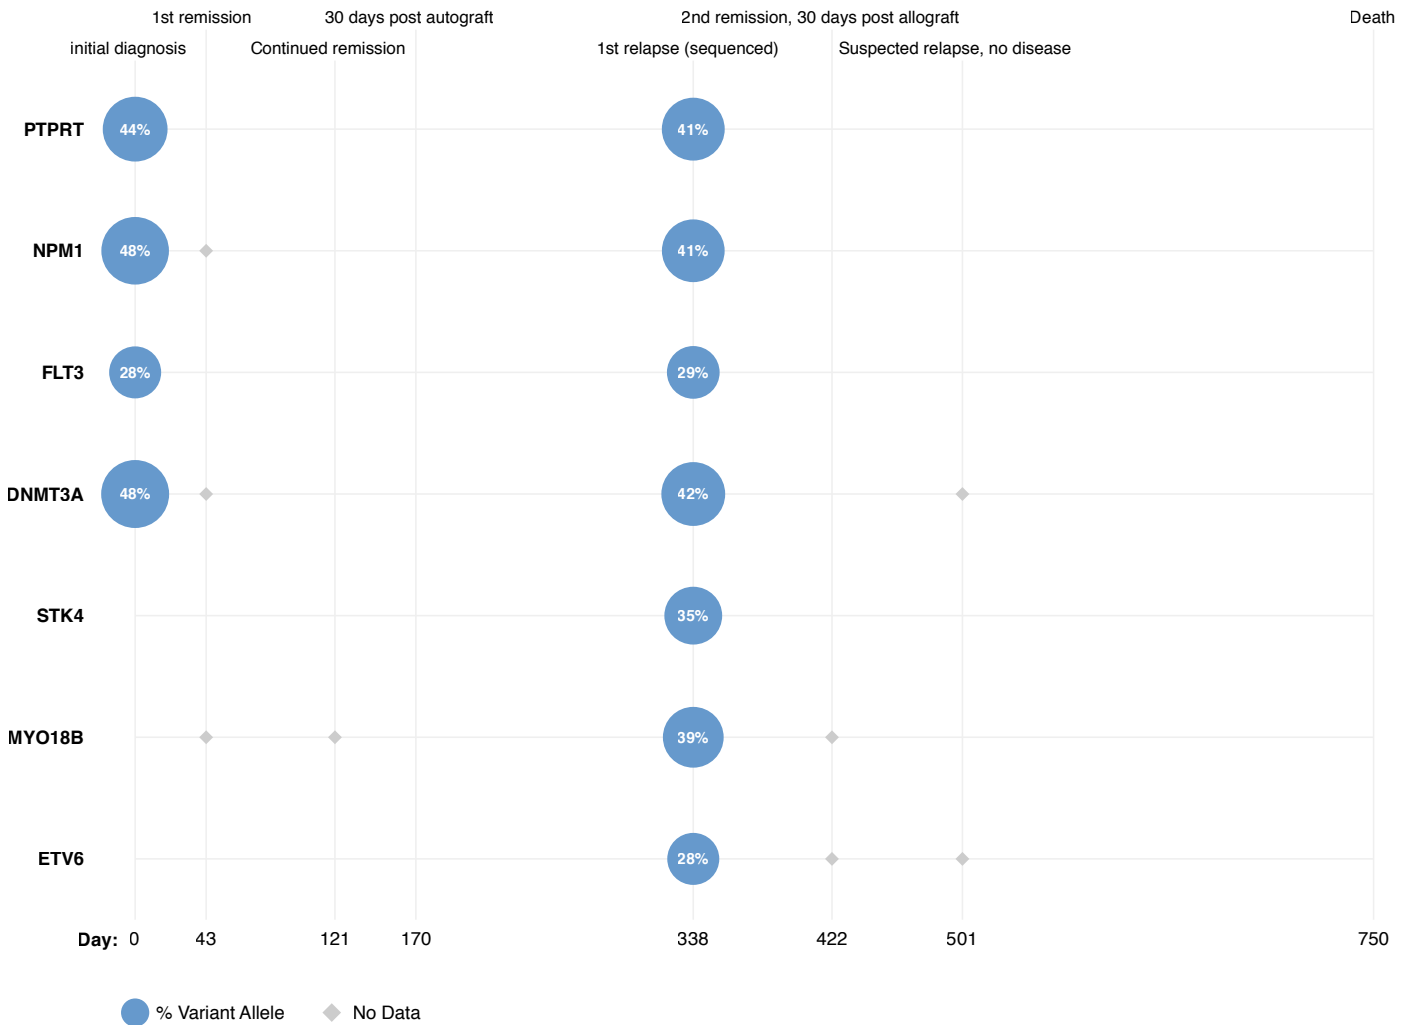

**Supplementary Figure 4.** Deep readcounts for key mutations in progressive samples from UPN 933124. Variant allele frequencies for disease-initiation mutations (*DNMT3A*, *NPM1*, *FLT3*, and *PTPRT*) and disease-progression mutations (*ETV6*, *MYO18B*, and *STK4*) were obtained by 454 sequencing of 7 bone marrow DNA samples collected during the course of disease progression. While some sites could not be amplified in intermediate time point samples due to limited FFPE DNAs, the average depth for sites that did amplify was very high (~8,500x). Only sites achieving 10x coverage or greater in a given sample are shown.

Supplementary Figure 5

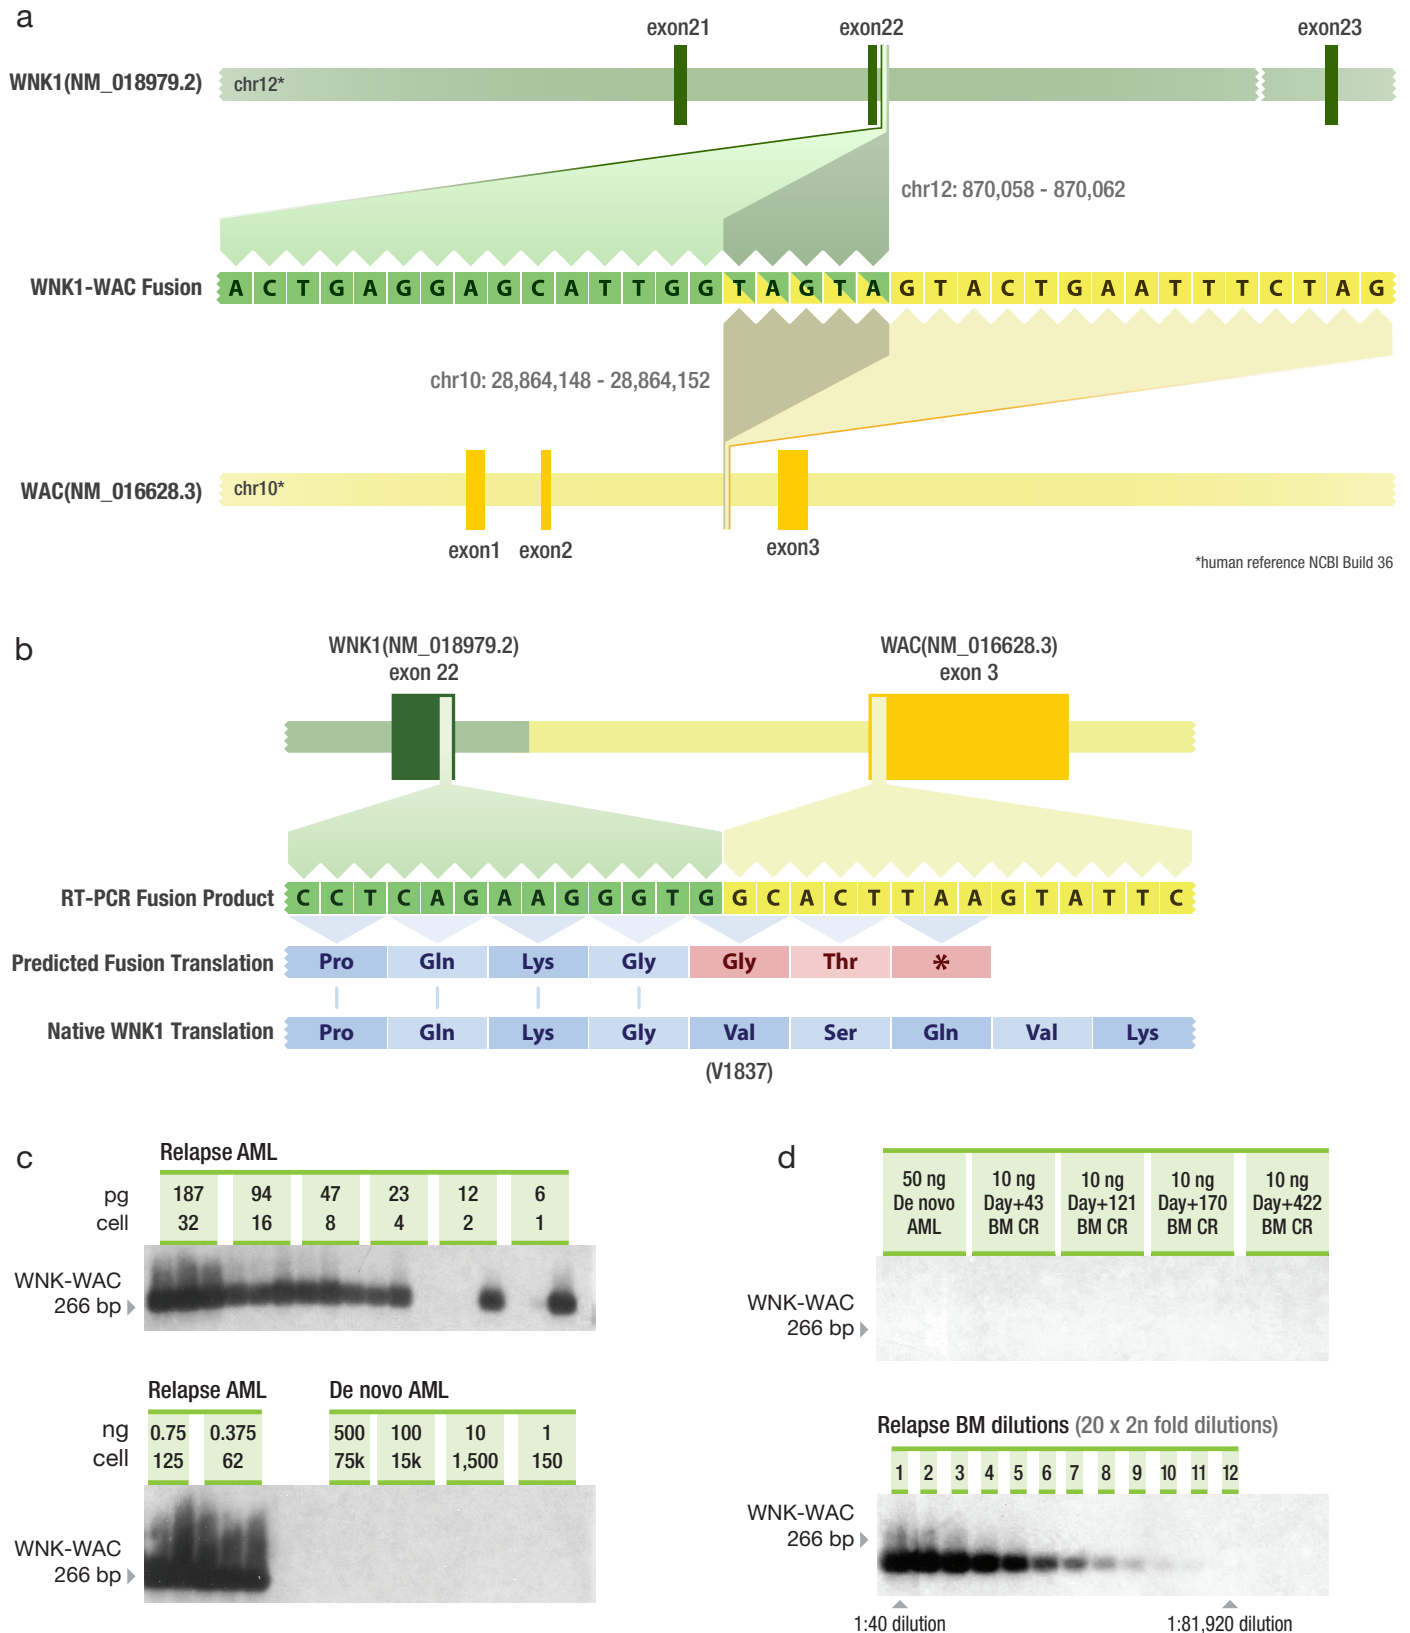

**Supplementary Figure 5. Relapse-specific t(10;12)(28864148;870062) translocation involving WNK1 and WAC genes in UPN 933124.** a) A graph of gene structures flanking Chromosome 10 (chr10: 28,864,148 - 28,864,152) and Chromosome 12 (chr12: 870,058 - 870,062) breakpoints in *WAC* and *WNK1* genes. The 5 base pairs (TAGTA) of microhomology at the breakpoints are highlighted in yellow and green mosaic squares. b) This translocation results in a 546 amino acid truncation of the *WNK1* protein with the introduction of two novel amino acids (Gly and Thr) at the

c-terminus of *WNK1*. No reciprocal translocation was identified by paired end reads. c) QPCR of the *WNK1-WAC* junctional fusion followed by Southern blot analysis. PCR amplification (40 cycles) was followed by *WNK1-WAC* verification by Southern blotting. Three independent serial dilutions of 1.5 ng of relapse AML WGA DNA and indicated concentrations of *de novo* AML genomic DNA. The two panels represent separate areas of the same Southern blot exposed for the same amount of time. Ct values for each PCR reaction and amplification of each sample using control primers are presented in Supplementary Figure 6. d) PCR amplification (40 cycles) with 1.5 ng relapse AML WGA DNA, 50 ng *de novo* AML WGA DNA, or 10 ng WGA DNA obtained from DNA extracted from bone marrow biopsy FFPE samples (during routine monitoring in complete remission prior to relapse) followed by Southern blotting. Amplifications were done in triplicate. Similar results were obtained with three independent WGA preparations from each FFPE sample. The two panels represent separate areas of the same Southern blot. Amplification results from these samples with control primers is presented in Supplemental Figure 6.

Supplementary Figure 6

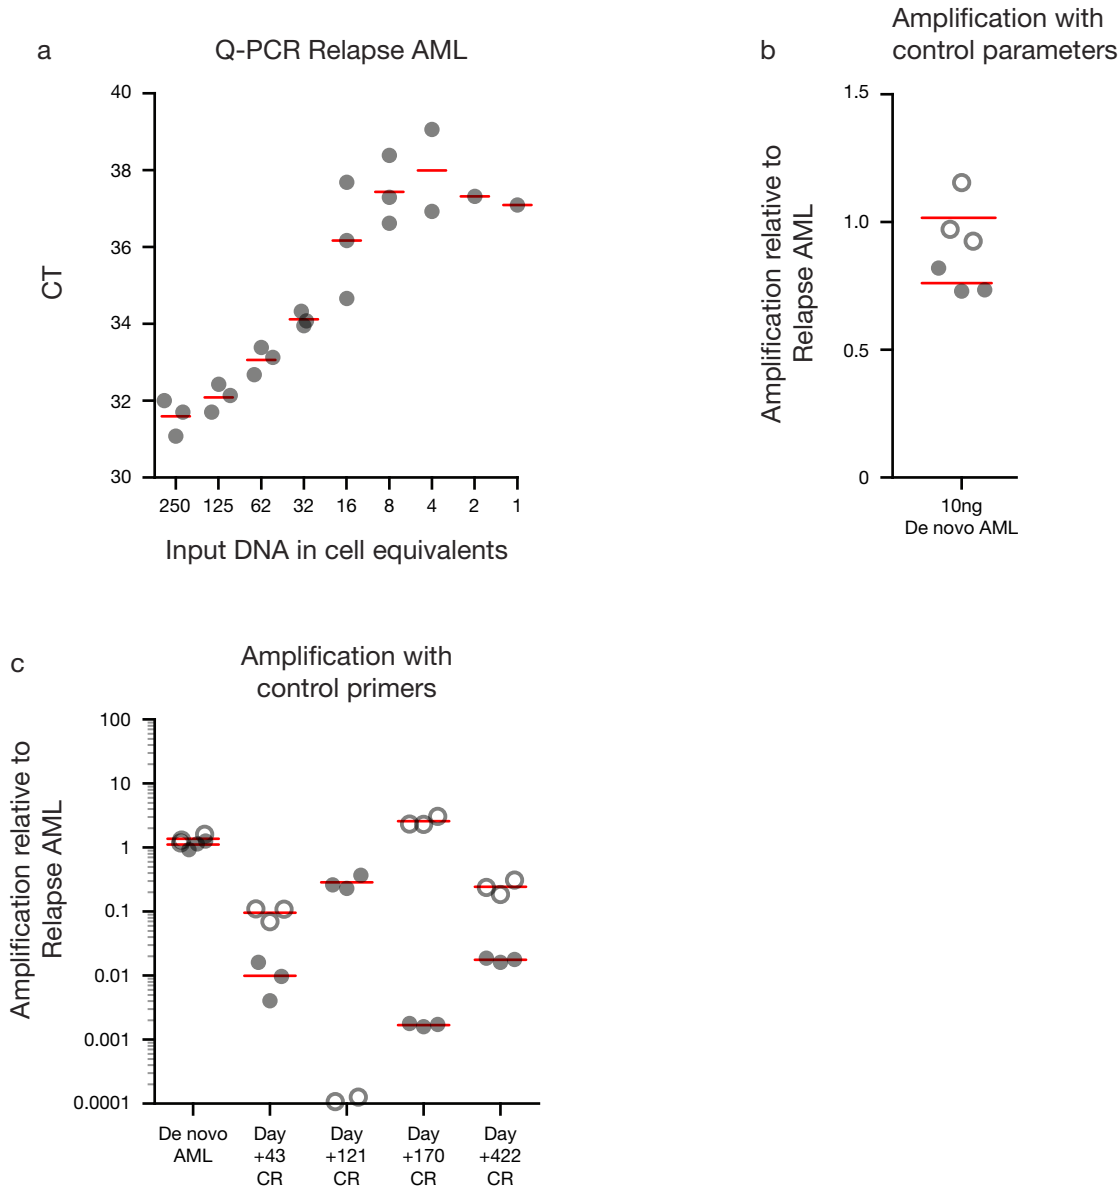

**Supplementary Figure 6.** qPCR of the *WNK1-WAC* junctional fusion followed by Southern blot analysis. a). Ct observed during qPCR of relapse AML WGA DNA from Figure 5c assessed by Sybr Green. b). Relative amplification of *de novo* AML genomic DNA compared with relapse AML WGA DNA using two control primer pairs in *WNK1*. PCR reactions used identical concentrations of DNA and were run concurrently with those shown in Supplementary Figure 5c. c). Relative amplification of DNA samples in Figure 5b compared with relapsed AML WGA DNA using two control primer pairs in *WNK1*. PCR reactions used identical concentrations of DNA and were run concurrently with those shown in Figure 5d. The Day +510 sample did not amplify with either primer pair and was removed from the PCR/Southern analysis.

Supplementary Figure 7

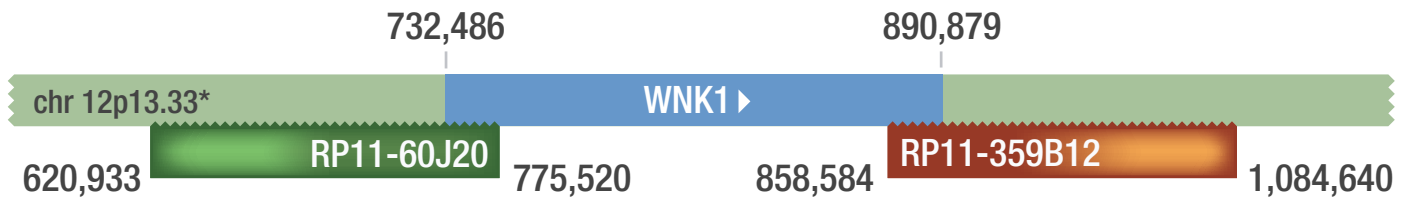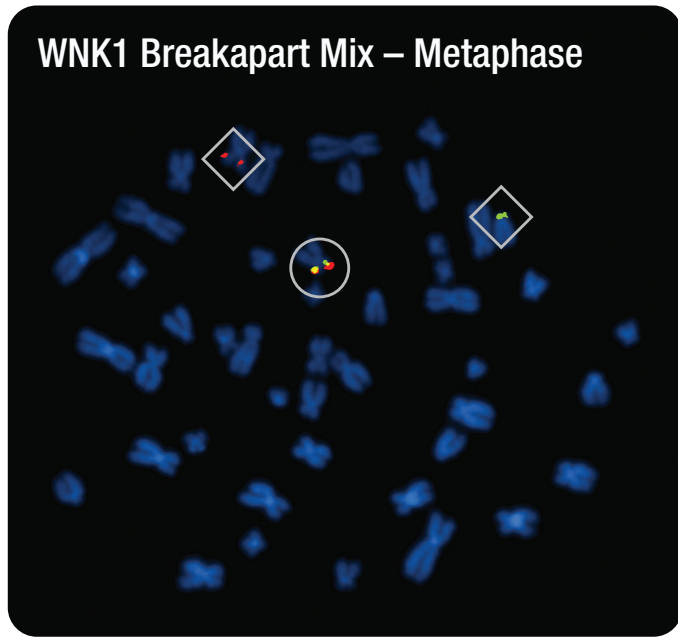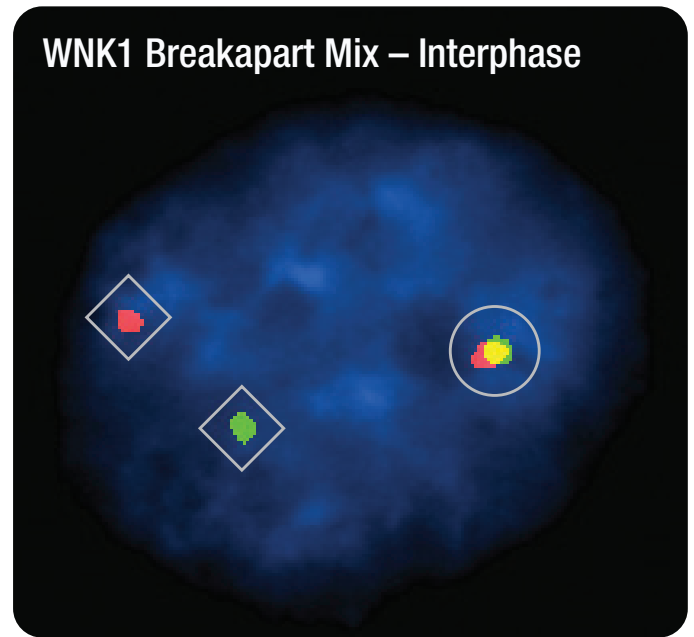

\*human reference NCBI Build 36

**Supplementary Figure 7.** Metaphase FISH images using a *WNK1* break-apart probe mix (Supplementary Information). RP11-60J20 was labeled green and RP11-359B12 was labeled red, both of which hybridize to the short arm of chromosome 12. These metaphase and interphase images display a break in the *WNK1* gene, indicative of rearrangement of *WNK1*.

Supplementary Figure 8

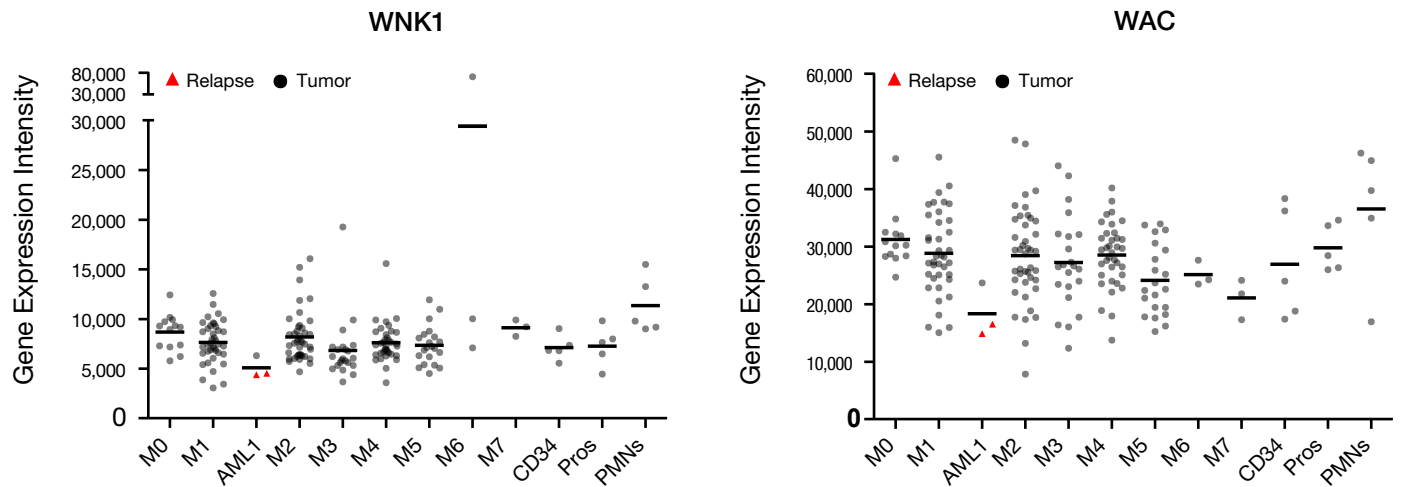

**Supplementary Figure 8.** Expression levels of *WNK1* and *WAC* genes in the *de novo* tumor, relapse, and 180 additional AML cases from 8 FAB subtypes reported in Ley et al. NEJM December 16, 20109. The most representative *WNK1* and *WAC* probe sets from the U133 Plus 2 array were used for plotting. Data from the *de novo* tumor and relapse is plotted independently. The black dots are from the *de novo* tumor and the red ones are from the relapse sample, performed in duplicate.

Supplementary Figure 9

AML1 Relapse RT-PCR WNK1:WAC fusion sequence

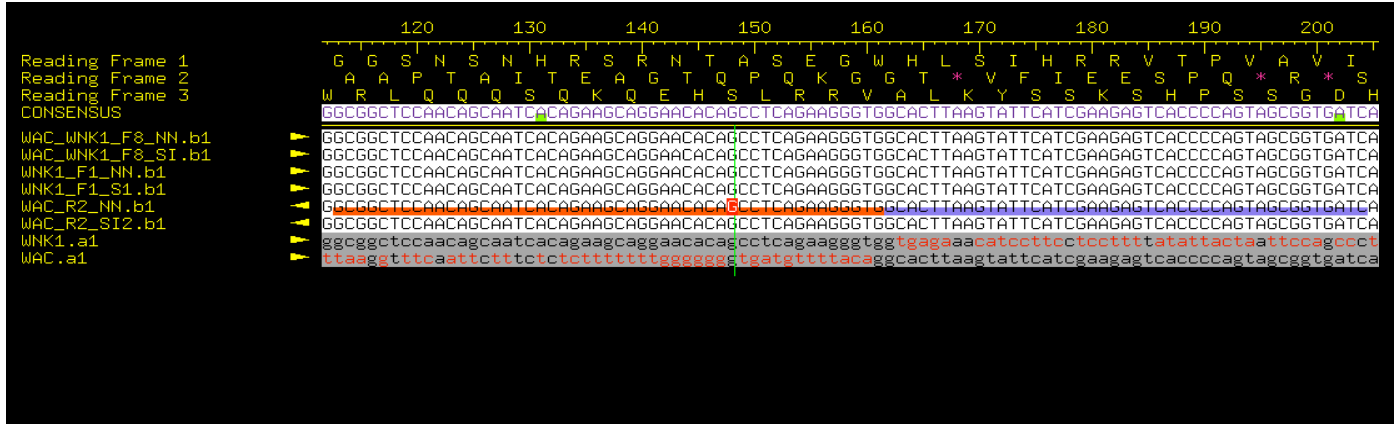

Red highlighted sequence is chr12; Build36 genomic positions: 12 + 869892 - 869940  
 Purple highlight sequence is chr10; Build36 genomic positions: 10 + 28864497 - 28864530

Translation sequence included as Reading Frames 1-3

WNK1.a1 = reference sequence from chr12 (red bases designate beginnings of divergence from chr12)  
 WAC.a1 = reference sequence from chr10 (red bases designate beginnings of divergence from chr10)

p.V1837fs\_GTX GGC-ACT-TAA  
 Fusion resides after WNK1 Exon22 and introduces a stop codon in WAC Exon3.

**Supplementary Figure 9.** Detection of the *WNK1-WAC* fusion gene in the relapse tumor sample. Transcript specific *WNK1* and *WAC* primer pairs were used to amplify and validate the *WNK1/WAC* fusion. RT-PCR products from relapse sample were sequenced using ABI 3730. The 3730 trace data is shown. Sequences from chromosome 12 were highlighted in red and sequences from chromosome 10 are highlighted in purple.



Supplementary Figure 10

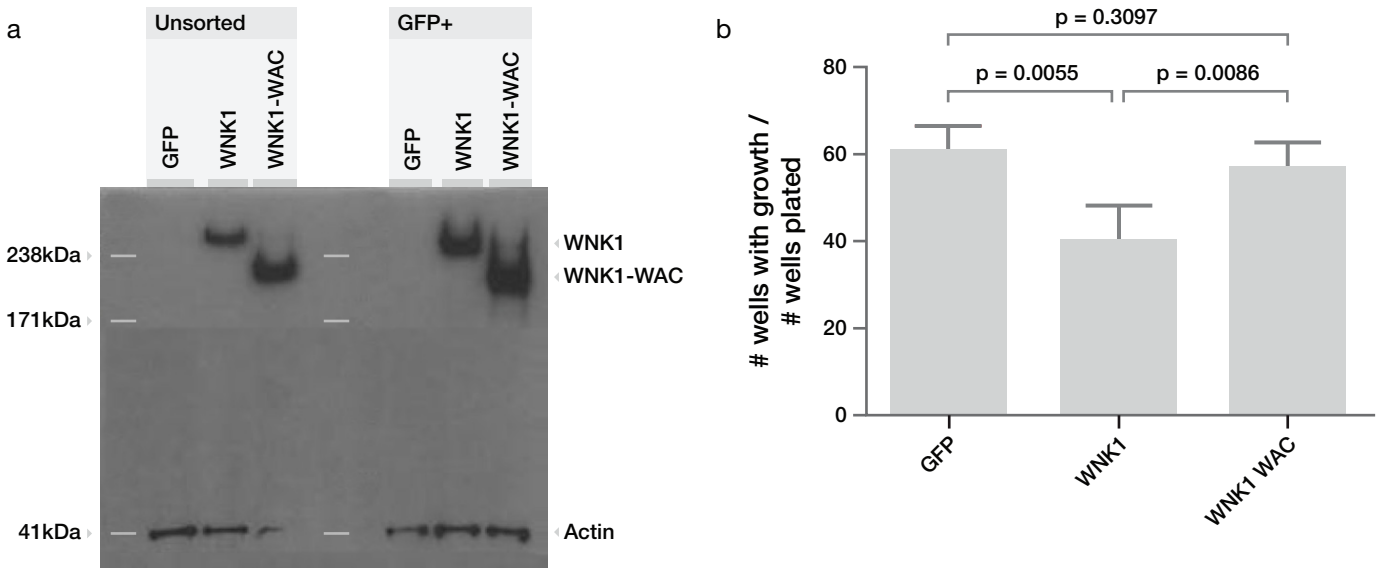

**Supplementary Figure 10.** Stable and transient expression of *WNK* and *WNK/WAC* in K562 cells. K562 cells were cultured to a density of  $1 \times 10^6$  cells/mL and nucleofected (Lonza, Kit V, Program T-16) with 2 (stable) or 5 (transient)  $\mu$ g of empty MSCV, MSCV-*WNK* or MSCV-*WNK wac* plasmids, all containing an IRES-GFP cassette. Rat *WNK1* cDNA in the pcDNA3.1 (-) vector was kindly provided by Richard Lifton. Full length *WNK1* was cloned out of the vector by PCR with primers to insert a Kozak sequence (Forward 5' GAATTCGCCGC-CACCATGTCTGACGGCACCAGAGAAAGCAGAGC 3'; Reverse 5' CTCGAGGCCTAAGCGTAATCTGGAA-CATCATATGGGTAGGTG 3'). To create the *WNK/WAC* fusion the 8 bp of *WAC* were added to the reverse primer (Forward – same as above, Reverse 5' GCCTCGAG-GCTTAAGTGCCACCCTTCTGAGGTTCACTTCT-GCTTCTGTAAGT 3'). After sequencing, both PCR products were cloned as EcoR1/Xho1 fragments into an MSCV IRES-GFP vector (empty vector control shown as 'IRES GFP' in the figure).

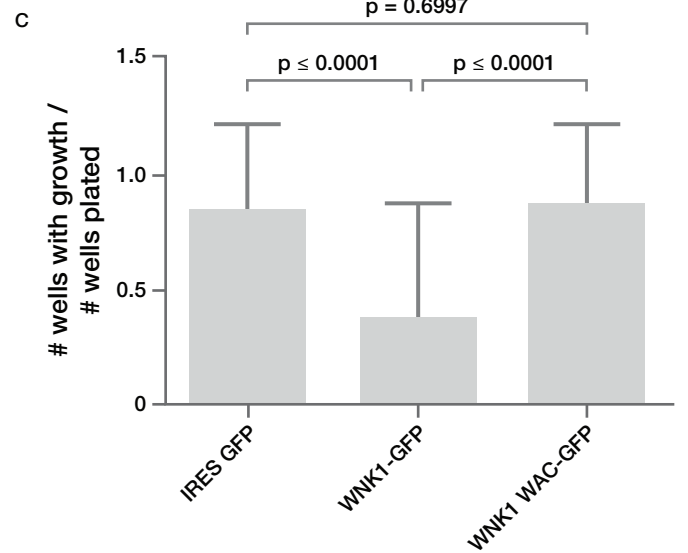

a) Western blot analysis of transiently transfected K562 cells. Cells were sorted (MoFlo) 48 hours post-transfection. "Unsorted" samples were sorted for live cells as high FSC vs. high SSC; "GFP +" cells were sorted by high FSC vs. high SSC and GFP positivity. Western blots were probed with anti-*WNK* primary antibody (1:200 dilution; R&D Systems, AF2849) and HRP-conjugated rabbit anti-goat IgG secondary antibody (1:10,000 dilution; Santa Cruz, sc2768). Anti-actin primary antibody (1:2,000 dilution; Millipore, mab1501) with HRP-conjugated rabbit anti-mouse IgG secondary antibody (1:10,000 dilution; GE NXA931) was used as a loading control. b) Cloning efficiency of transiently transfected cells. Cells were sorted as in a) for "GFP +" as single cells into at least 2 96-well plates. Cells were allowed to grow for 3 weeks and then wells were visually scored for wells containing viable cells. Data is from 2 independent transfections. P-values shown are based on two-tailed t tests. c) Cloning efficiency of stably transfected cells. Transfected cells were cultured for 2 weeks without selection then GFP positive cells from each construct were single cell sorted (MoFlo) into 3 96-well plates. Cells were allowed to grow for 2 weeks post-sort and visually scored for growth as in b).

Supplementary Figure 11

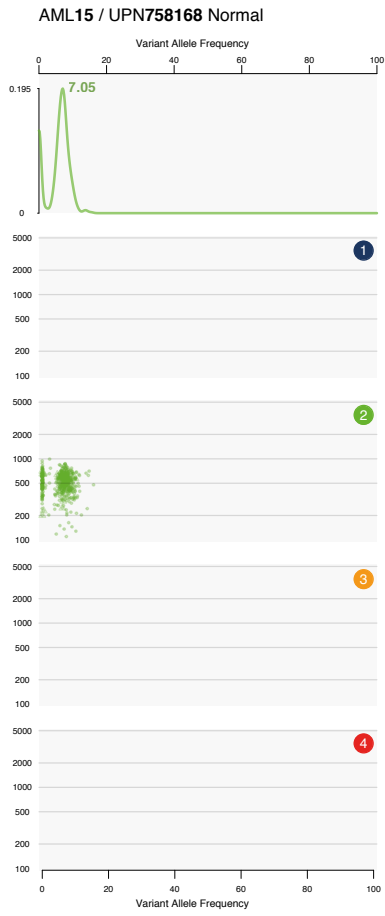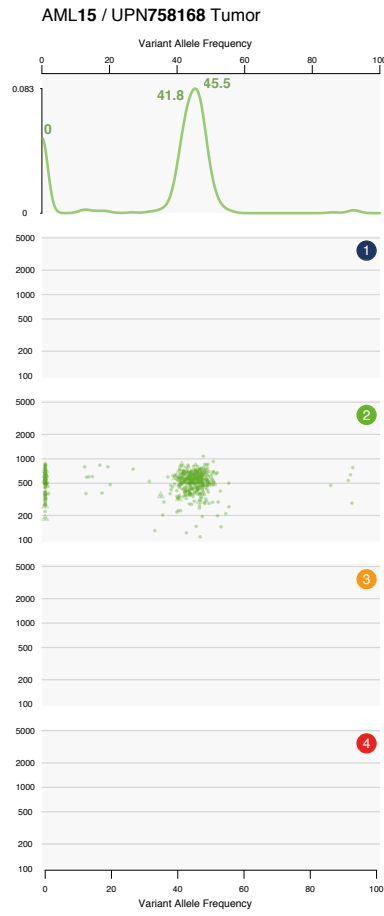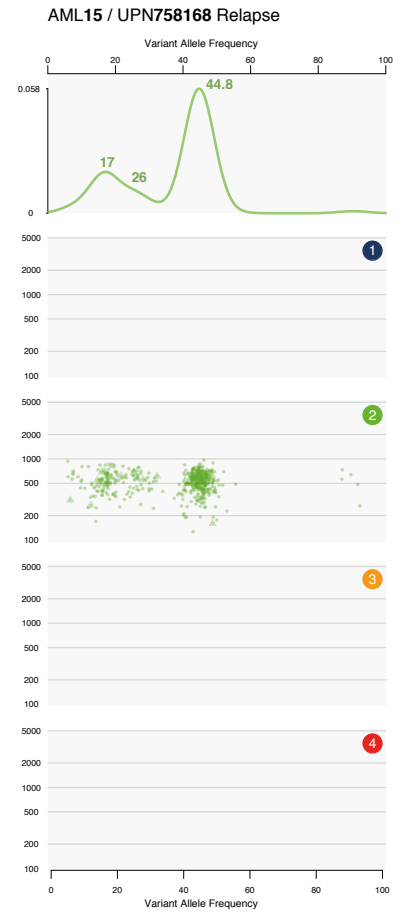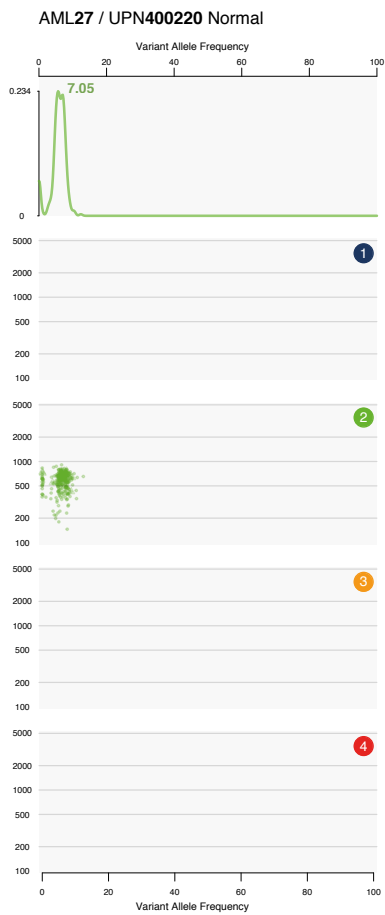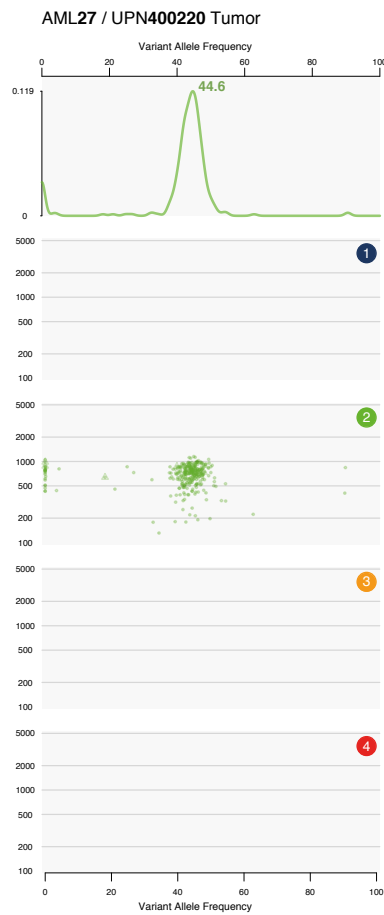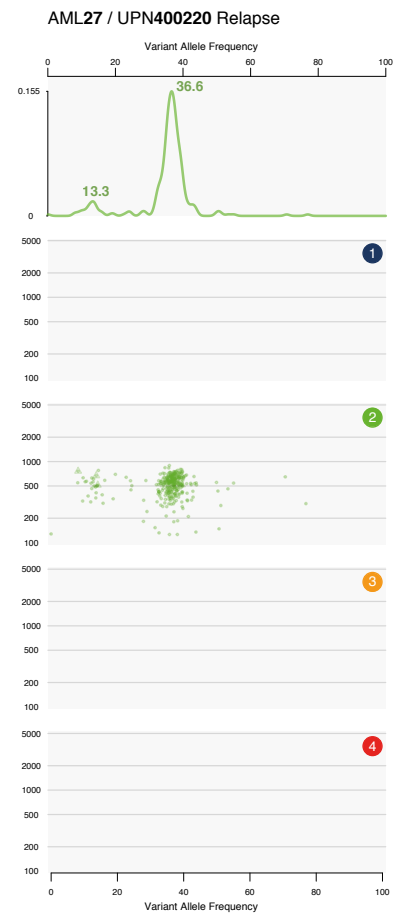

Supplementary Figure 11

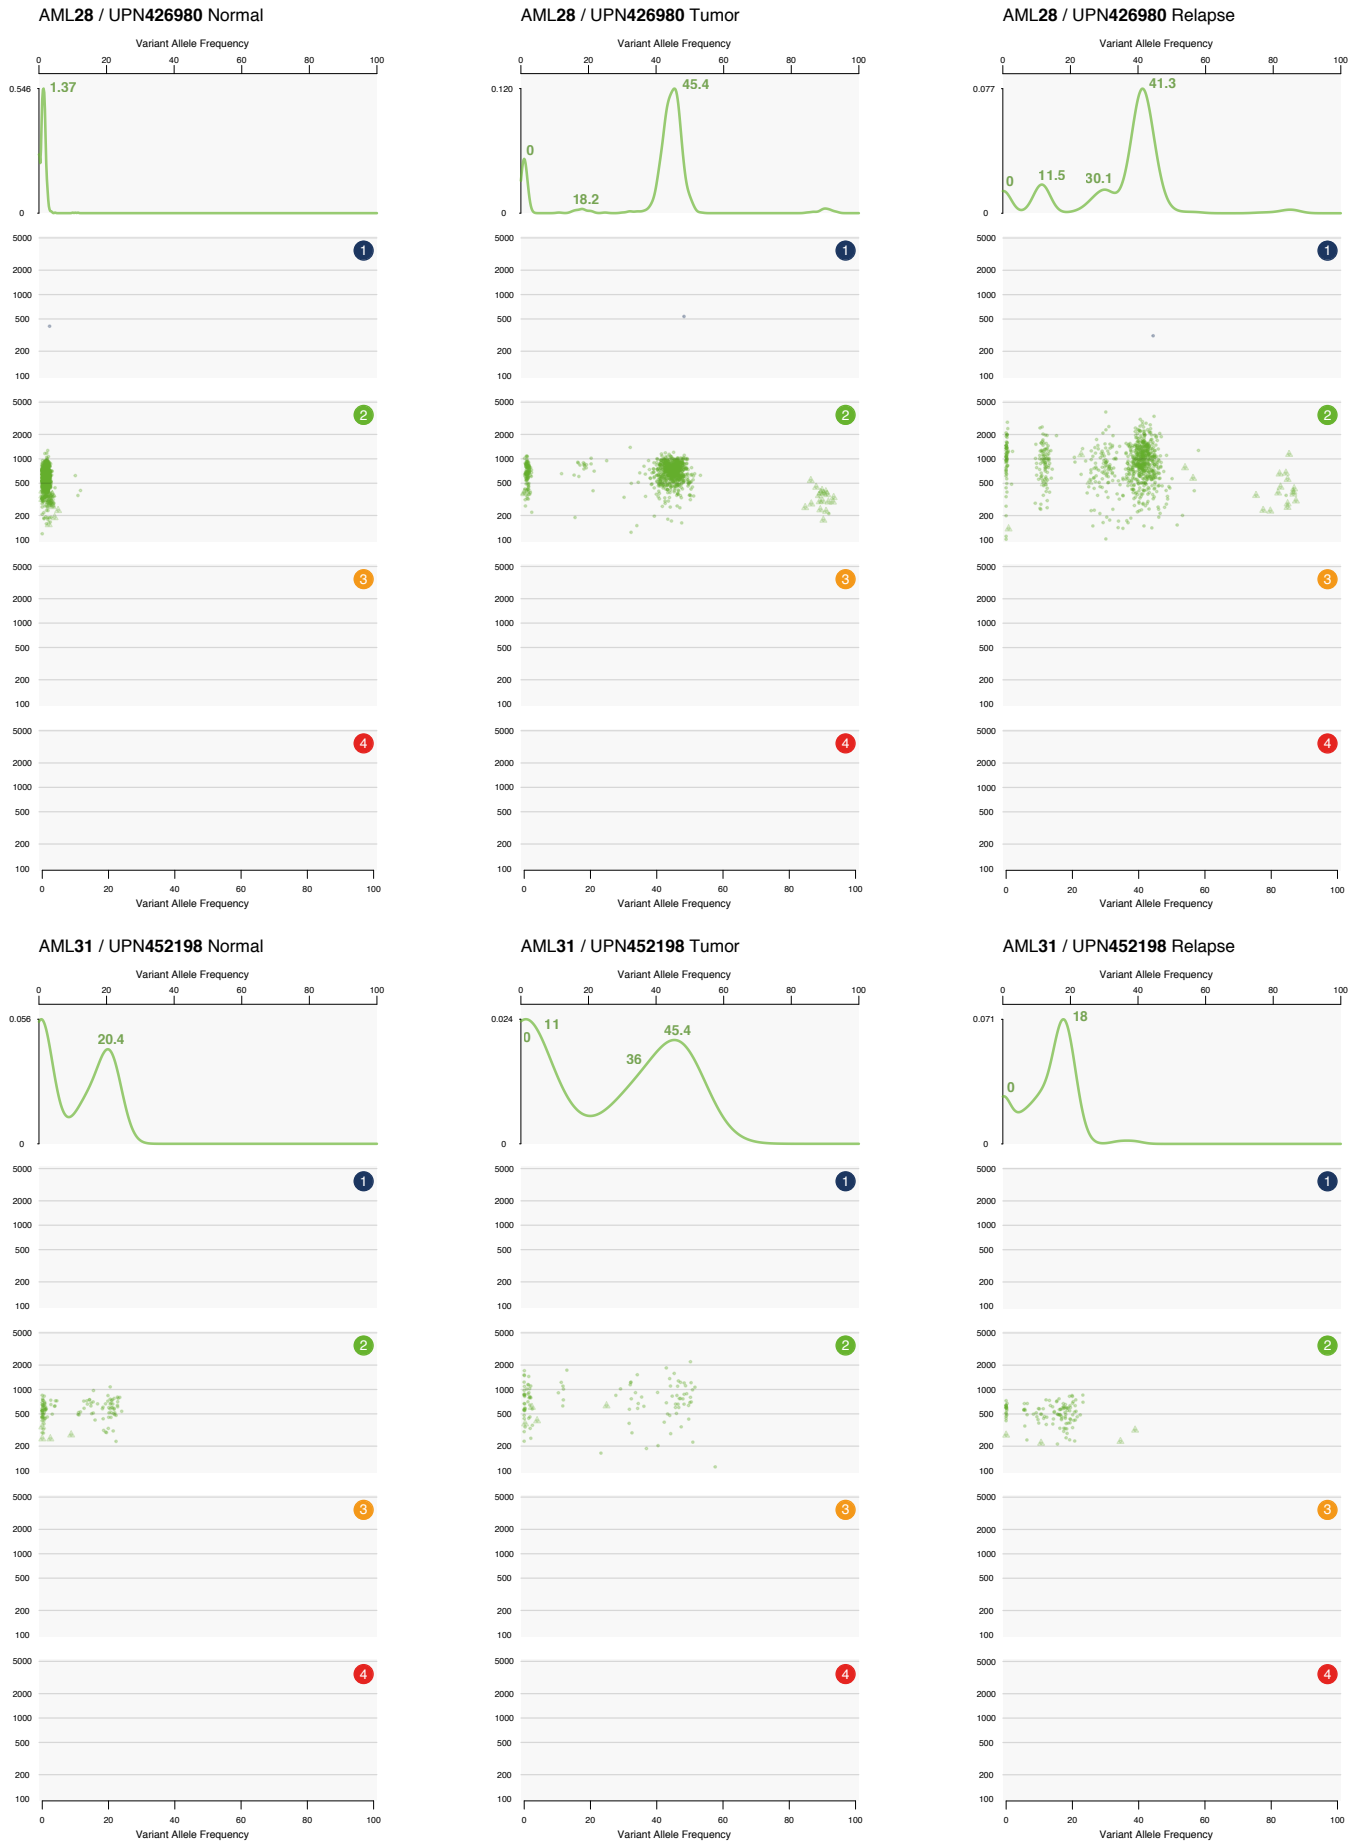

Supplementary Figure 11

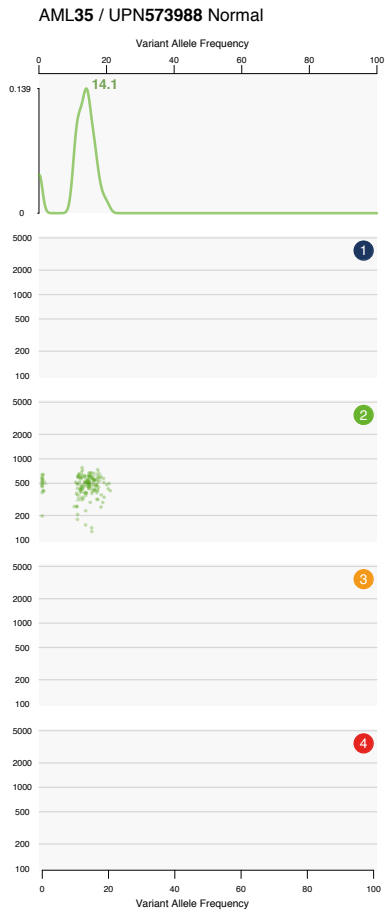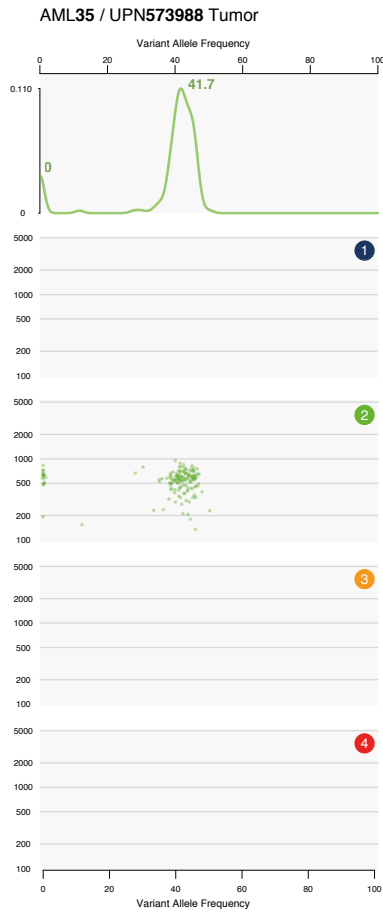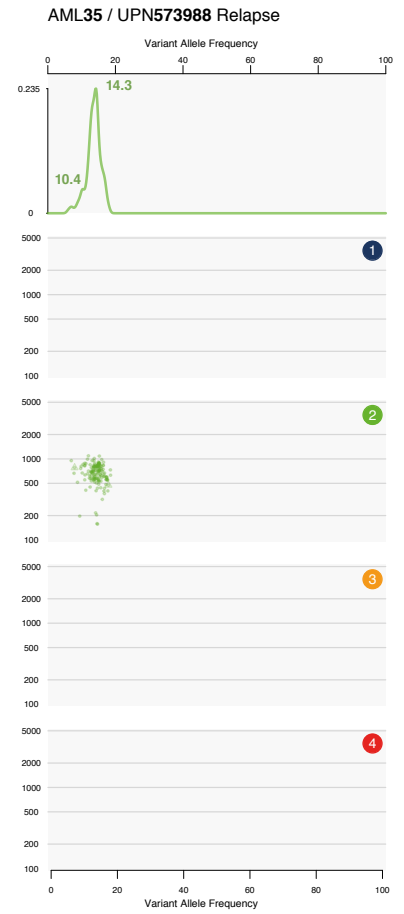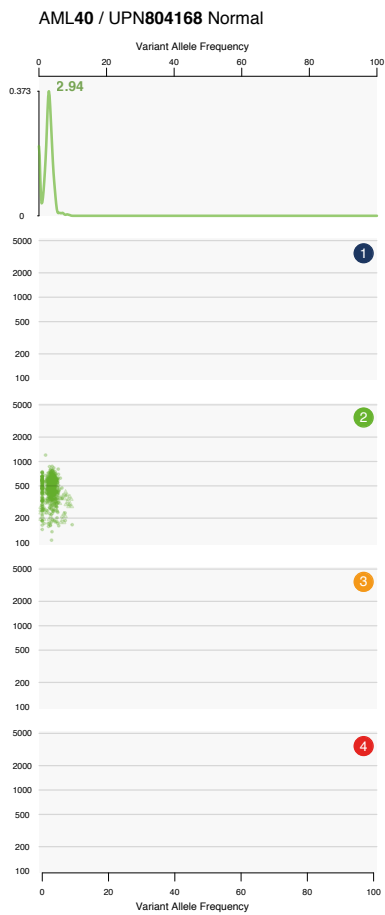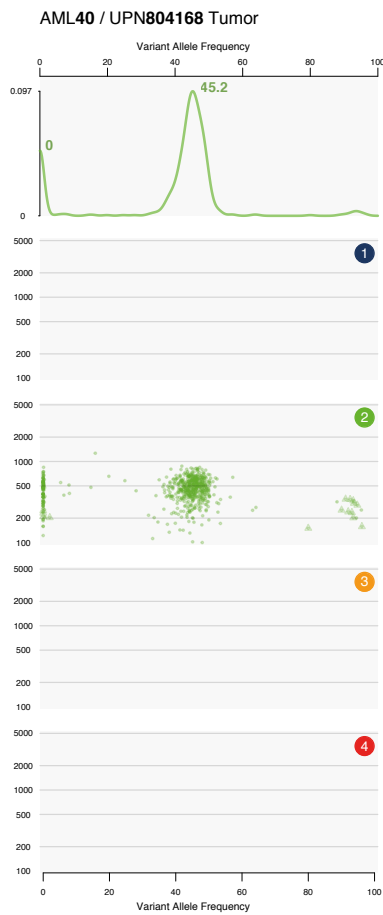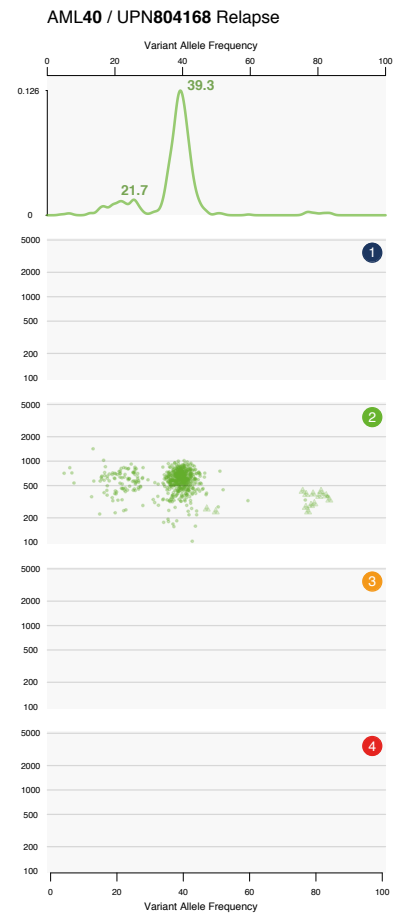

Supplementary Figure 11

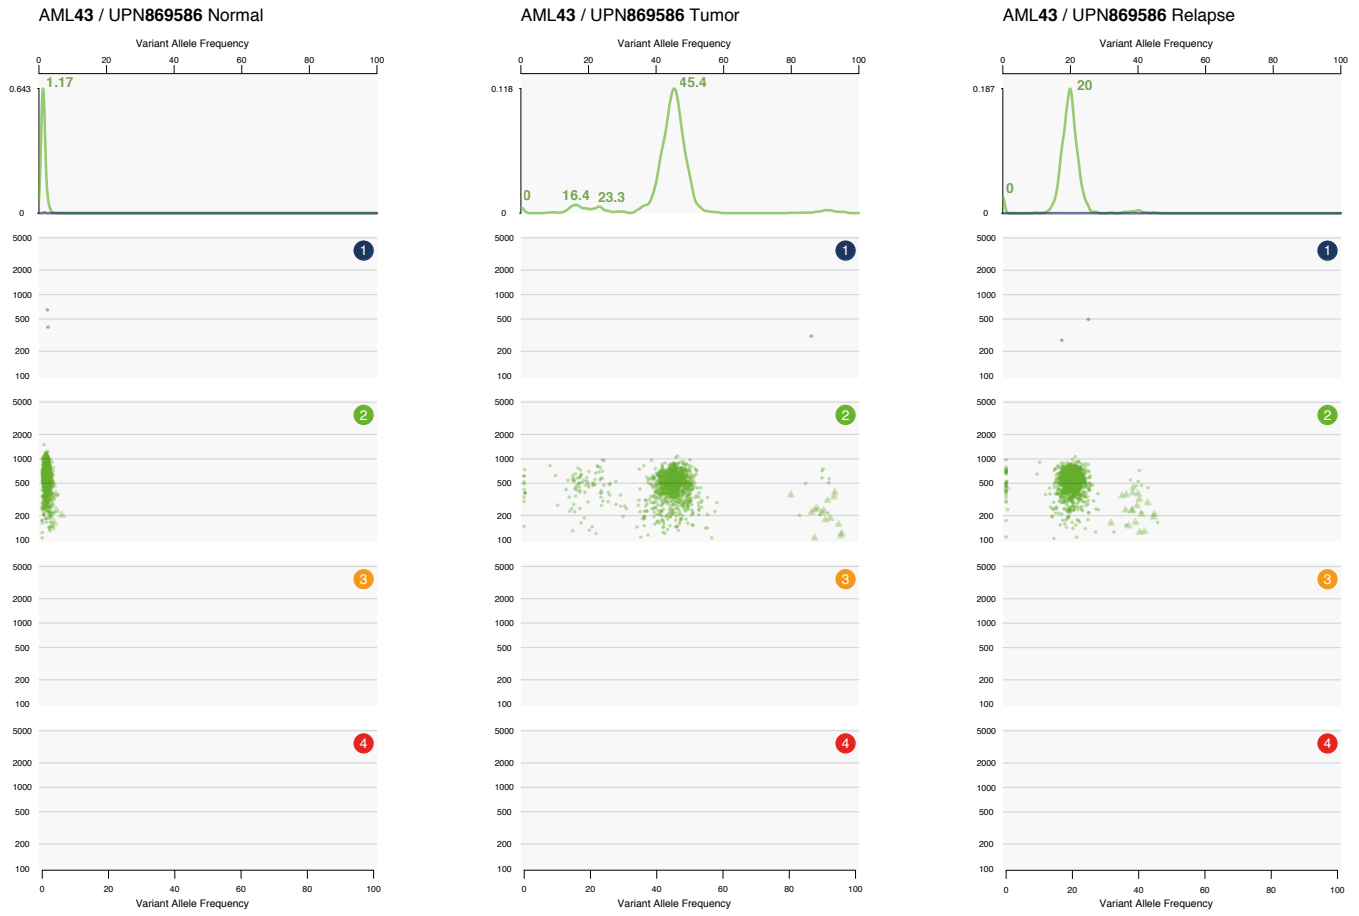

**Supplementary Figure 11.** Kernel density estimation of subclones in 7 primary tumor and relapse pairs. Five plots are shown for each sample: kernel density (top), followed by plots of tumor variant allele frequency by sequence depth for four copy number bins (labeled as 1, 2, 3, and 4+). Triangle represents mutation from X chromosome.

Supplementary Figure 12

AML1 / UPN993124 relapse vs normal

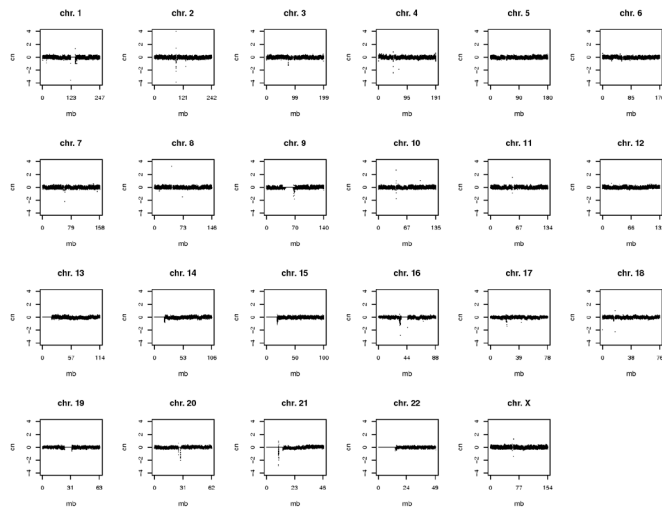

AML1 / UPN993124 relapse vs tumor

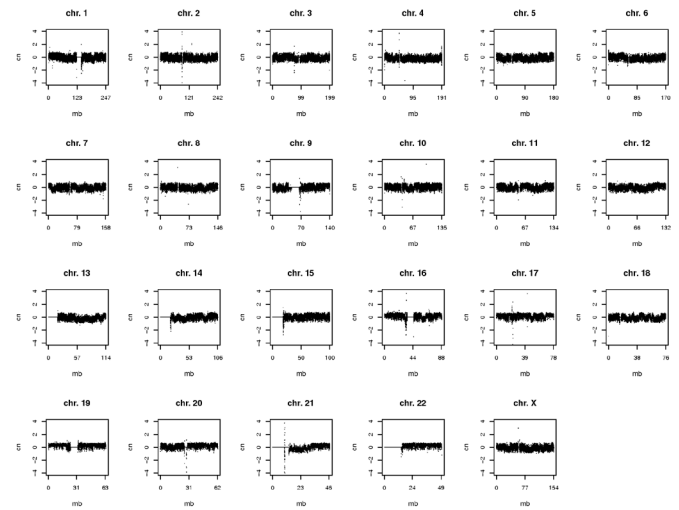

AML15 / UPN758168 relapse vs normal

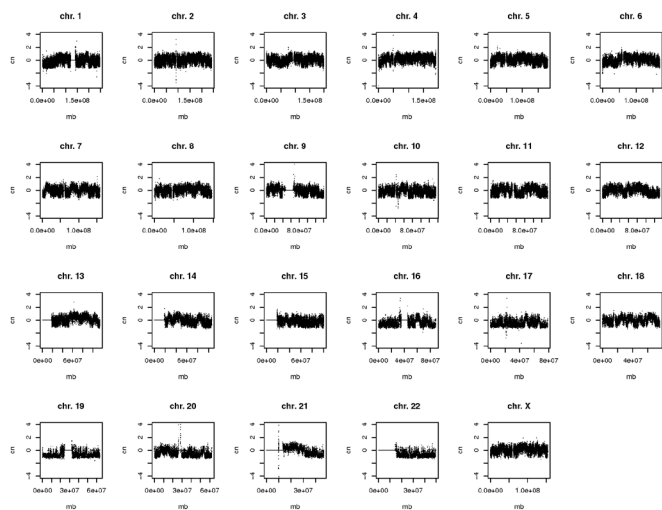

AML15 / UPN758168 relapse vs tumor

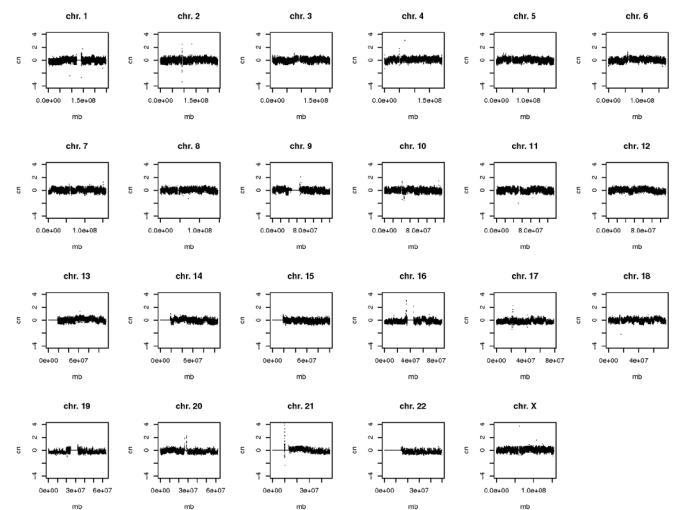

AML27 / UPN400220 relapse vs normal

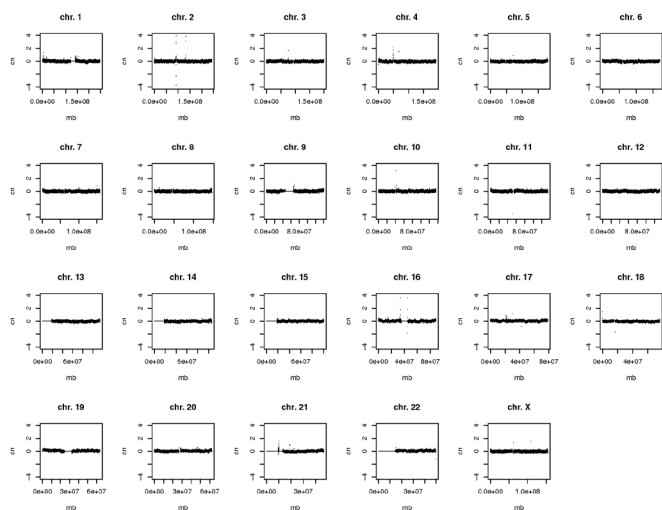

AML27 / UPN400220 relapse vs tumor

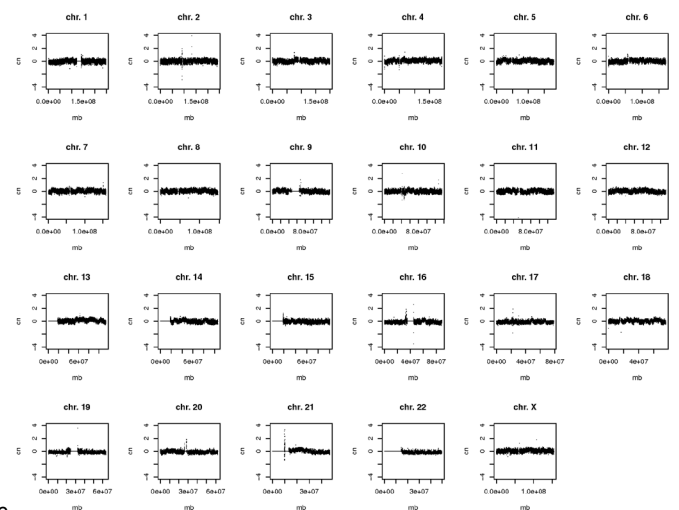

Supplementary Figure 12

AML28 / UPN426980 relapse vs normal

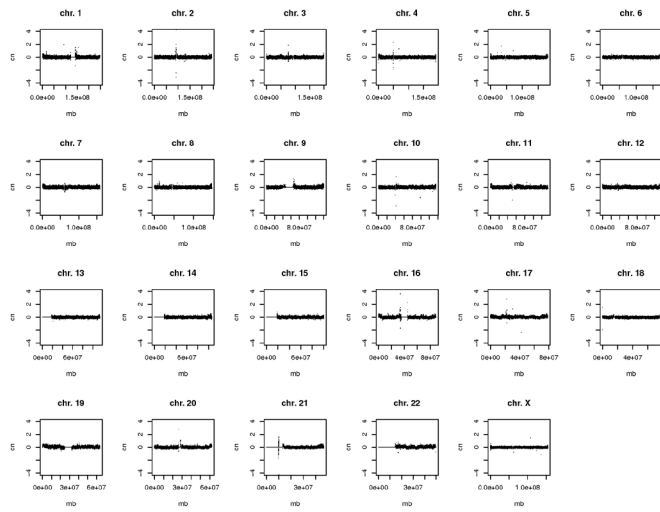

AML28 / UPN426980 relapse vs tumor

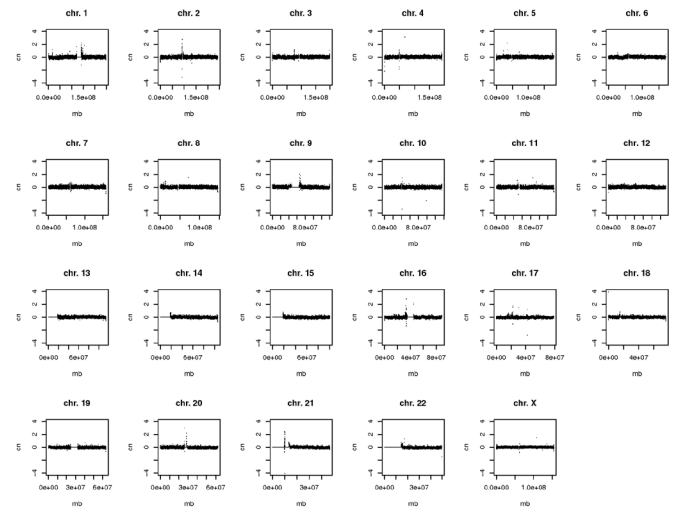

AML31 / UPN452198 relapse vs normal

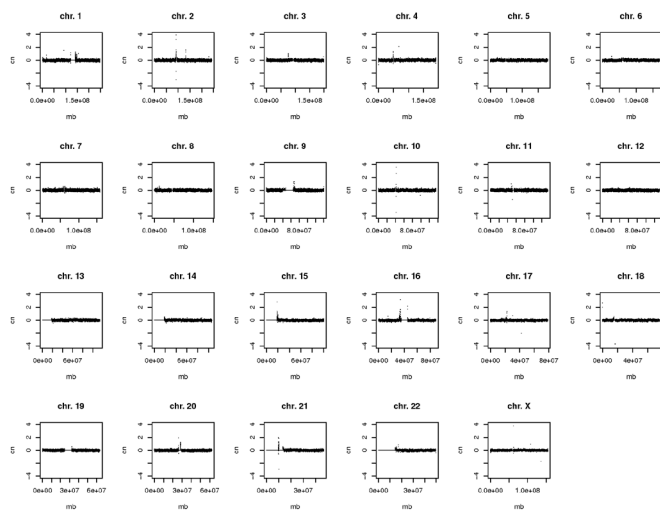

AML31 / UPN452198 relapse vs tumor

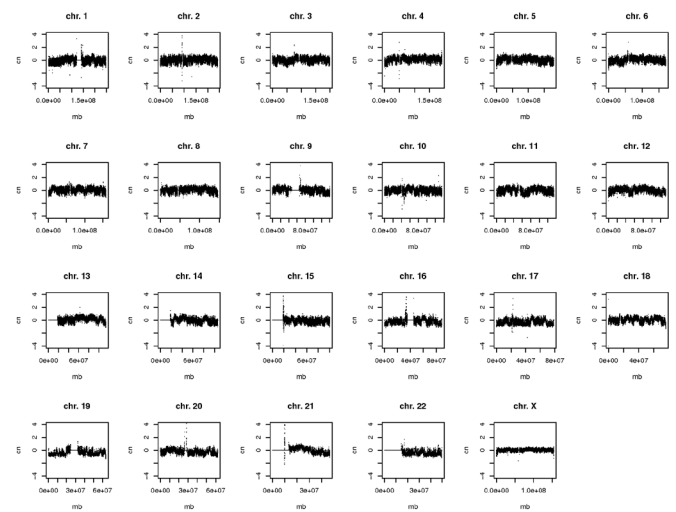

AML35 / UPN573988 relapse vs normal

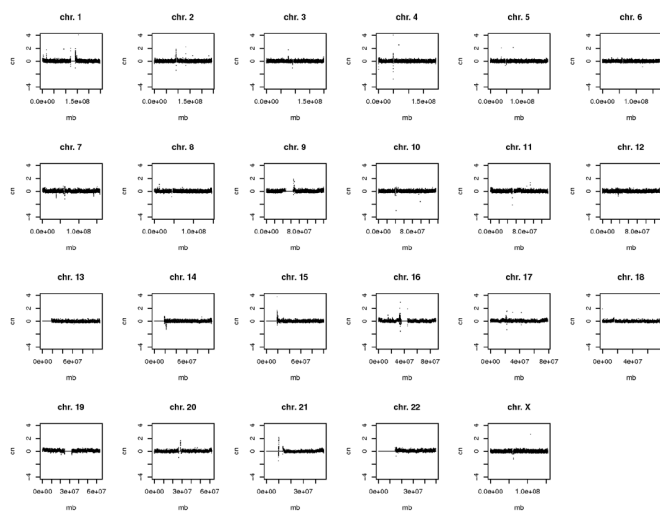

AML35 / UPN573988 relapse vs tumor

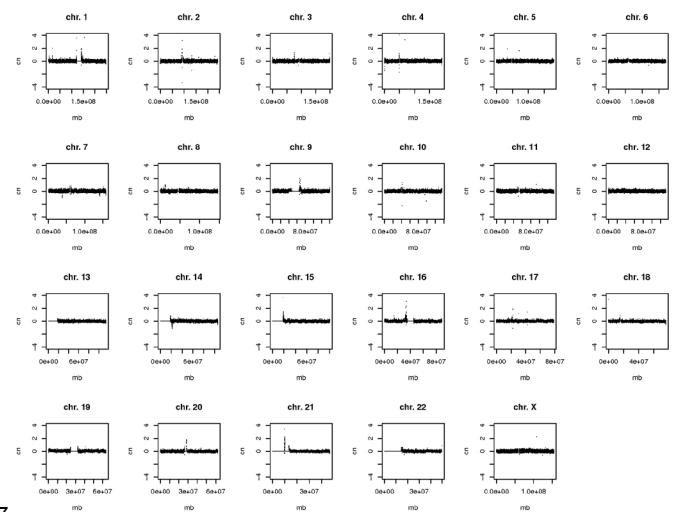

Supplementary Figure 12

AML40 / UPN804168 relapse vs normal

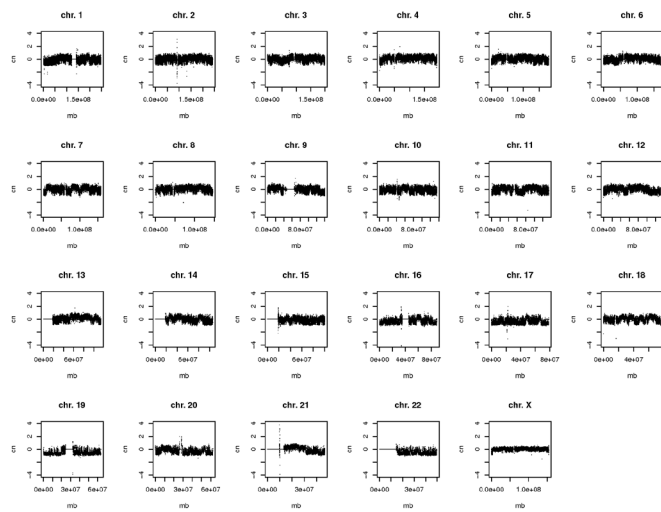

AML40 / UPN804168 relapse vs tumor

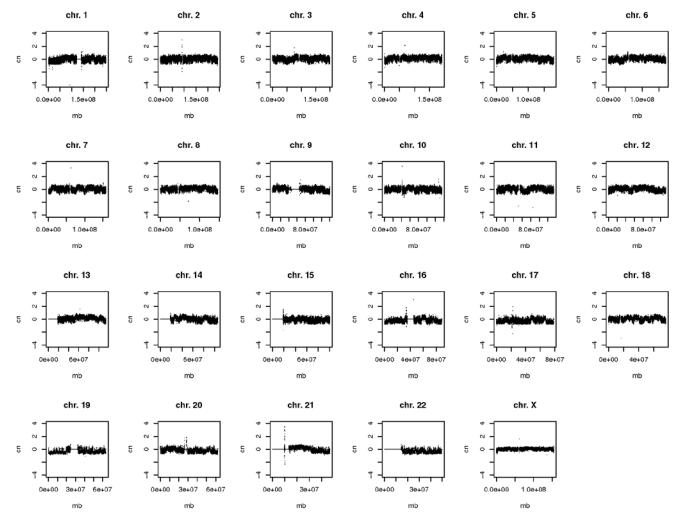

AML43 / UPN869586 relapse vs normal

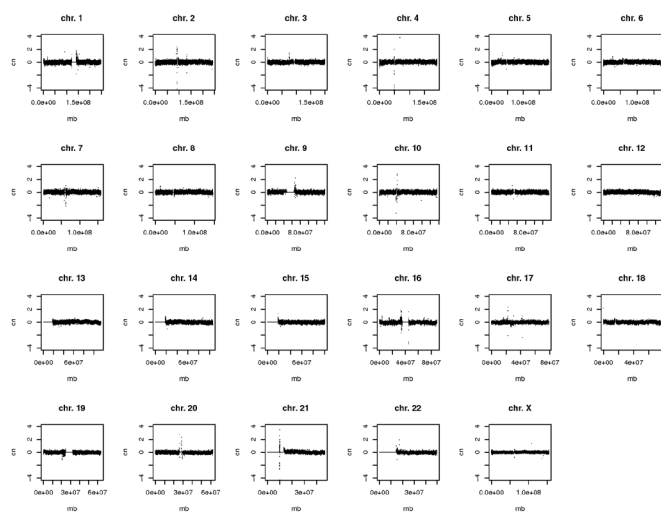

AML43 / UPN869586 relapse vs tumor

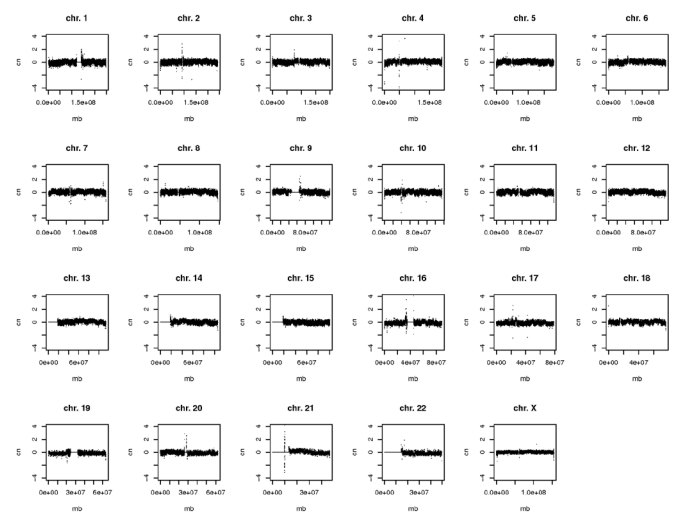

Supplementary Figure 12. Copy number landscape for the primary tumor and relapse samples for the 8 AML patients.



## Supplementary Tables

**Supplementary Table 1.** Haploid and diploid coverages for normal, primary tumor, and relapse samples from 8 AML cases.

| ID    | UPN    | Type    | Sample Name          | Haploid Coverage | Sequenced Kilobases | Heterozygous SNP concordance (%) |
|-------|--------|---------|----------------------|------------------|---------------------|----------------------------------|
| AML1  | 933124 | Normal  | H_GV-933124G-S.9017  | 26.203           | 98,618,377          | 99.71                            |
| AML1  | 933124 | Relapse | H_GV-933124G-S.17384 | 34.158           | 116,351,939         | 99.86                            |
| AML1  | 933124 | Tumor   | H_GV-933124G-S.9043  | 28.058           | 102823346           | 99.73                            |
| AML15 | 758168 | normal  | H_KA-758168-S.22139  | 25.322           | 94,587,302          | 97.16                            |
| AML15 | 758168 | relapse | H_KA-758168-0912815  | 26.741           | 130,327,761         | 99.58                            |
| AML15 | 758168 | tumor   | H_KA-758168-0816987  | 28.841           | 102,684,539         | 99.44                            |
| AML27 | 400220 | normal  | H_KA-400220-0802127  | 28.282           | 108,973,221         | 99.62                            |
| AML27 | 400220 | relapse | H_KA-400220-0912813  | 33.867           | 140,098,694         | 99.78                            |
| AML27 | 400220 | tumor   | H_KA-400220-0814727  | 31.791           | 104,743,936         | 99.70                            |
| AML28 | 426980 | normal  | H_KA-426980-S.14770  | 29.125           | 115,598,195         | 99.52                            |
| AML28 | 426980 | relapse | H_KA-426980-0912807  | 31.528           | 116,656,787         | 99.65                            |
| AML28 | 426980 | tumor   | H_KA-426980-S.15631  | 26.684           | 98,629,314          | 99.53                            |
| AML31 | 452198 | normal  | H_KA-452198-S.22477  | 31.956           | 140,742,228         | 99.64                            |
| AML31 | 452198 | relapse | H_KA-452198-0912806  | 38.425           | 152,932,430         | 99.74                            |
| AML31 | 452198 | tumor   | H_KA-452198-0814719  | 24.876           | 89,784,635          | 99.46                            |
| AML35 | 573988 | normal  | H_KA-573988-0815176  | 37.795           | 125,860,910         | 99.74                            |
| AML35 | 573988 | relapse | H_KA-573988-0926957  | 34.482           | 130,758,235         | 99.80                            |
| AML35 | 573988 | tumor   | H_KA-573988-0814941  | 33.397           | 110,602,908         | 99.77                            |

|       |        |         |                      |        |             |       |
|-------|--------|---------|----------------------|--------|-------------|-------|
| AML40 | 804168 | normal  | H_KA-804168-0802136  | 28.404 | 92,084,078  | 99.68 |
| AML40 | 804168 | relapse | H_KA-804168-0912812  | 36.245 | 146,986,837 | 99.81 |
| AML40 | 804168 | tumor   | H_KA-804168-0814948  | 26.938 | 86,887,308  | 99.65 |
| AML43 | 869586 | normal  | H_KA-869586G-S.16508 | 28.991 | 108,320,784 | 99.52 |
| AML43 | 869586 | relapse | H_KA-869586G-0926998 | 30.318 | 133,794,242 | 99.77 |
| AML43 | 869586 | tumor   | H_KA-869586G-S.16427 | 30.709 | 106,243,864 | 99.58 |

---

**Supplementary Table 2a.** Clinical summaries.

| UPN    | Sex | Race | FAB | Age | Time to relapse in days | %BM Blasts/primary | Cytogenetics/primary | %BM Blasts/relapse | Cytogenetics/relapse  | OS months   | Induction | Consolidation |
|--------|-----|------|-----|-----|-------------------------|--------------------|----------------------|--------------------|-----------------------|-------------|-----------|---------------|
| 452198 | M   | W    | M5  | 55  | 505                     | 97                 | Normal               | 20                 | normal                | 56+ (alive) | 7+3I      | HDAC          |
| 573988 | F   | W    | M4  | 67  | 365                     | 75                 | Normal               | 54                 | normal (4 metaphases) | 20.5        | 7+3I      | 5+2I          |
| 804168 | M   | W    | M1  | 53  | 235                     | 86                 | Normal               | 81                 | complex               | 30.0        | 7+3D+3E   | HDAC          |
| 933124 | F   | W    | M1  | 57  | 338                     | 100                | Normal               | 78                 | t(10;12)              | 24.6        | 7+3D+3E   | HDAC+E+AutoTx |
| 400220 | F   | W    | M4  | 34  | 252                     | 71                 | Normal               | 60                 | normal                | 10.7        | 7+3I      | HDAC          |
| 426980 | M   | W    | M2  | 68  | 805                     | 64                 | Normal               | 12                 | normal                | 46.8        | 7+3D      | HDAC          |
| 758168 | F   | W    | M3  | 25  | 961                     | 93                 | t(15;17)             | 92                 | t(15;17)              | 49.8        | 7+3D+ATRA | Arsenic/Mito  |
| 869586 | M   | W    | M4  | 23  | 235                     | 51                 | Normal               | 54                 | normal (3 metaphases) | 19.0        | 7+3D+3E   | HDAC+E+AutoTx |

I=idarubicin, D=daunorubicin, E=etoposide, Arsenic=arsenic trioxide and M=mitoxantrone.

HDAC= High dose cytarabine.

7+3= 7 days of standard dose cytarabine and 3 days of an anthracycline.

7+3+3= the same, plus 3 days of etoposide.

5+2= 5 days of standard dose cytarabine and 2 days of anthracycline.

AutoTx= autologous stem cell transplantation.

Time to relapse refers to the time between the original diagnostic tissue banking (usually within 24 hours of starting therapy) and the time to the banking the relapse sample.

**Supplementary Table 2b.** Clinical data, cytogenetics, and key known mutations for the 8 AML patients in this study.

| UPN    | Sex | Race | FAB | %BM Blast | WBC   | %PB Blast | Cytogenetics primary        | Cytogenetics relapse                                                 | Prior MDS | Previous tumor                                       | EFS months (3.31-'10) | Days from collection to first Relapse | OS months (3.31-'10) | ATRA | Hydroxyurea | day 0    | day -1   | day -2 | day -3 | DNMT3A   | FLT3    | IDH1    | IDH2    | KRAS | NPM1     | NRAS | TET2 |   |
|--------|-----|------|-----|-----------|-------|-----------|-----------------------------|----------------------------------------------------------------------|-----------|------------------------------------------------------|-----------------------|---------------------------------------|----------------------|------|-------------|----------|----------|--------|--------|----------|---------|---------|---------|------|----------|------|------|---|
| 400220 | F   | W    | M4  | 71        | 19.6  | 58        | 46,XX[20]                   | 46,XX[20]                                                            | N         | early stage cervical, surgery, 11 years prior to AML | 8.3                   | 252                                   | 10.7                 | N    | N           | 0        | 0        | 0      | 0      | -        | ITD     | -       | -       | -    | -        | -    | -    | - |
| 426980 | M   | W    | M2  | 64        | 5.5   | 48        | 46,XY[20]                   | 46,XY[19]                                                            | N         |                                                      | 26.2                  | 795                                   | 46.8                 | N    | N           | 0        | 0        | 0      | 0      | -        | -       | -       | p.R140L | -    | -        | -    | -    | - |
| 452198 | M   | W    | M5  | 97        | 72.6  | 8         | 46,XY[15]                   | 46,XY[20]                                                            | N         |                                                      | 16.6                  | 505                                   | 41.4                 | N    | N           | 0        | 0        | 0      | 0      | p.R882H  | p.D835H | p.R132H | -       | -    | p.W288fs | -    | -    |   |
| 573988 | F   | W    | M4  | 75        | 15.2  | 10        | 46,XX[16]                   | 46,XX[4]                                                             | N         |                                                      | 12                    | 365                                   | 20.5                 | N    | N           | 0        | 0        | 0      | 0      | -        | -       | -       | p.R140Q | -    | p.W288fs | -    | -    |   |
| 758168 | F   | W    | M3  | 93        | 16.3  | 40        | 46,XX,t(15;17)(q22;q21)[20] | 46,XX,t(15;17)(q22;q21.1)[13]/46,XX[7]                               | N         |                                                      | 31.6                  | 961                                   | 43.4                 | Y    | N           | 0        | 90mg     | 0      | 0      | -        | -       | -       | -       | -    | -        | -    | -    | - |
| 804168 | M   | W    | M1  | 86        | 88.1  | 52        | 46,XX[20]                   | 46,Y,t(X;6)(q22;q23),?t(1;12;17;3)(p36.1,q13;p11.2;p21)[17]/46,XY[3] | N         |                                                      | 7.7                   | 235                                   | 30                   | N    | Y           | 1gm x1   | 1gm x1   | 0      | 0      | -        | ITD     | -       | -       | -    | p.W288fs | -    | -    |   |
| 869586 | M   | W    | M4  | 51        | 27.1  | 63        | 46,XY[20]                   | 46,XY[3]                                                             | N         |                                                      | 7.7                   | 235                                   | 19                   | N    | N           | 0        | 0        | 0      | 0      | -        | -       | -       | -       | -    | -        | -    | -    |   |
| 933124 | F   | W    | M1  | 100       | 102.5 | 91        | 46,XX[20]                   | 46,XX,t(10;12)(p12;p13)[20]                                          | N         |                                                      | 11.1                  | 338                                   | 24.6                 | N    | Y           | 1.5gm x1 | 1.5gm x2 | 0      | 0      | p.L723fs | ITD     | -       | -       | -    | p.W288fs | -    | -    |   |

| UPN    | Induction AraC        | Induction Idarubicin | Methotrexate IT Prophylaxis | Induction Daunorubicin | Induction Genasense  | Induction ATRA        | Induction Etoposide   | Consolidation Ara C                          | Consolidation Genasense | Consolidation Idarubicin                                                             | Consolidation Mitoxantrone                                 | Consolidation Etoposide | Consolidation G-CSF                   | Maintenance Arsenic                         | Auto Transplant Conditioning Busulfan      | Auto Transplant Conditioning Etoposide |
|--------|-----------------------|----------------------|-----------------------------|------------------------|----------------------|-----------------------|-----------------------|----------------------------------------------|-------------------------|--------------------------------------------------------------------------------------|------------------------------------------------------------|-------------------------|---------------------------------------|---------------------------------------------|--------------------------------------------|----------------------------------------|
| 400220 | 100mg/m2/day x 7 days | 12mg/m2/day x 3 days | 12mg x 1 dose               |                        |                      |                       |                       | 3g/m2/q 12 hours every other day x 6 doses   |                         |                                                                                      |                                                            |                         |                                       |                                             |                                            |                                        |
| 426980 | 100mg/m2/day x 7 days |                      |                             | 60mg/m2/day x 3 days   | 7mg/kg/day x 10 days |                       |                       | 2g/m2/day x 5 days                           | 7mg/kg/day x 8 days     |                                                                                      |                                                            |                         |                                       |                                             |                                            |                                        |
| 452198 | 100mg/m2/day x 7 days | 12mg/m2/day x 3 days |                             |                        |                      |                       |                       | 1.5g/m2/q 12 hours every other day x 6 doses |                         |                                                                                      |                                                            |                         |                                       |                                             |                                            |                                        |
| 573988 | 100mg/m2/day x 7 days | 12mg/m2/day x 3 days |                             |                        |                      |                       |                       | 100mg/m2/day x 5 days                        |                         | 12mg/m2/day x 2 days                                                                 |                                                            |                         |                                       |                                             |                                            |                                        |
| 758168 | 200mg/m2/day x 7 days |                      |                             | 60mg/m2/day x 3 days   |                      | 45mg/m2/day x 21 days |                       |                                              |                         | (1)5mg/m2/day x 4 days,<br>(3)10mg/m2/day x 1 day after count recovery from course 2 | (2)10mg/m2/day x 5 days after count recovery from course 1 |                         |                                       | 10mg x 10 days M-F, 2 wks per month x 3 mos |                                            |                                        |
| 804168 | 100mg/m2/day x 7 days |                      |                             | 90mg/m2/day x 3 days   |                      |                       | 100mg/m2/day x 3 days | 3g/m2/q 12 hours every other day x 6 doses   |                         |                                                                                      |                                                            |                         |                                       |                                             |                                            |                                        |
| 869586 | 100mg/m2/day x 7 days |                      |                             | 90mg/m2/day x 3 days   |                      |                       | 100mg/m2/day x 3 days | 2g/m2/q 12 hours x 4 days                    |                         |                                                                                      |                                                            | 10mg/kg/day x 4 days    | 10ug/kg/day until collection complete |                                             | 0.8mg/kg/q 6 hours x 16 doses start day -7 | 60mg/kg x 1 dose day -3                |
| 933124 | 100mg/m2/day x 7 days |                      |                             | 90mg/m2/day x 3 days   |                      |                       | 100mg/m2/day x 3 days | 2g/m2/q 12 hours x 4 days                    |                         |                                                                                      |                                                            | 10mg/kg/day x 4 days    | 10ug/kg/day until collection complete |                                             | 0.8mg/kg/q 6 hours x 16 doses start day -7 | 60mg/kg x 1 dose day -3                |

**Supplementary Table 3.** Target coverage from capture validation for 8 AML cases.

| ID    | UPN    | Type    | Sample Name          | Total Target Base | 1x Coverage (%) | 10x Coverage (%) | 20x Coverage (%) |
|-------|--------|---------|----------------------|-------------------|-----------------|------------------|------------------|
| AML27 | 400220 | normal  | H_KA-400220-0802127  | 8848098           | 98.287          | 95.482           | 94.196           |
| AML27 | 400220 | relapse | H_KA-400220-0912813  | 8848098           | 98.222          | 95.073           | 93.651           |
| AML27 | 400220 | tumor   | H_KA-400220-0814727  | 8848098           | 97.68           | 94.919           | 93.7             |
| AML28 | 426980 | normal  | H_KA-426980-S.14770  | 9995683           | 98.551          | 95.625           | 94.165           |
| AML28 | 426980 | relapse | H_KA-426980-0912807  | 9995683           | 98.398          | 95.232           | 93.736           |
| AML28 | 426980 | tumor   | H_KA-426980-S.15631  | 9995683           | 99.32           | 95.554           | 92.333           |
| AML31 | 452198 | normal  | H_KA-452198-S.22477  | 12888032          | 98.414          | 95.438           | 93.914           |
| AML31 | 452198 | relapse | H_KA-452198-0912806  | 12888032          | 98.612          | 96.351           | 95.115           |
| AML31 | 452198 | tumor   | H_KA-452198-0814719  | 12888032          | 98.266          | 95.252           | 93.768           |
| AML35 | 573988 | normal  | H_KA-573988-0815176  | 11602023          | 98.33           | 95.399           | 93.802           |
| AML35 | 573988 | relapse | H_KA-573988-0926957  | 11602023          | 98.197          | 94.906           | 93.297           |
| AML35 | 573988 | tumor   | H_KA-573988-0814941  | 11602023          | 98.334          | 95.704           | 94.324           |
| AML15 | 758168 | normal  | H_KA-758168-S.22139  | 13153054          | 98.579          | 95.857           | 94.457           |
| AML15 | 758168 | relapse | H_KA-758168-0912815  | 13153054          | 98.462          | 95.754           | 94.319           |
| AML15 | 758168 | tumor   | H_KA-758168-0816987  | 13153054          | 99.446          | 97.066           | 94.64            |
| AML40 | 804168 | normal  | H_KA-804168-0802136  | 9805652           | 99.681          | 99.285           | 98.865           |
| AML40 | 804168 | relapse | H_KA-804168-0912812  | 9805652           | 98.046          | 94.847           | 93.208           |
| AML40 | 804168 | tumor   | H_KA-804168-0814948  | 9805652           | 97.794          | 93.974           | 91.987           |
| AML43 | 869586 | normal  | H_KA-869586G-S.16508 | 13707322          | 98.36           | 95.152           | 93.657           |
| AML43 | 869586 | relapse | H_KA-869586G-0926998 | 13707322          | 98.668          | 95.939           | 94.361           |
| AML43 | 869586 | tumor   | H_KA-869586G-S.16427 | 13707322          | 98.739          | 94.771           | 92.959           |
| AML01 | 933124 | normal  | H_GV-933124G-S.9017  | 1110517           | 99.595          | 98.53            | 97.665           |
| AML01 | 933124 | relapse | H_GV-933124G-S.17384 | 1110517           | 99.057          | 95.772           | 93.175           |
| AML01 | 933124 | tumor   | H_GV-933124G-S.9043  | 1110517           | 99.372          | 96.854           | 94.587           |

**Supplementary Table 4a.** Summary of mutations identified in 8 patients including tier classification.

| ID    | UPN    | Total Mutations | SNVs and DNPs | Indels | Relapse Specific SNVs and DNPs | Relapse Specific Indels | Total Primary Tumor Mutations | Total Relapse Mutations | Tier1 Primary Tumor Mutations | Tier1 Relapse Mutations | Tier1 Primary Tumor Specific Mutations | Tier1 Relapse Specific Mutations | Tier2 Primary Tumor Specific Mutations | Tier2 Relapse Specific Mutations | Tier3 Primary Tumor Specific Mutations | Tier3 Relapse Specific Mutations | Total Tier1 Mutations | Total Tier2 Mutations | Total Tier3 Mutations | Total Tier4 Mutations | Total Primary Tumor Specific Mutations | Total Relapse Specific Mutations | Mutations Common to Primary and Relapse Tumor | Tumor variant allele frequency at relapse-specific sites | Relapse variant allele frequency at relapse-specific sites |
|-------|--------|-----------------|---------------|--------|--------------------------------|-------------------------|-------------------------------|-------------------------|-------------------------------|-------------------------|----------------------------------------|----------------------------------|----------------------------------------|----------------------------------|----------------------------------------|----------------------------------|-----------------------|-----------------------|-----------------------|-----------------------|----------------------------------------|----------------------------------|-----------------------------------------------|----------------------------------------------------------|------------------------------------------------------------|
| AML1  | 933124 | 412             | 386           | 26     | 64                             | 13                      | 335                           | 407                     | 16                            | 19                      | 0                                      | 3                                | 0                                      | 17                               | 5                                      | 57                               | 20                    | 71                    | 321                   | 0                     | 5                                      | 77                               | 330                                           | 0.1085%                                                  | 38.5166%                                                   |
| AML15 | 758168 | 496             | 471           | 25     | 99                             | 0                       | 397                           | 496                     | 15                            | 19                      | 0                                      | 4                                | 0                                      | 13                               | 0                                      | 82                               | 19                    | 66                    | 411                   | 0                     | 0                                      | 99                               | 397                                           | 0.0735%                                                  | 16.0335%                                                   |
| AML27 | 400220 | 307             | 290           | 17     | 22                             | 0                       | 285                           | 306                     | 12                            | 13                      | 0                                      | 1                                | 0                                      | 6                                | 1                                      | 15                               | 13                    | 57                    | 237                   | 0                     | 1                                      | 22                               | 284                                           | 0.0191%                                                  | 12.1951%                                                   |
| AML28 | 426980 | 882             | 843           | 39     | 103                            | 2                       | 777                           | 816                     | 32                            | 35                      | 3                                      | 6                                | 9                                      | 15                               | 54                                     | 84                               | 38                    | 139                   | 705                   | 0                     | 66                                     | 105                              | 711                                           | 0.9515%                                                  | 29.8999%                                                   |
| AML31 | 452198 | 118             | 117           | 1      | 42                             | 0                       | 76                            | 99                      | 9                             | 9                       | 3                                      | 3                                | 4                                      | 7                                | 12                                     | 32                               | 12                    | 16                    | 90                    | 0                     | 19                                     | 42                               | 57                                            | 0.6384%                                                  | 12.6498%                                                   |
| AML35 | 573988 | 150             | 148           | 2      | 15                             | 0                       | 135                           | 150                     | 6                             | 8                       | 0                                      | 2                                | 0                                      | 1                                | 0                                      | 12                               | 8                     | 36                    | 106                   | 0                     | 0                                      | 15                               | 135                                           | 0.0908%                                                  | 9.0446%                                                    |
| AML40 | 804168 | 658             | 622           | 36     | 99                             | 1                       | 558                           | 658                     | 22                            | 26                      | 0                                      | 4                                | 0                                      | 10                               | 0                                      | 86                               | 26                    | 93                    | 539                   | 0                     | 0                                      | 100                              | 558                                           | 0.0582%                                                  | 22.1737%                                                   |
| AML43 | 869586 | 1292            | 1169          | 123    | 12                             | 0                       | 1280                          | 1254                    | 51                            | 50                      | 1                                      | 0                                | 5                                      | 2                                | 32                                     | 10                               | 51                    | 214                   | 1027                  | 0                     | 38                                     | 12                               | 1242                                          | 0.0752%                                                  | 19.1987%                                                   |



**Supplementary Table 4b.** All Tier 1 coding point mutations and Indels in 8 AML cases and their associated annotations.

In UPN 933124, the skin sample was contaminated with an estimated 29% AML cells; the peripheral white blood cell count was 105,000/mm<sup>3</sup> when the skin sample was collected. *EBI2* (A338V) and *PCLKC* (P1004L) mutations previously reported<sup>8</sup> are shown as *GPR183* (A338V) and *PCDH24* (P1004L) respectively in Supplementary Table 4b due to change in nomenclature. In addition, due to the change of transcript structure, *KNDC1* (L799F) and *GRINL1B* (R176H) previously reported<sup>8</sup> are no longer coding mutations.

| UPN    | Chr | Start (NCBI 36) | Start (GRCh37) | Reference | Variant                                     | Gene    | Transcript      | Amino Acid Change | NormalRefReads | NormalVarReads | NormalVarFreq | TumorRefReads | TumorVarReads | TumorVarFreq | RelapseRefReads | RelapseVarReads | RelapseVarFreq | NormalCN | TumorCN | RelapseCN | Classification   | # of samples recurrent (out of 200) |
|--------|-----|-----------------|----------------|-----------|---------------------------------------------|---------|-----------------|-------------------|----------------|----------------|---------------|---------------|---------------|--------------|-----------------|-----------------|----------------|----------|---------|-----------|------------------|-------------------------------------|
| 933124 | 2   | 179184790       | 179476545      | C         | T                                           | TTN*    | ENST00000375038 | p.E12813K         | 10721          | 2174           | 15.75%        | 8955          | 7039          | 43.57%       | 8281            | 5562            | 39.28%         | 2        | 2       | 2         | shared           | 13                                  |
| 933124 | 5   | 175948939       | 176016333      | C         | T                                           | PCDH24  | NM_017675       | p.P1004L          | 8521           | 794            | 8.66%         | 5120          | 5094          | 47.81%       | 4566            | 3204            | 40.70%         | 2        | 2       | 2         | shared           | 0                                   |
| 933124 | 10  | 105228735       | 105238745      | C         | T                                           | CALHM3  | ENST00000369783 | p.S15             | 11285          | 3078           | 20.52%        | 9204          | 7466          | 44.19%       | 498             | 353             | 41.48%         | 2        | 2       | 2         | shared           | 1                                   |
| 933124 | 10  | 112346166       | 112356176      | G         | T                                           | SMC3*   | NM_005445       | p.G662C           | 8761           | 2734           | 21.80%        | 9082          | 7834          | 50.28%       | 6104            | 5969            | 49.13%         | 2        | 2       | 2         | shared           | 6                                   |
| 933124 | 10  | 134734535       | 134884545      | C         | T                                           | GPR123  | ENST00000368577 | p.T38I            | 8148           | 2276           | 20.13%        | 6337          | 7481          | 49.96%       | 5488            | 4940            | 41.57%         | 2        | 2       | 2         | shared           | 1                                   |
| 933124 | 12  | 11883491        | 11992224       | G         | C                                           | ETV6*   | NM_001987       | p.R105P           | 13413          | 1              | 0.01%         | 15113         | 3             | 0.02%        | 6202            | 4086            | 38.80%         | 2        | 2       | 2         | relapse-specific | 5                                   |
| 933124 | 13  | 98176393        | 99378392       | C         | T                                           | SLC15A1 | NM_005073       | p.W77*            | 9390           | 1998           | 15.68%        | 8439          | 9910          | 51.50%       | 6296            | 5829            | 45.90%         | 2        | 2       | 2         | shared           | 1                                   |
| 933124 | 13  | 98745388        | 99947387       | G         | A                                           | GPR183  | NM_004951       | p.A338V           | 7168           | 1857           | 20.42%        | 4671          | 3872          | 47.16%       | 5318            | 4371            | 44.85%         | 2        | 2       | 2         | shared           | 2                                   |
| 933124 | 14  | 22588266        | 23518426       | G         | T                                           | CDH24   | NM_022478       | p.Y590*           | 4577           | 1166           | 15.62%        | 4405          | 5022          | 46.87%       | 2943            | 2660            | 46.73%         | 2        | 2       | 2         | shared           | 1                                   |
| 933124 | 16  | 15030292        | 15122791       | G         | A                                           | PDXDC1* | NM_015027       | p.E421K           | 8684           | 778            | 8.48%         | 12623         | 4597          | 28.09%       | 8962            | 3098            | 25.45%         | 2        | 2       | 2         | shared           | 1                                   |
| 933124 | 20  | 40164254        | 40730840       | G         | A                                           | PTPRT   | NM_133170       | p.P1232L          | 7222           | 1981           | 20.25%        | 6478          | 5396          | 45.24%       | 5145            | 4738            | 45.31%         | 2        | 2       | 2         | shared           | 3                                   |
| 933124 | 21  | 40336315        | 41414445       | A         | G                                           | DSCAM   | NM_001389       | p.L1847           | 8549           | 1538           | 14.97%        | 7622          | 7923          | 50.64%       | 6711            | 5011            | 42.88%         | 2        | 2       | 2         | shared           | 1                                   |
| 933124 | 22  | 24752889        | 26422889       | G         | A                                           | MYO18B* | NM_032608       | p.A2317T          | 10667          | 10             | 0.10%         | 11287         | 14            | 0.19%        | 6009            | 4785            | 45.71%         | 2        | 2       | 2         | relapse-specific | 2                                   |
| 933124 | 2   | 25317018        | 25463514       | A         | -                                           | DNMT3A* | NM_022552       | p.L723fs          | 1162           | 204            | 14.93%        | 415           | 398           | 48.95%       | 623             | 358             | 36.49%         | 0        | 0       | 0         | shared           | 49                                  |
| 933124 | 5   | 170770150       | 170837545      | -         | TGCA<br>GAAATCAACGCTAGA<br>AGTACTCATTATCTGA | NPM1    | NM_002520       | p.W287fs          | 463            | 55             | 10.62%        | 21            | 14            | 40.00%       | 26              | 12              | 31.58%         | 0        | 0       | 0         | shared           | 53                                  |
| 933124 | 13  | 27506273        | 28608273       | -         | GAGCGCGGGGC                                 | FLT3    | NM_004119       | p.594in_frame_ins | 1907           | 239            | 11.14%        | 721           | 413           | 36.42%       | 690             | 317             | 31.48%         | 0        | 0       | 0         | shared           | 52                                  |
| 933124 | 20  | 43115216        | 43681802       | -         | GAGCGCGGGGC                                 | STK4*   | ENST00000372801 | p.A461fs          | 2205           | 0              | 0.00%         | 1586          | 0             | 0.00%        | 967             | 256             | 20.93%         | 0        | 0       | 0         | relapse-specific | 0                                   |
| 758168 | 11  | 1229284         | 1272708        | C         | T                                           | MUC5B   | NM_002458       | p.T4869           | 210            | 33             | 13.58%        | 21            | 263           | 92.61%       | 18              | 246             | 93.18%         | 2        | 1.28    | 1.25      | shared           | 3                                   |
| 758168 | 11  | 61267618        | 61511042       | C         | T                                           | DAGLA   | NM_006133       | p.S737L           | 325            | 0              | 0.00%         | 365           | 0             | 0.00%        | 313             | 76              | 19.54%         | 2        | 2       | 1.38      | relapse-specific | 1                                   |
| 758168 | 11  | 64146939        | 64390363       | G         | A                                           | NRXN2   | NM_015080       | p.S1345           | 310            | 0              | 0.00%         | 365           | 2             | 0.54%        | 302             | 55              | 15.41%         | 2        | 2       | 1.37      | relapse-specific | 2                                   |
| 758168 | 11  | 99450197        | 99944987       | C         | T                                           | CNTN5   | NM_014361       | p.S514F           | 566            | 46             | 7.52%         | 352           | 290           | 45.17%       | 305             | 260             | 46.02%         | 2        | 2       | 2         | shared           | 2                                   |
| 758168 | 13  | 18910252        | 20012252       | C         | T                                           | TPTE2   | NM_199254       | p.E339K           | 381            | 32             | 7.75%         | 213           | 165           | 43.65%       | 198             | 191             | 49.10%         | 2        | 2       | 2         | shared           | 1                                   |
| 758168 | 13  | 72244339        | 73346338       | C         | T                                           | DIS3    | NM_014953       | p.D488N           | 561            | 43             | 7.12%         | 330           | 251           | 43.20%       | 324             | 285             | 46.80%         | 2        | 2       | 2         | shared           | 3                                   |
| 758168 | 15  | 84063349        | 86262345       | AAGATCA   | -                                           | AKAP13  | NM_006738       | p.K2018fs         | 735            | 61             | 7.66%         | 411           | 336           | 44.98%       | 420             | 317             | 43.01%         | 2        | 2       | 2         | shared           | 2                                   |
| 758168 | 17  | 11513530        | 11572805       | T         | G                                           | DNAH9   | NM_001372       | p.L1016R          | 503            | 50             | 9.04%         | 321           | 260           | 44.75%       | 313             | 256             | 44.99%         | 2        | 2       | 2         | shared           | 5                                   |

|        |    |           |           |   |   |                                                                   |                 |           |                   |     |        |        |     |        |        |     |        |        |      |      |                  |        |    |
|--------|----|-----------|-----------|---|---|-------------------------------------------------------------------|-----------------|-----------|-------------------|-----|--------|--------|-----|--------|--------|-----|--------|--------|------|------|------------------|--------|----|
| 758168 | 17 | 3004064   | 3057314   | G | A | ENSG00000180144                                                   | ENST00000324144 | p.A261V   | 467               | 0   | 0.00%  | 525    | 0   | 0.00%  | 436    | 106 | 19.56% | 2      | 2    | 2    | relapse-specific | 0      |    |
| 758168 | 19 | 48131669  | 43439829  | G | T | PSG7                                                              | NM_002783       | p.L53I    | 142               | 8   | 5.33%  | 95     | 103 | 52.02% | 113    | 77  | 40.53% | 2      | 2    | 2    | shared           | 1      |    |
| 758168 | 2  | 225157935 | 225449691 | C | A | CUL3                                                              | NM_003590       | p.K12N    | 199               | 16  | 7.44%  | 102    | 92  | 47.42% | 88     | 88  | 50.00% | 2      | 2    | 2    | shared           | 1      |    |
| 758168 | 2  | 32298967  | 32445463  | A | G | SLC30A6                                                           | NM_017964       | p.H356R   | 545               | 46  | 7.78%  | 352    | 344 | 49.43% | 383    | 285 | 42.66% | 2      | 2    | 2    | shared           | 1      |    |
| 758168 | 20 | 41777325  | 42343911  | G | A | MYBL2                                                             | NM_002466       | p.T654    | 362               | 40  | 9.95%  | 232    | 187 | 44.63% | 256    | 200 | 43.86% | 2      | 2    | 2    | shared           | 1      |    |
| 758168 | 22 | 45144326  | 46765662  | G | T | CELSR1                                                            | NM_014246       | p.P2600H  | 352               | 24  | 6.38%  | 234    | 181 | 43.61% | 290    | 199 | 40.70% | 2      | 2    | 1.34 | shared           | 1      |    |
| 758168 | 4  | 183840022 | 183603028 | C | T | ODZ3                                                              | NM_001080477    | p.C632    | 386               | 0   | 0.00%  | 435    | 0   | 0.00%  | 401    | 39  | 8.86%  | 2      | 2    | 2    | relapse-specific | 2      |    |
| 758168 | 7  | 6727252   | 6760727   | A | G | LOC100134687                                                      | XM_001725648    | p.W105R   | 188               | 15  | 7.39%  | 96     | 115 | 54.50% | 127    | 85  | 40.09% | 2      | 2    | 2    | shared           | 1      |    |
| 758168 | 8  | 21825961  | 21770015  | G | A | DOK2                                                              | NM_003974       | p.R24C    | 218               | 17  | 7.23%  | 165    | 135 | 45.00% | 153    | 129 | 45.74% | 2      | 2    | 2    | shared           | 1      |    |
| 400220 | 1  | 202854975 | 204588352 | G | A | LRRN2                                                             | NM_006338       | p.L257    | 481               | 36  | 6.96%  | 324    | 258 | 44.33% | 246    | 161 | 39.56% | 2      | 2    | 2    | shared           | 1      |    |
| 400220 | 11 | 32370187  | 32413611  | C | T | WT1                                                               | NM_024426       | e9-1      | 549               | 33  | 5.67%  | 394    | 292 | 42.57% | 327    | 195 | 37.36% | 2      | 2    | 2    | shared           | 13     |    |
| 400220 | 13 | 27506258  | 28608258  | - | - | GGCGATATTCATATTCTCT<br>GAAATCAACGTAGAAGTAC<br>TCATTATCTGAGGAGCCGG | FLT3            | NM_004119 | p.599in_frame_ins | 228 | 39     | 14.61% | 145 | 226    | 60.92% | 108 | 196    | 64.47% | 2    | 2    | 2                | shared | 52 |
| 400220 | 14 | 67106471  | 68036718  | G | A | PLEKHH1                                                           | NM_020715       | p.A475T   | 563               | 38  | 6.32%  | 397    | 350 | 46.85% | 331    | 198 | 37.43% | 2      | 2    | 2    | shared           | 2      |    |
| 400220 | 21 | 35181023  | 36259153  | G | A | RUNX1                                                             | NM_001754       | p.P113L   | 312               | 36  | 10.34% | 39     | 368 | 90.42% | 70     | 233 | 76.90% | 2      | 2    | 2    | shared           | 17     |    |
| 400220 | 6  | 136639071 | 136597378 | G | A | BCLAF1                                                            | NM_014739       | p.R429W   | 623               | 18  | 2.81%  | 535    | 195 | 26.71% | 561    | 135 | 19.40% | 2      | 2    | 2    | shared           | 1      |    |
| 400220 | 6  | 35320457  | 35212479  | C | T | SCUBE3                                                            | NM_152753       | p.R764    | 618               | 54  | 8.04%  | 403    | 342 | 45.91% | 331    | 197 | 37.31% | 2      | 2    | 2    | shared           | 1      |    |
| 400220 | 8  | 16022443  | 15978072  | G | A | MSR1                                                              | NM_138715       | p.H359    | 397               | 27  | 6.37%  | 239    | 254 | 51.52% | 199    | 118 | 37.22% | 2      | 2    | 2    | shared           | 1      |    |
| 400220 | X  | 39818802  | 39933858  | C | - | BCOR                                                              | NM_017745       | p.P248fs  | 539               | 52  | 8.80%  | 407    | 412 | 50.31% | 389    | 214 | 35.49% | 2      | 2    | 2    | shared           | 1      |    |
| 426980 | 1  | 1105467   | 1115604   | C | T | TTL10                                                             | NM_153254       | p.A57     | 315               | 38  | 10.76% | 162    | 120 | 42.55% | 36     | 40  | 52.63% | 2      | 1.25 | 1.38 | shared           | 1      |    |
| 426980 | 1  | 154189110 | 155922486 | G | T | ARHGEF2                                                           | NM_004723       | p.G611    | 455               | 10  | 2.15%  | 301    | 189 | 38.57% | 326    | 191 | 36.94% | 2      | 2    | 2    | shared           | 1      |    |
| 426980 | 1  | 204839488 | 206772865 | T | C | LGTN                                                              | NM_006893       | p.Y385C   | 399               | 7   | 1.72%  | 257    | 259 | 50.19% | 424    | 360 | 45.92% | 2      | 2    | 2    | shared           | 1      |    |
| 426980 | 1  | 3628599   | 3638739   | C | T | TP73                                                              | NM_005427       | p.P195L   | 473               | 7   | 1.46%  | 272    | 207 | 43.22% | 11     | 13  | 54.17% | 2      | 2    | 2    | shared           | 1      |    |
| 426980 | 1  | 89433568  | 89660980  | C | A | GBP4                                                              | NM_052941       | p.K121N   | 572               | 1   | 0.17%  | 650    | 9   | 1.37%  | 461    | 218 | 32.11% | 2      | 2    | 2    | relapse-specific | 2      |    |
| 426980 | 11 | 112788535 | 113283325 | G | A | DRD2                                                              | NM_000795       | p.S364F   | 661               | 8   | 1.20%  | 483    | 353 | 42.22% | 838    | 121 | 12.62% | 2      | 2    | 2    | shared           | 3      |    |
| 426980 | 11 | 72623244  | 72945596  | G | T | P2RY2                                                             | NM_002564       | p.R131L   | 605               | 10  | 1.63%  | 340    | 291 | 46.12% | 316    | 40  | 11.24% | 2      | 2    | 2    | shared           | 2      |    |
| 426980 | 12 | 127744443 | 129178490 | G | A | TMEM132C                                                          | ENST00000315208 | p.W138*   | 488               | 8   | 1.61%  | 330    | 241 | 42.21% | 598    | 85  | 12.45% | 2      | 2    | 2    | shared           | 1      |    |
| 426980 | 12 | 49922439  | 51636172  | A | G | DAZAP2                                                            | NM_014764       | p.N146S   | 434               | 4   | 0.91%  | 268    | 247 | 47.96% | 301    | 214 | 41.55% | 2      | 2    | 2    | shared           | 1      |    |
| 426980 | 13 | 35326695  | 36428695  | G | A | DCLK1                                                             | NM_004734       | p.R326C   | 399               | 0   | 0.00%  | 537    | 3   | 0.56%  | 367    | 174 | 32.16% | 2      | 2    | 2    | relapse-specific | 1      |    |
| 426980 | 15 | 88432938  | 90631934  | C | A | IDH2                                                              | NM_002168       | p.R140L   | 740               | 12  | 1.60%  | 381    | 307 | 44.62% | 553    | 67  | 10.81% | 2      | 2    | 2    | shared           | 19     |    |
| 426980 | 15 | 88432939  | 90631935  | G | A | IDH2                                                              | NM_002168       | p.R140W   | 742               | 0   | 0.00%  | 678    | 7   | 1.02%  | 414    | 202 | 32.79% | 2      | 2    | 2    | relapse-specific | 19     |    |
| 426980 | 16 | 31290499  | 31382998  | C | T | ITGAX                                                             | NM_000887       | p.R685C   | 604               | 7   | 1.15%  | 270    | 281 | 51.00% | 285    | 286 | 50.09% | 2      | 2    | 2    | shared           | 1      |    |
| 426980 | 19 | 41696897  | 37005057  | A | G | ZNF260                                                            | NM_001012756    | p.C362R   | 501               | 0   | 0.00%  | 582    | 7   | 1.19%  | 326    | 129 | 28.35% | 2      | 2    | 2    | relapse-specific | 0      |    |
| 426980 | 19 | 50958451  | 46266611  | C | T | LOC388553                                                         | XM_373809       | p.T518    | 395               | 2   | 0.50%  | 222    | 203 | 47.76% | 259    | 25  | 8.80%  | 2      | 2    | 2    | shared           | 1      |    |
| 426980 | 19 | 60109826  | 55418014  | C | T | NCR1                                                              | NM_004829       | p.A68     | 723               | 0   | 0.00%  | 821    | 10  | 1.20%  | 933    | 323 | 25.72% | 2      | 2    | 2    | relapse-specific | 1      |    |
| 426980 | 19 | 8512789   | 8606789   | C | T | MYO1F                                                             | NM_012335       | e15+1     | 542               | 8   | 1.45%  | 319    | 257 | 44.62% | 24     | 17  | 41.46% | 2      | 2    | 2    | shared           | 2      |    |
| 426980 | 2  | 15674817  | 15757366  | A | G | DDX1                                                              | NM_004939       | e15-2     | 547               | 10  | 1.80%  | 383    | 335 | 46.66% | 284    | 232 | 44.96% | 2      | 2    | 2    | shared           | 1      |    |
| 426980 | 2  | 233837397 | 234172658 | C | T | ATG16L1                                                           | NM_030803       | p.D112    | 637               | 10  | 1.55%  | 366    | 297 | 44.80% | 299    | 198 | 39.84% | 2      | 2    | 2    | shared           | 2      |    |
| 426980 | 2  | 234415280 | 234750541 | G | A | HJURP                                                             | NM_018410       | p.S295    | 675               | 4   | 0.59%  | 450    | 331 | 42.38% | 521    | 327 | 38.56% | 2      | 2    | 2    | shared           | 2      |    |
| 426980 | 20 | 61515246  | 62044802  | C | T | KCNQ2                                                             | NM_172107       | e15+1     | 251               | 9   | 3.46%  | 132    | 117 | 46.99% | 62     | 9   | 12.68% | 2      | 1.41 | 1.42 | shared           | 2      |    |
| 426980 | 5  | 127725400 | 127697501 | G | A | FBN2                                                              | NM_001999       | p.N823    | 1154              | 9   | 0.77%  | 640    | 498 | 43.76% | 2824   | 11  | 0.39%  | 2      | 2    | 2    | tumor-specific   | 1      |    |





|        |    |           |           |   |       |           |                 |                      |     |    |       |     |     |        |     |     |        |   |      |      |                |    |
|--------|----|-----------|-----------|---|-------|-----------|-----------------|----------------------|-----|----|-------|-----|-----|--------|-----|-----|--------|---|------|------|----------------|----|
| 869586 | 2  | 169488496 | 169780250 | G | A     | ABCB11    | NM_003742       | p.A1283V             | 813 | 10 | 1.22% | 324 | 287 | 46.97% | 408 | 114 | 21.84% | 2 | 2    | 2    | shared         | 1  |
| 869586 | 2  | 179181002 | 179472757 | - | GAC   | TTN       | ENST00000375038 | p.I13568in_frame_ins | 844 | 6  | 0.71% | 512 | 127 | 19.87% | 667 | 62  | 8.50%  | 2 | 2    | 2    | shared         | 13 |
| 869586 | 20 | 33485469  | 34022055  | A | T     | GDF5      | NM_000557       | p.T386               | 256 | 4  | 1.54% | 114 | 86  | 43.00% | 130 | 37  | 22.16% | 2 | 2    | 2    | shared         | 1  |
| 869586 | 21 | 35174739  | 36252869  | - | GGCTA | RUNX1     | NM_001754       | p.G164fs             | 532 | 6  | 1.12% | 306 | 188 | 38.06% | 437 | 76  | 14.81% | 2 | 2    | 2    | shared         | 17 |
| 869586 | 3  | 170003465 | 168520771 | C | T     | LOC253820 | XM_001726233    | p.P108               | 899 | 6  | 0.66% | 642 | 125 | 16.30% | 492 | 116 | 19.08% | 2 | 2    | 2    | shared         | 1  |
| 869586 | 3  | 50268699  | 50293695  | G | A     | GNAI2     | NM_002070       | p.R179H              | 621 | 2  | 0.32% | 310 | 94  | 23.27% | 391 | 0   | 0.00%  | 2 | 2    | 2    | tumor-specific | 1  |
| 869586 | 3  | 9761731   | 9786731   | T | C     | BRPF1     | NM_001003694    | p.V987A              | 492 | 8  | 1.60% | 282 | 223 | 44.16% | 355 | 82  | 18.76% | 2 | 2    | 2    | shared         | 1  |
| 869586 | 6  | 117234348 | 117127655 | C | A     | GPRC6A    | NM_148963       | p.D405Y              | 463 | 9  | 1.91% | 238 | 204 | 46.15% | 344 | 68  | 16.50% | 2 | 2    | 2    | shared         | 2  |
| 869586 | 6  | 126252643 | 126210950 | A | G     | NCOA7     | NM_181782       | p.K584E              | 656 | 12 | 1.80% | 222 | 190 | 46.12% | 413 | 113 | 21.48% | 2 | 2    | 2    | shared         | 2  |
| 869586 | 6  | 33396275  | 33288297  | G | A     | DAXX      | NM_001350       | p.R371W              | 746 | 9  | 1.19% | 353 | 344 | 49.35% | 466 | 107 | 18.67% | 2 | 2    | 2    | shared         | 2  |
| 869586 | 6  | 39977212  | 39869234  | C | T     | DAAM2     | NM_015345       | p.R989C              | 211 | 8  | 3.65% | 131 | 107 | 44.96% | 157 | 36  | 18.65% | 2 | 2    | 2    | shared         | 1  |
| 869586 | 6  | 44351654  | 44243676  | G | A     | TMEM151B  | ENST00000388811 | p.T371               | 249 | 1  | 0.40% | 98  | 71  | 42.01% | 120 | 32  | 21.05% | 2 | 2    | 2    | shared         | 1  |
| 869586 | 6  | 75917701  | 75860981  | G | A     | COL12A1   | NM_004370       | p.V134I              | 628 | 3  | 0.48% | 210 | 133 | 38.78% | 416 | 108 | 20.61% | 2 | 2    | 2    | shared         | 4  |
| 869586 | 6  | 89948418  | 89891699  | C | T     | GABRR1    | NM_002042       | p.A286T              | 440 | 5  | 1.12% | 220 | 191 | 46.47% | 314 | 73  | 18.86% | 2 | 2    | 2    | shared         | 1  |
| 869586 | 7  | 90733681  | 90895745  | G | A     | FZD1      | NM_003505       | p.R517H              | 576 | 8  | 1.37% | 242 | 201 | 45.37% | 316 | 71  | 18.35% | 2 | 2    | 2    | shared         | 1  |
| 869586 | 8  | 100274306 | 100205130 | C | A     | VPS13B    | NM_017890       | p.T787N              | 959 | 13 | 1.34% | 401 | 267 | 39.97% | 541 | 130 | 19.37% | 2 | 2    | 2    | shared         | 1  |
| 869586 | 8  | 105436497 | 105367321 | C | T     | TM7SF4    | NM_030788       | p.R416C              | 706 | 12 | 1.67% | 315 | 241 | 43.35% | 413 | 102 | 19.81% | 2 | 2    | 2    | shared         | 1  |
| 869586 | 8  | 143622650 | 143625648 | C | T     | BAI1      | NM_001702       | p.T1542M             | 448 | 4  | 0.88% | 160 | 178 | 52.66% | 242 | 70  | 22.44% | 2 | 2    | 2    | shared         | 2  |
| 869586 | 8  | 143691876 | 143694874 | C | G     | ARC       | NM_015193       | p.W253C              | 577 | 14 | 2.37% | 304 | 229 | 42.96% | 371 | 87  | 19.00% | 2 | 2    | 2    | shared         | 1  |
| 869586 | 8  | 145639466 | 145668658 | G | A     | NFKBIL2   | ENST00000409379 | p.T104M              | 588 | 9  | 1.51% | 301 | 238 | 44.16% | 356 | 92  | 20.54% | 2 | 2    | 2    | shared         | 0  |
| 869586 | 8  | 98358079  | 98288903  | C | A     | TSPYL5    | NM_033512       | p.E390D              | 549 | 6  | 1.08% | 313 | 237 | 43.09% | 365 | 87  | 19.25% | 2 | 2    | 2    | shared         | 1  |
| 869586 | X  | 133378890 | 133551224 | G | T     | PHF6      | NM_001015877    | p.G287V              | 449 | 15 | 3.23% | 22  | 316 | 93.49% | 235 | 145 | 38.16% | 2 | 0.97 | 0.99 | shared         | 6  |

\*Relative expression levels of select mutant alleles in 933124 based on cDNA sequence data: TTN (31.44% tumor, 18.44% relapse), SMC3 (49.65% tumor, 40.76% relapse), PDXDC1 (49.21% tumor, 44.43% relapse), DNMT3A (38.91% tumor, 29.77% relapse), ETV6 (0.07% tumor, 28.60% relapse), MYO18B (0.38% tumor, 0.54% relapse), STK4 (0.00% tumor, 66.60% relapse)























Supplementary Table 5b. Deep readcounts for somatic indels in UPN 933124.

| Tier | Chr | Start (NCBI 36) | Stop (NCBI 36) | Chr | (Start GRCh37) | Stop (GRCh37) | Reference allele | Variant allele                               | 454.nrm.reads.ref | 454.nrm.reads.var | 454.nrm.var.freq | 454.tum.reads.ref | 454.tum.reads.var | 454.tum.var.freq | 454.rel.reads.ref | 454.rel.reads.var | 454.rel.var.freq | ill.nrm.reads.ref | ill.nrm.reads.var | ill.nrm.var.freq | ill.tum.reads.ref | ill.tum.reads.var | ill.tum.var.freq | ill.rel.reads.ref | ill.rel.reads.var | ill.rel.var.freq | cap.nrm.reads.ref | cap.nrm.reads.var | cap.nrm.var.freq | cap.tum.reads.ref | cap.tum.reads.var | cap.tum.var.freq | cap.rel.reads.ref | cap.rel.reads.var | cap.rel.var.freq | avg.nrm.var.freq | avg.tum.var.freq | avg.rel.var.freq |      |
|------|-----|-----------------|----------------|-----|----------------|---------------|------------------|----------------------------------------------|-------------------|-------------------|------------------|-------------------|-------------------|------------------|-------------------|-------------------|------------------|-------------------|-------------------|------------------|-------------------|-------------------|------------------|-------------------|-------------------|------------------|-------------------|-------------------|------------------|-------------------|-------------------|------------------|-------------------|-------------------|------------------|------------------|------------------|------------------|------|
| 1    | 2   | 25317018        | 25317018       | 2   | 25463514       | 25463514      | A                | -                                            | 1873              | 383               | 0.17             | 776               | 549               | 0.41             | 1750              | 466               | 0.21             | -                 | -                 | -                | -                 | -                 | -                | -                 | -                 | -                | 1162              | 204               | 0.15             | 415               | 398               | 0.49             | 623               | 358               | 0.36             | 0.16             | 0.45             | 0.29             |      |
| 2    | 3   | 37458956        | 37458956       | 3   | 37483952       | 37483952      | C                | -                                            | 1550              | 69                | 0.04             | 2077              | 278               | 0.12             | 2983              | 1978              | 0.40             | -                 | -                 | -                | -                 | -                 | -                | -                 | -                 | -                | 2015              | 2                 | 0.00             | 845               | 1                 | 0.00             | 512               | 395               | 0.44             | 0.02             | 0.06             | 0.42             |      |
| 2    | 11  | 28542151        | 28542151       | 11  | 28585575       | 28585575      | T                | -                                            | 715               | 169               | 0.19             | 373               | 337               | 0.47             | 662               | 553               | 0.46             | -                 | -                 | -                | -                 | -                 | -                | -                 | -                 | -                | 2534              | 431               | 0.15             | 513               | 417               | 0.45             | 448               | 396               | 0.47             | 0.17             | 0.46             | 0.46             |      |
| 2    | 12  | 91063778        | 91063778       | 12  | 92539647       | 92539647      | C                | -                                            | 2008              | 178               | 0.08             | 900               | 531               | 0.37             | 730               | 425               | 0.37             | -                 | -                 | -                | -                 | -                 | -                | -                 | -                 | -                | 660               | 90                | 0.12             | 246               | 227               | 0.48             | 504               | 349               | 0.41             | 0.10             | 0.43             | 0.39             |      |
| 2    | 17  | 34068941        | 34068942       | 17  | 36815415       | 36815416      | -                | T                                            | 1004              | 2                 | 0.00             | 1100              | 1                 | 0.00             | 566               | 336               | 0.37             | -                 | -                 | -                | -                 | -                 | -                | -                 | -                 | -                | 3297              | 2                 | 0.00             | 2202              | 4                 | 0.00             | 1335              | 834               | 0.38             | 0.00             | 0.00             | 0.38             |      |
| 3    | 2   | 109230419       | 109230420      | 2   | 109863987      | 109863988     | -                | A                                            | 4098              | 5                 | 0.00             | 2446              | 5                 | 0.00             | 5535              | 3571              | 0.39             | -                 | -                 | -                | -                 | -                 | -                | -                 | -                 | -                | 3707              | 2                 | 0.00             | 3423              | 2                 | 0.00             | 1881              | 1096              | 0.37             | 0.00             | 0.00             | 0.38             |      |
| 3    | 2   | 143692014       | 143692015      | 2   | 143975544      | 143975545     | -                | G                                            | 5406              | 86                | 0.02             | 3850              | 66                | 0.02             | 3985              | 1039              | 0.21             | -                 | -                 | -                | -                 | -                 | -                | -                 | -                 | -                | 1888              | 1                 | 0.00             | 2205              | 1                 | 0.00             | 1316              | 532               | 0.29             | 0.01             | 0.01             | 0.25             |      |
| 3    | 3   | 72575849        | 72575850       | 3   | 72493159       | 72493160      | -                | T                                            | 2328              | 2                 | 0.00             | 1617              | 2                 | 0.00             | 1555              | 1066              | 0.41             | -                 | -                 | -                | -                 | -                 | -                | -                 | -                 | -                | 2097              | 1                 | 0.00             | 821               | 1                 | 0.00             | 625               | 457               | 0.42             | 0.00             | 0.00             | 0.41             |      |
| 3    | 4   | 39379194        | 39379195       | 4   | 39702799       | 39702800      | -                | G                                            | 1819              | 386               | 0.18             | 402               | 518               | 0.56             | 849               | 745               | 0.47             | -                 | -                 | -                | -                 | -                 | -                | -                 | -                 | -                | 324               | 61                | 0.16             | 12                | 14                | 0.54             | -                 | -                 | -                | 0.17             | 0.55             | 0.47             |      |
| 3    | 4   | 154576734       | 154576734      | 4   | 154357284      | 154357284     | A                | 0                                            | 834               | 7                 | 0.01             | 293               | 1                 | 0.00             | 414               | 138               | 0.25             | -                 | -                 | -                | -                 | -                 | -                | -                 | -                 | -                | 2334              | 3                 | 0.00             | 1073              | 4                 | 0.00             | 626               | 386               | 0.38             | 0.00             | 0.00             | 0.32             |      |
| 3    | 7   | 121412639       | 121412640      | 7   | 121625403      | 121625404     | -                | T                                            | 1000              | 24                | 0.02             | 872               | 51                | 0.06             | 332               | 54                | 0.14             | -                 | -                 | -                | -                 | -                 | -                | -                 | -                 | -                | 521               | 2                 | 0.00             | 87                | 0                 | 0.00             | 33                | 23                | 0.41             | 0.01             | 0.03             | 0.28             |      |
| 3    | 9   | 97963721        | 97963722       | 9   | 98923900       | 98923901      | -                | A                                            | 3355              | 3                 | 0.00             | 1757              | 1                 | 0.00             | 2438              | 1683              | 0.41             | -                 | -                 | -                | -                 | -                 | -                | -                 | -                 | -                | 3710              | 0                 | 0.00             | 2249              | 5                 | 0.00             | 1068              | 766               | 0.42             | 0.00             | 0.00             | 0.41             |      |
| 3    | 13  | 42312208        | 42312208       | 13  | 43414208       | 43414208      | T                | -                                            | 604               | 224               | 0.27             | 508               | 678               | 0.57             | 290               | 410               | 0.59             | -                 | -                 | -                | -                 | -                 | -                | -                 | -                 | -                | 1342              | 244               | 0.15             | 516               | 403               | 0.44             | 455               | 325               | 0.42             | 0.21             | 0.51             | 0.50             |      |
| 3    | 15  | 91592526        | 91592527       | 15  | 93791522       | 93791523      | -                | A                                            | 3496              | 961               | 0.22             | 3648              | 2758              | 0.43             | 2449              | 1492              | 0.38             | -                 | -                 | -                | -                 | -                 | -                | -                 | -                 | -                | 1200              | 198               | 0.14             | 707               | 513               | 0.42             | 735               | 403               | 0.35             | 0.18             | 0.43             | 0.37             |      |
| 3    | X   | 5661876         | 5661876        | X   | 5651876        | 5651876       | T                | -                                            | 352               | 30                | 0.08             | 178               | 174               | 0.49             | 574               | 439               | 0.43             | -                 | -                 | -                | -                 | -                 | -                | -                 | -                 | -                | 1648              | 247               | 0.13             | 170               | 140               | 0.45             | 126               | 90                | 0.42             | 0.10             | 0.47             | 0.43             |      |
| 3    | X   | 14461078        | 14461078       | X   | 14551157       | 14551157      | T                | -                                            | 690               | 82                | 0.11             | 335               | 240               | 0.42             | 481               | 352               | 0.42             | -                 | -                 | -                | -                 | -                 | -                | -                 | -                 | -                | 292               | 42                | 0.13             | 37                | 22                | 0.37             | 16                | 17                | 0.52             | 0.12             | 0.40             | 0.47             |      |
| 3    | X   | 130987641       | 130987642      | X   | 131159960      | 131159961     | -                | A                                            | 2946              | 236               | 0.07             | 1594              | 100               | 0.06             | 1367              | 906               | 0.40             | -                 | -                 | -                | -                 | -                 | -                | -                 | -                 | -                | 950               | 0                 | 0.00             | 218               | 0                 | 0.00             | 109               | 77                | 0.41             | 0.04             | 0.03             | 0.41             |      |
| 3    | 4   | 163130129       | 163130132      | 4   | 162910679      | 162910682     | ACTA             | -                                            | 3545              | 1                 | 0.00             | 1773              | 1                 | 0.00             | 3008              | 1820              | 0.38             | -                 | -                 | -                | -                 | -                 | -                | -                 | -                 | -                | 1002              | 115               | 0.10             | 280               | 137               | 0.33             | 294               | 92                | 0.24             | 0.05             | 0.16             | 0.31             |      |
| 3    | 5   | 169060195       | 169060196      | 5   | 169127617      | 169127618     | -                | TAGTTTT                                      | 1238              | 138               | 0.10             | 507               | 377               | 0.43             | 541               | 223               | 0.29             | -                 | -                 | -                | -                 | -                 | -                | -                 | -                 | -                | 698               | 74                | 0.10             | 84                | 47                | 0.36             | 70                | 35                | 0.33             | 0.10             | 0.39             | 0.31             |      |
| 1    | 5   | 170770150       | 170770151      | 5   | 170837545      | 170837546     | -                | TGCA                                         | 1794              | 142               | 0.07             | 742               | 463               | 0.38             | 1206              | 2                 | 0.00             | -                 | -                 | -                | -                 | -                 | -                | -                 | -                 | -                | 463               | 55                | 0.11             | 21                | 14                | 0.40             | 26                | 12                | 0.32             | 0.09             | 0.39             | 0.16             |      |
| 2    | 7   | 115412686       | 115412698      | 7   | 115625450      | 115625462     | TATTTACTGTGCT    | GGGA                                         | 6004              | 0                 | 0.00             | 2702              | 0                 | 0.00             | 3085              | 0                 | 0.00             | -                 | -                 | -                | -                 | -                 | -                | -                 | -                 | -                | 909               | 0                 | 0.00             | 448               | 0                 | 0.00             | 206               | 89                | 0.30             | 0.00             | 0.00             | 0.15             |      |
| 3    | 11  | 57364966        | 57364967       | 11  | 57608390       | 57608391      | -                | AGTCCC<br>GAAATCAACGTAGAA<br>GTACTCATTATCTGA | 1228              | 0                 | 0.00             | 2350              | 0                 | 0.00             | 1145              | 665               | 0.37             | -                 | -                 | -                | -                 | -                 | -                | -                 | -                 | -                | -                 | 1095              | 0                | 0.00              | 235               | 0                | 0.00              | 129               | 83               | 0.39             | 0.00             | 0.00             | 0.20 |
| 1    | 13  | 27506273        | 27506274       | 13  | 28608273       | 28608274      | -                | GTACTCATTATCTGA                              | 5220              | 0                 | 0.00             | 2998              | 0                 | 0.00             | 4198              | 0                 | 0.00             | -                 | -                 | -                | -                 | -                 | -                | -                 | -                 | -                | 1907              | 239               | 0.11             | 721               | 413               | 0.36             | 690               | 317               | 0.31             | 0.06             | 0.18             | 0.16             |      |
| 3    | 16  | 57198624        | 57198634       | 16  | 58641123       | 58641133      | ATATGGATAGT      | CCCC                                         | 8413              | 0                 | 0.00             | 6845              | 0                 | 0.00             | 6152              | 0                 | 0.00             | -                 | -                 | -                | -                 | -                 | -                | -                 | -                 | -                | 2054              | 0                 | 0.00             | 688               | 1                 | 0.00             | 338               | 147               | 0.30             | 0.00             | 0.00             | 0.15             |      |
| 1    | 20  | 43115216        | 43115217       | 20  | 43681802       | 43681803      | -                | GAGCGCGGGGC                                  | 3017              | 0                 | 0.00             | 3271              | 0                 | 0.00             | 1757              | 569               | 0.24             | -                 | -                 | -                | -                 | -                 | -                | -                 | -                 | -                | -                 | 2205              | 0                | 0.00              | 1586              | 0                | 0.00              | 967               | 256              | 0.21             | 0.00             | 0.00             | 0.23 |
| 3    | 21  | 45384952        | 45384953       | 21  | 46560524       | 46560525      | -                | GTA                                          | 7791              | 1882              | 0.19             | 3408              | 3305              | 0.49             | 3658              | 2297              | 0.39             | -                 | -                 | -                | -                 | -                 | -                | -                 | -                 | -                | -                 | 1459              | 157              | 0.10              | 681               | 279              | 0.29              | 929               | 293              | 0.24             | 0.15             | 0.39             | 0.31 |



**Supplementary Table 5c.** Summary information for clusters in primary tumor and relapse samples in UPN 933124.

| ID   | UPN    | Cluster  | Primary Tumor Variant Allele Frequency(%) | Relapse Variant Allele Frequency(%) | Normal Variant Allele Frequency (%) |
|------|--------|----------|-------------------------------------------|-------------------------------------|-------------------------------------|
| AML1 | 933124 | Cluster1 | 46.86                                     | 42.23                               | 14.73                               |
| AML1 | 933124 | Cluster2 | 24.89                                     | 0.24                                | -                                   |
| AML1 | 933124 | Cluster3 | 16                                        | 40.04                               | -                                   |
| AML1 | 933124 | Cluster4 | 2.39                                      | 38.53                               | -                                   |
| AML1 | 933124 | Cluster5 | 0.04                                      | 39.65                               | -                                   |

**Supplementary Table 5d.** Existing copy number annotation for five low-level mutations found in 933124.

| Tier | Chr | Start (NCBI 36) | Stop (NCBI 36) | Chr | Start (GRCh37) | Stop (GRCh37) | Reference allele | Variant allele | Classification | Normal copy number | Tumor copy number | Relapse copy number | Annotation Notes                                                                                          |
|------|-----|-----------------|----------------|-----|----------------|---------------|------------------|----------------|----------------|--------------------|-------------------|---------------------|-----------------------------------------------------------------------------------------------------------|
| 1    | 16  | 15030292        | 15030292       | 16  | 15122791       | 15122791      | G                | A              | Low-level      | 2                  | 2                 | 2                   | Segmental duplication. Multiple CNPs in UCSC.                                                             |
| 2    | X   | 135056937       | 135056937      | X   | 135229271      | 135229271     | C                | G              | Low-level      | 2                  | 2                 | 2                   | In HgSV discordant track for CEPH individual as a deletion. No other annotation                           |
| 3    | 16  | 69454209        | 69454209       | 16  | 70896708       | 70896708      | A                | G              | Low-level      | 4.07               | 3.95              | 4.17                | Known copy number polymorphism; in DGV according to UCSC<br>Segmental duplication. Multiple CNPs in UCSC. |
| 3    | 17  | 22336285        | 22336285       | 17  | 25312158       | 25312158      | G                | T              | Low-level      | 24.85              | 21.67             | 19.69               |                                                                                                           |
| 3    | X   | 12406196        | 12406196       | X   | 12496275       | 12496275      | G                | T              | Low-level      | 2                  | 2                 | 2                   | Copy number deletion reported in two Encode cancer cell lines                                             |

**Supplementary Table 6a.** Somatic point mutations and indels from UPN 400220 tumor-relapse pair used for mutation spectrum and clonality analyses. Mutations identified in the relapse sample with <2% allele frequencies in the primary tumor were classified as relapse-specific.

| Chr | Start (NCBI 36) | Start (GRCh37) | Ref | Var | NormalRefReads | NormalVarReads | NormalVarFreq | TumorRefReads | TumorVarReads | TumorVarFreq | RelapseRefReads | RelapseVarReads | RelapseVarFreq | NormalCN | TumorCN | RelapseCN | Tier  | Classification   | # of samples recurrent (out of 200) |
|-----|-----------------|----------------|-----|-----|----------------|----------------|---------------|---------------|---------------|--------------|-----------------|-----------------|----------------|----------|---------|-----------|-------|------------------|-------------------------------------|
| 1   | 105196784       | 105395261      | A   | C   | 571            | 41             | 0.07          | 350           | 305           | 0.47         | 299             | 219             | 0.42           | 2        | 2       | 2         | tier3 | shared           | 1                                   |
| 1   | 105905196       | 106103673      | C   | A   | 393            | 0              | 0.00          | 470           | 0             | 0.00         | 280             | 38              | 0.12           | 2        | 2       | 2         | tier3 | relapse-specific | 1                                   |
| 1   | 107653116       | 107851593      | C   | A   | 578            | 36             | 0.06          | 493           | 329           | 0.40         | 358             | 204             | 0.36           | 2        | 2       | 2         | tier3 | shared           | 1                                   |
| 1   | 114603068       | 114801545      | C   | T   | 670            | 55             | 0.08          | 522           | 462           | 0.47         | 447             | 260             | 0.37           | 2        | 2       | 2         | tier3 | shared           | 1                                   |
| 1   | 117954113       | 118152590      | -   | CTT | 468            | 21             | 0.04          | 341           | 222           | 0.39         | 273             | 117             | 0.30           | 2        | 2       | 2         | tier3 | shared           | 0                                   |
| 1   | 158409868       | 160143244      | T   | C   | 589            | 40             | 0.06          | 378           | 316           | 0.46         | 387             | 228             | 0.37           | 2        | 2       | 2         | tier3 | shared           | 0                                   |
| 1   | 164924681       | 166658057      | T   | C   | 610            | 49             | 0.07          | 516           | 452           | 0.47         | 418             | 224             | 0.35           | 2        | 2       | 2         | tier3 | shared           | 0                                   |
| 1   | 167212445       | 168945821      | G   | T   | 674            | 45             | 0.06          | 526           | 449           | 0.46         | 470             | 263             | 0.36           | 2        | 2       | 2         | tier3 | shared           | 0                                   |
| 1   | 174612237       | 176345614      | T   | G   | 628            | 38             | 0.06          | 513           | 344           | 0.40         | 401             | 249             | 0.38           | 2        | 2       | 2         | tier3 | shared           | 0                                   |
| 1   | 175056645       | 176790022      | A   | G   | 739            | 59             | 0.07          | 479           | 451           | 0.48         | 434             | 282             | 0.39           | 2        | 2       | 2         | tier2 | shared           | 2                                   |
| 1   | 175979341       | 177712718      | A   | G   | 506            | 30             | 0.06          | 363           | 295           | 0.45         | 323             | 190             | 0.37           | 2        | 2       | 2         | tier3 | shared           | 1                                   |
| 1   | 189339598       | 191072975      | A   | G   | 557            | 32             | 0.05          | 389           | 271           | 0.41         | 304             | 170             | 0.36           | 2        | 2       | 2         | tier3 | shared           | 0                                   |
| 1   | 195382470       | 197115847      | C   | T   | 448            | 35             | 0.07          | 276           | 288           | 0.51         | 223             | 125             | 0.36           | 2        | 2       | 2         | tier2 | shared           | 0                                   |
| 1   | 199100456       | 200833833      | C   | T   | 473            | 39             | 0.08          | 353           | 264           | 0.43         | 276             | 147             | 0.35           | 2        | 2       | 2         | tier3 | shared           | 0                                   |
| 1   | 202854975       | 204588352      | G   | A   | 481            | 36             | 0.07          | 324           | 258           | 0.44         | 246             | 161             | 0.40           | 2        | 2       | 2         | tier1 | shared           | 1                                   |
| 1   | 207486021       | 209419398      | G   | A   | 628            | 38             | 0.06          | 413           | 301           | 0.42         | 383             | 205             | 0.35           | 2        | 2       | 2         | tier3 | shared           | 0                                   |
| 1   | 213073767       | 215007144      | G   | A   | 487            | 36             | 0.07          | 364           | 291           | 0.44         | 282             | 153             | 0.35           | 2        | 2       | 2         | tier3 | shared           | 0                                   |
| 1   | 22173237        | 22300650       | G   | A   | 820            | 29             | 0.03          | 648           | 213           | 0.25         | 495             | 145             | 0.23           | 2        | 2       | 2         | tier2 | shared           | 0                                   |
| 1   | 244551235       | 246484612      | C   | T   | 573            | 55             | 0.09          | 446           | 326           | 0.42         | 347             | 199             | 0.36           | 2        | 2       | 2         | tier3 | shared           | 0                                   |
| 1   | 30665401        | 30892814       | C   | T   | 589            | 31             | 0.05          | 384           | 312           | 0.45         | 324             | 188             | 0.37           | 2        | 2       | 2         | tier3 | shared           | 1                                   |
| 1   | 41737443        | 41964856       | G   | A   | 568            | 31             | 0.05          | 443           | 330           | 0.43         | 312             | 227             | 0.42           | 2        | 2       | 2         | tier3 | shared           | 0                                   |
| 1   | 49957752        | 50185165       | G   | A   | 682            | 49             | 0.07          | 541           | 418           | 0.44         | 473             | 278             | 0.37           | 2        | 2       | 2         | tier3 | shared           | 0                                   |
| 1   | 5687865         | 5765278        | G   | A   | 373            | 25             | 0.06          | 232           | 152           | 0.40         | 185             | 94              | 0.34           | 2        | 2       | 2         | tier2 | shared           | 1                                   |
| 1   | 70152592        | 70380004       | G   | A   | 583            | 41             | 0.07          | 390           | 325           | 0.45         | 318             | 199             | 0.38           | 2        | 2       | 2         | tier2 | shared           | 2                                   |
| 1   | 8042643         | 8120056        | G   | A   | 572            | 43             | 0.07          | 415           | 333           | 0.45         | 361             | 206             | 0.36           | 2        | 2       | 2         | tier3 | shared           | 0                                   |
| 1   | 80774045        | 81001457       | T   | C   | 546            | 46             | 0.08          | 412           | 345           | 0.46         | 372             | 204             | 0.35           | 2        | 2       | 2         | tier3 | shared           | 0                                   |
| 1   | 97674645        | 97902057       | G   | C   | 693            | 52             | 0.07          | 520           | 438           | 0.46         | 445             | 265             | 0.37           | 2        | 2       | 2         | tier3 | shared           | 0                                   |
| 10  | 109432943       | 109442953      | A   | T   | 580            | 35             | 0.06          | 433           | 318           | 0.42         | 368             | 211             | 0.36           | 2        | 2       | 2         | tier3 | shared           | 1                                   |

|    |           |           |   |        |     |    |      |     |     |      |     |     |      |   |   |   |       |                  |    |
|----|-----------|-----------|---|--------|-----|----|------|-----|-----|------|-----|-----|------|---|---|---|-------|------------------|----|
| 10 | 112925930 | 112935940 | T | G      | 615 | 47 | 0.07 | 525 | 390 | 0.43 | 397 | 228 | 0.36 | 2 | 2 | 2 | tier3 | shared           | 1  |
| 10 | 119239116 | 119249126 | T | C      | 685 | 37 | 0.05 | 497 | 451 | 0.48 | 469 | 278 | 0.37 | 2 | 2 | 2 | tier1 | shared           | 0  |
| 10 | 14343374  | 14303368  | C | T      | 512 | 45 | 0.08 | 385 | 341 | 0.47 | 371 | 218 | 0.37 | 2 | 2 | 2 | tier3 | shared           | 0  |
| 10 | 15469409  | 15429403  | C | T      | 606 | 49 | 0.07 | 412 | 309 | 0.43 | 355 | 194 | 0.35 | 2 | 2 | 2 | tier3 | shared           | 1  |
| 10 | 21723192  | 21683186  | G | A      | 396 | 29 | 0.07 | 226 | 194 | 0.46 | 233 | 116 | 0.33 | 2 | 2 | 2 | tier2 | shared           | 0  |
| 10 | 2310893   | 2320893   | C | T      | 411 | 21 | 0.05 | 261 | 219 | 0.46 | 234 | 134 | 0.36 | 2 | 2 | 2 | tier3 | shared           | 1  |
| 10 | 24317005  | 24276999  | C | T      | 373 | 20 | 0.05 | 233 | 142 | 0.38 | 194 | 96  | 0.33 | 2 | 2 | 2 | tier3 | shared           | 2  |
| 10 | 36300363  | 36260357  | C | T      | 612 | 0  | 0.00 | 759 | 0   | 0.00 | 511 | 61  | 0.11 | 2 | 2 | 2 | tier3 | relapse-specific | 1  |
| 10 | 445252    | 455252    | C | T      | 439 | 23 | 0.05 | 281 | 200 | 0.42 | 248 | 135 | 0.35 | 2 | 2 | 2 | tier2 | shared           | 2  |
| 10 | 53994688  | 54324682  | G | -      | 500 | 24 | 0.05 | 364 | 252 | 0.41 | 300 | 170 | 0.36 | 2 | 2 | 2 | tier3 | shared           | 1  |
| 10 | 69053381  | 69383375  | C | A      | 536 | 36 | 0.06 | 404 | 323 | 0.44 | 358 | 210 | 0.37 | 2 | 2 | 2 | tier3 | shared           | 1  |
| 10 | 73351816  | 73681810  | C | T      | 595 | 31 | 0.05 | 493 | 310 | 0.39 | 357 | 200 | 0.36 | 2 | 2 | 2 | tier3 | shared           | 0  |
| 10 | 83385703  | 83395723  | A | T      | 480 | 32 | 0.06 | 317 | 287 | 0.48 | 271 | 155 | 0.36 | 2 | 2 | 2 | tier3 | shared           | 1  |
| 11 | 124756282 | 125251072 | - | TGACCA | 542 | 23 | 0.04 | 355 | 247 | 0.41 | 315 | 135 | 0.30 | 2 | 2 | 2 | tier2 | shared           | 0  |
| 11 | 127853905 | 128348695 | A | G      | 698 | 52 | 0.07 | 552 | 387 | 0.41 | 477 | 243 | 0.34 | 2 | 2 | 2 | tier3 | shared           | 0  |
| 11 | 12871691  | 12915115  | G | A      | 532 | 20 | 0.04 | 280 | 203 | 0.42 | 236 | 142 | 0.38 | 2 | 2 | 2 | tier3 | shared           | 0  |
| 11 | 130217645 | 130712435 | T | G      | 578 | 38 | 0.06 | 368 | 303 | 0.45 | 340 | 174 | 0.34 | 2 | 2 | 2 | tier3 | shared           | 0  |
| 11 | 13467397  | 13510821  | G | A      | 503 | 0  | 0.00 | 696 | 0   | 0.00 | 436 | 65  | 0.13 | 2 | 2 | 2 | tier3 | relapse-specific | 0  |
| 11 | 28296404  | 28339828  | G | A      | 313 | 25 | 0.07 | 230 | 158 | 0.41 | 203 | 106 | 0.34 | 2 | 2 | 2 | tier3 | shared           | 0  |
| 11 | 32370187  | 32413611  | C | T      | 549 | 33 | 0.06 | 394 | 292 | 0.43 | 327 | 195 | 0.37 | 2 | 2 | 2 | tier1 | shared           | 12 |
| 11 | 34548817  | 34592241  | C | A      | 585 | 43 | 0.07 | 365 | 365 | 0.50 | 300 | 197 | 0.40 | 2 | 2 | 2 | tier3 | shared           | 1  |
| 11 | 35949062  | 35992486  | G | -      | 543 | 51 | 0.09 | 382 | 316 | 0.45 | 336 | 182 | 0.35 | 2 | 2 | 2 | tier2 | shared           | 1  |
| 11 | 69669846  | 69992198  | C | T      | 657 | 56 | 0.08 | 468 | 361 | 0.44 | 327 | 214 | 0.40 | 2 | 2 | 2 | tier3 | shared           | 1  |
| 11 | 75568902  | 75891254  | T | A      | 394 | 45 | 0.10 | 242 | 289 | 0.54 | 246 | 184 | 0.43 | 2 | 2 | 2 | tier3 | shared           | 0  |
| 11 | 83201983  | 83524335  | C | T      | 687 | 40 | 0.06 | 556 | 423 | 0.43 | 455 | 267 | 0.37 | 2 | 2 | 2 | tier3 | shared           | 0  |
| 11 | 90731004  | 91091356  | C | T      | 504 | 23 | 0.04 | 400 | 247 | 0.38 | 274 | 167 | 0.38 | 2 | 2 | 2 | tier2 | shared           | 1  |
| 11 | 9088726   | 9132150   | G | A      | 702 | 37 | 0.05 | 504 | 352 | 0.41 | 388 | 230 | 0.37 | 2 | 2 | 2 | tier3 | shared           | 1  |
| 11 | 92651150  | 93011502  | C | A      | 457 | 36 | 0.07 | 312 | 244 | 0.44 | 245 | 153 | 0.38 | 2 | 2 | 2 | tier3 | shared           | 1  |
| 12 | 10043169  | 10151902  | T | C      | 604 | 41 | 0.06 | 476 | 436 | 0.48 | 413 | 237 | 0.36 | 2 | 2 | 2 | tier3 | shared           | 0  |
| 12 | 104412753 | 105888623 | G | T      | 714 | 44 | 0.06 | 452 | 423 | 0.48 | 442 | 280 | 0.39 | 2 | 2 | 2 | tier3 | shared           | 1  |
| 12 | 104628978 | 106104848 | G | T      | 624 | 39 | 0.06 | 476 | 446 | 0.48 | 441 | 262 | 0.37 | 2 | 2 | 2 | tier3 | shared           | 1  |
| 12 | 16142063  | 16250796  | C | G      | 645 | 39 | 0.06 | 454 | 377 | 0.45 | 400 | 217 | 0.35 | 2 | 2 | 2 | tier3 | shared           | 1  |
| 12 | 18881529  | 18990262  | T | G      | 640 | 46 | 0.07 | 503 | 399 | 0.44 | 416 | 259 | 0.38 | 2 | 2 | 2 | tier2 | shared           | 0  |
| 12 | 23767511  | 23876244  | G | A      | 507 | 27 | 0.05 | 380 | 254 | 0.40 | 287 | 138 | 0.32 | 2 | 2 | 2 | tier3 | shared           | 1  |
| 12 | 36181843  | 37895576  | C | A      | 365 | 0  | 0.00 | 429 | 0   | 0.00 | 329 | 60  | 0.15 | 2 | 2 | 2 | tier3 | relapse-specific | 1  |
| 12 | 41180619  | 42894352  | G | A      | 584 | 36 | 0.06 | 385 | 358 | 0.48 | 316 | 187 | 0.37 | 2 | 2 | 2 | tier3 | shared           | 0  |
| 12 | 48009870  | 49723603  | G | T      | 674 | 53 | 0.07 | 428 | 414 | 0.49 | 416 | 216 | 0.34 | 2 | 2 | 2 | tier2 | shared           | 1  |
| 12 | 5273188   | 5402927   | G | T      | 646 | 50 | 0.07 | 494 | 365 | 0.42 | 432 | 244 | 0.36 | 2 | 2 | 2 | tier3 | shared           | 0  |
| 12 | 67316409  | 69030142  | A | G      | 648 | 0  | 0.00 | 846 | 1   | 0.00 | 504 | 44  | 0.08 | 2 | 2 | 2 | tier2 | relapse-specific | 1  |
| 12 | 70956260  | 72669993  | C | G      | 664 | 44 | 0.06 | 444 | 451 | 0.50 | 359 | 206 | 0.36 | 2 | 2 | 2 | tier2 | shared           | 0  |

|    |           |           |   |                                                                            |     |    |      |     |     |      |     |     |      |   |   |   |       |                  |    |
|----|-----------|-----------|---|----------------------------------------------------------------------------|-----|----|------|-----|-----|------|-----|-----|------|---|---|---|-------|------------------|----|
| 12 | 72731206  | 74444939  | - | GATGAAGT                                                                   | 474 | 33 | 0.07 | 333 | 213 | 0.39 | 294 | 125 | 0.30 | 2 | 2 | 2 | tier3 | shared           | 1  |
| 12 | 80233010  | 81708879  | C | G                                                                          | 441 | 29 | 0.06 | 304 | 223 | 0.42 | 252 | 151 | 0.37 | 2 | 2 | 2 | tier3 | shared           | 0  |
| 12 | 95491709  | 96967578  | C | T                                                                          | 670 | 47 | 0.07 | 492 | 367 | 0.43 | 437 | 265 | 0.38 | 2 | 2 | 2 | tier3 | shared           | 0  |
| 13 | 112600111 | 113552110 | G | A                                                                          | 556 | 48 | 0.08 | 402 | 295 | 0.42 | 382 | 123 | 0.24 | 2 | 2 | 2 | tier3 | shared           | 1  |
| 13 | 18521192  | 19623192  | C | T                                                                          | 208 | 9  | 0.04 | 117 | 97  | 0.45 | 73  | 75  | 0.51 | 2 | 2 | 2 | tier3 | shared           | 0  |
| 13 | 27294628  | 28396628  | C | T<br>GGCGATATTCATATT<br>CTCTGAAATCAACG<br>TAGAAGTACTCATTA<br>TCTGAGGAGCCGG | 448 | 13 | 0.03 | 387 | 234 | 0.38 | 340 | 108 | 0.24 | 2 | 2 | 2 | tier2 | shared           | 0  |
| 13 | 27506258  | 28608258  | - |                                                                            | 228 | 39 | 0.15 | 145 | 226 | 0.61 | 108 | 196 | 0.64 | 2 | 2 | 2 | tier1 | shared           | 50 |
| 13 | 30620781  | 31722781  | T | C                                                                          | 404 | 21 | 0.05 | 278 | 200 | 0.42 | 240 | 93  | 0.28 | 2 | 2 | 2 | tier3 | shared           | 0  |
| 13 | 52627792  | 53729791  | G | A                                                                          | 594 | 46 | 0.07 | 410 | 366 | 0.47 | 277 | 276 | 0.50 | 2 | 2 | 2 | tier3 | shared           | 0  |
| 13 | 57520872  | 58622871  | G | T                                                                          | 502 | 24 | 0.05 | 336 | 304 | 0.48 | 215 | 218 | 0.50 | 2 | 2 | 2 | tier3 | shared           | 1  |
| 13 | 63492022  | 64594021  | G | A                                                                          | 557 | 37 | 0.06 | 379 | 339 | 0.47 | 244 | 299 | 0.55 | 2 | 2 | 2 | tier3 | shared           | 0  |
| 13 | 77038729  | 78140728  | T | G                                                                          | 559 | 0  | 0.00 | 773 | 0   | 0.00 | 551 | 77  | 0.12 | 2 | 2 | 2 | tier3 | relapse-specific | 1  |
| 13 | 81847267  | 82949266  | G | A                                                                          | 565 | 32 | 0.05 | 453 | 272 | 0.38 | 417 | 167 | 0.29 | 2 | 2 | 2 | tier3 | shared           | 1  |
| 13 | 89301744  | 90503743  | A | C                                                                          | 529 | 40 | 0.07 | 307 | 321 | 0.51 | 215 | 246 | 0.53 | 2 | 2 | 2 | tier3 | shared           | 0  |
| 13 | 89576015  | 90778014  | G | T                                                                          | 640 | 33 | 0.05 | 445 | 299 | 0.40 | 441 | 139 | 0.24 | 2 | 2 | 2 | tier3 | shared           | 0  |
| 13 | 89768066  | 90970065  | A | G                                                                          | 414 | 37 | 0.08 | 154 | 175 | 0.53 | 140 | 147 | 0.51 | 2 | 2 | 2 | tier3 | shared           | 1  |
| 13 | 91491784  | 92693783  | A | G                                                                          | 610 | 1  | 0.00 | 755 | 0   | 0.00 | 475 | 65  | 0.12 | 2 | 2 | 2 | tier3 | relapse-specific | 0  |
| 14 | 24812988  | 25743148  | G | A                                                                          | 591 | 43 | 0.07 | 498 | 374 | 0.43 | 433 | 252 | 0.37 | 2 | 2 | 2 | tier3 | shared           | 0  |
| 14 | 25372740  | 26302900  | C | T                                                                          | 584 | 48 | 0.08 | 413 | 353 | 0.46 | 363 | 219 | 0.38 | 2 | 2 | 2 | tier3 | shared           | 0  |
| 14 | 36242523  | 37172772  | G | C                                                                          | 638 | 35 | 0.05 | 474 | 392 | 0.45 | 383 | 190 | 0.33 | 2 | 2 | 2 | tier2 | shared           | 0  |
| 14 | 41568235  | 42498485  | G | A                                                                          | 584 | 31 | 0.05 | 521 | 371 | 0.42 | 405 | 228 | 0.36 | 2 | 2 | 2 | tier3 | shared           | 1  |
| 14 | 50644101  | 51574351  | T | C                                                                          | 637 | 34 | 0.05 | 421 | 351 | 0.45 | 388 | 223 | 0.36 | 2 | 2 | 2 | tier3 | shared           | 0  |
| 14 | 65694596  | 66624843  | C | A                                                                          | 519 | 26 | 0.05 | 420 | 275 | 0.40 | 360 | 203 | 0.36 | 2 | 2 | 2 | tier3 | shared           | 0  |
| 14 | 67106471  | 68036718  | G | A                                                                          | 563 | 38 | 0.06 | 397 | 350 | 0.47 | 331 | 198 | 0.37 | 2 | 2 | 2 | tier1 | shared           | 2  |
| 14 | 91744188  | 92674435  | C | A                                                                          | 536 | 25 | 0.04 | 358 | 324 | 0.48 | 318 | 205 | 0.39 | 2 | 2 | 2 | tier3 | shared           | 0  |
| 14 | 99476952  | 100407199 | G | A                                                                          | 728 | 58 | 0.07 | 525 | 440 | 0.46 | 482 | 298 | 0.38 | 2 | 2 | 2 | tier3 | shared           | 0  |
| 15 | 24251354  | 26700261  | C | A                                                                          | 767 | 55 | 0.07 | 617 | 483 | 0.44 | 575 | 319 | 0.36 | 2 | 2 | 2 | tier2 | shared           | 1  |
| 15 | 25047792  | 27465046  | C | T                                                                          | 733 | 44 | 0.06 | 537 | 389 | 0.42 | 423 | 236 | 0.36 | 2 | 2 | 2 | tier3 | shared           | 1  |
| 15 | 25824399  | 28150804  | C | T                                                                          | 457 | 35 | 0.07 | 326 | 274 | 0.46 | 289 | 186 | 0.39 | 2 | 2 | 2 | tier3 | shared           | 0  |
| 15 | 27767329  | 29980037  | C | A                                                                          | 492 | 32 | 0.06 | 334 | 271 | 0.45 | 250 | 149 | 0.37 | 2 | 2 | 2 | tier3 | shared           | 0  |
| 15 | 35693981  | 37906689  | G | A                                                                          | 587 | 1  | 0.00 | 653 | 1   | 0.00 | 420 | 65  | 0.13 | 2 | 2 | 2 | tier3 | relapse-specific | 1  |
| 15 | 37389389  | 39602097  | C | T                                                                          | 756 | 41 | 0.05 | 550 | 474 | 0.46 | 433 | 253 | 0.37 | 2 | 2 | 2 | tier3 | shared           | 1  |
| 15 | 43014382  | 45227090  | G | T                                                                          | 543 | 41 | 0.07 | 446 | 273 | 0.38 | 359 | 199 | 0.36 | 2 | 2 | 2 | tier3 | shared           | 1  |
| 15 | 47931525  | 50144233  | C | -                                                                          | 275 | 23 | 0.08 | 197 | 126 | 0.39 | 145 | 80  | 0.36 | 2 | 2 | 2 | tier2 | shared           | 0  |
| 15 | 49479651  | 51692359  | C | A                                                                          | 638 | 41 | 0.06 | 491 | 380 | 0.44 | 406 | 266 | 0.40 | 2 | 2 | 2 | tier3 | shared           | 0  |
| 15 | 56011723  | 58224431  | C | T                                                                          | 470 | 24 | 0.05 | 394 | 290 | 0.42 | 354 | 165 | 0.32 | 2 | 2 | 2 | tier3 | shared           | 0  |
| 15 | 58437648  | 60650356  | C | T                                                                          | 590 | 38 | 0.06 | 400 | 306 | 0.43 | 302 | 175 | 0.37 | 2 | 2 | 2 | tier2 | shared           | 0  |
| 15 | 62822332  | 65035279  | G | A                                                                          | 594 | 39 | 0.06 | 353 | 258 | 0.42 | 282 | 156 | 0.36 | 2 | 2 | 2 | tier3 | shared           | 1  |
| 15 | 68511669  | 70724615  | T | G                                                                          | 616 | 59 | 0.09 | 431 | 431 | 0.50 | 397 | 241 | 0.38 | 2 | 2 | 2 | tier3 | shared           | 1  |

|    |           |           |   |   |     |    |      |     |     |      |     |     |      |   |   |      |       |                  |   |
|----|-----------|-----------|---|---|-----|----|------|-----|-----|------|-----|-----|------|---|---|------|-------|------------------|---|
| 15 | 89955134  | 92154130  | G | A | 654 | 60 | 0.08 | 432 | 359 | 0.45 | 400 | 230 | 0.37 | 2 | 2 | 2    | tier3 | shared           | 1 |
| 15 | 94882853  | 97081849  | C | T | 745 | 39 | 0.05 | 472 | 347 | 0.42 | 376 | 187 | 0.33 | 2 | 2 | 2    | tier2 | shared           | 1 |
| 15 | 96495601  | 98678078  | C | T | 688 | 0  | 0.00 | 799 | 0   | 0.00 | 531 | 78  | 0.13 | 2 | 2 | 2    | tier2 | relapse-specific | 0 |
| 16 | 30039332  | 30131831  | A | - | 302 | 23 | 0.07 | 197 | 202 | 0.51 | 167 | 143 | 0.46 | 2 | 2 | 2    | tier2 | shared           | 0 |
| 16 | 59035934  | 60478433  | A | T | 557 | 28 | 0.05 | 415 | 323 | 0.44 | 354 | 170 | 0.32 | 2 | 2 | 2    | tier3 | shared           | 1 |
| 16 | 63669317  | 65111816  | G | C | 671 | 46 | 0.06 | 499 | 414 | 0.45 | 415 | 235 | 0.36 | 2 | 2 | 2    | tier3 | shared           | 0 |
| 16 | 9862551   | 9955050   | G | A | 493 | 27 | 0.05 | 357 | 300 | 0.46 | 315 | 197 | 0.38 | 2 | 2 | 2    | tier3 | shared           | 0 |
| 17 | 17733750  | 17793025  | C | T | 359 | 20 | 0.05 | 230 | 211 | 0.48 | 236 | 132 | 0.36 | 2 | 2 | 2    | tier3 | shared           | 0 |
| 17 | 2582250   | 2635500   | C | T | 389 | 23 | 0.06 | 284 | 240 | 0.46 | 268 | 149 | 0.36 | 2 | 2 | 2    | tier3 | shared           | 0 |
| 17 | 61881559  | 64451097  | C | T | 416 | 22 | 0.05 | 291 | 211 | 0.42 | 262 | 143 | 0.35 | 2 | 2 | 2    | tier3 | shared           | 0 |
| 17 | 73286340  | 75774745  | G | A | 503 | 38 | 0.07 | 355 | 241 | 0.40 | 261 | 144 | 0.36 | 2 | 2 | 2    | tier3 | shared           | 1 |
| 18 | 13420874  | 13430874  | C | A | 268 | 23 | 0.08 | 148 | 177 | 0.54 | 123 | 87  | 0.41 | 2 | 2 | 2    | tier3 | shared           | 1 |
| 18 | 3829146   | 3839146   | T | C | 550 | 31 | 0.05 | 435 | 348 | 0.44 | 393 | 189 | 0.32 | 2 | 2 | 2    | tier3 | shared           | 0 |
| 18 | 38616423  | 40362425  | G | A | 513 | 18 | 0.03 | 192 | 137 | 0.42 | 193 | 142 | 0.42 | 2 | 2 | 2    | tier2 | shared           | 0 |
| 18 | 47832910  | 49578912  | G | T | 631 | 37 | 0.06 | 488 | 316 | 0.39 | 376 | 224 | 0.37 | 2 | 2 | 2    | tier3 | shared           | 1 |
| 18 | 5127130   | 5137130   | C | A | 735 | 55 | 0.07 | 529 | 438 | 0.45 | 446 | 287 | 0.39 | 2 | 2 | 2    | tier3 | shared           | 0 |
| 18 | 54996149  | 56845169  | G | A | 511 | 40 | 0.07 | 310 | 287 | 0.48 | 304 | 145 | 0.32 | 2 | 2 | 2    | tier2 | shared           | 0 |
| 18 | 60822336  | 62671356  | G | A | 449 | 36 | 0.07 | 239 | 172 | 0.42 | 217 | 102 | 0.32 | 2 | 2 | 2    | tier3 | shared           | 1 |
| 18 | 67016988  | 68866008  | G | C | 499 | 0  | 0.00 | 590 | 0   | 0.00 | 356 | 56  | 0.14 | 2 | 2 | 2    | tier3 | relapse-specific | 1 |
| 18 | 67500844  | 69349864  | G | A | 713 | 46 | 0.06 | 554 | 395 | 0.42 | 473 | 287 | 0.38 | 2 | 2 | 2    | tier3 | shared           | 1 |
| 18 | 74862688  | 76761700  | C | T | 359 | 4  | 0.01 | 423 | 15  | 0.03 | 258 | 48  | 0.16 | 2 | 2 | 2    | tier3 | shared           | 0 |
| 19 | 11013955  | 11152955  | G | A | 653 | 47 | 0.07 | 421 | 348 | 0.45 | 385 | 211 | 0.35 | 2 | 2 | 2    | tier3 | shared           | 0 |
| 19 | 15919303  | 16058303  | C | G | 555 | 2  | 0.00 | 779 | 0   | 0.00 | 438 | 71  | 0.14 | 2 | 2 | 2    | tier3 | relapse-specific | 1 |
| 19 | 2461036   | 2510036   | C | - | 491 | 24 | 0.05 | 394 | 260 | 0.40 | 301 | 155 | 0.34 | 2 | 2 | 2    | tier3 | shared           | 0 |
| 19 | 3935873   | 3984873   | G | A | 676 | 49 | 0.07 | 419 | 408 | 0.49 | 379 | 218 | 0.37 | 2 | 2 | 1.37 | tier2 | shared           | 0 |
| 19 | 55429652  | 50737840  | C | T | 301 | 14 | 0.04 | 173 | 164 | 0.49 | 159 | 105 | 0.40 | 2 | 2 | 2    | tier3 | shared           | 1 |
| 19 | 59835082  | 55143270  | A | T | 317 | 15 | 0.05 | 222 | 168 | 0.43 | 168 | 110 | 0.40 | 2 | 2 | 2    | tier3 | shared           | 1 |
| 2  | 103478832 | 104112400 | C | A | 384 | 1  | 0.00 | 432 | 0   | 0.00 | 308 | 48  | 0.13 | 2 | 2 | 2    | tier2 | relapse-specific | 1 |
| 2  | 114539392 | 114822922 | G | A | 574 | 39 | 0.06 | 437 | 372 | 0.46 | 391 | 212 | 0.35 | 2 | 2 | 2    | tier2 | shared           | 1 |
| 2  | 121434942 | 121718472 | G | - | 462 | 35 | 0.07 | 306 | 229 | 0.43 | 244 | 134 | 0.35 | 2 | 2 | 2    | tier3 | shared           | 0 |
| 2  | 126663892 | 126947422 | G | T | 639 | 24 | 0.04 | 461 | 364 | 0.44 | 383 | 248 | 0.39 | 2 | 2 | 2    | tier2 | shared           | 1 |
| 2  | 132963412 | 133246942 | C | T | 271 | 14 | 0.05 | 149 | 106 | 0.42 | 139 | 74  | 0.35 | 2 | 2 | 2    | tier2 | shared           | 0 |
| 2  | 133246731 | 133530261 | A | G | 649 | 41 | 0.06 | 450 | 403 | 0.47 | 433 | 245 | 0.36 | 2 | 2 | 2    | tier3 | shared           | 1 |
| 2  | 135287366 | 135570896 | C | T | 543 | 27 | 0.05 | 355 | 312 | 0.47 | 307 | 157 | 0.34 | 2 | 2 | 2    | tier2 | shared           | 0 |
| 2  | 167372682 | 167664436 | G | A | 434 | 26 | 0.06 | 296 | 209 | 0.41 | 233 | 141 | 0.38 | 2 | 2 | 2    | tier3 | shared           | 1 |
| 2  | 205704415 | 205996170 | G | T | 663 | 39 | 0.06 | 499 | 386 | 0.44 | 373 | 223 | 0.37 | 2 | 2 | 2    | tier3 | shared           | 0 |
| 2  | 20689966  | 20826485  | C | T | 532 | 39 | 0.07 | 360 | 302 | 0.46 | 289 | 166 | 0.36 | 2 | 2 | 2    | tier3 | shared           | 0 |
| 2  | 212759483 | 213051238 | G | A | 601 | 31 | 0.05 | 453 | 359 | 0.44 | 359 | 212 | 0.37 | 2 | 2 | 2    | tier3 | shared           | 0 |
| 2  | 223664729 | 223956485 | G | A | 754 | 50 | 0.06 | 538 | 524 | 0.49 | 483 | 314 | 0.39 | 2 | 2 | 2    | tier3 | shared           | 0 |
| 2  | 236277472 | 236612733 | G | A | 525 | 1  | 0.00 | 614 | 0   | 0.00 | 408 | 57  | 0.12 | 2 | 2 | 2    | tier3 | relapse-specific | 0 |

|    |           |           |   |    |     |    |      |     |     |      |     |     |      |   |      |   |       |                  |    |
|----|-----------|-----------|---|----|-----|----|------|-----|-----|------|-----|-----|------|---|------|---|-------|------------------|----|
| 2  | 236651869 | 236987130 | - | CT | 587 | 34 | 0.05 | 429 | 318 | 0.43 | 358 | 191 | 0.35 | 2 | 2    | 2 | tier3 | shared           | 0  |
| 2  | 26593335  | 26739831  | G | A  | 618 | 53 | 0.08 | 426 | 312 | 0.42 | 345 | 217 | 0.39 | 2 | 2    | 2 | tier2 | shared           | 2  |
| 2  | 29044813  | 29191309  | G | A  | 403 | 31 | 0.07 | 310 | 218 | 0.41 | 268 | 163 | 0.38 | 2 | 2    | 2 | tier3 | shared           | 0  |
| 2  | 30465534  | 30612030  | G | A  | 491 | 24 | 0.05 | 336 | 266 | 0.44 | 279 | 174 | 0.38 | 2 | 2    | 2 | tier3 | shared           | 0  |
| 2  | 31191770  | 31338266  | G | C  | 640 | 68 | 0.10 | 508 | 455 | 0.47 | 388 | 258 | 0.40 | 2 | 2    | 2 | tier3 | shared           | 0  |
| 2  | 41102181  | 41248677  | C | T  | 686 | 55 | 0.07 | 482 | 472 | 0.49 | 440 | 253 | 0.37 | 2 | 2    | 2 | tier2 | shared           | 0  |
| 2  | 4688780   | 4710905   | A | -  | 637 | 40 | 0.06 | 499 | 355 | 0.42 | 379 | 197 | 0.34 | 2 | 2    | 2 | tier3 | shared           | 0  |
| 2  | 48298360  | 48444856  | A | G  | 405 | 20 | 0.05 | 279 | 190 | 0.41 | 219 | 128 | 0.37 | 2 | 2    | 2 | tier1 | shared           | 1  |
| 2  | 65852014  | 65998510  | C | A  | 577 | 36 | 0.06 | 497 | 343 | 0.41 | 418 | 228 | 0.35 | 2 | 2    | 2 | tier3 | shared           | 1  |
| 2  | 71775215  | 71921707  | T | A  | 544 | 41 | 0.07 | 305 | 269 | 0.47 | 254 | 167 | 0.40 | 2 | 2    | 2 | tier3 | shared           | 4  |
| 2  | 77025856  | 77172348  | C | T  | 627 | 28 | 0.04 | 443 | 303 | 0.41 | 330 | 184 | 0.36 | 2 | 2    | 2 | tier3 | shared           | 0  |
| 2  | 79485391  | 79631883  | G | T  | 616 | 43 | 0.07 | 379 | 320 | 0.46 | 358 | 176 | 0.33 | 2 | 2    | 2 | tier2 | shared           | 1  |
| 2  | 81686313  | 81832802  | A | T  | 538 | 52 | 0.09 | 401 | 308 | 0.43 | 330 | 205 | 0.38 | 2 | 2    | 2 | tier3 | shared           | 0  |
| 2  | 86918974  | 87065463  | C | T  | 339 | 31 | 0.08 | 211 | 199 | 0.49 | 181 | 97  | 0.35 | 2 | 1.25 | 2 | tier3 | shared           | 0  |
| 20 | 11130236  | 11182236  | T | C  | 260 | 22 | 0.08 | 148 | 118 | 0.44 | 115 | 71  | 0.38 | 2 | 2    | 2 | tier3 | shared           | 1  |
| 20 | 15271865  | 15323865  | G | A  | 659 | 58 | 0.08 | 495 | 421 | 0.46 | 470 | 231 | 0.33 | 2 | 2    | 2 | tier3 | shared           | 0  |
| 20 | 43334043  | 43900629  | T | A  | 543 | 30 | 0.05 | 344 | 267 | 0.44 | 312 | 168 | 0.35 | 2 | 2    | 2 | tier3 | shared           | 0  |
| 20 | 46462856  | 47029449  | C | T  | 509 | 42 | 0.08 | 329 | 264 | 0.45 | 299 | 177 | 0.37 | 2 | 2    | 2 | tier3 | shared           | 1  |
| 20 | 51492752  | 52059345  | G | A  | 629 | 31 | 0.05 | 536 | 324 | 0.38 | 387 | 258 | 0.40 | 2 | 2    | 2 | tier3 | shared           | 0  |
| 20 | 58825522  | 59392127  | G | A  | 855 | 53 | 0.06 | 635 | 516 | 0.45 | 538 | 296 | 0.35 | 2 | 2    | 2 | tier3 | shared           | 1  |
| 20 | 61150611  | 61680166  | C | T  | 358 | 27 | 0.07 | 217 | 179 | 0.45 | 190 | 108 | 0.36 | 2 | 2    | 2 | tier3 | shared           | 0  |
| 21 | 16218382  | 17296511  | T | C  | 572 | 81 | 0.12 | 79  | 762 | 0.91 | 190 | 458 | 0.71 | 2 | 2    | 2 | tier2 | shared           | 0  |
| 21 | 24493749  | 25571878  | G | T  | 318 | 26 | 0.08 | 191 | 124 | 0.39 | 151 | 89  | 0.37 | 2 | 2    | 2 | tier3 | shared           | 1  |
| 21 | 35181023  | 36259153  | G | A  | 312 | 36 | 0.10 | 39  | 368 | 0.90 | 70  | 233 | 0.77 | 2 | 2    | 2 | tier1 | shared           | 16 |
| 22 | 40742783  | 42412837  | T | C  | 656 | 52 | 0.07 | 469 | 381 | 0.45 | 404 | 255 | 0.39 | 2 | 2    | 2 | tier3 | shared           | 0  |
| 22 | 43706552  | 45327888  | G | T  | 426 | 33 | 0.07 | 279 | 249 | 0.47 | 212 | 119 | 0.36 | 2 | 2    | 2 | tier3 | shared           | 0  |
| 22 | 46504211  | 48125547  | G | A  | 395 | 0  | 0.00 | 504 | 0   | 0.00 | 295 | 31  | 0.10 | 2 | 2    | 2 | tier3 | relapse-specific | 1  |
| 22 | 47104940  | 48726276  | C | T  | 568 | 67 | 0.11 | 354 | 276 | 0.44 | 296 | 178 | 0.38 | 2 | 2    | 2 | tier3 | shared           | 1  |
| 3  | 117821246 | 116338556 | C | T  | 611 | 38 | 0.06 | 420 | 336 | 0.44 | 312 | 203 | 0.39 | 2 | 2    | 2 | tier3 | shared           | 0  |
| 3  | 137858004 | 136375314 | C | T  | 366 | 31 | 0.08 | 277 | 230 | 0.45 | 270 | 129 | 0.32 | 2 | 2    | 2 | tier2 | shared           | 0  |
| 3  | 140894661 | 139411971 | T | G  | 561 | 49 | 0.08 | 417 | 375 | 0.47 | 342 | 188 | 0.35 | 2 | 2    | 2 | tier3 | shared           | 0  |
| 3  | 144167201 | 142684511 | C | G  | 372 | 31 | 0.08 | 311 | 234 | 0.43 | 254 | 146 | 0.37 | 2 | 2    | 2 | tier3 | shared           | 1  |
| 3  | 157519440 | 156036746 | T | A  | 451 | 34 | 0.07 | 350 | 284 | 0.45 | 286 | 156 | 0.35 | 2 | 2    | 2 | tier3 | shared           | 0  |
| 3  | 160816053 | 159333359 | A | G  | 708 | 41 | 0.05 | 498 | 443 | 0.47 | 466 | 263 | 0.36 | 2 | 2    | 2 | tier2 | shared           | 0  |
| 3  | 166118808 | 164636114 | G | A  | 345 | 23 | 0.06 | 228 | 190 | 0.45 | 206 | 125 | 0.38 | 2 | 2    | 2 | tier3 | shared           | 1  |
| 3  | 16741744  | 16766740  | T | C  | 579 | 42 | 0.07 | 506 | 383 | 0.43 | 404 | 279 | 0.41 | 2 | 2    | 2 | tier3 | shared           | 1  |
| 3  | 21285104  | 21310100  | G | A  | 644 | 37 | 0.05 | 423 | 369 | 0.47 | 332 | 194 | 0.37 | 2 | 2    | 2 | tier3 | shared           | 1  |
| 3  | 47267043  | 47292039  | G | A  | 367 | 32 | 0.08 | 284 | 238 | 0.46 | 224 | 140 | 0.38 | 2 | 2    | 2 | tier1 | shared           | 0  |
| 3  | 55812597  | 55837557  | - | T  | 280 | 39 | 0.12 | 230 | 123 | 0.35 | 160 | 54  | 0.25 | 2 | 2    | 2 | tier3 | shared           | 0  |
| 3  | 62186142  | 62211102  | C | A  | 427 | 36 | 0.08 | 247 | 256 | 0.51 | 306 | 169 | 0.36 | 2 | 2    | 2 | tier3 | shared           | 1  |

|   |           |           |   |   |     |    |      |     |     |      |     |     |      |   |   |   |       |                  |   |
|---|-----------|-----------|---|---|-----|----|------|-----|-----|------|-----|-----|------|---|---|---|-------|------------------|---|
| 3 | 62667097  | 62692057  | C | T | 727 | 55 | 0.07 | 542 | 430 | 0.44 | 449 | 283 | 0.39 | 2 | 2 | 2 | tier2 | shared           | 3 |
| 3 | 78453063  | 78370373  | C | A | 615 | 36 | 0.06 | 511 | 351 | 0.41 | 436 | 239 | 0.35 | 2 | 2 | 2 | tier3 | shared           | 1 |
| 3 | 80944362  | 80861672  | G | A | 231 | 13 | 0.05 | 124 | 96  | 0.44 | 114 | 67  | 0.37 | 2 | 2 | 2 | tier3 | shared           | 0 |
| 3 | 83012162  | 82929472  | G | A | 611 | 53 | 0.08 | 438 | 346 | 0.44 | 367 | 202 | 0.36 | 2 | 2 | 2 | tier3 | shared           | 1 |
| 3 | 84524853  | 84442163  | C | T | 236 | 8  | 0.03 | 99  | 98  | 0.50 | 89  | 43  | 0.33 | 2 | 2 | 2 | tier3 | shared           | 1 |
| 3 | 84703230  | 84620540  | A | T | 713 | 49 | 0.06 | 512 | 417 | 0.45 | 372 | 282 | 0.43 | 2 | 2 | 2 | tier3 | shared           | 1 |
| 3 | 8577158   | 8602158   | C | A | 344 | 20 | 0.05 | 238 | 190 | 0.44 | 193 | 135 | 0.41 | 2 | 2 | 2 | tier3 | shared           | 0 |
| 4 | 103771667 | 103552619 | C | T | 590 | 38 | 0.06 | 341 | 263 | 0.44 | 285 | 170 | 0.37 | 2 | 2 | 2 | tier3 | shared           | 0 |
| 4 | 128375877 | 128156427 | C | T | 559 | 35 | 0.06 | 352 | 245 | 0.41 | 292 | 179 | 0.38 | 2 | 2 | 2 | tier3 | shared           | 1 |
| 4 | 138437576 | 138218126 | A | C | 615 | 51 | 0.08 | 432 | 392 | 0.48 | 420 | 236 | 0.36 | 2 | 2 | 2 | tier2 | shared           | 1 |
| 4 | 149854954 | 149635504 | C | T | 484 | 25 | 0.05 | 363 | 241 | 0.40 | 293 | 148 | 0.34 | 2 | 2 | 2 | tier3 | shared           | 1 |
| 4 | 159757814 | 159538364 | G | A | 573 | 36 | 0.06 | 478 | 348 | 0.42 | 360 | 179 | 0.33 | 2 | 2 | 2 | tier2 | shared           | 0 |
| 4 | 163972670 | 163753220 | G | A | 321 | 20 | 0.06 | 197 | 143 | 0.42 | 172 | 70  | 0.29 | 2 | 2 | 2 | tier3 | shared           | 1 |
| 4 | 182241806 | 182004812 | G | A | 605 | 38 | 0.06 | 399 | 314 | 0.44 | 345 | 192 | 0.36 | 2 | 2 | 2 | tier3 | shared           | 0 |
| 4 | 42878328  | 43183571  | G | A | 510 | 30 | 0.06 | 373 | 235 | 0.39 | 286 | 138 | 0.33 | 2 | 2 | 2 | tier3 | shared           | 1 |
| 4 | 57086890  | 57392133  | T | A | 625 | 35 | 0.05 | 431 | 369 | 0.46 | 359 | 207 | 0.37 | 2 | 2 | 2 | tier3 | shared           | 0 |
| 4 | 57892553  | 58197796  | G | A | 397 | 11 | 0.03 | 360 | 96  | 0.21 | 282 | 65  | 0.19 | 2 | 2 | 2 | tier3 | shared           | 1 |
| 4 | 59692624  | 60010029  | G | T | 573 | 54 | 0.09 | 441 | 356 | 0.45 | 346 | 201 | 0.37 | 2 | 2 | 2 | tier3 | shared           | 1 |
| 4 | 95813425  | 95594402  | G | A | 672 | 56 | 0.08 | 479 | 395 | 0.45 | 453 | 247 | 0.35 | 2 | 2 | 2 | tier2 | shared           | 0 |
| 4 | 9996433   | 10387335  | C | T | 764 | 45 | 0.06 | 540 | 457 | 0.46 | 451 | 278 | 0.38 | 2 | 2 | 2 | tier3 | shared           | 1 |
| 5 | 10128058  | 10075058  | G | A | 171 | 9  | 0.05 | 110 | 71  | 0.39 | 132 | 51  | 0.28 | 2 | 2 | 2 | tier3 | shared           | 1 |
| 5 | 117968777 | 117940878 | C | T | 520 | 0  | 0.00 | 725 | 0   | 0.00 | 430 | 69  | 0.14 | 2 | 2 | 2 | tier3 | relapse-specific | 1 |
| 5 | 120072505 | 120044606 | C | A | 363 | 30 | 0.08 | 330 | 233 | 0.41 | 250 | 149 | 0.37 | 2 | 2 | 2 | tier3 | shared           | 0 |
| 5 | 133094851 | 133066952 | G | A | 670 | 41 | 0.06 | 491 | 387 | 0.44 | 427 | 259 | 0.38 | 2 | 2 | 2 | tier3 | shared           | 1 |
| 5 | 144608757 | 144628564 | A | G | 560 | 25 | 0.04 | 425 | 377 | 0.47 | 351 | 194 | 0.36 | 2 | 2 | 2 | tier3 | shared           | 0 |
| 5 | 151603256 | 151623063 | G | A | 584 | 40 | 0.06 | 454 | 334 | 0.42 | 402 | 238 | 0.37 | 2 | 2 | 2 | tier3 | shared           | 1 |
| 5 | 152414334 | 152434141 | G | A | 615 | 43 | 0.07 | 437 | 331 | 0.43 | 376 | 213 | 0.36 | 2 | 2 | 2 | tier3 | shared           | 1 |
| 5 | 15604235  | 15551235  | C | T | 560 | 56 | 0.09 | 397 | 324 | 0.45 | 289 | 226 | 0.44 | 2 | 2 | 2 | tier3 | shared           | 1 |
| 5 | 163388728 | 163456150 | C | T | 440 | 37 | 0.08 | 308 | 245 | 0.44 | 252 | 123 | 0.33 | 2 | 2 | 2 | tier2 | shared           | 1 |
| 5 | 180444238 | 180511632 | G | A | 492 | 31 | 0.06 | 311 | 220 | 0.41 | 231 | 135 | 0.37 | 2 | 2 | 2 | tier3 | shared           | 0 |
| 5 | 18609048  | 18573291  | C | T | 510 | 43 | 0.08 | 340 | 280 | 0.45 | 364 | 189 | 0.34 | 2 | 2 | 2 | tier3 | shared           | 0 |
| 5 | 21019091  | 20983334  | G | A | 329 | 25 | 0.07 | 240 | 191 | 0.44 | 192 | 125 | 0.39 | 2 | 2 | 2 | tier3 | shared           | 1 |
| 5 | 26999460  | 26963703  | G | A | 564 | 41 | 0.07 | 374 | 320 | 0.46 | 306 | 182 | 0.37 | 2 | 2 | 2 | tier2 | shared           | 0 |
| 5 | 33822985  | 33787228  | G | T | 754 | 39 | 0.05 | 544 | 413 | 0.43 | 472 | 262 | 0.36 | 2 | 2 | 2 | tier3 | shared           | 2 |
| 5 | 51307451  | 51271694  | G | A | 460 | 23 | 0.05 | 404 | 192 | 0.32 | 267 | 142 | 0.35 | 2 | 2 | 2 | tier3 | shared           | 1 |
| 5 | 58678318  | 58642561  | G | A | 611 | 36 | 0.06 | 431 | 318 | 0.42 | 355 | 234 | 0.40 | 2 | 2 | 2 | tier3 | shared           | 0 |
| 5 | 7054382   | 7001382   | G | A | 682 | 53 | 0.07 | 515 | 352 | 0.41 | 420 | 244 | 0.37 | 2 | 2 | 2 | tier3 | shared           | 0 |
| 6 | 102435823 | 102329130 | A | G | 214 | 17 | 0.07 | 83  | 140 | 0.63 | 76  | 59  | 0.44 | 2 | 2 | 2 | tier3 | shared           | 3 |
| 6 | 102637676 | 102530983 | G | T | 642 | 33 | 0.05 | 423 | 280 | 0.40 | 376 | 210 | 0.36 | 2 | 2 | 2 | tier3 | shared           | 3 |
| 6 | 108659871 | 108553178 | T | C | 390 | 35 | 0.08 | 288 | 243 | 0.46 | 256 | 167 | 0.39 | 2 | 2 | 2 | tier3 | shared           | 0 |



|   |           |           |   |                  |     |    |      |      |     |      |     |     |      |   |   |   |       |                  |   |
|---|-----------|-----------|---|------------------|-----|----|------|------|-----|------|-----|-----|------|---|---|---|-------|------------------|---|
| 6 | 112111782 | 112005089 | A | G                | 672 | 33 | 0.05 | 431  | 348 | 0.45 | 374 | 201 | 0.35 | 2 | 2 | 2 | tier3 | shared           | 0 |
| 6 | 117330941 | 117224248 | C | T                | 602 | 0  | 0.00 | 865  | 0   | 0.00 | 570 | 61  | 0.10 | 2 | 2 | 2 | tier3 | relapse-specific | 0 |
| 6 | 129651674 | 129609981 | C | G                | 532 | 41 | 0.07 | 448  | 350 | 0.44 | 384 | 239 | 0.38 | 2 | 2 | 2 | tier3 | shared           | 1 |
| 6 | 133869595 | 133827902 | C | A                | 603 | 37 | 0.06 | 440  | 347 | 0.44 | 347 | 215 | 0.38 | 2 | 2 | 2 | tier3 | shared           | 1 |
| 6 | 136639071 | 136597378 | G | A                | 623 | 18 | 0.03 | 535  | 195 | 0.27 | 561 | 135 | 0.19 | 2 | 2 | 2 | tier1 | shared           | 1 |
| 6 | 138073427 | 138031734 | - | TTAAGGAGGGCGGCAC | 652 | 34 | 0.05 | 526  | 286 | 0.35 | 503 | 178 | 0.26 | 2 | 2 | 2 | tier3 | shared           | 0 |
| 6 | 140834440 | 140792747 | C | T                | 566 | 31 | 0.05 | 437  | 284 | 0.39 | 300 | 160 | 0.35 | 2 | 2 | 2 | tier3 | shared           | 1 |
| 6 | 144959652 | 144917959 | G | T                | 638 | 49 | 0.07 | 452  | 416 | 0.48 | 386 | 210 | 0.35 | 2 | 2 | 2 | tier3 | shared           | 0 |
| 6 | 148467197 | 148425504 | G | C                | 613 | 0  | 0.00 | 788  | 0   | 0.00 | 505 | 58  | 0.10 | 2 | 2 | 2 | tier2 | relapse-specific | 1 |
| 6 | 155039699 | 154998007 | C | G                | 388 | 21 | 0.05 | 295  | 213 | 0.42 | 224 | 118 | 0.35 | 2 | 2 | 2 | tier3 | shared           | 0 |
| 6 | 170584453 | 170742528 | C | A                | 467 | 47 | 0.09 | 351  | 306 | 0.47 | 301 | 189 | 0.39 | 2 | 2 | 2 | tier3 | shared           | 0 |
| 6 | 25534026  | 25426047  | C | T                | 476 | 30 | 0.06 | 372  | 264 | 0.42 | 279 | 156 | 0.36 | 2 | 2 | 2 | tier3 | shared           | 0 |
| 6 | 35320457  | 35212479  | C | T                | 618 | 54 | 0.08 | 403  | 342 | 0.46 | 331 | 197 | 0.37 | 2 | 2 | 2 | tier1 | shared           | 1 |
| 6 | 39215608  | 39107630  | C | T                | 618 | 31 | 0.05 | 423  | 382 | 0.47 | 387 | 233 | 0.38 | 2 | 2 | 2 | tier3 | shared           | 0 |
| 6 | 42172380  | 42064402  | G | T                | 728 | 45 | 0.06 | 533  | 452 | 0.46 | 468 | 244 | 0.34 | 2 | 2 | 2 | tier3 | shared           | 0 |
| 6 | 43917751  | 43809773  | T | C                | 440 | 33 | 0.07 | 296  | 219 | 0.43 | 251 | 132 | 0.34 | 2 | 2 | 2 | tier2 | shared           | 1 |
| 6 | 48934792  | 48826833  | C | T                | 498 | 23 | 0.04 | 338  | 289 | 0.46 | 283 | 164 | 0.37 | 2 | 2 | 2 | tier3 | shared           | 0 |
| 6 | 50327431  | 50219472  | C | T                | 597 | 2  | 0.00 | 777  | 34  | 0.04 | 490 | 71  | 0.13 | 2 | 2 | 2 | tier3 | shared           | 1 |
| 6 | 54584891  | 54476932  | A | T                | 445 | 34 | 0.07 | 253  | 203 | 0.45 | 273 | 134 | 0.33 | 2 | 2 | 2 | tier3 | shared           | 0 |
| 6 | 62769565  | 62711606  | C | T                | 520 | 31 | 0.06 | 338  | 329 | 0.49 | 318 | 181 | 0.36 | 2 | 2 | 2 | tier3 | shared           | 0 |
| 6 | 69657302  | 69600581  | A | C                | 571 | 43 | 0.07 | 411  | 353 | 0.46 | 307 | 239 | 0.44 | 2 | 2 | 2 | tier2 | shared           | 0 |
| 6 | 72286158  | 72229437  | G | T                | 508 | 42 | 0.08 | 378  | 321 | 0.46 | 344 | 209 | 0.38 | 2 | 2 | 2 | tier3 | shared           | 0 |
| 6 | 74131215  | 74074494  | C | T                | 539 | 36 | 0.06 | 363  | 331 | 0.48 | 305 | 200 | 0.40 | 2 | 2 | 2 | tier3 | shared           | 0 |
| 6 | 87528255  | 87471536  | C | A                | 573 | 38 | 0.06 | 426  | 307 | 0.42 | 352 | 209 | 0.37 | 2 | 2 | 2 | tier3 | shared           | 0 |
| 6 | 91777441  | 91720720  | G | A                | 540 | 29 | 0.05 | 426  | 310 | 0.42 | 314 | 171 | 0.35 | 2 | 2 | 2 | tier3 | shared           | 1 |
| 7 | 11736619  | 11770094  | G | A                | 221 | 11 | 0.05 | 120  | 58  | 0.33 | 81  | 45  | 0.36 | 2 | 2 | 2 | tier3 | shared           | 1 |
| 7 | 120243306 | 120456070 | G | A                | 462 | 0  | 0.00 | 512  | 0   | 0.00 | 334 | 42  | 0.11 | 2 | 2 | 2 | tier2 | relapse-specific | 0 |
| 7 | 125947995 | 126160759 | G | A                | 451 | 35 | 0.07 | 278  | 189 | 0.40 | 272 | 167 | 0.38 | 2 | 2 | 2 | tier3 | shared           | 2 |
| 7 | 134071389 | 134420849 | C | T                | 663 | 51 | 0.07 | 459  | 376 | 0.45 | 417 | 248 | 0.37 | 2 | 2 | 2 | tier3 | shared           | 1 |
| 7 | 134484051 | 134833511 | T | C                | 657 | 42 | 0.06 | 493  | 406 | 0.45 | 398 | 271 | 0.41 | 2 | 2 | 2 | tier3 | shared           | 0 |
| 7 | 141400429 | 141753960 | C | A                | 831 | 0  | 0.00 | 1054 | 0   | 0.00 | 667 | 111 | 0.14 | 2 | 2 | 2 | tier3 | relapse-specific | 1 |
| 7 | 153522252 | 153891319 | G | T                | 655 | 29 | 0.04 | 460  | 318 | 0.41 | 374 | 249 | 0.40 | 2 | 2 | 2 | tier2 | shared           | 2 |
| 7 | 34575612  | 34609087  | C | A                | 617 | 46 | 0.07 | 436  | 347 | 0.44 | 386 | 246 | 0.39 | 2 | 2 | 2 | tier3 | shared           | 0 |
| 7 | 36164668  | 36198143  | T | C                | 691 | 52 | 0.07 | 534  | 416 | 0.44 | 459 | 301 | 0.40 | 2 | 2 | 2 | tier3 | shared           | 0 |
| 7 | 53419185  | 53451691  | A | G                | 425 | 36 | 0.08 | 286  | 247 | 0.46 | 240 | 167 | 0.41 | 2 | 2 | 2 | tier3 | shared           | 0 |
| 7 | 55021646  | 55054152  | C | T                | 642 | 31 | 0.05 | 527  | 380 | 0.42 | 415 | 224 | 0.35 | 2 | 2 | 2 | tier3 | shared           | 2 |
| 7 | 57590107  | 57586165  | G | A                | 528 | 42 | 0.07 | 396  | 286 | 0.42 | 383 | 220 | 0.36 | 2 | 2 | 2 | tier3 | shared           | 1 |
| 7 | 57788624  | 57784682  | A | C                | 343 | 15 | 0.04 | 220  | 168 | 0.43 | 194 | 107 | 0.36 | 2 | 2 | 2 | tier3 | shared           | 1 |
| 7 | 61075177  | 61071235  | T | A                | 190 | 8  | 0.04 | 103  | 88  | 0.46 | 105 | 48  | 0.31 | 2 | 2 | 2 | tier3 | shared           | 1 |
| 7 | 63378125  | 63740690  | C | T                | 554 | 32 | 0.05 | 391  | 316 | 0.45 | 304 | 232 | 0.43 | 2 | 2 | 2 | tier2 | shared           | 0 |

|   |           |           |                 |        |     |    |      |     |     |      |     |     |      |   |      |     |       |                  |   |
|---|-----------|-----------|-----------------|--------|-----|----|------|-----|-----|------|-----|-----|------|---|------|-----|-------|------------------|---|
| 7 | 77408266  | 77570330  | G               | A      | 375 | 30 | 0.07 | 274 | 242 | 0.47 | 208 | 156 | 0.43 | 2 | 2    | 2   | tier3 | shared           | 0 |
| 7 | 79502966  | 79665030  | A               | G      | 743 | 44 | 0.06 | 617 | 510 | 0.45 | 489 | 313 | 0.39 | 2 | 2    | 2   | tier2 | shared           | 1 |
| 8 | 107021016 | 106951840 | G               | A      | 545 | 31 | 0.05 | 430 | 290 | 0.40 | 360 | 188 | 0.34 | 2 | 2    | 2   | tier3 | shared           | 0 |
| 8 | 136135323 | 136066141 | C               | T      | 627 | 48 | 0.07 | 428 | 374 | 0.47 | 315 | 218 | 0.41 | 2 | 2    | 2   | tier2 | shared           | 1 |
| 8 | 137761297 | 137692115 | G               | A      | 835 | 37 | 0.04 | 632 | 486 | 0.43 | 552 | 289 | 0.34 | 2 | 2    | 2   | tier3 | shared           | 1 |
| 8 | 139534894 | 139465712 | A               | G      | 480 | 28 | 0.06 | 289 | 223 | 0.44 | 286 | 138 | 0.33 | 2 | 2    | 2   | tier2 | shared           | 0 |
| 8 | 16022443  | 15978072  | G               | A      | 397 | 27 | 0.06 | 239 | 254 | 0.52 | 199 | 118 | 0.37 | 2 | 2    | 2   | tier1 | shared           | 1 |
| 8 | 23156984  | 23101039  | T               | C      | 382 | 24 | 0.06 | 267 | 200 | 0.43 | 198 | 138 | 0.41 | 2 | 2    | 2   | tier2 | shared           | 0 |
| 8 | 35701905  | 35582363  | G               | A      | 634 | 57 | 0.08 | 479 | 371 | 0.44 | 384 | 229 | 0.37 | 2 | 2    | 2   | tier3 | shared           | 1 |
| 8 | 41907838  | 41788681  | G               | C      | 696 | 47 | 0.06 | 532 | 409 | 0.43 | 445 | 292 | 0.40 | 2 | 2    | 2   | tier2 | shared           | 0 |
| 8 | 65301702  | 65139148  | C               | A      | 530 | 47 | 0.08 | 412 | 325 | 0.44 | 343 | 184 | 0.35 | 2 | 2    | 2   | tier2 | shared           | 1 |
| 8 | 6610082   | 6622672   | T               | C      | 630 | 0  | 0.00 | 805 | 1   | 0.00 | 492 | 95  | 0.16 | 2 | 2    | 2   | tier3 | relapse-specific | 0 |
| 8 | 70296360  | 70133806  | T               | A      | 615 | 42 | 0.06 | 482 | 349 | 0.42 | 382 | 241 | 0.39 | 2 | 2    | 2   | tier3 | shared           | 1 |
| 9 | 103397767 | 104357946 | C               | T      | 682 | 63 | 0.08 | 543 | 460 | 0.46 | 461 | 279 | 0.38 | 2 | 2    | 2   | tier3 | shared           | 1 |
| 9 | 120838579 | 121798758 | G               | A      | 709 | 42 | 0.06 | 433 | 338 | 0.44 | 373 | 196 | 0.34 | 2 | 2    | 2   | tier2 | shared           | 1 |
| 9 | 136294980 | 137155159 | -               | GTCTGT | 465 | 35 | 0.07 | 332 | 219 | 0.40 | 268 | 127 | 0.32 | 2 | 2    | 2   | tier3 | shared           | 1 |
| 9 | 25406366  | 25416366  | G               | T      | 338 | 9  | 0.03 | 227 | 165 | 0.42 | 190 | 111 | 0.37 | 2 | 2    | 2   | tier3 | shared           | 1 |
| 9 | 44704024  | 44764028  | C               | T      | 211 | 8  | 0.04 | 103 | 76  | 0.42 | 128 | 0   | 0.00 | 2 | 1.35 | 2   | tier3 | tumor-specific   | 0 |
| 9 | 72996586  | 73806766  | C               | T      | 426 | 24 | 0.05 | 306 | 236 | 0.44 | 242 | 153 | 0.39 | 2 | 2    | 2   | tier3 | shared           | 1 |
| 9 | 82162464  | 82972644  | C               | T      | 577 | 42 | 0.07 | 358 | 324 | 0.48 | 330 | 210 | 0.39 | 2 | 2    | 2   | tier3 | shared           | 0 |
| 9 | 98933679  | 99893858  | C               | T      | 135 | 11 | 0.08 | 86  | 45  | 0.34 | 78  | 48  | 0.38 | 2 | 2    | 2   | tier3 | shared           | 0 |
| X | 110529928 | 110643272 | G               | T      | 666 | 42 | 0.06 | 523 | 345 | 0.40 | 382 | 241 | 0.39 | 2 | 2    | 2   | tier3 | shared           | 0 |
| X | 125965730 | 126138049 | C               | T      | 657 | 50 | 0.07 | 415 | 320 | 0.44 | 399 | 253 | 0.39 | 2 | 2    | 2   | tier3 | shared           | 1 |
| X | 132149351 | 132321685 | G               | A      | 702 | 44 | 0.06 | 489 | 375 | 0.43 | 422 | 241 | 0.36 | 2 | 2    | 2   | tier3 | shared           | 0 |
| X | 138598168 | 138770502 | C               | A      | 573 | 40 | 0.07 | 371 | 304 | 0.45 | 313 | 204 | 0.39 | 2 | 2    | 2   | tier2 | shared           | 0 |
| X | 139300091 | 139472425 | C               | G      | 632 | 48 | 0.07 | 382 | 351 | 0.48 | 366 | 212 | 0.37 | 2 | 2    | 2   | tier3 | shared           | 0 |
| X | 14703698  | 14793777  | C               | A      | 547 | 42 | 0.07 | 405 | 344 | 0.46 | 363 | 192 | 0.35 | 2 | 2    | 2   | tier3 | shared           | 0 |
| X | 149619579 | 149868921 | T               | C      | 706 | 56 | 0.07 | 462 | 374 | 0.45 | 430 | 257 | 0.37 | 2 | 2    | 2   | tier3 | shared           | 2 |
| X | 20146561  | 20236640  | A               | G      | 386 | 37 | 0.09 | 321 | 245 | 0.43 | 229 | 128 | 0.36 | 2 | 2    | 2   | tier3 | shared           | 0 |
| X | 21650360  | 21740439  | C               | T      | 573 | 57 | 0.09 | 391 | 274 | 0.41 | 343 | 176 | 0.34 | 2 | 2    | 2   | tier3 | shared           | 0 |
| X | 26806418  | 26896497  | G               | A      | 529 | 38 | 0.07 | 376 | 331 | 0.47 | 317 | 186 | 0.37 | 2 | 2    | 2   | tier3 | shared           | 1 |
| X | 27321309  | 27411388  | AAAACATATTCCAAA | -      | 503 | 53 | 0.10 | 433 | 336 | 0.44 | 339 | 188 | 0.36 | 2 | 2    | 2   | tier3 | shared           | 0 |
| X | 27677257  | 27767336  | C               | T      | 530 | 17 | 0.03 | 522 | 115 | 0.18 | 440 | 72  | 0.14 | 2 | 2    | 2   | tier3 | shared           | 0 |
| X | 37616787  | 37731843  | T               | C      | 604 | 34 | 0.05 | 406 | 322 | 0.44 | 341 | 209 | 0.38 | 2 | 2    | 2   | tier3 | shared           | 0 |
| X | 39818802  | 39933858  | C               | -      | 539 | 52 | 0.09 | 407 | 412 | 0.50 | 389 | 214 | 0.35 | 2 | 2    | 2   | tier1 | shared           | 0 |
| X | 41959339  | 42074395  | C               | T      | 652 | 36 | 0.05 | 448 | 352 | 0.44 | 403 | 208 | 0.34 | 2 | 2    | 2   | tier3 | shared           | 0 |
| X | 7138841   | 7128841   | G               | A      | 57  | 9  | 0.14 | 3   | 37  | 0.93 | 1   | 24  | 0.96 | 2 | 2    | 2   | tier3 | shared           | 0 |
| X | 7449501   | 7439501   | C               | A      | 715 | 1  | 0.00 | 877 | 0   | 0.00 | 577 | 91  | 0.14 | 2 | 2    | 2   | tier2 | relapse-specific | 1 |
| X | 89105562  | 89218906  | G               | T      | 485 | 27 | 0.05 | 352 | 258 | 0.42 | 273 | 153 | 0.36 | 2 | 0.9  | 1.1 | tier3 | shared           | 0 |
| X | 89181903  | 89295247  | C               | T      | 740 | 0  | 0.00 | 982 | 0   | 0.00 | 699 | 62  | 0.08 | 2 | 2    | 2   | tier1 | relapse-specific | 1 |

**Supplementary Table 6b.** Somatic point mutations and indels from UPN 426980 tumor-relapse pair used for mutation spectrum and clonality analyses. Mutations identified in the relapse sample with <2% allele frequencies in the primary tumor were classified as relapse-specific.

| Chr | Start (NCBI_36) | Start (GRCh37) | Ref | Var | NormalRefReads | NormalVarReads | NormalVarFreq | TumorRefReads | TumorVarReads | TumorVarFreq | RelapseRefReads | RelapseVarReads | RelapseVarFreq | NormalCN | TumorCN | RelapseCN | Tier  | Classification   | # of samples recurrent (out of 200) |
|-----|-----------------|----------------|-----|-----|----------------|----------------|---------------|---------------|---------------|--------------|-----------------|-----------------|----------------|----------|---------|-----------|-------|------------------|-------------------------------------|
| 1   | 101393361       | 101620773      | C   | T   | 688            | 7              | 0.01          | 414           | 326           | 0.44         | 735             | 515             | 0.41           | 2        | 2       | 2         | tier2 | shared           | 0                                   |
| 1   | 105143735       | 105342212      | C   | G   | 905            | 14             | 0.02          | 532           | 443           | 0.45         | 973             | 692             | 0.42           | 2        | 2       | 2         | tier3 | shared           | 1                                   |
| 1   | 1105467         | 1115604        | C   | T   | 315            | 38             | 0.11          | 162           | 120           | 0.43         | 36              | 40              | 0.53           | 2        | 1.25    | 1.38      | tier1 | shared           | 0                                   |
| 1   | 118156398       | 118354875      | C   | T   | 444            | 7              | 0.02          | 310           | 260           | 0.46         | 421             | 369             | 0.47           | 2        | 2       | 2         | tier2 | shared           | 0                                   |
| 1   | 119892131       | 120090608      | G   | T   | 451            | 0              | 0.00          | 551           | 4             | 0.01         | 716             | 226             | 0.24           | 2        | 2       | 2         | tier3 | relapse-specific | 0                                   |
| 1   | 145465273       | 146998649      | A   | C   | 379            | 4              | 0.01          | 318           | 249           | 0.44         | 636             | 479             | 0.43           | 2        | 2       | 2         | tier3 | shared           | 0                                   |
| 1   | 145742928       | 147276304      | G   | A   | 595            | 7              | 0.01          | 414           | 338           | 0.45         | 780             | 585             | 0.43           | 2        | 2       | 2         | tier3 | shared           | 0                                   |
| 1   | 151632796       | 153366172      | G   | A   | 520            | 7              | 0.01          | 394           | 291           | 0.42         | 880             | 112             | 0.11           | 2        | 2       | 2         | tier3 | shared           | 0                                   |
| 1   | 154189110       | 155922486      | G   | T   | 455            | 10             | 0.02          | 301           | 189           | 0.39         | 326             | 191             | 0.37           | 2        | 2       | 2         | tier1 | shared           | 1                                   |
| 1   | 162390535       | 164123911      | A   | G   | 655            | 9              | 0.01          | 424           | 355           | 0.46         | 805             | 600             | 0.43           | 2        | 2       | 2         | tier3 | shared           | 1                                   |
| 1   | 164527242       | 166260618      | C   | T   | 594            | 0              | 0.00          | 764           | 7             | 0.01         | 955             | 410             | 0.30           | 2        | 2       | 2         | tier3 | relapse-specific | 0                                   |
| 1   | 168963347       | 170696723      | G   | A   | 570            | 7              | 0.01          | 352           | 283           | 0.45         | 461             | 286             | 0.38           | 2        | 2       | 2         | tier3 | shared           | 0                                   |
| 1   | 175508370       | 177241747      | C   | T   | 622            | 4              | 0.01          | 431           | 320           | 0.43         | 651             | 434             | 0.40           | 2        | 2       | 2         | tier3 | shared           | 0                                   |
| 1   | 181141559       | 182874936      | C   | T   | 547            | 9              | 0.02          | 366           | 237           | 0.39         | 511             | 360             | 0.41           | 2        | 2       | 2         | tier3 | shared           | 0                                   |
| 1   | 182353408       | 184086785      | G   | C   | 646            | 6              | 0.01          | 365           | 314           | 0.46         | 640             | 462             | 0.42           | 2        | 2       | 2         | tier3 | shared           | 0                                   |
| 1   | 184219659       | 185953036      | A   | G   | 657            | 16             | 0.02          | 437           | 359           | 0.45         | 381             | 304             | 0.44           | 2        | 2       | 2         | tier3 | shared           | 4                                   |
| 1   | 185120932       | 186854309      | G   | A   | 731            | 11             | 0.01          | 465           | 399           | 0.46         | 1703            | 1189            | 0.41           | 2        | 2       | 2         | tier2 | shared           | 0                                   |
| 1   | 18730737        | 18858150       | C   | T   | 413            | 1              | 0.00          | 578           | 3             | 0.01         | 675             | 326             | 0.33           | 2        | 2       | 2         | tier3 | relapse-specific | 1                                   |
| 1   | 187595261       | 189328638      | T   | C   | 523            | 8              | 0.02          | 318           | 282           | 0.47         | 445             | 327             | 0.42           | 2        | 2       | 2         | tier3 | shared           | 1                                   |
| 1   | 187909251       | 189642628      | G   | A   | 622            | 8              | 0.01          | 378           | 313           | 0.45         | 341             | 262             | 0.43           | 2        | 2       | 2         | tier3 | shared           | 1                                   |
| 1   | 199529289       | 201262666      | G   | A   | 445            | 7              | 0.02          | 310           | 249           | 0.45         | 236             | 168             | 0.42           | 2        | 2       | 2         | tier3 | shared           | 0                                   |
| 1   | 201235198       | 202968575      | G   | A   | 566            | 12             | 0.02          | 366           | 298           | 0.45         | 255             | 160             | 0.39           | 2        | 2       | 2         | tier2 | shared           | 0                                   |
| 1   | 204839488       | 206772865      | T   | C   | 399            | 7              | 0.02          | 257           | 259           | 0.50         | 424             | 360             | 0.46           | 2        | 2       | 2         | tier1 | shared           | 1                                   |
| 1   | 207753849       | 209687226      | G   | T   | 480            | 8              | 0.02          | 303           | 255           | 0.46         | 724             | 538             | 0.43           | 2        | 2       | 2         | tier2 | shared           | 1                                   |
| 1   | 211654724       | 213588101      | T   | C   | 185            | 5              | 0.03          | 119           | 77            | 0.39         | 246             | 124             | 0.34           | 2        | 2       | 2         | tier3 | shared           | 0                                   |
| 1   | 212037538       | 213970915      | C   | T   | 757            | 0              | 0.00          | 861           | 7             | 0.01         | 801             | 401             | 0.33           | 2        | 2       | 2         | tier2 | relapse-specific | 1                                   |
| 1   | 21472135        | 21599548       | C   | T   | 521            | 4              | 0.01          | 319           | 296           | 0.48         | 170             | 114             | 0.40           | 2        | 2       | 2         | tier2 | shared           | 0                                   |
| 1   | 214814537       | 216747914      | G   | A   | 642            | 8              | 0.01          | 434           | 364           | 0.46         | 432             | 271             | 0.39           | 2        | 2       | 2         | tier3 | shared           | 0                                   |
| 1   | 214823009       | 216756386      | -   | A   | 415            | 14             | 0.03          | 369           | 217           | 0.37         | 411             | 234             | 0.36           | 2        | 2       | 2         | tier3 | shared           | 0                                   |

|   |           |           |   |   |      |    |      |      |     |      |      |     |      |   |   |   |       |                  |   |
|---|-----------|-----------|---|---|------|----|------|------|-----|------|------|-----|------|---|---|---|-------|------------------|---|
| 1 | 215053873 | 216987250 | G | A | 886  | 13 | 0.01 | 594  | 357 | 0.38 | 1184 | 5   | 0.00 | 2 | 2 | 2 | tier2 | tumor-specific   | 0 |
| 1 | 216303921 | 218237298 | T | C | 745  | 4  | 0.01 | 592  | 399 | 0.40 | 976  | 647 | 0.40 | 2 | 2 | 2 | tier2 | shared           | 1 |
| 1 | 220229180 | 222162557 | A | C | 846  | 22 | 0.03 | 582  | 422 | 0.42 | 1236 | 813 | 0.40 | 2 | 2 | 2 | tier3 | shared           | 0 |
| 1 | 224891642 | 226825019 | G | A | 440  | 9  | 0.02 | 262  | 256 | 0.49 | 210  | 157 | 0.43 | 2 | 2 | 2 | tier2 | shared           | 0 |
| 1 | 22831628  | 22959041  | C | T | 726  | 2  | 0.00 | 770  | 12  | 0.02 | 430  | 187 | 0.30 | 2 | 2 | 2 | tier3 | relapse-specific | 0 |
| 1 | 231376911 | 233310288 | T | A | 403  | 4  | 0.01 | 284  | 245 | 0.46 | 338  | 243 | 0.42 | 2 | 2 | 2 | tier3 | shared           | 0 |
| 1 | 231645734 | 233579111 | G | A | 826  | 13 | 0.02 | 559  | 421 | 0.43 | 638  | 465 | 0.42 | 2 | 2 | 2 | tier3 | shared           | 1 |
| 1 | 234870833 | 236804210 | A | G | 1247 | 21 | 0.02 | 941  | 443 | 0.32 | 1729 | 777 | 0.31 | 2 | 2 | 2 | tier3 | shared           | 0 |
| 1 | 235735186 | 237668563 | G | A | 951  | 1  | 0.00 | 1068 | 7   | 0.01 | 1262 | 474 | 0.27 | 2 | 2 | 2 | tier3 | relapse-specific | 0 |
| 1 | 236046085 | 237979462 | C | T | 753  | 12 | 0.02 | 422  | 361 | 0.46 | 539  | 422 | 0.44 | 2 | 2 | 2 | tier2 | shared           | 0 |
| 1 | 238987024 | 240920401 | G | A | 641  | 13 | 0.02 | 421  | 314 | 0.43 | 392  | 313 | 0.44 | 2 | 2 | 2 | tier3 | shared           | 0 |
| 1 | 240678783 | 242612160 | G | A | 809  | 12 | 0.01 | 476  | 366 | 0.43 | 1466 | 180 | 0.11 | 2 | 2 | 2 | tier3 | shared           | 1 |
| 1 | 24106057  | 24233470  | C | T | 920  | 10 | 0.01 | 588  | 470 | 0.44 | 494  | 343 | 0.41 | 2 | 2 | 2 | tier2 | shared           | 0 |
| 1 | 246896247 | 248829624 | G | A | 403  | 6  | 0.01 | 266  | 172 | 0.39 | 436  | 258 | 0.37 | 2 | 2 | 2 | tier3 | shared           | 0 |
| 1 | 27746319  | 27873732  | C | T | 602  | 7  | 0.01 | 420  | 312 | 0.43 | 339  | 263 | 0.44 | 2 | 2 | 2 | tier3 | shared           | 0 |
| 1 | 29998919  | 30226332  | G | T | 356  | 6  | 0.02 | 221  | 228 | 0.51 | 229  | 147 | 0.39 | 2 | 2 | 2 | tier3 | shared           | 1 |
| 1 | 32266340  | 32493753  | G | T | 485  | 4  | 0.01 | 343  | 244 | 0.42 | 261  | 0   | 0.00 | 2 | 2 | 2 | tier3 | tumor-specific   | 0 |
| 1 | 34313330  | 34540743  | G | A | 610  | 15 | 0.02 | 370  | 338 | 0.48 | 532  | 453 | 0.46 | 2 | 2 | 2 | tier3 | shared           | 0 |
| 1 | 3628599   | 3638739   | C | T | 473  | 7  | 0.01 | 272  | 207 | 0.43 | 11   | 13  | 0.54 | 2 | 2 | 2 | tier1 | shared           | 0 |
| 1 | 38002399  | 38229812  | C | T | 349  | 3  | 0.01 | 203  | 175 | 0.46 | 260  | 161 | 0.38 | 2 | 2 | 2 | tier2 | shared           | 3 |
| 1 | 41706896  | 41934309  | T | C | 216  | 1  | 0.00 | 272  | 189 | 0.41 | 482  | 69  | 0.13 | 2 | 2 | 2 | tier3 | shared           | 0 |
| 1 | 44238718  | 44466131  | C | T | 427  | 5  | 0.01 | 257  | 223 | 0.46 | 396  | 290 | 0.42 | 2 | 2 | 2 | tier3 | shared           | 3 |
| 1 | 46486887  | 46714300  | G | A | 397  | 4  | 0.01 | 309  | 221 | 0.42 | 103  | 88  | 0.46 | 2 | 2 | 2 | tier3 | shared           | 0 |
| 1 | 49353893  | 49581306  | G | A | 496  | 5  | 0.01 | 433  | 309 | 0.42 | 653  | 492 | 0.43 | 2 | 2 | 2 | tier3 | shared           | 0 |
| 1 | 57959013  | 58186425  | G | A | 522  | 6  | 0.01 | 378  | 299 | 0.44 | 716  | 566 | 0.44 | 2 | 2 | 2 | tier3 | shared           | 0 |
| 1 | 58062591  | 58290003  | G | A | 585  | 15 | 0.03 | 387  | 303 | 0.44 | 815  | 101 | 0.11 | 2 | 2 | 2 | tier3 | shared           | 0 |
| 1 | 62517067  | 62744479  | T | C | 781  | 7  | 0.01 | 470  | 391 | 0.45 | 826  | 609 | 0.42 | 2 | 2 | 2 | tier3 | shared           | 0 |
| 1 | 64758033  | 64985445  | A | G | 505  | 11 | 0.02 | 346  | 289 | 0.46 | 467  | 313 | 0.40 | 2 | 2 | 2 | tier3 | shared           | 1 |
| 1 | 66455603  | 66683015  | C | T | 825  | 12 | 0.01 | 510  | 449 | 0.47 | 1329 | 849 | 0.39 | 2 | 2 | 2 | tier3 | shared           | 0 |
| 1 | 68003365  | 68230777  | T | G | 545  | 8  | 0.01 | 332  | 279 | 0.46 | 340  | 274 | 0.45 | 2 | 2 | 2 | tier3 | shared           | 0 |
| 1 | 70011661  | 70239073  | G | C | 458  | 3  | 0.01 | 416  | 313 | 0.43 | 1315 | 981 | 0.43 | 2 | 2 | 2 | tier3 | shared           | 2 |
| 1 | 70313793  | 70541205  | C | T | 570  | 7  | 0.01 | 498  | 358 | 0.42 | 1214 | 24  | 0.02 | 2 | 2 | 2 | tier3 | tumor-specific   | 2 |
| 1 | 72971329  | 73198741  | T | G | 245  | 4  | 0.02 | 174  | 176 | 0.50 | 143  | 134 | 0.48 | 2 | 2 | 2 | tier3 | shared           | 0 |
| 1 | 76285296  | 76512708  | C | T | 411  | 2  | 0.00 | 338  | 294 | 0.47 | 708  | 528 | 0.43 | 2 | 2 | 2 | tier3 | shared           | 0 |
| 1 | 78098735  | 78326147  | G | A | 659  | 13 | 0.02 | 378  | 350 | 0.48 | 438  | 336 | 0.43 | 2 | 2 | 2 | tier3 | shared           | 0 |
| 1 | 80262063  | 80489475  | C | A | 445  | 7  | 0.02 | 338  | 288 | 0.46 | 567  | 1   | 0.00 | 2 | 2 | 2 | tier3 | tumor-specific   | 1 |
| 1 | 82981466  | 83208878  | T | G | 330  | 2  | 0.01 | 292  | 208 | 0.42 | 244  | 185 | 0.43 | 2 | 2 | 2 | tier3 | shared           | 1 |
| 1 | 8610857   | 8688270   | C | A | 825  | 9  | 0.01 | 461  | 378 | 0.45 | 751  | 591 | 0.44 | 2 | 2 | 2 | tier3 | shared           | 1 |
| 1 | 87284832  | 87512244  | C | A | 603  | 12 | 0.02 | 334  | 288 | 0.46 | 506  | 348 | 0.41 | 2 | 2 | 2 | tier2 | shared           | 0 |
| 1 | 89433568  | 89660980  | C | A | 572  | 1  | 0.00 | 650  | 9   | 0.01 | 461  | 218 | 0.32 | 2 | 2 | 2 | tier1 | relapse-specific | 2 |

|    |           |           |   |   |     |    |      |     |     |      |      |     |      |   |      |   |       |                  |   |
|----|-----------|-----------|---|---|-----|----|------|-----|-----|------|------|-----|------|---|------|---|-------|------------------|---|
| 1  | 91498853  | 91726265  | C | T | 480 | 7  | 0.01 | 282 | 198 | 0.41 | 295  | 179 | 0.38 | 2 | 2    | 2 | tier2 | shared           | 0 |
| 1  | 96777968  | 97005380  | G | A | 826 | 11 | 0.01 | 510 | 444 | 0.47 | 1198 | 854 | 0.42 | 2 | 2    | 2 | tier3 | shared           | 0 |
| 1  | 99828834  | 100056246 | G | A | 910 | 13 | 0.01 | 475 | 422 | 0.47 | 1526 | 191 | 0.11 | 2 | 2    | 2 | tier3 | shared           | 1 |
| 10 | 100679446 | 100689456 | A | C | 729 | 0  | 0.00 | 761 | 9   | 0.01 | 635  | 274 | 0.30 | 2 | 2    | 2 | tier2 | relapse-specific | 0 |
| 10 | 106329053 | 106339063 | G | A | 530 | 0  | 0.00 | 692 | 11  | 0.02 | 487  | 199 | 0.29 | 2 | 2    | 2 | tier2 | relapse-specific | 1 |
| 10 | 106427870 | 106437880 | C | T | 733 | 11 | 0.01 | 436 | 351 | 0.45 | 721  | 513 | 0.42 | 2 | 2    | 2 | tier3 | shared           | 1 |
| 10 | 106961580 | 106971590 | C | A | 585 | 6  | 0.01 | 397 | 328 | 0.45 | 389  | 262 | 0.40 | 2 | 2    | 2 | tier3 | shared           | 1 |
| 10 | 107464815 | 107474825 | A | G | 381 | 5  | 0.01 | 250 | 199 | 0.44 | 1067 | 735 | 0.41 | 2 | 2    | 2 | tier3 | shared           | 0 |
| 10 | 112425052 | 112435062 | G | A | 538 | 8  | 0.01 | 397 | 329 | 0.45 | 492  | 392 | 0.44 | 2 | 2    | 2 | tier3 | shared           | 0 |
| 10 | 113939543 | 113949553 | C | - | 695 | 4  | 0.01 | 505 | 350 | 0.41 | 611  | 390 | 0.39 | 2 | 2    | 2 | tier3 | shared           | 0 |
| 10 | 119569098 | 119579108 | C | A | 490 | 6  | 0.01 | 333 | 276 | 0.45 | 479  | 270 | 0.36 | 2 | 2    | 2 | tier3 | shared           | 1 |
| 10 | 120068920 | 120078930 | T | C | 570 | 5  | 0.01 | 369 | 271 | 0.42 | 356  | 306 | 0.46 | 2 | 2    | 2 | tier3 | shared           | 0 |
| 10 | 122869500 | 122879510 | G | A | 845 | 8  | 0.01 | 541 | 412 | 0.43 | 1579 | 4   | 0.00 | 2 | 2    | 2 | tier3 | tumor-specific   | 0 |
| 10 | 129477518 | 129587528 | A | T | 546 | 0  | 0.00 | 661 | 15  | 0.02 | 152  | 60  | 0.28 | 2 | 2    | 2 | tier2 | shared           | 0 |
| 10 | 131267265 | 131377275 | G | A | 580 | 12 | 0.02 | 361 | 296 | 0.45 | 238  | 170 | 0.42 | 2 | 2    | 2 | tier3 | shared           | 0 |
| 10 | 131606443 | 131716453 | G | A | 522 | 11 | 0.02 | 348 | 302 | 0.46 | 196  | 133 | 0.40 | 2 | 2    | 2 | tier3 | shared           | 0 |
| 10 | 133030953 | 133140963 | G | A | 660 | 0  | 0.00 | 621 | 7   | 0.01 | 361  | 294 | 0.45 | 2 | 2    | 2 | tier3 | relapse-specific | 1 |
| 10 | 133123730 | 133233740 | G | A | 548 | 5  | 0.01 | 295 | 244 | 0.45 | 370  | 248 | 0.40 | 2 | 2    | 2 | tier3 | shared           | 1 |
| 10 | 134689001 | 134839011 | C | T | 595 | 7  | 0.01 | 353 | 248 | 0.41 | 102  | 0   | 0.00 | 2 | 1.36 | 2 | tier3 | tumor-specific   | 1 |
| 10 | 14197973  | 14157967  | C | T | 780 | 11 | 0.01 | 485 | 397 | 0.45 | 904  | 608 | 0.40 | 2 | 2    | 2 | tier3 | shared           | 0 |
| 10 | 16571520  | 16531514  | T | - | 498 | 7  | 0.01 | 398 | 281 | 0.41 | 644  | 437 | 0.40 | 2 | 2    | 2 | tier3 | shared           | 0 |
| 10 | 21774153  | 21734147  | C | G | 602 | 0  | 0.00 | 788 | 7   | 0.01 | 523  | 203 | 0.28 | 2 | 2    | 2 | tier2 | relapse-specific | 0 |
| 10 | 24053538  | 24013532  | T | A | 461 | 0  | 0.00 | 588 | 5   | 0.01 | 632  | 274 | 0.30 | 2 | 2    | 2 | tier3 | relapse-specific | 2 |
| 10 | 35053174  | 35013168  | A | G | 579 | 11 | 0.02 | 318 | 337 | 0.51 | 583  | 508 | 0.47 | 2 | 2    | 2 | tier2 | shared           | 1 |
| 10 | 36520796  | 36480790  | C | A | 453 | 5  | 0.01 | 325 | 290 | 0.47 | 736  | 536 | 0.42 | 2 | 2    | 2 | tier3 | shared           | 1 |
| 10 | 37158144  | 37118138  | C | T | 325 | 0  | 0.00 | 418 | 4   | 0.01 | 287  | 93  | 0.24 | 2 | 2    | 2 | tier3 | relapse-specific | 1 |
| 10 | 37641146  | 37601140  | C | T | 583 | 4  | 0.01 | 445 | 417 | 0.48 | 1363 | 188 | 0.12 | 2 | 2    | 2 | tier2 | shared           | 0 |
| 10 | 49813619  | 50143613  | C | T | 644 | 6  | 0.01 | 450 | 324 | 0.42 | 533  | 342 | 0.39 | 2 | 2    | 2 | tier3 | shared           | 0 |
| 10 | 52992328  | 53322322  | C | A | 742 | 2  | 0.00 | 880 | 3   | 0.00 | 868  | 384 | 0.31 | 2 | 2    | 2 | tier2 | relapse-specific | 0 |
| 10 | 5825694   | 5785688   | A | C | 606 | 15 | 0.02 | 416 | 305 | 0.42 | 313  | 249 | 0.44 | 2 | 2    | 2 | tier3 | shared           | 1 |
| 10 | 58352080  | 58682074  | C | T | 594 | 7  | 0.01 | 449 | 304 | 0.40 | 789  | 106 | 0.12 | 2 | 2    | 2 | tier3 | shared           | 1 |
| 10 | 58951851  | 59281845  | C | T | 702 | 8  | 0.01 | 410 | 312 | 0.43 | 342  | 253 | 0.43 | 2 | 2    | 2 | tier3 | shared           | 0 |
| 10 | 6072229   | 6032223   | T | C | 580 | 11 | 0.02 | 399 | 312 | 0.44 | 241  | 196 | 0.45 | 2 | 2    | 2 | tier3 | shared           | 0 |
| 10 | 6189881   | 6149875   | G | A | 493 | 10 | 0.02 | 282 | 203 | 0.42 | 334  | 251 | 0.43 | 2 | 2    | 2 | tier3 | shared           | 0 |
| 10 | 63067047  | 63397041  | A | G | 373 | 3  | 0.01 | 224 | 186 | 0.45 | 254  | 191 | 0.43 | 2 | 2    | 2 | tier3 | shared           | 0 |
| 10 | 65525766  | 65855760  | C | T | 643 | 6  | 0.01 | 365 | 282 | 0.44 | 431  | 267 | 0.38 | 2 | 2    | 2 | tier3 | shared           | 1 |
| 10 | 65586533  | 65916527  | T | - | 510 | 6  | 0.01 | 322 | 243 | 0.43 | 551  | 333 | 0.38 | 2 | 2    | 2 | tier3 | shared           | 0 |
| 10 | 79512024  | 79842018  | G | A | 816 | 14 | 0.02 | 454 | 361 | 0.44 | 984  | 681 | 0.41 | 2 | 2    | 2 | tier2 | shared           | 0 |
| 10 | 79693537  | 80023531  | C | T | 606 | 10 | 0.02 | 402 | 369 | 0.48 | 576  | 391 | 0.40 | 2 | 2    | 2 | tier3 | shared           | 1 |
| 10 | 7974199   | 7934193   | G | A | 557 | 9  | 0.02 | 315 | 257 | 0.45 | 458  | 268 | 0.37 | 2 | 2    | 2 | tier3 | shared           | 0 |

|    |           |           |      |   |     |    |      |     |     |      |      |      |      |   |   |   |       |                  |   |
|----|-----------|-----------|------|---|-----|----|------|-----|-----|------|------|------|------|---|---|---|-------|------------------|---|
| 10 | 81829774  | 81839794  | C    | T | 737 | 13 | 0.02 | 445 | 383 | 0.46 | 435  | 328  | 0.43 | 2 | 2 | 2 | tier2 | shared           | 0 |
| 10 | 84233189  | 84243209  | T    | C | 742 | 6  | 0.01 | 500 | 349 | 0.41 | 1467 | 939  | 0.39 | 2 | 2 | 2 | tier3 | shared           | 1 |
| 10 | 84773201  | 84783221  | C    | G | 631 | 3  | 0.00 | 686 | 151 | 0.18 | 1443 | 1    | 0.00 | 2 | 2 | 2 | tier3 | tumor-specific   | 1 |
| 10 | 87275037  | 87285057  | A    | - | 734 | 13 | 0.02 | 480 | 342 | 0.42 | 632  | 437  | 0.41 | 2 | 2 | 2 | tier2 | shared           | 0 |
| 10 | 89666645  | 89676665  | T    | C | 620 | 9  | 0.01 | 438 | 335 | 0.43 | 1980 | 6    | 0.00 | 2 | 2 | 2 | tier3 | tumor-specific   | 0 |
| 10 | 90135755  | 90145775  | C    | G | 618 | 13 | 0.02 | 412 | 322 | 0.44 | 742  | 99   | 0.12 | 2 | 2 | 2 | tier3 | shared           | 0 |
| 10 | 91687622  | 91697642  | C    | T | 604 | 5  | 0.01 | 354 | 306 | 0.46 | 788  | 476  | 0.38 | 2 | 2 | 2 | tier3 | shared           | 0 |
| 10 | 97380898  | 97390908  | T    | C | 775 | 14 | 0.02 | 484 | 426 | 0.47 | 474  | 342  | 0.42 | 2 | 2 | 2 | tier3 | shared           | 0 |
| 11 | 101052879 | 101547669 | A    | G | 648 | 9  | 0.01 | 358 | 322 | 0.47 | 564  | 411  | 0.42 | 2 | 2 | 2 | tier3 | shared           | 1 |
| 11 | 105019563 | 105514353 | T    | C | 682 | 10 | 0.01 | 481 | 400 | 0.45 | 527  | 391  | 0.43 | 2 | 2 | 2 | tier3 | shared           | 0 |
| 11 | 107076075 | 107570865 | C    | G | 578 | 10 | 0.02 | 328 | 304 | 0.48 | 392  | 298  | 0.43 | 2 | 2 | 2 | tier3 | shared           | 0 |
| 11 | 111880324 | 112375114 | C    | T | 385 | 4  | 0.01 | 251 | 246 | 0.49 | 401  | 316  | 0.44 | 2 | 2 | 2 | tier3 | shared           | 0 |
| 11 | 11195136  | 11238560  | G    | A | 503 | 9  | 0.02 | 350 | 248 | 0.41 | 880  | 633  | 0.42 | 2 | 2 | 2 | tier2 | shared           | 1 |
| 11 | 112163120 | 112657910 | C    | T | 694 | 6  | 0.01 | 484 | 411 | 0.46 | 584  | 486  | 0.45 | 2 | 2 | 2 | tier2 | shared           | 1 |
| 11 | 112700960 | 113195750 | A    | T | 300 | 4  | 0.01 | 247 | 211 | 0.46 | 604  | 387  | 0.39 | 2 | 2 | 2 | tier3 | shared           | 0 |
| 11 | 112788535 | 113283325 | G    | A | 661 | 8  | 0.01 | 483 | 353 | 0.42 | 838  | 121  | 0.13 | 2 | 2 | 2 | tier1 | shared           | 3 |
| 11 | 113654890 | 114149680 | G    | A | 407 | 7  | 0.02 | 305 | 266 | 0.47 | 579  | 402  | 0.41 | 2 | 2 | 2 | tier3 | shared           | 0 |
| 11 | 114673288 | 115168078 | G    | A | 655 | 13 | 0.02 | 450 | 358 | 0.44 | 677  | 448  | 0.40 | 2 | 2 | 2 | tier2 | shared           | 0 |
| 11 | 115268684 | 115763474 | C    | T | 794 | 10 | 0.01 | 486 | 385 | 0.44 | 1592 | 1164 | 0.42 | 2 | 2 | 2 | tier2 | shared           | 0 |
| 11 | 126198932 | 126693722 | G    | T | 440 | 2  | 0.00 | 535 | 95  | 0.15 | 1462 | 0    | 0.00 | 2 | 2 | 2 | tier3 | tumor-specific   | 0 |
| 11 | 131387313 | 131882103 | C    | T | 546 | 3  | 0.01 | 370 | 298 | 0.45 | 874  | 553  | 0.39 | 2 | 2 | 2 | tier2 | shared           | 0 |
| 11 | 132379291 | 132874081 | A    | G | 561 | 5  | 0.01 | 388 | 346 | 0.47 | 674  | 418  | 0.38 | 2 | 2 | 2 | tier3 | shared           | 0 |
| 11 | 132852036 | 133346826 | C    | T | 723 | 9  | 0.01 | 383 | 328 | 0.46 | 828  | 584  | 0.41 | 2 | 2 | 2 | tier3 | shared           | 0 |
| 11 | 132950129 | 133444919 | T    | A | 589 | 12 | 0.02 | 417 | 376 | 0.47 | 294  | 208  | 0.41 | 2 | 2 | 2 | tier3 | shared           | 0 |
| 11 | 133896437 | 134391227 | C    | A | 684 | 8  | 0.01 | 367 | 335 | 0.48 | 348  | 288  | 0.45 | 2 | 2 | 2 | tier3 | shared           | 1 |
| 11 | 134163837 | 134658627 | G    | A | 692 | 12 | 0.02 | 475 | 347 | 0.42 | 829  | 634  | 0.43 | 2 | 2 | 2 | tier3 | shared           | 1 |
| 11 | 23229336  | 23272760  | G    | A | 420 | 8  | 0.02 | 253 | 183 | 0.42 | 236  | 147  | 0.38 | 2 | 2 | 2 | tier3 | shared           | 1 |
| 11 | 25378975  | 25422399  | G    | A | 654 | 6  | 0.01 | 426 | 302 | 0.41 | 979  | 139  | 0.12 | 2 | 2 | 2 | tier2 | shared           | 1 |
| 11 | 25798017  | 25841441  | C    | A | 343 | 3  | 0.01 | 218 | 126 | 0.37 | 230  | 125  | 0.35 | 2 | 2 | 2 | tier3 | shared           | 1 |
| 11 | 26915201  | 26958625  | G    | A | 780 | 0  | 0.00 | 766 | 15  | 0.02 | 1046 | 478  | 0.31 | 2 | 2 | 2 | tier3 | relapse-specific | 1 |
| 11 | 27181250  | 27224674  | T    | A | 602 | 0  | 0.00 | 678 | 4   | 0.01 | 724  | 190  | 0.21 | 2 | 2 | 2 | tier3 | relapse-specific | 1 |
| 11 | 29982645  | 30026069  | G    | A | 581 | 0  | 0.00 | 594 | 7   | 0.01 | 557  | 236  | 0.30 | 2 | 2 | 2 | tier3 | relapse-specific | 1 |
| 11 | 35240206  | 35283630  | A    | G | 706 | 15 | 0.02 | 376 | 328 | 0.47 | 568  | 429  | 0.43 | 2 | 2 | 2 | tier2 | shared           | 1 |
| 11 | 36946532  | 36989956  | G    | A | 640 | 1  | 0.00 | 428 | 358 | 0.46 | 1005 | 667  | 0.40 | 2 | 2 | 2 | tier3 | shared           | 1 |
| 11 | 39838693  | 39882117  | TATT | - | 297 | 7  | 0.02 | 174 | 211 | 0.55 | 243  | 249  | 0.51 | 2 | 2 | 2 | tier3 | shared           | 1 |
| 11 | 40908778  | 40952202  | C    | A | 792 | 15 | 0.02 | 559 | 452 | 0.45 | 1083 | 160  | 0.13 | 2 | 2 | 2 | tier3 | shared           | 1 |
| 11 | 41590836  | 41634260  | C    | T | 553 | 4  | 0.01 | 360 | 297 | 0.45 | 769  | 616  | 0.44 | 2 | 2 | 2 | tier3 | shared           | 1 |
| 11 | 42335523  | 42378947  | G    | A | 610 | 9  | 0.01 | 443 | 364 | 0.45 | 639  | 451  | 0.41 | 2 | 2 | 2 | tier3 | shared           | 1 |
| 11 | 42653124  | 42696548  | C    | T | 704 | 6  | 0.01 | 459 | 279 | 0.38 | 1379 | 136  | 0.09 | 2 | 2 | 2 | tier3 | shared           | 1 |
| 11 | 44434800  | 44478224  | A    | T | 466 | 8  | 0.02 | 290 | 236 | 0.45 | 363  | 246  | 0.40 | 2 | 2 | 2 | tier2 | shared           | 1 |

|    |           |           |   |   |     |    |      |     |     |      |      |     |      |   |   |   |       |                  |   |
|----|-----------|-----------|---|---|-----|----|------|-----|-----|------|------|-----|------|---|---|---|-------|------------------|---|
| 11 | 45926741  | 45970165  | C | T | 514 | 7  | 0.01 | 392 | 279 | 0.42 | 559  | 323 | 0.37 | 2 | 2 | 2 | tier3 | shared           | 1 |
| 11 | 54809368  | 55052792  | A | - | 386 | 3  | 0.01 | 240 | 171 | 0.42 | 367  | 218 | 0.37 | 2 | 2 | 2 | tier3 | shared           | 1 |
| 11 | 56001745  | 56245169  | T | A | 648 | 7  | 0.01 | 349 | 299 | 0.46 | 393  | 311 | 0.44 | 2 | 2 | 2 | tier3 | shared           | 1 |
| 11 | 58285661  | 58529085  | C | G | 715 | 13 | 0.02 | 459 | 419 | 0.48 | 1126 | 138 | 0.11 | 2 | 2 | 2 | tier3 | shared           | 1 |
| 11 | 61231163  | 61474587  | C | T | 279 | 0  | 0.00 | 315 | 4   | 0.01 | 133  | 58  | 0.30 | 2 | 2 | 2 | tier3 | relapse-specific | 1 |
| 11 | 64708652  | 64952076  | A | G | 400 | 8  | 0.02 | 237 | 162 | 0.41 | 243  | 171 | 0.41 | 2 | 2 | 2 | tier2 | shared           | 1 |
| 11 | 71927795  | 72250147  | C | A | 475 | 4  | 0.01 | 274 | 229 | 0.46 | 758  | 461 | 0.38 | 2 | 2 | 2 | tier3 | shared           | 1 |
| 11 | 72603052  | 72925404  | G | A | 256 | 4  | 0.02 | 221 | 192 | 0.46 | 171  | 128 | 0.43 | 2 | 2 | 2 | tier2 | shared           | 1 |
| 11 | 72623244  | 72945596  | G | T | 605 | 10 | 0.02 | 340 | 291 | 0.46 | 316  | 40  | 0.11 | 2 | 2 | 2 | tier1 | shared           | 2 |
| 11 | 75643493  | 75965845  | A | G | 496 | 4  | 0.01 | 337 | 282 | 0.46 | 475  | 384 | 0.45 | 2 | 2 | 2 | tier3 | shared           | 1 |
| 11 | 81152507  | 81474859  | C | T | 730 | 9  | 0.01 | 486 | 376 | 0.44 | 1163 | 153 | 0.12 | 2 | 2 | 2 | tier3 | shared           | 1 |
| 11 | 81336777  | 81659129  | A | G | 637 | 7  | 0.01 | 452 | 318 | 0.41 | 1008 | 126 | 0.11 | 2 | 2 | 2 | tier3 | shared           | 1 |
| 11 | 84939643  | 85261995  | C | A | 791 | 6  | 0.01 | 477 | 374 | 0.44 | 865  | 530 | 0.38 | 2 | 2 | 2 | tier3 | shared           | 1 |
| 11 | 90823611  | 91183963  | A | T | 409 | 7  | 0.02 | 252 | 250 | 0.50 | 232  | 224 | 0.49 | 2 | 2 | 2 | tier3 | shared           | 1 |
| 11 | 93400566  | 93760918  | C | T | 888 | 11 | 0.01 | 494 | 397 | 0.45 | 1122 | 804 | 0.42 | 2 | 2 | 2 | tier3 | shared           | 1 |
| 11 | 94446918  | 94807270  | G | A | 819 | 9  | 0.01 | 508 | 421 | 0.45 | 689  | 514 | 0.43 | 2 | 2 | 2 | tier3 | shared           | 1 |
| 11 | 95840778  | 96201130  | A | G | 747 | 14 | 0.02 | 549 | 410 | 0.43 | 1233 | 937 | 0.43 | 2 | 2 | 2 | tier3 | shared           | 1 |
| 11 | 9755975   | 9799399   | C | T | 662 | 7  | 0.01 | 392 | 324 | 0.45 | 387  | 273 | 0.41 | 2 | 2 | 2 | tier2 | shared           | 1 |
| 11 | 98865252  | 99360042  | C | T | 926 | 12 | 0.01 | 558 | 394 | 0.41 | 609  | 382 | 0.39 | 2 | 2 | 2 | tier3 | shared           | 1 |
| 12 | 103709935 | 105185805 | C | T | 835 | 6  | 0.01 | 498 | 347 | 0.41 | 673  | 471 | 0.41 | 2 | 2 | 2 | tier3 | shared           | 0 |
| 12 | 103754970 | 105230840 | C | A | 569 | 9  | 0.02 | 443 | 326 | 0.42 | 543  | 339 | 0.38 | 2 | 2 | 2 | tier3 | shared           | 0 |
| 12 | 113791667 | 115307284 | G | A | 435 | 8  | 0.02 | 277 | 271 | 0.49 | 709  | 427 | 0.38 | 2 | 2 | 2 | tier3 | shared           | 1 |
| 12 | 11544130  | 11652863  | C | A | 330 | 6  | 0.02 | 220 | 146 | 0.40 | 381  | 54  | 0.12 | 2 | 2 | 2 | tier3 | shared           | 0 |
| 12 | 115524734 | 117040351 | G | C | 858 | 18 | 0.02 | 479 | 351 | 0.42 | 629  | 442 | 0.41 | 2 | 2 | 2 | tier3 | shared           | 0 |
| 12 | 117878438 | 119394055 | C | T | 651 | 4  | 0.01 | 687 | 159 | 0.19 | 1907 | 1   | 0.00 | 2 | 2 | 2 | tier3 | tumor-specific   | 0 |
| 12 | 117977733 | 119493350 | C | T | 815 | 1  | 0.00 | 882 | 6   | 0.01 | 1310 | 624 | 0.32 | 2 | 2 | 2 | tier2 | relapse-specific | 0 |
| 12 | 118090574 | 119606191 | G | A | 492 | 10 | 0.02 | 377 | 307 | 0.45 | 549  | 433 | 0.44 | 2 | 2 | 2 | tier3 | shared           | 0 |
| 12 | 118985298 | 120500915 | T | C | 527 | 12 | 0.02 | 392 | 326 | 0.45 | 580  | 377 | 0.39 | 2 | 2 | 2 | tier3 | shared           | 0 |
| 12 | 125587394 | 127021441 | A | T | 753 | 12 | 0.02 | 506 | 432 | 0.46 | 655  | 457 | 0.41 | 2 | 2 | 2 | tier3 | shared           | 0 |
| 12 | 127744443 | 129178490 | G | A | 488 | 8  | 0.02 | 330 | 241 | 0.42 | 598  | 85  | 0.12 | 2 | 2 | 2 | tier1 | shared           | 1 |
| 12 | 17634611  | 17743344  | G | A | 612 | 2  | 0.00 | 463 | 357 | 0.44 | 867  | 104 | 0.11 | 2 | 2 | 2 | tier3 | shared           | 1 |
| 12 | 22501031  | 22609764  | A | G | 349 | 3  | 0.01 | 186 | 166 | 0.47 | 246  | 219 | 0.47 | 2 | 2 | 2 | tier3 | shared           | 0 |
| 12 | 38252047  | 39965780  | C | T | 426 | 8  | 0.02 | 248 | 197 | 0.44 | 293  | 212 | 0.42 | 2 | 2 | 2 | tier3 | shared           | 0 |
| 12 | 39750696  | 41464429  | T | C | 549 | 9  | 0.02 | 315 | 219 | 0.41 | 474  | 59  | 0.11 | 2 | 2 | 2 | tier3 | shared           | 0 |
| 12 | 40738362  | 42452095  | T | C | 760 | 5  | 0.01 | 318 | 253 | 0.44 | 369  | 249 | 0.40 | 2 | 2 | 2 | tier3 | shared           | 0 |
| 12 | 45726711  | 47440444  | T | G | 470 | 6  | 0.01 | 411 | 314 | 0.43 | 843  | 575 | 0.41 | 2 | 2 | 2 | tier3 | shared           | 0 |
| 12 | 49922439  | 51636172  | A | G | 434 | 4  | 0.01 | 268 | 247 | 0.48 | 301  | 214 | 0.42 | 2 | 2 | 2 | tier1 | shared           | 1 |
| 12 | 52469557  | 54183290  | - | A | 608 | 9  | 0.01 | 381 | 258 | 0.40 | 846  | 502 | 0.37 | 2 | 2 | 2 | tier2 | shared           | 0 |
| 12 | 52630115  | 54343848  | G | A | 330 | 2  | 0.01 | 190 | 140 | 0.42 | 111  | 0   | 0.00 | 2 | 2 | 2 | tier2 | tumor-specific   | 0 |
| 12 | 60459060  | 62172793  | T | A | 761 | 14 | 0.02 | 391 | 353 | 0.47 | 985  | 704 | 0.42 | 2 | 2 | 2 | tier3 | shared           | 0 |

|    |           |           |     |   |     |    |      |      |     |      |      |      |      |   |   |   |       |                  |   |
|----|-----------|-----------|-----|---|-----|----|------|------|-----|------|------|------|------|---|---|---|-------|------------------|---|
| 12 | 6107212   | 6236951   | -   | A | 365 | 3  | 0.01 | 224  | 152 | 0.40 | 116  | 74   | 0.39 | 2 | 2 | 2 | tier3 | shared           | 2 |
| 12 | 61776966  | 63490699  | C   | T | 893 | 2  | 0.00 | 1053 | 10  | 0.01 | 2651 | 1140 | 0.30 | 2 | 2 | 2 | tier3 | relapse-specific | 0 |
| 12 | 65872532  | 67586265  | G   | A | 796 | 13 | 0.02 | 430  | 343 | 0.44 | 1738 | 233  | 0.12 | 2 | 2 | 2 | tier2 | shared           | 1 |
| 12 | 67318219  | 69031952  | G   | T | 421 | 7  | 0.02 | 288  | 236 | 0.45 | 338  | 206  | 0.38 | 2 | 2 | 2 | tier3 | shared           | 1 |
| 12 | 69743439  | 71457172  | T   | C | 668 | 6  | 0.01 | 465  | 390 | 0.46 | 562  | 375  | 0.40 | 2 | 2 | 2 | tier3 | shared           | 1 |
| 12 | 70646308  | 72360041  | T   | A | 509 | 12 | 0.02 | 353  | 266 | 0.43 | 556  | 397  | 0.42 | 2 | 2 | 2 | tier3 | shared           | 0 |
| 12 | 72126530  | 73840263  | G   | A | 324 | 6  | 0.02 | 203  | 138 | 0.40 | 233  | 151  | 0.39 | 2 | 2 | 2 | tier3 | shared           | 1 |
| 12 | 72620513  | 74334246  | T   | C | 533 | 0  | 0.00 | 696  | 5   | 0.01 | 448  | 211  | 0.32 | 2 | 2 | 2 | tier3 | relapse-specific | 0 |
| 12 | 76312842  | 77788711  | A   | G | 606 | 13 | 0.02 | 378  | 306 | 0.45 | 501  | 332  | 0.40 | 2 | 2 | 2 | tier3 | shared           | 1 |
| 12 | 76334367  | 77810236  | T   | C | 662 | 9  | 0.01 | 413  | 388 | 0.48 | 626  | 430  | 0.41 | 2 | 2 | 2 | tier3 | shared           | 1 |
| 12 | 78733687  | 80209556  | A   | T | 628 | 8  | 0.01 | 454  | 309 | 0.40 | 503  | 334  | 0.40 | 2 | 2 | 2 | tier3 | shared           | 1 |
| 12 | 82184702  | 83660571  | G   | C | 764 | 8  | 0.01 | 467  | 383 | 0.45 | 723  | 470  | 0.39 | 2 | 2 | 2 | tier3 | shared           | 1 |
| 12 | 82288736  | 83764605  | G   | C | 747 | 0  | 0.00 | 846  | 6   | 0.01 | 827  | 342  | 0.29 | 2 | 2 | 2 | tier3 | relapse-specific | 1 |
| 12 | 84100790  | 85576659  | C   | T | 639 | 8  | 0.01 | 402  | 350 | 0.47 | 381  | 264  | 0.41 | 2 | 2 | 2 | tier2 | shared           | 0 |
| 12 | 85649382  | 87125251  | A   | T | 521 | 4  | 0.01 | 344  | 274 | 0.44 | 498  | 358  | 0.42 | 2 | 2 | 2 | tier3 | shared           | 1 |
| 12 | 89300122  | 90775991  | T   | A | 455 | 9  | 0.02 | 312  | 287 | 0.48 | 586  | 461  | 0.44 | 2 | 2 | 2 | tier3 | shared           | 1 |
| 13 | 100669487 | 101871486 | C   | T | 411 | 6  | 0.01 | 323  | 258 | 0.44 | 949  | 661  | 0.41 | 2 | 2 | 2 | tier3 | shared           | 2 |
| 13 | 106731186 | 107933185 | G   | A | 835 | 6  | 0.01 | 460  | 294 | 0.39 | 382  | 218  | 0.36 | 2 | 2 | 2 | tier3 | shared           | 1 |
| 13 | 107168273 | 108370272 | T   | A | 682 | 6  | 0.01 | 381  | 338 | 0.47 | 726  | 483  | 0.40 | 2 | 2 | 2 | tier3 | shared           | 1 |
| 13 | 107421580 | 108623579 | T   | A | 439 | 0  | 0.00 | 487  | 3   | 0.01 | 469  | 196  | 0.29 | 2 | 2 | 2 | tier3 | relapse-specific | 1 |
| 13 | 20933001  | 22035001  | G   | C | 694 | 12 | 0.02 | 438  | 343 | 0.44 | 482  | 424  | 0.47 | 2 | 2 | 2 | tier3 | shared           | 0 |
| 13 | 22408757  | 23510757  | C   | T | 533 | 5  | 0.01 | 437  | 234 | 0.35 | 259  | 161  | 0.38 | 2 | 2 | 2 | tier3 | shared           | 0 |
| 13 | 26223165  | 27325165  | G   | A | 642 | 4  | 0.01 | 351  | 282 | 0.45 | 281  | 206  | 0.42 | 2 | 2 | 2 | tier3 | shared           | 0 |
| 13 | 26668487  | 27770487  | G   | A | 434 | 8  | 0.02 | 310  | 280 | 0.47 | 626  | 84   | 0.12 | 2 | 2 | 2 | tier3 | shared           | 0 |
| 13 | 27190634  | 28292634  | T   | C | 505 | 10 | 0.02 | 291  | 255 | 0.47 | 814  | 616  | 0.43 | 2 | 2 | 2 | tier3 | shared           | 0 |
| 13 | 31988250  | 33090250  | T   | C | 746 | 4  | 0.01 | 467  | 385 | 0.45 | 514  | 384  | 0.43 | 2 | 2 | 2 | tier3 | shared           | 0 |
| 13 | 35326695  | 36428695  | G   | A | 399 | 0  | 0.00 | 537  | 3   | 0.01 | 367  | 174  | 0.32 | 2 | 2 | 2 | tier1 | relapse-specific | 1 |
| 13 | 36859103  | 37961103  | T   | - | 913 | 15 | 0.02 | 718  | 542 | 0.43 | 1362 | 955  | 0.41 | 2 | 2 | 2 | tier3 | shared           | 1 |
| 13 | 37195144  | 38297144  | T   | A | 622 | 3  | 0.00 | 485  | 365 | 0.43 | 708  | 517  | 0.42 | 2 | 2 | 2 | tier3 | shared           | 0 |
| 13 | 39334932  | 40436932  | A   | G | 595 | 7  | 0.01 | 413  | 370 | 0.47 | 883  | 580  | 0.40 | 2 | 2 | 2 | tier3 | shared           | 0 |
| 13 | 41995685  | 43097685  | C   | T | 606 | 5  | 0.01 | 454  | 337 | 0.43 | 627  | 510  | 0.45 | 2 | 2 | 2 | tier3 | shared           | 0 |
| 13 | 45021967  | 46123966  | C   | T | 696 | 18 | 0.03 | 429  | 370 | 0.46 | 922  | 590  | 0.39 | 2 | 2 | 2 | tier3 | shared           | 0 |
| 13 | 46200945  | 47302944  | G   | A | 797 | 17 | 0.02 | 418  | 313 | 0.43 | 735  | 489  | 0.40 | 2 | 2 | 2 | tier3 | shared           | 0 |
| 13 | 48940144  | 50042143  | TTC | - | 359 | 2  | 0.01 | 245  | 63  | 0.20 | 242  | 46   | 0.16 | 2 | 2 | 2 | tier3 | shared           | 0 |
| 13 | 51283947  | 52385946  | C   | T | 645 | 12 | 0.02 | 429  | 298 | 0.41 | 338  | 51   | 0.13 | 2 | 2 | 2 | tier3 | shared           | 1 |
| 13 | 52485031  | 53587030  | A   | G | 626 | 12 | 0.02 | 386  | 317 | 0.45 | 978  | 768  | 0.44 | 2 | 2 | 2 | tier3 | shared           | 0 |
| 13 | 53087241  | 54189240  | G   | A | 683 | 0  | 0.00 | 820  | 8   | 0.01 | 583  | 266  | 0.31 | 2 | 2 | 2 | tier3 | relapse-specific | 1 |
| 13 | 54281740  | 55383739  | T   | A | 789 | 12 | 0.01 | 474  | 408 | 0.46 | 496  | 332  | 0.40 | 2 | 2 | 2 | tier3 | shared           | 1 |
| 13 | 56387864  | 57489863  | A   | G | 731 | 9  | 0.01 | 510  | 353 | 0.41 | 709  | 72   | 0.09 | 2 | 2 | 2 | tier3 | shared           | 0 |
| 13 | 56609499  | 57711498  | C   | T | 374 | 1  | 0.00 | 320  | 84  | 0.21 | 440  | 0    | 0.00 | 2 | 2 | 2 | tier3 | tumor-specific   | 0 |



|    |           |           |       |   |     |    |      |     |     |      |      |      |      |   |   |   |       |                  |   |
|----|-----------|-----------|-------|---|-----|----|------|-----|-----|------|------|------|------|---|---|---|-------|------------------|---|
| 13 | 56856089  | 57958088  | T     | A | 493 | 0  | 0.00 | 539 | 4   | 0.01 | 547  | 249  | 0.31 | 2 | 2 | 2 | tier3 | relapse-specific | 1 |
| 13 | 60085869  | 61187868  | C     | T | 510 | 5  | 0.01 | 328 | 262 | 0.44 | 591  | 456  | 0.44 | 2 | 2 | 2 | tier2 | shared           | 0 |
| 13 | 64007406  | 65109405  | C     | T | 515 | 0  | 0.00 | 594 | 13  | 0.02 | 352  | 156  | 0.31 | 2 | 2 | 2 | tier3 | shared           | 1 |
| 13 | 65644339  | 66746338  | G     | A | 752 | 3  | 0.00 | 545 | 351 | 0.39 | 970  | 0    | 0.00 | 2 | 2 | 2 | tier2 | tumor-specific   | 1 |
| 13 | 67847605  | 68949604  | G     | A | 495 | 5  | 0.01 | 339 | 275 | 0.45 | 689  | 448  | 0.39 | 2 | 2 | 2 | tier3 | shared           | 0 |
| 13 | 69610861  | 70712860  | A     | G | 455 | 7  | 0.02 | 259 | 263 | 0.50 | 323  | 258  | 0.44 | 2 | 2 | 2 | tier3 | shared           | 0 |
| 13 | 72336490  | 73438489  | G     | A | 669 | 10 | 0.01 | 393 | 318 | 0.45 | 809  | 487  | 0.38 | 2 | 2 | 2 | tier3 | shared           | 0 |
| 13 | 73191726  | 74293725  | C     | T | 533 | 5  | 0.01 | 356 | 245 | 0.41 | 573  | 360  | 0.39 | 2 | 2 | 2 | tier3 | shared           | 0 |
| 13 | 73478334  | 74580333  | T     | C | 593 | 8  | 0.01 | 379 | 322 | 0.46 | 800  | 604  | 0.43 | 2 | 2 | 2 | tier3 | shared           | 0 |
| 13 | 81894222  | 82996221  | C     | T | 162 | 4  | 0.02 | 84  | 40  | 0.32 | 72   | 31   | 0.30 | 2 | 2 | 2 | tier3 | shared           | 1 |
| 13 | 88659359  | 89861358  | C     | T | 511 | 12 | 0.02 | 308 | 247 | 0.45 | 316  | 208  | 0.40 | 2 | 2 | 2 | tier3 | shared           | 0 |
| 13 | 90922867  | 92124866  | T     | G | 455 | 6  | 0.01 | 285 | 218 | 0.43 | 411  | 292  | 0.42 | 2 | 2 | 2 | tier3 | shared           | 0 |
| 13 | 91524582  | 92726581  | G     | A | 504 | 9  | 0.02 | 455 | 292 | 0.39 | 840  | 552  | 0.40 | 2 | 2 | 2 | tier3 | shared           | 0 |
| 13 | 92660004  | 93862003  | C     | G | 720 | 6  | 0.01 | 481 | 340 | 0.41 | 883  | 116  | 0.12 | 2 | 2 | 2 | tier3 | shared           | 0 |
| 13 | 98449678  | 99651677  | A     | G | 570 | 13 | 0.02 | 393 | 309 | 0.44 | 863  | 644  | 0.43 | 2 | 2 | 2 | tier3 | shared           | 1 |
| 14 | 104264418 | 105193373 | CTGGT | - | 400 | 0  | 0.00 | 233 | 155 | 0.40 | 55   | 28   | 0.34 | 2 | 2 | 2 | tier3 | shared           | 1 |
| 14 | 104906418 | 105835373 | G     | A | 339 | 9  | 0.03 | 180 | 180 | 0.50 | 32   | 37   | 0.54 | 2 | 2 | 2 | tier2 | shared           | 0 |
| 14 | 26940065  | 27870225  | A     | T | 459 | 3  | 0.01 | 370 | 269 | 0.42 | 772  | 490  | 0.39 | 2 | 2 | 2 | tier3 | shared           | 0 |
| 14 | 27025730  | 27955890  | C     | A | 533 | 2  | 0.00 | 629 | 145 | 0.19 | 1059 | 1    | 0.00 | 2 | 2 | 2 | tier3 | tumor-specific   | 0 |
| 14 | 27882666  | 28812915  | C     | T | 679 | 7  | 0.01 | 451 | 379 | 0.46 | 964  | 648  | 0.40 | 2 | 2 | 2 | tier3 | shared           | 1 |
| 14 | 28018404  | 28948653  | A     | T | 750 | 3  | 0.00 | 816 | 12  | 0.01 | 685  | 338  | 0.33 | 2 | 2 | 2 | tier3 | relapse-specific | 1 |
| 14 | 29564667  | 30494916  | C     | T | 612 | 10 | 0.02 | 385 | 308 | 0.44 | 660  | 502  | 0.43 | 2 | 2 | 2 | tier3 | shared           | 1 |
| 14 | 37892347  | 38822596  | A     | G | 800 | 8  | 0.01 | 519 | 419 | 0.45 | 738  | 419  | 0.36 | 2 | 2 | 2 | tier3 | shared           | 1 |
| 14 | 39052401  | 39982650  | G     | A | 757 | 11 | 0.01 | 385 | 393 | 0.51 | 610  | 468  | 0.43 | 2 | 2 | 2 | tier3 | shared           | 1 |
| 14 | 39324126  | 40254375  | G     | T | 731 | 9  | 0.01 | 441 | 334 | 0.43 | 1084 | 132  | 0.11 | 2 | 2 | 2 | tier3 | shared           | 1 |
| 14 | 42340455  | 43270705  | G     | A | 559 | 62 | 0.10 | 405 | 376 | 0.48 | 812  | 670  | 0.45 | 2 | 2 | 2 | tier3 | shared           | 1 |
| 14 | 43332212  | 44262462  | A     | G | 654 | 11 | 0.02 | 440 | 374 | 0.46 | 421  | 304  | 0.42 | 2 | 2 | 2 | tier2 | shared           | 1 |
| 14 | 51611289  | 52541539  | C     | T | 457 | 6  | 0.01 | 378 | 302 | 0.44 | 387  | 297  | 0.43 | 2 | 2 | 2 | tier3 | shared           | 1 |
| 14 | 57443387  | 58373634  | C     | T | 908 | 12 | 0.01 | 592 | 470 | 0.44 | 2100 | 0    | 0.00 | 2 | 2 | 2 | tier3 | tumor-specific   | 1 |
| 14 | 57455787  | 58386034  | A     | G | 600 | 7  | 0.01 | 447 | 299 | 0.40 | 545  | 393  | 0.42 | 2 | 2 | 2 | tier3 | shared           | 1 |
| 14 | 68077979  | 69008226  | C     | A | 493 | 8  | 0.02 | 310 | 275 | 0.47 | 677  | 456  | 0.40 | 2 | 2 | 2 | tier3 | shared           | 0 |
| 14 | 69464698  | 70394945  | G     | T | 302 | 1  | 0.00 | 340 | 3   | 0.01 | 465  | 205  | 0.31 | 2 | 2 | 2 | tier3 | relapse-specific | 0 |
| 14 | 82080398  | 83010645  | C     | A | 929 | 13 | 0.01 | 515 | 436 | 0.46 | 1309 | 164  | 0.11 | 2 | 2 | 2 | tier3 | shared           | 1 |
| 14 | 82270165  | 83200412  | A     | G | 633 | 6  | 0.01 | 393 | 338 | 0.46 | 1080 | 880  | 0.45 | 2 | 2 | 2 | tier3 | shared           | 0 |
| 14 | 83340615  | 84270862  | C     | A | 616 | 9  | 0.01 | 378 | 295 | 0.44 | 545  | 341  | 0.38 | 2 | 2 | 2 | tier3 | shared           | 1 |
| 14 | 84412327  | 85342574  | C     | T | 623 | 2  | 0.00 | 376 | 251 | 0.40 | 514  | 61   | 0.11 | 2 | 2 | 2 | tier3 | shared           | 1 |
| 14 | 84486691  | 85416938  | T     | C | 834 | 12 | 0.01 | 457 | 375 | 0.45 | 930  | 717  | 0.44 | 2 | 2 | 2 | tier3 | shared           | 1 |
| 14 | 86134598  | 87064845  | C     | A | 462 | 3  | 0.01 | 359 | 251 | 0.41 | 795  | 108  | 0.12 | 2 | 2 | 2 | tier3 | shared           | 1 |
| 14 | 88453068  | 89383315  | A     | G | 753 | 13 | 0.02 | 512 | 472 | 0.48 | 1856 | 1497 | 0.45 | 2 | 2 | 2 | tier3 | shared           | 0 |
| 14 | 89541452  | 90471699  | G     | A | 557 | 9  | 0.02 | 335 | 234 | 0.41 | 465  | 317  | 0.41 | 2 | 2 | 2 | tier3 | shared           | 0 |

|    |          |          |       |   |      |    |      |     |     |      |      |      |      |   |      |   |       |                  |    |
|----|----------|----------|-------|---|------|----|------|-----|-----|------|------|------|------|---|------|---|-------|------------------|----|
| 14 | 90229295 | 91159542 | TGGC  | - | 692  | 9  | 0.01 | 381 | 313 | 0.45 | 865  | 456  | 0.35 | 2 | 2    | 2 | tier3 | shared           | 0  |
| 14 | 93157337 | 94087584 | G     | A | 522  | 1  | 0.00 | 608 | 12  | 0.02 | 940  | 490  | 0.34 | 2 | 2    | 2 | tier2 | relapse-specific | 0  |
| 14 | 94649887 | 95580134 | C     | G | 480  | 7  | 0.01 | 338 | 287 | 0.46 | 570  | 348  | 0.38 | 2 | 2    | 2 | tier3 | shared           | 0  |
| 14 | 98408503 | 99338750 | A     | G | 667  | 15 | 0.02 | 446 | 381 | 0.46 | 974  | 691  | 0.42 | 2 | 2    | 2 | tier3 | shared           | 1  |
| 15 | 24514103 | 26963010 | G     | A | 749  | 14 | 0.02 | 519 | 401 | 0.44 | 1574 | 1101 | 0.41 | 2 | 2    | 2 | tier3 | shared           | 0  |
| 15 | 35169607 | 37382315 | T     | A | 382  | 6  | 0.02 | 236 | 180 | 0.43 | 163  | 103  | 0.39 | 2 | 2    | 2 | tier3 | shared           | 0  |
| 15 | 39166414 | 41379122 | T     | C | 713  | 1  | 0.00 | 847 | 4   | 0.00 | 1030 | 309  | 0.23 | 2 | 2    | 2 | tier3 | relapse-specific | 0  |
| 15 | 46164943 | 48377651 | T     | C | 712  | 6  | 0.01 | 356 | 279 | 0.44 | 1141 | 820  | 0.42 | 2 | 2    | 2 | tier3 | shared           | 0  |
| 15 | 49315348 | 51528056 | G     | A | 717  | 13 | 0.02 | 383 | 355 | 0.48 | 676  | 465  | 0.41 | 2 | 2    | 2 | tier3 | shared           | 1  |
| 15 | 51906137 | 54118845 | C     | T | 570  | 8  | 0.01 | 447 | 328 | 0.42 | 451  | 317  | 0.41 | 2 | 2    | 2 | tier3 | shared           | 1  |
| 15 | 55462340 | 57675048 | A     | G | 473  | 7  | 0.01 | 345 | 274 | 0.44 | 312  | 243  | 0.44 | 2 | 2    | 2 | tier2 | shared           | 0  |
| 15 | 56211412 | 58424120 | C     | A | 616  | 8  | 0.01 | 478 | 370 | 0.44 | 934  | 668  | 0.42 | 2 | 2    | 2 | tier3 | shared           | 0  |
| 15 | 61140600 | 63353547 | G     | A | 828  | 6  | 0.01 | 813 | 206 | 0.20 | 1359 | 0    | 0.00 | 2 | 2    | 2 | tier3 | tumor-specific   | 0  |
| 15 | 62677332 | 64890279 | G     | A | 728  | 9  | 0.01 | 419 | 316 | 0.43 | 595  | 405  | 0.41 | 2 | 2    | 2 | tier3 | shared           | 1  |
| 15 | 64498952 | 66711898 | ATTTT | - | 662  | 6  | 0.01 | 483 | 322 | 0.40 | 688  | 494  | 0.42 | 2 | 2    | 2 | tier3 | shared           | 0  |
| 15 | 65312917 | 67525863 | C     | T | 664  | 12 | 0.02 | 372 | 306 | 0.45 | 666  | 462  | 0.41 | 2 | 2    | 2 | tier3 | shared           | 0  |
| 15 | 81513464 | 83722460 | C     | T | 542  | 8  | 0.01 | 266 | 227 | 0.46 | 262  | 160  | 0.38 | 2 | 2    | 2 | tier3 | shared           | 1  |
| 15 | 88432938 | 90631934 | C     | A | 740  | 12 | 0.02 | 381 | 307 | 0.45 | 553  | 67   | 0.11 | 2 | 2    | 2 | tier1 | shared           | 21 |
| 15 | 88432939 | 90631935 | G     | A | 742  | 0  | 0.00 | 678 | 7   | 0.01 | 414  | 202  | 0.33 | 2 | 2    | 2 | tier1 | relapse-specific | 21 |
| 15 | 93527184 | 95726180 | A     | G | 271  | 7  | 0.03 | 174 | 157 | 0.47 | 134  | 88   | 0.40 | 2 | 2    | 2 | tier3 | shared           | 1  |
| 15 | 94349247 | 96548243 | G     | A | 482  | 4  | 0.01 | 294 | 239 | 0.45 | 592  | 345  | 0.37 | 2 | 2    | 2 | tier3 | shared           | 1  |
| 15 | 94782752 | 96981748 | C     | T | 597  | 11 | 0.02 | 371 | 269 | 0.42 | 553  | 420  | 0.43 | 2 | 2    | 2 | tier2 | shared           | 0  |
| 15 | 97308324 | 99490801 | C     | T | 463  | 4  | 0.01 | 314 | 219 | 0.41 | 375  | 204  | 0.35 | 2 | 2    | 2 | tier3 | shared           | 0  |
| 16 | 10721523 | 10814022 | G     | A | 390  | 4  | 0.01 | 276 | 200 | 0.42 | 199  | 0    | 0.00 | 2 | 2    | 2 | tier3 | tumor-specific   | 0  |
| 16 | 19190727 | 19283226 | G     | A | 522  | 3  | 0.01 | 341 | 282 | 0.45 | 1005 | 148  | 0.13 | 2 | 2    | 2 | tier2 | shared           | 0  |
| 16 | 22640933 | 22733432 | C     | T | 185  | 1  | 0.01 | 214 | 5   | 0.02 | 210  | 109  | 0.34 | 2 | 2    | 2 | tier3 | shared           | 1  |
| 16 | 23026044 | 23118543 | C     | G | 1157 | 16 | 0.01 | 661 | 543 | 0.45 | 1512 | 1027 | 0.40 | 2 | 2    | 2 | tier3 | shared           | 0  |
| 16 | 24173849 | 24266348 | G     | A | 943  | 8  | 0.01 | 601 | 402 | 0.40 | 801  | 81   | 0.09 | 2 | 2    | 2 | tier2 | shared           | 0  |
| 16 | 26547638 | 26640137 | G     | T | 510  | 0  | 0.00 | 650 | 3   | 0.00 | 933  | 427  | 0.31 | 2 | 2    | 2 | tier3 | relapse-specific | 0  |
| 16 | 30758901 | 30851400 | C     | T | 617  | 1  | 0.00 | 826 | 12  | 0.01 | 548  | 206  | 0.27 | 2 | 2    | 2 | tier3 | relapse-specific | 0  |
| 16 | 31290499 | 31382998 | C     | T | 604  | 7  | 0.01 | 270 | 281 | 0.51 | 285  | 286  | 0.50 | 2 | 2    | 2 | tier1 | shared           | 1  |
| 16 | 32090319 | 32182818 | G     | A | 119  | 0  | 0.00 | 99  | 51  | 0.34 | 116  | 48   | 0.29 | 2 | 0.37 | 2 | tier2 | shared           | 1  |
| 16 | 3347262  | 3407261  | A     | C | 798  | 11 | 0.01 | 499 | 378 | 0.43 | 719  | 509  | 0.41 | 2 | 2    | 2 | tier3 | shared           | 0  |
| 16 | 47728294 | 49170793 | C     | A | 423  | 8  | 0.02 | 259 | 222 | 0.46 | 404  | 254  | 0.39 | 2 | 2    | 2 | tier3 | shared           | 1  |
| 16 | 50053507 | 51496006 | G     | A | 755  | 8  | 0.01 | 430 | 371 | 0.46 | 1290 | 911  | 0.41 | 2 | 2    | 2 | tier3 | shared           | 1  |
| 16 | 51061458 | 52503957 | G     | A | 728  | 10 | 0.01 | 423 | 354 | 0.46 | 1619 | 2    | 0.00 | 2 | 2    | 2 | tier2 | tumor-specific   | 1  |
| 16 | 51097779 | 52540278 | C     | T | 687  | 16 | 0.02 | 490 | 369 | 0.43 | 579  | 474  | 0.45 | 2 | 2    | 2 | tier3 | shared           | 1  |
| 16 | 52416962 | 53859461 | G     | T | 611  | 9  | 0.01 | 391 | 335 | 0.46 | 496  | 345  | 0.41 | 2 | 2    | 2 | tier3 | shared           | 0  |
| 16 | 54645012 | 56087511 | C     | T | 493  | 3  | 0.01 | 377 | 257 | 0.41 | 1212 | 7    | 0.01 | 2 | 2    | 2 | tier3 | tumor-specific   | 1  |
| 16 | 56639569 | 58082068 | C     | T | 305  | 4  | 0.01 | 178 | 177 | 0.50 | 74   | 79   | 0.52 | 2 | 2    | 2 | tier3 | shared           | 0  |

|    |          |          |      |    |      |    |      |     |     |      |      |      |      |   |   |   |       |                  |   |
|----|----------|----------|------|----|------|----|------|-----|-----|------|------|------|------|---|---|---|-------|------------------|---|
| 16 | 60206305 | 61648804 | C    | T  | 570  | 14 | 0.02 | 318 | 212 | 0.40 | 562  | 325  | 0.37 | 2 | 2 | 2 | tier2 | shared           | 1 |
| 16 | 60215077 | 61657576 | A    | T  | 790  | 9  | 0.01 | 458 | 425 | 0.48 | 982  | 644  | 0.40 | 2 | 2 | 2 | tier3 | shared           | 1 |
| 16 | 61457580 | 62900079 | T    | A  | 560  | 5  | 0.01 | 320 | 263 | 0.45 | 520  | 337  | 0.39 | 2 | 2 | 2 | tier3 | shared           | 0 |
| 16 | 6495209  | 6555208  | T    | C  | 795  | 8  | 0.01 | 478 | 406 | 0.46 | 744  | 543  | 0.42 | 2 | 2 | 2 | tier3 | shared           | 0 |
| 16 | 6654431  | 6714430  | G    | A  | 926  | 13 | 0.01 | 499 | 485 | 0.49 | 1448 | 1026 | 0.41 | 2 | 2 | 2 | tier3 | shared           | 0 |
| 16 | 70613693 | 72056192 | C    | T  | 577  | 0  | 0.00 | 637 | 7   | 0.01 | 427  | 154  | 0.27 | 2 | 2 | 2 | tier3 | relapse-specific | 0 |
| 16 | 75360773 | 76803272 | T    | G  | 471  | 10 | 0.02 | 344 | 253 | 0.42 | 820  | 590  | 0.42 | 2 | 2 | 2 | tier3 | shared           | 1 |
| 16 | 75496799 | 76939298 | T    | -  | 637  | 3  | 0.00 | 430 | 309 | 0.42 | 806  | 489  | 0.38 | 2 | 2 | 2 | tier3 | shared           | 1 |
| 16 | 76093122 | 77535621 | G    | A  | 884  | 0  | 0.00 | 971 | 8   | 0.01 | 1011 | 370  | 0.27 | 2 | 2 | 2 | tier3 | relapse-specific | 1 |
| 16 | 80961258 | 82403757 | C    | T  | 812  | 0  | 0.00 | 864 | 11  | 0.01 | 956  | 450  | 0.32 | 2 | 2 | 2 | tier3 | relapse-specific | 1 |
| 16 | 84568369 | 86010868 | G    | A  | 649  | 11 | 0.02 | 398 | 342 | 0.46 | 309  | 268  | 0.46 | 2 | 2 | 2 | tier3 | shared           | 1 |
| 16 | 84779125 | 86221624 | C    | T  | 518  | 5  | 0.01 | 411 | 237 | 0.37 | 761  | 432  | 0.36 | 2 | 2 | 2 | tier3 | shared           | 1 |
| 16 | 84887353 | 86329852 | G    | A  | 381  | 7  | 0.02 | 297 | 185 | 0.38 | 199  | 125  | 0.39 | 2 | 2 | 2 | tier3 | shared           | 0 |
| 16 | 88525341 | 89997840 | C    | T  | 382  | 0  | 0.00 | 456 | 6   | 0.01 | 90   | 49   | 0.35 | 2 | 2 | 2 | tier3 | relapse-specific | 1 |
| 17 | 10874727 | 10934002 | C    | T  | 307  | 0  | 0.00 | 414 | 5   | 0.01 | 515  | 240  | 0.32 | 2 | 2 | 2 | tier2 | relapse-specific | 0 |
| 17 | 10930752 | 10990027 | G    | A  | 513  | 14 | 0.03 | 343 | 291 | 0.46 | 724  | 505  | 0.41 | 2 | 2 | 2 | tier3 | shared           | 0 |
| 17 | 11228967 | 11288242 | C    | T  | 717  | 16 | 0.02 | 490 | 411 | 0.46 | 604  | 482  | 0.44 | 2 | 2 | 2 | tier3 | shared           | 0 |
| 17 | 12827463 | 12886738 | G    | T  | 876  | 10 | 0.01 | 560 | 397 | 0.41 | 681  | 92   | 0.12 | 2 | 2 | 2 | tier3 | shared           | 0 |
| 17 | 1405588  | 1458838  | G    | A  | 509  | 9  | 0.02 | 365 | 290 | 0.44 | 466  | 378  | 0.45 | 2 | 2 | 2 | tier2 | shared           | 0 |
| 17 | 17336440 | 17395715 | C    | T  | 866  | 8  | 0.01 | 525 | 370 | 0.41 | 496  | 1    | 0.00 | 2 | 2 | 2 | tier3 | tumor-specific   | 0 |
| 17 | 27591454 | 30567341 | G    | T  | 257  | 7  | 0.03 | 141 | 121 | 0.46 | 179  | 143  | 0.44 | 2 | 2 | 2 | tier3 | shared           | 0 |
| 17 | 27701282 | 30677169 | C    | A  | 320  | 0  | 0.00 | 361 | 5   | 0.01 | 121  | 55   | 0.31 | 2 | 2 | 2 | tier1 | relapse-specific | 0 |
| 17 | 29083093 | 32058980 | A    | G  | 455  | 9  | 0.02 | 354 | 274 | 0.44 | 863  | 565  | 0.40 | 2 | 2 | 2 | tier3 | shared           | 0 |
| 17 | 34007774 | 36754248 | C    | T  | 325  | 0  | 0.00 | 444 | 6   | 0.01 | 232  | 103  | 0.31 | 2 | 2 | 2 | tier3 | relapse-specific | 1 |
| 17 | 35242270 | 37988744 | -    | TA | 369  | 21 | 0.05 | 171 | 29  | 0.15 | 260  | 14   | 0.05 | 2 | 2 | 2 | tier3 | shared           | 1 |
| 17 | 39474680 | 42119154 | TTTG | -  | 895  | 13 | 0.01 | 557 | 409 | 0.42 | 747  | 506  | 0.40 | 2 | 2 | 2 | tier3 | shared           | 0 |
| 17 | 3989565  | 4042816  | C    | T  | 1030 | 14 | 0.01 | 572 | 535 | 0.48 | 874  | 655  | 0.43 | 2 | 2 | 2 | tier3 | shared           | 0 |
| 17 | 44439434 | 47084435 | T    | C  | 605  | 6  | 0.01 | 366 | 292 | 0.44 | 532  | 348  | 0.40 | 2 | 2 | 2 | tier3 | shared           | 0 |
| 17 | 48725946 | 51370947 | C    | T  | 614  | 12 | 0.02 | 396 | 311 | 0.44 | 579  | 379  | 0.40 | 2 | 2 | 2 | tier3 | shared           | 1 |
| 17 | 53499170 | 56144171 | G    | C  | 467  | 2  | 0.00 | 328 | 294 | 0.47 | 367  | 267  | 0.42 | 2 | 2 | 2 | tier3 | shared           | 0 |
| 17 | 53763621 | 56408622 | C    | G  | 369  | 9  | 0.02 | 241 | 180 | 0.43 | 138  | 117  | 0.46 | 2 | 2 | 2 | tier1 | shared           | 2 |
| 17 | 53763624 | 56408625 | T    | C  | 340  | 7  | 0.02 | 236 | 180 | 0.43 | 220  | 25   | 0.10 | 2 | 2 | 2 | tier1 | shared           | 2 |
| 17 | 55959266 | 58604484 | G    | A  | 845  | 7  | 0.01 | 554 | 423 | 0.43 | 697  | 93   | 0.12 | 2 | 2 | 2 | tier2 | shared           | 0 |
| 17 | 57103456 | 59748674 | C    | A  | 649  | 0  | 0.00 | 889 | 12  | 0.01 | 1076 | 458  | 0.30 | 2 | 2 | 2 | tier2 | relapse-specific | 0 |
| 17 | 58109959 | 60756227 | G    | A  | 496  | 7  | 0.01 | 316 | 268 | 0.46 | 235  | 190  | 0.45 | 2 | 2 | 2 | tier3 | shared           | 1 |
| 17 | 6183218  | 6242494  | G    | T  | 801  | 16 | 0.02 | 448 | 412 | 0.48 | 886  | 666  | 0.43 | 2 | 2 | 2 | tier3 | shared           | 1 |
| 17 | 67169186 | 69657591 | -    | T  | 598  | 2  | 0.00 | 370 | 246 | 0.40 | 811  | 449  | 0.36 | 2 | 2 | 2 | tier3 | shared           | 0 |
| 17 | 67336579 | 69824984 | C    | A  | 181  | 1  | 0.01 | 102 | 78  | 0.43 | 139  | 96   | 0.41 | 2 | 2 | 2 | tier3 | shared           | 1 |
| 17 | 68135164 | 70623569 | G    | A  | 357  | 5  | 0.01 | 170 | 131 | 0.44 | 137  | 92   | 0.40 | 2 | 2 | 2 | tier2 | shared           | 0 |
| 17 | 69391987 | 71880392 | C    | T  | 486  | 10 | 0.02 | 291 | 263 | 0.47 | 242  | 162  | 0.40 | 2 | 2 | 2 | tier3 | shared           | 1 |

|    |          |          |   |   |     |    |      |     |     |      |      |     |      |   |   |   |       |                  |   |
|----|----------|----------|---|---|-----|----|------|-----|-----|------|------|-----|------|---|---|---|-------|------------------|---|
| 17 | 7334949  | 7394225  | T | - | 314 | 0  | 0.00 | 590 | 6   | 0.01 | 275  | 105 | 0.28 | 2 | 2 | 2 | tier3 | relapse-specific | 1 |
| 17 | 75712847 | 78098252 | G | A | 566 | 0  | 0.00 | 569 | 4   | 0.01 | 113  | 58  | 0.34 | 2 | 2 | 2 | tier3 | relapse-specific | 0 |
| 17 | 75761724 | 78147129 | G | A | 449 | 8  | 0.02 | 337 | 177 | 0.34 | 337  | 200 | 0.37 | 2 | 2 | 2 | tier3 | shared           | 0 |
| 17 | 78537248 | 80943959 | C | A | 296 | 5  | 0.02 | 215 | 169 | 0.44 | 216  | 180 | 0.45 | 2 | 2 | 2 | tier3 | shared           | 0 |
| 18 | 11523657 | 11533657 | C | T | 439 | 6  | 0.01 | 255 | 206 | 0.45 | 389  | 1   | 0.00 | 2 | 2 | 2 | tier2 | tumor-specific   | 0 |
| 18 | 21636245 | 23382247 | C | T | 536 | 12 | 0.02 | 303 | 217 | 0.42 | 603  | 460 | 0.43 | 2 | 2 | 2 | tier3 | shared           | 0 |
| 18 | 23266563 | 25012565 | G | C | 535 | 0  | 0.00 | 655 | 5   | 0.01 | 584  | 252 | 0.30 | 2 | 2 | 2 | tier3 | relapse-specific | 0 |
| 18 | 25819633 | 27565635 | A | G | 760 | 8  | 0.01 | 408 | 355 | 0.47 | 560  | 385 | 0.41 | 2 | 2 | 2 | tier3 | shared           | 1 |
| 18 | 26755043 | 28501045 | C | T | 778 | 14 | 0.02 | 487 | 367 | 0.43 | 1154 | 833 | 0.42 | 2 | 2 | 2 | tier3 | shared           | 1 |
| 18 | 29671467 | 31417469 | T | A | 821 | 2  | 0.00 | 712 | 236 | 0.25 | 1051 | 0   | 0.00 | 2 | 2 | 2 | tier3 | tumor-specific   | 0 |
| 18 | 3244246  | 3254246  | T | G | 609 | 8  | 0.01 | 381 | 323 | 0.46 | 268  | 218 | 0.45 | 2 | 2 | 2 | tier3 | shared           | 0 |
| 18 | 35741493 | 37487495 | C | T | 661 | 10 | 0.01 | 453 | 371 | 0.45 | 786  | 547 | 0.41 | 2 | 2 | 2 | tier3 | shared           | 1 |
| 18 | 36665237 | 38411239 | C | A | 645 | 0  | 0.00 | 726 | 5   | 0.01 | 729  | 252 | 0.26 | 2 | 2 | 2 | tier3 | relapse-specific | 1 |
| 18 | 44444522 | 46190524 | C | T | 510 | 9  | 0.02 | 281 | 258 | 0.48 | 1192 | 851 | 0.42 | 2 | 2 | 2 | tier2 | shared           | 0 |
| 18 | 48158679 | 49904681 | A | - | 406 | 29 | 0.07 | 339 | 278 | 0.45 | 486  | 334 | 0.41 | 2 | 2 | 2 | tier3 | shared           | 0 |
| 18 | 48597561 | 50343563 | T | G | 473 | 1  | 0.00 | 424 | 1   | 0.00 | 403  | 165 | 0.29 | 2 | 2 | 2 | tier3 | relapse-specific | 0 |
| 18 | 51856664 | 53705666 | C | T | 737 | 12 | 0.02 | 448 | 432 | 0.49 | 525  | 418 | 0.44 | 2 | 2 | 2 | tier2 | shared           | 0 |
| 18 | 52300165 | 54149167 | C | G | 796 | 6  | 0.01 | 508 | 377 | 0.43 | 971  | 580 | 0.37 | 2 | 2 | 2 | tier2 | shared           | 1 |
| 18 | 52601661 | 54450663 | A | T | 653 | 2  | 0.00 | 371 | 313 | 0.46 | 613  | 394 | 0.39 | 2 | 2 | 2 | tier3 | shared           | 0 |
| 18 | 53076425 | 54925427 | C | T | 786 | 7  | 0.01 | 492 | 341 | 0.41 | 1249 | 8   | 0.01 | 2 | 2 | 2 | tier3 | tumor-specific   | 0 |
| 18 | 5752087  | 5762087  | C | A | 682 | 12 | 0.02 | 428 | 359 | 0.46 | 999  | 880 | 0.47 | 2 | 2 | 2 | tier3 | shared           | 0 |
| 18 | 65731094 | 67580114 | T | A | 629 | 10 | 0.02 | 444 | 382 | 0.46 | 826  | 577 | 0.41 | 2 | 2 | 2 | tier3 | shared           | 1 |
| 18 | 68062568 | 69911588 | C | A | 529 | 2  | 0.00 | 414 | 266 | 0.39 | 341  | 219 | 0.39 | 2 | 2 | 2 | tier3 | shared           | 1 |
| 18 | 68910507 | 70759527 | G | A | 531 | 10 | 0.02 | 390 | 313 | 0.45 | 466  | 282 | 0.38 | 2 | 2 | 2 | tier3 | shared           | 1 |
| 18 | 71709126 | 73580138 | G | A | 501 | 9  | 0.02 | 276 | 257 | 0.48 | 460  | 327 | 0.42 | 2 | 2 | 2 | tier3 | shared           | 1 |
| 18 | 71875808 | 73746820 | G | A | 770 | 10 | 0.01 | 471 | 424 | 0.47 | 625  | 466 | 0.43 | 2 | 2 | 2 | tier3 | shared           | 1 |
| 18 | 74063167 | 75962179 | G | A | 603 | 7  | 0.01 | 397 | 312 | 0.44 | 598  | 434 | 0.42 | 2 | 2 | 2 | tier3 | shared           | 1 |
| 18 | 8081041  | 8091041  | T | A | 761 | 9  | 0.01 | 417 | 338 | 0.45 | 768  | 521 | 0.40 | 2 | 2 | 2 | tier3 | shared           | 0 |
| 19 | 12640297 | 12779297 | T | C | 420 | 2  | 0.00 | 376 | 302 | 0.45 | 454  | 314 | 0.41 | 2 | 2 | 2 | tier2 | shared           | 0 |
| 19 | 12722617 | 12861617 | G | A | 464 | 5  | 0.01 | 380 | 313 | 0.45 | 592  | 471 | 0.44 | 2 | 2 | 2 | tier3 | shared           | 0 |
| 19 | 32989705 | 28297865 | G | A | 436 | 0  | 0.00 | 491 | 5   | 0.01 | 315  | 165 | 0.34 | 2 | 2 | 2 | tier3 | relapse-specific | 0 |
| 19 | 33202551 | 28510711 | C | T | 765 | 6  | 0.01 | 450 | 402 | 0.47 | 493  | 373 | 0.43 | 2 | 2 | 2 | tier3 | shared           | 1 |
| 19 | 34054026 | 29362186 | G | A | 613 | 18 | 0.03 | 397 | 325 | 0.45 | 359  | 290 | 0.45 | 2 | 2 | 2 | tier2 | shared           | 1 |
| 19 | 34208171 | 29516331 | A | T | 775 | 8  | 0.01 | 492 | 426 | 0.46 | 287  | 180 | 0.39 | 2 | 2 | 2 | tier3 | shared           | 0 |
| 19 | 41696897 | 37005057 | A | G | 501 | 0  | 0.00 | 582 | 7   | 0.01 | 326  | 129 | 0.28 | 2 | 2 | 2 | tier1 | relapse-specific | 0 |
| 19 | 42899759 | 38207919 | T | C | 737 | 6  | 0.01 | 446 | 338 | 0.43 | 667  | 0   | 0.00 | 2 | 2 | 2 | tier3 | tumor-specific   | 0 |
| 19 | 45027351 | 40335511 | A | G | 812 | 11 | 0.01 | 462 | 391 | 0.46 | 785  | 91  | 0.10 | 2 | 2 | 2 | tier3 | shared           | 0 |
| 19 | 50958451 | 46266611 | C | T | 395 | 2  | 0.01 | 222 | 203 | 0.48 | 259  | 25  | 0.09 | 2 | 2 | 2 | tier1 | shared           | 1 |
| 19 | 60109826 | 55418014 | C | T | 723 | 0  | 0.00 | 821 | 10  | 0.01 | 933  | 323 | 0.26 | 2 | 2 | 2 | tier1 | relapse-specific | 1 |
| 19 | 8512789  | 8606789  | C | T | 542 | 8  | 0.01 | 319 | 257 | 0.45 | 24   | 17  | 0.41 | 2 | 2 | 2 | tier1 | shared           | 2 |

|    |           |           |   |   |     |    |      |     |     |      |      |     |      |   |   |   |       |                  |   |
|----|-----------|-----------|---|---|-----|----|------|-----|-----|------|------|-----|------|---|---|---|-------|------------------|---|
| 19 | 8878800   | 9017800   | C | T | 540 | 2  | 0.00 | 342 | 277 | 0.45 | 2356 | 12  | 0.01 | 2 | 2 | 2 | tier3 | tumor-specific   | 9 |
| 2  | 100847570 | 101481138 | A | G | 461 | 5  | 0.01 | 300 | 313 | 0.51 | 831  | 610 | 0.42 | 2 | 2 | 2 | tier3 | shared           | 1 |
| 2  | 103280182 | 103913750 | C | T | 714 | 9  | 0.01 | 393 | 373 | 0.49 | 708  | 523 | 0.42 | 2 | 2 | 2 | tier3 | shared           | 1 |
| 2  | 104101578 | 104735146 | C | G | 673 | 5  | 0.01 | 367 | 303 | 0.45 | 588  | 371 | 0.39 | 2 | 2 | 2 | tier3 | shared           | 0 |
| 2  | 10820130  | 10902679  | C | T | 776 | 8  | 0.01 | 525 | 385 | 0.42 | 495  | 319 | 0.39 | 2 | 2 | 2 | tier3 | shared           | 0 |
| 2  | 114769762 | 115053292 | G | A | 711 | 0  | 0.00 | 756 | 12  | 0.02 | 527  | 238 | 0.31 | 2 | 2 | 2 | tier3 | relapse-specific | 0 |
| 2  | 115512252 | 115795782 | T | A | 389 | 1  | 0.00 | 271 | 239 | 0.47 | 164  | 156 | 0.49 | 2 | 2 | 2 | tier3 | shared           | 0 |
| 2  | 116413903 | 116697433 | A | G | 737 | 4  | 0.01 | 515 | 374 | 0.42 | 696  | 488 | 0.41 | 2 | 2 | 2 | tier3 | shared           | 1 |
| 2  | 117169781 | 117453311 | C | T | 679 | 8  | 0.01 | 412 | 259 | 0.39 | 467  | 312 | 0.40 | 2 | 2 | 2 | tier3 | shared           | 1 |
| 2  | 117243344 | 117526874 | T | A | 546 | 8  | 0.01 | 360 | 257 | 0.42 | 358  | 203 | 0.36 | 2 | 2 | 2 | tier3 | shared           | 1 |
| 2  | 117285122 | 117568652 | C | T | 437 | 2  | 0.00 | 276 | 188 | 0.41 | 206  | 132 | 0.39 | 2 | 2 | 2 | tier3 | shared           | 1 |
| 2  | 118858220 | 119141750 | G | A | 728 | 12 | 0.02 | 467 | 406 | 0.47 | 1267 | 184 | 0.13 | 2 | 2 | 2 | tier2 | shared           | 1 |
| 2  | 118907970 | 119191500 | C | T | 184 | 3  | 0.02 | 151 | 108 | 0.42 | 479  | 8   | 0.02 | 2 | 2 | 2 | tier3 | tumor-specific   | 1 |
| 2  | 121245170 | 121528700 | G | A | 541 | 8  | 0.01 | 309 | 232 | 0.43 | 272  | 194 | 0.42 | 2 | 2 | 2 | tier3 | shared           | 0 |
| 2  | 125456109 | 125739639 | T | C | 903 | 7  | 0.01 | 479 | 432 | 0.47 | 506  | 55  | 0.10 | 2 | 2 | 2 | tier3 | shared           | 0 |
| 2  | 130861607 | 131145137 | C | A | 579 | 8  | 0.01 | 391 | 310 | 0.44 | 313  | 245 | 0.44 | 2 | 2 | 2 | tier3 | shared           | 0 |
| 2  | 135984521 | 136268051 | G | A | 676 | 11 | 0.02 | 394 | 379 | 0.49 | 773  | 573 | 0.43 | 2 | 2 | 2 | tier3 | shared           | 0 |
| 2  | 137572784 | 137856314 | C | T | 537 | 4  | 0.01 | 384 | 319 | 0.45 | 613  | 431 | 0.41 | 2 | 2 | 2 | tier3 | shared           | 0 |
| 2  | 137663285 | 137946815 | C | T | 666 | 1  | 0.00 | 803 | 4   | 0.00 | 861  | 318 | 0.27 | 2 | 2 | 2 | tier2 | relapse-specific | 0 |
| 2  | 137781520 | 138065050 | C | T | 771 | 12 | 0.02 | 513 | 381 | 0.43 | 2164 | 247 | 0.10 | 2 | 2 | 2 | tier3 | shared           | 0 |
| 2  | 142683503 | 142967033 | T | C | 596 | 14 | 0.02 | 511 | 378 | 0.43 | 683  | 477 | 0.41 | 2 | 2 | 2 | tier3 | shared           | 1 |
| 2  | 143270836 | 143554366 | G | A | 456 | 0  | 0.00 | 713 | 16  | 0.02 | 665  | 330 | 0.33 | 2 | 2 | 2 | tier3 | shared           | 1 |
| 2  | 150797796 | 151089550 | G | C | 647 | 13 | 0.02 | 427 | 339 | 0.44 | 768  | 534 | 0.41 | 2 | 2 | 2 | tier3 | shared           | 1 |
| 2  | 153951142 | 154242896 | T | C | 794 | 9  | 0.01 | 526 | 368 | 0.41 | 1158 | 155 | 0.12 | 2 | 2 | 2 | tier3 | shared           | 0 |
| 2  | 154172284 | 154464038 | T | G | 569 | 5  | 0.01 | 394 | 299 | 0.43 | 580  | 390 | 0.40 | 2 | 2 | 2 | tier2 | shared           | 1 |
| 2  | 15628354  | 15710903  | A | G | 768 | 6  | 0.01 | 432 | 394 | 0.48 | 646  | 420 | 0.39 | 2 | 2 | 2 | tier3 | shared           | 1 |
| 2  | 15674817  | 15757366  | A | G | 547 | 10 | 0.02 | 383 | 335 | 0.47 | 284  | 232 | 0.45 | 2 | 2 | 2 | tier1 | shared           | 1 |
| 2  | 163820542 | 164112296 | C | T | 813 | 8  | 0.01 | 605 | 450 | 0.43 | 1368 | 4   | 0.00 | 2 | 2 | 2 | tier3 | tumor-specific   | 0 |
| 2  | 164530487 | 164822241 | C | T | 895 | 13 | 0.01 | 673 | 476 | 0.41 | 1463 | 1   | 0.00 | 2 | 2 | 2 | tier3 | tumor-specific   | 1 |
| 2  | 165928971 | 166220725 | G | A | 836 | 17 | 0.02 | 496 | 372 | 0.43 | 1120 | 129 | 0.10 | 2 | 2 | 2 | tier2 | shared           | 0 |
| 2  | 172605263 | 172897017 | T | A | 388 | 7  | 0.02 | 349 | 273 | 0.44 | 408  | 347 | 0.46 | 2 | 2 | 2 | tier2 | shared           | 0 |
| 2  | 176491050 | 176782804 | - | T | 786 | 9  | 0.01 | 491 | 375 | 0.43 | 486  | 301 | 0.38 | 2 | 2 | 2 | tier3 | shared           | 0 |
| 2  | 183982209 | 184273964 | G | A | 607 | 11 | 0.02 | 390 | 309 | 0.44 | 717  | 609 | 0.46 | 2 | 2 | 2 | tier3 | shared           | 1 |
| 2  | 185544371 | 185836126 | T | G | 520 | 10 | 0.02 | 358 | 273 | 0.43 | 349  | 48  | 0.12 | 2 | 2 | 2 | tier3 | shared           | 0 |
| 2  | 18760057  | 18896576  | G | A | 291 | 1  | 0.00 | 359 | 6   | 0.02 | 647  | 239 | 0.27 | 2 | 2 | 2 | tier3 | relapse-specific | 1 |
| 2  | 189386034 | 189677789 | T | C | 656 | 7  | 0.01 | 421 | 363 | 0.46 | 718  | 494 | 0.41 | 2 | 2 | 2 | tier2 | shared           | 0 |
| 2  | 196389158 | 196680913 | C | T | 570 | 5  | 0.01 | 333 | 227 | 0.41 | 415  | 289 | 0.41 | 2 | 2 | 2 | tier3 | shared           | 1 |
| 2  | 196910181 | 197201936 | G | A | 478 | 9  | 0.02 | 334 | 231 | 0.41 | 704  | 0   | 0.00 | 2 | 2 | 2 | tier3 | tumor-specific   | 0 |
| 2  | 210309605 | 210601360 | C | T | 635 | 12 | 0.02 | 436 | 387 | 0.47 | 777  | 565 | 0.42 | 2 | 2 | 2 | tier3 | shared           | 0 |
| 2  | 212678019 | 212969774 | G | A | 621 | 0  | 0.00 | 668 | 10  | 0.01 | 560  | 229 | 0.29 | 2 | 2 | 2 | tier3 | relapse-specific | 0 |

|    |           |           |   |   |     |    |      |     |     |      |      |     |      |   |   |   |       |                  |   |
|----|-----------|-----------|---|---|-----|----|------|-----|-----|------|------|-----|------|---|---|---|-------|------------------|---|
| 2  | 215281284 | 215573039 | C | T | 702 | 10 | 0.01 | 411 | 368 | 0.47 | 698  | 568 | 0.45 | 2 | 2 | 2 | tier2 | shared           | 0 |
| 2  | 215847666 | 216139421 | C | T | 548 | 8  | 0.01 | 340 | 285 | 0.46 | 344  | 264 | 0.43 | 2 | 2 | 2 | tier3 | shared           | 0 |
| 2  | 217491643 | 217783398 | G | T | 542 | 9  | 0.02 | 387 | 307 | 0.44 | 653  | 489 | 0.43 | 2 | 2 | 2 | tier3 | shared           | 1 |
| 2  | 21961328  | 22107823  | C | T | 544 | 9  | 0.02 | 387 | 338 | 0.47 | 919  | 771 | 0.46 | 2 | 2 | 2 | tier3 | shared           | 0 |
| 2  | 219997497 | 220289253 | C | T | 619 | 16 | 0.03 | 328 | 311 | 0.49 | 367  | 333 | 0.48 | 2 | 2 | 2 | tier3 | shared           | 0 |
| 2  | 22214628  | 22361123  | G | A | 708 | 6  | 0.01 | 419 | 269 | 0.39 | 772  | 525 | 0.40 | 2 | 2 | 2 | tier3 | shared           | 1 |
| 2  | 224034377 | 224326133 | G | A | 690 | 10 | 0.01 | 412 | 303 | 0.42 | 522  | 350 | 0.40 | 2 | 2 | 2 | tier3 | shared           | 1 |
| 2  | 229682363 | 229974119 | T | C | 722 | 11 | 0.02 | 472 | 356 | 0.43 | 1161 | 161 | 0.12 | 2 | 2 | 2 | tier2 | shared           | 0 |
| 2  | 233837397 | 234172658 | C | T | 637 | 10 | 0.02 | 366 | 297 | 0.45 | 299  | 198 | 0.40 | 2 | 2 | 2 | tier1 | shared           | 2 |
| 2  | 234415280 | 234750541 | G | A | 675 | 4  | 0.01 | 450 | 331 | 0.42 | 521  | 327 | 0.39 | 2 | 2 | 2 | tier1 | shared           | 2 |
| 2  | 234881052 | 235216313 | T | G | 739 | 1  | 0.00 | 918 | 7   | 0.01 | 742  | 295 | 0.28 | 2 | 2 | 2 | tier3 | relapse-specific | 1 |
| 2  | 235085997 | 235421258 | G | T | 331 | 2  | 0.01 | 267 | 248 | 0.48 | 217  | 152 | 0.41 | 2 | 2 | 2 | tier3 | shared           | 1 |
| 2  | 239854071 | 240189134 | T | A | 686 | 1  | 0.00 | 714 | 12  | 0.02 | 832  | 216 | 0.21 | 2 | 2 | 2 | tier3 | relapse-specific | 1 |
| 2  | 24234854  | 24381350  | G | A | 608 | 11 | 0.02 | 432 | 345 | 0.44 | 325  | 266 | 0.45 | 2 | 2 | 2 | tier3 | shared           | 1 |
| 2  | 2694285   | 2715278   | G | A | 785 | 19 | 0.02 | 465 | 427 | 0.48 | 894  | 661 | 0.43 | 2 | 2 | 2 | tier3 | shared           | 1 |
| 2  | 31964830  | 32111326  | C | T | 685 | 8  | 0.01 | 381 | 317 | 0.45 | 359  | 286 | 0.44 | 2 | 2 | 2 | tier3 | shared           | 0 |
| 2  | 35393942  | 35540438  | G | C | 603 | 4  | 0.01 | 330 | 289 | 0.47 | 596  | 482 | 0.45 | 2 | 2 | 2 | tier3 | shared           | 1 |
| 2  | 35447877  | 35594373  | G | A | 672 | 17 | 0.02 | 412 | 352 | 0.46 | 485  | 334 | 0.41 | 2 | 2 | 2 | tier3 | shared           | 1 |
| 2  | 3907608   | 3929733   | G | A | 751 | 12 | 0.02 | 433 | 377 | 0.47 | 849  | 672 | 0.44 | 2 | 2 | 2 | tier2 | shared           | 1 |
| 2  | 39866687  | 40013183  | A | C | 432 | 5  | 0.01 | 303 | 264 | 0.47 | 472  | 338 | 0.42 | 2 | 2 | 2 | tier3 | shared           | 0 |
| 2  | 41983085  | 42129581  | A | C | 581 | 0  | 0.00 | 699 | 9   | 0.01 | 622  | 259 | 0.29 | 2 | 2 | 2 | tier3 | relapse-specific | 0 |
| 2  | 43412218  | 43558714  | C | G | 846 | 18 | 0.02 | 528 | 439 | 0.45 | 1344 | 909 | 0.40 | 2 | 2 | 2 | tier2 | shared           | 0 |
| 2  | 45349654  | 45496150  | C | G | 380 | 6  | 0.02 | 327 | 245 | 0.43 | 474  | 366 | 0.44 | 2 | 2 | 2 | tier3 | shared           | 0 |
| 2  | 4771422   | 4793547   | C | T | 481 | 7  | 0.01 | 258 | 232 | 0.47 | 473  | 384 | 0.45 | 2 | 2 | 2 | tier3 | shared           | 1 |
| 2  | 4951026   | 4973151   | G | T | 540 | 0  | 0.00 | 650 | 9   | 0.01 | 562  | 203 | 0.27 | 2 | 2 | 2 | tier3 | relapse-specific | 0 |
| 2  | 50855382  | 51001878  | C | T | 786 | 3  | 0.00 | 744 | 145 | 0.16 | 1351 | 1   | 0.00 | 2 | 2 | 2 | tier3 | tumor-specific   | 1 |
| 2  | 51590347  | 51736843  | T | C | 876 | 7  | 0.01 | 544 | 394 | 0.42 | 1399 | 179 | 0.11 | 2 | 2 | 2 | tier3 | shared           | 0 |
| 2  | 52337923  | 52484419  | G | A | 644 | 0  | 0.00 | 783 | 12  | 0.02 | 625  | 269 | 0.30 | 2 | 2 | 2 | tier3 | relapse-specific | 0 |
| 2  | 53366757  | 53513253  | G | A | 632 | 0  | 0.00 | 688 | 6   | 0.01 | 522  | 251 | 0.32 | 2 | 2 | 2 | tier3 | relapse-specific | 1 |
| 2  | 57473570  | 57620066  | T | G | 776 | 6  | 0.01 | 349 | 304 | 0.47 | 495  | 336 | 0.40 | 2 | 2 | 2 | tier3 | shared           | 1 |
| 2  | 59919013  | 60065509  | G | A | 787 | 12 | 0.02 | 555 | 443 | 0.44 | 753  | 581 | 0.44 | 2 | 2 | 2 | tier3 | shared           | 0 |
| 2  | 680769    | 690769    | C | A | 754 | 13 | 0.02 | 495 | 345 | 0.41 | 985  | 128 | 0.12 | 2 | 2 | 2 | tier2 | shared           | 2 |
| 2  | 73389479  | 73535971  | G | A | 492 | 10 | 0.02 | 297 | 260 | 0.47 | 906  | 559 | 0.38 | 2 | 2 | 2 | tier2 | shared           | 0 |
| 2  | 7652223   | 7734772   | A | T | 725 | 15 | 0.02 | 516 | 491 | 0.49 | 658  | 471 | 0.42 | 2 | 2 | 2 | tier3 | shared           | 0 |
| 2  | 77814007  | 77960499  | G | A | 641 | 12 | 0.02 | 376 | 287 | 0.43 | 510  | 330 | 0.39 | 2 | 2 | 2 | tier3 | shared           | 1 |
| 2  | 79379094  | 79525586  | C | T | 601 | 7  | 0.01 | 383 | 318 | 0.45 | 890  | 531 | 0.37 | 2 | 2 | 2 | tier3 | shared           | 0 |
| 2  | 95091162  | 95727435  | C | T | 546 | 13 | 0.02 | 331 | 241 | 0.42 | 906  | 102 | 0.10 | 2 | 2 | 2 | tier3 | shared           | 0 |
| 2  | 95145242  | 95781515  | T | C | 735 | 9  | 0.01 | 560 | 407 | 0.42 | 598  | 71  | 0.11 | 2 | 2 | 2 | tier3 | shared           | 0 |
| 20 | 15271349  | 15323349  | A | G | 542 | 9  | 0.02 | 410 | 330 | 0.45 | 510  | 324 | 0.39 | 2 | 2 | 2 | tier3 | shared           | 0 |
| 20 | 15545992  | 15597992  | G | A | 477 | 13 | 0.03 | 321 | 244 | 0.43 | 529  | 72  | 0.12 | 2 | 2 | 2 | tier2 | shared           | 0 |

|    |           |           |   |   |     |    |      |     |     |      |      |     |      |   |      |      |       |                  |   |
|----|-----------|-----------|---|---|-----|----|------|-----|-----|------|------|-----|------|---|------|------|-------|------------------|---|
| 20 | 17900146  | 17952146  | T | A | 714 | 0  | 0.00 | 836 | 8   | 0.01 | 355  | 159 | 0.31 | 2 | 2    | 2    | tier3 | relapse-specific | 0 |
| 20 | 20853777  | 20905777  | G | C | 566 | 13 | 0.02 | 382 | 364 | 0.49 | 843  | 576 | 0.41 | 2 | 2    | 2    | tier2 | shared           | 1 |
| 20 | 22014823  | 22066823  | A | T | 571 | 7  | 0.01 | 339 | 297 | 0.47 | 431  | 285 | 0.40 | 2 | 2    | 2    | tier3 | shared           | 1 |
| 20 | 2709619   | 2761619   | C | T | 667 | 9  | 0.01 | 389 | 372 | 0.49 | 550  | 420 | 0.43 | 2 | 2    | 2    | tier2 | shared           | 0 |
| 20 | 37620741  | 38187327  | T | A | 405 | 7  | 0.02 | 244 | 241 | 0.50 | 511  | 357 | 0.41 | 2 | 2    | 2    | tier3 | shared           | 1 |
| 20 | 37764465  | 38331051  | G | T | 627 | 6  | 0.01 | 447 | 347 | 0.44 | 1411 | 167 | 0.11 | 2 | 2    | 2    | tier3 | shared           | 1 |
| 20 | 40268312  | 40834898  | A | T | 793 | 12 | 0.01 | 473 | 419 | 0.47 | 1399 | 922 | 0.40 | 2 | 2    | 2    | tier3 | shared           | 3 |
| 20 | 42143829  | 42710415  | C | G | 284 | 4  | 0.01 | 191 | 163 | 0.46 | 319  | 236 | 0.43 | 2 | 2    | 2    | tier3 | shared           | 1 |
| 20 | 49730834  | 50297427  | C | T | 529 | 0  | 0.00 | 690 | 8   | 0.01 | 565  | 250 | 0.31 | 2 | 2    | 2    | tier3 | relapse-specific | 0 |
| 20 | 52026411  | 52593004  | G | A | 561 | 10 | 0.02 | 356 | 311 | 0.47 | 559  | 419 | 0.43 | 2 | 2    | 2    | tier2 | shared           | 0 |
| 20 | 53475223  | 54041816  | G | T | 513 | 5  | 0.01 | 306 | 213 | 0.41 | 296  | 172 | 0.37 | 2 | 2    | 2    | tier3 | shared           | 1 |
| 20 | 61515246  | 62044802  | C | T | 251 | 9  | 0.03 | 132 | 117 | 0.47 | 62   | 9   | 0.13 | 2 | 1.41 | 1.42 | tier1 | shared           | 1 |
| 20 | 7450754   | 7502754   | T | - | 790 | 10 | 0.01 | 559 | 420 | 0.43 | 861  | 505 | 0.37 | 2 | 2    | 2    | tier3 | shared           | 1 |
| 21 | 14058883  | 15137012  | C | T | 341 | 6  | 0.02 | 230 | 182 | 0.44 | 153  | 111 | 0.42 | 2 | 1.19 | 2    | tier1 | shared           | 1 |
| 21 | 21894381  | 22972510  | G | A | 551 | 9  | 0.02 | 375 | 251 | 0.40 | 431  | 303 | 0.41 | 2 | 2    | 2    | tier3 | shared           | 0 |
| 21 | 26930860  | 28008989  | A | G | 328 | 0  | 0.00 | 312 | 1   | 0.00 | 171  | 59  | 0.26 | 2 | 2    | 2    | tier3 | relapse-specific | 1 |
| 21 | 27215461  | 28293590  | C | T | 483 | 1  | 0.00 | 605 | 2   | 0.00 | 318  | 115 | 0.27 | 2 | 2    | 2    | tier3 | relapse-specific | 0 |
| 21 | 30506811  | 31584940  | G | A | 640 | 0  | 0.00 | 795 | 12  | 0.01 | 549  | 248 | 0.31 | 2 | 2    | 2    | tier3 | relapse-specific | 0 |
| 21 | 36612009  | 37690139  | A | - | 835 | 8  | 0.01 | 560 | 434 | 0.44 | 1119 | 136 | 0.11 | 2 | 2    | 2    | tier3 | shared           | 1 |
| 21 | 40928109  | 42006239  | G | C | 576 | 7  | 0.01 | 325 | 281 | 0.46 | 650  | 492 | 0.43 | 2 | 2    | 2    | tier3 | shared           | 1 |
| 21 | 41098119  | 42176249  | G | A | 542 | 7  | 0.01 | 360 | 281 | 0.44 | 826  | 591 | 0.42 | 2 | 2    | 2    | tier3 | shared           | 1 |
| 21 | 43023406  | 44150337  | G | A | 707 | 13 | 0.02 | 442 | 424 | 0.49 | 360  | 246 | 0.41 | 2 | 2    | 2    | tier3 | shared           | 0 |
| 21 | 44100552  | 45276124  | C | T | 296 | 7  | 0.02 | 156 | 157 | 0.50 | 129  | 110 | 0.46 | 2 | 2    | 2    | tier2 | shared           | 0 |
| 21 | 44111210  | 45286782  | G | A | 330 | 11 | 0.03 | 214 | 187 | 0.47 | 162  | 120 | 0.43 | 2 | 2    | 2    | tier3 | shared           | 0 |
| 21 | 44766031  | 45941603  | G | T | 413 | 3  | 0.01 | 305 | 228 | 0.43 | 116  | 70  | 0.38 | 2 | 2    | 2    | tier3 | shared           | 0 |
| 22 | 16635285  | 18255285  | C | T | 448 | 8  | 0.02 | 234 | 211 | 0.47 | 114  | 99  | 0.46 | 2 | 2    | 2    | tier3 | shared           | 0 |
| 22 | 18266604  | 19886604  | C | G | 569 | 0  | 0.00 | 646 | 3   | 0.00 | 257  | 98  | 0.28 | 2 | 2    | 2    | tier3 | relapse-specific | 0 |
| 22 | 24107592  | 25777592  | T | - | 524 | 4  | 0.01 | 317 | 223 | 0.41 | 195  | 107 | 0.35 | 2 | 2    | 2    | tier3 | shared           | 1 |
| 22 | 46314184  | 47935520  | G | T | 637 | 0  | 0.00 | 790 | 4   | 0.01 | 798  | 358 | 0.31 | 2 | 2    | 2    | tier3 | relapse-specific | 1 |
| 22 | 46343957  | 47965293  | G | A | 628 | 10 | 0.02 | 365 | 318 | 0.47 | 1356 | 903 | 0.40 | 2 | 2    | 2    | tier3 | shared           | 1 |
| 3  | 104548908 | 103066218 | G | A | 742 | 13 | 0.02 | 517 | 293 | 0.36 | 897  | 110 | 0.11 | 2 | 2    | 2    | tier3 | shared           | 1 |
| 3  | 108073672 | 106590982 | C | A | 680 | 13 | 0.02 | 407 | 342 | 0.46 | 609  | 431 | 0.41 | 2 | 2    | 2    | tier3 | shared           | 0 |
| 3  | 110361937 | 108879247 | G | A | 730 | 9  | 0.01 | 405 | 311 | 0.43 | 721  | 106 | 0.13 | 2 | 2    | 2    | tier2 | shared           | 0 |
| 3  | 111975407 | 110492717 | C | T | 864 | 12 | 0.01 | 548 | 427 | 0.44 | 1104 | 1   | 0.00 | 2 | 2    | 2    | tier3 | tumor-specific   | 0 |
| 3  | 116601690 | 115119000 | G | A | 781 | 12 | 0.02 | 472 | 382 | 0.45 | 565  | 351 | 0.38 | 2 | 2    | 2    | tier2 | shared           | 1 |
| 3  | 117888511 | 116405821 | C | T | 863 | 16 | 0.02 | 574 | 419 | 0.42 | 786  | 511 | 0.39 | 2 | 2    | 2    | tier3 | shared           | 0 |
| 3  | 118569453 | 117086763 | C | T | 426 | 8  | 0.02 | 258 | 257 | 0.50 | 431  | 302 | 0.41 | 2 | 2    | 2    | tier2 | shared           | 1 |
| 3  | 124283786 | 122801096 | C | T | 529 | 6  | 0.01 | 348 | 269 | 0.44 | 1837 | 5   | 0.00 | 2 | 2    | 2    | tier3 | tumor-specific   | 0 |
| 3  | 128201638 | 126718948 | G | A | 176 | 3  | 0.02 | 142 | 112 | 0.44 | 25   | 19  | 0.43 | 2 | 2    | 2    | tier3 | shared           | 1 |
| 3  | 128213011 | 126730321 | C | T | 427 | 6  | 0.01 | 248 | 207 | 0.45 | 94   | 48  | 0.34 | 2 | 2    | 2    | tier3 | shared           | 1 |

|   |           |           |      |   |      |    |      |      |     |      |      |      |      |   |   |   |       |                  |   |
|---|-----------|-----------|------|---|------|----|------|------|-----|------|------|------|------|---|---|---|-------|------------------|---|
| 3 | 132386205 | 130903515 | A    | G | 583  | 8  | 0.01 | 420  | 317 | 0.43 | 321  | 250  | 0.44 | 2 | 2 | 2 | tier3 | shared           | 0 |
| 3 | 14810375  | 14835371  | A    | G | 350  | 5  | 0.01 | 249  | 208 | 0.46 | 332  | 248  | 0.43 | 2 | 2 | 2 | tier3 | shared           | 0 |
| 3 | 148403134 | 146920444 | G    | A | 674  | 6  | 0.01 | 420  | 325 | 0.44 | 489  | 316  | 0.39 | 2 | 2 | 2 | tier3 | shared           | 1 |
| 3 | 148730059 | 147247369 | C    | G | 659  | 1  | 0.00 | 737  | 11  | 0.01 | 1060 | 406  | 0.28 | 2 | 2 | 2 | tier3 | relapse-specific | 0 |
| 3 | 153189049 | 151706359 | G    | T | 690  | 20 | 0.03 | 441  | 385 | 0.47 | 419  | 302  | 0.42 | 2 | 2 | 2 | tier3 | shared           | 1 |
| 3 | 153463724 | 151981034 | T    | C | 458  | 4  | 0.01 | 297  | 271 | 0.48 | 365  | 275  | 0.43 | 2 | 2 | 2 | tier3 | shared           | 0 |
| 3 | 153491359 | 152008669 | T    | A | 706  | 9  | 0.01 | 513  | 496 | 0.49 | 658  | 508  | 0.44 | 2 | 2 | 2 | tier3 | shared           | 0 |
| 3 | 153678808 | 152196118 | A    | T | 727  | 6  | 0.01 | 410  | 343 | 0.46 | 496  | 362  | 0.42 | 2 | 2 | 2 | tier3 | shared           | 0 |
| 3 | 165792039 | 164309345 | C    | T | 914  | 11 | 0.01 | 511  | 395 | 0.44 | 788  | 512  | 0.39 | 2 | 2 | 2 | tier3 | shared           | 1 |
| 3 | 166025067 | 164542373 | T    | C | 588  | 4  | 0.01 | 582  | 74  | 0.11 | 721  | 0    | 0.00 | 2 | 2 | 2 | tier2 | tumor-specific   | 1 |
| 3 | 168161221 | 166678527 | C    | T | 540  | 12 | 0.02 | 419  | 285 | 0.40 | 468  | 347  | 0.43 | 2 | 2 | 2 | tier2 | shared           | 1 |
| 3 | 168374413 | 166891719 | G    | A | 609  | 6  | 0.01 | 667  | 149 | 0.18 | 615  | 0    | 0.00 | 2 | 2 | 2 | tier3 | tumor-specific   | 1 |
| 3 | 174114325 | 172631631 | G    | A | 479  | 0  | 0.00 | 648  | 5   | 0.01 | 417  | 186  | 0.31 | 2 | 2 | 2 | tier2 | relapse-specific | 0 |
| 3 | 175409328 | 173926634 | G    | A | 826  | 0  | 0.00 | 1075 | 9   | 0.01 | 960  | 370  | 0.28 | 2 | 2 | 2 | tier3 | relapse-specific | 0 |
| 3 | 176132596 | 174649902 | G    | A | 636  | 7  | 0.01 | 315  | 294 | 0.48 | 591  | 392  | 0.40 | 2 | 2 | 2 | tier3 | shared           | 1 |
| 3 | 188452065 | 186969371 | C    | T | 499  | 8  | 0.02 | 335  | 270 | 0.45 | 543  | 64   | 0.11 | 2 | 2 | 2 | tier2 | shared           | 1 |
| 3 | 192957721 | 191475027 | G    | A | 843  | 14 | 0.02 | 500  | 429 | 0.46 | 1218 | 4    | 0.00 | 2 | 2 | 2 | tier2 | tumor-specific   | 1 |
| 3 | 197927554 | 196443157 | C    | G | 685  | 10 | 0.01 | 450  | 352 | 0.44 | 218  | 166  | 0.43 | 2 | 2 | 2 | tier3 | shared           | 0 |
| 3 | 198619945 | 197135548 | C    | T | 498  | 5  | 0.01 | 303  | 246 | 0.45 | 619  | 401  | 0.39 | 2 | 2 | 2 | tier3 | shared           | 1 |
| 3 | 22266290  | 22291286  | T    | G | 590  | 10 | 0.02 | 363  | 290 | 0.44 | 445  | 300  | 0.40 | 2 | 2 | 2 | tier3 | shared           | 1 |
| 3 | 26130020  | 26155016  | G    | A | 765  | 13 | 0.02 | 541  | 483 | 0.47 | 1110 | 868  | 0.44 | 2 | 2 | 2 | tier3 | shared           | 1 |
| 3 | 262560    | 287560    | G    | C | 796  | 7  | 0.01 | 696  | 141 | 0.17 | 1062 | 0    | 0.00 | 2 | 2 | 2 | tier3 | tumor-specific   | 1 |
| 3 | 26421838  | 26446834  | C    | A | 738  | 6  | 0.01 | 762  | 147 | 0.16 | 1083 | 1    | 0.00 | 2 | 2 | 2 | tier2 | tumor-specific   | 1 |
| 3 | 26492879  | 26517875  | G    | A | 561  | 4  | 0.01 | 348  | 270 | 0.44 | 348  | 259  | 0.43 | 2 | 2 | 2 | tier3 | shared           | 1 |
| 3 | 3039744   | 3064744   | G    | T | 744  | 8  | 0.01 | 497  | 378 | 0.43 | 940  | 127  | 0.12 | 2 | 2 | 2 | tier2 | shared           | 0 |
| 3 | 42451811  | 42476807  | T    | A | 591  | 9  | 0.02 | 404  | 333 | 0.45 | 547  | 381  | 0.41 | 2 | 2 | 2 | tier2 | shared           | 1 |
| 3 | 45063478  | 45088474  | G    | A | 533  | 1  | 0.00 | 305  | 277 | 0.48 | 325  | 198  | 0.38 | 2 | 2 | 2 | tier3 | shared           | 0 |
| 3 | 48451865  | 48476861  | G    | T | 507  | 7  | 0.01 | 294  | 260 | 0.47 | 211  | 197  | 0.48 | 2 | 2 | 2 | tier2 | shared           | 0 |
| 3 | 61788317  | 61813277  | TCTA | - | 780  | 7  | 0.01 | 495  | 360 | 0.42 | 935  | 617  | 0.40 | 2 | 2 | 2 | tier3 | shared           | 1 |
| 3 | 6235039   | 6260039   | G    | A | 439  | 11 | 0.02 | 317  | 282 | 0.47 | 447  | 312  | 0.41 | 2 | 2 | 2 | tier3 | shared           | 1 |
| 3 | 63494420  | 63519380  | G    | A | 714  | 9  | 0.01 | 398  | 316 | 0.44 | 870  | 588  | 0.40 | 2 | 2 | 2 | tier3 | shared           | 0 |
| 3 | 64963656  | 64988616  | T    | C | 274  | 8  | 0.03 | 170  | 178 | 0.51 | 415  | 53   | 0.11 | 2 | 2 | 2 | tier3 | shared           | 1 |
| 3 | 65861094  | 65886054  | G    | A | 1045 | 20 | 0.02 | 680  | 505 | 0.43 | 1488 | 1146 | 0.44 | 2 | 2 | 2 | tier3 | shared           | 2 |
| 3 | 74634133  | 74551443  | A    | C | 491  | 5  | 0.01 | 329  | 272 | 0.45 | 444  | 357  | 0.45 | 2 | 2 | 2 | tier3 | shared           | 0 |
| 3 | 76207102  | 76124412  | G    | A | 588  | 4  | 0.01 | 374  | 261 | 0.41 | 406  | 280  | 0.41 | 2 | 2 | 2 | tier3 | shared           | 2 |
| 3 | 77104007  | 77021317  | C    | G | 509  | 9  | 0.02 | 360  | 281 | 0.44 | 360  | 222  | 0.38 | 2 | 2 | 2 | tier3 | shared           | 2 |
| 3 | 77340936  | 77258246  | T    | C | 520  | 10 | 0.02 | 308  | 263 | 0.46 | 360  | 275  | 0.43 | 2 | 2 | 2 | tier3 | shared           | 2 |
| 3 | 79101379  | 79018689  | T    | C | 733  | 12 | 0.02 | 477  | 344 | 0.42 | 954  | 0    | 0.00 | 2 | 2 | 2 | tier3 | tumor-specific   | 0 |
| 3 | 79270545  | 79187855  | A    | G | 339  | 3  | 0.01 | 236  | 197 | 0.45 | 424  | 58   | 0.12 | 2 | 2 | 2 | tier3 | shared           | 0 |
| 3 | 79386961  | 79304271  | G    | A | 841  | 9  | 0.01 | 525  | 448 | 0.46 | 1321 | 896  | 0.40 | 2 | 2 | 2 | tier3 | shared           | 0 |



|   |           |           |   |   |     |    |      |     |     |      |      |     |      |   |   |   |       |                  |   |
|---|-----------|-----------|---|---|-----|----|------|-----|-----|------|------|-----|------|---|---|---|-------|------------------|---|
| 3 | 79742487  | 79659797  | G | A | 423 | 17 | 0.04 | 284 | 255 | 0.47 | 500  | 361 | 0.42 | 2 | 2 | 2 | tier2 | shared           | 0 |
| 3 | 80681007  | 80598317  | A | C | 680 | 16 | 0.02 | 522 | 446 | 0.46 | 714  | 492 | 0.41 | 2 | 2 | 2 | tier3 | shared           | 1 |
| 3 | 81690458  | 81607768  | C | T | 642 | 7  | 0.01 | 382 | 313 | 0.45 | 655  | 405 | 0.38 | 2 | 2 | 2 | tier3 | shared           | 0 |
| 3 | 8239084   | 8264084   | C | - | 568 | 6  | 0.01 | 392 | 283 | 0.42 | 441  | 210 | 0.32 | 2 | 2 | 2 | tier3 | shared           | 1 |
| 3 | 85130818  | 85048128  | G | C | 568 | 6  | 0.01 | 343 | 251 | 0.42 | 392  | 261 | 0.40 | 2 | 2 | 2 | tier2 | shared           | 2 |
| 3 | 86508462  | 86425772  | C | G | 918 | 10 | 0.01 | 604 | 459 | 0.43 | 1472 | 1   | 0.00 | 2 | 2 | 2 | tier3 | tumor-specific   | 0 |
| 3 | 96034176  | 94551486  | G | A | 561 | 10 | 0.02 | 407 | 307 | 0.43 | 545  | 442 | 0.45 | 2 | 2 | 2 | tier3 | shared           | 1 |
| 3 | 96785074  | 95302384  | G | A | 599 | 8  | 0.01 | 389 | 283 | 0.42 | 805  | 2   | 0.00 | 2 | 2 | 2 | tier3 | tumor-specific   | 1 |
| 3 | 96825543  | 95342853  | A | C | 612 | 4  | 0.01 | 395 | 293 | 0.43 | 398  | 300 | 0.43 | 2 | 2 | 2 | tier3 | shared           | 1 |
| 3 | 97423737  | 95941047  | G | A | 693 | 0  | 0.00 | 794 | 8   | 0.01 | 673  | 282 | 0.30 | 2 | 2 | 2 | tier3 | relapse-specific | 1 |
| 4 | 103369618 | 103150595 | G | A | 500 | 1  | 0.00 | 652 | 6   | 0.01 | 651  | 286 | 0.31 | 2 | 2 | 2 | tier3 | relapse-specific | 0 |
| 4 | 105253495 | 105034046 | G | A | 887 | 11 | 0.01 | 499 | 452 | 0.48 | 929  | 675 | 0.42 | 2 | 2 | 2 | tier3 | shared           | 1 |
| 4 | 107761470 | 107542021 | T | G | 783 | 11 | 0.01 | 495 | 388 | 0.44 | 827  | 4   | 0.00 | 2 | 2 | 2 | tier3 | tumor-specific   | 1 |
| 4 | 112311957 | 112092508 | G | A | 837 | 16 | 0.02 | 535 | 497 | 0.48 | 971  | 754 | 0.44 | 2 | 2 | 2 | tier3 | shared           | 1 |
| 4 | 112377379 | 112157930 | G | A | 880 | 9  | 0.01 | 494 | 437 | 0.47 | 677  | 394 | 0.37 | 2 | 2 | 2 | tier3 | shared           | 1 |
| 4 | 114555521 | 114336072 | G | T | 539 | 4  | 0.01 | 406 | 296 | 0.42 | 852  | 588 | 0.41 | 2 | 2 | 2 | tier2 | shared           | 0 |
| 4 | 115824855 | 115605406 | A | G | 690 | 13 | 0.02 | 443 | 336 | 0.43 | 666  | 442 | 0.40 | 2 | 2 | 2 | tier3 | shared           | 0 |
| 4 | 116027622 | 115808173 | G | A | 735 | 5  | 0.01 | 383 | 368 | 0.49 | 859  | 612 | 0.42 | 2 | 2 | 2 | tier3 | shared           | 0 |
| 4 | 117029317 | 116809868 | G | A | 437 | 7  | 0.02 | 257 | 233 | 0.48 | 300  | 206 | 0.41 | 2 | 2 | 2 | tier3 | shared           | 1 |
| 4 | 126378916 | 126159466 | C | T | 825 | 11 | 0.01 | 513 | 426 | 0.45 | 507  | 368 | 0.42 | 2 | 2 | 2 | tier3 | shared           | 1 |
| 4 | 126390388 | 126170938 | C | G | 724 | 7  | 0.01 | 476 | 432 | 0.48 | 571  | 536 | 0.48 | 2 | 2 | 2 | tier2 | shared           | 1 |
| 4 | 12642388  | 13033290  | G | - | 672 | 5  | 0.01 | 424 | 342 | 0.45 | 916  | 641 | 0.41 | 2 | 2 | 2 | tier3 | shared           | 1 |
| 4 | 128107864 | 127888414 | C | T | 709 | 11 | 0.02 | 372 | 364 | 0.49 | 531  | 352 | 0.40 | 2 | 2 | 2 | tier3 | shared           | 1 |
| 4 | 130405903 | 130186453 | T | G | 681 | 21 | 0.03 | 389 | 340 | 0.47 | 1010 | 836 | 0.45 | 2 | 2 | 2 | tier2 | shared           | 1 |
| 4 | 131202373 | 130982923 | G | A | 801 | 19 | 0.02 | 439 | 369 | 0.46 | 452  | 304 | 0.40 | 2 | 2 | 2 | tier3 | shared           | 1 |
| 4 | 132134033 | 131914583 | T | A | 341 | 0  | 0.00 | 410 | 3   | 0.01 | 171  | 62  | 0.27 | 2 | 2 | 2 | tier2 | relapse-specific | 1 |
| 4 | 132401736 | 132182286 | G | A | 436 | 1  | 0.00 | 611 | 5   | 0.01 | 340  | 113 | 0.25 | 2 | 2 | 2 | tier3 | relapse-specific | 0 |
| 4 | 133674094 | 133454644 | A | C | 717 | 0  | 0.00 | 695 | 11  | 0.02 | 579  | 215 | 0.27 | 2 | 2 | 2 | tier3 | relapse-specific | 1 |
| 4 | 134412099 | 134192649 | G | A | 404 | 7  | 0.02 | 251 | 216 | 0.46 | 574  | 403 | 0.41 | 2 | 2 | 2 | tier2 | shared           | 1 |
| 4 | 134645746 | 134426296 | G | A | 638 | 5  | 0.01 | 449 | 337 | 0.43 | 784  | 528 | 0.40 | 2 | 2 | 2 | tier3 | shared           | 1 |
| 4 | 137282440 | 137062990 | G | A | 324 | 0  | 0.00 | 234 | 101 | 0.30 | 247  | 29  | 0.11 | 2 | 2 | 2 | tier3 | shared           | 1 |
| 4 | 154497736 | 154278286 | A | T | 566 | 1  | 0.00 | 281 | 222 | 0.44 | 397  | 246 | 0.38 | 2 | 2 | 2 | tier3 | shared           | 0 |
| 4 | 156877020 | 156657570 | C | T | 579 | 7  | 0.01 | 454 | 378 | 0.45 | 610  | 447 | 0.42 | 2 | 2 | 2 | tier3 | shared           | 2 |
| 4 | 167831999 | 167595424 | A | G | 763 | 7  | 0.01 | 461 | 378 | 0.45 | 1028 | 2   | 0.00 | 2 | 2 | 2 | tier2 | tumor-specific   | 1 |
| 4 | 177146700 | 176909706 | C | A | 699 | 8  | 0.01 | 468 | 367 | 0.44 | 1396 | 166 | 0.11 | 2 | 2 | 2 | tier3 | shared           | 1 |
| 4 | 17783989  | 18174891  | C | T | 467 | 0  | 0.00 | 544 | 5   | 0.01 | 413  | 142 | 0.26 | 2 | 2 | 2 | tier2 | relapse-specific | 1 |
| 4 | 182792991 | 182555997 | A | C | 456 | 4  | 0.01 | 311 | 245 | 0.44 | 472  | 323 | 0.41 | 2 | 2 | 2 | tier3 | shared           | 1 |
| 4 | 184474803 | 184237809 | G | A | 331 | 3  | 0.01 | 246 | 217 | 0.47 | 471  | 318 | 0.40 | 2 | 2 | 2 | tier2 | shared           | 0 |
| 4 | 187184304 | 186947310 | A | G | 657 | 13 | 0.02 | 385 | 338 | 0.47 | 531  | 379 | 0.42 | 2 | 2 | 2 | tier2 | shared           | 0 |
| 4 | 187238379 | 187001385 | C | A | 274 | 10 | 0.04 | 190 | 131 | 0.41 | 87   | 62  | 0.42 | 2 | 2 | 2 | tier3 | shared           | 0 |

|   |           |           |   |   |     |    |      |      |     |      |      |     |      |   |   |      |       |                  |   |
|---|-----------|-----------|---|---|-----|----|------|------|-----|------|------|-----|------|---|---|------|-------|------------------|---|
| 4 | 1877350   | 1907552   | C | T | 375 | 8  | 0.02 | 293  | 230 | 0.44 | 437  | 322 | 0.42 | 2 | 2 | 2    | tier2 | shared           | 0 |
| 4 | 188332814 | 188095820 | C | T | 687 | 6  | 0.01 | 521  | 391 | 0.43 | 633  | 394 | 0.38 | 2 | 2 | 2    | tier3 | shared           | 1 |
| 4 | 188720336 | 188483342 | G | A | 809 | 10 | 0.01 | 544  | 406 | 0.43 | 800  | 535 | 0.40 | 2 | 2 | 2    | tier3 | shared           | 1 |
| 4 | 18912208  | 19303110  | G | T | 848 | 0  | 0.00 | 1013 | 1   | 0.00 | 1640 | 294 | 0.15 | 2 | 2 | 2    | tier3 | relapse-specific | 1 |
| 4 | 20642343  | 21033245  | C | T | 655 | 7  | 0.01 | 428  | 369 | 0.46 | 510  | 343 | 0.40 | 2 | 2 | 2    | tier2 | shared           | 0 |
| 4 | 22759171  | 23150073  | G | A | 550 | 0  | 0.00 | 656  | 2   | 0.00 | 834  | 336 | 0.29 | 2 | 2 | 2    | tier3 | relapse-specific | 1 |
| 4 | 23099928  | 23490830  | G | A | 721 | 12 | 0.02 | 383  | 327 | 0.46 | 410  | 306 | 0.43 | 2 | 2 | 2    | tier3 | shared           | 1 |
| 4 | 23343723  | 23734625  | C | T | 564 | 11 | 0.02 | 295  | 253 | 0.46 | 1203 | 930 | 0.44 | 2 | 2 | 2    | tier2 | shared           | 1 |
| 4 | 23465614  | 23856516  | T | C | 439 | 11 | 0.02 | 237  | 181 | 0.43 | 295  | 197 | 0.40 | 2 | 2 | 2    | tier3 | shared           | 0 |
| 4 | 24719341  | 25110243  | C | T | 548 | 9  | 0.02 | 382  | 317 | 0.45 | 1095 | 171 | 0.14 | 2 | 2 | 2    | tier3 | shared           | 0 |
| 4 | 25787928  | 26178830  | C | A | 988 | 15 | 0.01 | 507  | 429 | 0.46 | 838  | 609 | 0.42 | 2 | 2 | 2    | tier3 | shared           | 0 |
| 4 | 29251450  | 29642352  | C | A | 896 | 12 | 0.01 | 554  | 452 | 0.45 | 831  | 108 | 0.12 | 2 | 2 | 2    | tier3 | shared           | 1 |
| 4 | 29705492  | 30096394  | C | T | 423 | 5  | 0.01 | 331  | 234 | 0.41 | 666  | 75  | 0.10 | 2 | 2 | 2    | tier3 | shared           | 1 |
| 4 | 29990099  | 30381001  | C | T | 532 | 6  | 0.01 | 271  | 194 | 0.42 | 413  | 244 | 0.37 | 2 | 2 | 2    | tier3 | shared           | 1 |
| 4 | 30058524  | 30449426  | A | T | 430 | 11 | 0.02 | 294  | 253 | 0.46 | 417  | 326 | 0.44 | 2 | 2 | 2    | tier3 | shared           | 1 |
| 4 | 31370390  | 31761292  | A | C | 362 | 2  | 0.01 | 276  | 257 | 0.48 | 436  | 306 | 0.41 | 2 | 2 | 2    | tier2 | shared           | 1 |
| 4 | 31779477  | 32135579  | G | C | 527 | 0  | 0.00 | 634  | 1   | 0.00 | 513  | 228 | 0.31 | 2 | 2 | 2    | tier3 | relapse-specific | 0 |
| 4 | 32281806  | 32637908  | G | C | 587 | 13 | 0.02 | 369  | 297 | 0.45 | 992  | 112 | 0.10 | 2 | 2 | 2    | tier3 | shared           | 1 |
| 4 | 33004111  | 33327716  | A | G | 652 | 6  | 0.01 | 374  | 308 | 0.45 | 612  | 497 | 0.45 | 2 | 2 | 2    | tier3 | shared           | 1 |
| 4 | 34925832  | 35249437  | T | A | 550 | 3  | 0.01 | 355  | 229 | 0.39 | 486  | 302 | 0.38 | 2 | 2 | 2    | tier3 | shared           | 1 |
| 4 | 58848996  | 59154239  | G | A | 790 | 15 | 0.02 | 504  | 363 | 0.42 | 363  | 211 | 0.37 | 2 | 2 | 2    | tier3 | shared           | 1 |
| 4 | 59326070  | 59631313  | G | T | 914 | 17 | 0.02 | 537  | 402 | 0.43 | 656  | 470 | 0.42 | 2 | 2 | 2    | tier3 | shared           | 1 |
| 4 | 59788820  | 60106225  | C | T | 449 | 2  | 0.00 | 293  | 202 | 0.41 | 414  | 296 | 0.42 | 2 | 2 | 2    | tier3 | shared           | 1 |
| 4 | 61451246  | 61768651  | G | T | 865 | 16 | 0.02 | 492  | 421 | 0.46 | 1142 | 136 | 0.11 | 2 | 2 | 2    | tier3 | shared           | 1 |
| 4 | 61457317  | 61774722  | C | T | 877 | 20 | 0.02 | 441  | 362 | 0.45 | 1000 | 3   | 0.00 | 2 | 2 | 2    | tier3 | tumor-specific   | 1 |
| 4 | 65237776  | 65555181  | A | G | 720 | 10 | 0.01 | 422  | 321 | 0.43 | 782  | 0   | 0.00 | 2 | 2 | 2    | tier3 | tumor-specific   | 1 |
| 4 | 66830014  | 67147419  | C | G | 421 | 7  | 0.02 | 348  | 266 | 0.43 | 380  | 237 | 0.38 | 2 | 2 | 2    | tier3 | shared           | 0 |
| 4 | 70035031  | 70000442  | C | T | 417 | 3  | 0.01 | 257  | 214 | 0.45 | 376  | 312 | 0.45 | 2 | 2 | 2    | tier3 | shared           | 0 |
| 4 | 71031857  | 70997268  | T | C | 616 | 6  | 0.01 | 347  | 313 | 0.47 | 362  | 308 | 0.46 | 2 | 2 | 2    | tier3 | shared           | 0 |
| 4 | 76113412  | 75894388  | C | A | 517 | 8  | 0.02 | 320  | 261 | 0.45 | 744  | 538 | 0.42 | 2 | 2 | 2    | tier3 | shared           | 0 |
| 4 | 86249628  | 86030604  | A | C | 228 | 3  | 0.01 | 173  | 128 | 0.43 | 227  | 124 | 0.35 | 2 | 2 | 2    | tier3 | shared           | 0 |
| 4 | 92575664  | 92356641  | T | C | 616 | 2  | 0.00 | 402  | 306 | 0.43 | 758  | 102 | 0.12 | 2 | 2 | 2    | tier3 | shared           | 1 |
| 4 | 99611966  | 99392943  | T | G | 738 | 9  | 0.01 | 459  | 413 | 0.47 | 515  | 351 | 0.41 | 2 | 2 | 2    | tier3 | shared           | 0 |
| 5 | 101210016 | 101182117 | A | T | 718 | 11 | 0.02 | 478  | 368 | 0.43 | 1709 | 241 | 0.12 | 2 | 2 | 2    | tier3 | shared           | 1 |
| 5 | 104600196 | 104572297 | C | T | 522 | 8  | 0.02 | 297  | 264 | 0.47 | 288  | 209 | 0.42 | 2 | 2 | 2    | tier2 | shared           | 1 |
| 5 | 106172064 | 106144165 | C | T | 839 | 13 | 0.02 | 494  | 393 | 0.44 | 749  | 566 | 0.43 | 2 | 2 | 2    | tier3 | shared           | 1 |
| 5 | 106766017 | 106738118 | G | A | 786 | 15 | 0.02 | 468  | 412 | 0.47 | 1097 | 720 | 0.40 | 2 | 2 | 2    | tier3 | shared           | 0 |
| 5 | 111269099 | 111241200 | T | G | 736 | 12 | 0.02 | 447  | 378 | 0.46 | 915  | 657 | 0.42 | 2 | 2 | 2    | tier3 | shared           | 1 |
| 5 | 118953335 | 118925436 | T | C | 728 | 5  | 0.01 | 467  | 353 | 0.43 | 665  | 530 | 0.44 | 2 | 2 | 2    | tier3 | shared           | 0 |
| 5 | 1190263   | 1137263   | T | A | 347 | 5  | 0.01 | 217  | 166 | 0.43 | 137  | 104 | 0.43 | 2 | 2 | 1.45 | tier3 | shared           | 0 |

|   |           |           |   |   |      |    |      |     |     |      |      |     |      |   |   |   |       |                  |   |
|---|-----------|-----------|---|---|------|----|------|-----|-----|------|------|-----|------|---|---|---|-------|------------------|---|
| 5 | 120450322 | 120422423 | T | C | 679  | 6  | 0.01 | 404 | 326 | 0.45 | 480  | 324 | 0.40 | 2 | 2 | 2 | tier3 | shared           | 1 |
| 5 | 120894390 | 120866491 | A | T | 663  | 15 | 0.02 | 459 | 393 | 0.46 | 664  | 502 | 0.43 | 2 | 2 | 2 | tier2 | shared           | 0 |
| 5 | 12123636  | 12070636  | A | G | 820  | 15 | 0.02 | 433 | 396 | 0.48 | 937  | 662 | 0.41 | 2 | 2 | 2 | tier3 | shared           | 1 |
| 5 | 121905027 | 121877128 | C | T | 728  | 3  | 0.00 | 426 | 333 | 0.44 | 629  | 417 | 0.40 | 2 | 2 | 2 | tier3 | shared           | 1 |
| 5 | 127725400 | 127697501 | G | A | 1154 | 9  | 0.01 | 640 | 498 | 0.44 | 2824 | 11  | 0.00 | 2 | 2 | 2 | tier1 | tumor-specific   | 1 |
| 5 | 127832888 | 127804989 | G | T | 260  | 2  | 0.01 | 257 | 205 | 0.44 | 460  | 63  | 0.12 | 2 | 2 | 2 | tier3 | shared           | 1 |
| 5 | 128418437 | 128390538 | A | G | 610  | 7  | 0.01 | 345 | 258 | 0.43 | 889  | 123 | 0.12 | 2 | 2 | 2 | tier3 | shared           | 0 |
| 5 | 133383451 | 133355552 | G | A | 676  | 2  | 0.00 | 463 | 345 | 0.43 | 1101 | 140 | 0.11 | 2 | 2 | 2 | tier3 | shared           | 1 |
| 5 | 140243210 | 140263026 | G | A | 758  | 11 | 0.01 | 446 | 379 | 0.46 | 799  | 103 | 0.11 | 2 | 2 | 2 | tier1 | shared           | 1 |
| 5 | 140846278 | 140866094 | C | G | 930  | 15 | 0.02 | 540 | 360 | 0.40 | 1803 | 226 | 0.11 | 2 | 2 | 2 | tier1 | shared           | 1 |
| 5 | 147406379 | 147426186 | C | G | 717  | 10 | 0.01 | 488 | 375 | 0.43 | 710  | 469 | 0.40 | 2 | 2 | 2 | tier3 | shared           | 0 |
| 5 | 149649049 | 149668856 | G | T | 465  | 11 | 0.02 | 369 | 299 | 0.45 | 500  | 79  | 0.14 | 2 | 2 | 2 | tier3 | shared           | 0 |
| 5 | 152422952 | 152442759 | C | T | 509  | 14 | 0.03 | 330 | 322 | 0.49 | 523  | 365 | 0.41 | 2 | 2 | 2 | tier2 | shared           | 1 |
| 5 | 154221315 | 154241122 | T | C | 406  | 0  | 0.00 | 566 | 6   | 0.01 | 431  | 155 | 0.26 | 2 | 2 | 2 | tier3 | relapse-specific | 0 |
| 5 | 154835142 | 154854949 | A | G | 701  | 0  | 0.00 | 802 | 10  | 0.01 | 996  | 471 | 0.32 | 2 | 2 | 2 | tier3 | relapse-specific | 1 |
| 5 | 155690400 | 155757822 | G | A | 686  | 5  | 0.01 | 428 | 373 | 0.47 | 1283 | 922 | 0.42 | 2 | 2 | 2 | tier3 | shared           | 0 |
| 5 | 157859403 | 157926825 | G | A | 844  | 11 | 0.01 | 516 | 420 | 0.45 | 885  | 118 | 0.12 | 2 | 2 | 2 | tier2 | shared           | 1 |
| 5 | 165198112 | 165265534 | G | A | 331  | 3  | 0.01 | 210 | 213 | 0.50 | 340  | 222 | 0.40 | 2 | 2 | 2 | tier3 | shared           | 1 |
| 5 | 176872959 | 176940353 | C | T | 675  | 3  | 0.00 | 556 | 149 | 0.21 | 342  | 0   | 0.00 | 2 | 2 | 2 | tier1 | tumor-specific   | 2 |
| 5 | 19051007  | 19015250  | G | T | 792  | 15 | 0.02 | 530 | 407 | 0.43 | 483  | 282 | 0.37 | 2 | 2 | 2 | tier3 | shared           | 1 |
| 5 | 23381427  | 23345670  | T | C | 728  | 5  | 0.01 | 493 | 377 | 0.43 | 1052 | 142 | 0.12 | 2 | 2 | 2 | tier2 | shared           | 2 |
| 5 | 2494675   | 2441675   | G | A | 702  | 15 | 0.02 | 459 | 369 | 0.45 | 658  | 88  | 0.12 | 2 | 2 | 2 | tier3 | shared           | 1 |
| 5 | 26672053  | 26636296  | C | T | 546  | 10 | 0.02 | 326 | 297 | 0.48 | 413  | 295 | 0.42 | 2 | 2 | 2 | tier3 | shared           | 1 |
| 5 | 27542961  | 27507204  | C | T | 254  | 0  | 0.00 | 261 | 1   | 0.00 | 110  | 39  | 0.26 | 2 | 2 | 2 | tier3 | relapse-specific | 1 |
| 5 | 39916942  | 39881185  | C | T | 549  | 4  | 0.01 | 400 | 314 | 0.44 | 787  | 556 | 0.41 | 2 | 2 | 2 | tier2 | shared           | 0 |
| 5 | 43169431  | 43133674  | A | T | 845  | 10 | 0.01 | 632 | 450 | 0.42 | 473  | 322 | 0.41 | 2 | 2 | 2 | tier3 | shared           | 0 |
| 5 | 45672335  | 45636578  | C | T | 918  | 8  | 0.01 | 509 | 434 | 0.46 | 1073 | 714 | 0.40 | 2 | 2 | 2 | tier3 | shared           | 1 |
| 5 | 4717258   | 4664258   | G | A | 722  | 11 | 0.02 | 498 | 376 | 0.43 | 1186 | 168 | 0.12 | 2 | 2 | 2 | tier3 | shared           | 1 |
| 5 | 5067699   | 5014699   | G | A | 872  | 10 | 0.01 | 545 | 467 | 0.46 | 433  | 379 | 0.47 | 2 | 2 | 2 | tier3 | shared           | 0 |
| 5 | 51522290  | 51486533  | A | T | 584  | 5  | 0.01 | 317 | 248 | 0.44 | 421  | 269 | 0.39 | 2 | 2 | 2 | tier3 | shared           | 1 |
| 5 | 52867999  | 52832242  | C | T | 804  | 7  | 0.01 | 540 | 468 | 0.46 | 1039 | 864 | 0.45 | 2 | 2 | 2 | tier3 | shared           | 0 |
| 5 | 65807411  | 65771655  | A | G | 737  | 11 | 0.01 | 486 | 373 | 0.43 | 855  | 630 | 0.42 | 2 | 2 | 2 | tier3 | shared           | 0 |
| 5 | 6918384   | 6865384   | T | A | 676  | 8  | 0.01 | 410 | 362 | 0.47 | 625  | 440 | 0.41 | 2 | 2 | 2 | tier3 | shared           | 0 |
| 5 | 73528567  | 73492811  | T | G | 679  | 8  | 0.01 | 517 | 435 | 0.46 | 836  | 609 | 0.42 | 2 | 2 | 2 | tier3 | shared           | 0 |
| 5 | 73771482  | 73735726  | T | C | 726  | 0  | 0.00 | 925 | 10  | 0.01 | 1477 | 610 | 0.29 | 2 | 2 | 2 | tier2 | relapse-specific | 1 |
| 5 | 74136616  | 74100860  | C | T | 933  | 8  | 0.01 | 608 | 480 | 0.44 | 1270 | 0   | 0.00 | 2 | 2 | 2 | tier3 | tumor-specific   | 0 |
| 5 | 77267867  | 77232111  | A | G | 907  | 16 | 0.02 | 541 | 450 | 0.45 | 894  | 580 | 0.39 | 2 | 2 | 2 | tier2 | shared           | 0 |
| 5 | 7851544   | 7798544   | C | A | 425  | 8  | 0.02 | 321 | 260 | 0.45 | 486  | 342 | 0.41 | 2 | 2 | 2 | tier3 | shared           | 1 |
| 5 | 7904871   | 7851871   | C | T | 753  | 7  | 0.01 | 423 | 391 | 0.48 | 253  | 217 | 0.46 | 2 | 2 | 2 | tier3 | shared           | 0 |
| 5 | 8283992   | 8230992   | A | - | 549  | 10 | 0.02 | 345 | 287 | 0.45 | 443  | 348 | 0.44 | 2 | 2 | 2 | tier2 | shared           | 1 |

|   |           |           |   |   |     |    |      |     |     |      |      |      |      |   |   |   |       |                  |   |
|---|-----------|-----------|---|---|-----|----|------|-----|-----|------|------|------|------|---|---|---|-------|------------------|---|
| 5 | 83283802  | 83248046  | C | T | 549 | 14 | 0.02 | 441 | 395 | 0.47 | 735  | 470  | 0.39 | 2 | 2 | 2 | tier3 | shared           | 1 |
| 5 | 8621917   | 8568917   | A | T | 469 | 4  | 0.01 | 264 | 226 | 0.46 | 402  | 238  | 0.37 | 2 | 2 | 2 | tier3 | shared           | 0 |
| 5 | 87095961  | 87060205  | G | C | 662 | 8  | 0.01 | 431 | 379 | 0.47 | 633  | 435  | 0.41 | 2 | 2 | 2 | tier3 | shared           | 1 |
| 5 | 90039982  | 90004226  | G | T | 419 | 1  | 0.00 | 290 | 216 | 0.43 | 445  | 370  | 0.45 | 2 | 2 | 2 | tier3 | shared           | 2 |
| 5 | 90067397  | 90031641  | G | C | 226 | 4  | 0.02 | 197 | 170 | 0.46 | 316  | 233  | 0.42 | 2 | 2 | 2 | tier2 | shared           | 2 |
| 5 | 93059323  | 93033567  | G | A | 426 | 2  | 0.00 | 222 | 153 | 0.41 | 219  | 31   | 0.12 | 2 | 2 | 2 | tier3 | shared           | 0 |
| 5 | 95272060  | 95246304  | T | C | 450 | 1  | 0.00 | 635 | 6   | 0.01 | 503  | 173  | 0.26 | 2 | 2 | 2 | tier3 | relapse-specific | 0 |
| 5 | 95502445  | 95476689  | A | G | 789 | 18 | 0.02 | 528 | 488 | 0.48 | 697  | 507  | 0.42 | 2 | 2 | 2 | tier3 | shared           | 0 |
| 5 | 97334538  | 97308782  | C | A | 652 | 9  | 0.01 | 368 | 266 | 0.42 | 355  | 182  | 0.34 | 2 | 2 | 2 | tier3 | shared           | 1 |
| 5 | 98396322  | 98368422  | T | C | 506 | 11 | 0.02 | 426 | 357 | 0.46 | 1186 | 761  | 0.39 | 2 | 2 | 2 | tier3 | shared           | 1 |
| 6 | 103079820 | 102973127 | G | A | 494 | 1  | 0.00 | 683 | 3   | 0.00 | 369  | 144  | 0.28 | 2 | 2 | 2 | tier3 | relapse-specific | 0 |
| 6 | 104504284 | 104397591 | A | C | 770 | 1  | 0.00 | 905 | 9   | 0.01 | 1598 | 689  | 0.30 | 2 | 2 | 2 | tier3 | relapse-specific | 1 |
| 6 | 10480723  | 10372737  | C | T | 390 | 7  | 0.02 | 233 | 228 | 0.49 | 262  | 206  | 0.44 | 2 | 2 | 2 | tier3 | shared           | 0 |
| 6 | 11556067  | 11448081  | A | G | 537 | 0  | 0.00 | 637 | 4   | 0.01 | 546  | 188  | 0.26 | 2 | 2 | 2 | tier3 | relapse-specific | 0 |
| 6 | 117095855 | 116989162 | C | T | 465 | 3  | 0.01 | 301 | 293 | 0.49 | 205  | 141  | 0.41 | 2 | 2 | 2 | tier3 | shared           | 0 |
| 6 | 118632756 | 118526063 | G | A | 875 | 3  | 0.00 | 735 | 160 | 0.18 | 1341 | 1    | 0.00 | 2 | 2 | 2 | tier3 | tumor-specific   | 0 |
| 6 | 120261348 | 120219649 | A | G | 894 | 18 | 0.02 | 546 | 390 | 0.42 | 1573 | 5    | 0.00 | 2 | 2 | 2 | tier3 | tumor-specific   | 1 |
| 6 | 125783681 | 125741982 | C | T | 693 | 14 | 0.02 | 413 | 347 | 0.46 | 890  | 709  | 0.44 | 2 | 2 | 2 | tier3 | shared           | 1 |
| 6 | 12712962  | 12604976  | G | A | 545 | 7  | 0.01 | 352 | 271 | 0.43 | 515  | 345  | 0.40 | 2 | 2 | 2 | tier3 | shared           | 0 |
| 6 | 129212144 | 129170451 | T | C | 610 | 15 | 0.02 | 384 | 357 | 0.48 | 740  | 554  | 0.43 | 2 | 2 | 2 | tier3 | shared           | 1 |
| 6 | 131347700 | 131306007 | T | G | 638 | 8  | 0.01 | 293 | 333 | 0.53 | 696  | 568  | 0.45 | 2 | 2 | 2 | tier3 | shared           | 0 |
| 6 | 1343264   | 1398265   | T | C | 599 | 10 | 0.02 | 340 | 310 | 0.48 | 268  | 38   | 0.12 | 2 | 2 | 2 | tier3 | shared           | 0 |
| 6 | 13811863  | 13703884  | A | C | 895 | 9  | 0.01 | 554 | 433 | 0.44 | 602  | 476  | 0.44 | 2 | 2 | 2 | tier3 | shared           | 0 |
| 6 | 140005900 | 139964207 | G | A | 783 | 9  | 0.01 | 509 | 351 | 0.41 | 1353 | 3    | 0.00 | 2 | 2 | 2 | tier3 | tumor-specific   | 0 |
| 6 | 141372185 | 141330492 | A | G | 811 | 7  | 0.01 | 478 | 332 | 0.41 | 766  | 116  | 0.13 | 2 | 2 | 2 | tier2 | shared           | 1 |
| 6 | 149337323 | 149295630 | G | A | 717 | 7  | 0.01 | 435 | 318 | 0.42 | 809  | 618  | 0.43 | 2 | 2 | 2 | tier3 | shared           | 0 |
| 6 | 15097734  | 14989755  | G | A | 771 | 11 | 0.01 | 477 | 412 | 0.46 | 745  | 523  | 0.41 | 2 | 2 | 2 | tier3 | shared           | 0 |
| 6 | 159108034 | 159188046 | T | C | 597 | 12 | 0.02 | 315 | 292 | 0.48 | 511  | 438  | 0.46 | 2 | 2 | 2 | tier1 | shared           | 1 |
| 6 | 160376110 | 160456120 | C | T | 848 | 16 | 0.02 | 501 | 371 | 0.43 | 877  | 127  | 0.13 | 2 | 2 | 2 | tier3 | shared           | 0 |
| 6 | 165990044 | 166070054 | G | A | 548 | 6  | 0.01 | 340 | 284 | 0.46 | 343  | 272  | 0.44 | 2 | 2 | 2 | tier3 | shared           | 0 |
| 6 | 19459891  | 19351912  | G | A | 424 | 10 | 0.02 | 288 | 241 | 0.46 | 490  | 322  | 0.40 | 2 | 2 | 2 | tier3 | shared           | 0 |
| 6 | 20771810  | 20663831  | G | A | 660 | 6  | 0.01 | 455 | 353 | 0.44 | 1333 | 1031 | 0.44 | 2 | 2 | 2 | tier3 | shared           | 0 |
| 6 | 3174084   | 3229085   | A | - | 384 | 1  | 0.00 | 238 | 155 | 0.39 | 112  | 71   | 0.39 | 2 | 2 | 2 | tier2 | shared           | 0 |
| 6 | 31834161  | 31726182  | G | A | 361 | 8  | 0.02 | 334 | 287 | 0.46 | 262  | 177  | 0.40 | 2 | 2 | 2 | tier3 | shared           | 0 |
| 6 | 44096637  | 43988659  | A | G | 342 | 4  | 0.01 | 284 | 233 | 0.45 | 459  | 277  | 0.38 | 2 | 2 | 2 | tier3 | shared           | 0 |
| 6 | 476579    | 531579    | A | G | 595 | 12 | 0.02 | 438 | 295 | 0.40 | 572  | 58   | 0.09 | 2 | 2 | 2 | tier3 | shared           | 1 |
| 6 | 492728    | 547728    | C | T | 641 | 7  | 0.01 | 348 | 296 | 0.46 | 503  | 417  | 0.45 | 2 | 2 | 2 | tier3 | shared           | 1 |
| 6 | 54282157  | 54174198  | A | T | 658 | 11 | 0.02 | 440 | 339 | 0.44 | 1833 | 1247 | 0.40 | 2 | 2 | 2 | tier3 | shared           | 0 |
| 6 | 54919658  | 54811699  | T | - | 650 | 4  | 0.01 | 424 | 361 | 0.46 | 523  | 342  | 0.40 | 2 | 2 | 2 | tier3 | shared           | 0 |
| 6 | 55539300  | 55431341  | C | T | 676 | 0  | 0.00 | 781 | 7   | 0.01 | 453  | 196  | 0.30 | 2 | 2 | 2 | tier3 | relapse-specific | 0 |

|   |           |           |     |   |     |    |      |     |     |      |      |     |      |   |      |      |       |                  |   |
|---|-----------|-----------|-----|---|-----|----|------|-----|-----|------|------|-----|------|---|------|------|-------|------------------|---|
| 6 | 57841439  | 57733480  | C   | T | 622 | 6  | 0.01 | 382 | 340 | 0.47 | 857  | 636 | 0.43 | 2 | 1.43 | 2    | tier3 | shared           | 0 |
| 6 | 58021696  | 57913737  | G   | T | 356 | 4  | 0.01 | 289 | 202 | 0.41 | 219  | 151 | 0.41 | 2 | 1.43 | 2    | tier3 | shared           | 1 |
| 6 | 58720816  | 58612857  | AGA | - | 491 | 3  | 0.01 | 473 | 142 | 0.23 | 709  | 173 | 0.20 | 2 | 2    | 2    | tier3 | shared           | 1 |
| 6 | 70346833  | 70290112  | C   | A | 502 | 4  | 0.01 | 269 | 201 | 0.43 | 336  | 236 | 0.41 | 2 | 2    | 2    | tier3 | shared           | 1 |
| 6 | 70717771  | 70661050  | A   | G | 496 | 9  | 0.02 | 314 | 280 | 0.47 | 203  | 161 | 0.44 | 2 | 2    | 2    | tier3 | shared           | 1 |
| 6 | 8223953   | 8278954   | A   | T | 560 | 10 | 0.02 | 340 | 298 | 0.47 | 954  | 670 | 0.41 | 2 | 2    | 2    | tier3 | shared           | 1 |
| 6 | 85368291  | 85311572  | C   | T | 544 | 8  | 0.01 | 318 | 239 | 0.43 | 359  | 196 | 0.35 | 2 | 2    | 2    | tier3 | shared           | 1 |
| 6 | 87301445  | 87244726  | G   | A | 622 | 2  | 0.00 | 416 | 331 | 0.44 | 921  | 2   | 0.00 | 2 | 2    | 2    | tier3 | tumor-specific   | 1 |
| 6 | 87483810  | 87427091  | T   | A | 456 | 7  | 0.02 | 355 | 285 | 0.45 | 709  | 486 | 0.41 | 2 | 2    | 2    | tier3 | shared           | 0 |
| 6 | 89788729  | 89732010  | A   | - | 718 | 4  | 0.01 | 426 | 1   | 0.00 | 871  | 582 | 0.40 | 2 | 2    | 2    | tier3 | relapse-specific | 0 |
| 6 | 93048600  | 92991879  | T   | G | 440 | 4  | 0.01 | 324 | 226 | 0.41 | 497  | 65  | 0.12 | 2 | 2    | 2    | tier3 | shared           | 1 |
| 6 | 93341535  | 93284814  | G   | A | 494 | 9  | 0.02 | 335 | 308 | 0.48 | 481  | 282 | 0.37 | 2 | 2    | 2    | tier3 | shared           | 1 |
| 6 | 93615117  | 93558396  | C   | T | 777 | 12 | 0.02 | 454 | 396 | 0.47 | 695  | 460 | 0.40 | 2 | 2    | 2    | tier3 | shared           | 0 |
| 6 | 94679810  | 94623089  | C   | T | 743 | 0  | 0.00 | 927 | 7   | 0.01 | 887  | 362 | 0.29 | 2 | 2    | 2    | tier3 | relapse-specific | 1 |
| 6 | 94702338  | 94645617  | T   | A | 519 | 9  | 0.02 | 355 | 287 | 0.45 | 405  | 317 | 0.44 | 2 | 2    | 2    | tier3 | shared           | 1 |
| 6 | 94982255  | 94925534  | C   | T | 619 | 14 | 0.02 | 465 | 361 | 0.44 | 966  | 122 | 0.11 | 2 | 2    | 2    | tier3 | shared           | 1 |
| 6 | 98935123  | 98828402  | A   | G | 711 | 0  | 0.00 | 752 | 7   | 0.01 | 683  | 293 | 0.30 | 2 | 2    | 2    | tier3 | relapse-specific | 1 |
| 7 | 101384020 | 101597300 | C   | G | 450 | 3  | 0.01 | 278 | 223 | 0.45 | 308  | 264 | 0.46 | 2 | 2    | 2    | tier3 | shared           | 0 |
| 7 | 101609893 | 101823173 | G   | A | 447 | 0  | 0.00 | 491 | 7   | 0.01 | 382  | 141 | 0.27 | 2 | 2    | 2    | tier3 | relapse-specific | 0 |
| 7 | 101701575 | 101914855 | C   | A | 302 | 1  | 0.00 | 320 | 3   | 0.01 | 162  | 77  | 0.32 | 2 | 2    | 2    | tier3 | relapse-specific | 0 |
| 7 | 104071491 | 104284255 | T   | G | 496 | 10 | 0.02 | 310 | 264 | 0.46 | 595  | 433 | 0.42 | 2 | 2    | 2    | tier3 | shared           | 0 |
| 7 | 104521958 | 104734722 | A   | G | 594 | 13 | 0.02 | 417 | 371 | 0.47 | 490  | 371 | 0.43 | 2 | 2    | 2    | tier2 | shared           | 0 |
| 7 | 107318832 | 107531596 | G   | A | 440 | 3  | 0.01 | 311 | 209 | 0.40 | 214  | 25  | 0.10 | 2 | 2    | 2    | tier2 | shared           | 1 |
| 7 | 111790453 | 112003217 | G   | A | 674 | 18 | 0.03 | 450 | 411 | 0.48 | 816  | 551 | 0.40 | 2 | 2    | 2    | tier3 | shared           | 0 |
| 7 | 113249295 | 113462059 | A   | T | 40  | 0  | 0.00 | 37  | 26  | 0.41 | 46   | 42  | 0.48 | 2 | 2    | 2    | tier3 | shared           | 1 |
| 7 | 116559358 | 116772122 | A   | T | 316 | 0  | 0.00 | 474 | 6   | 0.01 | 501  | 212 | 0.30 | 2 | 2    | 2    | tier3 | relapse-specific | 0 |
| 7 | 123044780 | 123257544 | G   | A | 768 | 4  | 0.01 | 691 | 175 | 0.20 | 894  | 0   | 0.00 | 2 | 2    | 2    | tier3 | tumor-specific   | 1 |
| 7 | 124764287 | 124977051 | C   | T | 582 | 6  | 0.01 | 390 | 332 | 0.46 | 608  | 417 | 0.41 | 2 | 2    | 2    | tier3 | shared           | 0 |
| 7 | 126570628 | 126783392 | G   | T | 895 | 9  | 0.01 | 552 | 477 | 0.46 | 974  | 682 | 0.41 | 2 | 2    | 2    | tier3 | shared           | 2 |
| 7 | 133740407 | 134089867 | G   | C | 384 | 4  | 0.01 | 292 | 245 | 0.46 | 464  | 388 | 0.46 | 2 | 2    | 2    | tier3 | shared           | 0 |
| 7 | 134053260 | 134402720 | C   | T | 565 | 9  | 0.02 | 356 | 273 | 0.43 | 699  | 485 | 0.41 | 2 | 2    | 2    | tier3 | shared           | 0 |
| 7 | 13405534  | 13439009  | T   | C | 477 | 0  | 0.00 | 589 | 7   | 0.01 | 316  | 129 | 0.29 | 2 | 2    | 2    | tier3 | relapse-specific | 1 |
| 7 | 135602031 | 135951491 | C   | T | 775 | 10 | 0.01 | 465 | 426 | 0.48 | 927  | 651 | 0.41 | 2 | 2    | 2    | tier3 | shared           | 0 |
| 7 | 137103410 | 137452870 | C   | A | 568 | 5  | 0.01 | 444 | 335 | 0.43 | 910  | 641 | 0.41 | 2 | 2    | 2    | tier2 | shared           | 0 |
| 7 | 142295830 | 142585708 | G   | A | 490 | 6  | 0.01 | 269 | 205 | 0.43 | 457  | 281 | 0.38 | 2 | 2    | 2    | tier3 | shared           | 0 |
| 7 | 147221246 | 147590313 | G   | T | 542 | 5  | 0.01 | 506 | 100 | 0.17 | 1170 | 1   | 0.00 | 2 | 2    | 2    | tier3 | tumor-specific   | 0 |
| 7 | 1488902   | 1522376   | G   | C | 489 | 10 | 0.02 | 251 | 218 | 0.46 | 61   | 28  | 0.31 | 2 | 1.34 | 1.39 | tier3 | shared           | 0 |
| 7 | 155190566 | 155497805 | C   | T | 636 | 6  | 0.01 | 378 | 330 | 0.47 | 504  | 364 | 0.42 | 2 | 2    | 2    | tier3 | shared           | 0 |
| 7 | 155941697 | 156248936 | C   | T | 634 | 7  | 0.01 | 449 | 362 | 0.45 | 624  | 395 | 0.39 | 2 | 2    | 2    | tier3 | shared           | 1 |
| 7 | 156275264 | 156582503 | G   | C | 671 | 4  | 0.01 | 449 | 314 | 0.41 | 924  | 90  | 0.09 | 2 | 2    | 2    | tier2 | shared           | 0 |

|   |           |           |   |   |     |    |      |     |     |      |      |     |      |   |      |      |       |                  |   |
|---|-----------|-----------|---|---|-----|----|------|-----|-----|------|------|-----|------|---|------|------|-------|------------------|---|
| 7 | 157517592 | 157824831 | C | T | 478 | 6  | 0.01 | 267 | 209 | 0.44 | 132  | 121 | 0.48 | 2 | 2    | 2    | tier3 | shared           | 2 |
| 7 | 157881758 | 158188997 | A | C | 748 | 10 | 0.01 | 431 | 358 | 0.45 | 94   | 107 | 0.53 | 2 | 2    | 2    | tier3 | shared           | 2 |
| 7 | 158142951 | 158450190 | G | A | 651 | 0  | 0.00 | 658 | 4   | 0.01 | 450  | 168 | 0.27 | 2 | 2    | 2    | tier3 | relapse-specific | 0 |
| 7 | 25018068  | 25051543  | T | A | 690 | 0  | 0.00 | 837 | 4   | 0.00 | 498  | 229 | 0.31 | 2 | 2    | 2    | tier3 | relapse-specific | 0 |
| 7 | 30364283  | 30397758  | G | A | 569 | 9  | 0.02 | 380 | 284 | 0.43 | 321  | 213 | 0.40 | 2 | 2    | 2    | tier3 | shared           | 0 |
| 7 | 36118095  | 36151570  | G | A | 528 | 7  | 0.01 | 326 | 315 | 0.49 | 579  | 470 | 0.45 | 2 | 2    | 2    | tier3 | shared           | 0 |
| 7 | 37373027  | 37406502  | A | T | 654 | 4  | 0.01 | 456 | 378 | 0.45 | 888  | 132 | 0.13 | 2 | 2    | 2    | tier3 | shared           | 0 |
| 7 | 4033084   | 4066558   | A | G | 673 | 10 | 0.01 | 391 | 328 | 0.46 | 403  | 325 | 0.45 | 2 | 2    | 2    | tier3 | shared           | 2 |
| 7 | 4129053   | 4162527   | G | A | 647 | 4  | 0.01 | 430 | 332 | 0.44 | 295  | 213 | 0.42 | 2 | 2    | 2    | tier3 | shared           | 2 |
| 7 | 42112266  | 42145741  | A | G | 596 | 15 | 0.02 | 401 | 311 | 0.44 | 580  | 413 | 0.42 | 2 | 2    | 2    | tier3 | shared           | 0 |
| 7 | 51341655  | 51374161  | G | A | 605 | 11 | 0.02 | 318 | 326 | 0.51 | 251  | 213 | 0.46 | 2 | 2    | 2    | tier3 | shared           | 0 |
| 7 | 57222145  | 57218203  | G | A | 190 | 2  | 0.01 | 85  | 77  | 0.48 | 36   | 21  | 0.37 | 2 | 2    | 2    | tier3 | shared           | 0 |
| 7 | 6179392   | 6212867   | A | C | 646 | 8  | 0.01 | 504 | 335 | 0.40 | 648  | 1   | 0.00 | 2 | 2    | 2    | tier3 | tumor-specific   | 0 |
| 7 | 62817336  | 63179901  | A | G | 621 | 8  | 0.01 | 399 | 296 | 0.43 | 411  | 235 | 0.36 | 2 | 0.43 | 0.66 | tier2 | shared           | 0 |
| 7 | 83555809  | 83717873  | A | G | 559 | 9  | 0.02 | 314 | 318 | 0.50 | 325  | 261 | 0.45 | 2 | 2    | 2    | tier3 | shared           | 2 |
| 7 | 86027626  | 86189690  | G | A | 758 | 11 | 0.01 | 403 | 357 | 0.47 | 880  | 522 | 0.37 | 2 | 2    | 2    | tier3 | shared           | 1 |
| 7 | 90612944  | 90775008  | T | C | 573 | 7  | 0.01 | 397 | 276 | 0.41 | 992  | 563 | 0.36 | 2 | 2    | 2    | tier3 | shared           | 0 |
| 7 | 95042761  | 95204825  | G | A | 769 | 7  | 0.01 | 511 | 388 | 0.43 | 823  | 3   | 0.00 | 2 | 2    | 2    | tier3 | tumor-specific   | 1 |
| 8 | 10506675  | 10469265  | G | A | 338 | 4  | 0.01 | 187 | 146 | 0.44 | 110  | 63  | 0.36 | 2 | 2    | 2    | tier1 | shared           | 3 |
| 8 | 112237114 | 112167938 | C | T | 403 | 7  | 0.02 | 293 | 200 | 0.41 | 219  | 144 | 0.40 | 2 | 2    | 2    | tier2 | shared           | 1 |
| 8 | 113969221 | 113900045 | A | C | 569 | 2  | 0.00 | 426 | 370 | 0.46 | 608  | 421 | 0.41 | 2 | 2    | 2    | tier3 | shared           | 2 |
| 8 | 114061517 | 113992341 | C | A | 207 | 0  | 0.00 | 160 | 29  | 0.15 | 90   | 0   | 0.00 | 2 | 2    | 2    | tier3 | tumor-specific   | 2 |
| 8 | 115392566 | 115323390 | G | A | 497 | 13 | 0.03 | 280 | 272 | 0.49 | 239  | 176 | 0.42 | 2 | 2    | 2    | tier2 | shared           | 1 |
| 8 | 118042077 | 117972896 | C | G | 875 | 12 | 0.01 | 567 | 396 | 0.41 | 1122 | 3   | 0.00 | 2 | 2    | 2    | tier3 | tumor-specific   | 0 |
| 8 | 122275659 | 122206478 | T | A | 618 | 12 | 0.02 | 386 | 322 | 0.45 | 813  | 529 | 0.39 | 2 | 2    | 2    | tier2 | shared           | 0 |
| 8 | 123028149 | 122958968 | A | T | 404 | 7  | 0.02 | 363 | 290 | 0.44 | 518  | 410 | 0.44 | 2 | 2    | 2    | tier3 | shared           | 1 |
| 8 | 128036043 | 127966861 | T | C | 762 | 13 | 0.02 | 500 | 478 | 0.49 | 1190 | 911 | 0.43 | 2 | 2    | 2    | tier3 | shared           | 1 |
| 8 | 131174594 | 131105412 | T | C | 702 | 9  | 0.01 | 392 | 302 | 0.44 | 1055 | 754 | 0.42 | 2 | 2    | 2    | tier3 | shared           | 0 |
| 8 | 132097125 | 132027943 | A | - | 434 | 6  | 0.01 | 264 | 192 | 0.42 | 290  | 175 | 0.38 | 2 | 2    | 2    | tier3 | shared           | 0 |
| 8 | 134943869 | 134874687 | C | G | 360 | 47 | 0.12 | 294 | 216 | 0.42 | 666  | 428 | 0.39 | 2 | 2    | 2    | tier3 | shared           | 1 |
| 8 | 135796003 | 135726821 | A | G | 922 | 12 | 0.01 | 569 | 401 | 0.41 | 503  | 69  | 0.12 | 2 | 2    | 2    | tier3 | shared           | 0 |
| 8 | 137034741 | 136965559 | T | C | 456 | 12 | 0.03 | 297 | 278 | 0.48 | 504  | 376 | 0.43 | 2 | 2    | 2    | tier3 | shared           | 1 |
| 8 | 137468026 | 137398844 | A | G | 41  | 0  | 0.00 | 32  | 34  | 0.52 | 28   | 24  | 0.46 | 2 | 2    | 2    | tier3 | shared           | 1 |
| 8 | 138290660 | 138221478 | G | A | 612 | 13 | 0.02 | 366 | 311 | 0.46 | 476  | 338 | 0.42 | 2 | 2    | 2    | tier3 | shared           | 1 |
| 8 | 140518544 | 140449362 | C | T | 646 | 4  | 0.01 | 439 | 333 | 0.43 | 658  | 493 | 0.43 | 2 | 2    | 2    | tier3 | shared           | 1 |
| 8 | 15851312  | 15806941  | G | A | 811 | 14 | 0.02 | 408 | 347 | 0.46 | 637  | 449 | 0.41 | 2 | 2    | 2    | tier3 | shared           | 1 |
| 8 | 17462562  | 17418270  | C | T | 632 | 1  | 0.00 | 614 | 135 | 0.18 | 939  | 0   | 0.00 | 2 | 2    | 2    | tier3 | tumor-specific   | 0 |
| 8 | 18259595  | 18215315  | G | A | 640 | 6  | 0.01 | 401 | 325 | 0.45 | 719  | 513 | 0.42 | 2 | 2    | 2    | tier3 | shared           | 0 |
| 8 | 18423549  | 18379269  | C | - | 481 | 3  | 0.01 | 332 | 229 | 0.41 | 702  | 513 | 0.42 | 2 | 2    | 2    | tier3 | shared           | 1 |
| 8 | 19134873  | 19090593  | G | A | 628 | 6  | 0.01 | 503 | 439 | 0.47 | 491  | 413 | 0.46 | 2 | 2    | 2    | tier3 | shared           | 0 |

|   |           |           |   |    |     |    |      |     |     |      |      |     |      |   |   |   |       |                  |   |
|---|-----------|-----------|---|----|-----|----|------|-----|-----|------|------|-----|------|---|---|---|-------|------------------|---|
| 8 | 19797430  | 19753150  | C | T  | 536 | 8  | 0.01 | 360 | 221 | 0.38 | 499  | 146 | 0.23 | 2 | 2 | 2 | tier3 | shared           | 0 |
| 8 | 23399978  | 23344033  | G | A  | 642 | 7  | 0.01 | 392 | 311 | 0.44 | 294  | 185 | 0.39 | 2 | 2 | 2 | tier3 | shared           | 0 |
| 8 | 25223614  | 25167697  | T | C  | 497 | 6  | 0.01 | 397 | 297 | 0.43 | 530  | 312 | 0.37 | 2 | 2 | 2 | tier3 | shared           | 1 |
| 8 | 26147194  | 26091277  | - | AT | 382 | 3  | 0.01 | 280 | 155 | 0.36 | 363  | 110 | 0.23 | 2 | 2 | 2 | tier3 | shared           | 1 |
| 8 | 37071774  | 36952616  | C | T  | 413 | 5  | 0.01 | 196 | 170 | 0.46 | 700  | 98  | 0.12 | 2 | 2 | 2 | tier3 | shared           | 1 |
| 8 | 43485609  | 43366452  | G | C  | 336 | 4  | 0.01 | 261 | 191 | 0.42 | 103  | 60  | 0.37 | 2 | 2 | 2 | tier3 | shared           | 0 |
| 8 | 52755739  | 52593186  | T | C  | 382 | 4  | 0.01 | 274 | 199 | 0.42 | 321  | 265 | 0.45 | 2 | 2 | 2 | tier3 | shared           | 1 |
| 8 | 55700208  | 55537655  | G | A  | 688 | 11 | 0.02 | 489 | 376 | 0.43 | 467  | 354 | 0.43 | 2 | 2 | 2 | tier1 | shared           | 1 |
| 8 | 56048319  | 55885765  | G | A  | 783 | 10 | 0.01 | 399 | 357 | 0.47 | 949  | 558 | 0.37 | 2 | 2 | 2 | tier3 | shared           | 1 |
| 8 | 57570082  | 57407528  | G | A  | 737 | 8  | 0.01 | 376 | 328 | 0.47 | 508  | 362 | 0.42 | 2 | 2 | 2 | tier3 | shared           | 1 |
| 8 | 58670535  | 58507981  | G | A  | 725 | 8  | 0.01 | 477 | 409 | 0.46 | 636  | 463 | 0.42 | 2 | 2 | 2 | tier3 | shared           | 0 |
| 8 | 66169424  | 66006870  | G | T  | 463 | 10 | 0.02 | 344 | 282 | 0.45 | 529  | 347 | 0.40 | 2 | 2 | 2 | tier2 | shared           | 1 |
| 8 | 72476284  | 72313730  | G | A  | 769 | 4  | 0.01 | 712 | 158 | 0.18 | 1159 | 0   | 0.00 | 2 | 2 | 2 | tier3 | tumor-specific   | 0 |
| 8 | 72546076  | 72383522  | A | T  | 625 | 5  | 0.01 | 391 | 296 | 0.43 | 419  | 282 | 0.40 | 2 | 2 | 2 | tier3 | shared           | 0 |
| 8 | 73514564  | 73352010  | G | A  | 760 | 0  | 0.00 | 888 | 8   | 0.01 | 772  | 316 | 0.29 | 2 | 2 | 2 | tier3 | relapse-specific | 0 |
| 8 | 75389062  | 75226507  | G | A  | 924 | 12 | 0.01 | 532 | 483 | 0.48 | 395  | 267 | 0.40 | 2 | 2 | 2 | tier3 | shared           | 0 |
| 8 | 75738723  | 75576168  | G | A  | 758 | 12 | 0.02 | 444 | 338 | 0.43 | 1135 | 778 | 0.41 | 2 | 2 | 2 | tier3 | shared           | 0 |
| 8 | 76476615  | 76314060  | C | T  | 516 | 0  | 0.00 | 570 | 7   | 0.01 | 275  | 119 | 0.30 | 2 | 2 | 2 | tier3 | relapse-specific | 1 |
| 8 | 76851577  | 76689022  | C | -  | 545 | 6  | 0.01 | 372 | 308 | 0.45 | 376  | 281 | 0.43 | 2 | 2 | 2 | tier3 | shared           | 0 |
| 8 | 77816396  | 77653841  | C | G  | 508 | 13 | 0.02 | 344 | 291 | 0.46 | 824  | 539 | 0.40 | 2 | 2 | 2 | tier3 | shared           | 1 |
| 8 | 85107492  | 84944937  | C | T  | 966 | 14 | 0.01 | 559 | 412 | 0.42 | 845  | 126 | 0.13 | 2 | 2 | 2 | tier2 | shared           | 1 |
| 8 | 85843154  | 85680599  | G | A  | 591 | 8  | 0.01 | 399 | 300 | 0.43 | 1108 | 715 | 0.39 | 2 | 2 | 2 | tier3 | shared           | 0 |
| 8 | 89286241  | 89217125  | C | T  | 652 | 3  | 0.00 | 412 | 347 | 0.46 | 716  | 536 | 0.43 | 2 | 2 | 2 | tier3 | shared           | 0 |
| 8 | 89616994  | 89547878  | T | C  | 718 | 9  | 0.01 | 392 | 346 | 0.47 | 932  | 543 | 0.37 | 2 | 2 | 2 | tier3 | shared           | 1 |
| 8 | 93370813  | 93301637  | C | A  | 517 | 8  | 0.02 | 323 | 259 | 0.45 | 563  | 390 | 0.41 | 2 | 2 | 2 | tier2 | shared           | 1 |
| 8 | 9643212   | 9605802   | C | G  | 664 | 9  | 0.01 | 394 | 316 | 0.45 | 517  | 369 | 0.42 | 2 | 2 | 2 | tier2 | shared           | 0 |
| 8 | 96685869  | 96616693  | A | G  | 794 | 8  | 0.01 | 478 | 415 | 0.46 | 299  | 207 | 0.41 | 2 | 2 | 2 | tier3 | shared           | 0 |
| 8 | 99211320  | 99142144  | A | C  | 772 | 8  | 0.01 | 510 | 378 | 0.43 | 497  | 328 | 0.40 | 2 | 2 | 2 | tier3 | shared           | 0 |
| 9 | 105869891 | 106830070 | A | T  | 460 | 5  | 0.01 | 327 | 254 | 0.44 | 330  | 234 | 0.41 | 2 | 2 | 2 | tier3 | shared           | 0 |
| 9 | 108932860 | 109893039 | G | A  | 484 | 6  | 0.01 | 354 | 218 | 0.38 | 351  | 221 | 0.39 | 2 | 2 | 2 | tier3 | shared           | 0 |
| 9 | 11173362  | 11183362  | G | A  | 642 | 11 | 0.02 | 432 | 326 | 0.43 | 507  | 310 | 0.38 | 2 | 2 | 2 | tier3 | shared           | 1 |
| 9 | 11413168  | 11423168  | G | T  | 721 | 0  | 0.00 | 860 | 4   | 0.00 | 795  | 282 | 0.26 | 2 | 2 | 2 | tier2 | relapse-specific | 1 |
| 9 | 116084387 | 117044566 | G | A  | 429 | 6  | 0.01 | 285 | 196 | 0.41 | 79   | 62  | 0.44 | 2 | 2 | 2 | tier1 | shared           | 1 |
| 9 | 120306397 | 121266576 | A | T  | 713 | 12 | 0.02 | 464 | 396 | 0.46 | 673  | 521 | 0.44 | 2 | 2 | 2 | tier2 | shared           | 1 |
| 9 | 120330151 | 121290330 | A | T  | 705 | 8  | 0.01 | 515 | 401 | 0.44 | 847  | 623 | 0.42 | 2 | 2 | 2 | tier3 | shared           | 1 |
| 9 | 121505224 | 122465403 | C | T  | 654 | 15 | 0.02 | 399 | 316 | 0.44 | 2210 | 270 | 0.11 | 2 | 2 | 2 | tier3 | shared           | 1 |
| 9 | 121657474 | 122617653 | C | T  | 383 | 6  | 0.02 | 317 | 270 | 0.46 | 1105 | 955 | 0.46 | 2 | 2 | 2 | tier3 | shared           | 0 |
| 9 | 123859764 | 124819943 | A | G  | 635 | 4  | 0.01 | 383 | 299 | 0.44 | 682  | 100 | 0.13 | 2 | 2 | 2 | tier3 | shared           | 0 |
| 9 | 124312959 | 125273138 | C | T  | 527 | 5  | 0.01 | 376 | 256 | 0.41 | 1394 | 2   | 0.00 | 2 | 2 | 2 | tier1 | tumor-specific   | 1 |
| 9 | 12504476  | 12514476  | G | A  | 805 | 9  | 0.01 | 369 | 313 | 0.46 | 893  | 572 | 0.39 | 2 | 2 | 2 | tier3 | shared           | 1 |

|   |           |           |   |   |     |    |      |     |     |      |      |     |      |   |      |      |       |                  |   |
|---|-----------|-----------|---|---|-----|----|------|-----|-----|------|------|-----|------|---|------|------|-------|------------------|---|
| 9 | 125059195 | 126019374 | C | T | 777 | 9  | 0.01 | 490 | 447 | 0.48 | 580  | 415 | 0.42 | 2 | 2    | 2    | tier3 | shared           | 0 |
| 9 | 135505247 | 136515426 | C | T | 398 | 9  | 0.02 | 278 | 259 | 0.48 | 173  | 138 | 0.44 | 2 | 2    | 2    | tier3 | shared           | 0 |
| 9 | 17216283  | 17226283  | C | T | 386 | 6  | 0.02 | 257 | 226 | 0.47 | 166  | 117 | 0.41 | 2 | 2    | 2    | tier1 | shared           | 0 |
| 9 | 21738898  | 21748898  | G | A | 449 | 7  | 0.02 | 264 | 200 | 0.43 | 177  | 168 | 0.49 | 2 | 2    | 2    | tier3 | shared           | 0 |
| 9 | 24735941  | 24745941  | G | A | 551 | 4  | 0.01 | 354 | 298 | 0.46 | 458  | 313 | 0.41 | 2 | 2    | 2    | tier2 | shared           | 1 |
| 9 | 24757662  | 24767662  | C | A | 817 | 8  | 0.01 | 489 | 373 | 0.43 | 970  | 3   | 0.00 | 2 | 2    | 2    | tier3 | tumor-specific   | 1 |
| 9 | 26298028  | 26308028  | G | C | 747 | 15 | 0.02 | 512 | 445 | 0.46 | 677  | 483 | 0.42 | 2 | 2    | 2    | tier3 | shared           | 1 |
| 9 | 27997115  | 28007115  | C | T | 865 | 14 | 0.02 | 574 | 423 | 0.42 | 1975 | 5   | 0.00 | 2 | 2    | 2    | tier3 | tumor-specific   | 1 |
| 9 | 28164689  | 28174689  | G | A | 780 | 15 | 0.02 | 530 | 386 | 0.42 | 643  | 104 | 0.14 | 2 | 2    | 2    | tier3 | shared           | 1 |
| 9 | 28922586  | 28932586  | G | A | 518 | 4  | 0.01 | 322 | 279 | 0.46 | 486  | 300 | 0.38 | 2 | 2    | 2    | tier3 | shared           | 0 |
| 9 | 2900026   | 2910026   | A | G | 676 | 13 | 0.02 | 456 | 351 | 0.43 | 350  | 255 | 0.42 | 2 | 2    | 2    | tier2 | shared           | 0 |
| 9 | 30807342  | 30817342  | T | C | 495 | 11 | 0.02 | 358 | 297 | 0.45 | 377  | 265 | 0.41 | 2 | 2    | 2    | tier3 | shared           | 0 |
| 9 | 30956521  | 30966521  | C | T | 449 | 9  | 0.02 | 321 | 236 | 0.42 | 221  | 216 | 0.49 | 2 | 2    | 2    | tier3 | shared           | 0 |
| 9 | 31574972  | 31584972  | T | - | 564 | 18 | 0.03 | 360 | 265 | 0.42 | 452  | 66  | 0.13 | 2 | 2    | 2    | tier3 | shared           | 1 |
| 9 | 33588933  | 33598933  | T | G | 156 | 2  | 0.01 | 95  | 76  | 0.44 | 178  | 119 | 0.40 | 2 | 2    | 2    | tier3 | shared           | 1 |
| 9 | 4574855   | 4584855   | C | T | 790 | 7  | 0.01 | 525 | 425 | 0.45 | 2000 | 6   | 0.00 | 2 | 2    | 2    | tier3 | tumor-specific   | 1 |
| 9 | 6574961   | 6584961   | C | T | 719 | 12 | 0.02 | 462 | 351 | 0.43 | 552  | 369 | 0.40 | 2 | 2    | 2    | tier3 | shared           | 0 |
| 9 | 73195718  | 74005898  | G | A | 697 | 6  | 0.01 | 458 | 367 | 0.44 | 595  | 396 | 0.40 | 2 | 2    | 2    | tier3 | shared           | 1 |
| 9 | 77399619  | 78209799  | G | A | 623 | 7  | 0.01 | 361 | 277 | 0.43 | 980  | 1   | 0.00 | 2 | 2    | 2    | tier3 | tumor-specific   | 1 |
| 9 | 78323275  | 79133455  | A | G | 320 | 2  | 0.01 | 214 | 177 | 0.45 | 188  | 152 | 0.45 | 2 | 2    | 2    | tier3 | shared           | 0 |
| 9 | 7987216   | 7997216   | G | A | 587 | 0  | 0.00 | 660 | 10  | 0.01 | 764  | 322 | 0.30 | 2 | 2    | 2    | tier3 | relapse-specific | 1 |
| 9 | 81024926  | 81835106  | C | T | 614 | 11 | 0.02 | 386 | 307 | 0.44 | 453  | 312 | 0.41 | 2 | 2    | 2    | tier3 | shared           | 1 |
| 9 | 84985243  | 85795423  | A | G | 529 | 5  | 0.01 | 327 | 293 | 0.47 | 464  | 324 | 0.41 | 2 | 2    | 2    | tier3 | shared           | 1 |
| 9 | 87569444  | 88379624  | C | T | 460 | 11 | 0.02 | 275 | 214 | 0.44 | 162  | 114 | 0.41 | 2 | 2    | 2    | tier1 | shared           | 1 |
| 9 | 92449569  | 93409749  | C | T | 728 | 5  | 0.01 | 486 | 396 | 0.45 | 637  | 438 | 0.41 | 2 | 2    | 2    | tier3 | shared           | 0 |
| 9 | 97039394  | 97999573  | C | T | 609 | 9  | 0.01 | 508 | 465 | 0.48 | 1294 | 879 | 0.40 | 2 | 2    | 2    | tier3 | shared           | 1 |
| X | 10294020  | 10334020  | - | T | 235 | 1  | 0.00 | 35  | 174 | 0.83 | 82   | 298 | 0.78 | 2 | 0.99 | 1    | tier2 | shared           | 1 |
| X | 105876728 | 105990072 | G | A | 343 | 10 | 0.03 | 40  | 342 | 0.90 | 56   | 372 | 0.87 | 2 | 0.97 | 0.99 | tier2 | shared           | 0 |
| X | 11680134  | 11770213  | C | G | 351 | 11 | 0.03 | 30  | 271 | 0.90 | 38   | 265 | 0.87 | 2 | 0.99 | 1    | tier3 | shared           | 0 |
| X | 117622824 | 117738796 | G | A | 319 | 9  | 0.03 | 36  | 337 | 0.90 | 166  | 971 | 0.85 | 2 | 0.97 | 0.99 | tier3 | shared           | 1 |
| X | 135789240 | 135961574 | C | A | 284 | 8  | 0.03 | 37  | 240 | 0.87 | 52   | 180 | 0.78 | 2 | 0.99 | 1.01 | tier1 | shared           | 1 |
| X | 141024741 | 141197075 | G | T | 401 | 0  | 0.00 | 372 | 0   | 0.00 | 251  | 325 | 0.56 | 2 | 0.97 | 1    | tier3 | relapse-specific | 0 |
| X | 143123430 | 143295730 | A | C | 350 | 11 | 0.03 | 41  | 365 | 0.90 | 77   | 371 | 0.83 | 2 | 2    | 2    | tier3 | shared           | 1 |
| X | 144114037 | 144306345 | T | A | 264 | 6  | 0.02 | 20  | 205 | 0.91 | 87   | 267 | 0.75 | 2 | 0.99 | 1.01 | tier3 | shared           | 0 |
| X | 17368749  | 17458828  | T | C | 219 | 11 | 0.05 | 24  | 269 | 0.92 | 84   | 474 | 0.85 | 2 | 0.99 | 1    | tier3 | shared           | 0 |
| X | 24850996  | 24941075  | G | A | 316 | 0  | 0.00 | 383 | 0   | 0.00 | 438  | 56  | 0.11 | 2 | 0.99 | 1    | tier3 | relapse-specific | 0 |
| X | 27447388  | 27537467  | C | T | 181 | 7  | 0.04 | 17  | 158 | 0.90 | 42   | 237 | 0.85 | 2 | 0.99 | 1    | tier3 | shared           | 0 |
| X | 29590698  | 29680777  | C | T | 301 | 8  | 0.03 | 35  | 356 | 0.91 | 49   | 319 | 0.87 | 2 | 0.99 | 1    | tier3 | shared           | 0 |
| X | 32121858  | 32211937  | G | C | 311 | 7  | 0.02 | 22  | 311 | 0.93 | 52   | 339 | 0.87 | 2 | 0.99 | 1    | tier3 | shared           | 1 |
| X | 33727134  | 33817213  | C | T | 349 | 0  | 0.00 | 408 | 5   | 0.01 | 358  | 420 | 0.54 | 2 | 0.99 | 1    | tier3 | relapse-specific | 1 |



|   |          |          |                      |   |     |   |      |     |     |      |     |     |      |   |      |      |       |                  |   |
|---|----------|----------|----------------------|---|-----|---|------|-----|-----|------|-----|-----|------|---|------|------|-------|------------------|---|
| X | 34820105 | 34910184 | T                    | G | 284 | 8 | 0.03 | 39  | 313 | 0.89 | 387 | 130 | 0.25 | 2 | 0.99 | 1    | tier3 | shared           | 1 |
| X | 35245727 | 35335806 | T                    | C | 462 | 9 | 0.02 | 53  | 393 | 0.88 | 104 | 564 | 0.84 | 2 | 0.99 | 1    | tier3 | shared           | 1 |
| X | 55215216 | 55198491 | G                    | A | 151 | 3 | 0.02 | 25  | 210 | 0.89 | 38  | 214 | 0.85 | 2 | 0.93 | 0.94 | tier1 | shared           | 1 |
| X | 6192868  | 6182868  | G                    | A | 290 | 6 | 0.02 | 32  | 264 | 0.89 | 46  | 181 | 0.80 | 2 | 0.99 | 1    | tier3 | shared           | 1 |
| X | 7410725  | 7400725  | G                    | A | 278 | 7 | 0.02 | 20  | 273 | 0.93 | 114 | 538 | 0.83 | 2 | 0.99 | 1    | tier3 | shared           | 1 |
| X | 81797394 | 81910738 | G                    | T | 463 | 8 | 0.02 | 73  | 467 | 0.86 | 871 | 255 | 0.23 | 2 | 0.98 | 0.95 | tier3 | shared           | 1 |
| X | 86716242 | 86829586 | T                    | C | 273 | 5 | 0.02 | 31  | 331 | 0.91 | 68  | 312 | 0.82 | 2 | 0.98 | 0.95 | tier3 | shared           | 1 |
| X | 97913227 | 98026571 | G                    | T | 249 | 8 | 0.03 | 38  | 212 | 0.85 | 136 | 1   | 0.01 | 2 | 0.97 | 0.95 | tier3 | tumor-specific   | 1 |
| Y | 16229629 | 17720235 | G                    | T | 412 | 5 | 0.01 | 337 | 161 | 0.32 | 741 | 0   | 0.00 | 2 | 2    | 2    | tier3 | tumor-specific   | 0 |
| Y | 16302321 | 17792927 | G                    | A | 340 | 0 | 0.00 | 388 | 5   | 0.01 | 534 | 739 | 0.58 | 2 | 2    | 2    | tier3 | relapse-specific | 1 |
| Y | 5180662  | 5120662  | TTAAGAGTTTAACTTACCAT | - | 129 | 4 | 0.03 | 6   | 193 | 0.97 | 44  | 239 | 0.84 | 2 | 2    | 2    | tier2 | shared           | 0 |
| Y | 8195097  | 8135097  | G                    | T | 183 | 4 | 0.02 | 17  | 194 | 0.92 | 55  | 300 | 0.85 | 2 | 2    | 2    | tier3 | shared           | 0 |
| Y | 8487910  | 8427910  | C                    | A | 297 | 0 | 0.00 | 374 | 7   | 0.02 | 175 | 230 | 0.57 | 2 | 2    | 2    | tier3 | relapse-specific | 1 |

**Supplementary Table 6c.** Somatic point mutations and indels from UPN 452198 tumor-relapse pair used for mutation spectrum and clonality analyses. Mutations identified in the relapse sample with <2% allele frequencies in the primary tumor were classified as relapse-specific.

| Chr | Start (NCBI 36) | Start (GRCh37) | Ref | Var | NormalRefReads | NormalVarReads | NormalVarFreq | TumorRefReads | TumorVarReads | TumorVarFreq | RelapseRefReads | RelapseVarReads | RelapseVarFreq | NormalCN | TumorCN | RelapseCN | Tier  | Classification   | # of samples recurrent (out of 200) |
|-----|-----------------|----------------|-----|-----|----------------|----------------|---------------|---------------|---------------|--------------|-----------------|-----------------|----------------|----------|---------|-----------|-------|------------------|-------------------------------------|
| 1   | 107357719       | 107556196      | C   | T   | 512            | 3              | 0.01          | 576           | 2             | 0.00         | 420             | 43              | 0.09           | 2        | 2       | 2         | tier3 | relapse-specific | 0                                   |
| 1   | 108346944       | 108545421      | A   | G   | 612            | 187            | 0.23          | 451           | 421           | 0.48         | 542             | 136             | 0.20           | 2        | 2       | 2         | tier3 | shared           | 1                                   |
| 1   | 147392656       | 149126032      | C   | A   | 468            | 61             | 0.12          | 126           | 38            | 0.23         | 412             | 54              | 0.12           | 2        | 3.18    | 2.93      | tier3 | shared           | 0                                   |
| 1   | 168399126       | 170132502      | C   | T   | 602            | 24             | 0.04          | 972           | 129           | 0.12         | 518             | 0               | 0.00           | 2        | 2       | 2         | tier2 | tumor-specific   | 0                                   |
| 1   | 179307551       | 181040928      | A   | G   | 566            | 6              | 0.01          | 805           | 14            | 0.02         | 458             | 78              | 0.15           | 2        | 2       | 2         | tier3 | relapse-specific | 0                                   |
| 1   | 218018901       | 219952278      | G   | A   | 600            | 4              | 0.01          | 1139          | 13            | 0.01         | 362             | 99              | 0.21           | 2        | 2       | 2         | tier3 | relapse-specific | 0                                   |
| 1   | 224145610       | 226078987      | T   | C   | 548            | 0              | 0.00          | 549           | 0             | 0.00         | 533             | 30              | 0.05           | 2        | 2       | 2         | tier3 | relapse-specific | 0                                   |
| 1   | 230352346       | 232285723      | G   | A   | 623            | 183            | 0.23          | 682           | 594           | 0.47         | 647             | 123             | 0.16           | 2        | 2       | 2         | tier3 | shared           | 1                                   |
| 1   | 93246772        | 93474184       | G   | A   | 534            | 92             | 0.15          | 440           | 231           | 0.34         | 673             | 2               | 0.00           | 2        | 2       | 2         | tier2 | tumor-specific   | 1                                   |
| 10  | 19424827        | 19384821       | C   | T   | 693            | 32             | 0.04          | 892           | 120           | 0.12         | 601             | 0               | 0.00           | 2        | 2       | 2         | tier3 | tumor-specific   | 0                                   |
| 10  | 67480185        | 67810179       | T   | C   | 458            | 118            | 0.20          | 570           | 541           | 0.49         | 490             | 108             | 0.18           | 2        | 2       | 2         | tier2 | shared           | 1                                   |
| 10  | 73025816        | 73355810       | T   | A   | 403            | 113            | 0.22          | 326           | 274           | 0.46         | 415             | 77              | 0.16           | 2        | 2       | 2         | tier3 | shared           | 1                                   |
| 11  | 134164355       | 134659145      | C   | T   | 395            | 108            | 0.21          | 399           | 402           | 0.50         | 275             | 58              | 0.17           | 2        | 2       | 2         | tier3 | shared           | 1                                   |
| 11  | 20709294        | 20752718       | G   | T   | 578            | 153            | 0.21          | 517           | 550           | 0.52         | 536             | 162             | 0.23           | 2        | 2       | 2         | tier3 | shared           | 1                                   |
| 11  | 23583427        | 23626851       | G   | A   | 572            | 7              | 0.01          | 698           | 8             | 0.01         | 447             | 76              | 0.15           | 2        | 2       | 2         | tier3 | relapse-specific | 1                                   |
| 11  | 40183906        | 40227330       | C   | A   | 522            | 0              | 0.00          | 551           | 1             | 0.00         | 523             | 32              | 0.06           | 2        | 2       | 2         | tier3 | relapse-specific | 1                                   |
| 11  | 64821076        | 65064500       | G   | A   | 458            | 127            | 0.22          | 283           | 216           | 0.43         | 343             | 83              | 0.19           | 2        | 2       | 2         | tier3 | shared           | 1                                   |
| 11  | 81529767        | 81852119       | G   | A   | 644            | 1              | 0.00          | 589           | 1             | 0.00         | 515             | 65              | 0.11           | 2        | 2       | 2         | tier2 | relapse-specific | 1                                   |
| 11  | 87110939        | 87433291       | G   | T   | 481            | 15             | 0.03          | 656           | 88            | 0.12         | 442             | 0               | 0.00           | 2        | 2       | 2         | tier3 | tumor-specific   | 1                                   |
| 12  | 126748215       | 128182262      | G   | A   | 411            | 2              | 0.00          | 353           | 9             | 0.02         | 354             | 71              | 0.17           | 2        | 2       | 2         | tier3 | shared           | 1                                   |
| 12  | 22283439        | 22392172       | A   | C   | 464            | 0              | 0.00          | 877           | 0             | 0.00         | 385             | 41              | 0.10           | 2        | 2       | 2         | tier3 | relapse-specific | 0                                   |
| 12  | 32680434        | 32789167       | G   | T   | 373            | 107            | 0.22          | 359           | 302           | 0.46         | 235             | 53              | 0.18           | 2        | 2       | 2         | tier2 | shared           | 0                                   |
| 12  | 38373226        | 40086959       | A   | T   | 555            | 0              | 0.00          | 1091          | 1             | 0.00         | 541             | 32              | 0.06           | 2        | 2       | 2         | tier3 | relapse-specific | 0                                   |
| 12  | 56144791        | 57858524       | C   | A   | 604            | 156            | 0.21          | 487           | 503           | 0.51         | 482             | 116             | 0.19           | 2        | 2       | 2         | tier1 | shared           | 2                                   |
| 12  | 57438067        | 59151800       | G   | A   | 696            | 29             | 0.04          | 1508          | 223           | 0.13         | 567             | 144             | 0.20           | 2        | 2       | 2         | tier3 | shared           | 1                                   |
| 12  | 9702101         | 9810834        | A   | G   | 450            | 0              | 0.00          | 663           | 1             | 0.00         | 400             | 56              | 0.12           | 2        | 2       | 2         | tier1 | relapse-specific | 0                                   |
| 13  | 104876739       | 106078738      | A   | G   | 98             | 0              | 0.00          | 98            | 2             | 0.02         | 101             | 17              | 0.14           | 2        | 2       | 2         | tier3 | shared           | 1                                   |
| 13  | 21865814        | 22967814       | C   | A   | 473            | 105            | 0.18          | 602           | 611           | 0.50         | 405             | 89              | 0.18           | 2        | 2       | 2         | tier3 | shared           | 1                                   |

|    |           |           |   |   |     |     |      |      |     |      |     |     |      |   |      |      |       |                  |    |
|----|-----------|-----------|---|---|-----|-----|------|------|-----|------|-----|-----|------|---|------|------|-------|------------------|----|
| 13 | 27490642  | 28592642  | C | G | 638 | 106 | 0.14 | 612  | 234 | 0.28 | 600 | 0   | 0.00 | 2 | 2    | 2    | tier1 | tumor-specific   | 50 |
| 13 | 60889651  | 61991650  | C | G | 498 | 1   | 0.00 | 438  | 0   | 0.00 | 470 | 47  | 0.09 | 2 | 2    | 2    | tier3 | relapse-specific | 0  |
| 13 | 74029037  | 75131036  | G | T | 579 | 100 | 0.15 | 1001 | 519 | 0.34 | 618 | 0   | 0.00 | 2 | 2    | 2    | tier3 | tumor-specific   | 1  |
| 13 | 92398000  | 93599999  | T | C | 428 | 75  | 0.15 | 396  | 224 | 0.36 | 469 | 0   | 0.00 | 2 | 2    | 2    | tier3 | tumor-specific   | 1  |
| 13 | 92466026  | 93668025  | G | A | 848 | 0   | 0.00 | 1513 | 0   | 0.00 | 657 | 90  | 0.12 | 2 | 2    | 2    | tier3 | relapse-specific | 1  |
| 14 | 47961450  | 48891700  | T | C | 436 | 4   | 0.01 | 435  | 6   | 0.01 | 372 | 62  | 0.14 | 2 | 2    | 2    | tier3 | relapse-specific | 1  |
| 14 | 82608644  | 83538891  | G | A | 452 | 2   | 0.00 | 451  | 8   | 0.02 | 412 | 80  | 0.16 | 2 | 2    | 2    | tier2 | relapse-specific | 1  |
| 15 | 23386323  | 25835230  | G | A | 438 | 53  | 0.11 | 607  | 307 | 0.34 | 413 | 0   | 0.00 | 2 | 2    | 2    | tier3 | tumor-specific   | 0  |
| 15 | 25337871  | 27664276  | G | T | 635 | 17  | 0.03 | 816  | 94  | 0.10 | 591 | 0   | 0.00 | 2 | 2    | 2    | tier3 | tumor-specific   | 1  |
| 15 | 29317077  | 31529785  | G | A | 538 | 141 | 0.21 | 391  | 294 | 0.43 | 388 | 78  | 0.17 | 2 | 2    | 2    | tier3 | shared           | 0  |
| 15 | 86528277  | 88727273  | G | A | 409 | 129 | 0.24 | 452  | 435 | 0.49 | 378 | 82  | 0.18 | 2 | 2    | 2    | tier3 | shared           | 2  |
| 15 | 88782837  | 90981833  | G | A | 359 | 94  | 0.21 | 228  | 167 | 0.42 | 351 | 84  | 0.19 | 2 | 2    | 2    | tier2 | shared           | 0  |
| 15 | 97047801  | 99230278  | G | C | 382 | 107 | 0.22 | 647  | 578 | 0.47 | 390 | 98  | 0.20 | 2 | 2    | 2    | tier3 | shared           | 0  |
| 16 | 10944428  | 11036927  | A | G | 643 | 107 | 0.14 | 197  | 95  | 0.33 | 641 | 0   | 0.00 | 2 | 2    | 2    | tier2 | tumor-specific   | 0  |
| 16 | 22599053  | 22691552  | G | A | 820 | 150 | 0.15 | 824  | 390 | 0.32 | 639 | 96  | 0.13 | 2 | 3.28 | 2.86 | tier2 | shared           | 1  |
| 16 | 34545748  | 34688247  | G | C | 432 | 54  | 0.11 | 261  | 121 | 0.32 | 326 | 45  | 0.12 | 2 | 2.73 | 2.98 | tier3 | shared           | 0  |
| 16 | 58050635  | 59493134  | G | T | 579 | 0   | 0.00 | 977  | 0   | 0.00 | 527 | 86  | 0.14 | 2 | 2    | 2    | tier3 | relapse-specific | 1  |
| 16 | 60042403  | 61484902  | T | A | 265 | 66  | 0.20 | 320  | 280 | 0.47 | 314 | 75  | 0.19 | 2 | 2    | 2    | tier3 | shared           | 1  |
| 16 | 77431224  | 78873723  | C | T | 542 | 4   | 0.01 | 777  | 16  | 0.02 | 405 | 79  | 0.16 | 2 | 2    | 2    | tier3 | shared           | 0  |
| 16 | 7868630   | 7928629   | C | T | 719 | 19  | 0.03 | 1087 | 137 | 0.11 | 730 | 0   | 0.00 | 2 | 2    | 2    | tier3 | tumor-specific   | 0  |
| 16 | 7941529   | 8001528   | T | A | 446 | 0   | 0.00 | 480  | 0   | 0.00 | 323 | 53  | 0.14 | 2 | 2    | 2    | tier3 | relapse-specific | 1  |
| 16 | 88321243  | 89793742  | C | T | 736 | 1   | 0.00 | 230  | 0   | 0.00 | 520 | 58  | 0.10 | 2 | 2    | 2    | tier1 | relapse-specific | 0  |
| 17 | 49416138  | 52061139  | C | T | 494 | 145 | 0.23 | 589  | 508 | 0.46 | 537 | 117 | 0.18 | 2 | 2    | 2    | tier3 | shared           | 1  |
| 17 | 67861248  | 70349653  | A | G | 670 | 5   | 0.01 | 634  | 11  | 0.02 | 487 | 104 | 0.18 | 2 | 2    | 2    | tier2 | relapse-specific | 0  |
| 18 | 13606633  | 13616633  | C | T | 434 | 79  | 0.15 | 110  | 114 | 0.51 | 271 | 68  | 0.20 | 2 | 2    | 2    | tier3 | shared           | 1  |
| 19 | 13231692  | 13370692  | G | A | 595 | 108 | 0.15 | 777  | 366 | 0.32 | 485 | 1   | 0.00 | 2 | 2    | 2    | tier3 | tumor-specific   | 2  |
| 19 | 806779    | 855779    | G | T | 363 | 91  | 0.20 | 15   | 23  | 0.61 | 194 | 46  | 0.19 | 2 | 2    | 1.24 | tier1 | shared           | 1  |
| 2  | 140418446 | 140701976 | C | G | 675 | 167 | 0.20 | 616  | 487 | 0.44 | 556 | 116 | 0.17 | 2 | 2    | 2    | tier3 | shared           | 0  |
| 2  | 184186967 | 184478722 | G | T | 567 | 5   | 0.01 | 903  | 13  | 0.01 | 378 | 109 | 0.22 | 2 | 2    | 2    | tier3 | relapse-specific | 0  |
| 2  | 208821357 | 209113112 | C | T | 570 | 90  | 0.14 | 519  | 248 | 0.32 | 601 | 1   | 0.00 | 2 | 2    | 2    | tier1 | tumor-specific   | 22 |
| 2  | 213886052 | 214177807 | G | T | 657 | 5   | 0.01 | 1008 | 17  | 0.02 | 511 | 122 | 0.19 | 2 | 2    | 2    | tier3 | relapse-specific | 0  |
| 2  | 23527066  | 23673561  | T | C | 463 | 57  | 0.11 | 389  | 181 | 0.32 | 505 | 0   | 0.00 | 2 | 2    | 2    | tier3 | tumor-specific   | 0  |
| 2  | 25310746  | 25457242  | C | T | 411 | 108 | 0.21 | 320  | 315 | 0.50 | 333 | 88  | 0.21 | 2 | 2    | 2    | tier1 | shared           | 53 |
| 2  | 77165972  | 77312464  | G | A | 237 | 57  | 0.19 | 159  | 126 | 0.44 | 208 | 46  | 0.18 | 2 | 2    | 2    | tier3 | shared           | 0  |
| 20 | 17261178  | 17313178  | A | G | 494 | 0   | 0.00 | 671  | 0   | 0.00 | 458 | 31  | 0.06 | 2 | 2    | 2    | tier3 | relapse-specific | 1  |
| 20 | 58861532  | 59428137  | G | C | 563 | 4   | 0.01 | 777  | 12  | 0.02 | 505 | 105 | 0.17 | 2 | 2    | 2    | tier3 | relapse-specific | 1  |
| 21 | 23370033  | 24448162  | T | C | 629 | 1   | 0.00 | 868  | 1   | 0.00 | 526 | 57  | 0.10 | 2 | 2    | 2    | tier3 | relapse-specific | 0  |
| 21 | 30506365  | 31584494  | T | C | 477 | 126 | 0.21 | 353  | 306 | 0.46 | 477 | 94  | 0.16 | 2 | 2    | 2    | tier3 | shared           | 0  |
| 22 | 26004684  | 27674684  | T | G | 521 | 141 | 0.21 | 1054 | 792 | 0.43 | 590 | 157 | 0.21 | 2 | 2    | 2    | tier3 | shared           | 1  |
| 3  | 135449546 | 133966856 | G | A | 554 | 6   | 0.01 | 869  | 10  | 0.01 | 421 | 77  | 0.15 | 2 | 2    | 2    | tier3 | relapse-specific | 0  |

|   |           |           |   |      |     |     |      |      |     |      |     |     |      |   |   |      |       |                  |    |
|---|-----------|-----------|---|------|-----|-----|------|------|-----|------|-----|-----|------|---|---|------|-------|------------------|----|
| 3 | 182087434 | 180604740 | G | C    | 586 | 157 | 0.21 | 341  | 318 | 0.48 | 613 | 111 | 0.15 | 2 | 2 | 2    | tier3 | shared           | 0  |
| 3 | 191103363 | 189620669 | T | C    | 469 | 126 | 0.21 | 458  | 370 | 0.45 | 426 | 114 | 0.21 | 2 | 2 | 2    | tier3 | shared           | 0  |
| 3 | 192532267 | 191049573 | C | T    | 412 | 104 | 0.20 | 348  | 354 | 0.50 | 442 | 105 | 0.19 | 2 | 2 | 2    | tier3 | shared           | 0  |
| 3 | 196997137 | 195512742 | G | A    | 600 | 178 | 0.23 | 47   | 64  | 0.58 | 657 | 198 | 0.23 | 2 | 2 | 1.29 | tier1 | shared           | 2  |
| 3 | 21310708  | 21335704  | C | A    | 630 | 3   | 0.00 | 1082 | 22  | 0.02 | 477 | 94  | 0.16 | 2 | 2 | 2    | tier3 | relapse-specific | 1  |
| 3 | 43135962  | 43160958  | G | A    | 769 | 1   | 0.00 | 570  | 0   | 0.00 | 630 | 43  | 0.06 | 2 | 2 | 2    | tier3 | relapse-specific | 1  |
| 3 | 71109483  | 71026793  | C | G    | 598 | 23  | 0.04 | 554  | 73  | 0.12 | 576 | 1   | 0.00 | 2 | 2 | 2    | tier1 | tumor-specific   | 1  |
| 3 | 85564094  | 85481404  | C | T    | 627 | 97  | 0.13 | 837  | 398 | 0.32 | 553 | 1   | 0.00 | 2 | 2 | 2    | tier3 | tumor-specific   | 2  |
| 4 | 119477364 | 119257916 | C | T    | 526 | 136 | 0.21 | 455  | 389 | 0.46 | 501 | 132 | 0.21 | 2 | 2 | 2    | tier3 | shared           | 0  |
| 4 | 186999154 | 186762160 | T | G    | 242 | 66  | 0.21 | 217  | 214 | 0.50 | 313 | 72  | 0.19 | 2 | 2 | 2    | tier3 | shared           | 1  |
| 4 | 26362673  | 26753575  | T | G    | 824 | 5   | 0.01 | 1123 | 15  | 0.01 | 659 | 165 | 0.20 | 2 | 2 | 2    | tier3 | relapse-specific | 0  |
| 4 | 63345784  | 63663189  | G | A    | 512 | 74  | 0.13 | 722  | 296 | 0.29 | 639 | 0   | 0.00 | 2 | 2 | 2    | tier2 | tumor-specific   | 0  |
| 4 | 72616906  | 72398042  | T | C    | 487 | 2   | 0.00 | 561  | 14  | 0.02 | 475 | 91  | 0.16 | 2 | 2 | 2    | tier3 | shared           | 0  |
| 4 | 7394775   | 7343874   | C | T    | 494 | 111 | 0.18 | 411  | 362 | 0.47 | 363 | 79  | 0.18 | 2 | 2 | 2    | tier3 | shared           | 0  |
| 5 | 170770148 | 170837543 | - | TCTG | 169 | 34  | 0.17 | 87   | 70  | 0.45 | 182 | 27  | 0.13 | 2 | 2 | 2    | tier1 | shared           | 55 |
| 5 | 22595465  | 22559708  | T | G    | 376 | 2   | 0.01 | 325  | 6   | 0.02 | 312 | 69  | 0.18 | 2 | 2 | 2    | tier3 | relapse-specific | 0  |
| 5 | 45880881  | 45845124  | C | T    | 178 | 51  | 0.22 | 121  | 82  | 0.40 | 184 | 48  | 0.21 | 2 | 2 | 2    | tier3 | shared           | 1  |
| 5 | 67369605  | 67333849  | C | T    | 538 | 127 | 0.19 | 345  | 345 | 0.50 | 410 | 78  | 0.16 | 2 | 2 | 2    | tier3 | shared           | 1  |
| 5 | 80124072  | 80088316  | G | A    | 478 | 120 | 0.20 | 409  | 365 | 0.47 | 419 | 109 | 0.21 | 2 | 2 | 2    | tier3 | shared           | 0  |
| 5 | 93857376  | 93831620  | C | G    | 322 | 1   | 0.00 | 344  | 1   | 0.00 | 279 | 54  | 0.16 | 2 | 2 | 2    | tier3 | relapse-specific | 0  |
| 6 | 135462445 | 135420752 | T | C    | 607 | 168 | 0.22 | 764  | 598 | 0.44 | 677 | 168 | 0.20 | 2 | 2 | 2    | tier3 | shared           | 0  |
| 6 | 40467367  | 40359389  | C | A    | 649 | 0   | 0.00 | 846  | 1   | 0.00 | 446 | 52  | 0.10 | 2 | 2 | 2    | tier2 | relapse-specific | 0  |
| 6 | 77123405  | 77066685  | C | T    | 856 | 221 | 0.21 | 864  | 715 | 0.45 | 668 | 158 | 0.19 | 2 | 2 | 2    | tier3 | shared           | 1  |
| 6 | 95631430  | 95574709  | T | A    | 694 | 5   | 0.01 | 1006 | 8   | 0.01 | 601 | 108 | 0.15 | 2 | 2 | 2    | tier3 | relapse-specific | 1  |
| 7 | 120917535 | 121130299 | C | A    | 434 | 3   | 0.01 | 821  | 1   | 0.00 | 456 | 41  | 0.08 | 2 | 2 | 2    | tier3 | relapse-specific | 1  |
| 7 | 140451920 | 140805451 | G | A    | 605 | 6   | 0.01 | 781  | 14  | 0.02 | 481 | 100 | 0.17 | 2 | 2 | 2    | tier2 | relapse-specific | 0  |
| 7 | 157185399 | 157492638 | A | T    | 576 | 142 | 0.20 | 182  | 164 | 0.47 | 482 | 111 | 0.19 | 2 | 2 | 2    | tier2 | shared           | 2  |
| 7 | 48632191  | 48661645  | C | T    | 546 | 161 | 0.23 | 622  | 581 | 0.48 | 483 | 109 | 0.18 | 2 | 2 | 2    | tier3 | shared           | 1  |
| 7 | 57515887  | 57511945  | C | T    | 241 | 57  | 0.19 | 118  | 69  | 0.37 | 252 | 53  | 0.17 | 2 | 2 | 2    | tier3 | shared           | 0  |
| 7 | 85476859  | 85638923  | G | A    | 732 | 2   | 0.00 | 1428 | 20  | 0.01 | 506 | 107 | 0.17 | 2 | 2 | 2    | tier3 | relapse-specific | 1  |
| 8 | 100665275 | 100596099 | T | A    | 355 | 80  | 0.18 | 399  | 367 | 0.48 | 331 | 85  | 0.20 | 2 | 2 | 2    | tier3 | shared           | 1  |
| 8 | 115809334 | 115740158 | G | A    | 547 | 0   | 0.00 | 852  | 0   | 0.00 | 529 | 30  | 0.05 | 2 | 2 | 2    | tier3 | relapse-specific | 1  |
| 8 | 25022615  | 24966698  | A | G    | 412 | 0   | 0.00 | 302  | 0   | 0.00 | 348 | 38  | 0.10 | 2 | 2 | 2    | tier2 | relapse-specific | 1  |
| 8 | 34151385  | 34031843  | G | A    | 353 | 67  | 0.16 | 384  | 200 | 0.34 | 335 | 20  | 0.06 | 2 | 2 | 2    | tier3 | shared           | 1  |
| 8 | 34167561  | 34048019  | C | A    | 601 | 1   | 0.00 | 1706 | 1   | 0.00 | 551 | 85  | 0.13 | 2 | 2 | 2    | tier3 | relapse-specific | 1  |
| 8 | 35476742  | 35357200  | G | C    | 461 | 0   | 0.00 | 561  | 0   | 0.00 | 391 | 50  | 0.11 | 2 | 2 | 2    | tier3 | relapse-specific | 1  |
| 8 | 51256369  | 51093816  | A | G    | 688 | 0   | 0.00 | 1233 | 0   | 0.00 | 635 | 37  | 0.06 | 2 | 2 | 2    | tier3 | relapse-specific | 1  |
| 8 | 66049865  | 65887311  | C | T    | 289 | 1   | 0.00 | 245  | 5   | 0.02 | 180 | 33  | 0.15 | 2 | 2 | 2    | tier3 | shared           | 1  |
| 8 | 71467490  | 71304936  | T | G    | 255 | 58  | 0.19 | 268  | 210 | 0.44 | 268 | 60  | 0.18 | 2 | 2 | 2    | tier3 | shared           | 1  |
| 9 | 100568848 | 101529027 | A | T    | 445 | 123 | 0.22 | 274  | 233 | 0.46 | 368 | 74  | 0.17 | 2 | 2 | 2    | tier3 | shared           | 1  |

|   |           |           |   |   |     |     |      |      |      |      |     |     |      |   |      |      |       |                  |   |
|---|-----------|-----------|---|---|-----|-----|------|------|------|------|-----|-----|------|---|------|------|-------|------------------|---|
| 9 | 100720074 | 101680253 | A | G | 554 | 111 | 0.17 | 549  | 370  | 0.40 | 450 | 102 | 0.18 | 2 | 2    | 2    | tier3 | shared           | 0 |
| 9 | 108714159 | 109674338 | C | T | 629 | 90  | 0.13 | 521  | 286  | 0.35 | 633 | 0   | 0.00 | 2 | 2    | 2    | tier3 | tumor-specific   | 2 |
| 9 | 121538471 | 122498650 | C | T | 472 | 139 | 0.23 | 1096 | 1104 | 0.50 | 430 | 93  | 0.18 | 2 | 2    | 2    | tier3 | shared           | 1 |
| 9 | 137726092 | 138586271 | G | A | 451 | 7   | 0.02 | 91   | 5    | 0.05 | 272 | 59  | 0.18 | 2 | 2    | 1.26 | tier1 | shared           | 0 |
| 9 | 137816463 | 138676642 | G | A | 293 | 0   | 0.00 | 55   | 0    | 0.00 | 224 | 15  | 0.06 | 2 | 2    | 1.26 | tier1 | relapse-specific | 1 |
| 9 | 36887024  | 36897024  | C | A | 543 | 0   | 0.00 | 1482 | 1    | 0.00 | 443 | 53  | 0.11 | 2 | 2    | 2    | tier3 | relapse-specific | 0 |
| X | 105826475 | 105939819 | T | C | 240 | 6   | 0.02 | 589  | 14   | 0.02 | 150 | 79  | 0.34 | 2 | 0.97 | 1    | tier3 | shared           | 0 |
| X | 25476033  | 25566112  | C | T | 346 | 0   | 0.00 | 395  | 16   | 0.04 | 193 | 123 | 0.39 | 2 | 1    | 1.01 | tier3 | shared           | 0 |
| X | 86570002  | 86683346  | G | A | 246 | 0   | 0.00 | 376  | 1    | 0.00 | 195 | 23  | 0.11 | 2 | 0.88 | 0.98 | tier2 | relapse-specific | 0 |
| X | 92941267  | 93054611  | A | C | 251 | 24  | 0.09 | 472  | 156  | 0.25 | 274 | 0   | 0.00 | 2 | 0.91 | 0.98 | tier3 | tumor-specific   | 1 |

**Supplementary Table 6d.** Somatic point mutations and indels from UPN 573988 tumor-relapse pair used for mutation spectrum and clonality analyses. Mutations identified in the relapse sample with <2% allele frequencies in the primary tumor were classified as relapse-specific.

| Chr | Start (NCBI 36) | Start (GRCh37) | Ref | Var | NormalRefReads | NormalVarReads | NormalVarFreq | TumorRefReads | TumorVarReads | TumorVarFreq | RelapseRefReads | RelapseVarReads | RelapseVarFreq | NormalCN | TumorCN | RelapseCN | Tier  | Classification   | # of samples recurrent (out of 200) |
|-----|-----------------|----------------|-----|-----|----------------|----------------|---------------|---------------|---------------|--------------|-----------------|-----------------|----------------|----------|---------|-----------|-------|------------------|-------------------------------------|
| 15  | 88432938        | 90631934       | C   | T   | 367            | 49             | 0.12          | 136           | 18            | 0.12         | 454             | 93              | 0.17           | 2        | 2       | 2         | tier1 | shared           | 21                                  |
| 1   | 152866077       | 154599453      | A   | G   | 373            | 61             | 0.14          | 306           | 222           | 0.42         | 676             | 98              | 0.13           | 2        | 2       | 2         | tier2 | shared           | 1                                   |
| 1   | 156065861       | 157799237      | G   | T   | 402            | 79             | 0.16          | 327           | 268           | 0.45         | 507             | 97              | 0.16           | 2        | 2       | 2         | tier3 | shared           | 0                                   |
| 1   | 157079521       | 158812897      | A   | G   | 497            | 65             | 0.12          | 375           | 285           | 0.43         | 766             | 116             | 0.13           | 2        | 2       | 2         | tier2 | shared           | 1                                   |
| 1   | 170659983       | 172393360      | A   | G   | 432            | 71             | 0.14          | 350           | 252           | 0.42         | 616             | 105             | 0.15           | 2        | 2       | 2         | tier3 | shared           | 1                                   |
| 1   | 2047105         | 2057245        | A   | G   | 306            | 46             | 0.13          | 195           | 138           | 0.41         | 489             | 74              | 0.13           | 2        | 2       | 2         | tier3 | shared           | 0                                   |
| 1   | 232727616       | 234660993      | C   | G   | 334            | 67             | 0.17          | 247           | 191           | 0.44         | 493             | 99              | 0.17           | 2        | 2       | 2         | tier2 | shared           | 0                                   |
| 1   | 246890786       | 248824163      | T   | C   | 488            | 105            | 0.18          | 404           | 351           | 0.46         | 606             | 89              | 0.13           | 2        | 2       | 2         | tier3 | shared           | 0                                   |
| 1   | 26357620        | 26485033       | G   | A   | 346            | 65             | 0.16          | 244           | 206           | 0.46         | 594             | 82              | 0.12           | 2        | 2       | 2         | tier3 | shared           | 0                                   |
| 1   | 50546418        | 50773831       | C   | G   | 524            | 86             | 0.14          | 416           | 309           | 0.43         | 716             | 122             | 0.15           | 2        | 2       | 2         | tier3 | shared           | 0                                   |
| 1   | 68010042        | 68237454       | A   | T   | 274            | 63             | 0.19          | 239           | 192           | 0.45         | 461             | 76              | 0.14           | 2        | 2       | 2         | tier3 | shared           | 0                                   |
| 1   | 95228406        | 95455818       | G   | A   | 384            | 73             | 0.16          | 299           | 241           | 0.45         | 627             | 117             | 0.16           | 2        | 2       | 2         | tier2 | shared           | 0                                   |
| 1   | 97371514        | 97598926       | T   | C   | 160            | 19             | 0.11          | 114           | 115           | 0.50         | 187             | 29              | 0.13           | 2        | 2       | 2         | tier3 | shared           | 0                                   |
| 10  | 124028666       | 124038676      | G   | T   | 353            | 66             | 0.16          | 260           | 183           | 0.41         | 505             | 68              | 0.12           | 2        | 2       | 2         | tier3 | shared           | 1                                   |
| 10  | 128285031       | 128295041      | A   | C   | 575            | 0              | 0.00          | 572           | 0             | 0.00         | 607             | 63              | 0.09           | 2        | 2       | 2         | tier3 | relapse-specific | 0                                   |
| 10  | 131080284       | 131190294      | C   | A   | 279            | 39             | 0.12          | 215           | 158           | 0.42         | 473             | 79              | 0.14           | 2        | 2       | 2         | tier3 | shared           | 1                                   |
| 10  | 132586707       | 132696717      | C   | T   | 465            | 85             | 0.15          | 366           | 252           | 0.41         | 741             | 124             | 0.14           | 2        | 2       | 2         | tier3 | shared           | 1                                   |
| 10  | 42920506        | 43600500       | G   | T   | 262            | 53             | 0.17          | 174           | 132           | 0.43         | 375             | 61              | 0.14           | 2        | 2       | 2         | tier1 | shared           | 1                                   |
| 10  | 56298782        | 56628776       | C   | T   | 541            | 88             | 0.14          | 420           | 320           | 0.43         | 705             | 131             | 0.16           | 2        | 2       | 2         | tier3 | shared           | 1                                   |
| 10  | 72563148        | 72893142       | G   | A   | 382            | 53             | 0.12          | 327           | 217           | 0.40         | 701             | 113             | 0.14           | 2        | 2       | 2         | tier3 | shared           | 1                                   |
| 10  | 78837968        | 79167962       | C   | T   | 350            | 70             | 0.17          | 274           | 203           | 0.43         | 640             | 115             | 0.15           | 2        | 2       | 2         | tier3 | shared           | 2                                   |
| 10  | 82764687        | 82774707       | G   | T   | 454            | 72             | 0.14          | 347           | 237           | 0.41         | 552             | 76              | 0.12           | 2        | 2       | 2         | tier3 | shared           | 1                                   |
| 10  | 83666211        | 83676231       | T   | A   | 386            | 46             | 0.11          | 311           | 195           | 0.39         | 538             | 80              | 0.13           | 2        | 2       | 2         | tier3 | shared           | 1                                   |
| 10  | 84453341        | 84463361       | G   | A   | 600            | 0              | 0.00          | 632           | 0             | 0.00         | 783             | 92              | 0.11           | 2        | 2       | 2         | tier3 | relapse-specific | 1                                   |
| 10  | 84911614        | 84921634       | G   | A   | 569            | 72             | 0.11          | 490           | 360           | 0.42         | 766             | 144             | 0.16           | 2        | 2       | 2         | tier3 | shared           | 1                                   |
| 10  | 90685089        | 90695109       | C   | T   | 486            | 0              | 0.00          | 496           | 1             | 0.00         | 496             | 56              | 0.10           | 2        | 2       | 2         | tier1 | relapse-specific | 0                                   |
| 10  | 93750121        | 93760141       | G   | A   | 430            | 69             | 0.14          | 337           | 262           | 0.44         | 582             | 72              | 0.11           | 2        | 2       | 2         | tier3 | shared           | 0                                   |

|    |           |           |               |   |     |     |      |     |     |      |     |     |      |   |   |   |       |                  |   |
|----|-----------|-----------|---------------|---|-----|-----|------|-----|-----|------|-----|-----|------|---|---|---|-------|------------------|---|
| 11 | 108348426 | 108843216 | G             | A | 342 | 85  | 0.20 | 248 | 216 | 0.47 | 458 | 94  | 0.17 | 2 | 2 | 2 | tier3 | shared           | 0 |
| 11 | 114932108 | 115426898 | G             | A | 402 | 70  | 0.15 | 304 | 194 | 0.39 | 503 | 74  | 0.13 | 2 | 2 | 2 | tier3 | shared           | 1 |
| 11 | 126873995 | 127368785 | A             | C | 385 | 93  | 0.19 | 314 | 269 | 0.46 | 600 | 104 | 0.15 | 2 | 2 | 2 | tier3 | shared           | 1 |
| 11 | 133036355 | 133531145 | C             | T | 558 | 103 | 0.16 | 455 | 335 | 0.42 | 828 | 123 | 0.13 | 2 | 2 | 2 | tier3 | shared           | 1 |
| 11 | 14216860  | 14260284  | G             | T | 451 | 74  | 0.14 | 380 | 238 | 0.39 | 684 | 107 | 0.14 | 2 | 2 | 2 | tier3 | shared           | 1 |
| 11 | 81630181  | 81952533  | G             | A | 108 | 19  | 0.15 | 73  | 62  | 0.46 | 135 | 22  | 0.14 | 2 | 2 | 2 | tier3 | shared           | 1 |
| 11 | 88630487  | 88990839  | A             | C | 458 | 89  | 0.16 | 336 | 287 | 0.46 | 517 | 113 | 0.18 | 2 | 2 | 2 | tier3 | shared           | 0 |
| 11 | 88961314  | 89321666  | G             | A | 415 | 69  | 0.14 | 287 | 231 | 0.45 | 451 | 76  | 0.14 | 2 | 2 | 2 | tier3 | shared           | 1 |
| 11 | 98926049  | 99420839  | A             | G | 456 | 67  | 0.13 | 360 | 223 | 0.38 | 549 | 88  | 0.14 | 2 | 2 | 2 | tier3 | shared           | 2 |
| 12 | 104589528 | 106065398 | C             | T | 638 | 88  | 0.12 | 424 | 353 | 0.45 | 834 | 118 | 0.12 | 2 | 2 | 2 | tier2 | shared           | 1 |
| 12 | 130082682 | 131516729 | G             | A | 374 | 52  | 0.12 | 267 | 203 | 0.43 | 605 | 85  | 0.12 | 2 | 2 | 2 | tier3 | shared           | 0 |
| 12 | 13526038  | 13634771  | C             | T | 396 | 65  | 0.14 | 322 | 224 | 0.41 | 562 | 87  | 0.13 | 2 | 2 | 2 | tier2 | shared           | 0 |
| 12 | 2855556   | 2985295   | G             | C | 396 | 100 | 0.20 | 311 | 258 | 0.45 | 629 | 108 | 0.15 | 2 | 2 | 2 | tier3 | shared           | 1 |
| 12 | 44251466  | 45965199  | A             | G | 530 | 64  | 0.11 | 394 | 291 | 0.42 | 601 | 131 | 0.18 | 2 | 2 | 2 | tier3 | shared           | 1 |
| 12 | 5932819   | 6062558   | C             | T | 499 | 75  | 0.13 | 372 | 262 | 0.41 | 631 | 98  | 0.13 | 2 | 2 | 2 | tier3 | shared           | 2 |
| 12 | 61886315  | 63600048  | A             | G | 552 | 76  | 0.12 | 431 | 324 | 0.43 | 832 | 150 | 0.15 | 2 | 2 | 2 | tier2 | shared           | 1 |
| 13 | 24101719  | 25203719  | T             | C | 499 | 87  | 0.15 | 407 | 286 | 0.41 | 745 | 126 | 0.14 | 2 | 2 | 2 | tier3 | shared           | 0 |
| 13 | 27245431  | 28347431  | A             | G | 479 | 85  | 0.15 | 307 | 260 | 0.46 | 681 | 117 | 0.15 | 2 | 2 | 2 | tier3 | shared           | 0 |
| 13 | 49600060  | 50702059  | G             | A | 336 | 49  | 0.13 | 205 | 142 | 0.41 | 470 | 65  | 0.12 | 2 | 2 | 2 | tier2 | shared           | 0 |
| 13 | 57310496  | 58412495  | G             | T | 687 | 94  | 0.12 | 570 | 378 | 0.40 | 969 | 123 | 0.11 | 2 | 2 | 2 | tier3 | shared           | 0 |
| 13 | 60387178  | 61489177  | T             | C | 432 | 79  | 0.15 | 345 | 253 | 0.42 | 525 | 79  | 0.13 | 2 | 2 | 2 | tier3 | shared           | 1 |
| 13 | 86024201  | 87226200  | A             | T | 422 | 60  | 0.12 | 319 | 225 | 0.41 | 484 | 80  | 0.14 | 2 | 2 | 2 | tier2 | shared           | 1 |
| 14 | 28970786  | 29901035  | T             | C | 341 | 45  | 0.12 | 310 | 191 | 0.38 | 452 | 68  | 0.13 | 2 | 2 | 2 | tier3 | shared           | 0 |
| 14 | 31945736  | 32875985  | A             | G | 416 | 68  | 0.14 | 318 | 261 | 0.45 | 546 | 95  | 0.15 | 2 | 2 | 2 | tier3 | shared           | 0 |
| 14 | 35243261  | 36173510  | C             | G | 464 | 52  | 0.10 | 385 | 240 | 0.38 | 639 | 93  | 0.13 | 2 | 2 | 2 | tier3 | shared           | 0 |
| 14 | 60101057  | 61031304  | T             | A | 489 | 87  | 0.15 | 415 | 294 | 0.41 | 786 | 131 | 0.14 | 2 | 2 | 2 | tier3 | shared           | 0 |
| 14 | 71404121  | 72334368  | G             | A | 458 | 58  | 0.11 | 309 | 232 | 0.43 | 700 | 103 | 0.13 | 2 | 2 | 2 | tier3 | shared           | 1 |
| 14 | 81981587  | 82911834  | G             | A | 522 | 89  | 0.15 | 399 | 269 | 0.40 | 693 | 116 | 0.14 | 2 | 2 | 2 | tier3 | shared           | 0 |
| 14 | 99144574  | 100074821 | G             | A | 394 | 77  | 0.16 | 318 | 249 | 0.44 | 579 | 95  | 0.14 | 2 | 2 | 2 | tier3 | shared           | 0 |
| 15 | 27568855  | 29781563  | C             | T | 530 | 64  | 0.11 | 403 | 294 | 0.42 | 710 | 111 | 0.14 | 2 | 2 | 2 | tier3 | shared           | 1 |
| 15 | 50800477  | 53013185  | CGTCAGTAGACAA | - | 67  | 13  | 0.16 | 80  | 21  | 0.21 | 89  | 52  | 0.37 | 2 | 2 | 2 | tier3 | shared           | 0 |
| 15 | 84235152  | 86434148  | G             | A | 453 | 84  | 0.16 | 338 | 278 | 0.45 | 697 | 105 | 0.13 | 2 | 2 | 2 | tier3 | shared           | 1 |
| 15 | 94979771  | 97178767  | G             | A | 368 | 64  | 0.15 | 325 | 239 | 0.42 | 543 | 95  | 0.15 | 2 | 2 | 2 | tier3 | shared           | 1 |
| 16 | 27557842  | 27650341  | A             | T | 487 | 100 | 0.17 | 351 | 307 | 0.47 | 755 | 127 | 0.14 | 2 | 2 | 2 | tier3 | shared           | 0 |
| 16 | 48157810  | 49600309  | G             | A | 199 | 30  | 0.13 | 151 | 86  | 0.36 | 350 | 55  | 0.14 | 2 | 2 | 2 | tier2 | shared           | 0 |
| 16 | 61747374  | 63189873  | T             | G | 521 | 0   | 0.00 | 666 | 0   | 0.00 | 694 | 68  | 0.09 | 2 | 2 | 2 | tier3 | relapse-specific | 1 |
| 16 | 62989048  | 64431547  | G             | T | 399 | 2   | 0.00 | 513 | 2   | 0.00 | 474 | 41  | 0.08 | 2 | 2 | 2 | tier2 | relapse-specific | 1 |
| 16 | 63862579  | 65305078  | G             | A | 321 | 83  | 0.21 | 301 | 251 | 0.45 | 494 | 100 | 0.17 | 2 | 2 | 2 | tier3 | shared           | 0 |
| 16 | 75786717  | 77229216  | G             | A | 368 | 48  | 0.12 | 290 | 181 | 0.38 | 623 | 86  | 0.12 | 2 | 2 | 2 | tier3 | shared           | 0 |
| 17 | 11469777  | 11529052  | C             | T | 431 | 88  | 0.17 | 330 | 276 | 0.46 | 625 | 96  | 0.13 | 2 | 2 | 2 | tier3 | shared           | 5 |

|    |           |           |   |   |     |    |      |     |     |      |     |     |      |   |     |      |       |                  |   |
|----|-----------|-----------|---|---|-----|----|------|-----|-----|------|-----|-----|------|---|-----|------|-------|------------------|---|
| 17 | 22045352  | 22121225  | T | A | 197 | 0  | 0.00 | 192 | 0   | 0.00 | 180 | 17  | 0.09 | 2 | 2   | 2    | tier3 | relapse-specific | 1 |
| 17 | 45384285  | 48029286  | G | A | 232 | 27 | 0.10 | 154 | 77  | 0.33 | 313 | 60  | 0.16 | 2 | 2   | 2    | tier2 | shared           | 0 |
| 17 | 74901938  | 77390343  | C | T | 407 | 75 | 0.16 | 361 | 195 | 0.35 | 795 | 90  | 0.10 | 2 | 2   | 2    | tier3 | shared           | 0 |
| 18 | 4240996   | 4250996   | A | G | 329 | 49 | 0.13 | 242 | 167 | 0.41 | 502 | 79  | 0.14 | 2 | 2   | 2    | tier3 | shared           | 0 |
| 18 | 42887822  | 44633824  | G | C | 639 | 0  | 0.00 | 831 | 0   | 0.00 | 894 | 58  | 0.06 | 2 | 2   | 2    | tier3 | relapse-specific | 0 |
| 18 | 49631152  | 51377154  | A | T | 184 | 22 | 0.11 | 122 | 89  | 0.42 | 268 | 49  | 0.15 | 2 | 2   | 2    | tier3 | shared           | 1 |
| 18 | 74358793  | 76257805  | C | T | 230 | 27 | 0.11 | 198 | 121 | 0.38 | 397 | 53  | 0.12 | 2 | 2   | 2    | tier2 | shared           | 0 |
| 19 | 9190702   | 9329702   | T | G | 325 | 50 | 0.13 | 250 | 165 | 0.40 | 452 | 80  | 0.15 | 2 | 2   | 2    | tier3 | shared           | 0 |
| 2  | 1119223   | 1129223   | T | G | 565 | 0  | 0.00 | 727 | 0   | 0.00 | 776 | 83  | 0.10 | 2 | 2   | 2    | tier3 | relapse-specific | 0 |
| 2  | 120945152 | 121228682 | C | T | 505 | 83 | 0.14 | 357 | 281 | 0.44 | 750 | 129 | 0.15 | 2 | 2   | 2    | tier2 | shared           | 1 |
| 2  | 132308722 | 132592252 | A | G | 237 | 53 | 0.18 | 160 | 115 | 0.42 | 334 | 69  | 0.17 | 2 | 1.2 | 1.35 | tier3 | shared           | 0 |
| 2  | 177039562 | 177331316 | G | T | 422 | 70 | 0.14 | 364 | 204 | 0.36 | 684 | 111 | 0.14 | 2 | 2   | 2    | tier3 | shared           | 1 |
| 2  | 1780321   | 1801314   | G | A | 467 | 76 | 0.14 | 361 | 215 | 0.37 | 613 | 105 | 0.15 | 2 | 2   | 2    | tier2 | shared           | 0 |
| 2  | 185954519 | 186246274 | A | G | 395 | 64 | 0.14 | 326 | 215 | 0.40 | 499 | 70  | 0.12 | 2 | 2   | 2    | tier3 | shared           | 1 |
| 2  | 226037120 | 226328876 | T | C | 444 | 69 | 0.13 | 363 | 247 | 0.40 | 695 | 122 | 0.15 | 2 | 2   | 2    | tier3 | shared           | 0 |
| 2  | 80360257  | 80506746  | C | T | 414 | 55 | 0.12 | 333 | 230 | 0.41 | 512 | 88  | 0.15 | 2 | 2   | 2    | tier3 | shared           | 1 |
| 2  | 84363515  | 84510004  | G | A | 337 | 39 | 0.10 | 230 | 151 | 0.40 | 464 | 93  | 0.17 | 2 | 2   | 2    | tier2 | shared           | 0 |
| 2  | 9847540   | 9930089   | C | T | 295 | 64 | 0.18 | 237 | 194 | 0.45 | 462 | 92  | 0.17 | 2 | 2   | 2    | tier2 | shared           | 0 |
| 20 | 21151872  | 21203872  | A | G | 428 | 65 | 0.13 | 292 | 231 | 0.44 | 545 | 72  | 0.12 | 2 | 2   | 2    | tier3 | shared           | 0 |
| 20 | 50693129  | 51259722  | C | A | 431 | 70 | 0.14 | 340 | 302 | 0.47 | 652 | 115 | 0.15 | 2 | 2   | 2    | tier3 | shared           | 0 |
| 20 | 50997947  | 51564540  | C | A | 120 | 21 | 0.15 | 100 | 80  | 0.44 | 137 | 22  | 0.14 | 2 | 2   | 2    | tier3 | shared           | 0 |
| 20 | 7083263   | 7135263   | T | C | 342 | 64 | 0.16 | 260 | 230 | 0.47 | 435 | 69  | 0.14 | 2 | 2   | 2    | tier3 | shared           | 1 |
| 20 | 9688020   | 9740020   | A | G | 521 | 71 | 0.12 | 399 | 330 | 0.45 | 726 | 120 | 0.14 | 2 | 2   | 2    | tier3 | shared           | 0 |
| 21 | 23407971  | 24486100  | G | A | 415 | 95 | 0.19 | 346 | 241 | 0.41 | 605 | 83  | 0.12 | 2 | 2   | 2    | tier3 | shared           | 0 |
| 22 | 34566545  | 36236599  | C | T | 133 | 20 | 0.13 | 116 | 90  | 0.44 | 176 | 28  | 0.14 | 2 | 2   | 2    | tier2 | shared           | 1 |
| 22 | 46051725  | 47673061  | C | T | 294 | 41 | 0.12 | 230 | 178 | 0.44 | 509 | 76  | 0.13 | 2 | 2   | 2    | tier3 | shared           | 1 |
| 22 | 48636061  | 50250057  | A | G | 388 | 51 | 0.12 | 308 | 208 | 0.40 | 614 | 102 | 0.14 | 2 | 2   | 2    | tier2 | shared           | 1 |
| 3  | 160308918 | 158826224 | T | A | 390 | 77 | 0.16 | 319 | 240 | 0.43 | 484 | 71  | 0.13 | 2 | 2   | 2    | tier2 | shared           | 0 |
| 3  | 162939745 | 161457051 | G | A | 449 | 66 | 0.13 | 341 | 184 | 0.35 | 580 | 83  | 0.13 | 2 | 2   | 2    | tier3 | shared           | 1 |
| 3  | 183065520 | 181582826 | C | G | 465 | 0  | 0.00 | 610 | 1   | 0.00 | 619 | 46  | 0.07 | 2 | 2   | 2    | tier3 | relapse-specific | 0 |
| 3  | 1897326   | 1922326   | G | A | 446 | 70 | 0.14 | 333 | 223 | 0.40 | 620 | 89  | 0.13 | 2 | 2   | 2    | tier3 | shared           | 0 |
| 3  | 22074772  | 22099768  | T | C | 376 | 49 | 0.12 | 296 | 202 | 0.41 | 499 | 81  | 0.14 | 2 | 2   | 2    | tier3 | shared           | 1 |
| 3  | 38494675  | 38519671  | C | T | 321 | 38 | 0.11 | 214 | 160 | 0.43 | 460 | 78  | 0.14 | 2 | 2   | 2    | tier1 | shared           | 1 |
| 3  | 38926801  | 38951797  | C | T | 468 | 87 | 0.16 | 374 | 257 | 0.41 | 597 | 99  | 0.14 | 2 | 2   | 2    | tier2 | shared           | 0 |
| 3  | 52815055  | 52840015  | C | T | 209 | 45 | 0.18 | 165 | 130 | 0.44 | 337 | 64  | 0.16 | 2 | 2   | 2    | tier3 | shared           | 0 |
| 3  | 72131662  | 72048972  | T | A | 532 | 79 | 0.13 | 421 | 271 | 0.39 | 723 | 106 | 0.13 | 2 | 2   | 2    | tier2 | shared           | 1 |
| 3  | 8381350   | 8406350   | A | G | 331 | 51 | 0.13 | 256 | 161 | 0.39 | 417 | 70  | 0.14 | 2 | 2   | 2    | tier3 | shared           | 0 |
| 4  | 156523033 | 156303583 | C | T | 320 | 63 | 0.16 | 226 | 174 | 0.44 | 468 | 95  | 0.17 | 2 | 2   | 2    | tier2 | shared           | 0 |
| 4  | 162187617 | 161968167 | G | A | 518 | 70 | 0.12 | 389 | 325 | 0.46 | 630 | 105 | 0.14 | 2 | 2   | 2    | tier2 | shared           | 0 |
| 4  | 175013857 | 174777282 | G | A | 371 | 76 | 0.17 | 305 | 256 | 0.46 | 497 | 78  | 0.14 | 2 | 2   | 2    | tier2 | shared           | 1 |



|   |           |           |   |      |     |     |      |     |     |      |     |     |      |   |   |   |       |                  |    |
|---|-----------|-----------|---|------|-----|-----|------|-----|-----|------|-----|-----|------|---|---|---|-------|------------------|----|
| 4 | 185168709 | 184931715 | C | G    | 405 | 1   | 0.00 | 482 | 0   | 0.00 | 570 | 65  | 0.10 | 2 | 2 | 2 | tier1 | relapse-specific | 0  |
| 4 | 27805501  | 28196403  | T | C    | 600 | 81  | 0.12 | 554 | 239 | 0.30 | 743 | 84  | 0.10 | 2 | 2 | 2 | tier3 | shared           | 1  |
| 4 | 31876103  | 32232205  | T | C    | 368 | 60  | 0.14 | 248 | 212 | 0.46 | 516 | 97  | 0.16 | 2 | 2 | 2 | tier3 | shared           | 0  |
| 4 | 46928184  | 47233427  | T | C    | 570 | 99  | 0.15 | 470 | 329 | 0.41 | 672 | 104 | 0.13 | 2 | 2 | 2 | tier3 | shared           | 1  |
| 4 | 5560977   | 5510076   | A | G    | 445 | 68  | 0.13 | 327 | 249 | 0.43 | 703 | 105 | 0.13 | 2 | 2 | 2 | tier3 | shared           | 0  |
| 4 | 60624348  | 60941753  | T | C    | 467 | 106 | 0.18 | 358 | 280 | 0.44 | 685 | 95  | 0.12 | 2 | 2 | 2 | tier3 | shared           | 1  |
| 4 | 7221259   | 7170358   | G | A    | 337 | 60  | 0.15 | 269 | 193 | 0.42 | 560 | 84  | 0.13 | 2 | 2 | 2 | tier3 | shared           | 0  |
| 5 | 1297678   | 1244678   | A | G    | 318 | 56  | 0.15 | 204 | 188 | 0.48 | 500 | 100 | 0.17 | 2 | 2 | 2 | tier3 | shared           | 0  |
| 5 | 15576863  | 15523863  | G | A    | 520 | 67  | 0.11 | 348 | 250 | 0.42 | 704 | 112 | 0.14 | 2 | 2 | 2 | tier3 | shared           | 1  |
| 5 | 162177435 | 162244857 | G | A    | 453 | 0   | 0.00 | 625 | 1   | 0.00 | 629 | 80  | 0.11 | 2 | 2 | 2 | tier3 | relapse-specific | 0  |
| 5 | 170770148 | 170837543 | - | TCTG | 166 | 27  | 0.14 | 129 | 67  | 0.34 | 177 | 18  | 0.09 | 2 | 2 | 2 | tier1 | shared           | 55 |
| 5 | 17555650  | 17502650  | C | T    | 580 | 72  | 0.11 | 480 | 185 | 0.28 | 884 | 109 | 0.11 | 2 | 2 | 2 | tier3 | shared           | 0  |
| 5 | 41469819  | 41434062  | C | T    | 473 | 88  | 0.16 | 348 | 273 | 0.44 | 692 | 103 | 0.13 | 2 | 2 | 2 | tier2 | shared           | 0  |
| 5 | 5040012   | 4987012   | G | A    | 264 | 52  | 0.16 | 265 | 167 | 0.39 | 365 | 70  | 0.16 | 2 | 2 | 2 | tier2 | shared           | 1  |
| 5 | 59661304  | 59625547  | T | C    | 434 | 52  | 0.11 | 340 | 239 | 0.41 | 597 | 108 | 0.15 | 2 | 2 | 2 | tier2 | shared           | 0  |
| 5 | 81433358  | 81397602  | A | G    | 463 | 72  | 0.13 | 361 | 240 | 0.40 | 562 | 108 | 0.16 | 2 | 2 | 2 | tier2 | shared           | 0  |
| 6 | 102924538 | 102817845 | G | A    | 480 | 77  | 0.14 | 375 | 282 | 0.43 | 735 | 122 | 0.14 | 2 | 2 | 2 | tier3 | shared           | 1  |
| 6 | 70909420  | 70852699  | C | T    | 542 | 68  | 0.11 | 376 | 253 | 0.40 | 699 | 131 | 0.16 | 2 | 2 | 2 | tier1 | shared           | 1  |
| 6 | 73006165  | 72949444  | C | T    | 514 | 92  | 0.15 | 394 | 321 | 0.45 | 763 | 130 | 0.15 | 2 | 2 | 2 | tier2 | shared           | 2  |
| 6 | 93462438  | 93405717  | G | A    | 384 | 0   | 0.00 | 481 | 1   | 0.00 | 368 | 43  | 0.10 | 2 | 2 | 2 | tier3 | relapse-specific | 1  |
| 7 | 1129516   | 1162990   | G | A    | 233 | 25  | 0.10 | 176 | 117 | 0.40 | 375 | 66  | 0.15 | 2 | 2 | 2 | tier2 | shared           | 0  |
| 7 | 126904338 | 127117102 | C | T    | 399 | 54  | 0.12 | 300 | 208 | 0.41 | 495 | 89  | 0.15 | 2 | 2 | 2 | tier3 | shared           | 1  |
| 7 | 137742937 | 138092397 | A | G    | 538 | 79  | 0.13 | 376 | 283 | 0.43 | 646 | 108 | 0.14 | 2 | 2 | 2 | tier3 | shared           | 0  |
| 7 | 27335064  | 27368539  | C | A    | 248 | 42  | 0.14 | 184 | 155 | 0.46 | 404 | 80  | 0.17 | 2 | 2 | 2 | tier2 | shared           | 0  |
| 7 | 9411942   | 9445417   | C | T    | 353 | 46  | 0.12 | 254 | 178 | 0.41 | 489 | 74  | 0.13 | 2 | 2 | 2 | tier3 | shared           | 1  |
| 8 | 3293986   | 3306578   | G | A    | 538 | 0   | 0.00 | 718 | 0   | 0.00 | 740 | 83  | 0.10 | 2 | 2 | 2 | tier3 | relapse-specific | 5  |
| 8 | 35385446  | 35265904  | C | T    | 526 | 87  | 0.14 | 410 | 257 | 0.39 | 686 | 113 | 0.14 | 2 | 2 | 2 | tier3 | shared           | 1  |
| 8 | 4506706   | 4519298   | G | A    | 573 | 98  | 0.15 | 468 | 331 | 0.41 | 734 | 112 | 0.13 | 2 | 2 | 2 | tier3 | shared           | 5  |
| 8 | 69990778  | 69828224  | C | A    | 637 | 2   | 0.00 | 651 | 0   | 0.00 | 739 | 74  | 0.09 | 2 | 2 | 2 | tier3 | relapse-specific | 1  |
| 8 | 72014233  | 71851679  | G | C    | 613 | 123 | 0.17 | 453 | 369 | 0.45 | 749 | 100 | 0.12 | 2 | 2 | 2 | tier2 | shared           | 1  |
| 8 | 73668443  | 73505889  | T | G    | 523 | 89  | 0.15 | 423 | 293 | 0.41 | 882 | 132 | 0.13 | 2 | 2 | 2 | tier2 | shared           | 0  |
| 8 | 90168004  | 90098888  | C | T    | 392 | 65  | 0.14 | 345 | 220 | 0.39 | 596 | 85  | 0.12 | 2 | 2 | 2 | tier3 | shared           | 1  |
| 9 | 108822289 | 109782468 | T | C    | 576 | 95  | 0.14 | 519 | 366 | 0.41 | 927 | 158 | 0.15 | 2 | 2 | 2 | tier2 | shared           | 0  |
| 9 | 128606555 | 129566734 | C | T    | 399 | 62  | 0.13 | 314 | 223 | 0.42 | 594 | 99  | 0.14 | 2 | 2 | 2 | tier3 | shared           | 0  |
| 9 | 133385754 | 134395933 | G | A    | 464 | 75  | 0.14 | 341 | 274 | 0.45 | 709 | 114 | 0.14 | 2 | 2 | 2 | tier3 | shared           | 0  |
| 9 | 133675566 | 134685745 | T | C    | 552 | 67  | 0.11 | 343 | 236 | 0.41 | 760 | 126 | 0.14 | 2 | 2 | 2 | tier3 | shared           | 0  |
| 9 | 18413175  | 18423175  | T | G    | 440 | 52  | 0.11 | 317 | 230 | 0.42 | 512 | 67  | 0.12 | 2 | 2 | 2 | tier2 | shared           | 1  |
| 9 | 80646169  | 81456349  | C | T    | 402 | 58  | 0.13 | 324 | 211 | 0.39 | 475 | 71  | 0.13 | 2 | 2 | 2 | tier3 | shared           | 1  |
| 9 | 88474278  | 89284458  | G | A    | 436 | 74  | 0.15 | 334 | 214 | 0.39 | 624 | 92  | 0.13 | 2 | 2 | 2 | tier3 | shared           | 1  |
| X | 121434334 | 121606653 | G | A    | 510 | 2   | 0.00 | 603 | 2   | 0.00 | 723 | 55  | 0.07 | 2 | 2 | 2 | tier3 | relapse-specific | 0  |

|   |           |           |   |   |     |     |      |     |     |      |     |     |      |   |   |   |       |        |   |
|---|-----------|-----------|---|---|-----|-----|------|-----|-----|------|-----|-----|------|---|---|---|-------|--------|---|
| X | 152730397 | 153077203 | C | T | 470 | 95  | 0.17 | 336 | 282 | 0.46 | 544 | 101 | 0.16 | 2 | 2 | 2 | tier3 | shared | 0 |
| X | 37907322  | 38022378  | T | A | 539 | 110 | 0.17 | 399 | 320 | 0.45 | 713 | 121 | 0.15 | 2 | 2 | 2 | tier3 | shared | 1 |
| X | 55700094  | 55683369  | G | A | 285 | 36  | 0.11 | 186 | 156 | 0.46 | 392 | 82  | 0.17 | 2 | 2 | 2 | tier1 | shared | 1 |

---

**Supplementary Table 6e.** Somatic point mutations and indels from UPN 758168 tumor-relapse pair used for mutation spectrum and clonality analyses. Mutations identified in the relapse sample with <2% allele frequencies in the primary tumor were classified as relapse-specific.

| Chr | Start (NCBI 36) | Start (GRCh37) | Ref | Var | NormalRefReads | NormalVarReads | NormalVarFreq | TumorRefReads | TumorVarReads | TumorVarFreq | RelapseRefReads | RelapseVarReads | RelapseVarFreq | NormalCN | TumorCN | RelapseCN | Tier  | Classification   | # of samples recurrent (out of 200) |
|-----|-----------------|----------------|-----|-----|----------------|----------------|---------------|---------------|---------------|--------------|-----------------|-----------------|----------------|----------|---------|-----------|-------|------------------|-------------------------------------|
| 1   | 101795228       | 102022640      | C   | T   | 429            | 27             | 0.06          | 299           | 252           | 0.46         | 285             | 242             | 0.46           | 2        | 2       | 2         | tier3 | shared           | 1                                   |
| 1   | 108075256       | 108273733      | C   | T   | 655            | 42             | 0.06          | 351           | 273           | 0.44         | 340             | 255             | 0.43           | 2        | 2       | 2         | tier3 | shared           | 1                                   |
| 1   | 112186324       | 112384801      | C   | T   | 273            | 24             | 0.08          | 205           | 161           | 0.44         | 284             | 92              | 0.24           | 2        | 2       | 2         | tier3 | shared           | 0                                   |
| 1   | 113359631       | 113558108      | A   | G   | 201            | 19             | 0.09          | 131           | 72            | 0.35         | 143             | 117             | 0.45           | 2        | 2       | 2         | tier3 | shared           | 1                                   |
| 1   | 144426616       | 145715259      | A   | G   | 478            | 37             | 0.07          | 312           | 255           | 0.45         | 359             | 269             | 0.43           | 2        | 2       | 2         | tier3 | shared           | 0                                   |
| 1   | 145272658       | 146806034      | T   | C   | 478            | 34             | 0.07          | 256           | 264           | 0.51         | 289             | 266             | 0.48           | 2        | 2       | 2         | tier3 | shared           | 0                                   |
| 1   | 157535832       | 159269208      | C   | T   | 462            | 35             | 0.07          | 314           | 277           | 0.47         | 339             | 276             | 0.45           | 2        | 2       | 2         | tier3 | shared           | 0                                   |
| 1   | 161210083       | 162943459      | C   | T   | 598            | 47             | 0.07          | 349           | 281           | 0.45         | 378             | 256             | 0.40           | 2        | 2       | 2         | tier3 | shared           | 0                                   |
| 1   | 162652104       | 164385480      | C   | A   | 635            | 0              | 0.00          | 555           | 0             | 0.00         | 421             | 59              | 0.12           | 2        | 2       | 2         | tier3 | relapse-specific | 1                                   |
| 1   | 162672026       | 164405402      | C   | T   | 248            | 17             | 0.06          | 142           | 139           | 0.49         | 134             | 116             | 0.46           | 2        | 2       | 2         | tier3 | shared           | 1                                   |
| 1   | 176722320       | 178455697      | C   | G   | 393            | 29             | 0.07          | 280           | 217           | 0.44         | 412             | 138             | 0.25           | 2        | 2       | 2         | tier2 | shared           | 0                                   |
| 1   | 182681055       | 184414432      | T   | G   | 352            | 23             | 0.06          | 165           | 145           | 0.47         | 171             | 135             | 0.44           | 2        | 2       | 2         | tier3 | shared           | 0                                   |
| 1   | 193708003       | 195441380      | G   | A   | 752            | 0              | 0.00          | 708           | 0             | 0.00         | 544             | 135             | 0.20           | 2        | 2       | 2         | tier3 | relapse-specific | 1                                   |
| 1   | 193987679       | 195721056      | G   | T   | 433            | 0              | 0.00          | 371           | 0             | 0.00         | 322             | 64              | 0.17           | 2        | 2       | 2         | tier3 | relapse-specific | 1                                   |
| 1   | 207565242       | 209498619      | G   | T   | 585            | 57             | 0.09          | 447           | 363           | 0.45         | 429             | 349             | 0.45           | 2        | 2       | 2         | tier2 | shared           | 1                                   |
| 1   | 209006734       | 210940111      | C   | T   | 755            | 1              | 0.00          | 659           | 0             | 0.00         | 512             | 112             | 0.18           | 2        | 2       | 2         | tier3 | relapse-specific | 0                                   |
| 1   | 213699271       | 215632648      | T   | -   | 440            | 43             | 0.09          | 360           | 293           | 0.45         | 344             | 297             | 0.46           | 2        | 2       | 2         | tier3 | shared           | 1                                   |
| 1   | 213872512       | 215805889      | C   | T   | 609            | 69             | 0.10          | 391           | 342           | 0.47         | 434             | 328             | 0.43           | 2        | 2       | 2         | tier3 | shared           | 2                                   |
| 1   | 227069729       | 229003106      | G   | A   | 374            | 25             | 0.06          | 257           | 232           | 0.47         | 236             | 194             | 0.45           | 2        | 2       | 2         | tier3 | shared           | 1                                   |
| 1   | 227086932       | 229020309      | T   | C   | 656            | 52             | 0.07          | 328           | 257           | 0.44         | 355             | 334             | 0.48           | 2        | 2       | 2         | tier3 | shared           | 1                                   |
| 1   | 230816646       | 232750023      | A   | T   | 535            | 0              | 0.00          | 633           | 0             | 0.00         | 526             | 105             | 0.17           | 2        | 2       | 2         | tier3 | relapse-specific | 0                                   |
| 1   | 30582076        | 30809489       | C   | T   | 530            | 49             | 0.08          | 383           | 358           | 0.48         | 391             | 327             | 0.46           | 2        | 2       | 2         | tier3 | shared           | 0                                   |
| 1   | 36221858        | 36449271       | C   | G   | 812            | 60             | 0.07          | 457           | 471           | 0.51         | 448             | 341             | 0.43           | 2        | 2       | 2         | tier3 | shared           | 0                                   |
| 1   | 44944905        | 45172318       | G   | A   | 694            | 0              | 0.00          | 735           | 0             | 0.00         | 616             | 129             | 0.17           | 2        | 2       | 2         | tier3 | relapse-specific | 0                                   |
| 1   | 47682290        | 47909703       | C   | T   | 102            | 8              | 0.07          | 70            | 52            | 0.43         | 98              | 94              | 0.49           | 2        | 2       | 2         | tier2 | shared           | 0                                   |
| 1   | 49985351        | 50212764       | T   | C   | 586            | 43             | 0.07          | 344           | 305           | 0.47         | 333             | 304             | 0.48           | 2        | 2       | 2         | tier2 | shared           | 0                                   |
| 1   | 56758799        | 56986211       | G   | A   | 508            | 1              | 0.00          | 514           | 1             | 0.00         | 424             | 87              | 0.17           | 2        | 2       | 2         | tier3 | relapse-specific | 0                                   |
| 1   | 62329867        | 62557279       | T   | C   | 665            | 0              | 0.00          | 582           | 0             | 0.00         | 629             | 44              | 0.07           | 2        | 2       | 2         | tier3 | relapse-specific | 1                                   |
| 1   | 65105070        | 65332482       | -   | G   | 529            | 33             | 0.06          | 347           | 248           | 0.42         | 323             | 263             | 0.45           | 2        | 2       | 2         | tier3 | shared           | 0                                   |

|    |           |           |   |   |     |    |      |     |     |      |     |     |      |   |   |   |       |                  |   |
|----|-----------|-----------|---|---|-----|----|------|-----|-----|------|-----|-----|------|---|---|---|-------|------------------|---|
| 1  | 73654309  | 73881721  | T | A | 416 | 28 | 0.06 | 235 | 187 | 0.44 | 263 | 204 | 0.44 | 2 | 2 | 2 | tier3 | shared           | 1 |
| 1  | 7784722   | 7862135   | T | C | 354 | 18 | 0.05 | 155 | 147 | 0.49 | 174 | 144 | 0.45 | 2 | 2 | 2 | tier3 | shared           | 0 |
| 1  | 79695278  | 79922690  | A | G | 558 | 44 | 0.07 | 369 | 291 | 0.44 | 353 | 270 | 0.43 | 2 | 2 | 2 | tier3 | shared           | 1 |
| 1  | 79793941  | 80021353  | A | T | 572 | 45 | 0.07 | 305 | 256 | 0.46 | 335 | 292 | 0.47 | 2 | 2 | 2 | tier3 | shared           | 0 |
| 1  | 80186452  | 80413864  | A | T | 326 | 0  | 0.00 | 322 | 1   | 0.00 | 261 | 56  | 0.18 | 2 | 2 | 2 | tier3 | relapse-specific | 1 |
| 1  | 90765265  | 90992677  | G | T | 498 | 56 | 0.10 | 357 | 318 | 0.47 | 321 | 290 | 0.47 | 2 | 2 | 2 | tier3 | shared           | 1 |
| 1  | 9292525   | 9369938   | G | C | 430 | 33 | 0.07 | 291 | 202 | 0.41 | 286 | 226 | 0.44 | 2 | 2 | 2 | tier3 | shared           | 0 |
| 10 | 101883080 | 101893090 | A | C | 480 | 40 | 0.08 | 318 | 245 | 0.44 | 301 | 244 | 0.45 | 2 | 2 | 2 | tier3 | shared           | 0 |
| 10 | 107559315 | 107569325 | G | - | 618 | 48 | 0.07 | 332 | 277 | 0.45 | 341 | 239 | 0.41 | 2 | 2 | 2 | tier3 | shared           | 1 |
| 10 | 122985405 | 122995415 | C | G | 617 | 71 | 0.10 | 391 | 296 | 0.43 | 581 | 210 | 0.27 | 2 | 2 | 2 | tier3 | shared           | 0 |
| 10 | 125962311 | 125972321 | C | T | 490 | 30 | 0.06 | 304 | 263 | 0.46 | 330 | 252 | 0.43 | 2 | 2 | 2 | tier3 | shared           | 1 |
| 10 | 132611796 | 132721806 | G | A | 607 | 61 | 0.09 | 398 | 349 | 0.47 | 406 | 324 | 0.44 | 2 | 2 | 2 | tier3 | shared           | 1 |
| 10 | 133034167 | 133144177 | G | A | 335 | 14 | 0.04 | 212 | 164 | 0.44 | 235 | 222 | 0.49 | 2 | 2 | 2 | tier3 | shared           | 1 |
| 10 | 14102630  | 14062624  | C | T | 356 | 39 | 0.10 | 284 | 210 | 0.43 | 280 | 239 | 0.46 | 2 | 2 | 2 | tier2 | shared           | 0 |
| 10 | 16181275  | 16141269  | A | C | 400 | 38 | 0.09 | 286 | 272 | 0.49 | 268 | 268 | 0.50 | 2 | 2 | 2 | tier3 | shared           | 0 |
| 10 | 2824791   | 2834791   | A | G | 577 | 44 | 0.07 | 319 | 287 | 0.47 | 339 | 274 | 0.45 | 2 | 2 | 2 | tier3 | shared           | 1 |
| 10 | 29873202  | 29833196  | G | A | 537 | 41 | 0.07 | 308 | 244 | 0.44 | 318 | 245 | 0.44 | 2 | 2 | 2 | tier3 | shared           | 0 |
| 10 | 30326889  | 30286883  | G | A | 621 | 47 | 0.07 | 359 | 242 | 0.40 | 328 | 252 | 0.43 | 2 | 2 | 2 | tier2 | shared           | 0 |
| 10 | 34059045  | 34019039  | G | A | 586 | 48 | 0.08 | 314 | 251 | 0.44 | 335 | 259 | 0.44 | 2 | 2 | 2 | tier3 | shared           | 1 |
| 10 | 37500984  | 37460978  | A | G | 971 | 22 | 0.02 | 698 | 138 | 0.17 | 704 | 138 | 0.16 | 2 | 2 | 2 | tier3 | shared           | 1 |
| 10 | 3797379   | 3807379   | C | A | 478 | 35 | 0.07 | 311 | 267 | 0.46 | 311 | 258 | 0.45 | 2 | 2 | 2 | tier2 | shared           | 0 |
| 10 | 44603059  | 45283053  | G | C | 748 | 19 | 0.02 | 647 | 151 | 0.19 | 713 | 91  | 0.11 | 2 | 2 | 2 | tier3 | shared           | 0 |
| 10 | 52502567  | 52832561  | A | C | 339 | 0  | 0.00 | 321 | 0   | 0.00 | 302 | 55  | 0.15 | 2 | 2 | 2 | tier3 | relapse-specific | 0 |
| 10 | 55997651  | 56327645  | A | G | 465 | 0  | 0.00 | 486 | 0   | 0.00 | 355 | 74  | 0.17 | 2 | 2 | 2 | tier3 | relapse-specific | 1 |
| 10 | 56392820  | 56722814  | A | T | 424 | 0  | 0.00 | 444 | 0   | 0.00 | 408 | 79  | 0.16 | 2 | 2 | 2 | tier2 | relapse-specific | 1 |
| 10 | 56477658  | 56807652  | G | T | 466 | 31 | 0.06 | 262 | 179 | 0.41 | 304 | 93  | 0.23 | 2 | 2 | 2 | tier3 | shared           | 1 |
| 10 | 58036972  | 58366966  | C | A | 431 | 32 | 0.07 | 278 | 187 | 0.40 | 276 | 186 | 0.40 | 2 | 2 | 2 | tier3 | shared           | 1 |
| 10 | 67368173  | 67698167  | A | - | 637 | 51 | 0.07 | 332 | 303 | 0.48 | 370 | 275 | 0.43 | 2 | 2 | 2 | tier3 | shared           | 1 |
| 10 | 68276865  | 68606859  | C | G | 548 | 40 | 0.07 | 384 | 273 | 0.42 | 361 | 259 | 0.42 | 2 | 2 | 2 | tier3 | shared           | 1 |
| 10 | 71282909  | 71612903  | T | A | 132 | 13 | 0.09 | 80  | 67  | 0.46 | 122 | 81  | 0.40 | 2 | 2 | 2 | tier3 | shared           | 0 |
| 10 | 74551292  | 74881286  | C | T | 495 | 38 | 0.07 | 381 | 250 | 0.40 | 390 | 274 | 0.41 | 2 | 2 | 2 | tier3 | shared           | 0 |
| 10 | 82964741  | 82974761  | T | - | 252 | 39 | 0.13 | 166 | 110 | 0.40 | 181 | 141 | 0.44 | 2 | 2 | 2 | tier3 | shared           | 1 |
| 10 | 84719564  | 84729584  | G | A | 611 | 0  | 0.00 | 633 | 2   | 0.00 | 467 | 134 | 0.22 | 2 | 2 | 2 | tier2 | relapse-specific | 1 |
| 10 | 8605762   | 8565756   | C | T | 574 | 46 | 0.07 | 386 | 271 | 0.41 | 469 | 153 | 0.25 | 2 | 2 | 2 | tier3 | shared           | 0 |
| 10 | 86645712  | 86655732  | T | G | 253 | 13 | 0.05 | 114 | 142 | 0.55 | 129 | 127 | 0.50 | 2 | 2 | 2 | tier3 | shared           | 1 |
| 10 | 88479977  | 88489997  | A | G | 524 | 44 | 0.08 | 354 | 279 | 0.44 | 382 | 341 | 0.47 | 2 | 2 | 2 | tier3 | shared           | 0 |
| 10 | 91676896  | 91686916  | G | A | 325 | 18 | 0.05 | 230 | 170 | 0.43 | 210 | 206 | 0.50 | 2 | 2 | 2 | tier2 | shared           | 1 |
| 11 | 103263588 | 103758378 | G | T | 589 | 41 | 0.07 | 405 | 290 | 0.42 | 470 | 197 | 0.30 | 2 | 2 | 2 | tier3 | shared           | 0 |
| 11 | 10641809  | 10685233  | T | G | 538 | 87 | 0.14 | 46  | 495 | 0.91 | 61  | 579 | 0.90 | 2 | 2 | 2 | tier3 | shared           | 0 |
| 11 | 115895264 | 116390054 | C | T | 594 | 61 | 0.09 | 345 | 270 | 0.44 | 357 | 268 | 0.43 | 2 | 2 | 2 | tier3 | shared           | 1 |

|    |           |           |   |   |     |     |      |     |     |      |     |     |      |   |      |      |       |                  |   |
|----|-----------|-----------|---|---|-----|-----|------|-----|-----|------|-----|-----|------|---|------|------|-------|------------------|---|
| 11 | 117810868 | 118305658 | G | A | 366 | 36  | 0.09 | 288 | 231 | 0.45 | 295 | 229 | 0.44 | 2 | 2    | 2    | tier2 | shared           | 0 |
| 11 | 1229284   | 1272708   | C | T | 210 | 33  | 0.14 | 21  | 263 | 0.93 | 18  | 246 | 0.93 | 2 | 1.28 | 1.25 | tier1 | shared           | 3 |
| 11 | 130208081 | 130702871 | G | T | 532 | 29  | 0.05 | 304 | 235 | 0.44 | 319 | 266 | 0.45 | 2 | 2    | 2    | tier3 | shared           | 0 |
| 11 | 132418266 | 132913056 | G | A | 532 | 50  | 0.09 | 378 | 273 | 0.42 | 379 | 311 | 0.45 | 2 | 2    | 2    | tier3 | shared           | 0 |
| 11 | 132937657 | 133432447 | G | A | 492 | 11  | 0.02 | 518 | 86  | 0.14 | 604 | 43  | 0.07 | 2 | 2    | 2    | tier3 | shared           | 0 |
| 11 | 27062649  | 27106073  | C | T | 606 | 100 | 0.14 | 56  | 725 | 0.93 | 89  | 643 | 0.88 | 2 | 2    | 2    | tier3 | shared           | 0 |
| 11 | 29918482  | 29961906  | A | T | 404 | 74  | 0.15 | 65  | 405 | 0.86 | 36  | 448 | 0.93 | 2 | 2    | 2    | tier3 | shared           | 1 |
| 11 | 40213930  | 40257354  | G | A | 577 | 88  | 0.13 | 50  | 586 | 0.92 | 69  | 494 | 0.88 | 2 | 2    | 2    | tier3 | shared           | 0 |
| 11 | 61267618  | 61511042  | C | T | 325 | 0   | 0.00 | 365 | 0   | 0.00 | 313 | 76  | 0.20 | 2 | 2    | 1.38 | tier1 | relapse-specific | 1 |
| 11 | 64146939  | 64390363  | G | A | 310 | 0   | 0.00 | 365 | 2   | 0.01 | 302 | 55  | 0.15 | 2 | 2    | 1.37 | tier1 | relapse-specific | 2 |
| 11 | 69709680  | 70032032  | C | T | 357 | 22  | 0.06 | 233 | 211 | 0.48 | 246 | 199 | 0.45 | 2 | 2    | 2    | tier3 | shared           | 1 |
| 11 | 83471362  | 83793714  | T | C | 626 | 1   | 0.00 | 604 | 3   | 0.00 | 480 | 108 | 0.18 | 2 | 2    | 2    | tier3 | relapse-specific | 0 |
| 11 | 99450197  | 99944987  | C | T | 566 | 46  | 0.08 | 352 | 290 | 0.45 | 305 | 260 | 0.46 | 2 | 2    | 2    | tier1 | shared           | 2 |
| 12 | 105079083 | 106554953 | T | G | 533 | 60  | 0.10 | 324 | 283 | 0.47 | 316 | 265 | 0.46 | 2 | 2    | 2    | tier3 | shared           | 0 |
| 12 | 115921314 | 117436931 | A | G | 463 | 5   | 0.01 | 520 | 74  | 0.12 | 500 | 51  | 0.09 | 2 | 2    | 2    | tier3 | shared           | 0 |
| 12 | 126424656 | 127858703 | G | A | 343 | 0   | 0.00 | 353 | 0   | 0.00 | 282 | 84  | 0.23 | 2 | 2    | 2    | tier3 | relapse-specific | 1 |
| 12 | 2256098   | 2385837   | T | C | 631 | 49  | 0.07 | 336 | 291 | 0.46 | 303 | 276 | 0.48 | 2 | 2    | 2    | tier3 | shared           | 0 |
| 12 | 23485260  | 23593993  | C | T | 729 | 56  | 0.07 | 403 | 318 | 0.44 | 365 | 288 | 0.44 | 2 | 2    | 2    | tier2 | shared           | 1 |
| 12 | 40185832  | 41899565  | C | T | 538 | 40  | 0.07 | 347 | 237 | 0.41 | 467 | 156 | 0.25 | 2 | 2    | 2    | tier3 | shared           | 0 |
| 12 | 62791514  | 64505247  | G | A | 510 | 43  | 0.08 | 289 | 266 | 0.48 | 284 | 209 | 0.42 | 2 | 2    | 2    | tier3 | shared           | 0 |
| 12 | 67574421  | 69288154  | C | T | 519 | 38  | 0.07 | 274 | 239 | 0.47 | 318 | 247 | 0.44 | 2 | 2    | 2    | tier3 | shared           | 0 |
| 12 | 72713799  | 74427532  | G | A | 636 | 45  | 0.07 | 421 | 300 | 0.42 | 433 | 367 | 0.46 | 2 | 2    | 2    | tier3 | shared           | 1 |
| 12 | 77851066  | 79326935  | C | T | 447 | 29  | 0.06 | 229 | 170 | 0.43 | 286 | 207 | 0.42 | 2 | 2    | 2    | tier3 | shared           | 1 |
| 12 | 80948256  | 82424125  | G | T | 592 | 51  | 0.08 | 317 | 243 | 0.43 | 290 | 242 | 0.45 | 2 | 2    | 2    | tier3 | shared           | 1 |
| 12 | 83033586  | 84509455  | T | C | 558 | 0   | 0.00 | 517 | 0   | 0.00 | 438 | 76  | 0.15 | 2 | 2    | 2    | tier3 | relapse-specific | 1 |
| 12 | 93956009  | 95431878  | C | A | 637 | 0   | 0.00 | 640 | 1   | 0.00 | 419 | 68  | 0.14 | 2 | 2    | 2    | tier3 | relapse-specific | 0 |
| 13 | 102456951 | 103658950 | G | A | 500 | 25  | 0.05 | 291 | 201 | 0.41 | 307 | 241 | 0.44 | 2 | 2    | 2    | tier3 | shared           | 0 |
| 13 | 102748923 | 103950922 | A | G | 483 | 37  | 0.07 | 237 | 227 | 0.49 | 271 | 233 | 0.46 | 2 | 2    | 2    | tier3 | shared           | 0 |
| 13 | 112352058 | 113304057 | C | G | 661 | 51  | 0.07 | 439 | 301 | 0.41 | 416 | 334 | 0.45 | 2 | 2    | 2    | tier3 | shared           | 0 |
| 13 | 18194366  | 19296366  | C | G | 420 | 30  | 0.07 | 240 | 196 | 0.45 | 311 | 119 | 0.28 | 2 | 2    | 1.03 | tier3 | shared           | 0 |
| 13 | 18910252  | 20012252  | C | T | 381 | 32  | 0.08 | 213 | 165 | 0.44 | 198 | 191 | 0.49 | 2 | 2    | 2    | tier1 | shared           | 0 |
| 13 | 24234864  | 25336864  | C | T | 516 | 36  | 0.07 | 334 | 252 | 0.43 | 336 | 268 | 0.44 | 2 | 2    | 2    | tier2 | shared           | 0 |
| 13 | 32762787  | 33864787  | C | G | 438 | 33  | 0.07 | 293 | 259 | 0.47 | 343 | 274 | 0.44 | 2 | 2    | 2    | tier3 | shared           | 0 |
| 13 | 34044835  | 35146835  | G | T | 701 | 68  | 0.09 | 396 | 341 | 0.46 | 338 | 282 | 0.45 | 2 | 2    | 2    | tier3 | shared           | 0 |
| 13 | 35322433  | 36424433  | G | A | 433 | 21  | 0.05 | 186 | 138 | 0.43 | 172 | 126 | 0.42 | 2 | 2    | 2    | tier3 | shared           | 1 |
| 13 | 42492740  | 43594740  | T | C | 440 | 37  | 0.08 | 244 | 215 | 0.47 | 264 | 239 | 0.48 | 2 | 2    | 2    | tier3 | shared           | 1 |
| 13 | 55692368  | 56794367  | C | T | 423 | 24  | 0.05 | 206 | 152 | 0.42 | 231 | 168 | 0.42 | 2 | 2    | 2    | tier3 | shared           | 0 |
| 13 | 57139096  | 58241095  | C | A | 455 | 0   | 0.00 | 490 | 2   | 0.00 | 360 | 68  | 0.16 | 2 | 2    | 2    | tier3 | relapse-specific | 0 |
| 13 | 57370234  | 58472233  | G | A | 404 | 22  | 0.05 | 202 | 155 | 0.43 | 219 | 160 | 0.42 | 2 | 2    | 2    | tier3 | shared           | 0 |
| 13 | 62444093  | 63546092  | C | T | 352 | 1   | 0.00 | 269 | 0   | 0.00 | 215 | 34  | 0.14 | 2 | 2    | 2    | tier3 | relapse-specific | 1 |

|    |           |           |         |         |     |    |      |     |     |      |     |     |      |   |   |      |       |                  |   |
|----|-----------|-----------|---------|---------|-----|----|------|-----|-----|------|-----|-----|------|---|---|------|-------|------------------|---|
| 13 | 62827741  | 63929740  | A       | T       | 373 | 0  | 0.00 | 291 | 0   | 0.00 | 299 | 46  | 0.13 | 2 | 2 | 2    | tier3 | relapse-specific | 1 |
| 13 | 62831674  | 63933673  | T       | C       | 402 | 22 | 0.05 | 228 | 199 | 0.47 | 232 | 201 | 0.46 | 2 | 2 | 2    | tier3 | shared           | 1 |
| 13 | 65766919  | 66868918  | G       | T       | 552 | 70 | 0.11 | 385 | 301 | 0.44 | 383 | 295 | 0.44 | 2 | 2 | 2    | tier3 | shared           | 0 |
| 13 | 68643128  | 69745127  | G       | T       | 400 | 34 | 0.08 | 205 | 150 | 0.42 | 191 | 126 | 0.40 | 2 | 2 | 2    | tier3 | shared           | 1 |
| 13 | 71336488  | 72438487  | G       | A       | 601 | 59 | 0.09 | 388 | 291 | 0.43 | 380 | 359 | 0.49 | 2 | 2 | 2    | tier3 | shared           | 0 |
| 13 | 72244339  | 73346338  | C       | T       | 561 | 43 | 0.07 | 330 | 251 | 0.43 | 324 | 285 | 0.47 | 2 | 2 | 2    | tier1 | shared           | 3 |
| 13 | 77524745  | 78626744  | T       | C       | 376 | 18 | 0.05 | 188 | 174 | 0.48 | 244 | 200 | 0.45 | 2 | 2 | 2    | tier3 | shared           | 1 |
| 13 | 85872286  | 87074285  | G       | T       | 475 | 33 | 0.06 | 287 | 223 | 0.44 | 256 | 225 | 0.47 | 2 | 2 | 2    | tier3 | shared           | 1 |
| 13 | 89507219  | 90709218  | G       | A       | 563 | 32 | 0.05 | 332 | 220 | 0.40 | 271 | 219 | 0.45 | 2 | 2 | 2    | tier3 | shared           | 1 |
| 13 | 89938365  | 91140364  | T       | -       | 526 | 49 | 0.09 | 334 | 231 | 0.41 | 339 | 256 | 0.43 | 2 | 2 | 2    | tier3 | shared           | 1 |
| 13 | 90217967  | 91419966  | T       | C       | 472 | 29 | 0.06 | 240 | 241 | 0.50 | 216 | 272 | 0.56 | 2 | 2 | 2    | tier3 | shared           | 0 |
| 13 | 92080314  | 93282313  | A       | C       | 468 | 34 | 0.07 | 256 | 223 | 0.47 | 221 | 202 | 0.48 | 2 | 2 | 2    | tier3 | shared           | 0 |
| 13 | 94678458  | 95880457  | C       | T       | 452 | 37 | 0.08 | 322 | 240 | 0.43 | 410 | 147 | 0.26 | 2 | 2 | 2    | tier2 | shared           | 0 |
| 14 | 100608867 | 101539114 | -       | TGAGCGC | 217 | 15 | 0.06 | 148 | 114 | 0.44 | 149 | 129 | 0.46 | 2 | 2 | 2    | tier3 | shared           | 0 |
| 14 | 103961698 | 104890653 | -       | G       | 178 | 12 | 0.06 | 163 | 65  | 0.29 | 183 | 47  | 0.20 | 2 | 2 | 1.28 | tier3 | shared           | 0 |
| 14 | 105609184 | 106538139 | C       | G       | 559 | 1  | 0.00 | 560 | 2   | 0.00 | 462 | 108 | 0.19 | 2 | 2 | 2    | tier3 | relapse-specific | 1 |
| 14 | 26207658  | 27137818  | C       | T       | 406 | 29 | 0.07 | 242 | 205 | 0.46 | 221 | 184 | 0.45 | 2 | 2 | 2    | tier3 | shared           | 1 |
| 14 | 27174620  | 28104780  | T       | C       | 347 | 14 | 0.04 | 190 | 153 | 0.45 | 186 | 170 | 0.48 | 2 | 2 | 2    | tier3 | shared           | 0 |
| 14 | 33102337  | 34032586  | C       | T       | 430 | 24 | 0.05 | 275 | 247 | 0.47 | 364 | 169 | 0.32 | 2 | 2 | 2    | tier3 | shared           | 0 |
| 14 | 39653662  | 40583911  | T       | A       | 469 | 35 | 0.07 | 228 | 172 | 0.43 | 236 | 178 | 0.43 | 2 | 2 | 2    | tier3 | shared           | 1 |
| 14 | 46290472  | 47220722  | C       | T       | 621 | 0  | 0.00 | 591 | 0   | 0.00 | 528 | 36  | 0.06 | 2 | 2 | 2    | tier3 | relapse-specific | 1 |
| 14 | 49588483  | 50518733  | G       | A       | 413 | 37 | 0.08 | 252 | 261 | 0.51 | 286 | 271 | 0.49 | 2 | 2 | 2    | tier3 | shared           | 0 |
| 14 | 49822908  | 50753158  | C       | T       | 392 | 39 | 0.09 | 270 | 256 | 0.49 | 297 | 217 | 0.42 | 2 | 2 | 2    | tier3 | shared           | 0 |
| 14 | 77942449  | 78872696  | C       | T       | 294 | 31 | 0.10 | 233 | 205 | 0.47 | 254 | 217 | 0.46 | 2 | 2 | 2    | tier3 | shared           | 2 |
| 14 | 82072551  | 83002798  | C       | T       | 467 | 31 | 0.06 | 250 | 221 | 0.47 | 192 | 190 | 0.50 | 2 | 2 | 2    | tier2 | shared           | 1 |
| 14 | 95069562  | 95999809  | C       | T       | 502 | 44 | 0.08 | 223 | 277 | 0.55 | 229 | 246 | 0.52 | 2 | 2 | 2    | tier1 | shared           | 0 |
| 15 | 33923658  | 36136366  | C       | G       | 648 | 58 | 0.08 | 412 | 378 | 0.48 | 357 | 281 | 0.44 | 2 | 2 | 2    | tier3 | shared           | 1 |
| 15 | 51192438  | 53405146  | G       | A       | 560 | 30 | 0.05 | 309 | 243 | 0.44 | 333 | 245 | 0.42 | 2 | 2 | 2    | tier3 | shared           | 1 |
| 15 | 61924663  | 64137610  | A       | T       | 325 | 26 | 0.07 | 151 | 140 | 0.48 | 169 | 136 | 0.45 | 2 | 2 | 2    | tier3 | shared           | 2 |
| 15 | 76418530  | 78631475  | C       | T       | 446 | 0  | 0.00 | 519 | 0   | 0.00 | 462 | 81  | 0.15 | 2 | 2 | 2    | tier3 | relapse-specific | 0 |
| 15 | 84063349  | 86262345  | AAGATCA | -       | 735 | 61 | 0.08 | 411 | 336 | 0.45 | 420 | 317 | 0.43 | 2 | 2 | 2    | tier1 | shared           | 2 |
| 15 | 85958112  | 88157108  | A       | T       | 500 | 40 | 0.07 | 323 | 243 | 0.43 | 316 | 233 | 0.42 | 2 | 2 | 2    | tier3 | shared           | 0 |
| 15 | 91530325  | 93729321  | T       | C       | 578 | 44 | 0.07 | 336 | 272 | 0.45 | 356 | 291 | 0.45 | 2 | 2 | 2    | tier3 | shared           | 0 |
| 15 | 96588459  | 98770936  | G       | A       | 546 | 56 | 0.09 | 393 | 294 | 0.43 | 528 | 184 | 0.26 | 2 | 2 | 2    | tier3 | shared           | 1 |
| 16 | 26981824  | 27074323  | G       | A       | 449 | 0  | 0.00 | 491 | 0   | 0.00 | 470 | 81  | 0.15 | 2 | 2 | 2    | tier3 | relapse-specific | 1 |
| 16 | 32542349  | 32634848  | T       | C       | 311 | 33 | 0.10 | 231 | 179 | 0.44 | 207 | 186 | 0.47 | 2 | 2 | 2    | tier3 | shared           | 0 |
| 16 | 46232164  | 47674663  | G       | C       | 521 | 39 | 0.07 | 324 | 252 | 0.44 | 347 | 275 | 0.44 | 2 | 2 | 2    | tier3 | shared           | 0 |
| 16 | 46589196  | 48031695  | C       | T       | 538 | 28 | 0.05 | 302 | 220 | 0.42 | 221 | 205 | 0.48 | 2 | 2 | 2    | tier3 | shared           | 1 |
| 16 | 47618839  | 49061338  | T       | -       | 491 | 41 | 0.08 | 308 | 263 | 0.46 | 336 | 236 | 0.41 | 2 | 2 | 2    | tier2 | shared           | 1 |
| 16 | 58855461  | 60297960  | G       | T       | 373 | 34 | 0.08 | 197 | 191 | 0.49 | 253 | 197 | 0.44 | 2 | 2 | 2    | tier3 | shared           | 1 |

|    |          |          |   |   |     |    |      |     |     |      |     |     |      |   |   |      |       |                  |   |
|----|----------|----------|---|---|-----|----|------|-----|-----|------|-----|-----|------|---|---|------|-------|------------------|---|
| 16 | 61371424 | 62813923 | A | T | 263 | 10 | 0.04 | 153 | 121 | 0.44 | 158 | 136 | 0.46 | 2 | 2 | 2    | tier3 | shared           | 0 |
| 16 | 61582014 | 63024513 | T | C | 325 | 24 | 0.07 | 195 | 130 | 0.40 | 247 | 70  | 0.22 | 2 | 2 | 2    | tier3 | shared           | 1 |
| 16 | 61594300 | 63036799 | - | A | 296 | 7  | 0.02 | 137 | 121 | 0.47 | 168 | 124 | 0.42 | 2 | 2 | 2    | tier3 | shared           | 1 |
| 16 | 61970462 | 63412961 | T | G | 515 | 35 | 0.06 | 260 | 204 | 0.44 | 298 | 244 | 0.45 | 2 | 2 | 2    | tier3 | shared           | 0 |
| 16 | 6728056  | 6788055  | T | C | 302 | 19 | 0.06 | 174 | 156 | 0.47 | 200 | 74  | 0.27 | 2 | 2 | 2    | tier3 | shared           | 0 |
| 16 | 71333400 | 72775899 | G | T | 362 | 0  | 0.00 | 339 | 0   | 0.00 | 336 | 61  | 0.15 | 2 | 2 | 2    | tier3 | relapse-specific | 1 |
| 17 | 11513530 | 11572805 | T | G | 503 | 50 | 0.09 | 321 | 260 | 0.45 | 313 | 256 | 0.45 | 2 | 2 | 2    | tier1 | shared           | 5 |
| 17 | 13501009 | 13560284 | G | A | 342 | 0  | 0.00 | 335 | 0   | 0.00 | 301 | 62  | 0.17 | 2 | 2 | 2    | tier3 | relapse-specific | 1 |
| 17 | 21630034 | 21705907 | T | G | 199 | 4  | 0.02 | 68  | 77  | 0.53 | 72  | 54  | 0.43 | 2 | 2 | 2    | tier3 | shared           | 0 |
| 17 | 21927249 | 22003122 | C | T | 408 | 51 | 0.11 | 243 | 221 | 0.48 | 287 | 234 | 0.45 | 2 | 2 | 2    | tier3 | shared           | 0 |
| 17 | 22978938 | 25954811 | G | A | 388 | 33 | 0.08 | 277 | 245 | 0.47 | 252 | 219 | 0.46 | 2 | 2 | 2    | tier3 | shared           | 0 |
| 17 | 3004064  | 3057314  | G | A | 467 | 0  | 0.00 | 525 | 0   | 0.00 | 436 | 106 | 0.20 | 2 | 2 | 2    | tier1 | relapse-specific | 0 |
| 17 | 31379333 | 34355220 | G | A | 545 | 1  | 0.00 | 553 | 0   | 0.00 | 497 | 145 | 0.23 | 2 | 2 | 2    | tier3 | relapse-specific | 0 |
| 17 | 36816355 | 39562829 | C | T | 311 | 37 | 0.11 | 244 | 161 | 0.40 | 226 | 146 | 0.39 | 2 | 2 | 2    | tier3 | shared           | 0 |
| 17 | 40721872 | 43366089 | G | A | 281 | 30 | 0.10 | 200 | 176 | 0.47 | 254 | 191 | 0.43 | 2 | 2 | 2    | tier3 | shared           | 0 |
| 17 | 46647529 | 49292530 | G | A | 531 | 37 | 0.07 | 320 | 265 | 0.45 | 339 | 230 | 0.40 | 2 | 2 | 2    | tier2 | shared           | 0 |
| 17 | 54205222 | 56850223 | C | T | 553 | 46 | 0.08 | 344 | 239 | 0.41 | 300 | 250 | 0.45 | 2 | 2 | 2    | tier3 | shared           | 0 |
| 17 | 69394173 | 71882578 | G | A | 709 | 1  | 0.00 | 775 | 0   | 0.00 | 678 | 160 | 0.19 | 2 | 2 | 2    | tier3 | relapse-specific | 1 |
| 18 | 13532518 | 13542518 | G | T | 329 | 28 | 0.08 | 269 | 207 | 0.43 | 254 | 221 | 0.47 | 2 | 2 | 2    | tier3 | shared           | 1 |
| 18 | 25377609 | 27123611 | G | T | 412 | 24 | 0.06 | 247 | 175 | 0.41 | 262 | 133 | 0.34 | 2 | 2 | 2    | tier3 | shared           | 1 |
| 18 | 29678931 | 31424933 | G | A | 450 | 1  | 0.00 | 488 | 2   | 0.00 | 430 | 110 | 0.20 | 2 | 2 | 2    | tier3 | relapse-specific | 0 |
| 18 | 3064471  | 3074471  | T | C | 458 | 37 | 0.07 | 282 | 286 | 0.50 | 329 | 277 | 0.46 | 2 | 2 | 2    | tier3 | shared           | 0 |
| 18 | 31880060 | 33626062 | A | C | 386 | 38 | 0.09 | 224 | 192 | 0.46 | 203 | 199 | 0.50 | 2 | 2 | 2    | tier3 | shared           | 0 |
| 18 | 37355263 | 39101265 | C | T | 745 | 0  | 0.00 | 826 | 0   | 0.00 | 715 | 124 | 0.15 | 2 | 2 | 2    | tier3 | relapse-specific | 0 |
| 18 | 44872991 | 46618993 | G | C | 446 | 35 | 0.07 | 276 | 237 | 0.46 | 277 | 241 | 0.47 | 2 | 2 | 2    | tier3 | shared           | 0 |
| 18 | 47612101 | 49358103 | A | - | 261 | 40 | 0.13 | 111 | 124 | 0.53 | 96  | 105 | 0.52 | 2 | 2 | 2    | tier3 | shared           | 0 |
| 18 | 49094566 | 50840568 | G | A | 587 | 39 | 0.06 | 342 | 242 | 0.41 | 422 | 144 | 0.25 | 2 | 2 | 2    | tier3 | shared           | 0 |
| 18 | 53838328 | 55687330 | G | C | 814 | 1  | 0.00 | 875 | 0   | 0.00 | 710 | 150 | 0.17 | 2 | 2 | 2    | tier3 | relapse-specific | 0 |
| 18 | 5846231  | 5856231  | C | T | 579 | 0  | 0.00 | 494 | 0   | 0.00 | 347 | 63  | 0.15 | 2 | 2 | 2    | tier3 | relapse-specific | 0 |
| 18 | 61800412 | 63649432 | A | G | 596 | 39 | 0.06 | 349 | 267 | 0.43 | 396 | 313 | 0.44 | 2 | 2 | 2    | tier3 | shared           | 1 |
| 18 | 63477988 | 65327008 | T | A | 789 | 45 | 0.05 | 447 | 332 | 0.43 | 581 | 178 | 0.23 | 2 | 2 | 2    | tier3 | shared           | 1 |
| 18 | 63843371 | 65692391 | C | T | 516 | 32 | 0.06 | 357 | 318 | 0.47 | 320 | 287 | 0.47 | 2 | 2 | 2    | tier3 | shared           | 1 |
| 18 | 66656743 | 68505763 | A | T | 230 | 9  | 0.04 | 142 | 124 | 0.47 | 156 | 121 | 0.44 | 2 | 2 | 2    | tier3 | shared           | 1 |
| 18 | 73920029 | 75819041 | C | A | 488 | 47 | 0.09 | 337 | 301 | 0.47 | 287 | 276 | 0.49 | 2 | 2 | 2    | tier3 | shared           | 0 |
| 18 | 8840453  | 8850453  | G | A | 461 | 45 | 0.09 | 314 | 247 | 0.44 | 250 | 219 | 0.47 | 2 | 2 | 2    | tier3 | shared           | 1 |
| 19 | 35150116 | 30458276 | G | A | 521 | 31 | 0.06 | 381 | 262 | 0.41 | 476 | 167 | 0.26 | 2 | 2 | 2    | tier3 | shared           | 0 |
| 19 | 39057748 | 34365908 | G | A | 381 | 27 | 0.07 | 206 | 136 | 0.40 | 258 | 81  | 0.24 | 2 | 2 | 2    | tier2 | shared           | 1 |
| 19 | 39761080 | 35069240 | C | T | 191 | 22 | 0.10 | 137 | 92  | 0.40 | 158 | 131 | 0.45 | 2 | 2 | 2    | tier3 | shared           | 0 |
| 19 | 48131669 | 43439829 | G | T | 142 | 8  | 0.05 | 95  | 103 | 0.52 | 113 | 77  | 0.41 | 2 | 2 | 2    | tier1 | shared           | 0 |
| 19 | 5248118  | 5297118  | G | A | 179 | 24 | 0.12 | 140 | 153 | 0.52 | 169 | 173 | 0.51 | 2 | 2 | 1.23 | tier3 | shared           | 1 |

|   |           |           |                             |   |     |    |      |     |     |      |     |     |      |   |   |   |       |                  |   |
|---|-----------|-----------|-----------------------------|---|-----|----|------|-----|-----|------|-----|-----|------|---|---|---|-------|------------------|---|
| 2 | 100377523 | 101011091 | C                           | T | 411 | 47 | 0.10 | 243 | 222 | 0.48 | 318 | 278 | 0.47 | 2 | 2 | 2 | tier3 | shared           | 0 |
| 2 | 103930757 | 104564325 | T                           | C | 435 | 34 | 0.07 | 222 | 201 | 0.48 | 251 | 169 | 0.40 | 2 | 2 | 2 | tier3 | shared           | 1 |
| 2 | 106517597 | 107151165 | G                           | A | 337 | 22 | 0.06 | 272 | 222 | 0.45 | 275 | 239 | 0.46 | 2 | 2 | 2 | tier2 | shared           | 1 |
| 2 | 109210679 | 109844247 | T                           | A | 416 | 46 | 0.10 | 313 | 304 | 0.49 | 350 | 277 | 0.44 | 2 | 2 | 2 | tier3 | shared           | 0 |
| 2 | 112581114 | 112864643 | G                           | C | 515 | 57 | 0.10 | 270 | 277 | 0.51 | 320 | 237 | 0.43 | 2 | 2 | 2 | tier3 | shared           | 1 |
| 2 | 116164256 | 116447786 | ACTTTCCATTA<br>CATAATATTGTC | - | 255 | 24 | 0.09 | 138 | 113 | 0.45 | 165 | 133 | 0.45 | 2 | 2 | 2 | tier3 | shared           | 0 |
| 2 | 119959157 | 120242687 | C                           | T | 365 | 30 | 0.08 | 281 | 227 | 0.45 | 284 | 204 | 0.42 | 2 | 2 | 2 | tier3 | shared           | 2 |
| 2 | 121062191 | 121345721 | C                           | T | 678 | 0  | 0.00 | 659 | 0   | 0.00 | 575 | 113 | 0.16 | 2 | 2 | 2 | tier2 | relapse-specific | 1 |
| 2 | 121512897 | 121796427 | G                           | T | 613 | 0  | 0.00 | 815 | 0   | 0.00 | 705 | 159 | 0.18 | 2 | 2 | 2 | tier3 | relapse-specific | 0 |
| 2 | 123733119 | 124016649 | C                           | T | 661 | 64 | 0.09 | 402 | 357 | 0.47 | 358 | 315 | 0.47 | 2 | 2 | 2 | tier3 | shared           | 1 |
| 2 | 125156383 | 125439913 | G                           | T | 749 | 1  | 0.00 | 677 | 0   | 0.00 | 663 | 48  | 0.07 | 2 | 2 | 2 | tier2 | relapse-specific | 2 |
| 2 | 125314902 | 125598432 | C                           | A | 496 | 2  | 0.00 | 594 | 0   | 0.00 | 479 | 82  | 0.15 | 2 | 2 | 2 | tier2 | relapse-specific | 2 |
| 2 | 12812570  | 12895119  | C                           | T | 498 | 39 | 0.07 | 309 | 260 | 0.46 | 311 | 275 | 0.47 | 2 | 2 | 2 | tier3 | shared           | 0 |
| 2 | 132126629 | 132410159 | A                           | G | 279 | 0  | 0.00 | 277 | 0   | 0.00 | 203 | 53  | 0.21 | 2 | 2 | 2 | tier3 | relapse-specific | 1 |
| 2 | 133290595 | 133574125 | G                           | A | 396 | 39 | 0.09 | 277 | 218 | 0.44 | 303 | 267 | 0.47 | 2 | 2 | 2 | tier3 | shared           | 1 |
| 2 | 136723675 | 137007205 | G                           | A | 733 | 1  | 0.00 | 830 | 0   | 0.00 | 647 | 151 | 0.19 | 2 | 2 | 2 | tier3 | relapse-specific | 0 |
| 2 | 151445176 | 151736930 | C                           | A | 880 | 0  | 0.00 | 847 | 1   | 0.00 | 886 | 47  | 0.05 | 2 | 2 | 2 | tier3 | relapse-specific | 1 |
| 2 | 152045229 | 152336983 | C                           | T | 517 | 42 | 0.08 | 312 | 248 | 0.44 | 279 | 214 | 0.43 | 2 | 2 | 2 | tier3 | shared           | 1 |
| 2 | 1604624   | 1625617   | G                           | A | 432 | 37 | 0.08 | 302 | 270 | 0.47 | 356 | 280 | 0.44 | 2 | 2 | 2 | tier3 | shared           | 0 |
| 2 | 16261487  | 16398006  | C                           | T | 590 | 0  | 0.00 | 588 | 1   | 0.00 | 488 | 98  | 0.17 | 2 | 2 | 2 | tier2 | relapse-specific | 0 |
| 2 | 164635523 | 164927277 | T                           | A | 485 | 21 | 0.04 | 385 | 94  | 0.20 | 381 | 57  | 0.13 | 2 | 2 | 2 | tier3 | shared           | 1 |
| 2 | 164718050 | 165009804 | G                           | T | 788 | 0  | 0.00 | 773 | 0   | 0.00 | 556 | 114 | 0.17 | 2 | 2 | 2 | tier3 | relapse-specific | 1 |
| 2 | 164933994 | 165225748 | A                           | T | 434 | 2  | 0.00 | 388 | 0   | 0.00 | 345 | 57  | 0.14 | 2 | 2 | 2 | tier3 | relapse-specific | 1 |
| 2 | 165489935 | 165781689 | G                           | A | 717 | 60 | 0.08 | 379 | 323 | 0.46 | 373 | 343 | 0.48 | 2 | 2 | 2 | tier3 | shared           | 1 |
| 2 | 182857117 | 183148872 | G                           | A | 505 | 23 | 0.04 | 326 | 274 | 0.46 | 305 | 226 | 0.43 | 2 | 2 | 2 | tier3 | shared           | 0 |
| 2 | 1851512   | 1872505   | C                           | T | 150 | 13 | 0.08 | 136 | 94  | 0.41 | 138 | 120 | 0.47 | 2 | 2 | 2 | tier2 | shared           | 0 |
| 2 | 193658805 | 193950560 | A                           | T | 459 | 40 | 0.08 | 277 | 173 | 0.38 | 296 | 129 | 0.30 | 2 | 2 | 2 | tier3 | shared           | 1 |
| 2 | 200615435 | 200907190 | G                           | T | 503 | 1  | 0.00 | 534 | 1   | 0.00 | 425 | 84  | 0.17 | 2 | 2 | 2 | tier2 | relapse-specific | 1 |
| 2 | 200990862 | 201282617 | G                           | A | 408 | 32 | 0.07 | 235 | 248 | 0.51 | 270 | 200 | 0.43 | 2 | 2 | 2 | tier2 | shared           | 1 |
| 2 | 204874744 | 205166499 | T                           | C | 458 | 37 | 0.07 | 248 | 229 | 0.48 | 287 | 227 | 0.44 | 2 | 2 | 2 | tier3 | shared           | 1 |
| 2 | 207420782 | 207712537 | G                           | A | 391 | 41 | 0.09 | 276 | 242 | 0.47 | 317 | 236 | 0.43 | 2 | 2 | 2 | tier3 | shared           | 1 |
| 2 | 214933246 | 215225001 | T                           | C | 482 | 0  | 0.00 | 456 | 0   | 0.00 | 391 | 74  | 0.16 | 2 | 2 | 2 | tier3 | relapse-specific | 0 |
| 2 | 225157935 | 225449691 | C                           | A | 199 | 16 | 0.07 | 102 | 92  | 0.47 | 88  | 88  | 0.50 | 2 | 2 | 2 | tier1 | shared           | 1 |
| 2 | 23020073  | 23166568  | C                           | A | 466 | 23 | 0.05 | 270 | 227 | 0.46 | 307 | 246 | 0.44 | 2 | 2 | 2 | tier3 | shared           | 1 |
| 2 | 240682780 | 241034107 | A                           | T | 528 | 46 | 0.08 | 320 | 275 | 0.46 | 342 | 294 | 0.46 | 2 | 2 | 2 | tier3 | shared           | 0 |
| 2 | 32298967  | 32445463  | A                           | G | 545 | 46 | 0.08 | 352 | 344 | 0.49 | 383 | 285 | 0.43 | 2 | 2 | 2 | tier1 | shared           | 1 |
| 2 | 34324995  | 34471491  | C                           | T | 555 | 46 | 0.08 | 384 | 321 | 0.46 | 362 | 332 | 0.48 | 2 | 2 | 2 | tier3 | shared           | 1 |
| 2 | 3653144   | 3675269   | A                           | G | 789 | 59 | 0.07 | 563 | 514 | 0.48 | 521 | 446 | 0.46 | 2 | 2 | 2 | tier2 | shared           | 0 |
| 2 | 429750    | 439750    | A                           | G | 373 | 25 | 0.06 | 244 | 193 | 0.44 | 229 | 192 | 0.46 | 2 | 2 | 2 | tier2 | shared           | 1 |
| 2 | 52295638  | 52442134  | A                           | G | 545 | 54 | 0.09 | 291 | 263 | 0.47 | 273 | 218 | 0.44 | 2 | 2 | 2 | tier3 | shared           | 1 |



|    |           |           |   |   |     |    |      |     |     |      |     |     |      |   |   |      |       |                  |   |
|----|-----------|-----------|---|---|-----|----|------|-----|-----|------|-----|-----|------|---|---|------|-------|------------------|---|
| 2  | 52365494  | 52511990  | G | T | 438 | 35 | 0.07 | 258 | 188 | 0.42 | 256 | 223 | 0.47 | 2 | 2 | 2    | tier3 | shared           | 0 |
| 2  | 5275186   | 5357735   | A | T | 497 | 41 | 0.08 | 383 | 240 | 0.39 | 426 | 151 | 0.26 | 2 | 2 | 2    | tier3 | shared           | 1 |
| 2  | 5381376   | 5463925   | A | T | 296 | 22 | 0.07 | 166 | 156 | 0.48 | 175 | 148 | 0.46 | 2 | 2 | 2    | tier3 | shared           | 0 |
| 2  | 59262624  | 59409120  | C | A | 620 | 51 | 0.08 | 370 | 316 | 0.46 | 424 | 322 | 0.43 | 2 | 2 | 2    | tier3 | shared           | 0 |
| 2  | 79424915  | 79571407  | T | G | 609 | 0  | 0.00 | 573 | 0   | 0.00 | 537 | 108 | 0.17 | 2 | 2 | 2    | tier3 | relapse-specific | 1 |
| 2  | 79610921  | 79757413  | A | - | 615 | 45 | 0.07 | 400 | 262 | 0.40 | 371 | 292 | 0.44 | 2 | 2 | 2    | tier3 | shared           | 1 |
| 2  | 81008756  | 81155245  | G | T | 355 | 1  | 0.00 | 313 | 0   | 0.00 | 222 | 28  | 0.11 | 2 | 2 | 2    | tier3 | relapse-specific | 1 |
| 2  | 83365574  | 83512063  | T | A | 533 | 0  | 0.00 | 451 | 4   | 0.01 | 453 | 93  | 0.17 | 2 | 2 | 2    | tier3 | relapse-specific | 1 |
| 20 | 12364137  | 12416137  | C | A | 515 | 0  | 0.00 | 554 | 0   | 0.00 | 478 | 86  | 0.15 | 2 | 2 | 2    | tier3 | relapse-specific | 1 |
| 20 | 41777325  | 42343911  | G | A | 362 | 40 | 0.10 | 232 | 187 | 0.45 | 256 | 200 | 0.44 | 2 | 2 | 2    | tier1 | shared           | 0 |
| 20 | 48335956  | 48902549  | G | A | 528 | 1  | 0.00 | 548 | 0   | 0.00 | 421 | 85  | 0.17 | 2 | 2 | 2    | tier3 | relapse-specific | 0 |
| 20 | 56078527  | 56645121  | C | A | 412 | 31 | 0.07 | 285 | 201 | 0.41 | 351 | 148 | 0.30 | 2 | 2 | 2    | tier3 | shared           | 0 |
| 20 | 56640598  | 57207192  | G | A | 377 | 35 | 0.08 | 188 | 211 | 0.53 | 223 | 192 | 0.46 | 2 | 2 | 2    | tier2 | shared           | 0 |
| 21 | 18754617  | 19832746  | C | T | 408 | 16 | 0.04 | 219 | 186 | 0.46 | 199 | 169 | 0.46 | 2 | 2 | 2    | tier3 | shared           | 1 |
| 21 | 21114306  | 22192435  | A | G | 428 | 0  | 0.00 | 529 | 0   | 0.00 | 407 | 97  | 0.19 | 2 | 2 | 2    | tier3 | relapse-specific | 0 |
| 21 | 21618540  | 22696669  | G | A | 601 | 34 | 0.05 | 324 | 238 | 0.42 | 440 | 154 | 0.26 | 2 | 2 | 2    | tier3 | shared           | 0 |
| 21 | 21760990  | 22839119  | G | T | 417 | 39 | 0.09 | 284 | 192 | 0.40 | 299 | 206 | 0.41 | 2 | 2 | 2    | tier3 | shared           | 0 |
| 21 | 21981958  | 23060087  | T | C | 399 | 22 | 0.05 | 198 | 134 | 0.40 | 222 | 137 | 0.38 | 2 | 2 | 2    | tier3 | shared           | 1 |
| 21 | 27426278  | 28504407  | T | C | 418 | 0  | 0.00 | 501 | 0   | 0.00 | 451 | 93  | 0.17 | 2 | 2 | 2    | tier3 | relapse-specific | 0 |
| 21 | 31893517  | 32971646  | T | A | 283 | 22 | 0.07 | 195 | 170 | 0.47 | 219 | 187 | 0.46 | 2 | 2 | 2    | tier3 | shared           | 0 |
| 21 | 38710638  | 39788768  | C | A | 458 | 30 | 0.06 | 302 | 246 | 0.45 | 300 | 209 | 0.41 | 2 | 2 | 2    | tier3 | shared           | 0 |
| 22 | 24241650  | 25911650  | T | C | 436 | 32 | 0.07 | 285 | 221 | 0.44 | 327 | 108 | 0.25 | 2 | 2 | 2    | tier3 | shared           | 0 |
| 22 | 29431149  | 31101149  | C | T | 548 | 34 | 0.06 | 286 | 248 | 0.46 | 310 | 288 | 0.48 | 2 | 2 | 2    | tier2 | shared           | 1 |
| 22 | 45144326  | 46765662  | G | T | 352 | 24 | 0.06 | 234 | 181 | 0.44 | 290 | 199 | 0.41 | 2 | 2 | 1.34 | tier1 | shared           | 1 |
| 22 | 49192948  | 50846082  | C | T | 428 | 0  | 0.00 | 395 | 0   | 0.00 | 425 | 90  | 0.17 | 2 | 2 | 1.26 | tier3 | relapse-specific | 0 |
| 3  | 103284349 | 101801659 | T | A | 593 | 45 | 0.07 | 370 | 353 | 0.49 | 403 | 316 | 0.44 | 2 | 2 | 2    | tier3 | shared           | 0 |
| 3  | 106257808 | 104775118 | A | G | 337 | 21 | 0.06 | 157 | 121 | 0.44 | 208 | 178 | 0.46 | 2 | 2 | 2    | tier3 | shared           | 1 |
| 3  | 11753564  | 11778564  | G | A | 296 | 33 | 0.10 | 199 | 142 | 0.42 | 245 | 163 | 0.40 | 2 | 2 | 2    | tier3 | shared           | 0 |
| 3  | 118059508 | 116576818 | A | G | 664 | 47 | 0.07 | 444 | 413 | 0.48 | 506 | 342 | 0.40 | 2 | 2 | 2    | tier3 | shared           | 1 |
| 3  | 118910038 | 117427348 | G | A | 552 | 37 | 0.06 | 317 | 219 | 0.41 | 293 | 248 | 0.46 | 2 | 2 | 2    | tier2 | shared           | 1 |
| 3  | 127686279 | 126203589 | G | A | 355 | 36 | 0.09 | 234 | 240 | 0.51 | 267 | 211 | 0.44 | 2 | 2 | 2    | tier3 | shared           | 0 |
| 3  | 141518769 | 140036079 | C | T | 448 | 29 | 0.06 | 270 | 230 | 0.46 | 286 | 197 | 0.41 | 2 | 2 | 2    | tier3 | shared           | 0 |
| 3  | 141679317 | 140196627 | C | T | 572 | 40 | 0.07 | 336 | 302 | 0.47 | 342 | 302 | 0.47 | 2 | 2 | 2    | tier3 | shared           | 0 |
| 3  | 145481009 | 143998319 | A | G | 404 | 27 | 0.06 | 222 | 161 | 0.42 | 198 | 182 | 0.48 | 2 | 2 | 2    | tier2 | shared           | 1 |
| 3  | 146095944 | 144613254 | C | T | 467 | 48 | 0.09 | 241 | 230 | 0.49 | 269 | 258 | 0.49 | 2 | 2 | 2    | tier3 | shared           | 1 |
| 3  | 149273554 | 147790864 | A | G | 450 | 30 | 0.06 | 200 | 176 | 0.47 | 191 | 146 | 0.43 | 2 | 2 | 2    | tier3 | shared           | 0 |
| 3  | 149296851 | 147814161 | C | T | 371 | 34 | 0.08 | 228 | 193 | 0.46 | 270 | 201 | 0.43 | 2 | 2 | 2    | tier2 | shared           | 0 |
| 3  | 154188051 | 152705361 | C | A | 113 | 5  | 0.04 | 56  | 36  | 0.39 | 51  | 20  | 0.28 | 2 | 2 | 2    | tier3 | shared           | 1 |
| 3  | 167344171 | 165861477 | A | C | 548 | 48 | 0.08 | 333 | 249 | 0.43 | 452 | 161 | 0.26 | 2 | 2 | 2    | tier3 | shared           | 0 |
| 3  | 175001625 | 173518931 | T | C | 608 | 0  | 0.00 | 549 | 0   | 0.00 | 571 | 31  | 0.05 | 2 | 2 | 2    | tier3 | relapse-specific | 0 |

|   |           |           |   |   |     |    |      |     |     |      |     |     |      |   |   |      |       |                  |   |
|---|-----------|-----------|---|---|-----|----|------|-----|-----|------|-----|-----|------|---|---|------|-------|------------------|---|
| 3 | 18036353  | 18061349  | G | A | 555 | 46 | 0.08 | 374 | 335 | 0.47 | 429 | 294 | 0.41 | 2 | 2 | 2    | tier3 | shared           | 1 |
| 3 | 18385519  | 18410515  | C | T | 631 | 62 | 0.09 | 316 | 336 | 0.52 | 361 | 296 | 0.45 | 2 | 2 | 2    | tier3 | shared           | 0 |
| 3 | 184733470 | 183250776 | A | T | 302 | 28 | 0.08 | 201 | 184 | 0.48 | 210 | 183 | 0.47 | 2 | 2 | 2    | tier3 | shared           | 0 |
| 3 | 1887762   | 1912762   | G | A | 664 | 0  | 0.00 | 644 | 0   | 0.00 | 497 | 101 | 0.17 | 2 | 2 | 2    | tier2 | relapse-specific | 0 |
| 3 | 192716310 | 191233616 | C | T | 355 | 17 | 0.05 | 214 | 176 | 0.45 | 232 | 146 | 0.39 | 2 | 2 | 2    | tier3 | shared           | 1 |
| 3 | 194253917 | 192771223 | T | C | 115 | 13 | 0.10 | 58  | 51  | 0.47 | 106 | 87  | 0.45 | 2 | 2 | 2    | tier3 | shared           | 1 |
| 3 | 27672345  | 27697341  | A | G | 726 | 51 | 0.07 | 431 | 409 | 0.49 | 457 | 437 | 0.49 | 2 | 2 | 2    | tier3 | shared           | 0 |
| 3 | 28052846  | 28077842  | G | T | 292 | 16 | 0.05 | 188 | 105 | 0.36 | 152 | 106 | 0.41 | 2 | 2 | 2    | tier3 | shared           | 1 |
| 3 | 30888917  | 30913913  | T | C | 743 | 59 | 0.07 | 486 | 339 | 0.41 | 635 | 176 | 0.22 | 2 | 2 | 2    | tier2 | shared           | 0 |
| 3 | 47328661  | 47353657  | T | G | 432 | 42 | 0.09 | 291 | 204 | 0.41 | 343 | 107 | 0.24 | 2 | 2 | 2    | tier3 | shared           | 1 |
| 3 | 49658255  | 49683251  | C | T | 535 | 40 | 0.07 | 410 | 295 | 0.42 | 549 | 184 | 0.25 | 2 | 2 | 1.24 | tier3 | shared           | 4 |
| 3 | 521376    | 546376    | C | G | 607 | 37 | 0.06 | 344 | 287 | 0.45 | 261 | 248 | 0.49 | 2 | 2 | 2    | tier3 | shared           | 1 |
| 3 | 55017452  | 55042412  | G | T | 541 | 32 | 0.06 | 324 | 235 | 0.42 | 341 | 256 | 0.43 | 2 | 2 | 2    | tier3 | shared           | 3 |
| 3 | 6639859   | 6664859   | C | - | 626 | 31 | 0.05 | 402 | 289 | 0.42 | 358 | 279 | 0.44 | 2 | 2 | 2    | tier3 | shared           | 1 |
| 3 | 71150853  | 71068163  | G | A | 449 | 32 | 0.07 | 288 | 233 | 0.45 | 311 | 236 | 0.43 | 2 | 2 | 2    | tier3 | shared           | 1 |
| 3 | 77764726  | 77682036  | G | A | 580 | 33 | 0.05 | 372 | 239 | 0.39 | 326 | 271 | 0.45 | 2 | 2 | 2    | tier3 | shared           | 2 |
| 3 | 97257279  | 95774589  | A | C | 395 | 28 | 0.07 | 226 | 213 | 0.49 | 267 | 207 | 0.44 | 2 | 2 | 2    | tier3 | shared           | 0 |
| 3 | 98050427  | 96567737  | A | T | 481 | 33 | 0.06 | 278 | 266 | 0.49 | 285 | 216 | 0.43 | 2 | 2 | 2    | tier3 | shared           | 0 |
| 4 | 105371233 | 105151784 | G | T | 477 | 0  | 0.00 | 573 | 0   | 0.00 | 470 | 85  | 0.15 | 2 | 2 | 2    | tier3 | relapse-specific | 1 |
| 4 | 111770497 | 111551048 | A | T | 448 | 0  | 0.00 | 586 | 0   | 0.00 | 549 | 113 | 0.17 | 2 | 2 | 2    | tier3 | relapse-specific | 0 |
| 4 | 114171986 | 113952537 | G | A | 304 | 29 | 0.09 | 198 | 169 | 0.46 | 236 | 162 | 0.41 | 2 | 2 | 2    | tier2 | shared           | 2 |
| 4 | 116142222 | 115922773 | C | T | 127 | 9  | 0.07 | 87  | 43  | 0.33 | 113 | 78  | 0.41 | 2 | 2 | 2    | tier3 | shared           | 0 |
| 4 | 118665245 | 118445797 | G | A | 540 | 28 | 0.05 | 320 | 232 | 0.42 | 314 | 252 | 0.45 | 2 | 2 | 2    | tier3 | shared           | 1 |
| 4 | 120767588 | 120548140 | T | C | 296 | 26 | 0.08 | 144 | 147 | 0.51 | 171 | 135 | 0.44 | 2 | 2 | 2    | tier2 | shared           | 0 |
| 4 | 12162420  | 12553322  | C | A | 335 | 36 | 0.10 | 275 | 189 | 0.41 | 295 | 204 | 0.41 | 2 | 2 | 2    | tier3 | shared           | 1 |
| 4 | 127318827 | 127099377 | T | A | 505 | 37 | 0.07 | 300 | 234 | 0.44 | 271 | 208 | 0.43 | 2 | 2 | 2    | tier3 | shared           | 1 |
| 4 | 127858528 | 127639078 | C | T | 387 | 24 | 0.06 | 210 | 143 | 0.41 | 216 | 142 | 0.40 | 2 | 2 | 2    | tier3 | shared           | 1 |
| 4 | 136684198 | 136464748 | T | A | 381 | 28 | 0.07 | 204 | 158 | 0.44 | 206 | 164 | 0.44 | 2 | 2 | 2    | tier3 | shared           | 1 |
| 4 | 137387938 | 137168488 | T | A | 672 | 3  | 0.00 | 675 | 0   | 0.00 | 483 | 100 | 0.17 | 2 | 2 | 2    | tier2 | relapse-specific | 1 |
| 4 | 137620857 | 137401407 | A | T | 613 | 0  | 0.00 | 544 | 0   | 0.00 | 437 | 106 | 0.20 | 2 | 2 | 2    | tier3 | relapse-specific | 1 |
| 4 | 143682965 | 143463515 | T | C | 622 | 45 | 0.07 | 341 | 325 | 0.49 | 386 | 309 | 0.44 | 2 | 2 | 2    | tier3 | shared           | 0 |
| 4 | 150194373 | 149974923 | T | C | 496 | 36 | 0.07 | 313 | 271 | 0.46 | 354 | 282 | 0.44 | 2 | 2 | 2    | tier3 | shared           | 1 |
| 4 | 156270550 | 156051100 | C | A | 546 | 43 | 0.07 | 353 | 287 | 0.45 | 381 | 286 | 0.43 | 2 | 2 | 2    | tier3 | shared           | 1 |
| 4 | 156831276 | 156611826 | T | C | 584 | 36 | 0.06 | 349 | 321 | 0.48 | 381 | 311 | 0.45 | 2 | 2 | 2    | tier3 | shared           | 0 |
| 4 | 160132121 | 159912671 | G | A | 458 | 1  | 0.00 | 491 | 0   | 0.00 | 482 | 48  | 0.09 | 2 | 2 | 2    | tier3 | relapse-specific | 0 |
| 4 | 163286595 | 163067145 | G | C | 340 | 30 | 0.08 | 292 | 178 | 0.38 | 283 | 119 | 0.30 | 2 | 2 | 2    | tier3 | shared           | 0 |
| 4 | 164404685 | 164185235 | G | T | 430 | 25 | 0.05 | 293 | 218 | 0.43 | 244 | 194 | 0.44 | 2 | 2 | 2    | tier3 | shared           | 1 |
| 4 | 168154262 | 167917687 | A | T | 498 | 48 | 0.09 | 331 | 282 | 0.46 | 336 | 263 | 0.44 | 2 | 2 | 2    | tier3 | shared           | 0 |
| 4 | 173558482 | 173321907 | G | A | 596 | 62 | 0.09 | 398 | 328 | 0.45 | 514 | 191 | 0.27 | 2 | 2 | 2    | tier3 | shared           | 1 |
| 4 | 179613086 | 179376092 | C | T | 418 | 31 | 0.07 | 291 | 233 | 0.44 | 283 | 232 | 0.45 | 2 | 2 | 2    | tier3 | shared           | 0 |

|   |           |           |   |      |     |    |      |     |     |      |     |     |      |   |   |      |       |                  |   |
|---|-----------|-----------|---|------|-----|----|------|-----|-----|------|-----|-----|------|---|---|------|-------|------------------|---|
| 4 | 180900918 | 180663924 | G | C    | 426 | 0  | 0.00 | 386 | 0   | 0.00 | 288 | 68  | 0.19 | 2 | 2 | 2    | tier3 | relapse-specific | 1 |
| 4 | 183840022 | 183603028 | C | T    | 386 | 0  | 0.00 | 435 | 0   | 0.00 | 401 | 39  | 0.09 | 2 | 2 | 2    | tier1 | relapse-specific | 2 |
| 4 | 187430712 | 187193718 | T | C    | 449 | 27 | 0.06 | 232 | 197 | 0.46 | 233 | 187 | 0.45 | 2 | 2 | 2    | tier3 | shared           | 0 |
| 4 | 188219693 | 187982699 | C | A    | 500 | 39 | 0.07 | 414 | 310 | 0.43 | 383 | 325 | 0.46 | 2 | 2 | 2    | tier3 | shared           | 1 |
| 4 | 188388493 | 188151499 | T | C    | 681 | 58 | 0.08 | 311 | 276 | 0.47 | 334 | 277 | 0.45 | 2 | 2 | 2    | tier3 | shared           | 1 |
| 4 | 188615824 | 188378830 | C | A    | 496 | 37 | 0.07 | 242 | 209 | 0.46 | 225 | 190 | 0.46 | 2 | 2 | 2    | tier2 | shared           | 1 |
| 4 | 19892326  | 20283228  | C | A    | 383 | 24 | 0.06 | 242 | 191 | 0.44 | 302 | 109 | 0.27 | 2 | 2 | 2    | tier2 | shared           | 1 |
| 4 | 20084861  | 20475763  | G | A    | 313 | 0  | 0.00 | 307 | 0   | 0.00 | 302 | 70  | 0.19 | 2 | 2 | 2    | tier2 | relapse-specific | 1 |
| 4 | 20218150  | 20609052  | A | G    | 387 | 33 | 0.08 | 211 | 191 | 0.48 | 251 | 218 | 0.46 | 2 | 2 | 2    | tier3 | shared           | 1 |
| 4 | 23382337  | 23773239  | G | C    | 491 | 37 | 0.07 | 305 | 304 | 0.50 | 295 | 262 | 0.47 | 2 | 2 | 2    | tier3 | shared           | 0 |
| 4 | 25244945  | 25635847  | G | A    | 468 | 43 | 0.08 | 248 | 225 | 0.48 | 234 | 241 | 0.51 | 2 | 2 | 2    | tier2 | shared           | 1 |
| 4 | 30772025  | 31162927  | C | T    | 623 | 2  | 0.00 | 721 | 0   | 0.00 | 631 | 104 | 0.14 | 2 | 2 | 2    | tier3 | relapse-specific | 0 |
| 4 | 31398117  | 31789019  | A | T    | 536 | 0  | 0.00 | 482 | 1   | 0.00 | 388 | 66  | 0.15 | 2 | 2 | 2    | tier3 | relapse-specific | 1 |
| 4 | 33816693  | 34140298  | A | T    | 424 | 43 | 0.09 | 250 | 246 | 0.50 | 258 | 245 | 0.49 | 2 | 2 | 2    | tier3 | shared           | 1 |
| 4 | 34558019  | 34881624  | T | A    | 299 | 19 | 0.06 | 132 | 115 | 0.47 | 170 | 76  | 0.31 | 2 | 2 | 2    | tier3 | shared           | 1 |
| 4 | 44889709  | 45194952  | A | T    | 705 | 53 | 0.07 | 388 | 305 | 0.44 | 320 | 261 | 0.45 | 2 | 2 | 2    | tier3 | shared           | 1 |
| 4 | 45315673  | 45620916  | G | C    | 539 | 26 | 0.05 | 247 | 224 | 0.48 | 271 | 228 | 0.46 | 2 | 2 | 2    | tier3 | shared           | 1 |
| 4 | 60568584  | 60885989  | T | A    | 626 | 7  | 0.01 | 521 | 79  | 0.13 | 553 | 49  | 0.08 | 2 | 2 | 2    | tier3 | shared           | 1 |
| 4 | 60649951  | 60967356  | - | A    | 204 | 10 | 0.05 | 95  | 94  | 0.50 | 119 | 104 | 0.47 | 2 | 2 | 2    | tier3 | shared           | 1 |
| 4 | 63476465  | 63793870  | T | A    | 465 | 39 | 0.08 | 315 | 234 | 0.43 | 318 | 235 | 0.42 | 2 | 2 | 2    | tier3 | shared           | 1 |
| 4 | 64442423  | 64759828  | C | A    | 640 | 14 | 0.02 | 702 | 95  | 0.12 | 728 | 75  | 0.09 | 2 | 2 | 2    | tier2 | shared           | 1 |
| 4 | 75410336  | 75191472  | G | A    | 538 | 26 | 0.05 | 344 | 245 | 0.42 | 396 | 158 | 0.29 | 2 | 2 | 2    | tier3 | shared           | 0 |
| 4 | 93687647  | 93468624  | G | A    | 492 | 0  | 0.00 | 371 | 4   | 0.01 | 275 | 67  | 0.20 | 2 | 2 | 2    | tier3 | relapse-specific | 0 |
| 4 | 94623821  | 94404798  | T | G    | 495 | 46 | 0.09 | 329 | 295 | 0.47 | 308 | 238 | 0.44 | 2 | 2 | 2    | tier3 | shared           | 0 |
| 4 | 96814327  | 96595304  | A | C    | 482 | 0  | 0.00 | 524 | 0   | 0.00 | 394 | 61  | 0.13 | 2 | 2 | 2    | tier3 | relapse-specific | 1 |
| 5 | 104913612 | 104885713 | G | A    | 502 | 46 | 0.08 | 313 | 268 | 0.46 | 315 | 241 | 0.43 | 2 | 2 | 2    | tier3 | shared           | 1 |
| 5 | 105981162 | 105953263 | G | A    | 447 | 29 | 0.06 | 303 | 209 | 0.41 | 242 | 198 | 0.45 | 2 | 2 | 2    | tier3 | shared           | 1 |
| 5 | 111485540 | 111457641 | G | A    | 582 | 48 | 0.08 | 306 | 275 | 0.47 | 385 | 270 | 0.41 | 2 | 2 | 2    | tier3 | shared           | 0 |
| 5 | 114558242 | 114530343 | - | TATG | 430 | 21 | 0.05 | 258 | 187 | 0.42 | 366 | 133 | 0.27 | 2 | 2 | 2    | tier3 | shared           | 0 |
| 5 | 116451537 | 116423638 | T | -    | 531 | 42 | 0.07 | 343 | 284 | 0.45 | 319 | 226 | 0.41 | 2 | 2 | 2    | tier3 | shared           | 1 |
| 5 | 121598522 | 121570623 | G | A    | 608 | 39 | 0.06 | 316 | 263 | 0.45 | 335 | 275 | 0.45 | 2 | 2 | 2    | tier3 | shared           | 1 |
| 5 | 122343970 | 122316071 | G | C    | 431 | 4  | 0.01 | 327 | 46  | 0.12 | 389 | 44  | 0.10 | 2 | 2 | 2    | tier2 | shared           | 0 |
| 5 | 134701238 | 134673339 | T | C    | 470 | 38 | 0.07 | 265 | 240 | 0.48 | 292 | 205 | 0.41 | 2 | 2 | 2    | tier3 | shared           | 0 |
| 5 | 139035635 | 139055451 | C | G    | 450 | 0  | 0.00 | 551 | 0   | 0.00 | 391 | 81  | 0.17 | 2 | 2 | 1.37 | tier3 | relapse-specific | 0 |
| 5 | 159299585 | 159367007 | C | T    | 609 | 37 | 0.06 | 364 | 301 | 0.45 | 393 | 309 | 0.44 | 2 | 2 | 2    | tier3 | shared           | 0 |
| 5 | 163921776 | 163989198 | G | A    | 413 | 0  | 0.00 | 477 | 1   | 0.00 | 335 | 62  | 0.16 | 2 | 2 | 2    | tier3 | relapse-specific | 1 |
| 5 | 168146460 | 168213882 | C | T    | 436 | 33 | 0.07 | 320 | 243 | 0.43 | 343 | 278 | 0.45 | 2 | 2 | 2    | tier3 | shared           | 0 |
| 5 | 169360334 | 169427756 | A | C    | 458 | 39 | 0.08 | 321 | 278 | 0.46 | 371 | 292 | 0.44 | 2 | 2 | 2    | tier3 | shared           | 2 |
| 5 | 179375837 | 179443231 | A | T    | 289 | 29 | 0.09 | 191 | 172 | 0.47 | 199 | 171 | 0.46 | 2 | 2 | 2    | tier3 | shared           | 0 |
| 5 | 21248739  | 21212982  | G | C    | 653 | 0  | 0.00 | 664 | 1   | 0.00 | 455 | 124 | 0.21 | 2 | 2 | 2    | tier3 | relapse-specific | 1 |

|   |           |           |      |   |     |    |      |     |     |      |     |     |      |   |   |   |       |                  |   |
|---|-----------|-----------|------|---|-----|----|------|-----|-----|------|-----|-----|------|---|---|---|-------|------------------|---|
| 5 | 22482248  | 22446491  | C    | A | 600 | 0  | 0.00 | 670 | 0   | 0.00 | 521 | 116 | 0.18 | 2 | 2 | 2 | tier3 | relapse-specific | 0 |
| 5 | 22495984  | 22460227  | G    | A | 547 | 0  | 0.00 | 367 | 0   | 0.00 | 297 | 68  | 0.19 | 2 | 2 | 2 | tier3 | relapse-specific | 0 |
| 5 | 22744459  | 22708702  | G    | T | 476 | 0  | 0.00 | 499 | 0   | 0.00 | 381 | 77  | 0.17 | 2 | 2 | 2 | tier3 | relapse-specific | 0 |
| 5 | 22951039  | 22915282  | C    | T | 752 | 48 | 0.06 | 395 | 285 | 0.42 | 575 | 204 | 0.26 | 2 | 2 | 2 | tier2 | shared           | 1 |
| 5 | 2610120   | 2557120   | C    | A | 687 | 49 | 0.07 | 450 | 343 | 0.43 | 418 | 312 | 0.43 | 2 | 2 | 2 | tier3 | shared           | 1 |
| 5 | 35263858  | 35228101  | T    | C | 610 | 52 | 0.08 | 325 | 284 | 0.47 | 338 | 302 | 0.47 | 2 | 2 | 2 | tier3 | shared           | 0 |
| 5 | 45004983  | 44969226  | G    | T | 545 | 0  | 0.00 | 566 | 1   | 0.00 | 439 | 61  | 0.12 | 2 | 2 | 2 | tier3 | relapse-specific | 1 |
| 5 | 5737274   | 5684274   | G    | A | 455 | 39 | 0.08 | 303 | 217 | 0.42 | 361 | 161 | 0.31 | 2 | 2 | 2 | tier3 | shared           | 1 |
| 5 | 62068029  | 62032273  | A    | G | 661 | 42 | 0.06 | 394 | 378 | 0.49 | 423 | 321 | 0.43 | 2 | 2 | 2 | tier3 | shared           | 0 |
| 5 | 85909652  | 85873896  | T    | A | 480 | 25 | 0.05 | 258 | 158 | 0.38 | 339 | 118 | 0.26 | 2 | 2 | 2 | tier3 | shared           | 0 |
| 5 | 95646381  | 95620625  | A    | C | 493 | 42 | 0.08 | 285 | 225 | 0.44 | 311 | 233 | 0.43 | 2 | 2 | 2 | tier3 | shared           | 1 |
| 6 | 103521248 | 103414555 | C    | A | 244 | 0  | 0.00 | 224 | 0   | 0.00 | 147 | 23  | 0.14 | 2 | 2 | 2 | tier3 | relapse-specific | 0 |
| 6 | 106364146 | 106257453 | C    | A | 410 | 27 | 0.06 | 269 | 260 | 0.49 | 296 | 247 | 0.45 | 2 | 2 | 2 | tier3 | shared           | 1 |
| 6 | 113063678 | 112956985 | A    | T | 257 | 12 | 0.04 | 145 | 135 | 0.48 | 107 | 121 | 0.53 | 2 | 2 | 2 | tier3 | shared           | 0 |
| 6 | 124532802 | 124491103 | A    | G | 297 | 35 | 0.11 | 224 | 163 | 0.42 | 222 | 197 | 0.47 | 2 | 2 | 2 | tier3 | shared           | 0 |
| 6 | 128083405 | 128041712 | A    | C | 496 | 41 | 0.08 | 303 | 220 | 0.42 | 349 | 130 | 0.27 | 2 | 2 | 2 | tier3 | shared           | 0 |
| 6 | 128515520 | 128473827 | A    | G | 519 | 1  | 0.00 | 507 | 0   | 0.00 | 402 | 87  | 0.18 | 2 | 2 | 2 | tier3 | relapse-specific | 0 |
| 6 | 134270886 | 134229193 | G    | A | 370 | 32 | 0.08 | 212 | 178 | 0.46 | 309 | 217 | 0.41 | 2 | 2 | 2 | tier3 | shared           | 0 |
| 6 | 134865892 | 134824199 | G    | A | 302 | 32 | 0.10 | 213 | 204 | 0.49 | 205 | 121 | 0.37 | 2 | 2 | 2 | tier3 | shared           | 1 |
| 6 | 135582876 | 135541183 | ATTC | - | 502 | 26 | 0.05 | 324 | 242 | 0.43 | 350 | 270 | 0.44 | 2 | 2 | 2 | tier3 | shared           | 0 |
| 6 | 139410524 | 139368831 | G    | A | 581 | 34 | 0.06 | 380 | 269 | 0.41 | 349 | 259 | 0.43 | 2 | 2 | 2 | tier3 | shared           | 0 |
| 6 | 143431555 | 143389862 | T    | A | 672 | 41 | 0.06 | 368 | 311 | 0.46 | 384 | 312 | 0.45 | 2 | 2 | 2 | tier2 | shared           | 0 |
| 6 | 162058578 | 162138588 | G    | A | 353 | 45 | 0.11 | 219 | 184 | 0.46 | 223 | 200 | 0.47 | 2 | 2 | 2 | tier3 | shared           | 0 |
| 6 | 162536244 | 162616254 | G    | A | 635 | 43 | 0.06 | 358 | 274 | 0.43 | 347 | 264 | 0.43 | 2 | 2 | 2 | tier3 | shared           | 0 |
| 6 | 19427793  | 19319814  | A    | T | 560 | 51 | 0.08 | 364 | 311 | 0.46 | 380 | 281 | 0.43 | 2 | 2 | 2 | tier3 | shared           | 0 |
| 6 | 20902367  | 20794388  | C    | A | 394 | 1  | 0.00 | 357 | 0   | 0.00 | 304 | 44  | 0.13 | 2 | 2 | 2 | tier3 | relapse-specific | 0 |
| 6 | 322235    | 377235    | T    | G | 631 | 34 | 0.05 | 548 | 198 | 0.27 | 533 | 174 | 0.25 | 2 | 2 | 2 | tier3 | shared           | 0 |
| 6 | 50040060  | 49932101  | T    | A | 478 | 0  | 0.00 | 592 | 0   | 0.00 | 415 | 74  | 0.15 | 2 | 2 | 2 | tier3 | relapse-specific | 0 |
| 6 | 51747125  | 51639166  | G    | A | 487 | 39 | 0.07 | 300 | 216 | 0.42 | 281 | 242 | 0.46 | 2 | 2 | 2 | tier3 | shared           | 4 |
| 6 | 66897241  | 66840520  | T    | C | 943 | 0  | 0.00 | 832 | 1   | 0.00 | 663 | 145 | 0.18 | 2 | 2 | 2 | tier3 | relapse-specific | 0 |
| 6 | 71062197  | 71005476  | A    | G | 590 | 42 | 0.07 | 361 | 285 | 0.44 | 370 | 299 | 0.45 | 2 | 2 | 2 | tier3 | shared           | 1 |
| 6 | 77165181  | 77108461  | T    | G | 364 | 22 | 0.06 | 181 | 160 | 0.47 | 214 | 183 | 0.46 | 2 | 2 | 2 | tier3 | shared           | 1 |
| 6 | 83476188  | 83419469  | C    | T | 380 | 41 | 0.10 | 205 | 164 | 0.44 | 213 | 178 | 0.46 | 2 | 2 | 2 | tier3 | shared           | 1 |
| 6 | 87126465  | 87069746  | C    | T | 354 | 0  | 0.00 | 269 | 0   | 0.00 | 296 | 40  | 0.12 | 2 | 2 | 2 | tier3 | relapse-specific | 1 |
| 6 | 91426599  | 91369878  | C    | A | 526 | 34 | 0.06 | 321 | 240 | 0.43 | 292 | 265 | 0.48 | 2 | 2 | 2 | tier3 | shared           | 1 |
| 6 | 91783109  | 91726388  | T    | C | 608 | 37 | 0.06 | 359 | 320 | 0.47 | 351 | 300 | 0.46 | 2 | 2 | 2 | tier3 | shared           | 1 |
| 6 | 93879979  | 93823258  | T    | C | 636 | 63 | 0.09 | 434 | 370 | 0.46 | 478 | 392 | 0.45 | 2 | 2 | 2 | tier3 | shared           | 0 |
| 6 | 94961835  | 94905114  | A    | G | 658 | 0  | 0.00 | 717 | 1   | 0.00 | 505 | 126 | 0.20 | 2 | 2 | 2 | tier3 | relapse-specific | 1 |
| 7 | 101354947 | 101568227 | T    | C | 571 | 71 | 0.11 | 338 | 350 | 0.51 | 352 | 342 | 0.49 | 2 | 2 | 2 | tier3 | shared           | 0 |
| 7 | 103870967 | 104083731 | C    | T | 768 | 59 | 0.07 | 436 | 421 | 0.49 | 437 | 350 | 0.44 | 2 | 2 | 2 | tier3 | shared           | 0 |

|   |           |           |   |   |     |    |      |     |     |      |     |     |      |   |      |      |       |                  |   |
|---|-----------|-----------|---|---|-----|----|------|-----|-----|------|-----|-----|------|---|------|------|-------|------------------|---|
| 7 | 114378637 | 114591401 | A | - | 303 | 43 | 0.12 | 211 | 146 | 0.41 | 168 | 136 | 0.45 | 2 | 2    | 2    | tier3 | shared           | 1 |
| 7 | 119556017 | 119768781 | C | T | 316 | 23 | 0.07 | 132 | 87  | 0.40 | 159 | 103 | 0.39 | 2 | 2    | 2    | tier3 | shared           | 1 |
| 7 | 13598141  | 13631616  | C | T | 608 | 1  | 0.00 | 616 | 1   | 0.00 | 553 | 114 | 0.17 | 2 | 2    | 2    | tier3 | relapse-specific | 1 |
| 7 | 139293998 | 139647529 | G | A | 509 | 40 | 0.07 | 311 | 273 | 0.47 | 283 | 201 | 0.42 | 2 | 2    | 2    | tier3 | shared           | 0 |
| 7 | 147006720 | 147375787 | C | T | 548 | 0  | 0.00 | 628 | 0   | 0.00 | 489 | 91  | 0.16 | 2 | 2    | 2    | tier2 | relapse-specific | 0 |
| 7 | 152932208 | 153301275 | G | A | 599 | 1  | 0.00 | 713 | 1   | 0.00 | 563 | 136 | 0.19 | 2 | 2    | 2    | tier3 | relapse-specific | 1 |
| 7 | 153293175 | 153662242 | C | G | 655 | 41 | 0.06 | 404 | 360 | 0.47 | 433 | 322 | 0.43 | 2 | 1.13 | 1.17 | tier2 | shared           | 2 |
| 7 | 153349263 | 153718330 | C | T | 662 | 41 | 0.06 | 364 | 337 | 0.48 | 370 | 322 | 0.47 | 2 | 1.13 | 1.17 | tier2 | shared           | 2 |
| 7 | 156900510 | 157207749 | C | T | 453 | 47 | 0.09 | 283 | 253 | 0.47 | 312 | 272 | 0.47 | 2 | 2    | 2    | tier2 | shared           | 0 |
| 7 | 45879136  | 45912611  | C | T | 259 | 25 | 0.09 | 205 | 168 | 0.45 | 203 | 195 | 0.49 | 2 | 2    | 2    | tier3 | shared           | 0 |
| 7 | 46186467  | 46219942  | A | G | 807 | 60 | 0.07 | 464 | 386 | 0.45 | 437 | 363 | 0.45 | 2 | 2    | 2    | tier3 | shared           | 1 |
| 7 | 47290289  | 47323764  | C | T | 565 | 1  | 0.00 | 568 | 0   | 0.00 | 542 | 106 | 0.16 | 2 | 2    | 2    | tier3 | relapse-specific | 0 |
| 7 | 53100607  | 53133113  | G | A | 665 | 39 | 0.06 | 390 | 285 | 0.42 | 354 | 257 | 0.42 | 2 | 2    | 2    | tier3 | shared           | 1 |
| 7 | 53334730  | 53367236  | A | T | 386 | 18 | 0.04 | 213 | 166 | 0.44 | 257 | 202 | 0.44 | 2 | 2    | 2    | tier2 | shared           | 1 |
| 7 | 53417884  | 53450390  | C | T | 423 | 31 | 0.07 | 286 | 246 | 0.46 | 310 | 229 | 0.42 | 2 | 2    | 2    | tier3 | shared           | 0 |
| 7 | 56078480  | 56110986  | G | C | 586 | 42 | 0.07 | 315 | 257 | 0.45 | 276 | 252 | 0.48 | 2 | 2    | 2    | tier3 | shared           | 0 |
| 7 | 6727252   | 6760727   | A | G | 188 | 15 | 0.07 | 96  | 115 | 0.55 | 127 | 85  | 0.40 | 2 | 2    | 2    | tier1 | shared           | 0 |
| 7 | 67591954  | 67954018  | C | T | 503 | 46 | 0.08 | 266 | 242 | 0.48 | 286 | 224 | 0.44 | 2 | 2    | 2    | tier3 | shared           | 1 |
| 7 | 68773299  | 69135363  | T | C | 503 | 0  | 0.00 | 540 | 0   | 0.00 | 431 | 87  | 0.17 | 2 | 2    | 2    | tier3 | relapse-specific | 0 |
| 7 | 70611382  | 70973446  | C | T | 618 | 54 | 0.08 | 365 | 339 | 0.48 | 365 | 307 | 0.46 | 2 | 2    | 2    | tier3 | shared           | 1 |
| 7 | 81341802  | 81503866  | C | A | 560 | 28 | 0.05 | 321 | 233 | 0.42 | 337 | 254 | 0.43 | 2 | 2    | 2    | tier3 | shared           | 1 |
| 7 | 93194956  | 93357020  | A | T | 509 | 33 | 0.06 | 299 | 253 | 0.46 | 419 | 172 | 0.29 | 2 | 2    | 2    | tier3 | shared           | 1 |
| 7 | 95390896  | 95552960  | T | C | 602 | 50 | 0.08 | 337 | 286 | 0.46 | 356 | 282 | 0.44 | 2 | 2    | 2    | tier3 | shared           | 2 |
| 8 | 102987569 | 102918393 | G | T | 450 | 26 | 0.05 | 298 | 191 | 0.39 | 397 | 180 | 0.31 | 2 | 2    | 2    | tier3 | shared           | 0 |
| 8 | 106308953 | 106239777 | A | G | 508 | 50 | 0.09 | 346 | 283 | 0.45 | 315 | 234 | 0.43 | 2 | 2    | 2    | tier3 | shared           | 1 |
| 8 | 106683844 | 106614668 | G | A | 582 | 42 | 0.07 | 362 | 264 | 0.42 | 279 | 269 | 0.49 | 2 | 2    | 2    | tier3 | shared           | 0 |
| 8 | 10969176  | 10931766  | C | T | 364 | 25 | 0.06 | 232 | 170 | 0.42 | 265 | 207 | 0.44 | 2 | 2    | 2    | tier3 | shared           | 0 |
| 8 | 113468419 | 113399243 | C | G | 787 | 0  | 0.00 | 772 | 0   | 0.00 | 560 | 135 | 0.19 | 2 | 2    | 2    | tier3 | relapse-specific | 2 |
| 8 | 113753710 | 113684534 | C | T | 303 | 25 | 0.08 | 231 | 140 | 0.38 | 201 | 180 | 0.47 | 2 | 2    | 2    | tier3 | shared           | 2 |
| 8 | 117193811 | 117124633 | G | T | 555 | 44 | 0.07 | 279 | 215 | 0.44 | 258 | 233 | 0.47 | 2 | 2    | 2    | tier3 | shared           | 0 |
| 8 | 136160399 | 136091217 | C | T | 541 | 39 | 0.07 | 349 | 285 | 0.45 | 395 | 320 | 0.45 | 2 | 2    | 2    | tier3 | shared           | 1 |
| 8 | 137086395 | 137017213 | G | A | 575 | 48 | 0.08 | 376 | 311 | 0.45 | 365 | 342 | 0.48 | 2 | 2    | 2    | tier2 | shared           | 1 |
| 8 | 140818385 | 140749203 | G | T | 413 | 36 | 0.08 | 377 | 222 | 0.37 | 400 | 112 | 0.22 | 2 | 2    | 2    | tier3 | shared           | 0 |
| 8 | 21825961  | 21770015  | G | A | 218 | 17 | 0.07 | 165 | 135 | 0.45 | 153 | 129 | 0.46 | 2 | 2    | 2    | tier1 | shared           | 1 |
| 8 | 23806889  | 23750944  | C | T | 597 | 0  | 0.00 | 623 | 1   | 0.00 | 526 | 109 | 0.17 | 2 | 2    | 2    | tier2 | relapse-specific | 0 |
| 8 | 34439177  | 34319635  | T | C | 563 | 36 | 0.06 | 302 | 242 | 0.44 | 324 | 243 | 0.43 | 2 | 2    | 2    | tier3 | shared           | 1 |
| 8 | 34836384  | 34716842  | G | A | 513 | 41 | 0.07 | 332 | 303 | 0.48 | 418 | 334 | 0.44 | 2 | 2    | 2    | tier3 | shared           | 1 |
| 8 | 35087183  | 34967641  | G | A | 468 | 26 | 0.05 | 362 | 166 | 0.31 | 452 | 133 | 0.23 | 2 | 2    | 2    | tier3 | shared           | 1 |
| 8 | 35569037  | 35449495  | G | A | 455 | 34 | 0.07 | 350 | 235 | 0.40 | 482 | 179 | 0.27 | 2 | 2    | 2    | tier3 | shared           | 1 |
| 8 | 40348835  | 40229678  | G | A | 519 | 58 | 0.10 | 324 | 350 | 0.52 | 385 | 318 | 0.45 | 2 | 2    | 2    | tier3 | shared           | 1 |

|   |           |           |   |   |     |    |      |     |     |      |     |     |      |   |   |      |       |                  |   |
|---|-----------|-----------|---|---|-----|----|------|-----|-----|------|-----|-----|------|---|---|------|-------|------------------|---|
| 8 | 40824826  | 40705669  | A | C | 510 | 55 | 0.10 | 342 | 351 | 0.51 | 334 | 363 | 0.52 | 2 | 2 | 2    | tier3 | shared           | 0 |
| 8 | 4788849   | 4801441   | C | T | 535 | 0  | 0.00 | 477 | 0   | 0.00 | 441 | 83  | 0.16 | 2 | 2 | 2    | tier3 | relapse-specific | 5 |
| 8 | 52491260  | 52328707  | T | C | 570 | 47 | 0.08 | 320 | 232 | 0.42 | 318 | 213 | 0.40 | 2 | 2 | 2    | tier3 | shared           | 1 |
| 8 | 52967075  | 52804522  | A | G | 550 | 34 | 0.06 | 325 | 253 | 0.44 | 327 | 255 | 0.44 | 2 | 2 | 2    | tier3 | shared           | 0 |
| 8 | 54298129  | 54135576  | C | T | 630 | 39 | 0.06 | 378 | 294 | 0.44 | 393 | 287 | 0.42 | 2 | 2 | 2    | tier3 | shared           | 0 |
| 8 | 55535827  | 55373274  | C | T | 360 | 28 | 0.07 | 253 | 197 | 0.44 | 227 | 221 | 0.49 | 2 | 2 | 2    | tier2 | shared           | 0 |
| 8 | 62949307  | 62786753  | C | T | 466 | 31 | 0.06 | 237 | 203 | 0.46 | 308 | 108 | 0.26 | 2 | 2 | 2    | tier3 | shared           | 1 |
| 8 | 68841305  | 68678751  | G | A | 663 | 61 | 0.08 | 404 | 338 | 0.46 | 390 | 326 | 0.46 | 2 | 2 | 2    | tier3 | shared           | 0 |
| 8 | 72669371  | 72506817  | C | T | 571 | 47 | 0.08 | 377 | 270 | 0.42 | 343 | 278 | 0.45 | 2 | 2 | 2    | tier3 | shared           | 0 |
| 8 | 75296736  | 75134182  | C | T | 629 | 39 | 0.06 | 411 | 297 | 0.42 | 391 | 291 | 0.43 | 2 | 2 | 2    | tier3 | shared           | 0 |
| 8 | 78108824  | 77946269  | G | T | 443 | 28 | 0.06 | 289 | 240 | 0.45 | 273 | 279 | 0.51 | 2 | 2 | 2    | tier3 | shared           | 0 |
| 8 | 86583060  | 86395808  | G | A | 521 | 42 | 0.07 | 271 | 223 | 0.45 | 296 | 187 | 0.39 | 2 | 2 | 2    | tier3 | shared           | 0 |
| 8 | 87369705  | 87300589  | C | A | 642 | 56 | 0.08 | 324 | 262 | 0.45 | 353 | 291 | 0.45 | 2 | 2 | 2    | tier3 | shared           | 1 |
| 9 | 101227880 | 102188059 | T | C | 445 | 54 | 0.11 | 322 | 326 | 0.50 | 315 | 264 | 0.46 | 2 | 2 | 2    | tier3 | shared           | 1 |
| 9 | 104675905 | 105636084 | C | A | 409 | 26 | 0.06 | 251 | 211 | 0.46 | 270 | 210 | 0.44 | 2 | 2 | 2    | tier3 | shared           | 0 |
| 9 | 104746086 | 105706265 | C | T | 404 | 36 | 0.08 | 285 | 217 | 0.43 | 235 | 199 | 0.46 | 2 | 2 | 2    | tier3 | shared           | 0 |
| 9 | 11505134  | 11515134  | C | T | 670 | 41 | 0.06 | 389 | 356 | 0.48 | 455 | 369 | 0.45 | 2 | 2 | 2    | tier3 | shared           | 1 |
| 9 | 116137165 | 117097344 | T | C | 568 | 40 | 0.07 | 354 | 249 | 0.41 | 315 | 253 | 0.45 | 2 | 2 | 2    | tier3 | shared           | 0 |
| 9 | 12110080  | 12120080  | A | T | 650 | 0  | 0.00 | 602 | 0   | 0.00 | 475 | 102 | 0.18 | 2 | 2 | 2    | tier3 | relapse-specific | 1 |
| 9 | 123698954 | 124659133 | G | C | 490 | 42 | 0.08 | 307 | 255 | 0.45 | 334 | 247 | 0.43 | 2 | 2 | 2    | tier2 | shared           | 0 |
| 9 | 12812544  | 12822544  | T | G | 379 | 36 | 0.09 | 254 | 188 | 0.43 | 302 | 127 | 0.30 | 2 | 2 | 2    | tier3 | shared           | 0 |
| 9 | 13336920  | 13346920  | C | G | 386 | 28 | 0.07 | 242 | 235 | 0.49 | 234 | 198 | 0.46 | 2 | 2 | 2    | tier2 | shared           | 0 |
| 9 | 135631789 | 136641968 | C | T | 352 | 14 | 0.04 | 314 | 65  | 0.17 | 343 | 55  | 0.14 | 2 | 2 | 1.24 | tier3 | shared           | 0 |
| 9 | 137624434 | 138484613 | G | A | 289 | 19 | 0.06 | 247 | 177 | 0.42 | 246 | 166 | 0.40 | 2 | 2 | 1.38 | tier3 | shared           | 0 |
| 9 | 16618272  | 16628272  | G | A | 603 | 34 | 0.05 | 368 | 272 | 0.43 | 337 | 273 | 0.45 | 2 | 2 | 2    | tier2 | shared           | 1 |
| 9 | 23743424  | 23753424  | A | - | 365 | 32 | 0.08 | 200 | 129 | 0.39 | 149 | 133 | 0.47 | 2 | 2 | 2    | tier3 | shared           | 0 |
| 9 | 27976160  | 27986160  | A | - | 197 | 16 | 0.08 | 128 | 84  | 0.40 | 103 | 88  | 0.46 | 2 | 2 | 2    | tier3 | shared           | 1 |
| 9 | 28701959  | 28711959  | C | T | 483 | 0  | 0.00 | 498 | 3   | 0.01 | 419 | 92  | 0.18 | 2 | 2 | 2    | tier2 | relapse-specific | 1 |
| 9 | 30009260  | 30019260  | C | A | 496 | 0  | 0.00 | 508 | 0   | 0.00 | 397 | 81  | 0.17 | 2 | 2 | 2    | tier3 | relapse-specific | 1 |
| 9 | 35205813  | 35215813  | G | A | 499 | 45 | 0.08 | 293 | 225 | 0.43 | 334 | 259 | 0.44 | 2 | 2 | 2    | tier2 | shared           | 0 |
| 9 | 7577987   | 7587987   | T | C | 802 | 44 | 0.05 | 476 | 361 | 0.43 | 403 | 269 | 0.40 | 2 | 2 | 2    | tier3 | shared           | 0 |
| 9 | 8463921   | 8473921   | C | T | 631 | 34 | 0.05 | 382 | 295 | 0.44 | 392 | 310 | 0.44 | 2 | 2 | 2    | tier3 | shared           | 1 |
| 9 | 87534973  | 88345153  | A | G | 587 | 34 | 0.05 | 371 | 316 | 0.46 | 421 | 315 | 0.43 | 2 | 2 | 2    | tier3 | shared           | 0 |
| X | 103800606 | 103913950 | A | C | 638 | 51 | 0.07 | 381 | 308 | 0.45 | 364 | 325 | 0.47 | 2 | 2 | 2    | tier3 | shared           | 0 |
| X | 116745872 | 116861844 | G | A | 652 | 0  | 0.00 | 627 | 0   | 0.00 | 594 | 113 | 0.16 | 2 | 2 | 2    | tier3 | relapse-specific | 1 |
| X | 121043753 | 121216072 | - | T | 337 | 28 | 0.08 | 169 | 116 | 0.41 | 153 | 94  | 0.38 | 2 | 2 | 2    | tier3 | shared           | 1 |
| X | 123308435 | 123480754 | C | T | 227 | 1  | 0.00 | 262 | 0   | 0.00 | 293 | 18  | 0.06 | 2 | 2 | 2    | tier3 | relapse-specific | 0 |
| X | 123754185 | 123926504 | C | G | 553 | 41 | 0.07 | 285 | 227 | 0.44 | 242 | 183 | 0.43 | 2 | 2 | 2    | tier2 | shared           | 0 |
| X | 125327309 | 125499628 | T | A | 565 | 39 | 0.06 | 335 | 230 | 0.41 | 487 | 130 | 0.21 | 2 | 2 | 2    | tier2 | shared           | 1 |
| X | 13117926  | 13208005  | G | A | 372 | 33 | 0.08 | 208 | 159 | 0.43 | 184 | 154 | 0.46 | 2 | 2 | 2    | tier3 | shared           | 1 |

|   |           |           |   |   |     |    |      |     |     |      |     |     |      |   |      |      |       |                  |   |
|---|-----------|-----------|---|---|-----|----|------|-----|-----|------|-----|-----|------|---|------|------|-------|------------------|---|
| X | 134306458 | 134478792 | G | A | 232 | 15 | 0.06 | 159 | 139 | 0.47 | 82  | 78  | 0.49 | 2 | 2    | 2    | tier2 | shared           | 0 |
| X | 141821257 | 141993591 | G | A | 565 | 28 | 0.05 | 306 | 285 | 0.48 | 336 | 246 | 0.42 | 2 | 2    | 2    | tier2 | shared           | 0 |
| X | 141903775 | 142076109 | G | T | 635 | 51 | 0.07 | 335 | 314 | 0.48 | 417 | 196 | 0.32 | 2 | 2    | 2    | tier3 | shared           | 0 |
| X | 144265100 | 144457408 | T | A | 454 | 31 | 0.06 | 291 | 244 | 0.46 | 309 | 259 | 0.46 | 2 | 2    | 2    | tier3 | shared           | 1 |
| X | 146449310 | 146641618 | A | T | 445 | 27 | 0.06 | 239 | 179 | 0.43 | 252 | 200 | 0.44 | 2 | 2    | 2    | tier3 | shared           | 0 |
| X | 147945673 | 148137957 | G | C | 512 | 57 | 0.10 | 335 | 259 | 0.44 | 342 | 263 | 0.43 | 2 | 2    | 2    | tier2 | shared           | 0 |
| X | 21537732  | 21627811  | T | C | 366 | 33 | 0.08 | 250 | 240 | 0.49 | 237 | 195 | 0.45 | 2 | 2    | 2    | tier3 | shared           | 0 |
| X | 21592423  | 21682502  | A | T | 581 | 42 | 0.07 | 332 | 284 | 0.46 | 324 | 305 | 0.48 | 2 | 2    | 2    | tier3 | shared           | 0 |
| X | 23373203  | 23463282  | C | T | 643 | 2  | 0.00 | 545 | 0   | 0.00 | 470 | 76  | 0.14 | 2 | 2    | 2    | tier3 | relapse-specific | 0 |
| X | 26022927  | 26113006  | C | T | 497 | 41 | 0.08 | 282 | 248 | 0.47 | 294 | 248 | 0.46 | 2 | 2    | 2    | tier3 | shared           | 0 |
| X | 27627740  | 27717819  | C | G | 734 | 52 | 0.07 | 419 | 285 | 0.40 | 510 | 169 | 0.25 | 2 | 2    | 2    | tier3 | shared           | 0 |
| X | 29598897  | 29688976  | C | T | 281 | 19 | 0.06 | 228 | 122 | 0.35 | 188 | 150 | 0.44 | 2 | 2    | 2    | tier3 | shared           | 0 |
| X | 32082647  | 32172726  | T | C | 470 | 39 | 0.08 | 318 | 275 | 0.46 | 275 | 232 | 0.46 | 2 | 2    | 2    | tier3 | shared           | 1 |
| X | 32610216  | 32700295  | T | C | 513 | 33 | 0.06 | 368 | 317 | 0.46 | 359 | 308 | 0.46 | 2 | 2    | 2    | tier3 | shared           | 1 |
| X | 34575163  | 34665242  | G | A | 497 | 31 | 0.06 | 341 | 261 | 0.43 | 307 | 268 | 0.47 | 2 | 2    | 2    | tier3 | shared           | 1 |
| X | 34772060  | 34862139  | G | C | 610 | 29 | 0.05 | 279 | 263 | 0.49 | 290 | 231 | 0.44 | 2 | 2    | 2    | tier3 | shared           | 1 |
| X | 39397156  | 39512212  | A | - | 706 | 51 | 0.07 | 414 | 335 | 0.45 | 429 | 285 | 0.40 | 2 | 2    | 2    | tier2 | shared           | 1 |
| X | 50437899  | 50421159  | G | A | 551 | 42 | 0.07 | 373 | 307 | 0.45 | 357 | 312 | 0.47 | 2 | 2    | 2    | tier2 | shared           | 0 |
| X | 6322152   | 6312152   | T | C | 718 | 49 | 0.06 | 492 | 345 | 0.41 | 440 | 352 | 0.44 | 2 | 2    | 2    | tier3 | shared           | 0 |
| X | 7701134   | 7741134   | T | - | 438 | 73 | 0.14 | 262 | 222 | 0.46 | 259 | 150 | 0.37 | 2 | 2    | 2    | tier3 | shared           | 0 |
| X | 87473949  | 87587293  | C | T | 372 | 22 | 0.06 | 192 | 130 | 0.40 | 183 | 155 | 0.46 | 2 | 2    | 2    | tier3 | shared           | 1 |
| X | 88250191  | 88363535  | T | G | 704 | 0  | 0.00 | 717 | 0   | 0.00 | 584 | 105 | 0.15 | 2 | 2    | 2    | tier3 | relapse-specific | 1 |
| X | 89264635  | 89377979  | T | A | 542 | 47 | 0.08 | 323 | 224 | 0.41 | 401 | 154 | 0.28 | 2 | 1.04 | 1.32 | tier3 | shared           | 0 |
| X | 95115225  | 95228569  | G | A | 478 | 38 | 0.07 | 264 | 259 | 0.50 | 283 | 250 | 0.47 | 2 | 2    | 2    | tier1 | shared           | 1 |
| X | 97368810  | 97482154  | T | A | 200 | 0  | 0.00 | 184 | 0   | 0.00 | 235 | 32  | 0.12 | 2 | 2    | 2    | tier3 | relapse-specific | 0 |
| X | 97742789  | 97856133  | T | G | 437 | 36 | 0.08 | 249 | 206 | 0.45 | 262 | 217 | 0.45 | 2 | 2    | 2    | tier3 | shared           | 1 |
| X | 99324803  | 99438147  | C | A | 569 | 40 | 0.07 | 355 | 229 | 0.39 | 342 | 250 | 0.42 | 2 | 2    | 2    | tier3 | shared           | 0 |

**Supplementary Table 6f.** Somatic point mutations and indels from UPN 804168 tumor-relapse pair used for mutation spectrum and clonality analyses. Mutations identified in the relapse sample with <2% allele frequencies in the primary tumor were classified as relapse-specific.

| Chr | Start (NCBI 36) | Start (GRCh37) | Ref                     | Var | NormalRefReads | NormalVarReads | NormalVarFreq | TumorRefReads | TumorVarReads | TumorVarFreq | RelapseRefReads | RelapseVarReads | RelapseVarFreq | NormalCN | TumorCN | RelapseCN | Tier  | Classification   | # of samples recurrent (out of 200) |
|-----|-----------------|----------------|-------------------------|-----|----------------|----------------|---------------|---------------|---------------|--------------|-----------------|-----------------|----------------|----------|---------|-----------|-------|------------------|-------------------------------------|
| 1   | 10885089        | 10962502       | G                       | A   | 273            | 11             | 0.04          | 199           | 175           | 0.47         | 234             | 153             | 0.40           | 2        | 2       | 2         | tier3 | shared           | 1                                   |
| 1   | 109740325       | 109938802      | C                       | T   | 435            | 15             | 0.03          | 171           | 163           | 0.49         | 360             | 230             | 0.39           | 2        | 2       | 2         | tier3 | shared           | 0                                   |
| 1   | 111864509       | 112062986      | T                       | G   | 724            | 0              | 0.00          | 723           | 0             | 0.00         | 782             | 48              | 0.06           | 2        | 2       | 2         | tier3 | relapse-specific | 0                                   |
| 1   | 112653995       | 112852472      | C                       | G   | 475            | 11             | 0.02          | 278           | 204           | 0.42         | 381             | 252             | 0.40           | 2        | 2       | 2         | tier3 | shared           | 1                                   |
| 1   | 150584992       | 152318368      | G                       | A   | 423            | 12             | 0.03          | 173           | 153           | 0.47         | 323             | 196             | 0.38           | 2        | 2       | 2         | tier3 | shared           | 5                                   |
| 1   | 152057953       | 153791329      | G                       | A   | 499            | 16             | 0.03          | 328           | 268           | 0.45         | 421             | 259             | 0.38           | 2        | 2       | 2         | tier1 | shared           | 1                                   |
| 1   | 160968797       | 162702173      | CTTGTCCTTT<br>CAGAACTGG | -   | 354            | 10             | 0.03          | 197           | 202           | 0.51         | 254             | 197             | 0.44           | 2        | 2       | 2         | tier3 | shared           | 2                                   |
| 1   | 166672520       | 168405896      | A                       | G   | 629            | 25             | 0.04          | 367           | 346           | 0.49         | 424             | 282             | 0.40           | 2        | 2       | 2         | tier3 | shared           | 0                                   |
| 1   | 169888177       | 171621554      | C                       | T   | 565            | 26             | 0.04          | 329           | 282           | 0.46         | 391             | 308             | 0.44           | 2        | 2       | 2         | tier1 | shared           | 2                                   |
| 1   | 171107134       | 172840511      | G                       | A   | 635            | 15             | 0.02          | 385           | 344           | 0.47         | 525             | 372             | 0.41           | 2        | 2       | 2         | tier3 | shared           | 0                                   |
| 1   | 172256631       | 173990008      | A                       | G   | 96             | 0              | 0.00          | 48            | 0             | 0.00         | 55              | 10              | 0.15           | 2        | 2       | 2         | tier1 | relapse-specific | 0                                   |
| 1   | 173615438       | 175348815      | G                       | A   | 520            | 20             | 0.04          | 316           | 284           | 0.47         | 418             | 231             | 0.36           | 2        | 2       | 2         | tier1 | shared           | 2                                   |
| 1   | 184998422       | 186731799      | G                       | T   | 459            | 7              | 0.02          | 241           | 198           | 0.45         | 353             | 230             | 0.39           | 2        | 2       | 2         | tier3 | shared           | 1                                   |
| 1   | 185612033       | 187345410      | G                       | A   | 304            | 3              | 0.01          | 211           | 157           | 0.43         | 276             | 184             | 0.40           | 2        | 2       | 2         | tier3 | shared           | 1                                   |
| 1   | 188517385       | 190250762      | T                       | A   | 484            | 16             | 0.03          | 194           | 164           | 0.46         | 309             | 194             | 0.39           | 2        | 2       | 2         | tier1 | shared           | 5                                   |
| 1   | 199603019       | 201336396      | C                       | T   | 389            | 11             | 0.03          | 258           | 160           | 0.38         | 254             | 174             | 0.41           | 2        | 2       | 2         | tier2 | shared           | 0                                   |
| 1   | 209220288       | 211153665      | T                       | A   | 846            | 26             | 0.03          | 442           | 382           | 0.46         | 556             | 378             | 0.40           | 2        | 2       | 2         | tier3 | shared           | 0                                   |
| 1   | 209581055       | 211514432      | C                       | G   | 512            | 16             | 0.03          | 311           | 257           | 0.45         | 439             | 266             | 0.38           | 2        | 2       | 2         | tier2 | shared           | 0                                   |
| 1   | 211721326       | 213654703      | T                       | C   | 468            | 19             | 0.04          | 220           | 174           | 0.44         | 345             | 266             | 0.44           | 2        | 2       | 2         | tier3 | shared           | 0                                   |
| 1   | 212507817       | 214441194      | G                       | A   | 598            | 14             | 0.02          | 276           | 234           | 0.46         | 441             | 276             | 0.38           | 2        | 2       | 2         | tier3 | shared           | 0                                   |
| 1   | 214318465       | 216251842      | C                       | T   | 431            | 12             | 0.03          | 200           | 145           | 0.42         | 355             | 182             | 0.34           | 2        | 2       | 2         | tier3 | shared           | 2                                   |
| 1   | 217976850       | 219910227      | G                       | T   | 490            | 7              | 0.01          | 248           | 211           | 0.46         | 392             | 250             | 0.39           | 2        | 2       | 2         | tier3 | shared           | 0                                   |
| 1   | 218552672       | 220486049      | C                       | T   | 450            | 12             | 0.03          | 286           | 236           | 0.45         | 396             | 234             | 0.37           | 2        | 2       | 2         | tier3 | shared           | 0                                   |
| 1   | 223794404       | 225727781      | G                       | A   | 242            | 8              | 0.03          | 105           | 63            | 0.38         | 216             | 117             | 0.35           | 2        | 2       | 2         | tier3 | shared           | 0                                   |
| 1   | 231187565       | 233120942      | G                       | T   | 364            | 10             | 0.03          | 208           | 176           | 0.46         | 214             | 190             | 0.47           | 2        | 2       | 2         | tier3 | shared           | 0                                   |
| 1   | 231529190       | 233462567      | C                       | T   | 399            | 15             | 0.04          | 231           | 184           | 0.44         | 302             | 203             | 0.40           | 2        | 2       | 2         | tier3 | shared           | 0                                   |
| 1   | 239744232       | 241677609      | C                       | T   | 657            | 28             | 0.04          | 370           | 241           | 0.39         | 488             | 316             | 0.39           | 2        | 2       | 2         | tier3 | shared           | 0                                   |
| 1   | 26254970        | 26382383       | G                       | A   | 586            | 20             | 0.03          | 384           | 307           | 0.44         | 454             | 299             | 0.40           | 2        | 2       | 2         | tier2 | shared           | 0                                   |
| 1   | 27926031        | 28053444       | C                       | T   | 469            | 0              | 0.00          | 521           | 29            | 0.05         | 465             | 145             | 0.24           | 2        | 2       | 2         | tier3 | shared           | 0                                   |



|    |           |           |   |   |     |    |      |     |     |      |     |     |      |   |   |   |       |                  |   |
|----|-----------|-----------|---|---|-----|----|------|-----|-----|------|-----|-----|------|---|---|---|-------|------------------|---|
| 1  | 38451053  | 38678466  | A | G | 625 | 17 | 0.03 | 380 | 355 | 0.48 | 525 | 328 | 0.38 | 2 | 2 | 2 | tier3 | shared           | 1 |
| 1  | 40001674  | 40229087  | C | T | 60  | 7  | 0.10 | 9   | 68  | 0.88 | 15  | 78  | 0.84 | 2 | 2 | 2 | tier3 | shared           | 0 |
| 1  | 4391034   | 4491174   | C | T | 582 | 19 | 0.03 | 341 | 264 | 0.44 | 460 | 288 | 0.39 | 2 | 2 | 2 | tier3 | shared           | 0 |
| 1  | 51547674  | 51775086  | C | A | 381 | 14 | 0.04 | 212 | 177 | 0.46 | 310 | 173 | 0.36 | 2 | 2 | 2 | tier1 | shared           | 2 |
| 1  | 5822320   | 5899733   | A | C | 493 | 14 | 0.03 | 345 | 214 | 0.38 | 417 | 258 | 0.38 | 2 | 2 | 2 | tier3 | shared           | 1 |
| 1  | 61323152  | 61550564  | G | A | 458 | 6  | 0.01 | 250 | 129 | 0.34 | 317 | 203 | 0.39 | 2 | 2 | 2 | tier2 | shared           | 0 |
| 1  | 71800138  | 72027550  | A | - | 510 | 12 | 0.02 | 260 | 219 | 0.46 | 340 | 177 | 0.34 | 2 | 2 | 2 | tier2 | shared           | 0 |
| 1  | 72797149  | 73024561  | G | T | 582 | 17 | 0.03 | 325 | 256 | 0.44 | 467 | 303 | 0.39 | 2 | 2 | 2 | tier2 | shared           | 1 |
| 1  | 74274350  | 74501762  | G | A | 384 | 15 | 0.04 | 151 | 145 | 0.49 | 244 | 206 | 0.46 | 2 | 2 | 2 | tier3 | shared           | 0 |
| 1  | 7458084   | 7535497   | C | T | 440 | 17 | 0.04 | 269 | 237 | 0.47 | 353 | 233 | 0.40 | 2 | 2 | 2 | tier3 | shared           | 2 |
| 1  | 76675710  | 76903122  | A | G | 609 | 8  | 0.01 | 281 | 265 | 0.49 | 430 | 236 | 0.35 | 2 | 2 | 2 | tier3 | shared           | 1 |
| 1  | 85893519  | 86120931  | C | T | 598 | 18 | 0.03 | 257 | 246 | 0.49 | 394 | 249 | 0.39 | 2 | 2 | 2 | tier3 | shared           | 0 |
| 1  | 92405867  | 92633279  | A | G | 260 | 1  | 0.00 | 357 | 1   | 0.00 | 374 | 117 | 0.24 | 2 | 2 | 2 | tier3 | relapse-specific | 0 |
| 1  | 92814472  | 93041884  | A | G | 187 | 0  | 0.00 | 185 | 0   | 0.00 | 191 | 54  | 0.22 | 2 | 2 | 2 | tier3 | relapse-specific | 0 |
| 1  | 96583536  | 96810948  | C | T | 325 | 1  | 0.00 | 302 | 0   | 0.00 | 412 | 85  | 0.17 | 2 | 2 | 2 | tier3 | relapse-specific | 0 |
| 10 | 106149282 | 106159292 | G | T | 607 | 25 | 0.04 | 366 | 288 | 0.44 | 451 | 328 | 0.42 | 2 | 2 | 2 | tier3 | shared           | 0 |
| 10 | 108206310 | 108216320 | G | C | 334 | 14 | 0.04 | 223 | 190 | 0.46 | 329 | 219 | 0.40 | 2 | 2 | 2 | tier3 | shared           | 1 |
| 10 | 109089653 | 109099663 | G | T | 493 | 10 | 0.02 | 256 | 198 | 0.44 | 404 | 272 | 0.40 | 2 | 2 | 2 | tier3 | shared           | 1 |
| 10 | 109474382 | 109484392 | C | T | 564 | 18 | 0.03 | 310 | 246 | 0.44 | 393 | 265 | 0.40 | 2 | 2 | 2 | tier3 | shared           | 1 |
| 10 | 111614680 | 111624690 | C | T | 516 | 21 | 0.04 | 294 | 238 | 0.45 | 404 | 255 | 0.39 | 2 | 2 | 2 | tier3 | shared           | 0 |
| 10 | 118521897 | 118531907 | C | A | 401 | 18 | 0.04 | 238 | 233 | 0.49 | 403 | 216 | 0.35 | 2 | 2 | 2 | tier3 | shared           | 0 |
| 10 | 123046446 | 123056456 | C | T | 495 | 15 | 0.03 | 293 | 255 | 0.47 | 421 | 251 | 0.37 | 2 | 2 | 2 | tier3 | shared           | 1 |
| 10 | 123240826 | 123250836 | C | A | 576 | 19 | 0.03 | 320 | 244 | 0.43 | 513 | 306 | 0.37 | 2 | 2 | 2 | tier3 | shared           | 0 |
| 10 | 130239575 | 130349585 | C | T | 346 | 11 | 0.03 | 228 | 219 | 0.49 | 275 | 192 | 0.41 | 2 | 2 | 2 | tier3 | shared           | 1 |
| 10 | 131811648 | 131921658 | A | T | 661 | 34 | 0.05 | 421 | 326 | 0.44 | 616 | 386 | 0.39 | 2 | 2 | 2 | tier3 | shared           | 0 |
| 10 | 132961953 | 133071963 | C | T | 312 | 6  | 0.02 | 261 | 151 | 0.37 | 274 | 179 | 0.40 | 2 | 2 | 2 | tier3 | shared           | 1 |
| 10 | 24796595  | 24756589  | G | C | 611 | 19 | 0.03 | 265 | 215 | 0.45 | 386 | 314 | 0.45 | 2 | 2 | 2 | tier3 | shared           | 2 |
| 10 | 2683387   | 2693387   | G | A | 558 | 0  | 0.00 | 513 | 1   | 0.00 | 540 | 179 | 0.25 | 2 | 2 | 2 | tier3 | relapse-specific | 1 |
| 10 | 34395147  | 34355141  | A | G | 516 | 22 | 0.04 | 291 | 252 | 0.46 | 385 | 241 | 0.38 | 2 | 2 | 2 | tier3 | shared           | 1 |
| 10 | 35097999  | 35057993  | G | A | 564 | 18 | 0.03 | 330 | 294 | 0.47 | 386 | 292 | 0.43 | 2 | 2 | 2 | tier3 | shared           | 1 |
| 10 | 44234877  | 44914871  | A | G | 499 | 9  | 0.02 | 325 | 230 | 0.41 | 339 | 249 | 0.42 | 2 | 2 | 2 | tier3 | shared           | 0 |
| 10 | 49751447  | 50081441  | G | A | 494 | 20 | 0.04 | 309 | 291 | 0.49 | 475 | 265 | 0.36 | 2 | 2 | 2 | tier3 | shared           | 0 |
| 10 | 52900815  | 53230809  | T | A | 304 | 5  | 0.02 | 159 | 129 | 0.45 | 350 | 220 | 0.39 | 2 | 2 | 2 | tier2 | shared           | 0 |
| 10 | 57900843  | 58230837  | G | A | 481 | 20 | 0.04 | 250 | 189 | 0.43 | 383 | 258 | 0.40 | 2 | 2 | 2 | tier3 | shared           | 1 |
| 10 | 58707998  | 59037992  | C | G | 169 | 3  | 0.02 | 162 | 143 | 0.47 | 309 | 186 | 0.38 | 2 | 2 | 2 | tier3 | shared           | 1 |
| 10 | 59813586  | 60143580  | A | C | 319 | 15 | 0.04 | 138 | 112 | 0.45 | 225 | 147 | 0.40 | 2 | 2 | 2 | tier3 | shared           | 1 |
| 10 | 59929878  | 60259872  | G | A | 622 | 17 | 0.03 | 403 | 239 | 0.37 | 439 | 267 | 0.38 | 2 | 2 | 2 | tier3 | shared           | 0 |
| 10 | 60797293  | 61127287  | G | A | 454 | 16 | 0.03 | 282 | 249 | 0.47 | 367 | 250 | 0.41 | 2 | 2 | 2 | tier2 | shared           | 0 |
| 10 | 6584079   | 6544073   | C | T | 747 | 0  | 0.00 | 678 | 1   | 0.00 | 650 | 184 | 0.22 | 2 | 2 | 2 | tier3 | relapse-specific | 0 |
| 10 | 66044462  | 66374456  | G | A | 353 | 9  | 0.02 | 120 | 86  | 0.42 | 249 | 119 | 0.32 | 2 | 2 | 2 | tier3 | shared           | 0 |

|    |           |           |   |       |     |    |      |     |     |      |     |     |      |   |   |   |       |                  |    |
|----|-----------|-----------|---|-------|-----|----|------|-----|-----|------|-----|-----|------|---|---|---|-------|------------------|----|
| 10 | 69405514  | 69735508  | T | C     | 559 | 21 | 0.04 | 287 | 280 | 0.49 | 413 | 239 | 0.37 | 2 | 2 | 2 | tier3 | shared           | 0  |
| 10 | 78632491  | 78962485  | G | C     | 647 | 17 | 0.03 | 338 | 278 | 0.45 | 483 | 299 | 0.38 | 2 | 2 | 2 | tier3 | shared           | 2  |
| 10 | 79386002  | 79715996  | G | A     | 448 | 13 | 0.03 | 275 | 216 | 0.44 | 378 | 215 | 0.36 | 2 | 2 | 2 | tier3 | shared           | 0  |
| 10 | 83023330  | 83033350  | C | T     | 525 | 26 | 0.05 | 235 | 205 | 0.47 | 459 | 266 | 0.37 | 2 | 2 | 2 | tier3 | shared           | 1  |
| 10 | 86788266  | 86798286  | T | A     | 428 | 0  | 0.00 | 474 | 2   | 0.00 | 424 | 146 | 0.26 | 2 | 2 | 2 | tier3 | relapse-specific | 1  |
| 10 | 89337464  | 89347484  | T | A     | 350 | 8  | 0.02 | 158 | 182 | 0.54 | 248 | 211 | 0.46 | 2 | 2 | 2 | tier3 | shared           | 0  |
| 10 | 95035843  | 95045853  | G | A     | 174 | 5  | 0.03 | 83  | 51  | 0.38 | 98  | 58  | 0.37 | 2 | 2 | 2 | tier3 | shared           | 0  |
| 11 | 100333298 | 100828088 | C | T     | 559 | 21 | 0.04 | 263 | 245 | 0.48 | 421 | 290 | 0.41 | 2 | 2 | 2 | tier3 | shared           | 0  |
| 11 | 10203546  | 10246970  | C | G     | 263 | 0  | 0.00 | 253 | 1   | 0.00 | 338 | 102 | 0.23 | 2 | 2 | 2 | tier3 | relapse-specific | 1  |
| 11 | 11557702  | 11601126  | G | A     | 434 | 11 | 0.02 | 250 | 195 | 0.44 | 349 | 214 | 0.38 | 2 | 2 | 2 | tier3 | shared           | 2  |
| 11 | 121559230 | 122054020 | A | C     | 330 | 10 | 0.03 | 142 | 160 | 0.53 | 268 | 166 | 0.38 | 2 | 2 | 2 | tier3 | shared           | 0  |
| 11 | 121572463 | 122067253 | G | A     | 560 | 9  | 0.02 | 321 | 260 | 0.45 | 428 | 258 | 0.38 | 2 | 2 | 2 | tier3 | shared           | 0  |
| 11 | 123267557 | 123762347 | C | T     | 505 | 11 | 0.02 | 227 | 146 | 0.39 | 357 | 214 | 0.37 | 2 | 2 | 2 | tier3 | shared           | 0  |
| 11 | 123747677 | 124242467 | G | A     | 611 | 22 | 0.03 | 369 | 323 | 0.47 | 515 | 326 | 0.39 | 2 | 2 | 2 | tier2 | shared           | 0  |
| 11 | 126858772 | 127353562 | A | G     | 420 | 18 | 0.04 | 213 | 169 | 0.44 | 321 | 218 | 0.40 | 2 | 2 | 2 | tier3 | shared           | 1  |
| 11 | 128690570 | 129185360 | G | A     | 437 | 14 | 0.03 | 222 | 185 | 0.45 | 324 | 243 | 0.43 | 2 | 2 | 2 | tier2 | shared           | 0  |
| 11 | 13312571  | 13355995  | C | T     | 593 | 22 | 0.04 | 301 | 326 | 0.52 | 437 | 326 | 0.43 | 2 | 2 | 2 | tier3 | shared           | 0  |
| 11 | 134002987 | 134497777 | C | T     | 440 | 15 | 0.03 | 238 | 159 | 0.40 | 318 | 189 | 0.37 | 2 | 2 | 2 | tier3 | shared           | 0  |
| 11 | 15314145  | 15357569  | G | A     | 476 | 22 | 0.04 | 221 | 204 | 0.48 | 370 | 214 | 0.37 | 2 | 2 | 2 | tier3 | shared           | 1  |
| 11 | 25549437  | 25592861  | T | C     | 303 | 12 | 0.04 | 150 | 116 | 0.44 | 259 | 182 | 0.41 | 2 | 2 | 2 | tier3 | shared           | 1  |
| 11 | 25964150  | 26007574  | C | A     | 562 | 14 | 0.02 | 346 | 247 | 0.42 | 473 | 285 | 0.38 | 2 | 2 | 2 | tier3 | shared           | 1  |
| 11 | 32374485  | 32417909  | - | GACCG | 430 | 10 | 0.02 | 267 | 178 | 0.40 | 301 | 142 | 0.32 | 2 | 2 | 2 | tier1 | shared           | 12 |
| 11 | 40201299  | 40244723  | C | T     | 424 | 9  | 0.02 | 230 | 214 | 0.48 | 361 | 236 | 0.40 | 2 | 2 | 2 | tier3 | shared           | 0  |
| 11 | 40438832  | 40482256  | A | C     | 412 | 0  | 0.00 | 398 | 0   | 0.00 | 423 | 139 | 0.25 | 2 | 2 | 2 | tier2 | relapse-specific | 1  |
| 11 | 41448094  | 41491518  | G | A     | 401 | 10 | 0.02 | 214 | 159 | 0.43 | 350 | 215 | 0.38 | 2 | 2 | 2 | tier3 | shared           | 1  |
| 11 | 49589473  | 49632897  | T | A     | 495 | 17 | 0.03 | 266 | 209 | 0.44 | 382 | 261 | 0.41 | 2 | 2 | 2 | tier3 | shared           | 0  |
| 11 | 50074658  | 50118082  | C | -     | 289 | 14 | 0.05 | 119 | 113 | 0.49 | 207 | 130 | 0.39 | 2 | 2 | 2 | tier3 | shared           | 1  |
| 11 | 55428174  | 55671598  | G | C     | 599 | 0  | 0.00 | 572 | 0   | 0.00 | 594 | 203 | 0.25 | 2 | 2 | 2 | tier3 | relapse-specific | 0  |
| 11 | 64909362  | 65152786  | T | C     | 482 | 25 | 0.05 | 289 | 319 | 0.52 | 344 | 243 | 0.41 | 2 | 2 | 2 | tier3 | shared           | 2  |
| 11 | 8041241   | 8084665   | G | A     | 261 | 6  | 0.02 | 164 | 94  | 0.36 | 200 | 116 | 0.37 | 2 | 2 | 2 | tier3 | shared           | 1  |
| 11 | 86377427  | 86699779  | C | T     | 577 | 18 | 0.03 | 265 | 231 | 0.47 | 450 | 287 | 0.39 | 2 | 2 | 2 | tier3 | shared           | 0  |
| 11 | 87891301  | 88251653  | A | C     | 278 | 0  | 0.00 | 307 | 0   | 0.00 | 364 | 99  | 0.21 | 2 | 2 | 2 | tier3 | relapse-specific | 1  |
| 11 | 88642511  | 89002863  | G | A     | 367 | 12 | 0.03 | 174 | 134 | 0.44 | 286 | 206 | 0.42 | 2 | 2 | 2 | tier3 | shared           | 0  |
| 11 | 93776183  | 94136535  | T | G     | 661 | 0  | 0.00 | 749 | 0   | 0.00 | 712 | 141 | 0.17 | 2 | 2 | 2 | tier3 | relapse-specific | 0  |
| 11 | 95802521  | 96162873  | A | G     | 353 | 10 | 0.03 | 141 | 116 | 0.45 | 283 | 181 | 0.39 | 2 | 2 | 2 | tier3 | shared           | 0  |
| 11 | 98849470  | 99344260  | G | T     | 315 | 8  | 0.02 | 139 | 88  | 0.39 | 242 | 149 | 0.38 | 2 | 2 | 2 | tier3 | shared           | 2  |
| 11 | 99822559  | 100317349 | C | -     | 680 | 20 | 0.03 | 406 | 334 | 0.45 | 486 | 312 | 0.39 | 2 | 2 | 2 | tier3 | shared           | 1  |
| 12 | 10136538  | 10245271  | A | G     | 505 | 16 | 0.03 | 259 | 249 | 0.49 | 469 | 298 | 0.39 | 2 | 2 | 2 | tier3 | shared           | 0  |
| 12 | 106007689 | 107483559 | A | G     | 489 | 10 | 0.02 | 261 | 219 | 0.46 | 455 | 300 | 0.40 | 2 | 2 | 2 | tier3 | shared           | 1  |
| 12 | 108956068 | 110471685 | G | A     | 569 | 12 | 0.02 | 278 | 280 | 0.50 | 453 | 283 | 0.38 | 2 | 2 | 2 | tier1 | shared           | 1  |

|    |           |           |                                 |                              |     |    |      |     |     |      |     |     |      |   |   |      |       |                  |    |
|----|-----------|-----------|---------------------------------|------------------------------|-----|----|------|-----|-----|------|-----|-----|------|---|---|------|-------|------------------|----|
| 12 | 110522431 | 112038048 | A                               | G                            | 574 | 1  | 0.00 | 544 | 0   | 0.00 | 556 | 127 | 0.19 | 2 | 2 | 2    | tier2 | relapse-specific | 0  |
| 12 | 117762123 | 119277740 | T                               | G                            | 478 | 19 | 0.04 | 228 | 144 | 0.39 | 348 | 210 | 0.38 | 2 | 2 | 2    | tier2 | shared           | 0  |
| 12 | 11962884  | 12071617  | C                               | T                            | 709 | 19 | 0.03 | 424 | 371 | 0.47 | 529 | 338 | 0.39 | 2 | 2 | 2    | tier3 | shared           | 5  |
| 12 | 125520708 | 126954755 | C                               | A                            | 672 | 22 | 0.03 | 273 | 365 | 0.57 | 368 | 384 | 0.51 | 2 | 2 | 2    | tier3 | shared           | 0  |
| 12 | 126711072 | 128145119 | C                               | T                            | 388 | 7  | 0.02 | 199 | 158 | 0.44 | 254 | 181 | 0.42 | 2 | 2 | 2    | tier3 | shared           | 0  |
| 12 | 127357651 | 128791698 | C                               | G                            | 383 | 11 | 0.03 | 217 | 136 | 0.39 | 286 | 193 | 0.40 | 2 | 2 | 2    | tier3 | shared           | 1  |
| 12 | 130098775 | 131532822 | G                               | T                            | 355 | 15 | 0.04 | 260 | 211 | 0.45 | 316 | 186 | 0.37 | 2 | 2 | 2    | tier3 | shared           | 0  |
| 12 | 131479347 | 132969274 | AGCCCAT AACCTG<br>TCACTCTCATCTC | -                            | 412 | 24 | 0.06 | 261 | 308 | 0.54 | 317 | 253 | 0.44 | 2 | 2 | 1.26 | tier2 | shared           | 1  |
| 12 | 22264699  | 22373432  | C                               | T                            | 628 | 16 | 0.02 | 321 | 276 | 0.46 | 528 | 339 | 0.39 | 2 | 2 | 2    | tier3 | shared           | 0  |
| 12 | 22700579  | 22809312  | T                               | A                            | 414 | 13 | 0.03 | 244 | 169 | 0.41 | 353 | 231 | 0.40 | 2 | 2 | 2    | tier3 | shared           | 0  |
| 12 | 31014363  | 31123096  | T                               | C                            | 542 | 16 | 0.03 | 320 | 260 | 0.45 | 393 | 256 | 0.39 | 2 | 2 | 2    | tier3 | shared           | 0  |
| 12 | 38297190  | 40010923  | C                               | G                            | 471 | 0  | 0.00 | 488 | 0   | 0.00 | 473 | 168 | 0.26 | 2 | 2 | 2    | tier1 | relapse-specific | 0  |
| 12 | 44240246  | 45953979  | T                               | G                            | 488 | 0  | 0.00 | 411 | 0   | 0.00 | 488 | 94  | 0.16 | 2 | 2 | 2    | tier3 | relapse-specific | 1  |
| 12 | 51724502  | 53438235  | C                               | -                            | 354 | 14 | 0.04 | 233 | 200 | 0.46 | 303 | 182 | 0.38 | 2 | 2 | 2    | tier2 | shared           | 1  |
| 12 | 52126095  | 53839828  | C                               | T                            | 174 | 13 | 0.07 | 95  | 95  | 0.50 | 136 | 107 | 0.44 | 2 | 2 | 2    | tier1 | shared           | 1  |
| 12 | 56811832  | 58525565  | G                               | A                            | 457 | 16 | 0.03 | 185 | 187 | 0.50 | 396 | 207 | 0.34 | 2 | 2 | 2    | tier2 | shared           | 1  |
| 12 | 60277805  | 61991538  | G                               | A                            | 667 | 20 | 0.03 | 375 | 304 | 0.45 | 486 | 302 | 0.38 | 2 | 2 | 2    | tier3 | shared           | 1  |
| 12 | 68965071  | 70678804  | G                               | A                            | 545 | 15 | 0.03 | 280 | 180 | 0.39 | 368 | 270 | 0.42 | 2 | 2 | 2    | tier3 | shared           | 0  |
| 12 | 70655871  | 72369604  | G                               | A                            | 633 | 12 | 0.02 | 391 | 305 | 0.44 | 463 | 330 | 0.42 | 2 | 2 | 2    | tier3 | shared           | 0  |
| 12 | 74609574  | 76323307  | A                               | G                            | 527 | 18 | 0.03 | 338 | 245 | 0.42 | 363 | 267 | 0.42 | 2 | 2 | 2    | tier3 | shared           | 0  |
| 12 | 79813281  | 81289150  | C                               | T                            | 553 | 0  | 0.00 | 466 | 0   | 0.00 | 555 | 108 | 0.16 | 2 | 2 | 2    | tier3 | relapse-specific | 0  |
| 12 | 85138336  | 86614205  | A                               | C                            | 467 | 17 | 0.04 | 220 | 215 | 0.49 | 326 | 194 | 0.37 | 2 | 2 | 2    | tier3 | shared           | 1  |
| 12 | 86295165  | 87771034  | G                               | T                            | 451 | 17 | 0.04 | 206 | 165 | 0.44 | 355 | 224 | 0.39 | 2 | 2 | 2    | tier3 | shared           | 1  |
| 13 | 107421802 | 108623801 | G                               | A                            | 531 | 19 | 0.03 | 319 | 221 | 0.41 | 427 | 254 | 0.37 | 2 | 2 | 2    | tier2 | shared           | 1  |
| 13 | 108417114 | 109619113 | C                               | A                            | 502 | 17 | 0.03 | 321 | 251 | 0.44 | 456 | 253 | 0.36 | 2 | 2 | 2    | tier3 | shared           | 1  |
| 13 | 111072379 | 112274378 | G                               | A                            | 506 | 14 | 0.03 | 302 | 272 | 0.47 | 365 | 214 | 0.37 | 2 | 2 | 2    | tier3 | shared           | 0  |
| 13 | 18209209  | 19311209  | G                               | A                            | 273 | 12 | 0.04 | 148 | 163 | 0.52 | 234 | 143 | 0.38 | 2 | 2 | 2    | tier3 | shared           | 0  |
| 13 | 27506256  | 28608256  | -                               | TCATATTCATATTCATATTCAT<br>AT | 449 | 4  | 0.01 | 288 | 106 | 0.27 | 310 | 103 | 0.25 | 2 | 2 | 2    | tier1 | shared           | 50 |
| 13 | 28152834  | 29254834  | G                               | A                            | 649 | 25 | 0.04 | 334 | 236 | 0.41 | 423 | 288 | 0.41 | 2 | 2 | 2    | tier2 | shared           | 0  |
| 13 | 29895438  | 30997438  | TACTC                           | -                            | 202 | 18 | 0.08 | 99  | 98  | 0.50 | 153 | 136 | 0.47 | 2 | 2 | 2    | tier3 | shared           | 0  |
| 13 | 34007876  | 35109876  | C                               | T                            | 409 | 16 | 0.04 | 202 | 158 | 0.44 | 304 | 165 | 0.35 | 2 | 2 | 2    | tier3 | shared           | 0  |
| 13 | 34100881  | 35202881  | T                               | -                            | 420 | 23 | 0.05 | 191 | 140 | 0.42 | 285 | 157 | 0.36 | 2 | 2 | 2    | tier3 | shared           | 1  |
| 13 | 54855092  | 55957091  | G                               | A                            | 171 | 4  | 0.02 | 56  | 46  | 0.45 | 127 | 91  | 0.42 | 2 | 2 | 2    | tier3 | shared           | 1  |
| 13 | 54857596  | 55959595  | C                               | A                            | 468 | 12 | 0.03 | 213 | 168 | 0.44 | 359 | 221 | 0.38 | 2 | 2 | 2    | tier3 | shared           | 1  |
| 13 | 54895439  | 55997438  | A                               | C                            | 466 | 16 | 0.03 | 214 | 199 | 0.48 | 358 | 217 | 0.38 | 2 | 2 | 2    | tier3 | shared           | 1  |
| 13 | 55417148  | 56519147  | C                               | A                            | 503 | 0  | 0.00 | 455 | 0   | 0.00 | 494 | 74  | 0.13 | 2 | 2 | 2    | tier3 | relapse-specific | 1  |
| 13 | 58677514  | 59779513  | A                               | T                            | 721 | 29 | 0.04 | 341 | 345 | 0.50 | 490 | 375 | 0.43 | 2 | 2 | 2    | tier3 | shared           | 1  |
| 13 | 63599514  | 64701513  | T                               | C                            | 531 | 3  | 0.01 | 473 | 40  | 0.08 | 670 | 46  | 0.06 | 2 | 2 | 2    | tier3 | shared           | 1  |
| 13 | 65790842  | 66892841  | C                               | T                            | 489 | 20 | 0.04 | 233 | 232 | 0.50 | 361 | 238 | 0.40 | 2 | 2 | 2    | tier3 | shared           | 0  |
| 13 | 65819875  | 66921874  | C                               | T                            | 592 | 12 | 0.02 | 334 | 318 | 0.49 | 413 | 285 | 0.41 | 2 | 2 | 2    | tier3 | shared           | 0  |

|    |           |           |      |   |     |    |      |     |     |      |     |     |      |   |   |   |       |                  |   |
|----|-----------|-----------|------|---|-----|----|------|-----|-----|------|-----|-----|------|---|---|---|-------|------------------|---|
| 13 | 68080775  | 69182774  | T    | C | 329 | 3  | 0.01 | 226 | 197 | 0.47 | 338 | 234 | 0.41 | 2 | 2 | 2 | tier3 | shared           | 0 |
| 13 | 70427767  | 71529766  | T    | C | 516 | 0  | 0.00 | 399 | 0   | 0.00 | 491 | 118 | 0.19 | 2 | 2 | 2 | tier3 | relapse-specific | 0 |
| 13 | 81090538  | 82192537  | C    | A | 430 | 0  | 0.00 | 359 | 0   | 0.00 | 483 | 85  | 0.15 | 2 | 2 | 2 | tier3 | relapse-specific | 1 |
| 13 | 83995315  | 85097314  | TAGG | - | 442 | 12 | 0.03 | 285 | 221 | 0.44 | 408 | 193 | 0.32 | 2 | 2 | 2 | tier2 | shared           | 0 |
| 13 | 84039979  | 85141978  | T    | G | 290 | 0  | 0.00 | 194 | 0   | 0.00 | 316 | 65  | 0.17 | 2 | 2 | 2 | tier3 | relapse-specific | 0 |
| 13 | 88627192  | 89829191  | C    | G | 158 | 4  | 0.02 | 117 | 62  | 0.35 | 168 | 101 | 0.38 | 2 | 2 | 2 | tier3 | shared           | 1 |
| 13 | 89964903  | 91166902  | C    | T | 588 | 16 | 0.03 | 366 | 236 | 0.39 | 450 | 313 | 0.41 | 2 | 2 | 2 | tier3 | shared           | 1 |
| 13 | 92632214  | 93834213  | C    | T | 379 | 12 | 0.03 | 230 | 136 | 0.37 | 320 | 168 | 0.34 | 2 | 2 | 2 | tier2 | shared           | 0 |
| 13 | 93513959  | 94715958  | C    | T | 560 | 18 | 0.03 | 317 | 247 | 0.44 | 440 | 307 | 0.41 | 2 | 2 | 2 | tier3 | shared           | 0 |
| 13 | 93555335  | 94757334  | G    | A | 235 | 8  | 0.03 | 142 | 101 | 0.42 | 194 | 126 | 0.39 | 2 | 2 | 2 | tier3 | shared           | 0 |
| 13 | 95096598  | 96298597  | G    | A | 556 | 5  | 0.01 | 331 | 190 | 0.36 | 417 | 230 | 0.36 | 2 | 2 | 2 | tier2 | shared           | 0 |
| 14 | 100761804 | 101692051 | G    | A | 151 | 15 | 0.09 | 97  | 174 | 0.64 | 132 | 194 | 0.60 | 2 | 2 | 2 | tier3 | shared           | 1 |
| 14 | 101028995 | 101959242 | G    | A | 193 | 9  | 0.04 | 111 | 91  | 0.45 | 124 | 68  | 0.35 | 2 | 2 | 2 | tier3 | shared           | 1 |
| 14 | 105542139 | 106471094 | A    | T | 297 | 0  | 0.00 | 319 | 0   | 0.00 | 326 | 95  | 0.23 | 2 | 2 | 2 | tier3 | relapse-specific | 1 |
| 14 | 29397936  | 30328185  | C    | T | 591 | 9  | 0.02 | 322 | 212 | 0.40 | 396 | 243 | 0.38 | 2 | 2 | 2 | tier3 | shared           | 1 |
| 14 | 31667574  | 32597823  | G    | A | 247 | 0  | 0.00 | 265 | 0   | 0.00 | 194 | 57  | 0.23 | 2 | 2 | 2 | tier3 | relapse-specific | 1 |
| 14 | 33154434  | 34084683  | T    | C | 533 | 0  | 0.00 | 400 | 0   | 0.00 | 423 | 112 | 0.21 | 2 | 2 | 2 | tier3 | relapse-specific | 0 |
| 14 | 48690637  | 49620887  | T    | C | 359 | 11 | 0.03 | 158 | 205 | 0.56 | 286 | 155 | 0.35 | 2 | 2 | 2 | tier3 | shared           | 1 |
| 14 | 52599500  | 53529750  | C    | T | 544 | 22 | 0.04 | 341 | 245 | 0.42 | 369 | 260 | 0.41 | 2 | 2 | 2 | tier1 | shared           | 1 |
| 14 | 56091064  | 57021311  | C    | T | 653 | 0  | 0.00 | 554 | 0   | 0.00 | 560 | 137 | 0.20 | 2 | 2 | 2 | tier3 | relapse-specific | 0 |
| 14 | 56274859  | 57205106  | C    | T | 560 | 28 | 0.05 | 368 | 288 | 0.44 | 498 | 292 | 0.37 | 2 | 2 | 2 | tier2 | shared           | 1 |
| 14 | 61937789  | 62868036  | A    | C | 526 | 13 | 0.02 | 235 | 229 | 0.49 | 405 | 289 | 0.42 | 2 | 2 | 2 | tier3 | shared           | 1 |
| 14 | 62593389  | 63523636  | C    | T | 691 | 22 | 0.03 | 318 | 291 | 0.48 | 487 | 313 | 0.39 | 2 | 2 | 2 | tier3 | shared           | 2 |
| 14 | 64969508  | 65899755  | C    | T | 104 | 3  | 0.03 | 52  | 48  | 0.48 | 106 | 62  | 0.37 | 2 | 2 | 2 | tier2 | shared           | 0 |
| 14 | 73015343  | 73945590  | T    | A | 404 | 10 | 0.02 | 222 | 168 | 0.43 | 304 | 203 | 0.40 | 2 | 2 | 2 | tier3 | shared           | 1 |
| 14 | 76162153  | 77092400  | C    | A | 505 | 18 | 0.03 | 294 | 232 | 0.44 | 358 | 252 | 0.41 | 2 | 2 | 2 | tier3 | shared           | 1 |
| 14 | 79736807  | 80667054  | T    | C | 326 | 11 | 0.03 | 137 | 122 | 0.47 | 242 | 142 | 0.37 | 2 | 2 | 2 | tier3 | shared           | 1 |
| 14 | 79918273  | 80848520  | C    | T | 571 | 18 | 0.03 | 372 | 292 | 0.44 | 430 | 265 | 0.38 | 2 | 2 | 2 | tier3 | shared           | 1 |
| 14 | 83367514  | 84297761  | T    | A | 674 | 18 | 0.03 | 335 | 242 | 0.42 | 426 | 310 | 0.42 | 2 | 2 | 2 | tier3 | shared           | 1 |
| 14 | 83809609  | 84739856  | G    | T | 432 | 24 | 0.05 | 250 | 207 | 0.45 | 352 | 207 | 0.37 | 2 | 2 | 2 | tier3 | shared           | 1 |
| 14 | 85694731  | 86624978  | G    | A | 181 | 7  | 0.04 | 102 | 80  | 0.44 | 221 | 113 | 0.34 | 2 | 2 | 2 | tier3 | shared           | 1 |
| 14 | 99386453  | 100316700 | G    | T | 563 | 17 | 0.03 | 321 | 259 | 0.45 | 417 | 275 | 0.40 | 2 | 2 | 2 | tier3 | shared           | 0 |
| 15 | 40851227  | 43063935  | C    | G | 646 | 0  | 0.00 | 546 | 1   | 0.00 | 553 | 188 | 0.25 | 2 | 2 | 2 | tier3 | relapse-specific | 1 |
| 15 | 48279128  | 50491836  | A    | G | 242 | 4  | 0.02 | 86  | 79  | 0.48 | 141 | 100 | 0.41 | 2 | 2 | 2 | tier3 | shared           | 1 |
| 15 | 49763040  | 51975748  | C    | T | 332 | 14 | 0.04 | 162 | 122 | 0.43 | 287 | 160 | 0.36 | 2 | 2 | 2 | tier3 | shared           | 0 |
| 15 | 56133363  | 58346071  | G    | A | 628 | 20 | 0.03 | 327 | 284 | 0.46 | 485 | 330 | 0.40 | 2 | 2 | 2 | tier2 | shared           | 0 |
| 15 | 65905590  | 68118536  | G    | T | 392 | 20 | 0.05 | 269 | 204 | 0.43 | 318 | 205 | 0.39 | 2 | 2 | 2 | tier1 | shared           | 1 |
| 15 | 68596723  | 70809669  | C    | T | 515 | 14 | 0.03 | 296 | 236 | 0.44 | 370 | 237 | 0.39 | 2 | 2 | 2 | tier3 | shared           | 1 |
| 15 | 72494038  | 74706985  | C    | T | 504 | 7  | 0.01 | 249 | 214 | 0.46 | 287 | 196 | 0.41 | 2 | 2 | 2 | tier1 | shared           | 1 |
| 15 | 76282691  | 78495636  | C    | T | 578 | 21 | 0.04 | 340 | 293 | 0.46 | 451 | 300 | 0.40 | 2 | 2 | 2 | tier3 | shared           | 0 |

|    |          |           |   |   |      |    |      |      |     |      |      |     |      |   |      |      |       |                  |   |
|----|----------|-----------|---|---|------|----|------|------|-----|------|------|-----|------|---|------|------|-------|------------------|---|
| 15 | 76344956 | 78557901  | - | T | 639  | 15 | 0.02 | 488  | 312 | 0.39 | 534  | 348 | 0.39 | 2 | 2    | 2    | tier3 | shared           | 0 |
| 15 | 78642023 | 80854968  | A | G | 518  | 14 | 0.03 | 296  | 190 | 0.39 | 418  | 268 | 0.39 | 2 | 2    | 2    | tier3 | shared           | 0 |
| 15 | 78892039 | 81104984  | C | T | 562  | 10 | 0.02 | 246  | 205 | 0.45 | 398  | 230 | 0.37 | 2 | 2    | 2    | tier2 | shared           | 1 |
| 15 | 79991574 | 82204519  | A | C | 534  | 0  | 0.00 | 570  | 0   | 0.00 | 553  | 101 | 0.15 | 2 | 2    | 2    | tier3 | relapse-specific | 1 |
| 15 | 91557562 | 93756558  | G | A | 447  | 13 | 0.03 | 296  | 182 | 0.38 | 330  | 217 | 0.40 | 2 | 2    | 2    | tier3 | shared           | 0 |
| 15 | 93993689 | 96192685  | C | T | 448  | 16 | 0.03 | 223  | 221 | 0.50 | 388  | 207 | 0.35 | 2 | 2    | 2    | tier3 | shared           | 1 |
| 15 | 96136581 | 98335577  | G | A | 461  | 0  | 0.00 | 372  | 32  | 0.08 | 500  | 38  | 0.07 | 2 | 2    | 2    | tier2 | shared           | 1 |
| 15 | 99983562 | 102166039 | C | T | 569  | 19 | 0.03 | 369  | 250 | 0.40 | 443  | 290 | 0.40 | 2 | 2    | 2    | tier3 | shared           | 0 |
| 16 | 19233525 | 19326024  | C | T | 683  | 21 | 0.03 | 360  | 338 | 0.48 | 439  | 317 | 0.42 | 2 | 2    | 2    | tier2 | shared           | 0 |
| 16 | 2117184  | 2177183   | G | A | 568  | 25 | 0.04 | 375  | 309 | 0.45 | 405  | 296 | 0.42 | 2 | 2    | 1.22 | tier2 | shared           | 0 |
| 16 | 53595367 | 55037866  | A | G | 538  | 17 | 0.03 | 306  | 241 | 0.44 | 442  | 274 | 0.38 | 2 | 2    | 2    | tier3 | shared           | 1 |
| 16 | 5741425  | 5801424   | C | T | 570  | 23 | 0.04 | 341  | 290 | 0.46 | 427  | 274 | 0.39 | 2 | 2    | 2    | tier3 | shared           | 0 |
| 16 | 58910650 | 60353149  | G | A | 643  | 20 | 0.03 | 386  | 208 | 0.35 | 366  | 248 | 0.40 | 2 | 2    | 2    | tier3 | shared           | 0 |
| 16 | 58951352 | 60393851  | C | T | 153  | 8  | 0.05 | 80   | 92  | 0.53 | 89   | 69  | 0.44 | 2 | 2    | 2    | tier3 | shared           | 0 |
| 16 | 60628092 | 62070591  | A | T | 278  | 8  | 0.03 | 216  | 159 | 0.42 | 212  | 153 | 0.42 | 2 | 2    | 2    | tier2 | shared           | 1 |
| 16 | 6649061  | 6709060   | G | A | 406  | 12 | 0.03 | 176  | 144 | 0.45 | 244  | 177 | 0.42 | 2 | 2    | 2    | tier3 | shared           | 0 |
| 16 | 6807899  | 6867898   | C | A | 614  | 21 | 0.03 | 323  | 281 | 0.47 | 463  | 300 | 0.39 | 2 | 2    | 2    | tier2 | shared           | 0 |
| 16 | 7213109  | 7273108   | T | A | 541  | 23 | 0.04 | 286  | 259 | 0.48 | 412  | 257 | 0.38 | 2 | 2    | 2    | tier3 | shared           | 0 |
| 16 | 76077228 | 77519727  | C | A | 453  | 8  | 0.02 | 218  | 200 | 0.48 | 380  | 237 | 0.38 | 2 | 2    | 2    | tier3 | shared           | 0 |
| 16 | 76107813 | 77550312  | G | T | 596  | 23 | 0.04 | 322  | 259 | 0.45 | 469  | 277 | 0.37 | 2 | 2    | 2    | tier3 | shared           | 1 |
| 16 | 76385589 | 77828088  | G | A | 576  | 16 | 0.03 | 276  | 227 | 0.45 | 390  | 283 | 0.42 | 2 | 2    | 2    | tier3 | shared           | 0 |
| 16 | 86629993 | 88072492  | T | C | 393  | 13 | 0.03 | 230  | 209 | 0.48 | 377  | 213 | 0.36 | 2 | 2    | 1.31 | tier3 | shared           | 0 |
| 17 | 13675592 | 13734867  | G | T | 480  | 8  | 0.02 | 179  | 172 | 0.49 | 329  | 190 | 0.37 | 2 | 2    | 2    | tier3 | shared           | 1 |
| 17 | 16358142 | 16417417  | A | G | 450  | 10 | 0.02 | 264  | 187 | 0.41 | 294  | 200 | 0.40 | 2 | 2    | 2    | tier3 | shared           | 0 |
| 17 | 17469948 | 17529223  | C | A | 443  | 14 | 0.03 | 290  | 251 | 0.46 | 411  | 264 | 0.39 | 2 | 2    | 2    | tier3 | shared           | 0 |
| 17 | 21255680 | 21315087  | A | T | 1188 | 12 | 0.01 | 1066 | 199 | 0.16 | 1238 | 182 | 0.13 | 2 | 3.89 | 2    | tier3 | shared           | 1 |
| 17 | 21466743 | 21526150  | T | C | 665  | 7  | 0.01 | 526  | 130 | 0.20 | 862  | 164 | 0.16 | 2 | 2    | 3.51 | tier3 | shared           | 0 |
| 17 | 23027134 | 26003007  | C | T | 165  | 8  | 0.05 | 82   | 60  | 0.42 | 116  | 64  | 0.36 | 2 | 2    | 2    | tier3 | shared           | 0 |
| 17 | 27401222 | 30377109  | - | T | 301  | 7  | 0.02 | 176  | 133 | 0.43 | 266  | 168 | 0.39 | 2 | 1.11 | 1.06 | tier1 | shared           | 1 |
| 17 | 36333913 | 39080387  | C | T | 569  | 18 | 0.03 | 297  | 281 | 0.49 | 427  | 244 | 0.36 | 2 | 2    | 2    | tier3 | shared           | 0 |
| 17 | 38835868 | 41480342  | C | T | 304  | 13 | 0.04 | 144  | 122 | 0.46 | 218  | 144 | 0.40 | 2 | 2    | 2    | tier3 | shared           | 0 |
| 17 | 39843379 | 42487853  | G | A | 581  | 0  | 0.00 | 489  | 0   | 0.00 | 532  | 154 | 0.22 | 2 | 2    | 2    | tier3 | relapse-specific | 1 |
| 17 | 40050083 | 42694557  | G | A | 586  | 22 | 0.04 | 359  | 306 | 0.46 | 408  | 271 | 0.40 | 2 | 2    | 2    | tier3 | shared           | 0 |
| 17 | 40442905 | 43087379  | G | A | 403  | 16 | 0.04 | 189  | 172 | 0.48 | 205  | 181 | 0.47 | 2 | 2    | 2    | tier3 | shared           | 0 |
| 17 | 45343100 | 47988101  | G | C | 327  | 0  | 0.00 | 329  | 0   | 0.00 | 289  | 66  | 0.19 | 2 | 2    | 2    | tier2 | relapse-specific | 1 |
| 17 | 48566688 | 51211689  | T | A | 390  | 7  | 0.02 | 173  | 162 | 0.48 | 352  | 169 | 0.32 | 2 | 2    | 2    | tier2 | shared           | 1 |
| 17 | 58253055 | 60899323  | C | T | 467  | 1  | 0.00 | 556  | 0   | 0.00 | 537  | 97  | 0.15 | 2 | 2    | 2    | tier3 | relapse-specific | 0 |
| 17 | 59595878 | 62242146  | G | A | 470  | 14 | 0.03 | 275  | 209 | 0.43 | 328  | 225 | 0.41 | 2 | 2    | 2    | tier3 | shared           | 0 |
| 17 | 66541218 | 69029623  | G | T | 759  | 25 | 0.03 | 350  | 321 | 0.48 | 516  | 351 | 0.40 | 2 | 2    | 2    | tier2 | shared           | 0 |
| 17 | 66623767 | 69112172  | G | T | 781  | 21 | 0.03 | 398  | 280 | 0.41 | 601  | 331 | 0.36 | 2 | 2    | 2    | tier3 | shared           | 1 |

|    |           |           |   |   |     |    |      |     |     |      |     |     |      |   |   |      |       |                  |   |
|----|-----------|-----------|---|---|-----|----|------|-----|-----|------|-----|-----|------|---|---|------|-------|------------------|---|
| 17 | 68908757  | 71397162  | G | T | 454 | 22 | 0.05 | 283 | 245 | 0.46 | 341 | 208 | 0.38 | 2 | 2 | 2    | tier1 | shared           | 1 |
| 17 | 69104075  | 71592480  | G | - | 359 | 7  | 0.02 | 234 | 179 | 0.43 | 262 | 159 | 0.38 | 2 | 2 | 2    | tier3 | shared           | 1 |
| 17 | 77816725  | 80223436  | T | G | 422 | 11 | 0.03 | 275 | 245 | 0.47 | 325 | 222 | 0.41 | 2 | 2 | 1.19 | tier3 | shared           | 0 |
| 17 | 8989445   | 9048720   | C | T | 443 | 28 | 0.06 | 254 | 184 | 0.42 | 374 | 211 | 0.36 | 2 | 2 | 2    | tier3 | shared           | 0 |
| 18 | 11401121  | 11411121  | T | C | 355 | 0  | 0.00 | 296 | 0   | 0.00 | 346 | 84  | 0.20 | 2 | 2 | 2    | tier3 | relapse-specific | 1 |
| 18 | 13357053  | 13367053  | G | A | 629 | 19 | 0.03 | 349 | 291 | 0.45 | 447 | 303 | 0.40 | 2 | 2 | 2    | tier3 | shared           | 1 |
| 18 | 24510358  | 26256360  | C | A | 624 | 25 | 0.04 | 357 | 285 | 0.44 | 465 | 272 | 0.37 | 2 | 2 | 2    | tier3 | shared           | 0 |
| 18 | 26790827  | 28536829  | A | G | 390 | 9  | 0.02 | 162 | 159 | 0.50 | 265 | 200 | 0.43 | 2 | 2 | 2    | tier3 | shared           | 0 |
| 18 | 26874395  | 28620397  | A | G | 601 | 19 | 0.03 | 311 | 246 | 0.44 | 466 | 258 | 0.36 | 2 | 2 | 2    | tier3 | shared           | 0 |
| 18 | 31407153  | 33153155  | C | T | 532 | 9  | 0.02 | 206 | 174 | 0.46 | 359 | 198 | 0.36 | 2 | 2 | 2    | tier3 | shared           | 0 |
| 18 | 35462584  | 37208586  | C | T | 533 | 16 | 0.03 | 295 | 219 | 0.43 | 399 | 221 | 0.36 | 2 | 2 | 2    | tier3 | shared           | 0 |
| 18 | 3663      | 13663     | C | T | 537 | 9  | 0.02 | 437 | 143 | 0.25 | 489 | 134 | 0.22 | 2 | 2 | 2    | tier3 | shared           | 0 |
| 18 | 38565791  | 40311793  | T | G | 371 | 13 | 0.03 | 181 | 141 | 0.44 | 324 | 202 | 0.38 | 2 | 2 | 2    | tier3 | shared           | 0 |
| 18 | 39337589  | 41083591  | C | A | 620 | 0  | 0.00 | 571 | 0   | 0.00 | 597 | 208 | 0.26 | 2 | 2 | 2    | tier2 | relapse-specific | 1 |
| 18 | 5053185   | 5063185   | G | A | 339 | 0  | 0.00 | 284 | 0   | 0.00 | 362 | 74  | 0.17 | 2 | 2 | 2    | tier3 | relapse-specific | 1 |
| 18 | 50651208  | 52500210  | A | G | 323 | 11 | 0.03 | 132 | 91  | 0.41 | 247 | 154 | 0.38 | 2 | 2 | 2    | tier3 | shared           | 0 |
| 18 | 56626116  | 58475136  | C | T | 389 | 7  | 0.02 | 215 | 146 | 0.40 | 317 | 196 | 0.38 | 2 | 2 | 2    | tier3 | shared           | 0 |
| 18 | 5938070   | 5948070   | A | C | 328 | 0  | 0.00 | 192 | 0   | 0.00 | 319 | 45  | 0.12 | 2 | 2 | 2    | tier3 | relapse-specific | 0 |
| 18 | 63593005  | 65442025  | C | T | 605 | 0  | 0.00 | 620 | 0   | 0.00 | 558 | 147 | 0.21 | 2 | 2 | 2    | tier3 | relapse-specific | 1 |
| 18 | 6741538   | 6751538   | T | - | 549 | 16 | 0.03 | 254 | 241 | 0.49 | 368 | 271 | 0.42 | 2 | 2 | 2    | tier3 | shared           | 0 |
| 18 | 69785377  | 71634397  | C | T | 518 | 18 | 0.03 | 287 | 228 | 0.44 | 412 | 266 | 0.39 | 2 | 2 | 2    | tier3 | shared           | 1 |
| 18 | 71180486  | 73051498  | G | A | 438 | 17 | 0.04 | 219 | 194 | 0.47 | 304 | 213 | 0.41 | 2 | 2 | 2    | tier3 | shared           | 0 |
| 18 | 7273835   | 7283835   | A | G | 295 | 15 | 0.05 | 192 | 176 | 0.48 | 269 | 172 | 0.39 | 2 | 2 | 2    | tier3 | shared           | 0 |
| 18 | 74251612  | 76150624  | G | A | 338 | 8  | 0.02 | 156 | 133 | 0.46 | 229 | 134 | 0.37 | 2 | 2 | 2    | tier2 | shared           | 1 |
| 19 | 1995081   | 2044081   | A | G | 344 | 17 | 0.05 | 291 | 293 | 0.50 | 340 | 264 | 0.44 | 2 | 2 | 1.27 | tier2 | shared           | 1 |
| 19 | 34247995  | 29556155  | C | A | 553 | 17 | 0.03 | 269 | 250 | 0.48 | 420 | 258 | 0.38 | 2 | 2 | 2    | tier3 | shared           | 1 |
| 19 | 35106340  | 30414500  | T | A | 626 | 22 | 0.03 | 355 | 319 | 0.47 | 501 | 336 | 0.40 | 2 | 2 | 2    | tier3 | shared           | 0 |
| 19 | 43341487  | 38649647  | T | C | 460 | 0  | 0.00 | 468 | 0   | 0.00 | 427 | 143 | 0.25 | 2 | 2 | 2    | tier3 | relapse-specific | 1 |
| 19 | 43895312  | 39203472  | T | G | 418 | 17 | 0.04 | 242 | 189 | 0.44 | 326 | 199 | 0.38 | 2 | 2 | 2    | tier3 | shared           | 0 |
| 19 | 56767177  | 52075365  | G | A | 520 | 10 | 0.02 | 262 | 224 | 0.46 | 381 | 265 | 0.41 | 2 | 2 | 2    | tier3 | shared           | 0 |
| 19 | 5893322   | 5942322   | G | A | 584 | 0  | 0.00 | 538 | 0   | 0.00 | 446 | 159 | 0.26 | 2 | 2 | 2    | tier2 | relapse-specific | 0 |
| 19 | 6928811   | 6977811   | C | T | 557 | 25 | 0.04 | 351 | 257 | 0.42 | 475 | 257 | 0.35 | 2 | 2 | 2    | tier3 | shared           | 0 |
| 19 | 7817120   | 7911120   | C | T | 449 | 10 | 0.02 | 251 | 253 | 0.50 | 351 | 236 | 0.40 | 2 | 2 | 1.3  | tier3 | shared           | 0 |
| 2  | 107911554 | 108545122 | G | A | 615 | 19 | 0.03 | 299 | 223 | 0.43 | 422 | 281 | 0.40 | 2 | 2 | 2    | tier3 | shared           | 0 |
| 2  | 113100668 | 113384197 | G | A | 434 | 12 | 0.03 | 290 | 218 | 0.43 | 371 | 242 | 0.39 | 2 | 2 | 2    | tier2 | shared           | 0 |
| 2  | 117989368 | 118272898 | C | T | 468 | 13 | 0.03 | 195 | 138 | 0.41 | 337 | 224 | 0.40 | 2 | 2 | 2    | tier3 | shared           | 1 |
| 2  | 126135788 | 126419318 | G | A | 345 | 0  | 0.00 | 390 | 0   | 0.00 | 332 | 120 | 0.27 | 2 | 2 | 2    | tier3 | relapse-specific | 1 |
| 2  | 126632556 | 126916086 | C | T | 717 | 25 | 0.03 | 442 | 364 | 0.45 | 544 | 399 | 0.42 | 2 | 2 | 2    | tier2 | shared           | 1 |
| 2  | 12925647  | 13008196  | C | T | 453 | 18 | 0.04 | 214 | 175 | 0.45 | 334 | 187 | 0.36 | 2 | 2 | 2    | tier3 | shared           | 1 |
| 2  | 13004617  | 13087166  | C | T | 578 | 18 | 0.03 | 335 | 310 | 0.48 | 478 | 329 | 0.41 | 2 | 2 | 2    | tier3 | shared           | 1 |

|   |           |           |   |   |     |    |      |     |     |      |     |     |      |   |   |   |       |                  |   |
|---|-----------|-----------|---|---|-----|----|------|-----|-----|------|-----|-----|------|---|---|---|-------|------------------|---|
| 2 | 134194471 | 134478001 | G | A | 739 | 23 | 0.03 | 510 | 367 | 0.42 | 569 | 329 | 0.37 | 2 | 2 | 2 | tier3 | shared           | 1 |
| 2 | 134728095 | 135011625 | A | G | 511 | 12 | 0.02 | 294 | 268 | 0.48 | 376 | 246 | 0.40 | 2 | 2 | 2 | tier2 | shared           | 0 |
| 2 | 138533941 | 138817471 | C | A | 328 | 9  | 0.03 | 134 | 106 | 0.44 | 262 | 165 | 0.39 | 2 | 2 | 2 | tier3 | shared           | 0 |
| 2 | 142698138 | 142981668 | G | A | 453 | 13 | 0.03 | 200 | 189 | 0.49 | 373 | 235 | 0.39 | 2 | 2 | 2 | tier3 | shared           | 1 |
| 2 | 145358586 | 145642116 | T | C | 344 | 10 | 0.03 | 228 | 185 | 0.45 | 316 | 180 | 0.36 | 2 | 2 | 2 | tier3 | shared           | 1 |
| 2 | 149244556 | 149528086 | A | G | 368 | 14 | 0.04 | 188 | 170 | 0.47 | 295 | 210 | 0.42 | 2 | 2 | 2 | tier3 | shared           | 0 |
| 2 | 151741023 | 152032777 | A | G | 645 | 18 | 0.03 | 407 | 333 | 0.45 | 489 | 320 | 0.40 | 2 | 2 | 2 | tier3 | shared           | 0 |
| 2 | 155526504 | 155818258 | G | A | 523 | 11 | 0.02 | 265 | 199 | 0.43 | 330 | 235 | 0.42 | 2 | 2 | 2 | tier2 | shared           | 0 |
| 2 | 162056438 | 162348192 | C | A | 443 | 13 | 0.03 | 173 | 156 | 0.47 | 262 | 197 | 0.43 | 2 | 2 | 2 | tier2 | shared           | 0 |
| 2 | 162376985 | 162668739 | G | A | 432 | 12 | 0.03 | 247 | 191 | 0.44 | 358 | 249 | 0.41 | 2 | 2 | 2 | tier3 | shared           | 1 |
| 2 | 163839660 | 164131414 | G | A | 557 | 24 | 0.04 | 347 | 316 | 0.48 | 471 | 303 | 0.39 | 2 | 2 | 2 | tier3 | shared           | 0 |
| 2 | 167238182 | 167529936 | G | T | 526 | 0  | 0.00 | 481 | 0   | 0.00 | 542 | 112 | 0.17 | 2 | 2 | 2 | tier3 | relapse-specific | 1 |
| 2 | 170553191 | 170844945 | G | C | 584 | 17 | 0.03 | 266 | 232 | 0.47 | 423 | 269 | 0.39 | 2 | 2 | 2 | tier3 | shared           | 2 |
| 2 | 170590308 | 170882062 | G | A | 680 | 29 | 0.04 | 315 | 218 | 0.41 | 491 | 332 | 0.40 | 2 | 2 | 2 | tier2 | shared           | 2 |
| 2 | 170601120 | 170892874 | G | A | 493 | 12 | 0.02 | 312 | 228 | 0.42 | 404 | 327 | 0.45 | 2 | 2 | 2 | tier3 | shared           | 2 |
| 2 | 172352355 | 172644109 | G | A | 649 | 0  | 0.00 | 556 | 0   | 0.00 | 621 | 191 | 0.24 | 2 | 2 | 2 | tier1 | relapse-specific | 0 |
| 2 | 173346781 | 173638535 | T | C | 413 | 0  | 0.00 | 323 | 0   | 0.00 | 334 | 83  | 0.20 | 2 | 2 | 2 | tier3 | relapse-specific | 0 |
| 2 | 174223167 | 174514921 | C | T | 303 | 9  | 0.03 | 148 | 131 | 0.47 | 217 | 141 | 0.39 | 2 | 2 | 2 | tier3 | shared           | 1 |
| 2 | 174599527 | 174891281 | G | A | 430 | 13 | 0.03 | 304 | 249 | 0.45 | 321 | 200 | 0.38 | 2 | 2 | 2 | tier2 | shared           | 0 |
| 2 | 175187625 | 175479379 | T | A | 590 | 28 | 0.05 | 333 | 269 | 0.45 | 517 | 350 | 0.40 | 2 | 2 | 2 | tier3 | shared           | 1 |
| 2 | 175972420 | 176264174 | G | T | 583 | 18 | 0.03 | 255 | 238 | 0.48 | 403 | 295 | 0.42 | 2 | 2 | 2 | tier3 | shared           | 1 |
| 2 | 177107365 | 177399119 | A | G | 545 | 21 | 0.04 | 275 | 251 | 0.48 | 398 | 311 | 0.44 | 2 | 2 | 2 | tier3 | shared           | 1 |
| 2 | 184179988 | 184471743 | C | T | 583 | 1  | 0.00 | 521 | 1   | 0.00 | 510 | 174 | 0.25 | 2 | 2 | 2 | tier3 | relapse-specific | 0 |
| 2 | 185694329 | 185986084 | G | T | 480 | 14 | 0.03 | 265 | 187 | 0.41 | 349 | 244 | 0.41 | 2 | 2 | 2 | tier3 | shared           | 1 |
| 2 | 18769914  | 18906433  | T | G | 359 | 0  | 0.00 | 281 | 0   | 0.00 | 317 | 78  | 0.20 | 2 | 2 | 2 | tier3 | relapse-specific | 1 |
| 2 | 198812651 | 199104406 | G | A | 390 | 17 | 0.04 | 280 | 254 | 0.48 | 436 | 291 | 0.40 | 2 | 2 | 2 | tier3 | shared           | 1 |
| 2 | 199366589 | 199658344 | T | C | 539 | 13 | 0.02 | 264 | 228 | 0.46 | 422 | 271 | 0.39 | 2 | 2 | 2 | tier3 | shared           | 1 |
| 2 | 204063074 | 204354829 | A | C | 767 | 39 | 0.05 | 399 | 384 | 0.49 | 528 | 355 | 0.40 | 2 | 2 | 2 | tier2 | shared           | 2 |
| 2 | 209806414 | 210098169 | A | - | 611 | 23 | 0.04 | 350 | 262 | 0.43 | 483 | 285 | 0.37 | 2 | 2 | 2 | tier3 | shared           | 1 |
| 2 | 211346371 | 211638126 | C | G | 330 | 0  | 0.00 | 445 | 1   | 0.00 | 471 | 143 | 0.23 | 2 | 2 | 2 | tier3 | relapse-specific | 1 |
| 2 | 211606619 | 211898374 | A | T | 553 | 18 | 0.03 | 266 | 270 | 0.50 | 392 | 245 | 0.38 | 2 | 2 | 2 | tier3 | shared           | 1 |
| 2 | 211950370 | 212242125 | C | T | 496 | 16 | 0.03 | 245 | 204 | 0.45 | 399 | 239 | 0.37 | 2 | 2 | 2 | tier2 | shared           | 0 |
| 2 | 215906054 | 216197809 | A | C | 601 | 0  | 0.00 | 553 | 0   | 0.00 | 597 | 159 | 0.21 | 2 | 2 | 2 | tier3 | relapse-specific | 0 |
| 2 | 22189743  | 22336238  | T | C | 224 | 11 | 0.05 | 116 | 89  | 0.43 | 223 | 155 | 0.41 | 2 | 2 | 2 | tier3 | shared           | 1 |
| 2 | 222379753 | 222671509 | T | C | 478 | 10 | 0.02 | 309 | 234 | 0.43 | 399 | 220 | 0.36 | 2 | 2 | 2 | tier3 | shared           | 1 |
| 2 | 223355668 | 223647424 | G | A | 505 | 16 | 0.03 | 265 | 189 | 0.42 | 368 | 253 | 0.41 | 2 | 2 | 2 | tier3 | shared           | 1 |
| 2 | 22359545  | 22506040  | C | T | 492 | 1  | 0.00 | 499 | 1   | 0.00 | 421 | 152 | 0.27 | 2 | 2 | 2 | tier3 | relapse-specific | 0 |
| 2 | 226124657 | 226416413 | C | T | 510 | 17 | 0.03 | 251 | 232 | 0.48 | 342 | 262 | 0.43 | 2 | 2 | 2 | tier3 | shared           | 0 |
| 2 | 228709267 | 229001023 | G | A | 597 | 20 | 0.03 | 265 | 200 | 0.43 | 404 | 296 | 0.42 | 2 | 2 | 2 | tier2 | shared           | 1 |
| 2 | 232588697 | 232880453 | G | A | 615 | 21 | 0.03 | 337 | 240 | 0.42 | 559 | 286 | 0.34 | 2 | 2 | 2 | tier3 | shared           | 0 |

|    |           |           |   |   |     |    |      |     |     |      |     |     |      |   |   |      |       |                  |   |
|----|-----------|-----------|---|---|-----|----|------|-----|-----|------|-----|-----|------|---|---|------|-------|------------------|---|
| 2  | 236412740 | 236748001 | G | A | 372 | 13 | 0.03 | 227 | 177 | 0.44 | 284 | 174 | 0.38 | 2 | 2 | 2    | tier3 | shared           | 0 |
| 2  | 23779620  | 23926116  | T | G | 316 | 10 | 0.03 | 204 | 184 | 0.47 | 209 | 145 | 0.41 | 2 | 2 | 2    | tier1 | shared           | 0 |
| 2  | 240719398 | 241070725 | A | C | 473 | 0  | 0.00 | 444 | 0   | 0.00 | 349 | 130 | 0.27 | 2 | 2 | 2    | tier3 | relapse-specific | 2 |
| 2  | 240798329 | 241149656 | G | T | 304 | 13 | 0.04 | 190 | 158 | 0.45 | 234 | 162 | 0.41 | 2 | 2 | 2    | tier3 | shared           | 1 |
| 2  | 26780566  | 26927062  | C | A | 332 | 8  | 0.02 | 218 | 167 | 0.43 | 247 | 193 | 0.44 | 2 | 2 | 2    | tier3 | shared           | 0 |
| 2  | 32055198  | 32201694  | T | G | 399 | 11 | 0.03 | 180 | 162 | 0.47 | 296 | 228 | 0.44 | 2 | 2 | 2    | tier3 | shared           | 0 |
| 2  | 33469395  | 33615891  | G | A | 413 | 18 | 0.04 | 282 | 222 | 0.44 | 369 | 218 | 0.37 | 2 | 2 | 2    | tier3 | shared           | 0 |
| 2  | 36083297  | 36229793  | G | A | 453 | 12 | 0.03 | 195 | 133 | 0.41 | 273 | 194 | 0.42 | 2 | 2 | 2    | tier2 | shared           | 1 |
| 2  | 36547137  | 36693633  | C | T | 617 | 13 | 0.02 | 387 | 273 | 0.41 | 485 | 310 | 0.39 | 2 | 2 | 2    | tier3 | shared           | 0 |
| 2  | 40229236  | 40375732  | - | T | 492 | 25 | 0.05 | 247 | 205 | 0.45 | 336 | 212 | 0.39 | 2 | 2 | 2    | tier3 | shared           | 0 |
| 2  | 40590204  | 40736700  | C | T | 437 | 11 | 0.02 | 304 | 211 | 0.41 | 345 | 246 | 0.42 | 2 | 2 | 2    | tier3 | shared           | 0 |
| 2  | 50857536  | 51004032  | T | G | 586 | 0  | 0.00 | 660 | 0   | 0.00 | 600 | 232 | 0.28 | 2 | 2 | 2    | tier3 | relapse-specific | 1 |
| 2  | 56255977  | 56402473  | T | C | 645 | 22 | 0.03 | 402 | 297 | 0.42 | 545 | 305 | 0.36 | 2 | 2 | 2    | tier2 | shared           | 0 |
| 2  | 57822803  | 57969299  | T | G | 317 | 9  | 0.03 | 130 | 117 | 0.47 | 259 | 142 | 0.35 | 2 | 2 | 2    | tier3 | shared           | 1 |
| 2  | 66491986  | 66638482  | A | C | 186 | 0  | 0.00 | 122 | 0   | 0.00 | 186 | 45  | 0.19 | 2 | 2 | 2    | tier3 | relapse-specific | 0 |
| 2  | 67016596  | 67163092  | G | A | 615 | 16 | 0.03 | 341 | 281 | 0.45 | 456 | 288 | 0.39 | 2 | 2 | 2    | tier3 | shared           | 1 |
| 2  | 77397977  | 77544469  | T | G | 329 | 6  | 0.02 | 125 | 121 | 0.49 | 229 | 171 | 0.43 | 2 | 2 | 2    | tier3 | shared           | 0 |
| 2  | 7955772   | 8038321   | T | A | 507 | 17 | 0.03 | 269 | 210 | 0.44 | 406 | 279 | 0.41 | 2 | 2 | 2    | tier3 | shared           | 0 |
| 2  | 83614631  | 83761120  | G | C | 585 | 0  | 0.00 | 544 | 0   | 0.00 | 442 | 169 | 0.28 | 2 | 2 | 2    | tier3 | relapse-specific | 1 |
| 2  | 84115889  | 84262378  | T | G | 468 | 0  | 0.00 | 363 | 0   | 0.00 | 451 | 138 | 0.23 | 2 | 2 | 2    | tier2 | relapse-specific | 1 |
| 2  | 96528883  | 97165156  | A | G | 265 | 6  | 0.02 | 207 | 165 | 0.44 | 199 | 135 | 0.40 | 2 | 2 | 2    | tier3 | shared           | 0 |
| 20 | 10715758  | 10767758  | A | G | 493 | 14 | 0.03 | 261 | 233 | 0.47 | 355 | 249 | 0.41 | 2 | 2 | 2    | tier3 | shared           | 1 |
| 20 | 11865626  | 11917626  | G | C | 357 | 7  | 0.02 | 160 | 148 | 0.48 | 282 | 177 | 0.39 | 2 | 2 | 2    | tier3 | shared           | 0 |
| 20 | 13210300  | 13262300  | A | T | 575 | 0  | 0.00 | 474 | 0   | 0.00 | 470 | 101 | 0.18 | 2 | 2 | 2    | tier3 | relapse-specific | 0 |
| 20 | 14794162  | 14846162  | C | T | 380 | 18 | 0.05 | 224 | 180 | 0.45 | 290 | 184 | 0.39 | 2 | 2 | 2    | tier3 | shared           | 0 |
| 20 | 14840849  | 14892849  | C | T | 523 | 17 | 0.03 | 309 | 262 | 0.46 | 363 | 232 | 0.39 | 2 | 2 | 2    | tier3 | shared           | 0 |
| 20 | 20346418  | 20398418  | T | G | 554 | 17 | 0.03 | 294 | 242 | 0.45 | 396 | 281 | 0.42 | 2 | 2 | 2    | tier3 | shared           | 1 |
| 20 | 38705572  | 39272158  | G | A | 507 | 17 | 0.03 | 247 | 206 | 0.45 | 322 | 216 | 0.40 | 2 | 2 | 2    | tier3 | shared           | 0 |
| 20 | 40233548  | 40800134  | C | T | 444 | 7  | 0.02 | 227 | 206 | 0.48 | 336 | 229 | 0.41 | 2 | 2 | 2    | tier3 | shared           | 3 |
| 20 | 42302696  | 42869282  | A | T | 559 | 13 | 0.02 | 325 | 273 | 0.46 | 488 | 301 | 0.38 | 2 | 2 | 2    | tier3 | shared           | 0 |
| 20 | 4681021   | 4733021   | A | G | 342 | 10 | 0.03 | 219 | 171 | 0.44 | 288 | 185 | 0.39 | 2 | 2 | 2    | tier3 | shared           | 0 |
| 20 | 50407501  | 50974094  | G | A | 623 | 21 | 0.03 | 354 | 282 | 0.44 | 448 | 324 | 0.42 | 2 | 2 | 2    | tier3 | shared           | 1 |
| 20 | 51030183  | 51596776  | C | T | 603 | 20 | 0.03 | 278 | 218 | 0.44 | 374 | 250 | 0.40 | 2 | 2 | 2    | tier3 | shared           | 0 |
| 20 | 53745770  | 54312363  | G | T | 248 | 3  | 0.01 | 148 | 69  | 0.32 | 230 | 139 | 0.38 | 2 | 2 | 2    | tier3 | shared           | 1 |
| 20 | 54963861  | 55530454  | G | A | 395 | 19 | 0.05 | 226 | 213 | 0.49 | 290 | 235 | 0.45 | 2 | 2 | 2    | tier2 | shared           | 1 |
| 20 | 60230226  | 60796831  | C | A | 294 | 14 | 0.05 | 221 | 212 | 0.49 | 240 | 183 | 0.43 | 2 | 2 | 2    | tier3 | shared           | 0 |
| 20 | 61644839  | 62174395  | T | C | 319 | 0  | 0.00 | 320 | 0   | 0.00 | 264 | 61  | 0.19 | 2 | 2 | 1.35 | tier3 | relapse-specific | 0 |
| 20 | 8347993   | 8399993   | G | T | 455 | 12 | 0.03 | 213 | 212 | 0.50 | 331 | 204 | 0.38 | 2 | 2 | 2    | tier3 | shared           | 0 |
| 21 | 18186691  | 19264820  | C | G | 515 | 15 | 0.03 | 230 | 173 | 0.43 | 416 | 220 | 0.35 | 2 | 2 | 2    | tier3 | shared           | 0 |
| 21 | 22404855  | 23482984  | A | T | 486 | 12 | 0.02 | 269 | 220 | 0.45 | 332 | 198 | 0.37 | 2 | 2 | 2    | tier3 | shared           | 0 |



|    |           |           |   |   |     |    |      |     |     |      |     |     |      |   |   |   |       |                  |    |
|----|-----------|-----------|---|---|-----|----|------|-----|-----|------|-----|-----|------|---|---|---|-------|------------------|----|
| 21 | 24117145  | 25195274  | T | C | 504 | 11 | 0.02 | 263 | 189 | 0.42 | 358 | 244 | 0.41 | 2 | 2 | 2 | tier3 | shared           | 1  |
| 21 | 25100372  | 26178501  | C | T | 604 | 10 | 0.02 | 332 | 206 | 0.38 | 435 | 256 | 0.37 | 2 | 2 | 2 | tier3 | shared           | 1  |
| 21 | 34742474  | 35820604  | C | T | 408 | 18 | 0.04 | 214 | 207 | 0.49 | 259 | 185 | 0.42 | 2 | 2 | 2 | tier2 | shared           | 0  |
| 21 | 35242561  | 36320691  | G | T | 541 | 14 | 0.03 | 279 | 242 | 0.46 | 379 | 235 | 0.38 | 2 | 2 | 2 | tier3 | shared           | 16 |
| 21 | 42042422  | 43169353  | C | T | 662 | 0  | 0.00 | 699 | 0   | 0.00 | 627 | 214 | 0.25 | 2 | 2 | 2 | tier1 | relapse-specific | 0  |
| 22 | 26191695  | 27861695  | G | T | 569 | 21 | 0.04 | 348 | 345 | 0.50 | 460 | 294 | 0.39 | 2 | 2 | 2 | tier3 | shared           | 1  |
| 22 | 30694329  | 32364329  | C | T | 360 | 9  | 0.02 | 212 | 148 | 0.41 | 263 | 163 | 0.38 | 2 | 2 | 2 | tier2 | shared           | 0  |
| 22 | 40878648  | 42548704  | G | A | 222 | 5  | 0.02 | 157 | 107 | 0.41 | 193 | 93  | 0.33 | 2 | 2 | 2 | tier2 | shared           | 0  |
| 22 | 43816898  | 45438234  | T | C | 412 | 5  | 0.01 | 227 | 177 | 0.44 | 309 | 194 | 0.39 | 2 | 2 | 2 | tier3 | shared           | 0  |
| 22 | 44307388  | 45928724  | C | T | 401 | 6  | 0.01 | 311 | 176 | 0.36 | 252 | 202 | 0.44 | 2 | 2 | 2 | tier3 | shared           | 0  |
| 22 | 46399434  | 48020770  | C | T | 453 | 15 | 0.03 | 253 | 230 | 0.48 | 331 | 211 | 0.39 | 2 | 2 | 2 | tier3 | shared           | 0  |
| 22 | 47687788  | 49301784  | G | T | 468 | 0  | 0.00 | 510 | 0   | 0.00 | 511 | 93  | 0.15 | 2 | 2 | 2 | tier3 | relapse-specific | 0  |
| 22 | 47922920  | 49536916  | G | A | 343 | 5  | 0.01 | 228 | 145 | 0.39 | 258 | 152 | 0.37 | 2 | 2 | 2 | tier3 | shared           | 1  |
| 22 | 48085867  | 49699863  | G | A | 462 | 14 | 0.03 | 303 | 234 | 0.44 | 319 | 227 | 0.42 | 2 | 2 | 2 | tier3 | shared           | 1  |
| 3  | 100708493 | 99225803  | G | A | 451 | 22 | 0.05 | 197 | 172 | 0.47 | 326 | 220 | 0.40 | 2 | 2 | 2 | tier3 | shared           | 1  |
| 3  | 10613530  | 10638530  | G | A | 574 | 24 | 0.04 | 261 | 245 | 0.48 | 424 | 259 | 0.38 | 2 | 2 | 2 | tier3 | shared           | 2  |
| 3  | 114482133 | 112999443 | C | T | 737 | 18 | 0.02 | 454 | 347 | 0.43 | 593 | 355 | 0.37 | 2 | 2 | 2 | tier1 | shared           | 1  |
| 3  | 117330222 | 115847532 | T | A | 552 | 15 | 0.03 | 285 | 209 | 0.42 | 393 | 253 | 0.39 | 2 | 2 | 2 | tier3 | shared           | 0  |
| 3  | 119077681 | 117594991 | T | C | 546 | 21 | 0.04 | 278 | 263 | 0.49 | 455 | 333 | 0.42 | 2 | 2 | 2 | tier3 | shared           | 1  |
| 3  | 119409962 | 117927272 | C | A | 401 | 18 | 0.04 | 171 | 159 | 0.48 | 379 | 220 | 0.37 | 2 | 2 | 2 | tier2 | shared           | 1  |
| 3  | 119584064 | 118101374 | C | T | 576 | 16 | 0.03 | 296 | 214 | 0.42 | 440 | 247 | 0.36 | 2 | 2 | 2 | tier3 | shared           | 1  |
| 3  | 1214870   | 1239870   | A | T | 368 | 15 | 0.04 | 183 | 152 | 0.45 | 262 | 166 | 0.39 | 2 | 2 | 2 | tier3 | shared           | 1  |
| 3  | 12173873  | 12198873  | G | A | 412 | 20 | 0.05 | 221 | 221 | 0.50 | 285 | 213 | 0.43 | 2 | 2 | 2 | tier3 | shared           | 0  |
| 3  | 123211720 | 121729030 | G | C | 375 | 14 | 0.04 | 160 | 159 | 0.50 | 235 | 192 | 0.45 | 2 | 2 | 2 | tier3 | shared           | 3  |
| 3  | 127618916 | 126136226 | G | T | 695 | 20 | 0.03 | 329 | 289 | 0.47 | 448 | 286 | 0.39 | 2 | 2 | 2 | tier3 | shared           | 2  |
| 3  | 129545959 | 128063269 | C | T | 399 | 8  | 0.02 | 181 | 123 | 0.40 | 279 | 179 | 0.39 | 2 | 2 | 2 | tier3 | shared           | 0  |
| 3  | 135434803 | 133952113 | T | - | 438 | 14 | 0.03 | 243 | 195 | 0.45 | 301 | 212 | 0.41 | 2 | 2 | 2 | tier3 | shared           | 0  |
| 3  | 139135471 | 137652781 | G | T | 542 | 0  | 0.00 | 576 | 0   | 0.00 | 571 | 137 | 0.19 | 2 | 2 | 2 | tier3 | relapse-specific | 1  |
| 3  | 148790700 | 147308010 | G | C | 594 | 10 | 0.02 | 266 | 208 | 0.44 | 430 | 233 | 0.35 | 2 | 2 | 2 | tier3 | shared           | 1  |
| 3  | 153473980 | 151991290 | - | A | 452 | 17 | 0.04 | 280 | 207 | 0.43 | 372 | 236 | 0.39 | 2 | 2 | 2 | tier3 | shared           | 0  |
| 3  | 166457428 | 164974734 | A | T | 509 | 24 | 0.05 | 251 | 179 | 0.42 | 354 | 253 | 0.42 | 2 | 2 | 2 | tier3 | shared           | 1  |
| 3  | 171675662 | 170192968 | C | T | 526 | 16 | 0.03 | 240 | 221 | 0.48 | 361 | 235 | 0.39 | 2 | 2 | 2 | tier2 | shared           | 0  |
| 3  | 180628899 | 179146205 | C | A | 458 | 0  | 0.00 | 466 | 0   | 0.00 | 453 | 174 | 0.28 | 2 | 2 | 2 | tier3 | relapse-specific | 0  |
| 3  | 183327651 | 181844957 | G | A | 700 | 1  | 0.00 | 591 | 0   | 0.00 | 634 | 186 | 0.23 | 2 | 2 | 2 | tier3 | relapse-specific | 1  |
| 3  | 186069932 | 184587238 | T | A | 449 | 16 | 0.03 | 204 | 165 | 0.45 | 309 | 225 | 0.42 | 2 | 2 | 2 | tier3 | shared           | 0  |
| 3  | 187605648 | 186122954 | G | A | 266 | 9  | 0.03 | 149 | 125 | 0.46 | 207 | 131 | 0.39 | 2 | 2 | 2 | tier3 | shared           | 1  |
| 3  | 189465626 | 187982932 | C | T | 576 | 23 | 0.04 | 257 | 222 | 0.46 | 407 | 256 | 0.39 | 2 | 2 | 2 | tier3 | shared           | 0  |
| 3  | 193663399 | 192180705 | G | A | 426 | 17 | 0.04 | 229 | 196 | 0.46 | 362 | 239 | 0.40 | 2 | 2 | 2 | tier3 | shared           | 0  |
| 3  | 194260045 | 192777351 | G | C | 332 | 11 | 0.03 | 161 | 120 | 0.43 | 258 | 183 | 0.41 | 2 | 2 | 2 | tier3 | shared           | 1  |
| 3  | 25100911  | 25125907  | - | T | 403 | 24 | 0.06 | 199 | 82  | 0.29 | 283 | 143 | 0.34 | 2 | 2 | 2 | tier3 | shared           | 1  |

|   |           |           |       |   |     |    |      |     |     |      |     |     |      |   |   |   |       |                  |   |
|---|-----------|-----------|-------|---|-----|----|------|-----|-----|------|-----|-----|------|---|---|---|-------|------------------|---|
| 3 | 25371167  | 25396163  | CTATT | - | 416 | 24 | 0.05 | 269 | 270 | 0.50 | 380 | 291 | 0.43 | 2 | 2 | 2 | tier3 | shared           | 0 |
| 3 | 26667767  | 26692763  | A     | G | 554 | 14 | 0.02 | 325 | 272 | 0.46 | 377 | 276 | 0.42 | 2 | 2 | 2 | tier3 | shared           | 0 |
| 3 | 26879029  | 26904025  | A     | G | 405 | 13 | 0.03 | 185 | 137 | 0.43 | 312 | 199 | 0.39 | 2 | 2 | 2 | tier3 | shared           | 1 |
| 3 | 29917464  | 29942460  | T     | - | 248 | 9  | 0.04 | 152 | 114 | 0.43 | 227 | 109 | 0.32 | 2 | 2 | 2 | tier3 | shared           | 0 |
| 3 | 38713408  | 38738404  | G     | A | 580 | 15 | 0.03 | 326 | 306 | 0.48 | 472 | 303 | 0.39 | 2 | 2 | 2 | tier3 | shared           | 2 |
| 3 | 41001684  | 41026680  | T     | A | 526 | 18 | 0.03 | 278 | 279 | 0.50 | 437 | 305 | 0.41 | 2 | 2 | 2 | tier3 | shared           | 1 |
| 3 | 43881260  | 43906256  | C     | T | 620 | 0  | 0.00 | 746 | 1   | 0.00 | 615 | 187 | 0.23 | 2 | 2 | 2 | tier3 | relapse-specific | 1 |
| 3 | 43928562  | 43953558  | G     | A | 320 | 5  | 0.02 | 129 | 125 | 0.49 | 226 | 152 | 0.40 | 2 | 2 | 2 | tier3 | shared           | 1 |
| 3 | 46659901  | 46684897  | G     | A | 624 | 0  | 0.00 | 671 | 1   | 0.00 | 594 | 155 | 0.21 | 2 | 2 | 2 | tier3 | relapse-specific | 0 |
| 3 | 54627493  | 54652453  | G     | C | 161 | 4  | 0.02 | 84  | 59  | 0.41 | 116 | 60  | 0.34 | 2 | 2 | 2 | tier3 | shared           | 3 |
| 3 | 58516597  | 58541557  | T     | C | 468 | 18 | 0.04 | 203 | 167 | 0.45 | 338 | 219 | 0.39 | 2 | 2 | 2 | tier3 | shared           | 0 |
| 3 | 61372165  | 61397125  | G     | A | 656 | 21 | 0.03 | 344 | 301 | 0.47 | 467 | 313 | 0.40 | 2 | 2 | 2 | tier3 | shared           | 1 |
| 3 | 61429642  | 61454602  | T     | A | 513 | 16 | 0.03 | 269 | 221 | 0.45 | 336 | 261 | 0.44 | 2 | 2 | 2 | tier3 | shared           | 1 |
| 3 | 65299751  | 65324711  | T     | A | 390 | 15 | 0.04 | 208 | 193 | 0.48 | 302 | 209 | 0.41 | 2 | 2 | 2 | tier3 | shared           | 2 |
| 3 | 70355775  | 70273085  | C     | A | 405 | 15 | 0.04 | 196 | 196 | 0.50 | 213 | 231 | 0.52 | 2 | 2 | 2 | tier3 | shared           | 0 |
| 3 | 70426028  | 70343338  | C     | - | 233 | 3  | 0.01 | 122 | 49  | 0.29 | 189 | 108 | 0.36 | 2 | 2 | 2 | tier3 | shared           | 0 |
| 3 | 70705960  | 70623270  | A     | G | 617 | 22 | 0.03 | 308 | 269 | 0.47 | 442 | 299 | 0.40 | 2 | 2 | 2 | tier3 | shared           | 0 |
| 3 | 71707904  | 71625214  | T     | C | 571 | 16 | 0.03 | 302 | 259 | 0.46 | 449 | 296 | 0.40 | 2 | 2 | 2 | tier3 | shared           | 1 |
| 3 | 76089380  | 76006690  | C     | G | 155 | 3  | 0.02 | 75  | 37  | 0.33 | 114 | 70  | 0.38 | 2 | 2 | 2 | tier3 | shared           | 2 |
| 3 | 7744284   | 7769284   | G     | A | 507 | 19 | 0.04 | 353 | 305 | 0.46 | 444 | 345 | 0.44 | 2 | 2 | 2 | tier3 | shared           | 1 |
| 3 | 77822159  | 77739469  | G     | A | 709 | 18 | 0.02 | 465 | 331 | 0.42 | 598 | 358 | 0.37 | 2 | 2 | 2 | tier2 | shared           | 2 |
| 3 | 83746577  | 83663887  | C     | A | 767 | 19 | 0.02 | 420 | 365 | 0.46 | 575 | 403 | 0.41 | 2 | 2 | 2 | tier3 | shared           | 1 |
| 3 | 86549928  | 86467238  | C     | T | 380 | 13 | 0.03 | 245 | 210 | 0.46 | 367 | 214 | 0.37 | 2 | 2 | 2 | tier3 | shared           | 1 |
| 3 | 96394238  | 94911548  | A     | G | 652 | 0  | 0.00 | 476 | 0   | 0.00 | 551 | 183 | 0.25 | 2 | 2 | 2 | tier3 | relapse-specific | 1 |
| 3 | 96664353  | 95181663  | G     | T | 173 | 7  | 0.04 | 92  | 158 | 0.63 | 135 | 138 | 0.51 | 2 | 2 | 2 | tier3 | shared           | 1 |
| 3 | 97027688  | 95544998  | -     | T | 367 | 10 | 0.03 | 140 | 114 | 0.45 | 294 | 180 | 0.38 | 2 | 2 | 2 | tier3 | shared           | 1 |
| 4 | 102222433 | 102003410 | G     | A | 805 | 29 | 0.03 | 447 | 400 | 0.47 | 607 | 409 | 0.40 | 2 | 2 | 2 | tier3 | shared           | 1 |
| 4 | 105638488 | 105419039 | A     | T | 497 | 15 | 0.03 | 291 | 270 | 0.48 | 375 | 272 | 0.42 | 2 | 2 | 2 | tier3 | shared           | 0 |
| 4 | 106213224 | 105993775 | G     | A | 262 | 12 | 0.04 | 132 | 105 | 0.44 | 175 | 128 | 0.42 | 2 | 2 | 2 | tier3 | shared           | 0 |
| 4 | 123096911 | 122877461 | C     | T | 586 | 0  | 0.00 | 633 | 0   | 0.00 | 509 | 105 | 0.17 | 2 | 2 | 2 | tier3 | relapse-specific | 0 |
| 4 | 127372675 | 127153225 | T     | - | 349 | 8  | 0.02 | 154 | 111 | 0.42 | 286 | 170 | 0.37 | 2 | 2 | 2 | tier3 | shared           | 1 |
| 4 | 131446209 | 131226759 | A     | - | 358 | 9  | 0.02 | 212 | 160 | 0.43 | 325 | 192 | 0.37 | 2 | 2 | 2 | tier3 | shared           | 1 |
| 4 | 132093722 | 131874272 | T     | G | 183 | 0  | 0.00 | 159 | 0   | 0.00 | 263 | 67  | 0.20 | 2 | 2 | 2 | tier2 | relapse-specific | 1 |
| 4 | 133175523 | 132956073 | T     | G | 406 | 0  | 0.00 | 363 | 0   | 0.00 | 328 | 109 | 0.25 | 2 | 2 | 2 | tier3 | relapse-specific | 1 |
| 4 | 135294719 | 135075269 | A     | C | 173 | 8  | 0.04 | 137 | 108 | 0.44 | 195 | 126 | 0.39 | 2 | 2 | 2 | tier3 | shared           | 1 |
| 4 | 136837154 | 136617704 | A     | T | 450 | 0  | 0.00 | 360 | 24  | 0.06 | 403 | 139 | 0.26 | 2 | 2 | 2 | tier3 | shared           | 1 |
| 4 | 144623658 | 144404208 | A     | G | 475 | 15 | 0.03 | 191 | 166 | 0.46 | 301 | 208 | 0.41 | 2 | 2 | 2 | tier3 | shared           | 0 |
| 4 | 146963640 | 146744190 | T     | C | 440 | 11 | 0.02 | 245 | 190 | 0.44 | 298 | 193 | 0.39 | 2 | 2 | 2 | tier3 | shared           | 1 |
| 4 | 149100761 | 148881311 | G     | A | 244 | 9  | 0.04 | 104 | 69  | 0.40 | 205 | 79  | 0.28 | 2 | 2 | 2 | tier3 | shared           | 0 |
| 4 | 151749822 | 151530372 | T     | C | 677 | 27 | 0.04 | 402 | 352 | 0.47 | 555 | 339 | 0.38 | 2 | 2 | 2 | tier3 | shared           | 1 |

|   |           |           |       |    |     |    |      |     |     |      |     |     |      |   |   |   |       |                  |   |
|---|-----------|-----------|-------|----|-----|----|------|-----|-----|------|-----|-----|------|---|---|---|-------|------------------|---|
| 4 | 155602163 | 155382713 | T     | C  | 285 | 11 | 0.04 | 140 | 103 | 0.42 | 241 | 140 | 0.37 | 2 | 2 | 2 | tier3 | shared           | 2 |
| 4 | 158808993 | 158589543 | -     | TA | 230 | 5  | 0.02 | 141 | 89  | 0.39 | 232 | 113 | 0.33 | 2 | 2 | 2 | tier3 | shared           | 1 |
| 4 | 166654234 | 166434784 | A     | G  | 573 | 25 | 0.04 | 291 | 251 | 0.46 | 405 | 255 | 0.39 | 2 | 2 | 2 | tier3 | shared           | 0 |
| 4 | 167528552 | 167309102 | -     | T  | 586 | 0  | 0.00 | 598 | 0   | 0.00 | 571 | 166 | 0.23 | 2 | 2 | 2 | tier3 | relapse-specific | 1 |
| 4 | 168488170 | 168251595 | C     | T  | 54  | 4  | 0.07 | 34  | 16  | 0.32 | 32  | 29  | 0.48 | 2 | 2 | 2 | tier3 | shared           | 1 |
| 4 | 172620653 | 172384078 | C     | T  | 411 | 10 | 0.02 | 240 | 148 | 0.38 | 339 | 176 | 0.34 | 2 | 2 | 2 | tier3 | shared           | 1 |
| 4 | 173742874 | 173506299 | A     | T  | 409 | 9  | 0.02 | 144 | 121 | 0.46 | 251 | 176 | 0.41 | 2 | 2 | 2 | tier3 | shared           | 1 |
| 4 | 177658050 | 177421056 | T     | A  | 539 | 11 | 0.02 | 310 | 187 | 0.38 | 393 | 264 | 0.40 | 2 | 2 | 2 | tier3 | shared           | 1 |
| 4 | 179536441 | 179299447 | T     | C  | 533 | 22 | 0.04 | 249 | 239 | 0.49 | 362 | 249 | 0.41 | 2 | 2 | 2 | tier2 | shared           | 0 |
| 4 | 187856479 | 187619485 | C     | G  | 621 | 16 | 0.03 | 377 | 265 | 0.41 | 433 | 281 | 0.39 | 2 | 2 | 2 | tier3 | shared           | 3 |
| 4 | 190264978 | 190027984 | A     | -  | 557 | 18 | 0.03 | 257 | 135 | 0.34 | 340 | 160 | 0.32 | 2 | 2 | 2 | tier3 | shared           | 1 |
| 4 | 20622587  | 21013489  | T     | -  | 614 | 25 | 0.04 | 292 | 232 | 0.44 | 326 | 262 | 0.45 | 2 | 2 | 2 | tier3 | shared           | 0 |
| 4 | 26348426  | 26739328  | G     | A  | 417 | 8  | 0.02 | 303 | 190 | 0.39 | 378 | 278 | 0.42 | 2 | 2 | 2 | tier3 | shared           | 0 |
| 4 | 27322546  | 27713448  | G     | A  | 541 | 13 | 0.02 | 256 | 230 | 0.47 | 366 | 243 | 0.40 | 2 | 2 | 2 | tier2 | shared           | 1 |
| 4 | 27863801  | 28254703  | T     | C  | 329 | 0  | 0.00 | 238 | 0   | 0.00 | 321 | 77  | 0.19 | 2 | 2 | 2 | tier3 | relapse-specific | 1 |
| 4 | 29671519  | 30062421  | G     | A  | 441 | 11 | 0.02 | 282 | 208 | 0.42 | 373 | 240 | 0.39 | 2 | 2 | 2 | tier3 | shared           | 1 |
| 4 | 30936847  | 31327749  | G     | C  | 472 | 17 | 0.03 | 246 | 180 | 0.42 | 335 | 256 | 0.43 | 2 | 2 | 2 | tier3 | shared           | 1 |
| 4 | 32406119  | 32762221  | T     | C  | 455 | 11 | 0.02 | 200 | 196 | 0.49 | 301 | 210 | 0.41 | 2 | 2 | 2 | tier3 | shared           | 1 |
| 4 | 32648103  | 32971708  | G     | T  | 846 | 19 | 0.02 | 494 | 310 | 0.39 | 575 | 360 | 0.39 | 2 | 2 | 2 | tier2 | shared           | 1 |
| 4 | 33033308  | 33356913  | T     | C  | 528 | 25 | 0.05 | 284 | 236 | 0.45 | 403 | 264 | 0.40 | 2 | 2 | 2 | tier3 | shared           | 1 |
| 4 | 33460727  | 33784332  | G     | A  | 352 | 9  | 0.02 | 236 | 200 | 0.46 | 378 | 246 | 0.39 | 2 | 2 | 2 | tier3 | shared           | 1 |
| 4 | 34614695  | 34938300  | G     | T  | 425 | 13 | 0.03 | 239 | 180 | 0.43 | 328 | 263 | 0.45 | 2 | 2 | 2 | tier3 | shared           | 0 |
| 4 | 43289838  | 43595081  | C     | T  | 63  | 2  | 0.03 | 42  | 16  | 0.28 | 75  | 24  | 0.24 | 2 | 2 | 2 | tier3 | shared           | 0 |
| 4 | 43766916  | 44072159  | C     | A  | 543 | 11 | 0.02 | 259 | 190 | 0.42 | 441 | 268 | 0.38 | 2 | 2 | 2 | tier3 | shared           | 1 |
| 4 | 43929949  | 44235192  | A     | G  | 215 | 6  | 0.03 | 138 | 92  | 0.40 | 225 | 175 | 0.44 | 2 | 2 | 2 | tier3 | shared           | 0 |
| 4 | 44399958  | 44705201  | T     | C  | 473 | 16 | 0.03 | 215 | 182 | 0.46 | 326 | 213 | 0.40 | 2 | 2 | 2 | tier2 | shared           | 0 |
| 4 | 45425271  | 45730514  | A     | G  | 509 | 16 | 0.03 | 295 | 251 | 0.46 | 423 | 241 | 0.36 | 2 | 2 | 2 | tier3 | shared           | 1 |
| 4 | 5256393   | 5205492   | C     | T  | 542 | 15 | 0.03 | 364 | 303 | 0.45 | 440 | 306 | 0.41 | 2 | 2 | 2 | tier3 | shared           | 0 |
| 4 | 57033214  | 57338457  | A     | T  | 466 | 12 | 0.03 | 246 | 186 | 0.43 | 366 | 213 | 0.37 | 2 | 2 | 2 | tier3 | shared           | 0 |
| 4 | 60674007  | 60991412  | G     | A  | 367 | 10 | 0.03 | 157 | 126 | 0.45 | 338 | 231 | 0.41 | 2 | 2 | 2 | tier2 | shared           | 1 |
| 4 | 64297194  | 64614599  | G     | T  | 403 | 16 | 0.04 | 220 | 204 | 0.48 | 349 | 255 | 0.42 | 2 | 2 | 2 | tier3 | shared           | 1 |
| 4 | 65007608  | 65325013  | G     | C  | 391 | 0  | 0.00 | 366 | 0   | 0.00 | 414 | 145 | 0.26 | 2 | 2 | 2 | tier3 | relapse-specific | 0 |
| 4 | 70908682  | 70874093  | C     | A  | 556 | 19 | 0.03 | 182 | 183 | 0.50 | 332 | 208 | 0.39 | 2 | 2 | 2 | tier3 | shared           | 0 |
| 4 | 78407748  | 78188724  | C     | G  | 544 | 15 | 0.03 | 364 | 282 | 0.44 | 443 | 308 | 0.41 | 2 | 2 | 2 | tier3 | shared           | 1 |
| 4 | 79998292  | 79779268  | T     | G  | 183 | 6  | 0.03 | 73  | 58  | 0.44 | 159 | 88  | 0.36 | 2 | 2 | 2 | tier3 | shared           | 1 |
| 4 | 85982354  | 85763330  | AGAAA | -  | 382 | 16 | 0.04 | 171 | 161 | 0.48 | 255 | 176 | 0.41 | 2 | 2 | 2 | tier3 | shared           | 1 |
| 4 | 87888195  | 87669171  | T     | A  | 421 | 11 | 0.03 | 220 | 173 | 0.44 | 334 | 189 | 0.36 | 2 | 2 | 2 | tier2 | shared           | 0 |
| 4 | 97422140  | 97203117  | C     | T  | 556 | 21 | 0.04 | 321 | 279 | 0.47 | 446 | 233 | 0.34 | 2 | 2 | 2 | tier3 | shared           | 1 |
| 5 | 106134513 | 106106614 | G     | A  | 296 | 11 | 0.04 | 135 | 68  | 0.33 | 232 | 104 | 0.31 | 2 | 2 | 2 | tier3 | shared           | 1 |
| 5 | 10790593  | 10737593  | A     | -  | 648 | 22 | 0.03 | 367 | 333 | 0.48 | 522 | 334 | 0.39 | 2 | 2 | 2 | tier3 | shared           | 0 |

|   |           |           |   |   |     |    |      |     |     |      |     |     |      |   |   |   |       |                  |   |
|---|-----------|-----------|---|---|-----|----|------|-----|-----|------|-----|-----|------|---|---|---|-------|------------------|---|
| 5 | 129560241 | 129532342 | C | T | 494 | 15 | 0.03 | 320 | 231 | 0.42 | 366 | 277 | 0.43 | 2 | 2 | 2 | tier3 | shared           | 0 |
| 5 | 136620525 | 136592626 | C | T | 564 | 14 | 0.02 | 289 | 229 | 0.44 | 347 | 240 | 0.41 | 2 | 2 | 2 | tier3 | shared           | 0 |
| 5 | 143073237 | 143093044 | C | T | 580 | 26 | 0.04 | 274 | 205 | 0.43 | 399 | 298 | 0.43 | 2 | 2 | 2 | tier3 | shared           | 1 |
| 5 | 144024078 | 144043885 | C | T | 512 | 10 | 0.02 | 333 | 217 | 0.39 | 406 | 255 | 0.39 | 2 | 2 | 2 | tier2 | shared           | 1 |
| 5 | 155277328 | 155344750 | T | G | 571 | 16 | 0.03 | 287 | 265 | 0.48 | 387 | 242 | 0.38 | 2 | 2 | 2 | tier3 | shared           | 1 |
| 5 | 158909817 | 158977239 | G | T | 565 | 26 | 0.04 | 326 | 303 | 0.48 | 426 | 272 | 0.39 | 2 | 2 | 2 | tier3 | shared           | 1 |
| 5 | 162253309 | 162320731 | C | A | 516 | 16 | 0.03 | 250 | 171 | 0.41 | 416 | 252 | 0.38 | 2 | 2 | 2 | tier3 | shared           | 1 |
| 5 | 164085587 | 164153009 | C | G | 576 | 20 | 0.03 | 317 | 301 | 0.49 | 402 | 273 | 0.40 | 2 | 2 | 2 | tier3 | shared           | 1 |
| 5 | 164711131 | 164778553 | A | G | 469 | 1  | 0.00 | 493 | 0   | 0.00 | 502 | 133 | 0.21 | 2 | 2 | 2 | tier2 | relapse-specific | 1 |
| 5 | 166663641 | 166731063 | G | A | 601 | 23 | 0.04 | 303 | 263 | 0.46 | 502 | 307 | 0.38 | 2 | 2 | 2 | tier3 | shared           | 1 |
| 5 | 172379965 | 172447359 | T | C | 468 | 15 | 0.03 | 263 | 246 | 0.48 | 334 | 216 | 0.39 | 2 | 2 | 2 | tier3 | shared           | 0 |
| 5 | 23368167  | 23332410  | C | A | 654 | 0  | 0.00 | 594 | 2   | 0.00 | 519 | 185 | 0.26 | 2 | 2 | 2 | tier3 | relapse-specific | 2 |
| 5 | 29890034  | 29854277  | C | A | 505 | 13 | 0.03 | 231 | 187 | 0.45 | 351 | 201 | 0.36 | 2 | 2 | 2 | tier3 | shared           | 1 |
| 5 | 30118829  | 30083072  | T | C | 519 | 21 | 0.04 | 239 | 227 | 0.49 | 383 | 314 | 0.45 | 2 | 2 | 2 | tier3 | shared           | 1 |
| 5 | 35272873  | 35237116  | T | - | 453 | 13 | 0.03 | 282 | 163 | 0.37 | 407 | 196 | 0.33 | 2 | 2 | 2 | tier3 | shared           | 0 |
| 5 | 4657658   | 4604658   | A | G | 371 | 18 | 0.05 | 188 | 154 | 0.45 | 323 | 186 | 0.37 | 2 | 2 | 2 | tier3 | shared           | 1 |
| 5 | 54085558  | 54049801  | C | T | 481 | 14 | 0.03 | 211 | 200 | 0.49 | 368 | 210 | 0.36 | 2 | 2 | 2 | tier3 | shared           | 1 |
| 5 | 56807873  | 56772116  | T | A | 491 | 0  | 0.00 | 442 | 0   | 0.00 | 410 | 113 | 0.22 | 2 | 2 | 2 | tier3 | relapse-specific | 1 |
| 5 | 5939660   | 5886660   | G | A | 341 | 13 | 0.04 | 165 | 132 | 0.44 | 208 | 116 | 0.36 | 2 | 2 | 2 | tier3 | shared           | 1 |
| 5 | 59821760  | 59786003  | G | C | 712 | 25 | 0.03 | 434 | 380 | 0.47 | 533 | 375 | 0.41 | 2 | 2 | 2 | tier3 | shared           | 0 |
| 5 | 60905114  | 60869357  | T | C | 531 | 15 | 0.03 | 286 | 238 | 0.45 | 372 | 234 | 0.39 | 2 | 2 | 2 | tier3 | shared           | 0 |
| 5 | 62962549  | 62926793  | T | C | 589 | 34 | 0.05 | 285 | 239 | 0.46 | 403 | 244 | 0.38 | 2 | 2 | 2 | tier3 | shared           | 1 |
| 5 | 66984919  | 66949163  | A | T | 445 | 16 | 0.03 | 202 | 145 | 0.42 | 357 | 195 | 0.35 | 2 | 2 | 2 | tier3 | shared           | 1 |
| 5 | 72501813  | 72466057  | C | T | 691 | 18 | 0.03 | 364 | 291 | 0.44 | 495 | 325 | 0.40 | 2 | 2 | 2 | tier3 | shared           | 0 |
| 5 | 77980950  | 77945194  | A | C | 257 | 7  | 0.03 | 140 | 111 | 0.44 | 202 | 114 | 0.36 | 2 | 2 | 2 | tier2 | shared           | 0 |
| 5 | 80359649  | 80323893  | G | T | 461 | 13 | 0.03 | 237 | 193 | 0.45 | 353 | 237 | 0.40 | 2 | 2 | 2 | tier3 | shared           | 0 |
| 5 | 8368772   | 8315772   | C | T | 481 | 14 | 0.03 | 235 | 178 | 0.43 | 354 | 233 | 0.40 | 2 | 2 | 2 | tier3 | shared           | 1 |
| 5 | 85146323  | 85110567  | T | A | 575 | 14 | 0.02 | 317 | 263 | 0.45 | 442 | 274 | 0.38 | 2 | 2 | 2 | tier3 | shared           | 1 |
| 5 | 89232964  | 89197208  | A | G | 615 | 23 | 0.04 | 318 | 265 | 0.45 | 486 | 307 | 0.39 | 2 | 2 | 2 | tier2 | shared           | 0 |
| 5 | 95051120  | 95025364  | T | C | 407 | 16 | 0.04 | 188 | 200 | 0.52 | 298 | 172 | 0.37 | 2 | 2 | 2 | tier3 | shared           | 0 |
| 5 | 97908635  | 97880735  | A | T | 639 | 25 | 0.04 | 360 | 312 | 0.46 | 475 | 344 | 0.42 | 2 | 2 | 2 | tier3 | shared           | 0 |
| 5 | 98984803  | 98956904  | T | C | 415 | 22 | 0.05 | 289 | 186 | 0.39 | 359 | 204 | 0.36 | 2 | 2 | 2 | tier3 | shared           | 1 |
| 6 | 100964840 | 100858119 | G | T | 253 | 1  | 0.00 | 143 | 93  | 0.39 | 212 | 97  | 0.31 | 2 | 2 | 2 | tier3 | shared           | 0 |
| 6 | 103679228 | 103572535 | G | T | 470 | 10 | 0.02 | 249 | 187 | 0.43 | 364 | 208 | 0.36 | 2 | 2 | 2 | tier3 | shared           | 1 |
| 6 | 109550234 | 109443541 | C | T | 478 | 1  | 0.00 | 487 | 0   | 0.00 | 460 | 143 | 0.24 | 2 | 2 | 2 | tier3 | relapse-specific | 0 |
| 6 | 112245364 | 112138671 | C | T | 492 | 0  | 0.00 | 494 | 1   | 0.00 | 545 | 138 | 0.20 | 2 | 2 | 2 | tier3 | relapse-specific | 0 |
| 6 | 115799962 | 115693269 | C | G | 598 | 0  | 0.00 | 523 | 0   | 0.00 | 555 | 148 | 0.21 | 2 | 2 | 2 | tier3 | relapse-specific | 0 |
| 6 | 120201343 | 120159644 | T | G | 445 | 12 | 0.03 | 187 | 188 | 0.50 | 332 | 188 | 0.36 | 2 | 2 | 2 | tier3 | shared           | 0 |
| 6 | 125941858 | 125900159 | C | A | 636 | 23 | 0.03 | 317 | 307 | 0.49 | 506 | 310 | 0.38 | 2 | 2 | 2 | tier3 | shared           | 1 |
| 6 | 126353    | 181353    | T | G | 415 | 0  | 0.00 | 391 | 0   | 0.00 | 358 | 133 | 0.27 | 2 | 2 | 2 | tier3 | relapse-specific | 0 |

|   |           |           |   |   |     |    |      |     |     |      |     |     |      |   |      |      |       |                  |   |
|---|-----------|-----------|---|---|-----|----|------|-----|-----|------|-----|-----|------|---|------|------|-------|------------------|---|
| 6 | 128556820 | 128515127 | A | G | 332 | 11 | 0.03 | 192 | 157 | 0.45 | 314 | 179 | 0.36 | 2 | 2    | 2    | tier3 | shared           | 0 |
| 6 | 12879500  | 12771514  | G | A | 508 | 11 | 0.02 | 243 | 195 | 0.45 | 392 | 248 | 0.39 | 2 | 2    | 2    | tier2 | shared           | 1 |
| 6 | 132513792 | 132472099 | C | T | 164 | 0  | 0.00 | 314 | 1   | 0.00 | 342 | 98  | 0.22 | 2 | 2    | 2    | tier3 | relapse-specific | 1 |
| 6 | 145464261 | 145422568 | C | A | 595 | 14 | 0.02 | 346 | 295 | 0.46 | 481 | 281 | 0.37 | 2 | 2    | 2    | tier3 | shared           | 1 |
| 6 | 152466599 | 152424906 | A | G | 359 | 14 | 0.04 | 231 | 143 | 0.38 | 373 | 171 | 0.31 | 2 | 2    | 2    | tier3 | shared           | 1 |
| 6 | 160834989 | 160914999 | G | A | 433 | 11 | 0.02 | 255 | 222 | 0.47 | 357 | 234 | 0.40 | 2 | 2    | 2    | tier3 | shared           | 0 |
| 6 | 164206563 | 164286573 | C | A | 582 | 27 | 0.04 | 263 | 224 | 0.46 | 364 | 223 | 0.38 | 2 | 2    | 2    | tier2 | shared           | 0 |
| 6 | 25158617  | 25050638  | A | G | 437 | 13 | 0.03 | 201 | 183 | 0.48 | 316 | 228 | 0.42 | 2 | 2    | 2    | tier3 | shared           | 0 |
| 6 | 29047696  | 28939717  | T | C | 526 | 25 | 0.05 | 403 | 270 | 0.40 | 475 | 287 | 0.38 | 2 | 2    | 2    | tier2 | shared           | 0 |
| 6 | 41242986  | 41135008  | C | T | 712 | 19 | 0.03 | 442 | 376 | 0.46 | 542 | 358 | 0.40 | 2 | 2    | 2    | tier3 | shared           | 0 |
| 6 | 50085720  | 49977761  | A | G | 420 | 13 | 0.03 | 199 | 191 | 0.49 | 349 | 216 | 0.38 | 2 | 2    | 2    | tier3 | shared           | 0 |
| 6 | 51664683  | 51556724  | C | T | 706 | 15 | 0.02 | 460 | 371 | 0.45 | 523 | 382 | 0.42 | 2 | 2    | 2    | tier3 | shared           | 4 |
| 6 | 6270551   | 6325552   | C | G | 543 | 16 | 0.03 | 284 | 235 | 0.45 | 343 | 245 | 0.42 | 2 | 2    | 2    | tier2 | shared           | 0 |
| 6 | 6797368   | 6852369   | G | T | 584 | 20 | 0.03 | 246 | 211 | 0.46 | 385 | 235 | 0.38 | 2 | 2    | 2    | tier3 | shared           | 1 |
| 6 | 68090304  | 68033583  | T | G | 248 | 0  | 0.00 | 283 | 0   | 0.00 | 340 | 115 | 0.25 | 2 | 2    | 2    | tier3 | relapse-specific | 1 |
| 6 | 71700473  | 71643752  | C | T | 558 | 18 | 0.03 | 326 | 240 | 0.42 | 403 | 291 | 0.42 | 2 | 2    | 2    | tier3 | shared           | 0 |
| 6 | 760755    | 815755    | G | T | 671 | 24 | 0.03 | 419 | 314 | 0.43 | 536 | 303 | 0.36 | 2 | 2    | 2    | tier3 | shared           | 0 |
| 6 | 77430774  | 77374055  | G | T | 736 | 0  | 0.00 | 603 | 1   | 0.00 | 642 | 174 | 0.21 | 2 | 2    | 2    | tier3 | relapse-specific | 0 |
| 6 | 86029763  | 85973044  | T | G | 145 | 0  | 0.00 | 158 | 0   | 0.00 | 190 | 33  | 0.15 | 2 | 2    | 2    | tier3 | relapse-specific | 0 |
| 6 | 94768681  | 94711960  | G | T | 563 | 0  | 0.00 | 456 | 0   | 0.00 | 500 | 119 | 0.19 | 2 | 2    | 2    | tier3 | relapse-specific | 1 |
| 6 | 95656550  | 95599829  | T | A | 516 | 18 | 0.03 | 279 | 222 | 0.44 | 414 | 259 | 0.38 | 2 | 2    | 2    | tier2 | shared           | 1 |
| 6 | 9844264   | 9736278   | G | T | 446 | 0  | 0.00 | 394 | 0   | 0.00 | 390 | 134 | 0.26 | 2 | 2    | 2    | tier3 | relapse-specific | 0 |
| 6 | 9879721   | 9771735   | A | G | 559 | 11 | 0.02 | 252 | 226 | 0.47 | 439 | 281 | 0.39 | 2 | 2    | 2    | tier3 | shared           | 0 |
| 7 | 104147320 | 104360084 | G | A | 347 | 1  | 0.00 | 302 | 0   | 0.00 | 343 | 66  | 0.16 | 2 | 2    | 2    | tier2 | relapse-specific | 0 |
| 7 | 115210833 | 115423597 | A | G | 384 | 8  | 0.02 | 149 | 145 | 0.49 | 272 | 195 | 0.42 | 2 | 2    | 2    | tier2 | shared           | 0 |
| 7 | 119521788 | 119734552 | G | A | 434 | 7  | 0.02 | 247 | 171 | 0.41 | 366 | 245 | 0.40 | 2 | 2    | 2    | tier3 | shared           | 1 |
| 7 | 12126246  | 12159721  | C | T | 457 | 17 | 0.04 | 219 | 180 | 0.45 | 324 | 229 | 0.41 | 2 | 2    | 2    | tier2 | shared           | 1 |
| 7 | 126601885 | 126814649 | C | A | 557 | 15 | 0.03 | 310 | 211 | 0.40 | 396 | 243 | 0.38 | 2 | 2    | 2    | tier3 | shared           | 2 |
| 7 | 131565950 | 131915410 | C | A | 559 | 16 | 0.03 | 313 | 264 | 0.46 | 437 | 266 | 0.38 | 2 | 2    | 2    | tier2 | shared           | 1 |
| 7 | 134214919 | 134564379 | G | A | 427 | 11 | 0.03 | 200 | 147 | 0.42 | 350 | 197 | 0.36 | 2 | 2    | 2    | tier3 | shared           | 1 |
| 7 | 13880370  | 13913845  | G | C | 493 | 0  | 0.00 | 393 | 0   | 0.00 | 404 | 146 | 0.27 | 2 | 2    | 2    | tier3 | relapse-specific | 0 |
| 7 | 142327817 | 142617695 | C | T | 389 | 13 | 0.03 | 205 | 167 | 0.45 | 274 | 180 | 0.40 | 2 | 2    | 2    | tier3 | shared           | 1 |
| 7 | 149471862 | 149840929 | C | A | 396 | 3  | 0.01 | 313 | 122 | 0.28 | 358 | 99  | 0.22 | 2 | 1.28 | 1.24 | tier3 | shared           | 1 |
| 7 | 155869626 | 156176865 | A | G | 404 | 0  | 0.00 | 387 | 0   | 0.00 | 361 | 101 | 0.22 | 2 | 2    | 2    | tier3 | relapse-specific | 1 |
| 7 | 157069965 | 157377204 | G | A | 490 | 10 | 0.02 | 240 | 199 | 0.45 | 344 | 236 | 0.41 | 2 | 2    | 2    | tier3 | shared           | 2 |
| 7 | 18705925  | 18739400  | T | A | 334 | 13 | 0.04 | 179 | 167 | 0.48 | 285 | 192 | 0.40 | 2 | 2    | 2    | tier3 | shared           | 0 |
| 7 | 22672103  | 22705578  | G | A | 486 | 15 | 0.03 | 257 | 183 | 0.42 | 320 | 190 | 0.37 | 2 | 2    | 2    | tier2 | shared           | 0 |
| 7 | 29252234  | 29285709  | G | C | 611 | 26 | 0.04 | 308 | 315 | 0.51 | 473 | 346 | 0.42 | 2 | 2    | 2    | tier3 | shared           | 0 |
| 7 | 39559272  | 39592747  | C | G | 59  | 0  | 0.00 | 74  | 0   | 0.00 | 65  | 39  | 0.38 | 2 | 2    | 2    | tier3 | relapse-specific | 0 |

|   |           |           |   |   |     |    |      |     |     |      |     |     |      |   |      |     |       |                  |   |
|---|-----------|-----------|---|---|-----|----|------|-----|-----|------|-----|-----|------|---|------|-----|-------|------------------|---|
| 7 | 4036784   | 4070258   | G | A | 573 | 23 | 0.04 | 315 | 287 | 0.48 | 341 | 295 | 0.46 | 2 | 2    | 2   | tier3 | shared           | 2 |
| 7 | 41326642  | 41360117  | C | T | 568 | 7  | 0.01 | 410 | 69  | 0.14 | 680 | 29  | 0.04 | 2 | 2    | 2   | tier3 | shared           | 1 |
| 7 | 43464046  | 43497521  | C | G | 585 | 15 | 0.03 | 306 | 283 | 0.48 | 506 | 316 | 0.38 | 2 | 2    | 2   | tier2 | shared           | 3 |
| 7 | 46307899  | 46341374  | G | T | 327 | 11 | 0.03 | 207 | 134 | 0.39 | 324 | 218 | 0.40 | 2 | 2    | 2   | tier3 | shared           | 1 |
| 7 | 50496712  | 50529218  | C | T | 557 | 19 | 0.03 | 242 | 235 | 0.49 | 422 | 281 | 0.40 | 2 | 2    | 2   | tier3 | shared           | 0 |
| 7 | 50688673  | 50721179  | C | T | 421 | 5  | 0.01 | 282 | 163 | 0.37 | 315 | 207 | 0.40 | 2 | 2    | 2   | tier3 | shared           | 1 |
| 7 | 51623845  | 51656351  | C | T | 450 | 5  | 0.01 | 262 | 224 | 0.46 | 357 | 213 | 0.37 | 2 | 2    | 2   | tier3 | shared           | 0 |
| 7 | 55323684  | 55356190  | A | G | 505 | 0  | 0.00 | 485 | 0   | 0.00 | 606 | 118 | 0.16 | 2 | 2    | 2   | tier3 | relapse-specific | 1 |
| 7 | 57084750  | 57080808  | G | A | 293 | 11 | 0.04 | 207 | 149 | 0.42 | 236 | 162 | 0.41 | 2 | 0.37 | 0.3 | tier3 | shared           | 0 |
| 7 | 6427925   | 6461400   | C | T | 519 | 20 | 0.04 | 312 | 265 | 0.46 | 434 | 261 | 0.38 | 2 | 2    | 2   | tier1 | shared           | 2 |
| 7 | 65216367  | 65578932  | A | G | 409 | 21 | 0.05 | 265 | 184 | 0.41 | 291 | 212 | 0.42 | 2 | 2    | 2   | tier2 | shared           | 0 |
| 7 | 66462325  | 66824890  | A | C | 483 | 13 | 0.03 | 239 | 189 | 0.44 | 350 | 197 | 0.36 | 2 | 2    | 2   | tier3 | shared           | 0 |
| 7 | 70603061  | 70965125  | G | A | 326 | 14 | 0.04 | 184 | 170 | 0.48 | 260 | 163 | 0.39 | 2 | 2    | 2   | tier3 | shared           | 1 |
| 7 | 70978440  | 71340504  | T | C | 541 | 15 | 0.03 | 265 | 244 | 0.48 | 381 | 331 | 0.46 | 2 | 2    | 2   | tier3 | shared           | 0 |
| 7 | 71113423  | 71475487  | G | A | 518 | 19 | 0.04 | 281 | 195 | 0.41 | 377 | 249 | 0.40 | 2 | 2    | 2   | tier3 | shared           | 0 |
| 7 | 71598329  | 71960393  | G | A | 627 | 23 | 0.04 | 363 | 298 | 0.45 | 493 | 349 | 0.41 | 2 | 2    | 2   | tier3 | shared           | 0 |
| 7 | 75670321  | 75832385  | C | T | 559 | 7  | 0.01 | 344 | 229 | 0.40 | 446 | 297 | 0.40 | 2 | 2    | 2   | tier2 | shared           | 0 |
| 7 | 75860727  | 76022791  | C | T | 171 | 1  | 0.01 | 34  | 42  | 0.55 | 59  | 44  | 0.43 | 2 | 2    | 2   | tier1 | shared           | 1 |
| 7 | 92370959  | 92533023  | C | T | 249 | 7  | 0.03 | 112 | 125 | 0.53 | 268 | 178 | 0.40 | 2 | 2    | 2   | tier3 | shared           | 0 |
| 7 | 9315187   | 9348662   | A | T | 132 | 4  | 0.03 | 109 | 90  | 0.45 | 150 | 111 | 0.43 | 2 | 2    | 2   | tier3 | shared           | 1 |
| 7 | 97325261  | 97487325  | C | A | 343 | 8  | 0.02 | 200 | 169 | 0.46 | 254 | 167 | 0.40 | 2 | 2    | 2   | tier3 | shared           | 0 |
| 8 | 10005611  | 9968201   | C | T | 618 | 25 | 0.04 | 378 | 305 | 0.45 | 460 | 291 | 0.39 | 2 | 2    | 2   | tier3 | shared           | 0 |
| 8 | 101685643 | 101616467 | C | T | 263 | 12 | 0.04 | 139 | 138 | 0.50 | 264 | 197 | 0.43 | 2 | 2    | 2   | tier3 | shared           | 0 |
| 8 | 10238566  | 10201156  | C | T | 425 | 8  | 0.02 | 245 | 192 | 0.44 | 355 | 226 | 0.39 | 2 | 2    | 2   | tier2 | shared           | 0 |
| 8 | 110694461 | 110625285 | G | T | 581 | 18 | 0.03 | 256 | 229 | 0.47 | 417 | 264 | 0.39 | 2 | 2    | 2   | tier3 | shared           | 0 |
| 8 | 112015668 | 111946492 | C | G | 222 | 7  | 0.03 | 97  | 81  | 0.46 | 168 | 117 | 0.41 | 2 | 2    | 2   | tier2 | shared           | 0 |
| 8 | 113428346 | 113359170 | C | T | 331 | 13 | 0.04 | 157 | 123 | 0.44 | 225 | 116 | 0.34 | 2 | 2    | 2   | tier3 | shared           | 2 |
| 8 | 118381845 | 118312664 | C | T | 577 | 0  | 0.00 | 518 | 0   | 0.00 | 539 | 181 | 0.25 | 2 | 2    | 2   | tier3 | relapse-specific | 1 |
| 8 | 124103559 | 124034378 | G | C | 683 | 23 | 0.03 | 283 | 256 | 0.47 | 499 | 323 | 0.39 | 2 | 2    | 2   | tier3 | shared           | 0 |
| 8 | 130991772 | 130922590 | A | C | 561 | 0  | 0.00 | 618 | 0   | 0.00 | 571 | 123 | 0.18 | 2 | 2    | 2   | tier3 | relapse-specific | 0 |
| 8 | 131978742 | 131909560 | G | A | 575 | 13 | 0.02 | 318 | 233 | 0.42 | 406 | 300 | 0.42 | 2 | 2    | 2   | tier3 | shared           | 0 |
| 8 | 137478771 | 137409589 | C | A | 451 | 14 | 0.03 | 228 | 190 | 0.45 | 308 | 240 | 0.44 | 2 | 2    | 2   | tier3 | shared           | 1 |
| 8 | 137478943 | 137409761 | T | C | 284 | 7  | 0.02 | 132 | 102 | 0.44 | 189 | 138 | 0.42 | 2 | 2    | 2   | tier3 | shared           | 1 |
| 8 | 137885795 | 137816613 | A | G | 447 | 7  | 0.02 | 199 | 151 | 0.43 | 295 | 243 | 0.45 | 2 | 2    | 2   | tier3 | shared           | 1 |
| 8 | 138296068 | 138226886 | A | G | 751 | 24 | 0.03 | 404 | 338 | 0.46 | 535 | 359 | 0.40 | 2 | 2    | 2   | tier3 | shared           | 1 |
| 8 | 139453829 | 139384647 | G | A | 370 | 11 | 0.03 | 244 | 187 | 0.43 | 264 | 182 | 0.41 | 2 | 2    | 2   | tier3 | shared           | 0 |
| 8 | 140046412 | 139977230 | T | A | 389 | 13 | 0.03 | 236 | 172 | 0.42 | 292 | 190 | 0.39 | 2 | 2    | 2   | tier3 | shared           | 1 |
| 8 | 140883225 | 140814043 | C | T | 562 | 20 | 0.03 | 400 | 304 | 0.43 | 466 | 280 | 0.38 | 2 | 2    | 2   | tier3 | shared           | 0 |
| 8 | 14429813  | 14385442  | A | - | 573 | 21 | 0.04 | 286 | 187 | 0.40 | 396 | 266 | 0.40 | 2 | 2    | 2   | tier2 | shared           | 0 |
| 8 | 20049776  | 20005496  | T | G | 488 | 17 | 0.03 | 274 | 245 | 0.47 | 359 | 225 | 0.39 | 2 | 2    | 2   | tier3 | shared           | 0 |

|   |           |            |   |   |     |    |      |     |     |      |     |     |      |   |   |   |       |                  |   |
|---|-----------|------------|---|---|-----|----|------|-----|-----|------|-----|-----|------|---|---|---|-------|------------------|---|
| 8 | 20086729  | 20042449   | C | T | 461 | 12 | 0.03 | 267 | 228 | 0.46 | 363 | 200 | 0.36 | 2 | 2 | 2 | tier3 | shared           | 0 |
| 8 | 20387407  | 20343127   | T | C | 673 | 22 | 0.03 | 354 | 294 | 0.45 | 462 | 326 | 0.41 | 2 | 2 | 2 | tier2 | shared           | 1 |
| 8 | 25577832  | 25521915   | C | T | 563 | 21 | 0.04 | 371 | 293 | 0.44 | 402 | 324 | 0.45 | 2 | 2 | 2 | tier2 | shared           | 1 |
| 8 | 35119219  | 34999677   | G | T | 386 | 12 | 0.03 | 285 | 225 | 0.44 | 398 | 272 | 0.41 | 2 | 2 | 2 | tier3 | shared           | 1 |
| 8 | 36327505  | 36207956   | G | A | 457 | 13 | 0.03 | 278 | 169 | 0.38 | 311 | 231 | 0.43 | 2 | 2 | 2 | tier3 | shared           | 0 |
| 8 | 41276618  | 41157461   | G | A | 555 | 11 | 0.02 | 326 | 302 | 0.48 | 392 | 264 | 0.40 | 2 | 2 | 2 | tier3 | shared           | 0 |
| 8 | 4303191   | 4315783    | - | G | 651 | 14 | 0.02 | 363 | 222 | 0.38 | 544 | 312 | 0.36 | 2 | 2 | 2 | tier2 | shared           | 5 |
| 8 | 51018701  | 50856148   | C | T | 440 | 9  | 0.02 | 229 | 190 | 0.45 | 344 | 227 | 0.40 | 2 | 2 | 2 | tier3 | shared           | 1 |
| 8 | 51162090  | 50999537   | A | G | 567 | 16 | 0.03 | 297 | 228 | 0.43 | 444 | 251 | 0.36 | 2 | 2 | 2 | tier3 | shared           | 1 |
| 8 | 51935996  | 51773443   | C | T | 655 | 11 | 0.02 | 369 | 250 | 0.40 | 452 | 298 | 0.40 | 2 | 2 | 2 | tier3 | shared           | 1 |
| 8 | 56681917  | 56519363   | A | G | 502 | 9  | 0.02 | 332 | 300 | 0.47 | 443 | 285 | 0.39 | 2 | 2 | 2 | tier3 | shared           | 1 |
| 8 | 59052455  | 58889901   | T | C | 280 | 9  | 0.03 | 143 | 130 | 0.48 | 224 | 167 | 0.43 | 2 | 2 | 2 | tier3 | shared           | 0 |
| 8 | 62360428  | 62197874   | G | A | 588 | 23 | 0.04 | 234 | 252 | 0.52 | 357 | 253 | 0.41 | 2 | 2 | 2 | tier2 | shared           | 0 |
| 8 | 63596628  | 63434074   | T | A | 435 | 1  | 0.00 | 369 | 2   | 0.01 | 361 | 105 | 0.23 | 2 | 2 | 2 | tier3 | relapse-specific | 0 |
| 8 | 65351175  | 65188621   | C | A | 286 | 13 | 0.04 | 158 | 142 | 0.47 | 315 | 211 | 0.40 | 2 | 2 | 2 | tier3 | shared           | 1 |
| 8 | 66999241  | 66836687   | A | G | 529 | 12 | 0.02 | 264 | 253 | 0.49 | 411 | 221 | 0.35 | 2 | 2 | 2 | tier3 | shared           | 1 |
| 8 | 70656631  | 70494077   | G | A | 566 | 24 | 0.04 | 319 | 275 | 0.46 | 446 | 336 | 0.43 | 2 | 2 | 2 | tier3 | shared           | 1 |
| 8 | 72857393  | 72694839   | C | T | 505 | 0  | 0.00 | 509 | 0   | 0.00 | 416 | 173 | 0.29 | 2 | 2 | 2 | tier3 | relapse-specific | 0 |
| 8 | 76968843  | 76806288   | A | T | 456 | 14 | 0.03 | 251 | 203 | 0.45 | 321 | 204 | 0.39 | 2 | 2 | 2 | tier3 | shared           | 0 |
| 8 | 80648545  | 80485990   | G | A | 236 | 11 | 0.04 | 124 | 95  | 0.43 | 192 | 131 | 0.41 | 2 | 2 | 2 | tier3 | shared           | 0 |
| 8 | 80849786  | 80687231   | G | T | 229 | 3  | 0.01 | 111 | 103 | 0.48 | 229 | 161 | 0.41 | 2 | 2 | 2 | tier3 | shared           | 0 |
| 8 | 82622315  | 82459760   | C | T | 598 | 30 | 0.05 | 364 | 243 | 0.40 | 412 | 276 | 0.40 | 2 | 2 | 2 | tier3 | shared           | 0 |
| 8 | 99365402  | 99296226   | T | C | 662 | 14 | 0.02 | 415 | 382 | 0.48 | 519 | 336 | 0.39 | 2 | 2 | 2 | tier3 | shared           | 0 |
| 9 | 101888917 | 102849096  | C | T | 711 | 13 | 0.02 | 372 | 289 | 0.44 | 506 | 380 | 0.43 | 2 | 2 | 2 | tier3 | shared           | 0 |
| 9 | 110146992 | 1111107171 | C | A | 570 | 0  | 0.00 | 629 | 0   | 0.00 | 582 | 134 | 0.19 | 2 | 2 | 2 | tier3 | relapse-specific | 0 |
| 9 | 118884413 | 119844592  | A | G | 729 | 0  | 0.00 | 847 | 1   | 0.00 | 697 | 224 | 0.24 | 2 | 2 | 2 | tier3 | relapse-specific | 0 |
| 9 | 119179309 | 120139488  | G | C | 416 | 12 | 0.03 | 263 | 257 | 0.49 | 287 | 239 | 0.45 | 2 | 2 | 2 | tier3 | shared           | 0 |
| 9 | 121245312 | 122205491  | C | T | 551 | 20 | 0.04 | 275 | 289 | 0.51 | 406 | 279 | 0.41 | 2 | 2 | 2 | tier3 | shared           | 1 |
| 9 | 126126705 | 127086884  | A | T | 320 | 0  | 0.00 | 366 | 0   | 0.00 | 262 | 72  | 0.22 | 2 | 2 | 2 | tier3 | relapse-specific | 0 |
| 9 | 127538437 | 128498616  | G | C | 482 | 16 | 0.03 | 234 | 211 | 0.47 | 420 | 277 | 0.40 | 2 | 2 | 2 | tier3 | shared           | 0 |
| 9 | 135482492 | 136492671  | G | A | 550 | 20 | 0.04 | 334 | 283 | 0.46 | 400 | 243 | 0.38 | 2 | 2 | 2 | tier3 | shared           | 0 |
| 9 | 136677404 | 137537583  | G | A | 368 | 0  | 0.00 | 478 | 0   | 0.00 | 347 | 125 | 0.26 | 2 | 2 | 2 | tier2 | relapse-specific | 0 |
| 9 | 137642727 | 138502906  | G | A | 340 | 6  | 0.02 | 235 | 141 | 0.38 | 228 | 159 | 0.41 | 2 | 2 | 2 | tier3 | shared           | 0 |
| 9 | 22642860  | 22652860   | G | A | 739 | 22 | 0.03 | 357 | 303 | 0.46 | 524 | 307 | 0.37 | 2 | 2 | 2 | tier2 | shared           | 1 |
| 9 | 23949362  | 23959362   | G | A | 371 | 14 | 0.04 | 189 | 180 | 0.49 | 272 | 183 | 0.40 | 2 | 2 | 2 | tier1 | shared           | 0 |
| 9 | 27203572  | 27213572   | G | A | 437 | 12 | 0.03 | 259 | 186 | 0.42 | 361 | 215 | 0.37 | 2 | 2 | 2 | tier1 | shared           | 1 |
| 9 | 3109415   | 3119415    | C | T | 434 | 9  | 0.02 | 209 | 164 | 0.44 | 273 | 164 | 0.38 | 2 | 2 | 2 | tier3 | shared           | 1 |
| 9 | 34289662  | 34299662   | G | A | 287 | 8  | 0.03 | 278 | 208 | 0.43 | 383 | 244 | 0.39 | 2 | 2 | 2 | tier2 | shared           | 1 |
| 9 | 38249524  | 38259524   | C | T | 356 | 8  | 0.02 | 221 | 188 | 0.46 | 316 | 220 | 0.41 | 2 | 2 | 2 | tier2 | shared           | 1 |
| 9 | 4330530   | 4340530    | T | C | 428 | 12 | 0.03 | 284 | 237 | 0.45 | 320 | 222 | 0.41 | 2 | 2 | 2 | tier3 | shared           | 1 |

|   |           |           |                     |   |     |    |      |     |     |      |     |     |      |   |      |      |       |                  |   |
|---|-----------|-----------|---------------------|---|-----|----|------|-----|-----|------|-----|-----|------|---|------|------|-------|------------------|---|
| 9 | 454456    | 464456    | G                   | A | 393 | 0  | 0.00 | 335 | 0   | 0.00 | 324 | 111 | 0.26 | 2 | 2    | 2    | tier3 | relapse-specific | 1 |
| 9 | 73432413  | 74242593  | G                   | A | 658 | 19 | 0.03 | 334 | 276 | 0.45 | 533 | 329 | 0.38 | 2 | 2    | 2    | tier3 | shared           | 1 |
| 9 | 74779346  | 75589526  | G                   | T | 425 | 19 | 0.04 | 246 | 192 | 0.44 | 359 | 295 | 0.45 | 2 | 2    | 2    | tier3 | shared           | 0 |
| 9 | 79485413  | 80295593  | C                   | T | 564 | 17 | 0.03 | 303 | 253 | 0.46 | 440 | 338 | 0.43 | 2 | 2    | 2    | tier3 | shared           | 0 |
| 9 | 80165699  | 80975879  | C                   | A | 476 | 0  | 0.00 | 528 | 0   | 0.00 | 494 | 141 | 0.22 | 2 | 2    | 2    | tier3 | relapse-specific | 0 |
| 9 | 86458473  | 87268653  | A                   | G | 396 | 13 | 0.03 | 235 | 221 | 0.48 | 358 | 216 | 0.38 | 2 | 2    | 2    | tier3 | shared           | 0 |
| 9 | 86788180  | 87598360  | TGTCTGACTATAAACAAAC | - | 478 | 16 | 0.03 | 242 | 232 | 0.49 | 354 | 222 | 0.39 | 2 | 2    | 2    | tier3 | shared           | 0 |
| 9 | 88744001  | 89554181  | G                   | A | 684 | 19 | 0.03 | 395 | 322 | 0.45 | 506 | 335 | 0.40 | 2 | 2    | 2    | tier3 | shared           | 0 |
| 9 | 8965173   | 8975173   | T                   | C | 368 | 7  | 0.02 | 181 | 149 | 0.45 | 315 | 209 | 0.40 | 2 | 2    | 2    | tier3 | shared           | 1 |
| 9 | 92915429  | 93875608  | C                   | T | 602 | 16 | 0.03 | 329 | 316 | 0.49 | 462 | 323 | 0.41 | 2 | 2    | 2    | tier3 | shared           | 0 |
| X | 104681903 | 104795247 | C                   | T | 193 | 5  | 0.03 | 30  | 120 | 0.80 | 53  | 184 | 0.78 | 2 | 0.97 | 1    | tier3 | shared           | 0 |
| X | 104960175 | 105073519 | T                   | G | 279 | 0  | 0.00 | 247 | 0   | 0.00 | 216 | 124 | 0.36 | 2 | 0.97 | 1    | tier3 | relapse-specific | 1 |
| X | 111343447 | 111456791 | G                   | T | 258 | 0  | 0.00 | 199 | 4   | 0.02 | 119 | 118 | 0.50 | 2 | 0.97 | 1    | tier3 | relapse-specific | 0 |
| X | 111801908 | 111915252 | G                   | A | 279 | 23 | 0.08 | 19  | 220 | 0.92 | 82  | 311 | 0.79 | 2 | 0.97 | 1    | tier3 | shared           | 0 |
| X | 122157809 | 122330128 | C                   | A | 342 | 18 | 0.05 | 30  | 313 | 0.91 | 89  | 299 | 0.77 | 2 | 0.93 | 1.03 | tier3 | shared           | 0 |
| X | 128145196 | 128317515 | A                   | G | 239 | 0  | 0.00 | 231 | 0   | 0.00 | 218 | 126 | 0.37 | 2 | 1.01 | 0.96 | tier3 | relapse-specific | 1 |
| X | 133375658 | 133547992 | G                   | A | 201 | 14 | 0.07 | 13  | 189 | 0.94 | 61  | 223 | 0.79 | 2 | 1.01 | 0.96 | tier1 | shared           | 6 |
| X | 140908119 | 141080453 | T                   | C | 334 | 22 | 0.06 | 21  | 306 | 0.94 | 78  | 345 | 0.82 | 2 | 0.93 | 1.01 | tier3 | shared           | 1 |
| X | 141555307 | 141727641 | G                   | A | 297 | 15 | 0.05 | 16  | 218 | 0.93 | 61  | 237 | 0.80 | 2 | 0.93 | 1.01 | tier3 | shared           | 1 |
| X | 146216741 | 146409049 | G                   | A | 170 | 11 | 0.06 | 6   | 151 | 0.96 | 62  | 207 | 0.77 | 2 | 0.97 | 1.02 | tier3 | shared           | 0 |
| X | 2702186   | 2692186   | C                   | T | 612 | 12 | 0.02 | 392 | 302 | 0.44 | 495 | 325 | 0.40 | 2 | 2    | 2    | tier3 | shared           | 0 |
| X | 38008716  | 38123772  | T                   | A | 322 | 29 | 0.08 | 15  | 274 | 0.95 | 70  | 298 | 0.81 | 2 | 1    | 1    | tier3 | shared           | 1 |
| X | 40416092  | 40531148  | T                   | C | 370 | 28 | 0.07 | 19  | 286 | 0.94 | 102 | 323 | 0.76 | 2 | 1    | 1    | tier1 | shared           | 1 |
| X | 57963125  | 57946400  | G                   | T | 240 | 10 | 0.04 | 25  | 226 | 0.90 | 53  | 279 | 0.84 | 2 | 0.95 | 0.99 | tier3 | shared           | 0 |
| X | 78698656  | 78812000  | C                   | T | 261 | 24 | 0.08 | 25  | 315 | 0.93 | 63  | 310 | 0.83 | 2 | 0.92 | 1.03 | tier3 | shared           | 1 |
| X | 93658417  | 93771761  | T                   | G | 199 | 0  | 0.00 | 209 | 0   | 0.00 | 136 | 121 | 0.47 | 2 | 0.91 | 0.96 | tier3 | relapse-specific | 1 |
| Y | 14043637  | 15534243  | A                   | G | 330 | 21 | 0.06 | 10  | 242 | 0.96 | 70  | 321 | 0.82 | 2 | 2    | 2    | tier2 | shared           | 0 |
| Y | 16113990  | 17604596  | T                   | C | 216 | 16 | 0.07 | 11  | 190 | 0.95 | 77  | 255 | 0.77 | 2 | 2    | 2    | tier3 | shared           | 0 |
| Y | 20078640  | 21619252  | C                   | A | 352 | 27 | 0.07 | 36  | 282 | 0.89 | 61  | 308 | 0.83 | 2 | 2    | 2    | tier3 | shared           | 0 |
| Y | 7721445   | 7661445   | C                   | G | 219 | 0  | 0.00 | 206 | 1   | 0.00 | 122 | 96  | 0.44 | 2 | 2    | 2    | tier3 | relapse-specific | 0 |



**Supplementary Table 6g.** Somatic point mutations and indels from UPN 869586 tumor-relapse pair used for mutation spectrum and clonality analyses. Mutations identified in the relapse sample with <2% allele frequencies in the primary tumor were classified as relapse-specific.

| Chr | Start (NCBI 36) | Start (GRCh37) | Ref | Var | NormalRefReads | NormalVarReads | NormalVarFreq | TumorRefReads | TumorVarReads | TumorVarFreq | RelapseRefReads | RelapseVarReads | RelapseVarFreq | NormalCN | TumorCN | RelapseCN | Tier  | Classification | # of samples recurrent (out of 200) |
|-----|-----------------|----------------|-----|-----|----------------|----------------|---------------|---------------|---------------|--------------|-----------------|-----------------|----------------|----------|---------|-----------|-------|----------------|-------------------------------------|
| 1   | 100625419       | 100852831      | T   | A   | 441            | 3              | 0.01          | 219           | 142           | 0.39         | 308             | 71              | 0.19           | 2        | 2       | 2         | tier3 | shared         | 1                                   |
| 1   | 101021626       | 101249038      | A   | G   | 786            | 12             | 0.02          | 288           | 271           | 0.48         | 637             | 175             | 0.22           | 2        | 2       | 2         | tier3 | shared         | 1                                   |
| 1   | 104258517       | 104456994      | G   | A   | 602            | 11             | 0.02          | 168           | 152           | 0.48         | 269             | 103             | 0.28           | 2        | 2       | 2         | tier3 | shared         | 0                                   |
| 1   | 105515812       | 105714289      | G   | A   | 884            | 8              | 0.01          | 363           | 308           | 0.46         | 668             | 157             | 0.19           | 2        | 2       | 2         | tier3 | shared         | 1                                   |
| 1   | 106131808       | 106330285      | C   | T   | 598            | 9              | 0.01          | 212           | 131           | 0.38         | 340             | 75              | 0.18           | 2        | 2       | 2         | tier2 | shared         | 1                                   |
| 1   | 106715566       | 106914043      | C   | T   | 483            | 1              | 0.00          | 167           | 126           | 0.43         | 390             | 86              | 0.18           | 2        | 2       | 2         | tier2 | shared         | 1                                   |
| 1   | 108308251       | 108506728      | A   | G   | 344            | 3              | 0.01          | 183           | 135           | 0.42         | 239             | 48              | 0.17           | 2        | 2       | 2         | tier2 | shared         | 1                                   |
| 1   | 108373360       | 108571837      | G   | A   | 685            | 11             | 0.02          | 353           | 267           | 0.43         | 369             | 103             | 0.22           | 2        | 2       | 2         | tier3 | shared         | 1                                   |
| 1   | 109572363       | 109770840      | G   | C   | 497            | 3              | 0.01          | 198           | 76            | 0.28         | 493             | 0               | 0.00           | 2        | 2       | 2         | tier3 | tumor-specific | 1                                   |
| 1   | 110820433       | 111018910      | -   | AC  | 504            | 2              | 0.00          | 320           | 117           | 0.27         | 374             | 0               | 0.00           | 2        | 2       | 2         | tier3 | tumor-specific | 0                                   |
| 1   | 11747101        | 11824514       | G   | A   | 476            | 8              | 0.02          | 260           | 246           | 0.49         | 319             | 75              | 0.19           | 2        | 2       | 2         | tier3 | shared         | 1                                   |
| 1   | 117611163       | 117809640      | C   | T   | 807            | 11             | 0.01          | 467           | 386           | 0.45         | 541             | 123             | 0.19           | 2        | 2       | 2         | tier2 | shared         | 0                                   |
| 1   | 118567276       | 118765753      | C   | A   | 854            | 12             | 0.01          | 337           | 275           | 0.45         | 626             | 134             | 0.18           | 2        | 2       | 2         | tier3 | shared         | 0                                   |
| 1   | 12339316        | 12416729       | T   | C   | 460            | 5              | 0.01          | 211           | 178           | 0.46         | 333             | 87              | 0.21           | 2        | 2       | 2         | tier3 | shared         | 1                                   |
| 1   | 14105605        | 14233018       | C   | T   | 515            | 5              | 0.01          | 235           | 236           | 0.50         | 340             | 90              | 0.21           | 2        | 2       | 2         | tier3 | shared         | 0                                   |
| 1   | 14341255        | 14468668       | G   | A   | 531            | 8              | 0.01          | 258           | 211           | 0.45         | 418             | 92              | 0.18           | 2        | 2       | 2         | tier3 | shared         | 0                                   |
| 1   | 148144145       | 149877521      | G   | A   | 673            | 9              | 0.01          | 367           | 279           | 0.43         | 428             | 123             | 0.22           | 2        | 2       | 2         | tier1 | shared         | 1                                   |
| 1   | 148398368       | 150131744      | -   | G   | 344            | 5              | 0.01          | 229           | 152           | 0.40         | 230             | 59              | 0.20           | 2        | 2       | 2         | tier3 | shared         | 0                                   |
| 1   | 150571282       | 152304658      | A   | C   | 739            | 14             | 0.02          | 314           | 300           | 0.49         | 509             | 137             | 0.21           | 2        | 2       | 2         | tier2 | shared         | 0                                   |
| 1   | 15456527        | 15583940       | G   | A   | 764            | 8              | 0.01          | 378           | 297           | 0.44         | 422             | 97              | 0.19           | 2        | 2       | 2         | tier3 | shared         | 0                                   |
| 1   | 155813811       | 157547187      | A   | T   | 620            | 9              | 0.01          | 255           | 173           | 0.40         | 398             | 91              | 0.19           | 2        | 2       | 2         | tier3 | shared         | 0                                   |
| 1   | 157408286       | 159141662      | G   | A   | 139            | 3              | 0.02          | 69            | 51            | 0.43         | 92              | 34              | 0.27           | 2        | 2       | 2         | tier2 | shared         | 1                                   |
| 1   | 159331196       | 161064572      | G   | T   | 628            | 2              | 0.00          | 422           | 89            | 0.17         | 364             | 96              | 0.21           | 2        | 2       | 2         | tier3 | shared         | 0                                   |
| 1   | 160240958       | 161974334      | -   | A   | 376            | 8              | 0.02          | 244           | 183           | 0.43         | 308             | 73              | 0.19           | 2        | 2       | 2         | tier3 | shared         | 0                                   |
| 1   | 161173886       | 162907262      | G   | A   | 728            | 8              | 0.01          | 335           | 259           | 0.44         | 534             | 109             | 0.17           | 2        | 2       | 2         | tier3 | shared         | 0                                   |
| 1   | 168739155       | 170472531      | C   | T   | 847            | 8              | 0.01          | 413           | 322           | 0.44         | 606             | 149             | 0.20           | 2        | 2       | 2         | tier2 | shared         | 0                                   |
| 1   | 169564687       | 171298063      | -   | A   | 771            | 16             | 0.02          | 342           | 226           | 0.40         | 500             | 111             | 0.18           | 2        | 2       | 2         | tier3 | shared         | 0                                   |
| 1   | 17558566        | 17685979       | G   | T   | 372            | 6              | 0.02          | 207           | 180           | 0.47         | 250             | 69              | 0.22           | 2        | 2       | 2         | tier3 | shared         | 0                                   |
| 1   | 175674904       | 177408281      | T   | A   | 1090           | 9              | 0.01          | 492           | 405           | 0.45         | 707             | 200             | 0.22           | 2        | 2       | 2         | tier2 | shared         | 0                                   |

|   |           |           |   |   |      |    |      |     |     |      |     |     |      |   |   |   |       |        |   |
|---|-----------|-----------|---|---|------|----|------|-----|-----|------|-----|-----|------|---|---|---|-------|--------|---|
| 1 | 176375491 | 178108868 | G | A | 279  | 4  | 0.01 | 84  | 61  | 0.42 | 188 | 44  | 0.19 | 2 | 2 | 2 | tier3 | shared | 0 |
| 1 | 177650817 | 179384194 | C | T | 561  | 7  | 0.01 | 160 | 153 | 0.49 | 282 | 86  | 0.23 | 2 | 2 | 2 | tier3 | shared | 0 |
| 1 | 17822004  | 17949417  | C | T | 474  | 6  | 0.01 | 198 | 180 | 0.48 | 291 | 80  | 0.22 | 2 | 2 | 2 | tier3 | shared | 2 |
| 1 | 181488479 | 183221856 | C | T | 354  | 2  | 0.01 | 221 | 180 | 0.45 | 235 | 51  | 0.18 | 2 | 2 | 2 | tier1 | shared | 1 |
| 1 | 188037336 | 189770713 | A | G | 524  | 7  | 0.01 | 168 | 135 | 0.45 | 410 | 124 | 0.23 | 2 | 2 | 2 | tier2 | shared | 1 |
| 1 | 188581276 | 190314653 | C | A | 261  | 1  | 0.00 | 52  | 16  | 0.24 | 176 | 42  | 0.19 | 2 | 2 | 2 | tier2 | shared | 5 |
| 1 | 189330554 | 191063931 | C | T | 813  | 15 | 0.02 | 279 | 281 | 0.50 | 536 | 127 | 0.19 | 2 | 2 | 2 | tier3 | shared | 1 |
| 1 | 191933988 | 193667365 | C | T | 823  | 6  | 0.01 | 374 | 278 | 0.43 | 572 | 141 | 0.20 | 2 | 2 | 2 | tier3 | shared | 0 |
| 1 | 192800989 | 194534366 | G | A | 609  | 3  | 0.00 | 221 | 176 | 0.44 | 416 | 98  | 0.19 | 2 | 2 | 2 | tier3 | shared | 1 |
| 1 | 194464035 | 196197412 | C | T | 610  | 8  | 0.01 | 255 | 220 | 0.46 | 518 | 128 | 0.20 | 2 | 2 | 2 | tier1 | shared | 1 |
| 1 | 194688957 | 196422334 | C | T | 668  | 8  | 0.01 | 300 | 257 | 0.46 | 408 | 105 | 0.20 | 2 | 2 | 2 | tier3 | shared | 1 |
| 1 | 195270064 | 197003441 | G | A | 437  | 9  | 0.02 | 124 | 109 | 0.47 | 285 | 73  | 0.20 | 2 | 2 | 2 | tier3 | shared | 0 |
| 1 | 199884746 | 201618123 | C | T | 790  | 13 | 0.02 | 347 | 265 | 0.43 | 480 | 134 | 0.22 | 2 | 2 | 2 | tier1 | shared | 2 |
| 1 | 20178272  | 20305685  | C | T | 567  | 10 | 0.02 | 377 | 357 | 0.49 | 456 | 131 | 0.22 | 2 | 2 | 2 | tier3 | shared | 0 |
| 1 | 208906360 | 210839737 | G | A | 463  | 7  | 0.01 | 256 | 252 | 0.50 | 437 | 102 | 0.19 | 2 | 2 | 2 | tier3 | shared | 0 |
| 1 | 209213244 | 211146621 | C | T | 789  | 9  | 0.01 | 327 | 281 | 0.46 | 557 | 129 | 0.19 | 2 | 2 | 2 | tier3 | shared | 0 |
| 1 | 210726833 | 212660210 | C | T | 387  | 6  | 0.02 | 211 | 160 | 0.43 | 256 | 61  | 0.19 | 2 | 2 | 2 | tier2 | shared | 0 |
| 1 | 213434125 | 215367502 | C | T | 470  | 9  | 0.02 | 166 | 96  | 0.37 | 303 | 62  | 0.17 | 2 | 2 | 2 | tier3 | shared | 0 |
| 1 | 214374854 | 216308231 | G | A | 849  | 6  | 0.01 | 349 | 303 | 0.46 | 604 | 133 | 0.18 | 2 | 2 | 2 | tier3 | shared | 2 |
| 1 | 214889105 | 216822482 | C | T | 624  | 5  | 0.01 | 222 | 190 | 0.46 | 395 | 97  | 0.20 | 2 | 2 | 2 | tier3 | shared | 0 |
| 1 | 215154767 | 217088144 | C | A | 850  | 15 | 0.02 | 400 | 332 | 0.45 | 556 | 139 | 0.20 | 2 | 2 | 2 | tier2 | shared | 0 |
| 1 | 215841463 | 217774840 | C | T | 769  | 11 | 0.01 | 301 | 261 | 0.46 | 534 | 128 | 0.19 | 2 | 2 | 2 | tier3 | shared | 0 |
| 1 | 216163968 | 218097345 | G | A | 439  | 8  | 0.02 | 214 | 185 | 0.46 | 412 | 110 | 0.21 | 2 | 2 | 2 | tier3 | shared | 1 |
| 1 | 216304035 | 218237412 | G | A | 736  | 11 | 0.01 | 373 | 365 | 0.49 | 575 | 146 | 0.20 | 2 | 2 | 2 | tier2 | shared | 1 |
| 1 | 217256405 | 219189782 | T | C | 289  | 1  | 0.00 | 79  | 67  | 0.46 | 255 | 55  | 0.18 | 2 | 2 | 2 | tier3 | shared | 1 |
| 1 | 221173612 | 223106989 | G | T | 335  | 2  | 0.01 | 189 | 34  | 0.15 | 306 | 68  | 0.18 | 2 | 2 | 2 | tier3 | shared | 1 |
| 1 | 221677366 | 223610743 | - | T | 461  | 8  | 0.02 | 251 | 140 | 0.36 | 366 | 72  | 0.16 | 2 | 2 | 2 | tier3 | shared | 0 |
| 1 | 221705623 | 223639000 | C | T | 696  | 5  | 0.01 | 320 | 264 | 0.45 | 491 | 132 | 0.21 | 2 | 2 | 2 | tier3 | shared | 1 |
| 1 | 225627629 | 227561006 | C | T | 596  | 6  | 0.01 | 366 | 246 | 0.40 | 465 | 92  | 0.17 | 2 | 2 | 2 | tier3 | shared | 0 |
| 1 | 229081409 | 231014786 | C | A | 914  | 7  | 0.01 | 372 | 285 | 0.43 | 649 | 171 | 0.21 | 2 | 2 | 2 | tier3 | shared | 0 |
| 1 | 229494826 | 231428203 | G | A | 587  | 15 | 0.02 | 359 | 296 | 0.45 | 485 | 121 | 0.20 | 2 | 2 | 2 | tier3 | shared | 0 |
| 1 | 22962664  | 23090077  | G | A | 490  | 8  | 0.02 | 238 | 203 | 0.46 | 315 | 84  | 0.21 | 2 | 2 | 2 | tier3 | shared | 0 |
| 1 | 230362104 | 232295481 | C | A | 696  | 11 | 0.02 | 365 | 302 | 0.45 | 449 | 105 | 0.19 | 2 | 2 | 2 | tier2 | shared | 1 |
| 1 | 23051601  | 23179014  | C | T | 299  | 2  | 0.01 | 111 | 83  | 0.43 | 204 | 34  | 0.14 | 2 | 2 | 2 | tier2 | shared | 0 |
| 1 | 231744754 | 233678131 | A | G | 765  | 6  | 0.01 | 313 | 275 | 0.47 | 471 | 126 | 0.21 | 2 | 2 | 2 | tier3 | shared | 1 |
| 1 | 233105368 | 235038745 | C | A | 1025 | 13 | 0.01 | 447 | 319 | 0.42 | 647 | 146 | 0.18 | 2 | 2 | 2 | tier3 | shared | 0 |
| 1 | 236205132 | 238138509 | A | G | 1076 | 11 | 0.01 | 445 | 371 | 0.45 | 786 | 197 | 0.20 | 2 | 2 | 2 | tier2 | shared | 0 |
| 1 | 236435727 | 238369104 | C | T | 282  | 1  | 0.00 | 70  | 38  | 0.35 | 183 | 32  | 0.15 | 2 | 2 | 2 | tier3 | shared | 1 |
| 1 | 236647090 | 238580467 | C | T | 626  | 4  | 0.01 | 280 | 254 | 0.48 | 470 | 121 | 0.20 | 2 | 2 | 2 | tier2 | shared | 1 |
| 1 | 236849286 | 238782663 | C | T | 770  | 8  | 0.01 | 305 | 269 | 0.47 | 513 | 148 | 0.22 | 2 | 2 | 2 | tier3 | shared | 1 |

|    |           |           |       |   |      |    |      |     |     |      |     |     |      |   |   |   |       |                  |   |
|----|-----------|-----------|-------|---|------|----|------|-----|-----|------|-----|-----|------|---|---|---|-------|------------------|---|
| 1  | 237548643 | 239482020 | G     | A | 980  | 10 | 0.01 | 382 | 243 | 0.39 | 567 | 138 | 0.20 | 2 | 2 | 2 | tier3 | shared           | 1 |
| 1  | 239381660 | 241315037 | C     | A | 925  | 11 | 0.01 | 369 | 254 | 0.41 | 475 | 101 | 0.18 | 2 | 2 | 2 | tier2 | shared           | 0 |
| 1  | 25222394  | 25349807  | T     | C | 614  | 13 | 0.02 | 258 | 268 | 0.51 | 461 | 93  | 0.17 | 2 | 2 | 2 | tier3 | shared           | 1 |
| 1  | 30047873  | 30275286  | G     | A | 356  | 8  | 0.02 | 169 | 127 | 0.43 | 247 | 69  | 0.22 | 2 | 2 | 2 | tier2 | shared           | 1 |
| 1  | 3022471   | 3032611   | C     | T | 236  | 2  | 0.01 | 160 | 137 | 0.46 | 183 | 54  | 0.23 | 2 | 2 | 2 | tier3 | shared           | 1 |
| 1  | 30588269  | 30815682  | G     | A | 106  | 0  | 0.00 | 106 | 26  | 0.20 | 109 | 0   | 0.00 | 2 | 2 | 2 | tier3 | tumor-specific   | 0 |
| 1  | 34170985  | 34398398  | C     | T | 672  | 3  | 0.00 | 275 | 209 | 0.43 | 408 | 118 | 0.22 | 2 | 2 | 2 | tier3 | shared           | 0 |
| 1  | 34646377  | 34873790  | G     | A | 758  | 10 | 0.01 | 327 | 276 | 0.46 | 485 | 113 | 0.19 | 2 | 2 | 2 | tier3 | shared           | 1 |
| 1  | 34803824  | 35031237  | C     | A | 517  | 4  | 0.01 | 237 | 221 | 0.48 | 335 | 85  | 0.20 | 2 | 2 | 2 | tier3 | shared           | 1 |
| 1  | 35138238  | 35365651  | G     | A | 453  | 10 | 0.02 | 263 | 231 | 0.47 | 344 | 99  | 0.22 | 2 | 2 | 2 | tier3 | shared           | 1 |
| 1  | 36853337  | 37080750  | G     | A | 817  | 12 | 0.01 | 368 | 288 | 0.44 | 398 | 106 | 0.21 | 2 | 2 | 2 | tier3 | shared           | 0 |
| 1  | 45149811  | 45377224  | T     | C | 941  | 11 | 0.01 | 418 | 414 | 0.50 | 552 | 174 | 0.24 | 2 | 2 | 2 | tier3 | shared           | 0 |
| 1  | 45858196  | 46085609  | C     | T | 634  | 12 | 0.02 | 310 | 256 | 0.45 | 437 | 103 | 0.19 | 2 | 2 | 2 | tier3 | shared           | 0 |
| 1  | 58484050  | 58711462  | C     | T | 516  | 1  | 0.00 | 198 | 114 | 0.37 | 354 | 82  | 0.19 | 2 | 2 | 2 | tier3 | shared           | 0 |
| 1  | 61049431  | 61276843  | G     | A | 767  | 9  | 0.01 | 272 | 225 | 0.45 | 503 | 101 | 0.17 | 2 | 2 | 2 | tier3 | shared           | 1 |
| 1  | 64277040  | 64504452  | C     | T | 668  | 6  | 0.01 | 233 | 226 | 0.49 | 456 | 122 | 0.21 | 2 | 2 | 2 | tier3 | shared           | 0 |
| 1  | 73704484  | 73931896  | -     | A | 661  | 9  | 0.01 | 255 | 182 | 0.42 | 409 | 84  | 0.17 | 2 | 2 | 2 | tier3 | shared           | 1 |
| 1  | 75051626  | 75279038  | C     | T | 686  | 4  | 0.01 | 312 | 273 | 0.47 | 533 | 114 | 0.18 | 2 | 2 | 2 | tier3 | shared           | 0 |
| 1  | 75400544  | 75627956  | G     | A | 382  | 6  | 0.02 | 129 | 127 | 0.50 | 273 | 60  | 0.18 | 2 | 2 | 2 | tier3 | shared           | 0 |
| 1  | 79586157  | 79813569  | A     | T | 639  | 0  | 0.00 | 419 | 0   | 0.00 | 409 | 89  | 0.18 | 2 | 2 | 2 | tier3 | relapse-specific | 1 |
| 1  | 80505153  | 80732565  | A     | T | 731  | 17 | 0.02 | 291 | 261 | 0.47 | 521 | 141 | 0.21 | 2 | 2 | 2 | tier2 | shared           | 0 |
| 1  | 80743777  | 80971189  | C     | T | 452  | 2  | 0.00 | 233 | 41  | 0.15 | 298 | 82  | 0.22 | 2 | 2 | 2 | tier3 | shared           | 0 |
| 1  | 80882926  | 81110338  | C     | T | 621  | 11 | 0.02 | 181 | 167 | 0.48 | 359 | 79  | 0.18 | 2 | 2 | 2 | tier3 | shared           | 1 |
| 1  | 81481229  | 81708641  | C     | G | 665  | 2  | 0.00 | 202 | 165 | 0.45 | 407 | 111 | 0.21 | 2 | 2 | 2 | tier2 | shared           | 0 |
| 1  | 82154481  | 82381893  | C     | T | 886  | 10 | 0.01 | 247 | 262 | 0.51 | 482 | 129 | 0.21 | 2 | 2 | 2 | tier3 | shared           | 1 |
| 1  | 82513492  | 82740904  | G     | A | 762  | 8  | 0.01 | 492 | 86  | 0.15 | 500 | 122 | 0.20 | 2 | 2 | 2 | tier3 | shared           | 1 |
| 1  | 82979893  | 83207305  | G     | C | 760  | 10 | 0.01 | 282 | 235 | 0.45 | 475 | 124 | 0.21 | 2 | 2 | 2 | tier2 | shared           | 1 |
| 1  | 85563599  | 85791011  | A     | G | 950  | 7  | 0.01 | 298 | 247 | 0.45 | 452 | 107 | 0.19 | 2 | 2 | 2 | tier2 | shared           | 0 |
| 1  | 87704659  | 87932071  | G     | T | 394  | 4  | 0.01 | 124 | 83  | 0.40 | 247 | 72  | 0.23 | 2 | 2 | 2 | tier2 | shared           | 0 |
| 1  | 88418025  | 88645437  | G     | A | 336  | 2  | 0.01 | 115 | 82  | 0.42 | 279 | 82  | 0.23 | 2 | 2 | 2 | tier2 | shared           | 1 |
| 1  | 89889861  | 90117273  | A     | G | 618  | 12 | 0.02 | 186 | 151 | 0.45 | 406 | 100 | 0.20 | 2 | 2 | 2 | tier3 | shared           | 0 |
| 1  | 89910422  | 90137834  | C     | T | 1062 | 13 | 0.01 | 510 | 378 | 0.43 | 671 | 165 | 0.20 | 2 | 2 | 2 | tier2 | shared           | 0 |
| 1  | 90007390  | 90234802  | G     | A | 486  | 4  | 0.01 | 290 | 247 | 0.46 | 396 | 83  | 0.17 | 2 | 2 | 2 | tier3 | shared           | 0 |
| 1  | 95852418  | 96079830  | -     | T | 654  | 12 | 0.02 | 351 | 286 | 0.45 | 429 | 79  | 0.16 | 2 | 2 | 2 | tier3 | shared           | 1 |
| 1  | 96796746  | 97024158  | C     | T | 762  | 9  | 0.01 | 341 | 285 | 0.46 | 503 | 129 | 0.20 | 2 | 2 | 2 | tier3 | shared           | 0 |
| 1  | 98866988  | 99094400  | CTTAT | - | 399  | 2  | 0.00 | 147 | 115 | 0.44 | 332 | 82  | 0.20 | 2 | 2 | 2 | tier3 | shared           | 0 |
| 1  | 99260217  | 99487629  | T     | A | 575  | 8  | 0.01 | 181 | 149 | 0.45 | 429 | 85  | 0.17 | 2 | 2 | 2 | tier2 | shared           | 0 |
| 10 | 100068933 | 100078943 | G     | A | 858  | 7  | 0.01 | 286 | 248 | 0.46 | 506 | 124 | 0.20 | 2 | 2 | 2 | tier2 | shared           | 1 |
| 10 | 101213454 | 101223464 | C     | G | 888  | 18 | 0.02 | 466 | 395 | 0.46 | 649 | 162 | 0.20 | 2 | 2 | 2 | tier2 | shared           | 0 |
| 10 | 10282897  | 10242891  | G     | A | 844  | 18 | 0.02 | 390 | 369 | 0.49 | 574 | 143 | 0.20 | 2 | 2 | 2 | tier3 | shared           | 0 |

|    |           |           |   |       |      |    |      |     |     |      |     |     |      |   |   |   |       |                |   |
|----|-----------|-----------|---|-------|------|----|------|-----|-----|------|-----|-----|------|---|---|---|-------|----------------|---|
| 10 | 10628016  | 10588010  | C | T     | 737  | 12 | 0.02 | 250 | 240 | 0.49 | 390 | 108 | 0.22 | 2 | 2 | 2 | tier2 | shared         | 1 |
| 10 | 106595367 | 106605377 | C | T     | 615  | 12 | 0.02 | 342 | 237 | 0.41 | 471 | 120 | 0.20 | 2 | 2 | 2 | tier3 | shared         | 1 |
| 10 | 106743384 | 106753394 | C | A     | 585  | 11 | 0.02 | 288 | 188 | 0.39 | 484 | 120 | 0.20 | 2 | 2 | 2 | tier2 | shared         | 1 |
| 10 | 107281839 | 107291849 | C | T     | 355  | 4  | 0.01 | 114 | 101 | 0.47 | 291 | 61  | 0.17 | 2 | 2 | 2 | tier3 | shared         | 0 |
| 10 | 108352378 | 108362388 | A | G     | 462  | 5  | 0.01 | 269 | 231 | 0.46 | 346 | 111 | 0.24 | 2 | 2 | 2 | tier3 | shared         | 0 |
| 10 | 110925002 | 110935012 | T | G     | 814  | 8  | 0.01 | 300 | 302 | 0.50 | 490 | 111 | 0.18 | 2 | 2 | 2 | tier3 | shared         | 1 |
| 10 | 11104505  | 11064499  | - | T     | 482  | 25 | 0.05 | 225 | 116 | 0.34 | 365 | 68  | 0.16 | 2 | 2 | 2 | tier3 | shared         | 0 |
| 10 | 111110033 | 111120043 | C | G     | 972  | 7  | 0.01 | 351 | 261 | 0.43 | 600 | 173 | 0.22 | 2 | 2 | 2 | tier3 | shared         | 1 |
| 10 | 111441529 | 111451539 | G | C     | 806  | 9  | 0.01 | 311 | 219 | 0.41 | 545 | 137 | 0.20 | 2 | 2 | 2 | tier3 | shared         | 1 |
| 10 | 117428688 | 117438698 | C | T     | 678  | 8  | 0.01 | 289 | 238 | 0.45 | 448 | 109 | 0.20 | 2 | 2 | 2 | tier3 | shared         | 2 |
| 10 | 117570150 | 117580160 | G | A     | 755  | 2  | 0.00 | 352 | 228 | 0.39 | 405 | 81  | 0.17 | 2 | 2 | 2 | tier3 | shared         | 2 |
| 10 | 117845864 | 117855874 | G | A     | 587  | 3  | 0.01 | 209 | 211 | 0.50 | 388 | 92  | 0.19 | 2 | 2 | 2 | tier3 | shared         | 0 |
| 10 | 118139345 | 118149355 | C | T     | 620  | 9  | 0.01 | 261 | 209 | 0.44 | 446 | 122 | 0.21 | 2 | 2 | 2 | tier3 | shared         | 0 |
| 10 | 118726162 | 118736172 | C | T     | 692  | 14 | 0.02 | 321 | 260 | 0.45 | 544 | 138 | 0.20 | 2 | 2 | 2 | tier3 | shared         | 0 |
| 10 | 123174487 | 123184497 | C | T     | 716  | 6  | 0.01 | 294 | 276 | 0.48 | 394 | 94  | 0.19 | 2 | 2 | 2 | tier3 | shared         | 0 |
| 10 | 124082289 | 124092299 | T | A     | 518  | 6  | 0.01 | 233 | 195 | 0.46 | 343 | 89  | 0.21 | 2 | 2 | 2 | tier3 | shared         | 1 |
| 10 | 124794442 | 124804452 | T | C     | 648  | 5  | 0.01 | 151 | 153 | 0.50 | 431 | 110 | 0.20 | 2 | 2 | 2 | tier3 | shared         | 0 |
| 10 | 127227746 | 127237756 | G | A     | 999  | 6  | 0.01 | 537 | 166 | 0.24 | 749 | 0   | 0.00 | 2 | 2 | 2 | tier3 | tumor-specific | 1 |
| 10 | 128134394 | 128144404 | T | C     | 869  | 11 | 0.01 | 466 | 405 | 0.46 | 645 | 143 | 0.18 | 2 | 2 | 2 | tier3 | shared         | 0 |
| 10 | 130088113 | 130198123 | C | T     | 616  | 21 | 0.03 | 305 | 275 | 0.47 | 425 | 105 | 0.20 | 2 | 2 | 2 | tier3 | shared         | 1 |
| 10 | 130656603 | 130766613 | C | T     | 753  | 5  | 0.01 | 302 | 251 | 0.45 | 484 | 140 | 0.22 | 2 | 2 | 2 | tier3 | shared         | 1 |
| 10 | 131103876 | 131213886 | G | T     | 632  | 14 | 0.02 | 369 | 267 | 0.42 | 394 | 123 | 0.24 | 2 | 2 | 2 | tier3 | shared         | 1 |
| 10 | 132353514 | 132463524 | C | T     | 765  | 8  | 0.01 | 353 | 303 | 0.46 | 475 | 103 | 0.18 | 2 | 2 | 2 | tier3 | shared         | 1 |
| 10 | 133849918 | 133999928 | C | T     | 140  | 3  | 0.02 | 94  | 26  | 0.22 | 111 | 28  | 0.20 | 2 | 2 | 2 | tier2 | shared         | 0 |
| 10 | 134588664 | 134738674 | C | T     | 313  | 3  | 0.01 | 206 | 175 | 0.46 | 230 | 58  | 0.20 | 2 | 2 | 2 | tier2 | shared         | 0 |
| 10 | 13681763  | 13641757  | C | A     | 527  | 7  | 0.01 | 176 | 172 | 0.49 | 323 | 78  | 0.19 | 2 | 2 | 2 | tier3 | shared         | 0 |
| 10 | 16956314  | 16916308  | C | T     | 678  | 13 | 0.02 | 297 | 244 | 0.45 | 469 | 121 | 0.21 | 2 | 2 | 2 | tier3 | shared         | 1 |
| 10 | 1709805   | 1719805   | A | G     | 550  | 4  | 0.01 | 299 | 218 | 0.42 | 384 | 94  | 0.20 | 2 | 2 | 2 | tier3 | shared         | 0 |
| 10 | 19757104  | 19717098  | G | A     | 461  | 8  | 0.02 | 235 | 236 | 0.50 | 396 | 100 | 0.20 | 2 | 2 | 2 | tier3 | shared         | 1 |
| 10 | 2534120   | 2544120   | C | T     | 797  | 13 | 0.02 | 488 | 260 | 0.35 | 640 | 110 | 0.15 | 2 | 2 | 2 | tier1 | shared         | 1 |
| 10 | 28556997  | 28516991  | G | A     | 954  | 15 | 0.02 | 302 | 250 | 0.45 | 590 | 156 | 0.21 | 2 | 2 | 2 | tier3 | shared         | 0 |
| 10 | 28864676  | 28824670  | - | AGGGC | 902  | 14 | 0.02 | 308 | 289 | 0.48 | 551 | 110 | 0.17 | 2 | 2 | 2 | tier1 | shared         | 2 |
| 10 | 29201770  | 29161764  | G | A     | 891  | 9  | 0.01 | 317 | 273 | 0.46 | 478 | 129 | 0.21 | 2 | 2 | 2 | tier3 | shared         | 0 |
| 10 | 31062092  | 31022086  | C | A     | 805  | 8  | 0.01 | 299 | 210 | 0.41 | 521 | 124 | 0.19 | 2 | 2 | 2 | tier3 | shared         | 1 |
| 10 | 36958360  | 36918354  | C | T     | 301  | 5  | 0.02 | 79  | 68  | 0.46 | 201 | 55  | 0.21 | 2 | 2 | 2 | tier3 | shared         | 0 |
| 10 | 37691513  | 37651507  | C | T     | 585  | 11 | 0.02 | 172 | 166 | 0.49 | 496 | 144 | 0.23 | 2 | 2 | 2 | tier2 | shared         | 0 |
| 10 | 37762773  | 37722767  | G | T     | 1001 | 8  | 0.01 | 346 | 265 | 0.43 | 622 | 161 | 0.21 | 2 | 2 | 2 | tier3 | shared         | 1 |
| 10 | 42523772  | 43203766  | G | A     | 815  | 5  | 0.01 | 296 | 253 | 0.46 | 436 | 128 | 0.23 | 2 | 2 | 2 | tier3 | shared         | 0 |
| 10 | 4423632   | 4433632   | C | T     | 832  | 10 | 0.01 | 349 | 307 | 0.47 | 518 | 141 | 0.21 | 2 | 2 | 2 | tier3 | shared         | 0 |
| 10 | 45403334  | 46083328  | G | T     | 348  | 1  | 0.00 | 136 | 58  | 0.30 | 256 | 50  | 0.16 | 2 | 2 | 2 | tier3 | shared         | 0 |

|    |           |           |   |          |      |    |      |     |     |      |     |     |      |   |   |   |       |        |   |
|----|-----------|-----------|---|----------|------|----|------|-----|-----|------|-----|-----|------|---|---|---|-------|--------|---|
| 10 | 50307838  | 50637832  | C | T        | 994  | 11 | 0.01 | 366 | 328 | 0.47 | 546 | 145 | 0.21 | 2 | 2 | 2 | tier3 | shared | 0 |
| 10 | 53476687  | 53806681  | C | A        | 794  | 11 | 0.01 | 320 | 272 | 0.46 | 538 | 132 | 0.20 | 2 | 2 | 2 | tier3 | shared | 0 |
| 10 | 53491665  | 53821659  | G | A        | 558  | 3  | 0.01 | 262 | 202 | 0.44 | 473 | 128 | 0.21 | 2 | 2 | 2 | tier3 | shared | 0 |
| 10 | 57607320  | 57937314  | C | T        | 631  | 12 | 0.02 | 129 | 125 | 0.49 | 406 | 126 | 0.24 | 2 | 2 | 2 | tier3 | shared | 1 |
| 10 | 60867451  | 61197445  | C | T        | 596  | 11 | 0.02 | 198 | 189 | 0.49 | 518 | 146 | 0.22 | 2 | 2 | 2 | tier3 | shared | 1 |
| 10 | 61596587  | 61926581  | C | A        | 1153 | 16 | 0.01 | 429 | 337 | 0.44 | 648 | 115 | 0.15 | 2 | 2 | 2 | tier1 | shared | 1 |
| 10 | 617405    | 627405    | T | A        | 334  | 4  | 0.01 | 130 | 92  | 0.41 | 290 | 73  | 0.20 | 2 | 2 | 2 | tier3 | shared | 2 |
| 10 | 62932225  | 63262219  | A | T        | 731  | 14 | 0.02 | 251 | 217 | 0.46 | 527 | 121 | 0.19 | 2 | 2 | 2 | tier3 | shared | 0 |
| 10 | 65471530  | 65801524  | C | T        | 212  | 5  | 0.02 | 108 | 85  | 0.44 | 128 | 25  | 0.16 | 2 | 2 | 2 | tier3 | shared | 1 |
| 10 | 67606097  | 67936091  | T | C        | 587  | 11 | 0.02 | 238 | 180 | 0.43 | 442 | 100 | 0.18 | 2 | 2 | 2 | tier3 | shared | 1 |
| 10 | 67745103  | 68075097  | G | C        | 848  | 9  | 0.01 | 318 | 284 | 0.47 | 554 | 133 | 0.19 | 2 | 2 | 2 | tier3 | shared | 1 |
| 10 | 67807862  | 68137856  | T | A        | 696  | 7  | 0.01 | 333 | 245 | 0.42 | 537 | 126 | 0.19 | 2 | 2 | 2 | tier2 | shared | 1 |
| 10 | 67828365  | 68158359  | G | A        | 825  | 12 | 0.01 | 377 | 341 | 0.47 | 555 | 139 | 0.20 | 2 | 2 | 2 | tier2 | shared | 1 |
| 10 | 68901253  | 69231247  | G | A        | 527  | 5  | 0.01 | 265 | 191 | 0.42 | 451 | 126 | 0.22 | 2 | 2 | 2 | tier3 | shared | 1 |
| 10 | 70029424  | 70359418  | C | T        | 516  | 13 | 0.02 | 278 | 226 | 0.45 | 344 | 84  | 0.20 | 2 | 2 | 2 | tier2 | shared | 2 |
| 10 | 72583478  | 72913472  | C | T        | 700  | 4  | 0.01 | 501 | 101 | 0.17 | 385 | 80  | 0.17 | 2 | 2 | 2 | tier3 | shared | 1 |
| 10 | 73509568  | 73839562  | G | C        | 485  | 8  | 0.02 | 283 | 261 | 0.48 | 317 | 105 | 0.25 | 2 | 2 | 2 | tier3 | shared | 0 |
| 10 | 80716685  | 81046679  | - | AACTTCTC | 293  | 5  | 0.02 | 159 | 97  | 0.38 | 215 | 36  | 0.14 | 2 | 2 | 2 | tier3 | shared | 0 |
| 10 | 83782638  | 83792658  | G | A        | 558  | 3  | 0.01 | 192 | 146 | 0.43 | 356 | 104 | 0.23 | 2 | 2 | 2 | tier3 | shared | 1 |
| 10 | 83995484  | 84005504  | A | T        | 694  | 6  | 0.01 | 254 | 176 | 0.41 | 496 | 113 | 0.19 | 2 | 2 | 2 | tier3 | shared | 1 |
| 10 | 84453471  | 84463491  | G | T        | 680  | 14 | 0.02 | 266 | 198 | 0.43 | 459 | 94  | 0.17 | 2 | 2 | 2 | tier3 | shared | 1 |
| 10 | 85411540  | 85421560  | C | T        | 769  | 11 | 0.01 | 410 | 373 | 0.48 | 566 | 168 | 0.23 | 2 | 2 | 2 | tier3 | shared | 0 |
| 10 | 8640977   | 8600971   | C | T        | 648  | 10 | 0.02 | 325 | 296 | 0.48 | 464 | 142 | 0.23 | 2 | 2 | 2 | tier3 | shared | 0 |
| 10 | 94405496  | 94415516  | G | A        | 943  | 12 | 0.01 | 387 | 259 | 0.40 | 554 | 158 | 0.22 | 2 | 2 | 2 | tier2 | shared | 0 |
| 10 | 94794402  | 94804422  | C | T        | 581  | 9  | 0.02 | 216 | 205 | 0.49 | 354 | 85  | 0.19 | 2 | 2 | 2 | tier3 | shared | 0 |
| 11 | 100391923 | 100886713 | A | -        | 358  | 17 | 0.05 | 134 | 81  | 0.38 | 217 | 68  | 0.24 | 2 | 2 | 2 | tier3 | shared | 0 |
| 11 | 101246636 | 101741426 | C | T        | 1201 | 15 | 0.01 | 580 | 501 | 0.46 | 846 | 223 | 0.21 | 2 | 2 | 2 | tier3 | shared | 0 |
| 11 | 102592234 | 103087024 | - | T        | 507  | 5  | 0.01 | 109 | 101 | 0.48 | 277 | 62  | 0.18 | 2 | 2 | 2 | tier2 | shared | 2 |
| 11 | 104447886 | 104942676 | G | A        | 579  | 8  | 0.01 | 218 | 153 | 0.41 | 369 | 84  | 0.19 | 2 | 2 | 2 | tier3 | shared | 0 |
| 11 | 106005732 | 106500522 | A | -        | 812  | 21 | 0.03 | 362 | 264 | 0.42 | 512 | 136 | 0.21 | 2 | 2 | 2 | tier3 | shared | 1 |
| 11 | 106972356 | 107467146 | C | A        | 403  | 2  | 0.00 | 132 | 105 | 0.44 | 209 | 52  | 0.20 | 2 | 2 | 2 | tier3 | shared | 1 |
| 11 | 112644644 | 113139434 | - | A        | 888  | 7  | 0.01 | 464 | 359 | 0.44 | 580 | 129 | 0.18 | 2 | 2 | 2 | tier3 | shared | 0 |
| 11 | 112982090 | 113476880 | - | CCTCCCCC | 579  | 2  | 0.00 | 291 | 127 | 0.30 | 554 | 69  | 0.11 | 2 | 2 | 2 | tier2 | shared | 0 |
| 11 | 115844209 | 116338999 | G | A        | 927  | 11 | 0.01 | 429 | 356 | 0.45 | 526 | 152 | 0.22 | 2 | 2 | 2 | tier2 | shared | 1 |
| 11 | 119952559 | 120447349 | G | A        | 566  | 8  | 0.01 | 382 | 339 | 0.47 | 468 | 101 | 0.18 | 2 | 2 | 2 | tier3 | shared | 1 |
| 11 | 120711603 | 121206393 | G | A        | 325  | 10 | 0.03 | 142 | 164 | 0.54 | 260 | 66  | 0.20 | 2 | 2 | 2 | tier3 | shared | 0 |
| 11 | 121250028 | 121744818 | C | A        | 532  | 5  | 0.01 | 314 | 207 | 0.40 | 434 | 107 | 0.20 | 2 | 2 | 2 | tier3 | shared | 1 |
| 11 | 124577189 | 125071979 | C | T        | 336  | 6  | 0.02 | 155 | 119 | 0.43 | 273 | 67  | 0.20 | 2 | 2 | 2 | tier2 | shared | 0 |
| 11 | 126161018 | 126655808 | T | C        | 491  | 7  | 0.01 | 194 | 160 | 0.45 | 345 | 98  | 0.22 | 2 | 2 | 2 | tier3 | shared | 0 |
| 11 | 129099192 | 129593982 | C | T        | 398  | 4  | 0.01 | 195 | 168 | 0.46 | 304 | 78  | 0.20 | 2 | 2 | 2 | tier3 | shared | 0 |

|    |           |           |      |       |      |    |      |     |     |      |     |     |      |   |      |   |       |                |    |
|----|-----------|-----------|------|-------|------|----|------|-----|-----|------|-----|-----|------|---|------|---|-------|----------------|----|
| 11 | 131087426 | 131582216 | G    | A     | 713  | 13 | 0.02 | 282 | 220 | 0.44 | 465 | 125 | 0.21 | 2 | 2    | 2 | tier3 | shared         | 0  |
| 11 | 132525633 | 133020423 | G    | A     | 673  | 13 | 0.02 | 312 | 273 | 0.47 | 421 | 114 | 0.21 | 2 | 2    | 2 | tier3 | shared         | 0  |
| 11 | 13818946  | 13862370  | C    | A     | 1053 | 6  | 0.01 | 636 | 181 | 0.22 | 705 | 0   | 0.00 | 2 | 2    | 2 | tier3 | tumor-specific | 0  |
| 11 | 13921326  | 13964750  | G    | T     | 479  | 2  | 0.00 | 363 | 88  | 0.20 | 334 | 71  | 0.18 | 2 | 2    | 2 | tier3 | shared         | 1  |
| 11 | 16766228  | 16809652  | G    | T     | 679  | 10 | 0.01 | 292 | 204 | 0.41 | 410 | 95  | 0.19 | 2 | 2    | 2 | tier2 | shared         | 0  |
| 11 | 2093070   | 2136494   | C    | T     | 304  | 4  | 0.01 | 135 | 125 | 0.48 | 186 | 48  | 0.21 | 2 | 2    | 2 | tier3 | shared         | 0  |
| 11 | 21157398  | 21200822  | C    | T     | 626  | 8  | 0.01 | 214 | 173 | 0.45 | 505 | 101 | 0.17 | 2 | 2    | 2 | tier3 | shared         | 1  |
| 11 | 21441779  | 21485203  | C    | T     | 1004 | 13 | 0.01 | 366 | 353 | 0.49 | 657 | 172 | 0.21 | 2 | 2    | 2 | tier3 | shared         | 1  |
| 11 | 23084461  | 23127885  | C    | T     | 891  | 5  | 0.01 | 423 | 126 | 0.23 | 736 | 0   | 0.00 | 2 | 2    | 2 | tier3 | tumor-specific | 1  |
| 11 | 23252161  | 23295585  | C    | T     | 953  | 7  | 0.01 | 374 | 273 | 0.42 | 582 | 139 | 0.19 | 2 | 2    | 2 | tier3 | shared         | 1  |
| 11 | 23414375  | 23457799  | A    | T     | 311  | 8  | 0.03 | 74  | 77  | 0.51 | 189 | 43  | 0.19 | 2 | 2    | 2 | tier3 | shared         | 1  |
| 11 | 26176637  | 26220061  | C    | T     | 565  | 8  | 0.01 | 225 | 207 | 0.48 | 462 | 100 | 0.18 | 2 | 2    | 2 | tier3 | shared         | 1  |
| 11 | 26600393  | 26643817  | A    | T     | 900  | 11 | 0.01 | 371 | 301 | 0.45 | 595 | 176 | 0.23 | 2 | 2    | 2 | tier3 | shared         | 1  |
| 11 | 28141801  | 28185225  | T    | C     | 435  | 6  | 0.01 | 123 | 137 | 0.53 | 368 | 104 | 0.22 | 2 | 2    | 2 | tier2 | shared         | 0  |
| 11 | 29608177  | 29651601  | G    | A     | 504  | 11 | 0.02 | 219 | 182 | 0.45 | 364 | 84  | 0.19 | 2 | 2    | 2 | tier3 | shared         | 1  |
| 11 | 32374485  | 32417909  | -    | GACCG | 474  | 2  | 0.00 | 284 | 198 | 0.41 | 300 | 66  | 0.18 | 2 | 2    | 2 | tier1 | shared         | 12 |
| 11 | 32813764  | 32857188  | C    | T     | 456  | 2  | 0.00 | 178 | 149 | 0.46 | 425 | 108 | 0.20 | 2 | 2    | 2 | tier2 | shared         | 0  |
| 11 | 35617793  | 35661217  | G    | A     | 368  | 11 | 0.03 | 230 | 159 | 0.41 | 255 | 81  | 0.24 | 2 | 2    | 2 | tier3 | shared         | 0  |
| 11 | 36130208  | 36173632  | G    | A     | 653  | 4  | 0.01 | 304 | 262 | 0.46 | 398 | 90  | 0.18 | 2 | 2    | 2 | tier3 | shared         | 1  |
| 11 | 37199515  | 37242939  | G    | A     | 412  | 11 | 0.03 | 148 | 122 | 0.45 | 325 | 91  | 0.22 | 2 | 2    | 2 | tier3 | shared         | 1  |
| 11 | 39886096  | 39929520  | G    | T     | 659  | 6  | 0.01 | 258 | 233 | 0.47 | 453 | 98  | 0.18 | 2 | 2    | 2 | tier3 | shared         | 0  |
| 11 | 40250680  | 40294104  | G    | A     | 291  | 6  | 0.02 | 116 | 110 | 0.49 | 246 | 52  | 0.17 | 2 | 2    | 2 | tier3 | shared         | 0  |
| 11 | 40618057  | 40661481  | T    | -     | 562  | 29 | 0.05 | 260 | 184 | 0.41 | 431 | 118 | 0.21 | 2 | 2    | 2 | tier3 | shared         | 1  |
| 11 | 40678606  | 40722030  | A    | C     | 643  | 13 | 0.02 | 199 | 199 | 0.50 | 402 | 110 | 0.21 | 2 | 2    | 2 | tier3 | shared         | 1  |
| 11 | 42231838  | 42275262  | A    | -     | 778  | 12 | 0.02 | 336 | 241 | 0.42 | 392 | 112 | 0.22 | 2 | 2    | 2 | tier1 | shared         | 0  |
| 11 | 4697163   | 4740587   | C    | T     | 615  | 6  | 0.01 | 371 | 254 | 0.41 | 430 | 119 | 0.22 | 2 | 2    | 2 | tier2 | shared         | 0  |
| 11 | 49764785  | 49808209  | A    | -     | 722  | 18 | 0.02 | 206 | 165 | 0.44 | 415 | 96  | 0.19 | 2 | 1.36 | 2 | tier3 | shared         | 0  |
| 11 | 67233955  | 67477379  | G    | A     | 540  | 5  | 0.01 | 324 | 249 | 0.43 | 372 | 81  | 0.18 | 2 | 2    | 2 | tier3 | shared         | 4  |
| 11 | 68820412  | 69063836  | C    | A     | 365  | 9  | 0.02 | 180 | 156 | 0.46 | 230 | 76  | 0.25 | 2 | 2    | 2 | tier1 | shared         | 1  |
| 11 | 69511014  | 69833366  | C    | A     | 515  | 8  | 0.02 | 246 | 239 | 0.49 | 301 | 79  | 0.21 | 2 | 2    | 2 | tier3 | shared         | 0  |
| 11 | 70110549  | 70432901  | G    | A     | 268  | 2  | 0.01 | 146 | 144 | 0.50 | 202 | 64  | 0.24 | 2 | 2    | 2 | tier3 | shared         | 0  |
| 11 | 70240166  | 70562518  | G    | A     | 423  | 4  | 0.01 | 186 | 187 | 0.50 | 338 | 88  | 0.21 | 2 | 2    | 2 | tier3 | shared         | 0  |
| 11 | 70313659  | 70636011  | C    | A     | 733  | 4  | 0.01 | 345 | 287 | 0.45 | 379 | 109 | 0.22 | 2 | 2    | 2 | tier3 | shared         | 0  |
| 11 | 70339479  | 70661831  | G    | A     | 269  | 4  | 0.01 | 163 | 166 | 0.50 | 184 | 44  | 0.19 | 2 | 2    | 2 | tier3 | shared         | 0  |
| 11 | 71333212  | 71655564  | -    | G     | 680  | 4  | 0.01 | 303 | 213 | 0.41 | 468 | 109 | 0.19 | 2 | 2    | 2 | tier3 | shared         | 0  |
| 11 | 71402098  | 71724450  | -    | CCCC  | 264  | 3  | 0.01 | 120 | 69  | 0.37 | 142 | 40  | 0.22 | 2 | 2    | 2 | tier1 | shared         | 1  |
| 11 | 7231970   | 7275394   | G    | A     | 681  | 12 | 0.02 | 551 | 101 | 0.15 | 467 | 113 | 0.19 | 2 | 2    | 2 | tier3 | shared         | 0  |
| 11 | 7401800   | 7445224   | AGAG | -     | 419  | 4  | 0.01 | 176 | 181 | 0.51 | 237 | 60  | 0.20 | 2 | 2    | 2 | tier3 | shared         | 0  |
| 11 | 74692358  | 75014710  | G    | A     | 634  | 7  | 0.01 | 441 | 136 | 0.24 | 510 | 0   | 0.00 | 2 | 2    | 2 | tier3 | tumor-specific | 1  |
| 11 | 78335902  | 78658254  | C    | T     | 657  | 1  | 0.00 | 377 | 75  | 0.17 | 372 | 78  | 0.17 | 2 | 2    | 2 | tier2 | shared         | 1  |

|    |           |           |     |   |      |    |      |     |     |      |     |     |      |   |   |   |       |                |   |
|----|-----------|-----------|-----|---|------|----|------|-----|-----|------|-----|-----|------|---|---|---|-------|----------------|---|
| 11 | 78591069  | 78913421  | T   | - | 871  | 17 | 0.02 | 400 | 306 | 0.43 | 530 | 148 | 0.22 | 2 | 2 | 2 | tier3 | shared         | 1 |
| 11 | 79669683  | 79992035  | G   | A | 916  | 7  | 0.01 | 369 | 252 | 0.41 | 494 | 104 | 0.17 | 2 | 2 | 2 | tier3 | shared         | 1 |
| 11 | 84033038  | 84355390  | T   | C | 753  | 4  | 0.01 | 329 | 259 | 0.44 | 561 | 109 | 0.16 | 2 | 2 | 2 | tier3 | shared         | 0 |
| 11 | 85646239  | 85968591  | T   | A | 520  | 11 | 0.02 | 193 | 168 | 0.47 | 322 | 82  | 0.20 | 2 | 2 | 2 | tier1 | shared         | 2 |
| 11 | 88599343  | 88959695  | C   | G | 684  | 8  | 0.01 | 284 | 239 | 0.46 | 481 | 126 | 0.21 | 2 | 2 | 2 | tier3 | shared         | 0 |
| 11 | 90927540  | 91287892  | -   | T | 358  | 11 | 0.03 | 142 | 98  | 0.41 | 258 | 62  | 0.19 | 2 | 2 | 2 | tier3 | shared         | 1 |
| 11 | 91626533  | 91986885  | C   | T | 483  | 10 | 0.02 | 217 | 164 | 0.43 | 369 | 100 | 0.21 | 2 | 2 | 2 | tier3 | shared         | 1 |
| 11 | 91797028  | 92157380  | C   | T | 525  | 8  | 0.02 | 165 | 128 | 0.44 | 358 | 66  | 0.16 | 2 | 2 | 2 | tier3 | shared         | 1 |
| 11 | 93002621  | 93362973  | G   | A | 1002 | 17 | 0.02 | 465 | 385 | 0.45 | 665 | 209 | 0.24 | 2 | 2 | 2 | tier3 | shared         | 0 |
| 11 | 96998106  | 97492896  | A   | G | 988  | 19 | 0.02 | 419 | 337 | 0.45 | 616 | 177 | 0.22 | 2 | 2 | 2 | tier3 | shared         | 0 |
| 11 | 97690656  | 98185446  | T   | A | 641  | 10 | 0.02 | 256 | 219 | 0.46 | 405 | 89  | 0.18 | 2 | 2 | 2 | tier2 | shared         | 1 |
| 11 | 99590148  | 100084938 | TTC | - | 154  | 2  | 0.01 | 52  | 14  | 0.21 | 134 | 20  | 0.13 | 2 | 2 | 2 | tier3 | shared         | 2 |
| 12 | 105050145 | 106526015 | C   | T | 718  | 7  | 0.01 | 320 | 290 | 0.48 | 480 | 117 | 0.20 | 2 | 2 | 2 | tier3 | shared         | 0 |
| 12 | 108709819 | 110225436 | C   | T | 499  | 8  | 0.02 | 282 | 179 | 0.39 | 320 | 63  | 0.16 | 2 | 2 | 2 | tier3 | shared         | 0 |
| 12 | 111596853 | 113112470 | G   | T | 684  | 10 | 0.01 | 313 | 264 | 0.46 | 497 | 119 | 0.19 | 2 | 2 | 2 | tier3 | shared         | 0 |
| 12 | 113491503 | 115007120 | G   | T | 613  | 6  | 0.01 | 265 | 92  | 0.26 | 409 | 0   | 0.00 | 2 | 2 | 2 | tier3 | tumor-specific | 0 |
| 12 | 11600664  | 11709397  | C   | T | 915  | 3  | 0.00 | 524 | 144 | 0.22 | 681 | 1   | 0.00 | 2 | 2 | 2 | tier3 | tumor-specific | 0 |
| 12 | 116484385 | 118000002 | T   | C | 587  | 3  | 0.01 | 287 | 98  | 0.25 | 362 | 0   | 0.00 | 2 | 2 | 2 | tier3 | tumor-specific | 1 |
| 12 | 124448371 | 125882418 | C   | G | 1166 | 10 | 0.01 | 591 | 369 | 0.38 | 634 | 148 | 0.19 | 2 | 2 | 2 | tier3 | shared         | 0 |
| 12 | 125623798 | 127057845 | G   | A | 624  | 4  | 0.01 | 343 | 312 | 0.48 | 467 | 113 | 0.19 | 2 | 2 | 2 | tier2 | shared         | 0 |
| 12 | 126850425 | 128284472 | C   | T | 1060 | 17 | 0.02 | 384 | 287 | 0.43 | 528 | 117 | 0.18 | 2 | 2 | 2 | tier3 | shared         | 1 |
| 12 | 127808379 | 129242426 | G   | A | 706  | 12 | 0.02 | 281 | 248 | 0.47 | 339 | 80  | 0.19 | 2 | 2 | 2 | tier3 | shared         | 0 |
| 12 | 128619257 | 130053304 | C   | G | 684  | 5  | 0.01 | 241 | 222 | 0.48 | 376 | 109 | 0.22 | 2 | 2 | 2 | tier3 | shared         | 0 |
| 12 | 128705131 | 130139178 | C   | T | 697  | 6  | 0.01 | 228 | 215 | 0.49 | 401 | 98  | 0.20 | 2 | 2 | 2 | tier3 | shared         | 0 |
| 12 | 130170627 | 131604674 | C   | T | 439  | 9  | 0.02 | 197 | 183 | 0.48 | 262 | 61  | 0.19 | 2 | 2 | 2 | tier3 | shared         | 0 |
| 12 | 13575457  | 13684190  | G   | A | 553  | 11 | 0.02 | 247 | 250 | 0.50 | 312 | 74  | 0.19 | 2 | 2 | 2 | tier3 | shared         | 0 |
| 12 | 1540410   | 1670149   | C   | T | 777  | 12 | 0.02 | 378 | 347 | 0.48 | 441 | 135 | 0.23 | 2 | 2 | 2 | tier3 | shared         | 1 |
| 12 | 15513839  | 15622572  | C   | T | 1029 | 14 | 0.01 | 393 | 289 | 0.42 | 576 | 155 | 0.21 | 2 | 2 | 2 | tier3 | shared         | 0 |
| 12 | 20925361  | 21034094  | G   | A | 843  | 13 | 0.02 | 298 | 208 | 0.41 | 531 | 134 | 0.20 | 2 | 2 | 2 | tier3 | shared         | 0 |
| 12 | 29479858  | 29588591  | C   | T | 539  | 8  | 0.01 | 236 | 185 | 0.44 | 381 | 82  | 0.18 | 2 | 2 | 2 | tier3 | shared         | 0 |
| 12 | 31412249  | 31520982  | C   | T | 547  | 6  | 0.01 | 124 | 86  | 0.41 | 372 | 80  | 0.18 | 2 | 2 | 2 | tier3 | shared         | 0 |
| 12 | 31524470  | 31633203  | A   | - | 619  | 40 | 0.06 | 233 | 182 | 0.44 | 395 | 107 | 0.21 | 2 | 2 | 2 | tier3 | shared         | 1 |
| 12 | 3515374   | 3645113   | C   | T | 628  | 17 | 0.03 | 375 | 305 | 0.45 | 519 | 160 | 0.24 | 2 | 2 | 2 | tier3 | shared         | 0 |
| 12 | 37150181  | 38863914  | C   | T | 821  | 13 | 0.02 | 246 | 203 | 0.45 | 562 | 131 | 0.19 | 2 | 2 | 2 | tier2 | shared         | 1 |
| 12 | 42005661  | 43719394  | G   | A | 751  | 4  | 0.01 | 273 | 210 | 0.43 | 411 | 101 | 0.20 | 2 | 2 | 2 | tier3 | shared         | 0 |
| 12 | 44307912  | 46021645  | G   | A | 607  | 6  | 0.01 | 260 | 204 | 0.44 | 379 | 104 | 0.22 | 2 | 2 | 2 | tier2 | shared         | 1 |
| 12 | 47152645  | 48866378  | C   | T | 490  | 7  | 0.01 | 219 | 169 | 0.44 | 306 | 68  | 0.18 | 2 | 2 | 2 | tier3 | shared         | 0 |
| 12 | 48739047  | 50452780  | C   | G | 463  | 2  | 0.00 | 208 | 161 | 0.44 | 285 | 70  | 0.20 | 2 | 2 | 2 | tier1 | shared         | 1 |
| 12 | 50955381  | 52669114  | T   | C | 627  | 5  | 0.01 | 306 | 261 | 0.46 | 546 | 117 | 0.18 | 2 | 2 | 2 | tier3 | shared         | 0 |
| 12 | 62843551  | 64557284  | G   | T | 725  | 9  | 0.01 | 321 | 255 | 0.44 | 450 | 137 | 0.23 | 2 | 2 | 2 | tier3 | shared         | 0 |

|    |           |           |      |    |      |    |      |     |     |      |     |     |      |   |   |   |       |                  |   |
|----|-----------|-----------|------|----|------|----|------|-----|-----|------|-----|-----|------|---|---|---|-------|------------------|---|
| 12 | 64216620  | 65930353  | C    | T  | 734  | 13 | 0.02 | 325 | 295 | 0.48 | 478 | 120 | 0.20 | 2 | 2 | 2 | tier3 | shared           | 1 |
| 12 | 6448244   | 6577983   | G    | A  | 689  | 24 | 0.03 | 431 | 310 | 0.42 | 510 | 133 | 0.21 | 2 | 2 | 2 | tier2 | shared           | 0 |
| 12 | 73564540  | 75278273  | A    | G  | 425  | 8  | 0.02 | 135 | 150 | 0.53 | 317 | 87  | 0.22 | 2 | 2 | 2 | tier3 | shared           | 1 |
| 12 | 76390199  | 77866068  | C    | A  | 709  | 6  | 0.01 | 204 | 167 | 0.45 | 418 | 129 | 0.24 | 2 | 2 | 2 | tier3 | shared           | 1 |
| 12 | 77981760  | 79457629  | A    | T  | 674  | 2  | 0.00 | 458 | 82  | 0.15 | 512 | 117 | 0.19 | 2 | 2 | 2 | tier3 | shared           | 1 |
| 12 | 80061033  | 81536902  | C    | T  | 533  | 1  | 0.00 | 256 | 230 | 0.47 | 452 | 99  | 0.18 | 2 | 2 | 2 | tier1 | shared           | 2 |
| 12 | 80305084  | 81780953  | A    | C  | 665  | 8  | 0.01 | 238 | 240 | 0.50 | 431 | 107 | 0.20 | 2 | 2 | 2 | tier3 | shared           | 0 |
| 12 | 82431272  | 83907141  | T    | A  | 671  | 7  | 0.01 | 277 | 224 | 0.45 | 430 | 111 | 0.21 | 2 | 2 | 2 | tier3 | shared           | 1 |
| 12 | 82550859  | 84026728  | A    | T  | 853  | 9  | 0.01 | 289 | 248 | 0.46 | 542 | 136 | 0.20 | 2 | 2 | 2 | tier3 | shared           | 1 |
| 12 | 82952593  | 84428462  | A    | G  | 819  | 8  | 0.01 | 268 | 171 | 0.39 | 499 | 147 | 0.23 | 2 | 2 | 2 | tier2 | shared           | 1 |
| 12 | 83466470  | 84942339  | G    | C  | 312  | 7  | 0.02 | 78  | 66  | 0.46 | 198 | 42  | 0.18 | 2 | 2 | 2 | tier3 | shared           | 1 |
| 12 | 84194039  | 85669908  | A    | T  | 219  | 5  | 0.02 | 72  | 52  | 0.42 | 185 | 47  | 0.20 | 2 | 2 | 2 | tier3 | shared           | 0 |
| 12 | 86504514  | 87980383  | C    | T  | 790  | 12 | 0.01 | 250 | 199 | 0.44 | 470 | 135 | 0.22 | 2 | 2 | 2 | tier3 | shared           | 1 |
| 12 | 87116911  | 88592780  | T    | A  | 327  | 1  | 0.00 | 102 | 72  | 0.41 | 242 | 51  | 0.17 | 2 | 2 | 2 | tier3 | shared           | 0 |
| 12 | 88004270  | 89480139  | T    | C  | 841  | 13 | 0.02 | 400 | 303 | 0.43 | 561 | 104 | 0.16 | 2 | 2 | 2 | tier3 | shared           | 1 |
| 12 | 93846488  | 95322357  | T    | C  | 593  | 0  | 0.00 | 739 | 1   | 0.00 | 564 | 137 | 0.20 | 2 | 2 | 2 | tier2 | relapse-specific | 0 |
| 12 | 95073406  | 96549275  | T    | A  | 981  | 10 | 0.01 | 567 | 479 | 0.46 | 673 | 160 | 0.19 | 2 | 2 | 2 | tier3 | shared           | 0 |
| 12 | 96881316  | 98357185  | C    | T  | 283  | 0  | 0.00 | 106 | 90  | 0.46 | 196 | 56  | 0.22 | 2 | 2 | 2 | tier3 | shared           | 1 |
| 12 | 97214456  | 98690325  | C    | A  | 822  | 11 | 0.01 | 379 | 314 | 0.45 | 473 | 127 | 0.21 | 2 | 2 | 2 | tier2 | shared           | 1 |
| 13 | 100115086 | 101317085 | T    | C  | 903  | 13 | 0.01 | 404 | 322 | 0.44 | 480 | 130 | 0.21 | 2 | 2 | 2 | tier2 | shared           | 1 |
| 13 | 101420364 | 102622363 | T    | G  | 1162 | 15 | 0.01 | 392 | 272 | 0.41 | 686 | 165 | 0.19 | 2 | 2 | 2 | tier3 | shared           | 0 |
| 13 | 101449493 | 102651492 | A    | T  | 721  | 5  | 0.01 | 235 | 181 | 0.44 | 516 | 107 | 0.17 | 2 | 2 | 2 | tier3 | shared           | 0 |
| 13 | 102829803 | 104031802 | C    | T  | 632  | 5  | 0.01 | 197 | 168 | 0.46 | 409 | 128 | 0.24 | 2 | 2 | 2 | tier2 | shared           | 1 |
| 13 | 103499293 | 104701292 | TCTT | -  | 531  | 10 | 0.02 | 116 | 82  | 0.41 | 351 | 94  | 0.21 | 2 | 2 | 2 | tier3 | shared           | 1 |
| 13 | 105717434 | 106919433 | C    | T  | 740  | 5  | 0.01 | 435 | 409 | 0.48 | 558 | 161 | 0.22 | 2 | 2 | 2 | tier3 | shared           | 1 |
| 13 | 108073578 | 109275577 | G    | A  | 767  | 13 | 0.02 | 327 | 269 | 0.45 | 597 | 137 | 0.19 | 2 | 2 | 2 | tier3 | shared           | 1 |
| 13 | 111779588 | 112731587 | G    | A  | 589  | 10 | 0.02 | 201 | 135 | 0.40 | 452 | 94  | 0.17 | 2 | 2 | 2 | tier3 | shared           | 0 |
| 13 | 112326383 | 113278382 | C    | T  | 484  | 3  | 0.01 | 281 | 228 | 0.45 | 318 | 65  | 0.17 | 2 | 2 | 2 | tier2 | shared           | 0 |
| 13 | 112390052 | 113342051 | -    | TC | 485  | 3  | 0.01 | 197 | 207 | 0.51 | 348 | 82  | 0.19 | 2 | 2 | 2 | tier3 | shared           | 0 |
| 13 | 113159865 | 114111864 | C    | T  | 796  | 11 | 0.01 | 319 | 224 | 0.41 | 450 | 94  | 0.17 | 2 | 2 | 2 | tier3 | shared           | 0 |
| 13 | 19559062  | 20661062  | G    | A  | 549  | 4  | 0.01 | 174 | 111 | 0.39 | 329 | 85  | 0.21 | 2 | 2 | 2 | tier2 | shared           | 0 |
| 13 | 20228213  | 21330213  | AGTT | -  | 631  | 15 | 0.02 | 223 | 185 | 0.45 | 418 | 105 | 0.20 | 2 | 2 | 2 | tier3 | shared           | 0 |
| 13 | 20365587  | 21467587  | C    | T  | 834  | 8  | 0.01 | 339 | 281 | 0.45 | 555 | 152 | 0.21 | 2 | 2 | 2 | tier3 | shared           | 0 |
| 13 | 24633630  | 25735630  | C    | A  | 643  | 13 | 0.02 | 209 | 229 | 0.52 | 336 | 87  | 0.21 | 2 | 2 | 2 | tier3 | shared           | 0 |
| 13 | 32444064  | 33546064  | G    | A  | 709  | 12 | 0.02 | 269 | 214 | 0.44 | 509 | 141 | 0.22 | 2 | 2 | 2 | tier3 | shared           | 0 |
| 13 | 33058730  | 34160730  | G    | A  | 581  | 10 | 0.02 | 265 | 196 | 0.43 | 359 | 92  | 0.20 | 2 | 2 | 2 | tier3 | shared           | 1 |
| 13 | 35194627  | 36296627  | C    | A  | 779  | 10 | 0.01 | 386 | 315 | 0.45 | 497 | 111 | 0.18 | 2 | 2 | 2 | tier2 | shared           | 0 |
| 13 | 35844364  | 36946364  | C    | T  | 700  | 13 | 0.02 | 348 | 285 | 0.45 | 424 | 97  | 0.19 | 2 | 2 | 2 | tier3 | shared           | 0 |
| 13 | 36262314  | 37364314  | G    | T  | 757  | 8  | 0.01 | 330 | 293 | 0.47 | 492 | 150 | 0.23 | 2 | 2 | 2 | tier3 | shared           | 0 |
| 13 | 36637852  | 37739852  | C    | T  | 741  | 5  | 0.01 | 316 | 243 | 0.43 | 552 | 159 | 0.22 | 2 | 2 | 2 | tier3 | shared           | 0 |



|    |           |           |   |   |     |    |      |     |     |      |     |     |      |   |   |   |       |                  |   |
|----|-----------|-----------|---|---|-----|----|------|-----|-----|------|-----|-----|------|---|---|---|-------|------------------|---|
| 13 | 38218953  | 39320953  | T | A | 608 | 7  | 0.01 | 276 | 232 | 0.46 | 373 | 91  | 0.20 | 2 | 2 | 2 | tier3 | shared           | 3 |
| 13 | 40942534  | 42044534  | C | T | 922 | 12 | 0.01 | 383 | 381 | 0.50 | 565 | 161 | 0.22 | 2 | 2 | 2 | tier3 | shared           | 0 |
| 13 | 41628881  | 42730881  | A | G | 386 | 2  | 0.01 | 63  | 78  | 0.55 | 257 | 63  | 0.20 | 2 | 2 | 2 | tier3 | shared           | 0 |
| 13 | 41643589  | 42745589  | C | T | 852 | 15 | 0.02 | 356 | 300 | 0.46 | 573 | 132 | 0.19 | 2 | 2 | 2 | tier3 | shared           | 0 |
| 13 | 44270505  | 45372505  | C | T | 623 | 8  | 0.01 | 230 | 188 | 0.45 | 450 | 116 | 0.20 | 2 | 2 | 2 | tier3 | shared           | 0 |
| 13 | 48126290  | 49228289  | C | T | 477 | 10 | 0.02 | 161 | 114 | 0.41 | 338 | 68  | 0.17 | 2 | 2 | 2 | tier3 | shared           | 1 |
| 13 | 52837723  | 53939722  | T | - | 223 | 9  | 0.04 | 74  | 44  | 0.37 | 177 | 49  | 0.22 | 2 | 2 | 2 | tier3 | shared           | 0 |
| 13 | 55428867  | 56530866  | A | - | 329 | 5  | 0.01 | 113 | 77  | 0.41 | 175 | 40  | 0.19 | 2 | 2 | 2 | tier3 | shared           | 0 |
| 13 | 55752973  | 56854972  | C | G | 143 | 4  | 0.03 | 23  | 23  | 0.50 | 169 | 27  | 0.14 | 2 | 2 | 2 | tier3 | shared           | 1 |
| 13 | 56434844  | 57536843  | A | T | 688 | 7  | 0.01 | 257 | 229 | 0.47 | 367 | 109 | 0.23 | 2 | 2 | 2 | tier3 | shared           | 1 |
| 13 | 56547920  | 57649919  | T | G | 993 | 5  | 0.01 | 358 | 315 | 0.47 | 716 | 188 | 0.21 | 2 | 2 | 2 | tier2 | shared           | 1 |
| 13 | 57189099  | 58291098  | C | T | 694 | 9  | 0.01 | 366 | 53  | 0.13 | 430 | 114 | 0.21 | 2 | 2 | 2 | tier2 | shared           | 0 |
| 13 | 57300537  | 58402536  | G | A | 675 | 5  | 0.01 | 192 | 155 | 0.45 | 429 | 110 | 0.20 | 2 | 2 | 2 | tier3 | shared           | 1 |
| 13 | 58919452  | 60021451  | A | T | 731 | 3  | 0.00 | 437 | 119 | 0.21 | 688 | 0   | 0.00 | 2 | 2 | 2 | tier2 | tumor-specific   | 1 |
| 13 | 61836083  | 62938082  | C | T | 505 | 4  | 0.01 | 148 | 93  | 0.39 | 315 | 89  | 0.22 | 2 | 2 | 2 | tier3 | shared           | 0 |
| 13 | 61836206  | 62938205  | A | T | 334 | 4  | 0.01 | 76  | 78  | 0.51 | 204 | 49  | 0.19 | 2 | 2 | 2 | tier3 | shared           | 0 |
| 13 | 62067843  | 63169842  | C | T | 88  | 0  | 0.00 | 20  | 18  | 0.47 | 84  | 16  | 0.16 | 2 | 2 | 2 | tier3 | shared           | 1 |
| 13 | 62699194  | 63801193  | C | T | 300 | 5  | 0.02 | 95  | 62  | 0.39 | 194 | 46  | 0.19 | 2 | 2 | 2 | tier3 | shared           | 0 |
| 13 | 64190847  | 65292846  | A | - | 625 | 10 | 0.02 | 279 | 242 | 0.46 | 500 | 136 | 0.21 | 2 | 2 | 2 | tier3 | shared           | 1 |
| 13 | 65537506  | 66639505  | A | G | 479 | 4  | 0.01 | 107 | 111 | 0.51 | 430 | 118 | 0.22 | 2 | 2 | 2 | tier3 | shared           | 1 |
| 13 | 65882790  | 66984789  | G | A | 732 | 7  | 0.01 | 363 | 253 | 0.41 | 566 | 138 | 0.20 | 2 | 2 | 2 | tier3 | shared           | 0 |
| 13 | 66521030  | 67623029  | G | T | 520 | 10 | 0.02 | 245 | 185 | 0.43 | 308 | 103 | 0.25 | 2 | 2 | 2 | tier2 | shared           | 0 |
| 13 | 67217152  | 68319151  | G | T | 561 | 8  | 0.01 | 261 | 212 | 0.45 | 395 | 98  | 0.20 | 2 | 2 | 2 | tier3 | shared           | 1 |
| 13 | 67769515  | 68871514  | C | A | 814 | 4  | 0.00 | 265 | 258 | 0.49 | 447 | 126 | 0.22 | 2 | 2 | 2 | tier2 | shared           | 0 |
| 13 | 68145004  | 69247003  | C | T | 479 | 4  | 0.01 | 121 | 119 | 0.50 | 280 | 70  | 0.20 | 2 | 2 | 2 | tier3 | shared           | 0 |
| 13 | 69993817  | 71095816  | A | T | 557 | 6  | 0.01 | 121 | 168 | 0.58 | 323 | 94  | 0.23 | 2 | 2 | 2 | tier3 | shared           | 1 |
| 13 | 80692580  | 81794579  | G | A | 632 | 13 | 0.02 | 250 | 190 | 0.43 | 421 | 109 | 0.21 | 2 | 2 | 2 | tier2 | shared           | 0 |
| 13 | 81410702  | 82512701  | T | C | 723 | 11 | 0.01 | 308 | 230 | 0.43 | 364 | 115 | 0.24 | 2 | 2 | 2 | tier3 | shared           | 1 |
| 13 | 81853624  | 82955623  | T | A | 718 | 14 | 0.02 | 229 | 183 | 0.44 | 463 | 121 | 0.21 | 2 | 2 | 2 | tier3 | shared           | 1 |
| 13 | 89323401  | 90525400  | C | G | 563 | 11 | 0.02 | 223 | 185 | 0.45 | 363 | 83  | 0.19 | 2 | 2 | 2 | tier2 | shared           | 0 |
| 13 | 89699123  | 90901122  | G | A | 720 | 7  | 0.01 | 350 | 224 | 0.39 | 474 | 117 | 0.20 | 2 | 2 | 2 | tier3 | shared           | 0 |
| 13 | 90202612  | 91404611  | C | A | 759 | 12 | 0.02 | 411 | 288 | 0.41 | 595 | 129 | 0.18 | 2 | 2 | 2 | tier3 | shared           | 0 |
| 13 | 91834507  | 93036506  | C | T | 655 | 1  | 0.00 | 374 | 1   | 0.00 | 363 | 96  | 0.21 | 2 | 2 | 2 | tier2 | relapse-specific | 0 |
| 13 | 92652556  | 93854555  | G | A | 814 | 10 | 0.01 | 377 | 298 | 0.44 | 590 | 139 | 0.19 | 2 | 2 | 2 | tier3 | shared           | 0 |
| 13 | 93181483  | 94383482  | C | A | 794 | 20 | 0.02 | 406 | 295 | 0.42 | 491 | 100 | 0.17 | 2 | 2 | 2 | tier3 | shared           | 0 |
| 13 | 94151983  | 95353982  | C | T | 450 | 7  | 0.02 | 259 | 192 | 0.43 | 320 | 80  | 0.20 | 2 | 2 | 2 | tier3 | shared           | 0 |
| 14 | 101930188 | 102860435 | T | C | 705 | 11 | 0.02 | 356 | 312 | 0.47 | 430 | 115 | 0.21 | 2 | 2 | 2 | tier3 | shared           | 0 |
| 14 | 23103149  | 24033309  | C | T | 928 | 19 | 0.02 | 397 | 347 | 0.47 | 479 | 133 | 0.22 | 2 | 2 | 2 | tier1 | shared           | 1 |
| 14 | 23754911  | 24685071  | A | T | 361 | 2  | 0.01 | 202 | 170 | 0.46 | 243 | 50  | 0.17 | 2 | 2 | 2 | tier2 | shared           | 0 |
| 14 | 24483450  | 25413610  | C | T | 493 | 2  | 0.00 | 183 | 156 | 0.46 | 352 | 68  | 0.16 | 2 | 2 | 2 | tier3 | shared           | 0 |

|    |          |           |   |    |     |    |      |     |     |      |     |     |      |   |   |   |       |                  |   |
|----|----------|-----------|---|----|-----|----|------|-----|-----|------|-----|-----|------|---|---|---|-------|------------------|---|
| 14 | 25426007 | 26356167  | G | T  | 951 | 1  | 0.00 | 615 | 0   | 0.00 | 588 | 61  | 0.09 | 2 | 2 | 2 | tier3 | relapse-specific | 1 |
| 14 | 26041535 | 26971695  | A | T  | 561 | 4  | 0.01 | 176 | 117 | 0.40 | 408 | 84  | 0.17 | 2 | 2 | 2 | tier3 | shared           | 0 |
| 14 | 26444248 | 27374408  | G | A  | 645 | 12 | 0.02 | 226 | 195 | 0.46 | 457 | 113 | 0.20 | 2 | 2 | 2 | tier2 | shared           | 0 |
| 14 | 27399693 | 28329853  | T | C  | 515 | 5  | 0.01 | 189 | 149 | 0.44 | 297 | 83  | 0.22 | 2 | 2 | 2 | tier3 | shared           | 1 |
| 14 | 31466328 | 32396577  | C | T  | 934 | 13 | 0.01 | 310 | 278 | 0.47 | 551 | 149 | 0.21 | 2 | 2 | 2 | tier3 | shared           | 1 |
| 14 | 35171105 | 36101354  | G | T  | 623 | 4  | 0.01 | 168 | 75  | 0.31 | 441 | 76  | 0.15 | 2 | 2 | 2 | tier3 | shared           | 0 |
| 14 | 41798835 | 42729085  | T | -  | 735 | 9  | 0.01 | 282 | 277 | 0.50 | 530 | 118 | 0.18 | 2 | 2 | 2 | tier2 | shared           | 0 |
| 14 | 41858480 | 42788730  | T | A  | 451 | 15 | 0.03 | 118 | 91  | 0.44 | 378 | 57  | 0.13 | 2 | 2 | 2 | tier3 | shared           | 0 |
| 14 | 42164751 | 43095001  | C | A  | 734 | 12 | 0.02 | 278 | 218 | 0.44 | 465 | 142 | 0.23 | 2 | 2 | 2 | tier3 | shared           | 1 |
| 14 | 43834668 | 44764918  | G | C  | 715 | 16 | 0.02 | 406 | 331 | 0.45 | 701 | 163 | 0.19 | 2 | 2 | 2 | tier3 | shared           | 1 |
| 14 | 46259586 | 47189836  | C | T  | 866 | 12 | 0.01 | 444 | 97  | 0.18 | 489 | 111 | 0.19 | 2 | 2 | 2 | tier3 | shared           | 1 |
| 14 | 46505564 | 47435814  | T | G  | 603 | 7  | 0.01 | 173 | 167 | 0.49 | 463 | 96  | 0.17 | 2 | 2 | 2 | tier3 | shared           | 0 |
| 14 | 47724853 | 48655103  | A | T  | 678 | 2  | 0.00 | 170 | 149 | 0.47 | 350 | 87  | 0.20 | 2 | 2 | 2 | tier3 | shared           | 1 |
| 14 | 50821980 | 51752230  | C | A  | 635 | 5  | 0.01 | 309 | 285 | 0.48 | 433 | 111 | 0.20 | 2 | 2 | 2 | tier3 | shared           | 0 |
| 14 | 56040270 | 56970517  | G | A  | 697 | 5  | 0.01 | 385 | 101 | 0.21 | 728 | 1   | 0.00 | 2 | 2 | 2 | tier2 | tumor-specific   | 1 |
| 14 | 56054992 | 56985239  | G | T  | 570 | 12 | 0.02 | 277 | 225 | 0.45 | 336 | 105 | 0.24 | 2 | 2 | 2 | tier3 | shared           | 1 |
| 14 | 56849033 | 57779280  | A | -  | 361 | 10 | 0.03 | 158 | 77  | 0.33 | 307 | 55  | 0.15 | 2 | 2 | 2 | tier3 | shared           | 0 |
| 14 | 56931759 | 57862006  | T | C  | 625 | 6  | 0.01 | 210 | 135 | 0.39 | 426 | 106 | 0.20 | 2 | 2 | 2 | tier3 | shared           | 0 |
| 14 | 57621356 | 58551603  | G | T  | 780 | 8  | 0.01 | 290 | 203 | 0.41 | 448 | 92  | 0.17 | 2 | 2 | 2 | tier3 | shared           | 0 |
| 14 | 58145492 | 59075739  | G | A  | 719 | 11 | 0.02 | 312 | 289 | 0.48 | 567 | 119 | 0.17 | 2 | 2 | 2 | tier2 | shared           | 0 |
| 14 | 60763542 | 61693789  | G | A  | 974 | 17 | 0.02 | 441 | 357 | 0.45 | 723 | 199 | 0.22 | 2 | 2 | 2 | tier3 | shared           | 1 |
| 14 | 61210471 | 62140718  | - | AC | 884 | 7  | 0.01 | 281 | 235 | 0.46 | 554 | 129 | 0.19 | 2 | 2 | 2 | tier3 | shared           | 0 |
| 14 | 61307948 | 62238195  | - | T  | 559 | 5  | 0.01 | 296 | 173 | 0.37 | 436 | 91  | 0.17 | 2 | 2 | 2 | tier3 | shared           | 0 |
| 14 | 62826386 | 63756633  | T | -  | 470 | 19 | 0.04 | 166 | 110 | 0.40 | 355 | 71  | 0.17 | 2 | 2 | 2 | tier3 | shared           | 0 |
| 14 | 64839231 | 65769478  | G | A  | 775 | 12 | 0.02 | 341 | 289 | 0.46 | 397 | 96  | 0.19 | 2 | 2 | 2 | tier2 | shared           | 0 |
| 14 | 66539860 | 67470107  | A | C  | 892 | 4  | 0.00 | 442 | 133 | 0.23 | 665 | 0   | 0.00 | 2 | 2 | 2 | tier3 | tumor-specific   | 0 |
| 14 | 66927867 | 67858114  | C | T  | 242 | 6  | 0.02 | 179 | 200 | 0.53 | 229 | 69  | 0.23 | 2 | 2 | 2 | tier2 | shared           | 0 |
| 14 | 68436121 | 69366368  | C | A  | 764 | 17 | 0.02 | 397 | 405 | 0.50 | 455 | 118 | 0.21 | 2 | 2 | 2 | tier3 | shared           | 0 |
| 14 | 69100487 | 70030734  | C | T  | 711 | 6  | 0.01 | 353 | 288 | 0.45 | 527 | 143 | 0.21 | 2 | 2 | 2 | tier3 | shared           | 0 |
| 14 | 76800837 | 77731084  | G | A  | 509 | 9  | 0.02 | 318 | 232 | 0.42 | 399 | 98  | 0.20 | 2 | 2 | 2 | tier3 | shared           | 0 |
| 14 | 80562772 | 81493019  | A | T  | 714 | 11 | 0.02 | 256 | 245 | 0.49 | 542 | 126 | 0.19 | 2 | 2 | 2 | tier3 | shared           | 0 |
| 14 | 84518986 | 85449233  | A | T  | 758 | 6  | 0.01 | 263 | 265 | 0.50 | 459 | 108 | 0.19 | 2 | 2 | 2 | tier3 | shared           | 1 |
| 14 | 90435550 | 91365797  | T | C  | 825 | 5  | 0.01 | 532 | 155 | 0.23 | 790 | 0   | 0.00 | 2 | 2 | 2 | tier3 | tumor-specific   | 0 |
| 14 | 94117856 | 95048103  | G | A  | 802 | 14 | 0.02 | 371 | 273 | 0.42 | 408 | 102 | 0.20 | 2 | 2 | 2 | tier3 | shared           | 0 |
| 14 | 94135231 | 95065478  | G | A  | 612 | 7  | 0.01 | 313 | 271 | 0.46 | 384 | 96  | 0.20 | 2 | 2 | 2 | tier2 | shared           | 0 |
| 14 | 95469007 | 96399254  | G | A  | 625 | 8  | 0.01 | 286 | 200 | 0.41 | 439 | 101 | 0.19 | 2 | 2 | 2 | tier3 | shared           | 0 |
| 14 | 99829178 | 100759425 | C | T  | 417 | 12 | 0.03 | 215 | 156 | 0.42 | 248 | 71  | 0.22 | 2 | 2 | 2 | tier2 | shared           | 0 |
| 15 | 22289408 | 24738315  | C | T  | 492 | 8  | 0.02 | 247 | 227 | 0.48 | 292 | 64  | 0.18 | 2 | 2 | 2 | tier3 | shared           | 1 |
| 15 | 24601542 | 27050449  | - | T  | 666 | 10 | 0.01 | 255 | 168 | 0.40 | 417 | 86  | 0.17 | 2 | 2 | 2 | tier3 | shared           | 0 |
| 15 | 25745853 | 28072258  | G | A  | 582 | 13 | 0.02 | 290 | 225 | 0.44 | 337 | 90  | 0.21 | 2 | 2 | 2 | tier3 | shared           | 0 |

|    |          |           |     |       |      |     |      |     |     |      |     |     |      |   |      |      |       |        |   |
|----|----------|-----------|-----|-------|------|-----|------|-----|-----|------|-----|-----|------|---|------|------|-------|--------|---|
| 15 | 30165141 | 32377849  | G   | A     | 625  | 5   | 0.01 | 205 | 161 | 0.44 | 421 | 80  | 0.16 | 2 | 2    | 2    | tier3 | shared | 0 |
| 15 | 35204470 | 37417178  | A   | G     | 710  | 18  | 0.02 | 231 | 169 | 0.42 | 393 | 100 | 0.20 | 2 | 2    | 2    | tier2 | shared | 0 |
| 15 | 36231034 | 38443742  | G   | A     | 861  | 7   | 0.01 | 328 | 289 | 0.47 | 504 | 150 | 0.23 | 2 | 2    | 2    | tier3 | shared | 1 |
| 15 | 36318140 | 38530848  | C   | T     | 818  | 12  | 0.01 | 405 | 309 | 0.43 | 600 | 149 | 0.20 | 2 | 2    | 2    | tier3 | shared | 0 |
| 15 | 38135540 | 40348248  | -   | TCGGA | 400  | 7   | 0.02 | 265 | 163 | 0.38 | 314 | 67  | 0.18 | 2 | 2    | 2    | tier3 | shared | 0 |
| 15 | 39384117 | 41596825  | C   | T     | 797  | 4   | 0.00 | 522 | 108 | 0.17 | 557 | 129 | 0.19 | 2 | 2    | 2    | tier3 | shared | 0 |
| 15 | 42095339 | 44308047  | G   | A     | 725  | 14  | 0.02 | 311 | 265 | 0.46 | 496 | 124 | 0.20 | 2 | 2    | 2    | tier3 | shared | 0 |
| 15 | 43790262 | 46002970  | G   | A     | 745  | 16  | 0.02 | 342 | 328 | 0.49 | 506 | 119 | 0.19 | 2 | 2    | 2    | tier3 | shared | 0 |
| 15 | 52741139 | 54953847  | G   | A     | 881  | 6   | 0.01 | 311 | 269 | 0.46 | 597 | 145 | 0.20 | 2 | 2    | 2    | tier3 | shared | 0 |
| 15 | 55623697 | 57836405  | C   | A     | 931  | 7   | 0.01 | 476 | 380 | 0.44 | 671 | 155 | 0.19 | 2 | 2    | 2    | tier3 | shared | 0 |
| 15 | 61187432 | 63400379  | C   | A     | 610  | 9   | 0.01 | 301 | 312 | 0.51 | 432 | 111 | 0.20 | 2 | 2    | 2    | tier3 | shared | 0 |
| 15 | 64063387 | 66276333  | G   | A     | 509  | 7   | 0.01 | 393 | 314 | 0.44 | 440 | 102 | 0.19 | 2 | 2    | 2    | tier3 | shared | 1 |
| 15 | 65829689 | 68042635  | G   | T     | 956  | 20  | 0.02 | 420 | 347 | 0.45 | 734 | 147 | 0.17 | 2 | 2    | 2    | tier3 | shared | 0 |
| 15 | 69291325 | 71504271  | G   | A     | 531  | 5   | 0.01 | 253 | 208 | 0.45 | 395 | 77  | 0.16 | 2 | 2    | 2    | tier3 | shared | 0 |
| 15 | 77461201 | 79674146  | G   | A     | 844  | 17  | 0.02 | 380 | 323 | 0.46 | 557 | 151 | 0.21 | 2 | 2    | 2    | tier3 | shared | 1 |
| 15 | 81157623 | 83360569  | C   | T     | 796  | 13  | 0.02 | 323 | 309 | 0.49 | 462 | 104 | 0.18 | 2 | 2    | 2    | tier2 | shared | 0 |
| 15 | 84614905 | 86813901  | G   | A     | 917  | 19  | 0.02 | 404 | 313 | 0.44 | 621 | 144 | 0.19 | 2 | 2    | 2    | tier3 | shared | 1 |
| 15 | 84729981 | 86928977  | G   | T     | 806  | 12  | 0.01 | 322 | 285 | 0.47 | 448 | 110 | 0.20 | 2 | 2    | 2    | tier3 | shared | 1 |
| 15 | 85034844 | 87233840  | C   | G     | 656  | 2   | 0.00 | 259 | 196 | 0.43 | 352 | 92  | 0.21 | 2 | 2    | 2    | tier3 | shared | 1 |
| 15 | 85796054 | 87995050  | C   | T     | 835  | 2   | 0.00 | 313 | 254 | 0.45 | 510 | 112 | 0.18 | 2 | 2    | 2    | tier3 | shared | 0 |
| 15 | 91229444 | 93428440  | A   | C     | 394  | 3   | 0.01 | 115 | 118 | 0.51 | 283 | 81  | 0.22 | 2 | 2    | 2    | tier3 | shared | 0 |
| 15 | 93352910 | 95551906  | -   | T     | 1026 | 9   | 0.01 | 348 | 277 | 0.44 | 515 | 124 | 0.19 | 2 | 2    | 2    | tier3 | shared | 1 |
| 15 | 93668521 | 95867517  | G   | A     | 624  | 4   | 0.01 | 281 | 199 | 0.41 | 484 | 113 | 0.19 | 2 | 2    | 2    | tier2 | shared | 0 |
| 15 | 94242177 | 96441173  | C   | T     | 997  | 10  | 0.01 | 403 | 367 | 0.48 | 581 | 144 | 0.20 | 2 | 2    | 2    | tier3 | shared | 1 |
| 15 | 95463316 | 97662312  | A   | G     | 677  | 9   | 0.01 | 357 | 260 | 0.42 | 500 | 119 | 0.19 | 2 | 2    | 2    | tier3 | shared | 0 |
| 15 | 95607153 | 97806149  | C   | T     | 876  | 11  | 0.01 | 296 | 275 | 0.48 | 487 | 149 | 0.23 | 2 | 2    | 2    | tier3 | shared | 1 |
| 15 | 97094563 | 99277040  | C   | T     | 530  | 11  | 0.02 | 281 | 239 | 0.46 | 458 | 106 | 0.19 | 2 | 2    | 2    | tier2 | shared | 0 |
| 15 | 98695666 | 100878143 | C   | A     | 1059 | 4   | 0.00 | 406 | 338 | 0.45 | 647 | 163 | 0.20 | 2 | 2    | 2    | tier3 | shared | 1 |
| 16 | 10162241 | 10254740  | C   | T     | 644  | 19  | 0.03 | 41  | 466 | 0.92 | 318 | 211 | 0.40 | 2 | 2    | 2    | tier3 | shared | 0 |
| 16 | 1056286  | 1116285   | T   | A     | 141  | 5   | 0.03 | 22  | 182 | 0.89 | 89  | 75  | 0.46 | 2 | 1.28 | 1.34 | tier2 | shared | 0 |
| 16 | 13958122 | 14050621  | TAG | -     | 150  | 149 | 0.50 | 286 | 12  | 0.04 | 187 | 83  | 0.31 | 2 | 2    | 2    | tier3 | shared | 0 |
| 16 | 25864554 | 25957053  | C   | T     | 883  | 27  | 0.03 | 72  | 642 | 0.90 | 430 | 289 | 0.40 | 2 | 2    | 2    | tier3 | shared | 0 |
| 16 | 27978208 | 28070707  | C   | T     | 181  | 2   | 0.01 | 34  | 167 | 0.83 | 97  | 55  | 0.36 | 2 | 2    | 2    | tier3 | shared | 0 |
| 16 | 34278798 | 34421297  | C   | G     | 746  | 6   | 0.01 | 258 | 196 | 0.43 | 336 | 96  | 0.22 | 2 | 2    | 2    | tier3 | shared | 0 |
| 16 | 34581303 | 34723802  | C   | A     | 1486 | 9   | 0.01 | 723 | 230 | 0.24 | 816 | 92  | 0.10 | 2 | 3.92 | 3.86 | tier1 | shared | 0 |
| 16 | 34841397 | 34983896  | T   | G     | 454  | 4   | 0.01 | 182 | 153 | 0.46 | 251 | 54  | 0.18 | 2 | 2    | 2    | tier3 | shared | 0 |
| 16 | 4275072  | 4335071   | T   | C     | 756  | 26  | 0.03 | 73  | 675 | 0.90 | 284 | 184 | 0.39 | 2 | 2    | 2    | tier3 | shared | 0 |
| 16 | 51059044 | 52501543  | G   | T     | 768  | 5   | 0.01 | 248 | 220 | 0.47 | 430 | 114 | 0.21 | 2 | 2    | 2    | tier3 | shared | 1 |
| 16 | 51123481 | 52565980  | C   | T     | 674  | 8   | 0.01 | 288 | 225 | 0.44 | 394 | 124 | 0.24 | 2 | 2    | 2    | tier3 | shared | 1 |
| 16 | 52994187 | 54436686  | G   | A     | 761  | 5   | 0.01 | 562 | 136 | 0.19 | 508 | 138 | 0.21 | 2 | 2    | 2    | tier3 | shared | 1 |

|    |          |          |   |   |      |    |      |     |     |      |     |     |      |   |      |      |       |                  |   |
|----|----------|----------|---|---|------|----|------|-----|-----|------|-----|-----|------|---|------|------|-------|------------------|---|
| 16 | 53962618 | 55405117 | G | A | 337  | 7  | 0.02 | 150 | 123 | 0.45 | 207 | 68  | 0.25 | 2 | 2    | 2    | tier3 | shared           | 0 |
| 16 | 57529049 | 58971548 | G | A | 729  | 11 | 0.01 | 325 | 263 | 0.45 | 534 | 118 | 0.18 | 2 | 2    | 2    | tier3 | shared           | 1 |
| 16 | 60412783 | 61855282 | C | G | 862  | 7  | 0.01 | 277 | 219 | 0.44 | 585 | 143 | 0.20 | 2 | 2    | 2    | tier3 | shared           | 1 |
| 16 | 60907206 | 62349705 | G | A | 743  | 19 | 0.02 | 294 | 253 | 0.46 | 451 | 95  | 0.17 | 2 | 2    | 2    | tier2 | shared           | 0 |
| 16 | 61642452 | 63084951 | G | T | 879  | 8  | 0.01 | 333 | 268 | 0.45 | 456 | 118 | 0.21 | 2 | 2    | 2    | tier2 | shared           | 1 |
| 16 | 62479403 | 63921902 | G | C | 579  | 8  | 0.01 | 215 | 205 | 0.49 | 366 | 91  | 0.20 | 2 | 2    | 2    | tier3 | shared           | 1 |
| 16 | 62712754 | 64155253 | T | A | 679  | 10 | 0.01 | 261 | 239 | 0.48 | 457 | 106 | 0.19 | 2 | 2    | 2    | tier3 | shared           | 1 |
| 16 | 62829263 | 64271762 | A | T | 1109 | 9  | 0.01 | 742 | 229 | 0.24 | 977 | 0   | 0.00 | 2 | 2    | 2    | tier3 | tumor-specific   | 1 |
| 16 | 63209502 | 64652001 | G | T | 775  | 13 | 0.02 | 325 | 251 | 0.44 | 463 | 113 | 0.20 | 2 | 2    | 2    | tier2 | shared           | 1 |
| 16 | 65770615 | 67213114 | C | T | 481  | 10 | 0.02 | 244 | 176 | 0.42 | 268 | 84  | 0.24 | 2 | 2    | 2    | tier3 | shared           | 0 |
| 16 | 66217970 | 67660469 | C | T | 754  | 11 | 0.01 | 431 | 349 | 0.45 | 485 | 141 | 0.23 | 2 | 2    | 2    | tier1 | shared           | 2 |
| 16 | 6727010  | 6787009  | G | A | 614  | 10 | 0.02 | 59  | 522 | 0.90 | 252 | 188 | 0.43 | 2 | 2    | 2    | tier3 | shared           | 0 |
| 16 | 7071479  | 7131478  | G | T | 626  | 19 | 0.03 | 75  | 422 | 0.85 | 343 | 206 | 0.38 | 2 | 2    | 2    | tier2 | shared           | 0 |
| 16 | 72877051 | 74319550 | C | T | 736  | 6  | 0.01 | 346 | 277 | 0.44 | 541 | 141 | 0.21 | 2 | 2    | 2    | tier3 | shared           | 0 |
| 16 | 74089247 | 75531746 | G | T | 548  | 7  | 0.01 | 225 | 211 | 0.48 | 342 | 101 | 0.23 | 2 | 2    | 2    | tier3 | shared           | 2 |
| 16 | 76733310 | 78175809 | G | A | 381  | 8  | 0.02 | 104 | 108 | 0.51 | 348 | 92  | 0.21 | 2 | 2    | 2    | tier2 | shared           | 0 |
| 16 | 78153399 | 79595898 | C | A | 950  | 9  | 0.01 | 430 | 345 | 0.45 | 527 | 129 | 0.20 | 2 | 2    | 2    | tier3 | shared           | 0 |
| 16 | 7907101  | 7967100  | G | A | 779  | 12 | 0.02 | 45  | 523 | 0.92 | 279 | 193 | 0.41 | 2 | 2    | 2    | tier3 | shared           | 0 |
| 16 | 79588713 | 81031212 | A | G | 727  | 0  | 0.00 | 520 | 0   | 0.00 | 455 | 110 | 0.19 | 2 | 2    | 2    | tier3 | relapse-specific | 0 |
| 16 | 82546470 | 83988969 | G | A | 316  | 3  | 0.01 | 213 | 159 | 0.43 | 217 | 39  | 0.15 | 2 | 2    | 2    | tier3 | shared           | 0 |
| 16 | 84885805 | 86328304 | C | T | 779  | 8  | 0.01 | 460 | 370 | 0.45 | 581 | 157 | 0.21 | 2 | 2    | 2    | tier2 | shared           | 0 |
| 16 | 85959576 | 87402075 | G | A | 651  | 12 | 0.02 | 397 | 276 | 0.41 | 465 | 115 | 0.20 | 2 | 2    | 2    | tier2 | shared           | 0 |
| 17 | 13252186 | 13311461 | - | C | 656  | 2  | 0.00 | 357 | 238 | 0.40 | 509 | 129 | 0.20 | 2 | 2    | 2    | tier2 | shared           | 1 |
| 17 | 14981214 | 15040489 | T | G | 510  | 6  | 0.01 | 486 | 93  | 0.16 | 438 | 104 | 0.19 | 2 | 2    | 2    | tier2 | shared           | 1 |
| 17 | 16285101 | 16344376 | C | T | 762  | 11 | 0.01 | 389 | 287 | 0.42 | 507 | 150 | 0.23 | 2 | 2    | 2    | tier3 | shared           | 0 |
| 17 | 17227878 | 17287153 | G | A | 163  | 2  | 0.01 | 63  | 76  | 0.55 | 85  | 41  | 0.33 | 2 | 2    | 2    | tier1 | shared           | 0 |
| 17 | 18173889 | 18233164 | G | A | 543  | 4  | 0.01 | 238 | 242 | 0.50 | 435 | 118 | 0.21 | 2 | 2    | 2    | tier3 | shared           | 0 |
| 17 | 18225292 | 18284567 | C | T | 442  | 7  | 0.02 | 236 | 194 | 0.45 | 273 | 64  | 0.19 | 2 | 2    | 2    | tier3 | shared           | 0 |
| 17 | 19562643 | 19622051 | C | T | 401  | 9  | 0.02 | 231 | 196 | 0.46 | 258 | 79  | 0.23 | 2 | 2    | 2    | tier3 | shared           | 0 |
| 17 | 20787873 | 20847281 | C | T | 757  | 8  | 0.01 | 289 | 254 | 0.47 | 395 | 90  | 0.19 | 2 | 2    | 2    | tier3 | shared           | 0 |
| 17 | 21861423 | 21937296 | G | T | 690  | 9  | 0.01 | 252 | 200 | 0.44 | 351 | 75  | 0.18 | 2 | 2    | 2    | tier3 | shared           | 0 |
| 17 | 25062077 | 28037951 | C | T | 453  | 5  | 0.01 | 284 | 226 | 0.44 | 351 | 91  | 0.21 | 2 | 2    | 2    | tier3 | shared           | 0 |
| 17 | 26587107 | 29562981 | C | T | 638  | 10 | 0.02 | 41  | 266 | 0.87 | 372 | 123 | 0.25 | 2 | 1.04 | 2    | tier1 | shared           | 3 |
| 17 | 27317311 | 30293198 | G | A | 389  | 7  | 0.02 | 10  | 86  | 0.90 | 228 | 46  | 0.17 | 2 | 1.04 | 1.23 | tier1 | shared           | 2 |
| 17 | 29638693 | 32614580 | A | T | 677  | 10 | 0.01 | 281 | 254 | 0.47 | 405 | 120 | 0.23 | 2 | 2    | 2    | tier3 | shared           | 1 |
| 17 | 35203222 | 37949696 | G | A | 978  | 18 | 0.02 | 455 | 421 | 0.48 | 640 | 172 | 0.21 | 2 | 2    | 2    | tier3 | shared           | 1 |
| 17 | 35336721 | 38083195 | C | G | 514  | 4  | 0.01 | 323 | 218 | 0.40 | 340 | 86  | 0.20 | 2 | 2    | 2    | tier2 | shared           | 0 |
| 17 | 36960500 | 39706974 | T | A | 786  | 9  | 0.01 | 368 | 275 | 0.43 | 506 | 120 | 0.19 | 2 | 2    | 2    | tier3 | shared           | 2 |
| 17 | 38492196 | 41238670 | G | C | 944  | 12 | 0.01 | 375 | 297 | 0.44 | 622 | 125 | 0.17 | 2 | 2    | 2    | tier3 | shared           | 0 |
| 17 | 41464770 | 44108923 | C | T | 207  | 7  | 0.03 | 100 | 67  | 0.40 | 132 | 33  | 0.20 | 2 | 2    | 2    | tier1 | shared           | 2 |

|    |          |          |   |        |     |    |      |     |     |      |     |     |      |   |      |      |       |        |   |
|----|----------|----------|---|--------|-----|----|------|-----|-----|------|-----|-----|------|---|------|------|-------|--------|---|
| 17 | 44156725 | 46801726 | G | T      | 379 | 5  | 0.01 | 162 | 137 | 0.46 | 207 | 48  | 0.19 | 2 | 2    | 2    | tier1 | shared | 1 |
| 17 | 45903937 | 48548938 | C | T      | 555 | 10 | 0.02 | 309 | 259 | 0.46 | 335 | 96  | 0.22 | 2 | 2    | 2    | tier3 | shared | 1 |
| 17 | 52504691 | 55149692 | C | T      | 659 | 10 | 0.01 | 421 | 84  | 0.17 | 380 | 117 | 0.24 | 2 | 2    | 2    | tier3 | shared | 0 |
| 17 | 53937533 | 56582534 | - | GGTCAG | 783 | 7  | 0.01 | 664 | 116 | 0.15 | 483 | 89  | 0.16 | 2 | 2    | 2    | tier3 | shared | 0 |
| 17 | 55365250 | 58010468 | A | T      | 544 | 7  | 0.01 | 249 | 201 | 0.45 | 374 | 97  | 0.21 | 2 | 2    | 2    | tier3 | shared | 0 |
| 17 | 56755423 | 59400641 | T | C      | 560 | 11 | 0.02 | 232 | 179 | 0.44 | 435 | 105 | 0.19 | 2 | 2    | 2    | tier3 | shared | 0 |
| 17 | 5746607  | 5805883  | C | T      | 521 | 11 | 0.02 | 314 | 272 | 0.46 | 318 | 89  | 0.22 | 2 | 2    | 2    | tier3 | shared | 1 |
| 17 | 65996414 | 68484819 | T | A      | 558 | 4  | 0.01 | 254 | 234 | 0.48 | 483 | 118 | 0.20 | 2 | 2    | 2    | tier3 | shared | 1 |
| 17 | 66124108 | 68612513 | G | T      | 865 | 9  | 0.01 | 308 | 283 | 0.48 | 522 | 145 | 0.22 | 2 | 2    | 2    | tier3 | shared | 1 |
| 17 | 67097763 | 69586168 | A | C      | 639 | 5  | 0.01 | 272 | 252 | 0.48 | 441 | 111 | 0.20 | 2 | 2    | 2    | tier3 | shared | 0 |
| 17 | 67400601 | 69889006 | C | T      | 872 | 5  | 0.01 | 402 | 337 | 0.46 | 526 | 147 | 0.22 | 2 | 2    | 2    | tier2 | shared | 1 |
| 17 | 67884705 | 70373110 | A | -      | 405 | 33 | 0.08 | 161 | 142 | 0.47 | 212 | 72  | 0.25 | 2 | 2    | 2    | tier2 | shared | 0 |
| 17 | 72195638 | 74684043 | C | T      | 201 | 1  | 0.00 | 152 | 100 | 0.40 | 208 | 34  | 0.14 | 2 | 2    | 2    | tier3 | shared | 0 |
| 17 | 72401240 | 74889645 | G | A      | 485 | 4  | 0.01 | 387 | 93  | 0.19 | 326 | 83  | 0.20 | 2 | 2    | 2    | tier3 | shared | 1 |
| 17 | 74668164 | 77156569 | C | T      | 344 | 9  | 0.03 | 251 | 182 | 0.42 | 292 | 58  | 0.17 | 2 | 2    | 2    | tier2 | shared | 0 |
| 17 | 76214324 | 78599729 | G | A      | 377 | 4  | 0.01 | 173 | 130 | 0.43 | 396 | 86  | 0.18 | 2 | 2    | 2    | tier3 | shared | 0 |
| 17 | 78575203 | 80981914 | A | T      | 708 | 14 | 0.02 | 349 | 350 | 0.50 | 429 | 134 | 0.24 | 2 | 2    | 2    | tier3 | shared | 0 |
| 18 | 10252033 | 10262033 | T | C      | 754 | 8  | 0.01 | 345 | 294 | 0.46 | 435 | 115 | 0.21 | 2 | 2    | 2    | tier3 | shared | 1 |
| 18 | 11156222 | 11166222 | G | A      | 598 | 7  | 0.01 | 314 | 275 | 0.47 | 429 | 127 | 0.23 | 2 | 2    | 2    | tier3 | shared | 1 |
| 18 | 14588945 | 14598945 | C | A      | 670 | 8  | 0.01 | 240 | 157 | 0.40 | 341 | 71  | 0.17 | 2 | 1.09 | 1.26 | tier3 | shared | 0 |
| 18 | 18267507 | 20013509 | G | A      | 729 | 12 | 0.02 | 228 | 199 | 0.47 | 398 | 100 | 0.20 | 2 | 2    | 2    | tier3 | shared | 0 |
| 18 | 18370824 | 20116826 | C | T      | 648 | 9  | 0.01 | 326 | 259 | 0.44 | 434 | 136 | 0.24 | 2 | 2    | 2    | tier2 | shared | 1 |
| 18 | 23487973 | 25233975 | C | T      | 730 | 15 | 0.02 | 263 | 221 | 0.46 | 491 | 137 | 0.22 | 2 | 2    | 2    | tier3 | shared | 1 |
| 18 | 23513588 | 25259590 | C | G      | 877 | 10 | 0.01 | 386 | 357 | 0.48 | 636 | 157 | 0.20 | 2 | 2    | 2    | tier3 | shared | 1 |
| 18 | 26146117 | 27892119 | - | A      | 467 | 4  | 0.01 | 131 | 99  | 0.43 | 325 | 69  | 0.18 | 2 | 2    | 2    | tier3 | shared | 1 |
| 18 | 26875514 | 28621516 | G | A      | 507 | 8  | 0.02 | 247 | 219 | 0.47 | 305 | 93  | 0.23 | 2 | 2    | 2    | tier2 | shared | 0 |
| 18 | 28716219 | 30462221 | G | A      | 954 | 9  | 0.01 | 321 | 242 | 0.43 | 616 | 163 | 0.21 | 2 | 2    | 2    | tier3 | shared | 1 |
| 18 | 32301437 | 34047439 | C | T      | 400 | 3  | 0.01 | 266 | 197 | 0.43 | 333 | 91  | 0.21 | 2 | 2    | 2    | tier3 | shared | 0 |
| 18 | 33019829 | 34765831 | G | A      | 400 | 4  | 0.01 | 120 | 83  | 0.41 | 271 | 54  | 0.17 | 2 | 2    | 2    | tier3 | shared | 0 |
| 18 | 33422881 | 35168883 | T | -      | 190 | 6  | 0.03 | 99  | 49  | 0.33 | 195 | 42  | 0.18 | 2 | 2    | 2    | tier2 | shared | 0 |
| 18 | 36688146 | 38434148 | C | T      | 662 | 15 | 0.02 | 323 | 266 | 0.45 | 513 | 141 | 0.22 | 2 | 2    | 2    | tier3 | shared | 1 |
| 18 | 368469   | 378469   | C | T      | 577 | 7  | 0.01 | 278 | 258 | 0.48 | 299 | 89  | 0.23 | 2 | 2    | 2    | tier3 | shared | 0 |
| 18 | 40600060 | 42346062 | - | GT     | 490 | 12 | 0.02 | 305 | 185 | 0.38 | 352 | 59  | 0.14 | 2 | 2    | 2    | tier3 | shared | 1 |
| 18 | 44059580 | 45805582 | G | A      | 756 | 14 | 0.02 | 311 | 274 | 0.47 | 416 | 102 | 0.20 | 2 | 2    | 2    | tier3 | shared | 0 |
| 18 | 46473871 | 48219873 | C | T      | 844 | 2  | 0.00 | 359 | 293 | 0.45 | 533 | 135 | 0.20 | 2 | 2    | 2    | tier3 | shared | 0 |
| 18 | 51548336 | 53397338 | G | A      | 516 | 6  | 0.01 | 278 | 275 | 0.50 | 412 | 87  | 0.17 | 2 | 2    | 2    | tier3 | shared | 1 |
| 18 | 53088803 | 54937805 | G | A      | 878 | 14 | 0.02 | 368 | 349 | 0.49 | 680 | 154 | 0.18 | 2 | 2    | 2    | tier3 | shared | 0 |
| 18 | 56979477 | 58828497 | C | T      | 699 | 16 | 0.02 | 404 | 359 | 0.47 | 522 | 119 | 0.19 | 2 | 2    | 2    | tier3 | shared | 1 |
| 18 | 59684865 | 61533885 | G | A      | 651 | 8  | 0.01 | 290 | 233 | 0.45 | 459 | 131 | 0.22 | 2 | 2    | 2    | tier3 | shared | 0 |
| 18 | 59945136 | 61794156 | C | T      | 639 | 8  | 0.01 | 316 | 71  | 0.18 | 493 | 92  | 0.16 | 2 | 2    | 2    | tier2 | shared | 0 |

|    |           |           |   |          |     |    |      |     |     |      |     |     |      |   |   |   |       |                  |   |
|----|-----------|-----------|---|----------|-----|----|------|-----|-----|------|-----|-----|------|---|---|---|-------|------------------|---|
| 18 | 63759016  | 65608036  | G | A        | 596 | 2  | 0.00 | 253 | 187 | 0.43 | 381 | 95  | 0.20 | 2 | 2 | 2 | tier3 | shared           | 1 |
| 18 | 64227606  | 66076626  | T | -        | 481 | 22 | 0.04 | 165 | 121 | 0.42 | 308 | 76  | 0.20 | 2 | 2 | 2 | tier3 | shared           | 1 |
| 18 | 64854142  | 66703162  | G | A        | 717 | 9  | 0.01 | 271 | 214 | 0.44 | 441 | 104 | 0.19 | 2 | 2 | 2 | tier3 | shared           | 1 |
| 18 | 6593666   | 6603666   | C | T        | 553 | 1  | 0.00 | 491 | 0   | 0.00 | 365 | 95  | 0.21 | 2 | 2 | 2 | tier3 | relapse-specific | 0 |
| 18 | 66639122  | 68488142  | T | C        | 435 | 1  | 0.00 | 181 | 79  | 0.30 | 390 | 0   | 0.00 | 2 | 2 | 2 | tier3 | tumor-specific   | 1 |
| 18 | 71942227  | 73813239  | G | A        | 799 | 8  | 0.01 | 288 | 231 | 0.45 | 484 | 141 | 0.23 | 2 | 2 | 2 | tier3 | shared           | 1 |
| 18 | 73098218  | 74969230  | T | -        | 542 | 43 | 0.07 | 194 | 177 | 0.48 | 346 | 89  | 0.20 | 2 | 2 | 2 | tier3 | shared           | 0 |
| 18 | 73166661  | 75037673  | G | A        | 683 | 5  | 0.01 | 271 | 254 | 0.48 | 438 | 78  | 0.15 | 2 | 2 | 2 | tier3 | shared           | 1 |
| 18 | 73498391  | 75369403  | G | A        | 692 | 9  | 0.01 | 288 | 264 | 0.48 | 457 | 109 | 0.19 | 2 | 2 | 2 | tier3 | shared           | 1 |
| 18 | 8803690   | 8813690   | G | A        | 718 | 5  | 0.01 | 297 | 230 | 0.44 | 370 | 93  | 0.20 | 2 | 2 | 2 | tier3 | shared           | 1 |
| 19 | 10770237  | 10909237  | - | GCCATCGT | 457 | 5  | 0.01 | 246 | 147 | 0.37 | 269 | 55  | 0.17 | 2 | 2 | 2 | tier1 | shared           | 0 |
| 19 | 1339089   | 1388089   | G | A        | 409 | 0  | 0.00 | 337 | 0   | 0.00 | 242 | 55  | 0.19 | 2 | 2 | 2 | tier3 | relapse-specific | 0 |
| 19 | 16858458  | 16997458  | G | C        | 468 | 14 | 0.03 | 339 | 237 | 0.41 | 497 | 109 | 0.18 | 2 | 2 | 2 | tier3 | shared           | 0 |
| 19 | 18858533  | 18997533  | G | A        | 352 | 4  | 0.01 | 202 | 107 | 0.35 | 206 | 37  | 0.15 | 2 | 2 | 2 | tier2 | shared           | 0 |
| 19 | 19511501  | 19650501  | C | T        | 434 | 13 | 0.03 | 211 | 153 | 0.42 | 276 | 79  | 0.22 | 2 | 2 | 2 | tier1 | shared           | 1 |
| 19 | 33034534  | 28342694  | C | T        | 605 | 9  | 0.01 | 286 | 217 | 0.43 | 371 | 97  | 0.21 | 2 | 2 | 2 | tier3 | shared           | 0 |
| 19 | 34625104  | 29933264  | C | T        | 352 | 3  | 0.01 | 224 | 162 | 0.42 | 223 | 80  | 0.26 | 2 | 2 | 2 | tier3 | shared           | 0 |
| 19 | 35677114  | 30985274  | G | A        | 637 | 7  | 0.01 | 352 | 304 | 0.46 | 408 | 107 | 0.21 | 2 | 2 | 2 | tier3 | shared           | 0 |
| 19 | 35924138  | 31232298  | G | A        | 848 | 12 | 0.01 | 339 | 297 | 0.47 | 576 | 132 | 0.19 | 2 | 2 | 2 | tier3 | shared           | 1 |
| 19 | 37239780  | 32547940  | G | A        | 560 | 3  | 0.01 | 331 | 274 | 0.45 | 403 | 100 | 0.20 | 2 | 2 | 2 | tier3 | shared           | 1 |
| 19 | 37745682  | 33053842  | - | T        | 584 | 12 | 0.02 | 143 | 145 | 0.50 | 429 | 112 | 0.21 | 2 | 2 | 2 | tier3 | shared           | 0 |
| 19 | 37855446  | 33163606  | G | A        | 446 | 5  | 0.01 | 232 | 205 | 0.47 | 322 | 80  | 0.20 | 2 | 2 | 2 | tier2 | shared           | 1 |
| 19 | 38636663  | 33944823  | C | T        | 652 | 9  | 0.01 | 370 | 340 | 0.48 | 566 | 169 | 0.23 | 2 | 2 | 2 | tier3 | shared           | 0 |
| 19 | 39063795  | 34371955  | C | T        | 340 | 4  | 0.01 | 133 | 130 | 0.49 | 221 | 70  | 0.24 | 2 | 2 | 2 | tier3 | shared           | 0 |
| 19 | 40534990  | 35843150  | G | A        | 328 | 3  | 0.01 | 167 | 148 | 0.47 | 200 | 43  | 0.18 | 2 | 2 | 2 | tier1 | shared           | 1 |
| 19 | 40611308  | 35919468  | C | T        | 408 | 4  | 0.01 | 175 | 92  | 0.34 | 313 | 69  | 0.18 | 2 | 2 | 2 | tier3 | shared           | 0 |
| 19 | 42941321  | 38249481  | A | T        | 508 | 1  | 0.00 | 204 | 62  | 0.23 | 506 | 0   | 0.00 | 2 | 2 | 2 | tier3 | tumor-specific   | 0 |
| 19 | 44661403  | 39969563  | G | C        | 339 | 2  | 0.01 | 221 | 75  | 0.25 | 521 | 1   | 0.00 | 2 | 2 | 2 | tier2 | tumor-specific   | 0 |
| 19 | 47108048  | 42416208  | C | T        | 769 | 10 | 0.01 | 409 | 329 | 0.45 | 386 | 92  | 0.19 | 2 | 2 | 2 | tier2 | shared           | 0 |
| 19 | 53413830  | 48722018  | C | A        | 541 | 8  | 0.01 | 362 | 65  | 0.15 | 315 | 69  | 0.18 | 2 | 2 | 2 | tier3 | shared           | 0 |
| 19 | 55857216  | 51165404  | C | T        | 660 | 7  | 0.01 | 336 | 259 | 0.44 | 381 | 81  | 0.18 | 2 | 2 | 2 | tier1 | shared           | 2 |
| 19 | 5773127   | 5822127   | G | A        | 381 | 5  | 0.01 | 136 | 156 | 0.53 | 177 | 53  | 0.23 | 2 | 2 | 2 | tier3 | shared           | 1 |
| 19 | 57830425  | 53138613  | G | A        | 308 | 8  | 0.03 | 142 | 142 | 0.50 | 193 | 46  | 0.19 | 2 | 2 | 2 | tier3 | shared           | 0 |
| 19 | 58432183  | 53740371  | G | T        | 555 | 5  | 0.01 | 223 | 150 | 0.40 | 335 | 61  | 0.15 | 2 | 2 | 2 | tier1 | shared           | 1 |
| 19 | 58999238  | 54307426  | C | T        | 466 | 12 | 0.03 | 247 | 192 | 0.44 | 366 | 92  | 0.20 | 2 | 2 | 2 | tier3 | shared           | 0 |
| 19 | 60555201  | 55863389  | G | A        | 436 | 4  | 0.01 | 529 | 91  | 0.15 | 309 | 64  | 0.17 | 2 | 2 | 2 | tier2 | shared           | 0 |
| 19 | 62068178  | 57376366  | C | T        | 411 | 6  | 0.01 | 230 | 158 | 0.41 | 313 | 64  | 0.17 | 2 | 2 | 2 | tier2 | shared           | 0 |
| 19 | 63216065  | 58524253  | G | A        | 510 | 12 | 0.02 | 264 | 257 | 0.49 | 276 | 70  | 0.20 | 2 | 2 | 2 | tier3 | shared           | 0 |
| 2  | 100951891 | 101585459 | G | A        | 389 | 5  | 0.01 | 149 | 151 | 0.50 | 331 | 75  | 0.18 | 2 | 2 | 2 | tier3 | shared           | 1 |
| 2  | 100974121 | 101607689 | C | T        | 337 | 7  | 0.02 | 202 | 161 | 0.44 | 248 | 60  | 0.19 | 2 | 2 | 2 | tier2 | shared           | 1 |

|   |           |           |   |                     |      |    |      |     |     |      |     |     |      |   |   |   |       |                  |    |
|---|-----------|-----------|---|---------------------|------|----|------|-----|-----|------|-----|-----|------|---|---|---|-------|------------------|----|
| 2 | 101352567 | 101986135 | G | A                   | 1012 | 8  | 0.01 | 527 | 298 | 0.36 | 681 | 128 | 0.16 | 2 | 2 | 2 | tier3 | shared           | 0  |
| 2 | 101644202 | 102277770 | A | G                   | 250  | 3  | 0.01 | 89  | 79  | 0.47 | 180 | 34  | 0.16 | 2 | 2 | 2 | tier2 | shared           | 0  |
| 2 | 102946459 | 103580027 | C | A                   | 582  | 7  | 0.01 | 277 | 190 | 0.41 | 413 | 89  | 0.18 | 2 | 2 | 2 | tier3 | shared           | 1  |
| 2 | 103732160 | 104365728 | G | T                   | 742  | 8  | 0.01 | 224 | 219 | 0.49 | 427 | 94  | 0.18 | 2 | 2 | 2 | tier3 | shared           | 1  |
| 2 | 105927416 | 106560984 | C | T                   | 479  | 6  | 0.01 | 141 | 121 | 0.46 | 332 | 87  | 0.21 | 2 | 2 | 2 | tier3 | shared           | 0  |
| 2 | 108976530 | 109610098 | G | A                   | 725  | 5  | 0.01 | 416 | 357 | 0.46 | 547 | 156 | 0.22 | 2 | 2 | 2 | tier3 | shared           | 0  |
| 2 | 115898068 | 116181598 | C | T                   | 850  | 9  | 0.01 | 332 | 251 | 0.43 | 573 | 132 | 0.19 | 2 | 2 | 2 | tier3 | shared           | 0  |
| 2 | 116417004 | 116700534 | C | T                   | 626  | 9  | 0.01 | 308 | 280 | 0.48 | 497 | 124 | 0.20 | 2 | 2 | 2 | tier3 | shared           | 1  |
| 2 | 116686644 | 116970174 | G | A                   | 766  | 11 | 0.01 | 282 | 266 | 0.49 | 582 | 135 | 0.19 | 2 | 2 | 2 | tier3 | shared           | 1  |
| 2 | 116976596 | 117260126 | G | T                   | 462  | 10 | 0.02 | 179 | 111 | 0.38 | 389 | 107 | 0.22 | 2 | 2 | 2 | tier3 | shared           | 1  |
| 2 | 118458    | 128458    | G | A                   | 476  | 9  | 0.02 | 235 | 227 | 0.49 | 307 | 81  | 0.21 | 2 | 2 | 2 | tier3 | shared           | 0  |
| 2 | 118763902 | 119047432 | G | A                   | 760  | 7  | 0.01 | 412 | 81  | 0.16 | 493 | 116 | 0.19 | 2 | 2 | 2 | tier3 | shared           | 1  |
| 2 | 125273710 | 125557240 | T | C                   | 663  | 10 | 0.01 | 286 | 236 | 0.45 | 410 | 120 | 0.23 | 2 | 2 | 2 | tier3 | shared           | 2  |
| 2 | 131501602 | 131785132 | C | T                   | 949  | 12 | 0.01 | 363 | 307 | 0.46 | 530 | 133 | 0.20 | 2 | 2 | 2 | tier3 | shared           | 0  |
| 2 | 133304226 | 133587756 | C | A                   | 766  | 11 | 0.01 | 277 | 254 | 0.48 | 446 | 108 | 0.19 | 2 | 2 | 2 | tier3 | shared           | 1  |
| 2 | 138462489 | 138746019 | - | G                   | 656  | 9  | 0.01 | 312 | 243 | 0.44 | 417 | 99  | 0.19 | 2 | 2 | 2 | tier3 | shared           | 0  |
| 2 | 141704189 | 141987719 | C | T                   | 885  | 9  | 0.01 | 309 | 262 | 0.46 | 521 | 143 | 0.22 | 2 | 2 | 2 | tier3 | shared           | 4  |
| 2 | 14371539  | 14454088  | C | T                   | 834  | 7  | 0.01 | 329 | 274 | 0.45 | 552 | 113 | 0.17 | 2 | 2 | 2 | tier3 | shared           | 0  |
| 2 | 144039224 | 144322754 | - | GGCGGCGA<br>CCCGCCG | 411  | 3  | 0.01 | 186 | 59  | 0.24 | 430 | 37  | 0.08 | 2 | 2 | 2 | tier3 | shared           | 0  |
| 2 | 147777631 | 148061161 | T | A                   | 541  | 0  | 0.00 | 298 | 0   | 0.00 | 350 | 120 | 0.26 | 2 | 2 | 2 | tier3 | relapse-specific | 0  |
| 2 | 148426126 | 148709656 | G | A                   | 568  | 6  | 0.01 | 175 | 113 | 0.39 | 359 | 82  | 0.19 | 2 | 2 | 2 | tier3 | shared           | 0  |
| 2 | 151102056 | 151393810 | A | G                   | 482  | 8  | 0.02 | 114 | 92  | 0.45 | 316 | 59  | 0.16 | 2 | 2 | 2 | tier3 | shared           | 0  |
| 2 | 156266038 | 156557792 | T | C                   | 423  | 3  | 0.01 | 254 | 104 | 0.29 | 398 | 73  | 0.15 | 2 | 2 | 2 | tier3 | shared           | 1  |
| 2 | 157000487 | 157292241 | C | T                   | 161  | 4  | 0.02 | 96  | 86  | 0.47 | 145 | 30  | 0.17 | 2 | 2 | 2 | tier2 | shared           | 2  |
| 2 | 157144907 | 157436661 | A | T                   | 237  | 0  | 0.00 | 105 | 96  | 0.48 | 186 | 45  | 0.19 | 2 | 2 | 2 | tier3 | shared           | 2  |
| 2 | 158726162 | 159017916 | C | T                   | 676  | 7  | 0.01 | 357 | 273 | 0.43 | 511 | 109 | 0.18 | 2 | 2 | 2 | tier3 | shared           | 0  |
| 2 | 1684403   | 1705396   | C | T                   | 208  | 4  | 0.02 | 92  | 114 | 0.55 | 149 | 34  | 0.19 | 2 | 2 | 2 | tier3 | shared           | 0  |
| 2 | 169488496 | 169780250 | G | A                   | 813  | 10 | 0.01 | 324 | 287 | 0.47 | 408 | 114 | 0.22 | 2 | 2 | 2 | tier1 | shared           | 1  |
| 2 | 170014135 | 170305889 | C | T                   | 740  | 7  | 0.01 | 258 | 180 | 0.41 | 466 | 104 | 0.18 | 2 | 2 | 2 | tier3 | shared           | 0  |
| 2 | 172895156 | 173186910 | - | CCCCAGAGA           | 943  | 11 | 0.01 | 322 | 227 | 0.41 | 495 | 103 | 0.17 | 2 | 2 | 2 | tier2 | shared           | 1  |
| 2 | 174437766 | 174729520 | G | A                   | 917  | 9  | 0.01 | 470 | 406 | 0.46 | 536 | 175 | 0.25 | 2 | 2 | 2 | tier2 | shared           | 0  |
| 2 | 177304022 | 177595776 | C | T                   | 885  | 5  | 0.01 | 312 | 276 | 0.47 | 568 | 113 | 0.17 | 2 | 2 | 2 | tier3 | shared           | 0  |
| 2 | 177922539 | 178214293 | - | GA                  | 479  | 9  | 0.02 | 482 | 260 | 0.35 | 256 | 33  | 0.11 | 2 | 2 | 2 | tier2 | shared           | 0  |
| 2 | 178772824 | 179064578 | A | -                   | 660  | 11 | 0.02 | 236 | 172 | 0.42 | 409 | 86  | 0.17 | 2 | 2 | 2 | tier3 | shared           | 0  |
| 2 | 178850982 | 179142736 | C | T                   | 783  | 9  | 0.01 | 453 | 360 | 0.44 | 537 | 135 | 0.20 | 2 | 2 | 2 | tier3 | shared           | 0  |
| 2 | 179181002 | 179472757 | - | GAC                 | 844  | 6  | 0.01 | 512 | 127 | 0.20 | 667 | 62  | 0.09 | 2 | 2 | 2 | tier1 | shared           | 12 |
| 2 | 183591905 | 183883660 | G | A                   | 506  | 5  | 0.01 | 217 | 180 | 0.45 | 484 | 119 | 0.20 | 2 | 2 | 2 | tier3 | shared           | 0  |
| 2 | 184617885 | 184909640 | C | T                   | 689  | 11 | 0.02 | 288 | 223 | 0.44 | 474 | 104 | 0.18 | 2 | 2 | 2 | tier3 | shared           | 1  |
| 2 | 18529058  | 18665577  | - | A                   | 217  | 3  | 0.01 | 81  | 46  | 0.36 | 229 | 50  | 0.18 | 2 | 2 | 2 | tier3 | shared           | 1  |
| 2 | 185768090 | 186059845 | A | G                   | 704  | 18 | 0.02 | 246 | 205 | 0.45 | 561 | 148 | 0.21 | 2 | 2 | 2 | tier3 | shared           | 1  |

|   |           |           |         |    |      |    |      |     |     |      |     |     |      |   |   |   |       |                |   |
|---|-----------|-----------|---------|----|------|----|------|-----|-----|------|-----|-----|------|---|---|---|-------|----------------|---|
| 2 | 186405735 | 186697490 | G       | A  | 448  | 2  | 0.00 | 145 | 78  | 0.35 | 311 | 73  | 0.19 | 2 | 2 | 2 | tier3 | shared         | 0 |
| 2 | 188554119 | 188845874 | G       | A  | 267  | 3  | 0.01 | 84  | 66  | 0.44 | 251 | 48  | 0.16 | 2 | 2 | 2 | tier3 | shared         | 1 |
| 2 | 189640171 | 189931926 | G       | A  | 488  | 15 | 0.03 | 150 | 98  | 0.40 | 412 | 97  | 0.19 | 2 | 2 | 2 | tier3 | shared         | 0 |
| 2 | 190632484 | 190924239 | T       | C  | 341  | 2  | 0.01 | 151 | 141 | 0.48 | 414 | 98  | 0.19 | 2 | 2 | 2 | tier3 | shared         | 0 |
| 2 | 193034189 | 193325944 | A       | -  | 417  | 29 | 0.07 | 139 | 110 | 0.44 | 275 | 83  | 0.23 | 2 | 2 | 2 | tier3 | shared         | 1 |
| 2 | 19391113  | 19527632  | G       | A  | 993  | 12 | 0.01 | 456 | 327 | 0.42 | 609 | 168 | 0.22 | 2 | 2 | 2 | tier3 | shared         | 0 |
| 2 | 204365567 | 204657322 | T       | C  | 727  | 9  | 0.01 | 292 | 242 | 0.45 | 415 | 100 | 0.19 | 2 | 2 | 2 | tier3 | shared         | 0 |
| 2 | 206131128 | 206422883 | C       | A  | 773  | 9  | 0.01 | 365 | 253 | 0.41 | 429 | 106 | 0.20 | 2 | 2 | 2 | tier3 | shared         | 0 |
| 2 | 206152603 | 206444358 | G       | A  | 599  | 8  | 0.01 | 246 | 219 | 0.47 | 398 | 105 | 0.21 | 2 | 2 | 2 | tier2 | shared         | 0 |
| 2 | 206976570 | 207268325 | -       | T  | 338  | 9  | 0.03 | 135 | 94  | 0.41 | 228 | 42  | 0.16 | 2 | 2 | 2 | tier3 | shared         | 0 |
| 2 | 208047027 | 208338782 | -       | TT | 625  | 8  | 0.01 | 227 | 173 | 0.43 | 351 | 93  | 0.21 | 2 | 2 | 2 | tier3 | shared         | 1 |
| 2 | 209526236 | 209817991 | C       | T  | 546  | 12 | 0.02 | 265 | 196 | 0.43 | 559 | 132 | 0.19 | 2 | 2 | 2 | tier3 | shared         | 0 |
| 2 | 211114327 | 211406082 | G       | A  | 687  | 13 | 0.02 | 275 | 231 | 0.46 | 416 | 97  | 0.19 | 2 | 2 | 2 | tier2 | shared         | 0 |
| 2 | 211283939 | 211575694 | C       | T  | 640  | 5  | 0.01 | 249 | 191 | 0.43 | 373 | 95  | 0.20 | 2 | 2 | 2 | tier3 | shared         | 0 |
| 2 | 21462746  | 21609241  | T       | G  | 868  | 10 | 0.01 | 359 | 321 | 0.47 | 606 | 145 | 0.19 | 2 | 2 | 2 | tier3 | shared         | 1 |
| 2 | 222406435 | 222698191 | G       | A  | 521  | 3  | 0.01 | 323 | 65  | 0.17 | 315 | 85  | 0.21 | 2 | 2 | 2 | tier2 | shared         | 1 |
| 2 | 227762967 | 228054723 | C       | T  | 918  | 17 | 0.02 | 415 | 350 | 0.46 | 601 | 138 | 0.19 | 2 | 2 | 2 | tier3 | shared         | 1 |
| 2 | 23233620  | 23380115  | C       | A  | 866  | 12 | 0.01 | 266 | 237 | 0.47 | 561 | 150 | 0.21 | 2 | 2 | 2 | tier2 | shared         | 1 |
| 2 | 234326238 | 234661499 | A       | T  | 791  | 3  | 0.00 | 606 | 124 | 0.17 | 589 | 122 | 0.17 | 2 | 2 | 2 | tier3 | shared         | 0 |
| 2 | 236198765 | 236534026 | G       | A  | 570  | 15 | 0.03 | 329 | 258 | 0.44 | 433 | 103 | 0.19 | 2 | 2 | 2 | tier2 | shared         | 0 |
| 2 | 237129575 | 237464836 | A       | G  | 337  | 3  | 0.01 | 199 | 166 | 0.45 | 256 | 63  | 0.20 | 2 | 2 | 2 | tier3 | shared         | 0 |
| 2 | 239464461 | 239799524 | G       | A  | 798  | 11 | 0.01 | 356 | 330 | 0.48 | 554 | 135 | 0.20 | 2 | 2 | 2 | tier3 | shared         | 0 |
| 2 | 240260571 | 240595634 | G       | A  | 569  | 5  | 0.01 | 282 | 231 | 0.45 | 369 | 85  | 0.19 | 2 | 2 | 2 | tier3 | shared         | 0 |
| 2 | 28074844  | 28221340  | -       | T  | 510  | 12 | 0.02 | 119 | 75  | 0.39 | 311 | 80  | 0.20 | 2 | 2 | 2 | tier3 | shared         | 0 |
| 2 | 28786413  | 28932909  | TAATTAA | -  | 526  | 3  | 0.01 | 232 | 216 | 0.48 | 321 | 71  | 0.18 | 2 | 2 | 2 | tier3 | shared         | 0 |
| 2 | 2895021   | 2916014   | C       | T  | 548  | 6  | 0.01 | 243 | 199 | 0.45 | 308 | 59  | 0.16 | 2 | 2 | 2 | tier2 | shared         | 1 |
| 2 | 34022984  | 34169480  | T       | -  | 597  | 23 | 0.04 | 392 | 273 | 0.41 | 535 | 158 | 0.23 | 2 | 2 | 2 | tier3 | shared         | 1 |
| 2 | 34651077  | 34797573  | T       | -  | 612  | 6  | 0.01 | 210 | 136 | 0.39 | 516 | 121 | 0.19 | 2 | 2 | 2 | tier3 | shared         | 1 |
| 2 | 35718525  | 35865021  | G       | A  | 836  | 13 | 0.02 | 377 | 221 | 0.37 | 587 | 118 | 0.17 | 2 | 2 | 2 | tier3 | shared         | 1 |
| 2 | 3703521   | 3725646   | G       | A  | 644  | 14 | 0.02 | 324 | 257 | 0.44 | 427 | 101 | 0.19 | 2 | 2 | 2 | tier2 | shared         | 2 |
| 2 | 39034368  | 39180864  | A       | T  | 1025 | 4  | 0.00 | 626 | 178 | 0.22 | 703 | 0   | 0.00 | 2 | 2 | 2 | tier3 | tumor-specific | 0 |
| 2 | 43770990  | 43917486  | T       | -  | 313  | 25 | 0.07 | 240 | 48  | 0.17 | 249 | 62  | 0.20 | 2 | 2 | 2 | tier3 | shared         | 0 |
| 2 | 44812014  | 44958510  | C       | G  | 531  | 8  | 0.01 | 265 | 188 | 0.42 | 339 | 78  | 0.19 | 2 | 2 | 2 | tier3 | shared         | 1 |
| 2 | 4534542   | 4556667   | G       | T  | 714  | 10 | 0.01 | 355 | 333 | 0.48 | 542 | 108 | 0.17 | 2 | 2 | 2 | tier3 | shared         | 0 |
| 2 | 47676114  | 47822610  | C       | A  | 413  | 9  | 0.02 | 208 | 163 | 0.44 | 327 | 67  | 0.17 | 2 | 2 | 2 | tier3 | shared         | 0 |
| 2 | 4835095   | 4857220   | G       | T  | 445  | 4  | 0.01 | 144 | 82  | 0.36 | 270 | 70  | 0.21 | 2 | 2 | 2 | tier3 | shared         | 0 |
| 2 | 49557457  | 49703953  | G       | A  | 491  | 2  | 0.00 | 120 | 68  | 0.36 | 282 | 70  | 0.20 | 2 | 2 | 2 | tier3 | shared         | 1 |
| 2 | 50905412  | 51051908  | G       | C  | 614  | 6  | 0.01 | 302 | 266 | 0.47 | 537 | 149 | 0.22 | 2 | 2 | 2 | tier3 | shared         | 1 |
| 2 | 52327615  | 52474111  | C       | A  | 476  | 9  | 0.02 | 131 | 122 | 0.48 | 400 | 117 | 0.23 | 2 | 2 | 2 | tier2 | shared         | 1 |
| 2 | 5486989   | 5569538   | C       | T  | 944  | 12 | 0.01 | 375 | 309 | 0.45 | 660 | 151 | 0.19 | 2 | 2 | 2 | tier3 | shared         | 1 |



|    |          |           |       |           |     |    |      |     |     |      |     |     |      |   |   |   |       |                |   |
|----|----------|-----------|-------|-----------|-----|----|------|-----|-----|------|-----|-----|------|---|---|---|-------|----------------|---|
| 2  | 5650617  | 5733166   | A     | -         | 460 | 18 | 0.04 | 139 | 101 | 0.42 | 260 | 61  | 0.19 | 2 | 2 | 2 | tier3 | shared         | 1 |
| 2  | 57449163 | 57595659  | T     | C         | 508 | 8  | 0.02 | 256 | 208 | 0.45 | 462 | 114 | 0.20 | 2 | 2 | 2 | tier3 | shared         | 1 |
| 2  | 59650870 | 59797366  | T     | A         | 367 | 5  | 0.01 | 185 | 148 | 0.44 | 277 | 81  | 0.23 | 2 | 2 | 2 | tier2 | shared         | 0 |
| 2  | 66396484 | 66542980  | C     | A         | 587 | 13 | 0.02 | 280 | 215 | 0.43 | 422 | 94  | 0.18 | 2 | 2 | 2 | tier3 | shared         | 0 |
| 2  | 67805940 | 67952436  | G     | A         | 815 | 14 | 0.02 | 347 | 225 | 0.39 | 532 | 134 | 0.20 | 2 | 2 | 2 | tier3 | shared         | 1 |
| 2  | 68345908 | 68492404  | C     | T         | 783 | 6  | 0.01 | 364 | 255 | 0.41 | 521 | 117 | 0.18 | 2 | 2 | 2 | tier3 | shared         | 0 |
| 2  | 7081077  | 7163626   | A     | G         | 720 | 11 | 0.02 | 322 | 290 | 0.47 | 550 | 135 | 0.20 | 2 | 2 | 2 | tier3 | shared         | 0 |
| 2  | 72405888 | 72552380  | A     | G         | 844 | 15 | 0.02 | 372 | 334 | 0.47 | 676 | 146 | 0.18 | 2 | 2 | 2 | tier3 | shared         | 0 |
| 2  | 74498548 | 74645040  | G     | A         | 210 | 5  | 0.02 | 122 | 96  | 0.44 | 173 | 0   | 0.00 | 2 | 2 | 2 | tier3 | tumor-specific | 2 |
| 2  | 77783494 | 77929986  | A     | G         | 350 | 3  | 0.01 | 95  | 80  | 0.46 | 250 | 42  | 0.14 | 2 | 2 | 2 | tier3 | shared         | 0 |
| 2  | 77922371 | 78068863  | A     | T         | 622 | 8  | 0.01 | 219 | 177 | 0.45 | 411 | 107 | 0.21 | 2 | 2 | 2 | tier2 | shared         | 1 |
| 2  | 79831845 | 79978337  | C     | G         | 615 | 12 | 0.02 | 266 | 220 | 0.45 | 537 | 134 | 0.20 | 2 | 2 | 2 | tier3 | shared         | 1 |
| 2  | 80018562 | 80165051  | C     | A         | 633 | 10 | 0.02 | 243 | 176 | 0.42 | 401 | 102 | 0.20 | 2 | 2 | 2 | tier3 | shared         | 1 |
| 2  | 81196674 | 81343163  | G     | T         | 479 | 5  | 0.01 | 216 | 159 | 0.42 | 313 | 67  | 0.18 | 2 | 2 | 2 | tier3 | shared         | 1 |
| 2  | 82418827 | 82565316  | A     | G         | 670 | 10 | 0.01 | 263 | 234 | 0.47 | 487 | 103 | 0.17 | 2 | 2 | 2 | tier3 | shared         | 0 |
| 2  | 82787207 | 82933696  | C     | T         | 656 | 7  | 0.01 | 329 | 272 | 0.45 | 511 | 105 | 0.17 | 2 | 2 | 2 | tier3 | shared         | 1 |
| 2  | 84327755 | 84474244  | G     | A         | 771 | 10 | 0.01 | 368 | 392 | 0.52 | 654 | 160 | 0.20 | 2 | 2 | 2 | tier3 | shared         | 0 |
| 2  | 88836257 | 89055142  | GAGTT | -         | 631 | 12 | 0.02 | 325 | 231 | 0.42 | 509 | 125 | 0.20 | 2 | 2 | 2 | tier3 | shared         | 0 |
| 2  | 94793322 | 95429595  | C     | A         | 88  | 1  | 0.01 | 61  | 54  | 0.47 | 62  | 23  | 0.27 | 2 | 2 | 2 | tier3 | shared         | 0 |
| 2  | 96121006 | 96757279  | C     | T         | 528 | 4  | 0.01 | 314 | 242 | 0.44 | 380 | 65  | 0.15 | 2 | 2 | 2 | tier2 | shared         | 0 |
| 2  | 963422   | 973422    | C     | T         | 798 | 7  | 0.01 | 428 | 337 | 0.44 | 445 | 115 | 0.21 | 2 | 2 | 2 | tier3 | shared         | 0 |
| 2  | 99819633 | 100453201 | A     | G         | 400 | 7  | 0.02 | 121 | 117 | 0.49 | 266 | 66  | 0.20 | 2 | 2 | 2 | tier2 | shared         | 0 |
| 20 | 11740319 | 11792319  | T     | C         | 439 | 3  | 0.01 | 140 | 129 | 0.48 | 291 | 93  | 0.24 | 2 | 2 | 2 | tier3 | shared         | 0 |
| 20 | 11897877 | 11949877  | -     | A         | 345 | 3  | 0.01 | 173 | 126 | 0.42 | 200 | 45  | 0.18 | 2 | 2 | 2 | tier3 | shared         | 0 |
| 20 | 13605323 | 13657323  | A     | C         | 612 | 13 | 0.02 | 208 | 214 | 0.51 | 418 | 103 | 0.20 | 2 | 2 | 2 | tier3 | shared         | 0 |
| 20 | 15227176 | 15279176  | A     | G         | 586 | 9  | 0.02 | 269 | 247 | 0.48 | 386 | 111 | 0.22 | 2 | 2 | 2 | tier3 | shared         | 0 |
| 20 | 15733935 | 15785935  | C     | T         | 631 | 10 | 0.02 | 278 | 185 | 0.40 | 378 | 96  | 0.20 | 2 | 2 | 2 | tier3 | shared         | 0 |
| 20 | 21076958 | 21128958  | T     | C         | 661 | 12 | 0.02 | 261 | 202 | 0.44 | 492 | 129 | 0.21 | 2 | 2 | 2 | tier3 | shared         | 0 |
| 20 | 21453856 | 21505856  | A     | T         | 973 | 7  | 0.01 | 449 | 415 | 0.48 | 665 | 155 | 0.19 | 2 | 2 | 2 | tier3 | shared         | 0 |
| 20 | 22441415 | 22493415  | G     | A         | 493 | 7  | 0.01 | 231 | 181 | 0.44 | 288 | 81  | 0.22 | 2 | 2 | 2 | tier3 | shared         | 1 |
| 20 | 24902759 | 24954759  | G     | A         | 768 | 11 | 0.01 | 295 | 242 | 0.45 | 507 | 133 | 0.21 | 2 | 2 | 2 | tier3 | shared         | 0 |
| 20 | 33485469 | 34022055  | A     | T         | 256 | 4  | 0.02 | 114 | 86  | 0.43 | 130 | 37  | 0.22 | 2 | 2 | 2 | tier1 | shared         | 0 |
| 20 | 3603624  | 3655624   | -     | G         | 221 | 4  | 0.02 | 202 | 149 | 0.42 | 264 | 57  | 0.18 | 2 | 2 | 2 | tier3 | shared         | 0 |
| 20 | 37978602 | 38545188  | C     | T         | 698 | 8  | 0.01 | 356 | 304 | 0.46 | 471 | 93  | 0.16 | 2 | 2 | 2 | tier3 | shared         | 0 |
| 20 | 4260112  | 4312112   | C     | A         | 510 | 17 | 0.03 | 298 | 286 | 0.49 | 423 | 126 | 0.23 | 2 | 2 | 2 | tier3 | shared         | 1 |
| 20 | 48432454 | 48999047  | -     | GGGCCAGAG | 546 | 7  | 0.01 | 330 | 164 | 0.33 | 367 | 75  | 0.17 | 2 | 2 | 2 | tier3 | shared         | 0 |
| 20 | 50410533 | 50977126  | G     | A         | 642 | 5  | 0.01 | 292 | 233 | 0.44 | 408 | 115 | 0.22 | 2 | 2 | 2 | tier3 | shared         | 1 |
| 20 | 53981980 | 54548573  | G     | T         | 345 | 17 | 0.05 | 250 | 187 | 0.43 | 335 | 84  | 0.20 | 2 | 2 | 2 | tier3 | shared         | 0 |
| 20 | 5556509  | 5608509   | C     | T         | 851 | 14 | 0.02 | 413 | 321 | 0.44 | 498 | 134 | 0.21 | 2 | 2 | 2 | tier3 | shared         | 0 |
| 20 | 56588797 | 57155391  | C     | T         | 424 | 6  | 0.01 | 208 | 159 | 0.43 | 323 | 68  | 0.17 | 2 | 2 | 2 | tier3 | shared         | 0 |

|    |          |          |   |       |      |    |      |     |     |      |     |     |      |   |   |   |       |                  |    |
|----|----------|----------|---|-------|------|----|------|-----|-----|------|-----|-----|------|---|---|---|-------|------------------|----|
| 20 | 57500227 | 58066832 | C | T     | 662  | 10 | 0.01 | 362 | 284 | 0.44 | 480 | 113 | 0.19 | 2 | 2 | 2 | tier3 | shared           | 0  |
| 20 | 59147387 | 59713992 | C | T     | 482  | 7  | 0.01 | 181 | 180 | 0.50 | 280 | 69  | 0.20 | 2 | 2 | 2 | tier3 | shared           | 1  |
| 20 | 59694017 | 60260622 | G | A     | 648  | 12 | 0.02 | 341 | 246 | 0.42 | 350 | 99  | 0.22 | 2 | 2 | 2 | tier3 | shared           | 1  |
| 20 | 60494666 | 61061271 | A | T     | 520  | 7  | 0.01 | 226 | 166 | 0.42 | 312 | 56  | 0.15 | 2 | 2 | 2 | tier3 | shared           | 0  |
| 20 | 61097191 | 61626746 | C | T     | 582  | 8  | 0.01 | 341 | 271 | 0.44 | 434 | 83  | 0.16 | 2 | 2 | 2 | tier3 | shared           | 0  |
| 20 | 61196445 | 61726000 | G | A     | 585  | 15 | 0.03 | 306 | 264 | 0.46 | 359 | 79  | 0.18 | 2 | 2 | 2 | tier3 | shared           | 0  |
| 20 | 842287   | 894287   | G | A     | 968  | 11 | 0.01 | 486 | 487 | 0.50 | 548 | 154 | 0.22 | 2 | 2 | 2 | tier3 | shared           | 0  |
| 21 | 15397360 | 16475489 | - | T     | 506  | 7  | 0.01 | 272 | 143 | 0.34 | 438 | 89  | 0.17 | 2 | 2 | 2 | tier3 | shared           | 0  |
| 21 | 16144190 | 17222319 | C | T     | 299  | 4  | 0.01 | 83  | 60  | 0.42 | 281 | 67  | 0.19 | 2 | 2 | 2 | tier3 | shared           | 0  |
| 21 | 16338704 | 17416833 | C | T     | 622  | 12 | 0.02 | 195 | 145 | 0.43 | 343 | 86  | 0.20 | 2 | 2 | 2 | tier3 | shared           | 0  |
| 21 | 19075723 | 20153852 | A | G     | 563  | 10 | 0.02 | 268 | 244 | 0.48 | 332 | 78  | 0.19 | 2 | 2 | 2 | tier3 | shared           | 1  |
| 21 | 19352744 | 20430873 | A | C     | 487  | 7  | 0.01 | 97  | 108 | 0.53 | 453 | 136 | 0.23 | 2 | 2 | 2 | tier3 | shared           | 1  |
| 21 | 21921868 | 22999997 | A | C     | 768  | 15 | 0.02 | 322 | 251 | 0.44 | 464 | 117 | 0.20 | 2 | 2 | 2 | tier3 | shared           | 0  |
| 21 | 23932660 | 25010789 | C | T     | 654  | 7  | 0.01 | 229 | 187 | 0.45 | 381 | 111 | 0.23 | 2 | 2 | 2 | tier2 | shared           | 1  |
| 21 | 24117139 | 25195268 | C | A     | 698  | 9  | 0.01 | 279 | 206 | 0.42 | 468 | 118 | 0.20 | 2 | 2 | 2 | tier3 | shared           | 1  |
| 21 | 24167684 | 25245813 | G | A     | 626  | 8  | 0.01 | 202 | 179 | 0.47 | 401 | 107 | 0.21 | 2 | 2 | 2 | tier3 | shared           | 1  |
| 21 | 24984752 | 26062881 | C | A     | 461  | 3  | 0.01 | 102 | 69  | 0.40 | 288 | 57  | 0.17 | 2 | 2 | 2 | tier3 | shared           | 1  |
| 21 | 27892746 | 28970875 | A | G     | 852  | 19 | 0.02 | 426 | 332 | 0.44 | 589 | 138 | 0.19 | 2 | 2 | 2 | tier2 | shared           | 1  |
| 21 | 30692169 | 31770298 | C | T     | 692  | 0  | 0.00 | 611 | 0   | 0.00 | 548 | 116 | 0.17 | 2 | 2 | 2 | tier3 | relapse-specific | 0  |
| 21 | 35174739 | 36252869 | - | GGCTA | 532  | 6  | 0.01 | 306 | 188 | 0.38 | 437 | 76  | 0.15 | 2 | 2 | 2 | tier1 | shared           | 16 |
| 21 | 35543051 | 36621181 | A | G     | 616  | 11 | 0.02 | 320 | 237 | 0.43 | 328 | 109 | 0.25 | 2 | 2 | 2 | tier2 | shared           | 1  |
| 21 | 37017631 | 38095761 | C | T     | 519  | 9  | 0.02 | 258 | 245 | 0.49 | 303 | 77  | 0.20 | 2 | 2 | 2 | tier3 | shared           | 0  |
| 21 | 37380897 | 38459027 | T | A     | 790  | 9  | 0.01 | 402 | 322 | 0.44 | 497 | 129 | 0.21 | 2 | 2 | 2 | tier3 | shared           | 2  |
| 21 | 38837308 | 39915438 | A | C     | 623  | 9  | 0.01 | 197 | 156 | 0.44 | 462 | 94  | 0.17 | 2 | 2 | 2 | tier3 | shared           | 0  |
| 21 | 44204493 | 45380065 | G | A     | 783  | 9  | 0.01 | 481 | 428 | 0.47 | 563 | 159 | 0.22 | 2 | 2 | 2 | tier3 | shared           | 0  |
| 21 | 46795914 | 47971486 | T | C     | 892  | 12 | 0.01 | 309 | 281 | 0.48 | 449 | 120 | 0.21 | 2 | 2 | 2 | tier3 | shared           | 1  |
| 22 | 18037304 | 19657304 | G | A     | 604  | 8  | 0.01 | 277 | 227 | 0.45 | 495 | 100 | 0.17 | 2 | 2 | 2 | tier3 | shared           | 0  |
| 22 | 26058330 | 27728330 | G | A     | 318  | 12 | 0.04 | 146 | 136 | 0.48 | 241 | 59  | 0.20 | 2 | 2 | 2 | tier2 | shared           | 1  |
| 22 | 27622622 | 29292622 | C | A     | 798  | 13 | 0.02 | 309 | 287 | 0.48 | 533 | 129 | 0.19 | 2 | 2 | 2 | tier3 | shared           | 0  |
| 22 | 30654997 | 32324997 | C | A     | 562  | 11 | 0.02 | 293 | 270 | 0.48 | 409 | 81  | 0.17 | 2 | 2 | 2 | tier3 | shared           | 0  |
| 22 | 31549562 | 33219562 | G | A     | 734  | 14 | 0.02 | 354 | 270 | 0.43 | 446 | 120 | 0.21 | 2 | 2 | 2 | tier3 | shared           | 1  |
| 22 | 33807628 | 35477628 | A | G     | 444  | 5  | 0.01 | 294 | 246 | 0.46 | 325 | 88  | 0.21 | 2 | 2 | 2 | tier3 | shared           | 0  |
| 22 | 37565854 | 39235908 | T | G     | 707  | 7  | 0.01 | 283 | 207 | 0.42 | 394 | 79  | 0.17 | 2 | 2 | 2 | tier3 | shared           | 1  |
| 22 | 37566187 | 39236241 | G | T     | 307  | 5  | 0.02 | 188 | 151 | 0.45 | 199 | 59  | 0.23 | 2 | 2 | 2 | tier3 | shared           | 1  |
| 22 | 38685367 | 40355421 | C | T     | 246  | 5  | 0.02 | 149 | 185 | 0.55 | 171 | 66  | 0.28 | 2 | 2 | 2 | tier3 | shared           | 0  |
| 22 | 38693185 | 40363239 | G | A     | 944  | 7  | 0.01 | 456 | 377 | 0.45 | 693 | 128 | 0.16 | 2 | 2 | 2 | tier3 | shared           | 0  |
| 22 | 40994686 | 42664742 | - | A     | 1011 | 15 | 0.01 | 456 | 341 | 0.43 | 586 | 139 | 0.19 | 2 | 2 | 2 | tier3 | shared           | 0  |
| 22 | 43811533 | 45432869 | C | T     | 809  | 13 | 0.02 | 396 | 337 | 0.46 | 616 | 105 | 0.15 | 2 | 2 | 2 | tier3 | shared           | 0  |
| 22 | 45357133 | 46978469 | G | A     | 476  | 4  | 0.01 | 368 | 129 | 0.26 | 459 | 0   | 0.00 | 2 | 2 | 2 | tier3 | tumor-specific   | 1  |
| 22 | 47301588 | 48922924 | G | A     | 398  | 10 | 0.02 | 228 | 181 | 0.44 | 315 | 77  | 0.20 | 2 | 2 | 2 | tier3 | shared           | 0  |

|    |           |           |   |   |      |    |      |     |     |      |     |     |      |   |   |   |       |                |   |
|----|-----------|-----------|---|---|------|----|------|-----|-----|------|-----|-----|------|---|---|---|-------|----------------|---|
| 22 | 47525066  | 49139060  | C | T | 519  | 8  | 0.02 | 264 | 215 | 0.45 | 279 | 56  | 0.17 | 2 | 2 | 2 | tier3 | shared         | 0 |
| 3  | 10155644  | 10180644  | G | A | 716  | 6  | 0.01 | 286 | 213 | 0.43 | 563 | 131 | 0.19 | 2 | 2 | 2 | tier3 | shared         | 0 |
| 3  | 10231291  | 10256291  | A | T | 644  | 6  | 0.01 | 183 | 181 | 0.50 | 439 | 149 | 0.25 | 2 | 2 | 2 | tier3 | shared         | 0 |
| 3  | 10636309  | 10661309  | C | T | 474  | 10 | 0.02 | 285 | 189 | 0.40 | 300 | 68  | 0.18 | 2 | 2 | 2 | tier2 | shared         | 2 |
| 3  | 110985679 | 109502989 | T | A | 628  | 9  | 0.01 | 154 | 150 | 0.49 | 412 | 102 | 0.20 | 2 | 2 | 2 | tier3 | shared         | 1 |
| 3  | 111440867 | 109958177 | A | G | 701  | 10 | 0.01 | 259 | 201 | 0.44 | 466 | 110 | 0.19 | 2 | 2 | 2 | tier3 | shared         | 1 |
| 3  | 11182425  | 11207425  | A | G | 728  | 7  | 0.01 | 384 | 287 | 0.43 | 448 | 116 | 0.21 | 2 | 2 | 2 | tier2 | shared         | 0 |
| 3  | 112622545 | 111139855 | C | T | 691  | 9  | 0.01 | 236 | 184 | 0.44 | 395 | 100 | 0.20 | 2 | 2 | 2 | tier3 | shared         | 1 |
| 3  | 114733815 | 113251125 | - | T | 303  | 12 | 0.04 | 151 | 97  | 0.39 | 227 | 29  | 0.11 | 2 | 2 | 2 | tier2 | shared         | 0 |
| 3  | 1151817   | 1176817   | G | T | 574  | 7  | 0.01 | 256 | 255 | 0.50 | 483 | 120 | 0.20 | 2 | 2 | 2 | tier2 | shared         | 1 |
| 3  | 115862709 | 114380019 | G | C | 718  | 9  | 0.01 | 532 | 111 | 0.17 | 490 | 130 | 0.21 | 2 | 2 | 2 | tier3 | shared         | 0 |
| 3  | 116000742 | 114518052 | G | C | 1208 | 21 | 0.02 | 477 | 390 | 0.45 | 644 | 195 | 0.23 | 2 | 2 | 2 | tier3 | shared         | 0 |
| 3  | 117215291 | 115732601 | A | G | 499  | 4  | 0.01 | 198 | 157 | 0.44 | 425 | 93  | 0.18 | 2 | 2 | 2 | tier3 | shared         | 0 |
| 3  | 117925746 | 116443056 | C | T | 1096 | 18 | 0.02 | 362 | 361 | 0.50 | 662 | 178 | 0.21 | 2 | 2 | 2 | tier3 | shared         | 1 |
| 3  | 118376358 | 116893668 | A | G | 495  | 6  | 0.01 | 110 | 123 | 0.53 | 296 | 68  | 0.19 | 2 | 2 | 2 | tier3 | shared         | 1 |
| 3  | 119101366 | 117618676 | G | A | 538  | 10 | 0.02 | 204 | 176 | 0.46 | 397 | 93  | 0.19 | 2 | 2 | 2 | tier3 | shared         | 1 |
| 3  | 12178231  | 12203231  | T | C | 773  | 12 | 0.02 | 476 | 340 | 0.42 | 552 | 117 | 0.17 | 2 | 2 | 2 | tier3 | shared         | 0 |
| 3  | 125738237 | 124255547 | G | A | 573  | 10 | 0.02 | 228 | 199 | 0.47 | 465 | 134 | 0.22 | 2 | 2 | 2 | tier3 | shared         | 1 |
| 3  | 127261201 | 125778511 | G | A | 729  | 18 | 0.02 | 385 | 312 | 0.45 | 512 | 115 | 0.18 | 2 | 2 | 2 | tier3 | shared         | 0 |
| 3  | 130212164 | 128729474 | C | T | 290  | 1  | 0.00 | 231 | 72  | 0.24 | 291 | 0   | 0.00 | 2 | 2 | 2 | tier3 | tumor-specific | 0 |
| 3  | 134126457 | 132643767 | C | T | 175  | 0  | 0.00 | 47  | 43  | 0.48 | 89  | 15  | 0.14 | 2 | 2 | 2 | tier3 | shared         | 1 |
| 3  | 141311794 | 139829104 | C | T | 812  | 7  | 0.01 | 358 | 312 | 0.47 | 733 | 166 | 0.18 | 2 | 2 | 2 | tier3 | shared         | 0 |
| 3  | 142302687 | 140819997 | - | C | 576  | 4  | 0.01 | 305 | 260 | 0.46 | 365 | 96  | 0.21 | 2 | 2 | 2 | tier3 | shared         | 0 |
| 3  | 149286574 | 147803884 | G | T | 547  | 2  | 0.00 | 95  | 49  | 0.34 | 358 | 82  | 0.19 | 2 | 2 | 2 | tier3 | shared         | 0 |
| 3  | 149292848 | 147810158 | C | A | 445  | 11 | 0.02 | 166 | 133 | 0.44 | 386 | 78  | 0.17 | 2 | 2 | 2 | tier3 | shared         | 0 |
| 3  | 1501179   | 1526179   | A | T | 720  | 11 | 0.02 | 273 | 215 | 0.44 | 456 | 116 | 0.20 | 2 | 2 | 2 | tier3 | shared         | 1 |
| 3  | 158822306 | 157339612 | G | A | 438  | 11 | 0.02 | 212 | 193 | 0.48 | 350 | 105 | 0.23 | 2 | 2 | 2 | tier3 | shared         | 0 |
| 3  | 159747211 | 158264517 | C | T | 964  | 10 | 0.01 | 364 | 327 | 0.47 | 619 | 147 | 0.19 | 2 | 2 | 2 | tier3 | shared         | 0 |
| 3  | 164377776 | 162895082 | G | A | 710  | 9  | 0.01 | 208 | 188 | 0.47 | 428 | 85  | 0.17 | 2 | 2 | 2 | tier3 | shared         | 0 |
| 3  | 164688095 | 163205401 | T | G | 516  | 7  | 0.01 | 142 | 131 | 0.48 | 350 | 92  | 0.21 | 2 | 2 | 2 | tier3 | shared         | 0 |
| 3  | 164995486 | 163512792 | C | T | 720  | 12 | 0.02 | 297 | 183 | 0.38 | 506 | 148 | 0.23 | 2 | 2 | 2 | tier3 | shared         | 1 |
| 3  | 167307898 | 165825204 | G | A | 646  | 11 | 0.02 | 210 | 168 | 0.44 | 388 | 91  | 0.19 | 2 | 2 | 2 | tier3 | shared         | 1 |
| 3  | 167420251 | 165937557 | C | T | 894  | 9  | 0.01 | 311 | 261 | 0.46 | 587 | 118 | 0.17 | 2 | 2 | 2 | tier3 | shared         | 0 |
| 3  | 167997880 | 166515186 | T | G | 205  | 6  | 0.03 | 49  | 47  | 0.49 | 105 | 33  | 0.24 | 2 | 2 | 2 | tier3 | shared         | 0 |
| 3  | 170003465 | 168520771 | C | T | 899  | 6  | 0.01 | 642 | 125 | 0.16 | 492 | 116 | 0.19 | 2 | 2 | 2 | tier1 | shared         | 0 |
| 3  | 170876894 | 169394200 | C | A | 872  | 8  | 0.01 | 342 | 291 | 0.46 | 526 | 113 | 0.18 | 2 | 2 | 2 | tier3 | shared         | 0 |
| 3  | 175311421 | 173828727 | C | A | 800  | 10 | 0.01 | 288 | 211 | 0.42 | 507 | 121 | 0.19 | 2 | 2 | 2 | tier2 | shared         | 0 |
| 3  | 177183210 | 175700516 | C | T | 614  | 5  | 0.01 | 192 | 131 | 0.41 | 339 | 83  | 0.20 | 2 | 2 | 2 | tier3 | shared         | 1 |
| 3  | 184874164 | 183391470 | T | C | 956  | 17 | 0.02 | 395 | 358 | 0.48 | 522 | 128 | 0.20 | 2 | 2 | 2 | tier3 | shared         | 0 |
| 3  | 186144885 | 184662191 | C | T | 585  | 14 | 0.02 | 272 | 233 | 0.46 | 389 | 92  | 0.19 | 2 | 2 | 2 | tier3 | shared         | 0 |

|   |           |           |   |   |     |    |      |     |     |      |     |     |      |   |   |   |       |                |   |
|---|-----------|-----------|---|---|-----|----|------|-----|-----|------|-----|-----|------|---|---|---|-------|----------------|---|
| 3 | 186776963 | 185294269 | C | T | 127 | 3  | 0.02 | 34  | 19  | 0.36 | 196 | 47  | 0.19 | 2 | 2 | 2 | tier3 | shared         | 0 |
| 3 | 187943981 | 186461287 | A | T | 939 | 9  | 0.01 | 424 | 294 | 0.41 | 612 | 177 | 0.22 | 2 | 2 | 2 | tier3 | shared         | 0 |
| 3 | 192086469 | 190603775 | A | T | 466 | 4  | 0.01 | 148 | 143 | 0.49 | 280 | 71  | 0.20 | 2 | 2 | 2 | tier3 | shared         | 0 |
| 3 | 192511916 | 191029222 | C | T | 673 | 11 | 0.02 | 308 | 268 | 0.47 | 403 | 87  | 0.18 | 2 | 2 | 2 | tier3 | shared         | 0 |
| 3 | 192676992 | 191194298 | C | A | 926 | 8  | 0.01 | 341 | 215 | 0.39 | 464 | 124 | 0.21 | 2 | 2 | 2 | tier3 | shared         | 0 |
| 3 | 193463531 | 191980837 | A | G | 470 | 6  | 0.01 | 158 | 144 | 0.48 | 345 | 75  | 0.18 | 2 | 2 | 2 | tier3 | shared         | 0 |
| 3 | 195575023 | 194093734 | C | T | 366 | 11 | 0.03 | 209 | 169 | 0.45 | 315 | 81  | 0.20 | 2 | 2 | 2 | tier3 | shared         | 1 |
| 3 | 2034970   | 2059970   | G | A | 727 | 1  | 0.00 | 472 | 72  | 0.13 | 419 | 107 | 0.20 | 2 | 2 | 2 | tier3 | shared         | 1 |
| 3 | 2078249   | 2103249   | C | T | 838 | 12 | 0.01 | 287 | 263 | 0.48 | 506 | 115 | 0.19 | 2 | 2 | 2 | tier3 | shared         | 0 |
| 3 | 21174762  | 21199758  | - | A | 555 | 10 | 0.02 | 252 | 221 | 0.47 | 421 | 105 | 0.20 | 2 | 2 | 2 | tier3 | shared         | 0 |
| 3 | 2244802   | 2269802   | T | A | 302 | 11 | 0.04 | 76  | 58  | 0.43 | 228 | 59  | 0.21 | 2 | 2 | 2 | tier2 | shared         | 0 |
| 3 | 25507680  | 25532676  | G | A | 408 | 9  | 0.02 | 152 | 135 | 0.47 | 331 | 68  | 0.17 | 2 | 2 | 2 | tier3 | shared         | 0 |
| 3 | 27052799  | 27077795  | C | A | 874 | 11 | 0.01 | 501 | 357 | 0.42 | 542 | 142 | 0.21 | 2 | 2 | 2 | tier3 | shared         | 1 |
| 3 | 2984885   | 3009885   | T | G | 808 | 16 | 0.02 | 357 | 277 | 0.44 | 477 | 118 | 0.20 | 2 | 2 | 2 | tier3 | shared         | 0 |
| 3 | 30365401  | 30390397  | C | T | 617 | 9  | 0.01 | 235 | 187 | 0.44 | 446 | 125 | 0.22 | 2 | 2 | 2 | tier3 | shared         | 0 |
| 3 | 36370530  | 36395526  | G | A | 671 | 8  | 0.01 | 327 | 237 | 0.42 | 528 | 143 | 0.21 | 2 | 2 | 2 | tier3 | shared         | 0 |
| 3 | 3679305   | 3704305   | A | G | 488 | 10 | 0.02 | 215 | 211 | 0.50 | 500 | 123 | 0.20 | 2 | 2 | 2 | tier3 | shared         | 0 |
| 3 | 38544147  | 38569143  | C | T | 574 | 8  | 0.01 | 313 | 253 | 0.45 | 484 | 117 | 0.19 | 2 | 2 | 2 | tier3 | shared         | 1 |
| 3 | 41780881  | 41805877  | T | A | 508 | 10 | 0.02 | 161 | 134 | 0.45 | 410 | 103 | 0.20 | 2 | 2 | 2 | tier3 | shared         | 1 |
| 3 | 45071520  | 45096516  | T | A | 934 | 13 | 0.01 | 289 | 274 | 0.49 | 530 | 131 | 0.20 | 2 | 2 | 2 | tier3 | shared         | 0 |
| 3 | 50268699  | 50293695  | G | A | 621 | 2  | 0.00 | 310 | 94  | 0.23 | 391 | 0   | 0.00 | 2 | 2 | 2 | tier1 | tumor-specific | 1 |
| 3 | 51728562  | 51753522  | T | A | 496 | 5  | 0.01 | 223 | 157 | 0.41 | 357 | 104 | 0.23 | 2 | 2 | 2 | tier2 | shared         | 0 |
| 3 | 53895898  | 53920858  | A | G | 545 | 5  | 0.01 | 199 | 138 | 0.41 | 347 | 75  | 0.18 | 2 | 2 | 2 | tier3 | shared         | 0 |
| 3 | 55215807  | 55240767  | A | G | 596 | 6  | 0.01 | 244 | 184 | 0.43 | 423 | 93  | 0.18 | 2 | 2 | 2 | tier3 | shared         | 1 |
| 3 | 5767652   | 5792652   | A | G | 687 | 11 | 0.02 | 296 | 224 | 0.43 | 559 | 137 | 0.20 | 2 | 2 | 2 | tier3 | shared         | 1 |
| 3 | 64994383  | 65019343  | G | C | 563 | 8  | 0.01 | 291 | 214 | 0.42 | 473 | 113 | 0.19 | 2 | 2 | 2 | tier2 | shared         | 1 |
| 3 | 65900914  | 65925874  | C | T | 578 | 9  | 0.02 | 300 | 270 | 0.47 | 443 | 91  | 0.17 | 2 | 2 | 2 | tier3 | shared         | 2 |
| 3 | 76036604  | 75953914  | G | T | 621 | 6  | 0.01 | 192 | 112 | 0.37 | 389 | 97  | 0.20 | 2 | 2 | 2 | tier3 | shared         | 2 |
| 3 | 77331179  | 77248489  | A | C | 593 | 13 | 0.02 | 336 | 247 | 0.42 | 420 | 123 | 0.23 | 2 | 2 | 2 | tier2 | shared         | 2 |
| 3 | 77729580  | 77646890  | G | T | 772 | 4  | 0.01 | 240 | 175 | 0.42 | 454 | 89  | 0.16 | 2 | 2 | 2 | tier3 | shared         | 2 |
| 3 | 77854450  | 77771760  | G | T | 991 | 11 | 0.01 | 358 | 303 | 0.46 | 568 | 152 | 0.21 | 2 | 2 | 2 | tier3 | shared         | 1 |
| 3 | 78065897  | 77983207  | A | G | 494 | 8  | 0.02 | 221 | 167 | 0.43 | 375 | 70  | 0.16 | 2 | 2 | 2 | tier3 | shared         | 1 |
| 3 | 78833219  | 78750529  | G | A | 960 | 24 | 0.02 | 280 | 251 | 0.47 | 570 | 140 | 0.20 | 2 | 2 | 2 | tier3 | shared         | 0 |
| 3 | 79042227  | 78959537  | C | T | 577 | 6  | 0.01 | 194 | 163 | 0.46 | 384 | 81  | 0.17 | 2 | 2 | 2 | tier3 | shared         | 0 |
| 3 | 79977138  | 79894448  | G | T | 433 | 4  | 0.01 | 109 | 96  | 0.47 | 314 | 55  | 0.15 | 2 | 2 | 2 | tier3 | shared         | 1 |
| 3 | 80089414  | 80006724  | C | A | 160 | 5  | 0.03 | 84  | 74  | 0.47 | 136 | 38  | 0.22 | 2 | 2 | 2 | tier2 | shared         | 1 |
| 3 | 80218392  | 80135702  | C | - | 353 | 8  | 0.02 | 75  | 73  | 0.49 | 234 | 63  | 0.21 | 2 | 2 | 2 | tier3 | shared         | 1 |
| 3 | 80560540  | 80477850  | T | G | 562 | 11 | 0.02 | 161 | 172 | 0.52 | 457 | 119 | 0.21 | 2 | 2 | 2 | tier3 | shared         | 1 |
| 3 | 8069738   | 8094738   | G | A | 585 | 8  | 0.01 | 249 | 177 | 0.42 | 283 | 72  | 0.20 | 2 | 2 | 2 | tier3 | shared         | 1 |
| 3 | 80989228  | 80906538  | T | A | 458 | 7  | 0.02 | 92  | 88  | 0.49 | 322 | 89  | 0.22 | 2 | 2 | 2 | tier3 | shared         | 1 |

|   |           |           |   |    |     |    |      |     |     |      |     |     |      |   |      |   |       |                  |   |
|---|-----------|-----------|---|----|-----|----|------|-----|-----|------|-----|-----|------|---|------|---|-------|------------------|---|
| 3 | 8111011   | 8136011   | G | A  | 768 | 15 | 0.02 | 332 | 257 | 0.44 | 529 | 136 | 0.20 | 2 | 2    | 2 | tier3 | shared           | 1 |
| 3 | 82551753  | 82469063  | G | A  | 577 | 10 | 0.02 | 196 | 119 | 0.38 | 479 | 118 | 0.20 | 2 | 2    | 2 | tier3 | shared           | 1 |
| 3 | 83059588  | 82976898  | G | A  | 773 | 10 | 0.01 | 345 | 282 | 0.45 | 652 | 139 | 0.18 | 2 | 2    | 2 | tier2 | shared           | 1 |
| 3 | 85162026  | 85079336  | C | T  | 601 | 2  | 0.00 | 433 | 100 | 0.19 | 389 | 104 | 0.21 | 2 | 2    | 2 | tier3 | shared           | 2 |
| 3 | 88866317  | 88783627  | T | -  | 727 | 7  | 0.01 | 234 | 217 | 0.48 | 417 | 106 | 0.20 | 2 | 2    | 2 | tier3 | shared           | 1 |
| 3 | 89935385  | 89852695  | G | A  | 685 | 9  | 0.01 | 204 | 134 | 0.40 | 509 | 135 | 0.21 | 2 | 2    | 2 | tier3 | shared           | 1 |
| 3 | 96666103  | 95183413  | G | A  | 791 | 12 | 0.01 | 278 | 253 | 0.48 | 468 | 95  | 0.17 | 2 | 2    | 2 | tier3 | shared           | 1 |
| 3 | 96784077  | 95301387  | T | C  | 751 | 9  | 0.01 | 254 | 218 | 0.46 | 512 | 131 | 0.20 | 2 | 2    | 2 | tier2 | shared           | 1 |
| 3 | 97215967  | 95733277  | A | G  | 656 | 8  | 0.01 | 246 | 177 | 0.42 | 460 | 97  | 0.17 | 2 | 2    | 2 | tier3 | shared           | 1 |
| 3 | 9761731   | 9786731   | T | C  | 492 | 8  | 0.02 | 282 | 223 | 0.44 | 355 | 82  | 0.19 | 2 | 2    | 2 | tier1 | shared           | 1 |
| 3 | 97893567  | 96410877  | G | A  | 669 | 12 | 0.02 | 212 | 151 | 0.42 | 457 | 105 | 0.19 | 2 | 2    | 2 | tier3 | shared           | 0 |
| 3 | 98446452  | 96963762  | T | A  | 450 | 6  | 0.01 | 203 | 41  | 0.17 | 342 | 90  | 0.21 | 2 | 2    | 2 | tier3 | shared           | 0 |
| 3 | 98606525  | 97123835  | G | A  | 949 | 7  | 0.01 | 344 | 300 | 0.47 | 735 | 154 | 0.17 | 2 | 2    | 2 | tier3 | shared           | 0 |
| 4 | 106092739 | 105873290 | T | -  | 383 | 16 | 0.04 | 90  | 86  | 0.49 | 368 | 104 | 0.22 | 2 | 2    | 2 | tier3 | shared           | 0 |
| 4 | 12084534  | 12475436  | A | G  | 775 | 11 | 0.01 | 299 | 216 | 0.42 | 627 | 175 | 0.22 | 2 | 2    | 2 | tier3 | shared           | 1 |
| 4 | 120921013 | 120701565 | T | G  | 812 | 4  | 0.00 | 365 | 235 | 0.39 | 566 | 146 | 0.21 | 2 | 2    | 2 | tier3 | shared           | 1 |
| 4 | 12107182  | 12498084  | C | A  | 542 | 3  | 0.01 | 236 | 210 | 0.47 | 405 | 92  | 0.19 | 2 | 2    | 2 | tier3 | shared           | 1 |
| 4 | 121285570 | 121066122 | G | A  | 821 | 15 | 0.02 | 367 | 301 | 0.45 | 567 | 174 | 0.23 | 2 | 2    | 2 | tier3 | shared           | 0 |
| 4 | 125600762 | 125381312 | G | A  | 725 | 3  | 0.00 | 564 | 59  | 0.09 | 408 | 120 | 0.23 | 2 | 2    | 2 | tier3 | shared           | 0 |
| 4 | 126588250 | 126368800 | C | T  | 470 | 9  | 0.02 | 137 | 93  | 0.40 | 300 | 69  | 0.19 | 2 | 2    | 2 | tier3 | shared           | 1 |
| 4 | 126893935 | 126674485 | C | T  | 401 | 5  | 0.01 | 94  | 84  | 0.47 | 278 | 59  | 0.18 | 2 | 2    | 2 | tier3 | shared           | 1 |
| 4 | 127516900 | 127297450 | C | A  | 694 | 10 | 0.01 | 295 | 263 | 0.47 | 438 | 144 | 0.25 | 2 | 2    | 2 | tier2 | shared           | 1 |
| 4 | 130454747 | 130235297 | G | A  | 930 | 13 | 0.01 | 371 | 349 | 0.48 | 682 | 140 | 0.17 | 2 | 2    | 2 | tier3 | shared           | 1 |
| 4 | 130541766 | 130322316 | C | T  | 709 | 3  | 0.00 | 449 | 79  | 0.15 | 519 | 138 | 0.21 | 2 | 2    | 2 | tier3 | shared           | 1 |
| 4 | 133038147 | 132818697 | G | A  | 536 | 5  | 0.01 | 190 | 165 | 0.46 | 356 | 80  | 0.18 | 2 | 1.06 | 2 | tier3 | shared           | 0 |
| 4 | 137108969 | 136889519 | C | A  | 445 | 8  | 0.02 | 133 | 86  | 0.39 | 363 | 89  | 0.20 | 2 | 2    | 2 | tier3 | shared           | 0 |
| 4 | 137637510 | 137418060 | A | -  | 372 | 9  | 0.02 | 133 | 88  | 0.40 | 281 | 67  | 0.19 | 2 | 2    | 2 | tier3 | shared           | 1 |
| 4 | 142258827 | 142039377 | G | T  | 648 | 5  | 0.01 | 339 | 263 | 0.44 | 349 | 82  | 0.19 | 2 | 2    | 2 | tier3 | shared           | 0 |
| 4 | 142853353 | 142633903 | T | A  | 347 | 0  | 0.00 | 147 | 0   | 0.00 | 256 | 72  | 0.22 | 2 | 2    | 2 | tier3 | relapse-specific | 0 |
| 4 | 14954202  | 15345104  | G | T  | 665 | 7  | 0.01 | 292 | 210 | 0.42 | 463 | 133 | 0.22 | 2 | 2    | 2 | tier3 | shared           | 0 |
| 4 | 152840379 | 152620929 | - | AC | 608 | 7  | 0.01 | 302 | 165 | 0.35 | 378 | 59  | 0.14 | 2 | 2    | 2 | tier3 | shared           | 0 |
| 4 | 152868972 | 152649522 | A | G  | 911 | 9  | 0.01 | 289 | 246 | 0.46 | 524 | 175 | 0.25 | 2 | 2    | 2 | tier3 | shared           | 0 |
| 4 | 154334476 | 154115026 | C | T  | 591 | 5  | 0.01 | 254 | 184 | 0.42 | 303 | 85  | 0.22 | 2 | 2    | 2 | tier3 | shared           | 0 |
| 4 | 162690344 | 162470894 | T | C  | 823 | 14 | 0.02 | 304 | 246 | 0.45 | 509 | 130 | 0.20 | 2 | 2    | 2 | tier3 | shared           | 0 |
| 4 | 163264471 | 163045021 | A | -  | 364 | 17 | 0.04 | 122 | 85  | 0.41 | 225 | 55  | 0.20 | 2 | 2    | 2 | tier3 | shared           | 0 |
| 4 | 166070056 | 165850606 | C | A  | 586 | 8  | 0.01 | 289 | 231 | 0.44 | 364 | 79  | 0.18 | 2 | 2    | 2 | tier3 | shared           | 0 |
| 4 | 167015901 | 166796451 | G | T  | 526 | 7  | 0.01 | 235 | 205 | 0.47 | 370 | 98  | 0.21 | 2 | 2    | 2 | tier2 | shared           | 0 |
| 4 | 168415185 | 168178610 | C | T  | 876 | 11 | 0.01 | 249 | 173 | 0.41 | 441 | 99  | 0.18 | 2 | 2    | 2 | tier3 | shared           | 0 |
| 4 | 168629207 | 168392632 | C | T  | 712 | 3  | 0.00 | 360 | 114 | 0.24 | 684 | 0   | 0.00 | 2 | 2    | 2 | tier3 | tumor-specific   | 1 |
| 4 | 173920794 | 173684219 | C | T  | 948 | 10 | 0.01 | 382 | 294 | 0.43 | 489 | 145 | 0.23 | 2 | 2    | 2 | tier3 | shared           | 1 |

|   |           |           |   |   |      |    |      |     |     |      |     |     |      |   |   |   |       |                |   |
|---|-----------|-----------|---|---|------|----|------|-----|-----|------|-----|-----|------|---|---|---|-------|----------------|---|
| 4 | 174728239 | 174491664 | C | A | 480  | 9  | 0.02 | 263 | 224 | 0.46 | 407 | 96  | 0.19 | 2 | 2 | 2 | tier3 | shared         | 0 |
| 4 | 176729323 | 176492329 | G | T | 574  | 3  | 0.01 | 291 | 87  | 0.23 | 466 | 0   | 0.00 | 2 | 2 | 2 | tier3 | tumor-specific | 1 |
| 4 | 179697612 | 179460618 | T | C | 1048 | 18 | 0.02 | 373 | 321 | 0.46 | 651 | 155 | 0.19 | 2 | 2 | 2 | tier3 | shared         | 1 |
| 4 | 182026988 | 181789994 | C | T | 956  | 8  | 0.01 | 319 | 191 | 0.37 | 608 | 147 | 0.19 | 2 | 2 | 2 | tier3 | shared         | 1 |
| 4 | 182229752 | 181992758 | C | T | 528  | 1  | 0.00 | 175 | 103 | 0.37 | 382 | 85  | 0.18 | 2 | 2 | 2 | tier3 | shared         | 0 |
| 4 | 182348378 | 182111384 | C | G | 687  | 4  | 0.01 | 244 | 184 | 0.43 | 496 | 115 | 0.19 | 2 | 2 | 2 | tier2 | shared         | 0 |
| 4 | 182597952 | 182360958 | T | - | 734  | 2  | 0.00 | 331 | 97  | 0.23 | 614 | 2   | 0.00 | 2 | 2 | 2 | tier3 | tumor-specific | 1 |
| 4 | 18285640  | 18676542  | C | T | 781  | 5  | 0.01 | 404 | 278 | 0.41 | 570 | 139 | 0.20 | 2 | 2 | 2 | tier3 | shared         | 1 |
| 4 | 183462889 | 183225895 | G | A | 806  | 20 | 0.02 | 378 | 314 | 0.45 | 502 | 117 | 0.19 | 2 | 2 | 2 | tier3 | shared         | 2 |
| 4 | 183488821 | 183251827 | C | T | 619  | 9  | 0.01 | 331 | 275 | 0.45 | 474 | 100 | 0.17 | 2 | 2 | 2 | tier2 | shared         | 2 |
| 4 | 183981898 | 183744904 | - | T | 959  | 14 | 0.01 | 368 | 308 | 0.46 | 599 | 162 | 0.21 | 2 | 2 | 2 | tier3 | shared         | 0 |
| 4 | 186118876 | 185881882 | C | T | 561  | 3  | 0.01 | 355 | 123 | 0.26 | 528 | 1   | 0.00 | 2 | 2 | 2 | tier3 | tumor-specific | 0 |
| 4 | 186649789 | 186412795 | C | T | 610  | 5  | 0.01 | 274 | 285 | 0.51 | 376 | 126 | 0.25 | 2 | 2 | 2 | tier3 | shared         | 0 |
| 4 | 18683902  | 19074804  | C | T | 743  | 12 | 0.02 | 324 | 273 | 0.46 | 587 | 155 | 0.21 | 2 | 2 | 2 | tier3 | shared         | 1 |
| 4 | 187679838 | 187442844 | T | C | 992  | 11 | 0.01 | 311 | 239 | 0.43 | 608 | 192 | 0.24 | 2 | 2 | 2 | tier3 | shared         | 0 |
| 4 | 187885961 | 187648967 | G | A | 901  | 19 | 0.02 | 479 | 378 | 0.44 | 659 | 153 | 0.19 | 2 | 2 | 2 | tier3 | shared         | 3 |
| 4 | 187925810 | 187688816 | C | T | 450  | 7  | 0.02 | 256 | 199 | 0.44 | 397 | 95  | 0.19 | 2 | 2 | 2 | tier3 | shared         | 3 |
| 4 | 188198245 | 187961251 | T | C | 499  | 2  | 0.00 | 267 | 256 | 0.49 | 375 | 127 | 0.25 | 2 | 2 | 2 | tier3 | shared         | 1 |
| 4 | 188687167 | 188450173 | - | A | 629  | 6  | 0.01 | 176 | 112 | 0.39 | 457 | 105 | 0.19 | 2 | 2 | 2 | tier3 | shared         | 1 |
| 4 | 189159937 | 188922943 | G | A | 633  | 2  | 0.00 | 296 | 237 | 0.44 | 502 | 130 | 0.21 | 2 | 2 | 2 | tier3 | shared         | 1 |
| 4 | 18920367  | 19311269  | G | A | 838  | 10 | 0.01 | 379 | 322 | 0.46 | 584 | 126 | 0.18 | 2 | 2 | 2 | tier2 | shared         | 1 |
| 4 | 189400871 | 189163877 | G | A | 543  | 5  | 0.01 | 302 | 214 | 0.41 | 395 | 87  | 0.18 | 2 | 2 | 2 | tier3 | shared         | 1 |
| 4 | 189441137 | 189204143 | C | T | 490  | 12 | 0.02 | 247 | 234 | 0.49 | 336 | 76  | 0.18 | 2 | 2 | 2 | tier2 | shared         | 1 |
| 4 | 19193052  | 19583954  | C | T | 496  | 3  | 0.01 | 152 | 130 | 0.46 | 284 | 75  | 0.21 | 2 | 2 | 2 | tier3 | shared         | 1 |
| 4 | 196944    | 206944    | C | T | 413  | 5  | 0.01 | 158 | 140 | 0.47 | 185 | 51  | 0.22 | 2 | 2 | 2 | tier2 | shared         | 0 |
| 4 | 19864204  | 20255106  | C | T | 541  | 5  | 0.01 | 255 | 224 | 0.47 | 373 | 115 | 0.24 | 2 | 2 | 2 | tier2 | shared         | 1 |
| 4 | 19876182  | 20267084  | G | A | 771  | 16 | 0.02 | 270 | 222 | 0.45 | 531 | 132 | 0.20 | 2 | 2 | 2 | tier3 | shared         | 1 |
| 4 | 2044468   | 2074670   | C | T | 429  | 7  | 0.02 | 281 | 234 | 0.45 | 329 | 82  | 0.20 | 2 | 2 | 2 | tier3 | shared         | 0 |
| 4 | 20516603  | 20907505  | C | T | 593  | 6  | 0.01 | 154 | 109 | 0.41 | 286 | 75  | 0.21 | 2 | 2 | 2 | tier3 | shared         | 0 |
| 4 | 21110916  | 21501818  | G | A | 624  | 6  | 0.01 | 189 | 163 | 0.46 | 308 | 79  | 0.20 | 2 | 2 | 2 | tier3 | shared         | 0 |
| 4 | 21119183  | 21510085  | T | G | 758  | 11 | 0.01 | 360 | 299 | 0.45 | 593 | 172 | 0.22 | 2 | 2 | 2 | tier3 | shared         | 0 |
| 4 | 21319658  | 21710560  | C | T | 451  | 4  | 0.01 | 209 | 35  | 0.14 | 377 | 94  | 0.20 | 2 | 2 | 2 | tier3 | shared         | 0 |
| 4 | 23632204  | 24023106  | C | A | 1026 | 11 | 0.01 | 414 | 358 | 0.46 | 667 | 136 | 0.17 | 2 | 2 | 2 | tier3 | shared         | 1 |
| 4 | 23750349  | 24141251  | C | T | 849  | 14 | 0.02 | 388 | 272 | 0.41 | 470 | 119 | 0.20 | 2 | 2 | 2 | tier3 | shared         | 1 |
| 4 | 27195937  | 27586839  | G | A | 368  | 4  | 0.01 | 131 | 113 | 0.46 | 222 | 50  | 0.18 | 2 | 2 | 2 | tier2 | shared         | 0 |
| 4 | 27578426  | 27969328  | T | A | 753  | 11 | 0.01 | 383 | 87  | 0.19 | 421 | 100 | 0.19 | 2 | 2 | 2 | tier3 | shared         | 1 |
| 4 | 28561760  | 28952662  | C | G | 714  | 11 | 0.02 | 263 | 201 | 0.43 | 545 | 118 | 0.18 | 2 | 2 | 2 | tier3 | shared         | 1 |
| 4 | 28906848  | 29297750  | C | T | 758  | 8  | 0.01 | 295 | 217 | 0.42 | 516 | 135 | 0.21 | 2 | 2 | 2 | tier3 | shared         | 1 |
| 4 | 28960008  | 29350910  | C | T | 437  | 7  | 0.02 | 134 | 94  | 0.41 | 240 | 59  | 0.20 | 2 | 2 | 2 | tier3 | shared         | 1 |
| 4 | 29105232  | 29496134  | C | G | 425  | 5  | 0.01 | 117 | 65  | 0.36 | 352 | 67  | 0.16 | 2 | 2 | 2 | tier3 | shared         | 0 |

|   |           |           |   |   |      |    |      |     |     |      |     |     |      |   |   |   |       |                |   |
|---|-----------|-----------|---|---|------|----|------|-----|-----|------|-----|-----|------|---|---|---|-------|----------------|---|
| 4 | 29107730  | 29498632  | - | T | 395  | 7  | 0.02 | 181 | 119 | 0.40 | 304 | 51  | 0.14 | 2 | 2 | 2 | tier3 | shared         | 0 |
| 4 | 30563192  | 30954094  | A | - | 452  | 17 | 0.04 | 157 | 112 | 0.42 | 238 | 74  | 0.24 | 2 | 2 | 2 | tier3 | shared         | 0 |
| 4 | 30653089  | 31043991  | C | T | 706  | 11 | 0.02 | 274 | 195 | 0.42 | 503 | 136 | 0.21 | 2 | 2 | 2 | tier3 | shared         | 0 |
| 4 | 30712415  | 31103317  | G | T | 862  | 7  | 0.01 | 325 | 281 | 0.46 | 569 | 123 | 0.18 | 2 | 2 | 2 | tier3 | shared         | 0 |
| 4 | 30729745  | 31120647  | T | - | 678  | 23 | 0.03 | 212 | 188 | 0.47 | 500 | 133 | 0.21 | 2 | 2 | 2 | tier3 | shared         | 0 |
| 4 | 30764036  | 31154938  | A | C | 838  | 8  | 0.01 | 358 | 281 | 0.44 | 580 | 133 | 0.19 | 2 | 2 | 2 | tier3 | shared         | 0 |
| 4 | 31298402  | 31689304  | A | C | 791  | 7  | 0.01 | 343 | 286 | 0.45 | 493 | 99  | 0.17 | 2 | 2 | 2 | tier3 | shared         | 1 |
| 4 | 31827243  | 32183345  | G | A | 542  | 5  | 0.01 | 185 | 169 | 0.48 | 429 | 112 | 0.21 | 2 | 2 | 2 | tier3 | shared         | 0 |
| 4 | 32781093  | 33104698  | A | C | 773  | 16 | 0.02 | 256 | 215 | 0.46 | 550 | 134 | 0.20 | 2 | 2 | 2 | tier3 | shared         | 1 |
| 4 | 35250271  | 35573876  | G | A | 669  | 9  | 0.01 | 235 | 166 | 0.41 | 464 | 111 | 0.19 | 2 | 2 | 2 | tier2 | shared         | 1 |
| 4 | 35471130  | 35794735  | A | G | 721  | 10 | 0.01 | 289 | 229 | 0.44 | 511 | 137 | 0.21 | 2 | 2 | 2 | tier3 | shared         | 1 |
| 4 | 36530355  | 36853960  | C | T | 1003 | 6  | 0.01 | 760 | 64  | 0.08 | 583 | 163 | 0.22 | 2 | 2 | 2 | tier3 | shared         | 1 |
| 4 | 36730979  | 37054584  | T | C | 635  | 13 | 0.02 | 298 | 297 | 0.50 | 416 | 97  | 0.19 | 2 | 2 | 2 | tier3 | shared         | 1 |
| 4 | 37062353  | 37385958  | C | T | 865  | 8  | 0.01 | 368 | 347 | 0.49 | 687 | 170 | 0.20 | 2 | 2 | 2 | tier3 | shared         | 0 |
| 4 | 37856847  | 38180452  | G | T | 973  | 9  | 0.01 | 415 | 331 | 0.44 | 556 | 147 | 0.21 | 2 | 2 | 2 | tier3 | shared         | 0 |
| 4 | 41866526  | 42171769  | G | A | 781  | 18 | 0.02 | 406 | 327 | 0.45 | 516 | 124 | 0.19 | 2 | 2 | 2 | tier3 | shared         | 0 |
| 4 | 45360745  | 45665988  | C | A | 553  | 4  | 0.01 | 258 | 230 | 0.47 | 419 | 101 | 0.19 | 2 | 2 | 2 | tier3 | shared         | 1 |
| 4 | 53509282  | 53814525  | G | A | 774  | 14 | 0.02 | 337 | 261 | 0.44 | 400 | 91  | 0.19 | 2 | 2 | 2 | tier2 | shared         | 0 |
| 4 | 56396856  | 56702099  | G | A | 683  | 6  | 0.01 | 295 | 232 | 0.44 | 516 | 115 | 0.18 | 2 | 2 | 2 | tier3 | shared         | 0 |
| 4 | 58046630  | 58351873  | C | T | 552  | 6  | 0.01 | 381 | 146 | 0.28 | 407 | 0   | 0.00 | 2 | 2 | 2 | tier3 | tumor-specific | 0 |
| 4 | 59003521  | 59308764  | C | A | 352  | 2  | 0.01 | 135 | 28  | 0.17 | 336 | 0   | 0.00 | 2 | 2 | 2 | tier3 | tumor-specific | 1 |
| 4 | 59753060  | 60070465  | C | T | 789  | 11 | 0.01 | 304 | 278 | 0.48 | 575 | 122 | 0.18 | 2 | 2 | 2 | tier2 | shared         | 1 |
| 4 | 63048485  | 63365890  | C | A | 628  | 6  | 0.01 | 213 | 148 | 0.41 | 399 | 107 | 0.21 | 2 | 2 | 2 | tier3 | shared         | 1 |
| 4 | 63365101  | 63682506  | C | T | 123  | 0  | 0.00 | 42  | 47  | 0.53 | 85  | 23  | 0.21 | 2 | 2 | 2 | tier2 | shared         | 0 |
| 4 | 63845241  | 64162646  | C | G | 454  | 2  | 0.00 | 140 | 135 | 0.49 | 343 | 91  | 0.21 | 2 | 2 | 2 | tier3 | shared         | 1 |
| 4 | 65524263  | 65841668  | G | A | 841  | 13 | 0.02 | 305 | 253 | 0.45 | 500 | 121 | 0.19 | 2 | 2 | 2 | tier3 | shared         | 1 |
| 4 | 66607172  | 66924577  | A | - | 503  | 7  | 0.01 | 179 | 135 | 0.43 | 357 | 112 | 0.24 | 2 | 2 | 2 | tier3 | shared         | 0 |
| 4 | 66875415  | 67192820  | G | C | 770  | 9  | 0.01 | 263 | 216 | 0.45 | 540 | 114 | 0.17 | 2 | 2 | 2 | tier3 | shared         | 1 |
| 4 | 69928008  | 69893419  | T | C | 843  | 7  | 0.01 | 308 | 271 | 0.47 | 495 | 110 | 0.18 | 2 | 2 | 2 | tier3 | shared         | 0 |
| 4 | 70511151  | 70476562  | A | G | 689  | 9  | 0.01 | 242 | 213 | 0.47 | 430 | 109 | 0.20 | 2 | 2 | 2 | tier3 | shared         | 0 |
| 4 | 71747205  | 71528341  | C | T | 719  | 2  | 0.00 | 292 | 46  | 0.14 | 537 | 114 | 0.18 | 2 | 2 | 2 | tier3 | shared         | 0 |
| 4 | 76450527  | 76231503  | T | - | 601  | 49 | 0.08 | 258 | 224 | 0.46 | 420 | 123 | 0.23 | 2 | 2 | 2 | tier3 | shared         | 0 |
| 4 | 80251211  | 80032187  | T | - | 327  | 5  | 0.02 | 76  | 56  | 0.42 | 270 | 56  | 0.17 | 2 | 2 | 2 | tier3 | shared         | 1 |
| 4 | 80339543  | 80120519  | C | T | 764  | 12 | 0.02 | 291 | 295 | 0.50 | 504 | 97  | 0.16 | 2 | 2 | 2 | tier2 | shared         | 1 |
| 4 | 80829340  | 80610316  | T | C | 390  | 4  | 0.01 | 124 | 101 | 0.45 | 311 | 85  | 0.21 | 2 | 2 | 2 | tier3 | shared         | 1 |
| 4 | 87781430  | 87562406  | G | A | 250  | 4  | 0.02 | 95  | 129 | 0.58 | 175 | 65  | 0.27 | 2 | 2 | 2 | tier3 | shared         | 0 |
| 4 | 94206628  | 93987605  | C | T | 775  | 9  | 0.01 | 299 | 259 | 0.46 | 583 | 165 | 0.22 | 2 | 2 | 2 | tier3 | shared         | 0 |
| 4 | 95615408  | 95396385  | T | C | 328  | 5  | 0.02 | 100 | 102 | 0.50 | 286 | 75  | 0.21 | 2 | 2 | 2 | tier3 | shared         | 0 |
| 5 | 100265461 | 100237562 | T | A | 586  | 19 | 0.03 | 488 | 99  | 0.17 | 446 | 121 | 0.21 | 2 | 2 | 2 | tier3 | shared         | 1 |
| 5 | 104006486 | 103978587 | G | A | 472  | 3  | 0.01 | 142 | 83  | 0.37 | 320 | 49  | 0.13 | 2 | 2 | 2 | tier3 | shared         | 1 |

|   |           |           |   |     |      |    |      |     |     |      |     |     |      |   |   |   |       |                |   |
|---|-----------|-----------|---|-----|------|----|------|-----|-----|------|-----|-----|------|---|---|---|-------|----------------|---|
| 5 | 107201359 | 107173460 | T | C   | 553  | 16 | 0.03 | 358 | 225 | 0.39 | 417 | 95  | 0.19 | 2 | 2 | 2 | tier3 | shared         | 0 |
| 5 | 11221977  | 11168977  | C | T   | 817  | 10 | 0.01 | 308 | 248 | 0.45 | 480 | 135 | 0.22 | 2 | 2 | 2 | tier3 | shared         | 0 |
| 5 | 116352856 | 116324957 | C | G   | 939  | 15 | 0.02 | 368 | 301 | 0.45 | 617 | 142 | 0.19 | 2 | 2 | 2 | tier3 | shared         | 1 |
| 5 | 117154709 | 117126810 | T | C   | 935  | 10 | 0.01 | 344 | 303 | 0.47 | 595 | 149 | 0.20 | 2 | 2 | 2 | tier3 | shared         | 0 |
| 5 | 117806828 | 117778929 | C | T   | 901  | 9  | 0.01 | 300 | 222 | 0.43 | 472 | 111 | 0.19 | 2 | 2 | 2 | tier3 | shared         | 1 |
| 5 | 122462602 | 122434703 | C | T   | 223  | 3  | 0.01 | 81  | 79  | 0.49 | 139 | 38  | 0.21 | 2 | 2 | 2 | tier2 | shared         | 0 |
| 5 | 123606437 | 123578538 | T | C   | 583  | 7  | 0.01 | 256 | 224 | 0.47 | 442 | 110 | 0.20 | 2 | 2 | 2 | tier3 | shared         | 0 |
| 5 | 124421179 | 124393280 | C | T   | 723  | 12 | 0.02 | 251 | 205 | 0.45 | 505 | 142 | 0.22 | 2 | 2 | 2 | tier3 | shared         | 1 |
| 5 | 127001815 | 126973916 | C | T   | 1048 | 19 | 0.02 | 473 | 392 | 0.45 | 591 | 148 | 0.20 | 2 | 2 | 2 | tier3 | shared         | 0 |
| 5 | 127934833 | 127906934 | C | T   | 1001 | 18 | 0.02 | 340 | 313 | 0.48 | 574 | 166 | 0.22 | 2 | 2 | 2 | tier2 | shared         | 1 |
| 5 | 128331328 | 128303429 | C | A   | 244  | 0  | 0.00 | 111 | 19  | 0.15 | 332 | 95  | 0.22 | 2 | 2 | 2 | tier3 | shared         | 1 |
| 5 | 1283613   | 1230613   | C | T   | 505  | 9  | 0.02 | 285 | 255 | 0.47 | 338 | 86  | 0.20 | 2 | 2 | 2 | tier3 | shared         | 0 |
| 5 | 129733200 | 129705301 | - | A   | 662  | 5  | 0.01 | 236 | 179 | 0.43 | 482 | 137 | 0.22 | 2 | 2 | 2 | tier3 | shared         | 1 |
| 5 | 133794553 | 133766654 | A | T   | 706  | 7  | 0.01 | 252 | 225 | 0.47 | 575 | 130 | 0.18 | 2 | 2 | 2 | tier2 | shared         | 0 |
| 5 | 138778650 | 138750751 | C | G   | 681  | 11 | 0.02 | 293 | 218 | 0.43 | 503 | 101 | 0.17 | 2 | 2 | 2 | tier3 | shared         | 0 |
| 5 | 1410892   | 1357892   | G | A   | 518  | 9  | 0.02 | 272 | 260 | 0.49 | 345 | 92  | 0.21 | 2 | 2 | 2 | tier3 | shared         | 0 |
| 5 | 141578573 | 141598389 | T | A   | 522  | 1  | 0.00 | 379 | 103 | 0.21 | 399 | 0   | 0.00 | 2 | 2 | 2 | tier3 | tumor-specific | 1 |
| 5 | 143554034 | 143573841 | G | T   | 1024 | 5  | 0.00 | 600 | 179 | 0.23 | 734 | 0   | 0.00 | 2 | 2 | 2 | tier3 | tumor-specific | 0 |
| 5 | 145689874 | 145709681 | C | T   | 903  | 14 | 0.02 | 395 | 285 | 0.42 | 652 | 162 | 0.20 | 2 | 2 | 2 | tier3 | shared         | 0 |
| 5 | 1482894   | 1429894   | C | A   | 535  | 15 | 0.03 | 258 | 214 | 0.45 | 293 | 91  | 0.24 | 2 | 2 | 2 | tier3 | shared         | 0 |
| 5 | 149344538 | 149364345 | - | CCC | 800  | 9  | 0.01 | 470 | 102 | 0.18 | 675 | 60  | 0.08 | 2 | 2 | 2 | tier3 | shared         | 1 |
| 5 | 149761862 | 149781669 | G | A   | 675  | 18 | 0.03 | 317 | 276 | 0.47 | 365 | 77  | 0.17 | 2 | 2 | 2 | tier3 | shared         | 1 |
| 5 | 151415323 | 151435130 | G | A   | 452  | 8  | 0.02 | 277 | 215 | 0.44 | 300 | 79  | 0.21 | 2 | 2 | 2 | tier3 | shared         | 1 |
| 5 | 15521544  | 15468544  | T | -   | 723  | 16 | 0.02 | 217 | 154 | 0.42 | 395 | 104 | 0.21 | 2 | 2 | 2 | tier2 | shared         | 1 |
| 5 | 156250002 | 156317424 | G | A   | 1118 | 14 | 0.01 | 444 | 425 | 0.49 | 643 | 212 | 0.25 | 2 | 2 | 2 | tier3 | shared         | 0 |
| 5 | 157119862 | 157187284 | G | A   | 682  | 2  | 0.00 | 401 | 105 | 0.21 | 657 | 0   | 0.00 | 2 | 2 | 2 | tier3 | tumor-specific | 0 |
| 5 | 159213503 | 159280925 | C | T   | 486  | 8  | 0.02 | 192 | 126 | 0.40 | 377 | 85  | 0.18 | 2 | 2 | 2 | tier3 | shared         | 1 |
| 5 | 16072497  | 16019497  | C | A   | 373  | 10 | 0.03 | 164 | 163 | 0.50 | 315 | 69  | 0.18 | 2 | 2 | 2 | tier3 | shared         | 0 |
| 5 | 163315359 | 163382781 | C | T   | 298  | 4  | 0.01 | 96  | 87  | 0.48 | 212 | 54  | 0.20 | 2 | 2 | 2 | tier2 | shared         | 1 |
| 5 | 165252124 | 165319546 | A | G   | 721  | 10 | 0.01 | 309 | 283 | 0.48 | 397 | 103 | 0.21 | 2 | 2 | 2 | tier3 | shared         | 1 |
| 5 | 166441782 | 166509204 | C | T   | 863  | 11 | 0.01 | 284 | 241 | 0.46 | 683 | 162 | 0.19 | 2 | 2 | 2 | tier3 | shared         | 1 |
| 5 | 166898714 | 166966136 | A | T   | 1000 | 12 | 0.01 | 337 | 313 | 0.48 | 604 | 130 | 0.18 | 2 | 2 | 2 | tier2 | shared         | 1 |
| 5 | 167178479 | 167245901 | C | T   | 647  | 7  | 0.01 | 363 | 276 | 0.43 | 427 | 109 | 0.20 | 2 | 2 | 2 | tier3 | shared         | 1 |
| 5 | 171987112 | 172054507 | G | A   | 867  | 11 | 0.01 | 362 | 309 | 0.46 | 433 | 114 | 0.21 | 2 | 2 | 2 | tier3 | shared         | 0 |
| 5 | 172597106 | 172664500 | C | T   | 496  | 9  | 0.02 | 214 | 158 | 0.42 | 337 | 87  | 0.21 | 2 | 2 | 2 | tier2 | shared         | 0 |
| 5 | 176460736 | 176528130 | G | A   | 344  | 7  | 0.02 | 144 | 114 | 0.44 | 231 | 65  | 0.22 | 2 | 2 | 2 | tier3 | shared         | 0 |
| 5 | 19662222  | 19626465  | C | T   | 1021 | 17 | 0.02 | 322 | 327 | 0.50 | 568 | 127 | 0.18 | 2 | 2 | 2 | tier3 | shared         | 0 |
| 5 | 20266446  | 20230689  | G | A   | 608  | 10 | 0.02 | 223 | 171 | 0.43 | 512 | 115 | 0.18 | 2 | 2 | 2 | tier3 | shared         | 1 |
| 5 | 20612321  | 20576564  | T | A   | 534  | 12 | 0.02 | 182 | 154 | 0.46 | 356 | 88  | 0.20 | 2 | 2 | 2 | tier3 | shared         | 1 |
| 5 | 23016236  | 22980479  | T | G   | 938  | 9  | 0.01 | 400 | 315 | 0.44 | 677 | 177 | 0.21 | 2 | 2 | 2 | tier3 | shared         | 1 |



|   |           |           |   |   |     |    |      |     |     |      |     |     |      |   |   |   |       |        |   |
|---|-----------|-----------|---|---|-----|----|------|-----|-----|------|-----|-----|------|---|---|---|-------|--------|---|
| 5 | 24634237  | 24598480  | G | C | 776 | 8  | 0.01 | 242 | 164 | 0.40 | 402 | 114 | 0.22 | 2 | 2 | 2 | tier3 | shared | 0 |
| 5 | 26191116  | 26155359  | T | C | 438 | 6  | 0.01 | 118 | 95  | 0.45 | 317 | 66  | 0.17 | 2 | 2 | 2 | tier3 | shared | 1 |
| 5 | 27519527  | 27483770  | C | T | 937 | 17 | 0.02 | 365 | 259 | 0.42 | 608 | 173 | 0.22 | 2 | 2 | 2 | tier3 | shared | 1 |
| 5 | 28213116  | 28177359  | G | A | 448 | 5  | 0.01 | 176 | 127 | 0.42 | 322 | 72  | 0.18 | 2 | 2 | 2 | tier3 | shared | 1 |
| 5 | 40075061  | 40039304  | C | T | 877 | 4  | 0.00 | 313 | 222 | 0.41 | 467 | 136 | 0.23 | 2 | 2 | 2 | tier2 | shared | 1 |
| 5 | 41026023  | 40990266  | C | A | 837 | 11 | 0.01 | 318 | 276 | 0.46 | 621 | 132 | 0.18 | 2 | 2 | 2 | tier3 | shared | 1 |
| 5 | 41340785  | 41305028  | C | T | 446 | 6  | 0.01 | 309 | 222 | 0.42 | 453 | 82  | 0.15 | 2 | 2 | 2 | tier3 | shared | 0 |
| 5 | 45050802  | 45015045  | - | A | 689 | 12 | 0.02 | 274 | 175 | 0.39 | 426 | 86  | 0.17 | 2 | 2 | 2 | tier3 | shared | 0 |
| 5 | 50287607  | 50251850  | G | A | 881 | 10 | 0.01 | 470 | 392 | 0.45 | 623 | 142 | 0.19 | 2 | 2 | 2 | tier3 | shared | 1 |
| 5 | 50319955  | 50284198  | A | T | 511 | 9  | 0.02 | 184 | 136 | 0.43 | 318 | 72  | 0.18 | 2 | 2 | 2 | tier3 | shared | 1 |
| 5 | 5195032   | 5142032   | A | C | 514 | 14 | 0.03 | 203 | 176 | 0.46 | 396 | 97  | 0.20 | 2 | 2 | 2 | tier3 | shared | 1 |
| 5 | 52674933  | 52639176  | G | A | 995 | 16 | 0.02 | 405 | 363 | 0.47 | 554 | 162 | 0.23 | 2 | 2 | 2 | tier3 | shared | 1 |
| 5 | 58047178  | 58011421  | A | C | 827 | 9  | 0.01 | 246 | 211 | 0.46 | 551 | 148 | 0.21 | 2 | 2 | 2 | tier3 | shared | 0 |
| 5 | 6011937   | 5958937   | C | T | 828 | 7  | 0.01 | 341 | 262 | 0.43 | 596 | 150 | 0.20 | 2 | 2 | 2 | tier3 | shared | 0 |
| 5 | 61925228  | 61889472  | A | T | 658 | 18 | 0.03 | 339 | 272 | 0.45 | 587 | 121 | 0.17 | 2 | 2 | 2 | tier3 | shared | 0 |
| 5 | 62828121  | 62792365  | - | A | 815 | 10 | 0.01 | 267 | 171 | 0.39 | 490 | 97  | 0.17 | 2 | 2 | 2 | tier3 | shared | 1 |
| 5 | 66228134  | 66192378  | T | A | 492 | 2  | 0.00 | 226 | 161 | 0.42 | 332 | 71  | 0.18 | 2 | 2 | 2 | tier3 | shared | 0 |
| 5 | 68754819  | 68719063  | C | T | 607 | 6  | 0.01 | 233 | 194 | 0.45 | 268 | 71  | 0.21 | 2 | 2 | 2 | tier3 | shared | 0 |
| 5 | 73010150  | 72974394  | G | A | 667 | 13 | 0.02 | 261 | 217 | 0.45 | 389 | 109 | 0.22 | 2 | 2 | 2 | tier3 | shared | 0 |
| 5 | 8136010   | 8083010   | A | G | 295 | 4  | 0.01 | 138 | 100 | 0.42 | 220 | 34  | 0.13 | 2 | 2 | 2 | tier3 | shared | 1 |
| 5 | 81957081  | 81921325  | T | C | 815 | 13 | 0.02 | 440 | 369 | 0.46 | 611 | 156 | 0.20 | 2 | 2 | 2 | tier3 | shared | 1 |
| 5 | 83095005  | 83059249  | G | A | 591 | 4  | 0.01 | 202 | 184 | 0.48 | 383 | 86  | 0.18 | 2 | 2 | 2 | tier3 | shared | 0 |
| 5 | 83291845  | 83256089  | C | T | 502 | 3  | 0.01 | 150 | 96  | 0.39 | 268 | 72  | 0.21 | 2 | 2 | 2 | tier3 | shared | 1 |
| 5 | 84796281  | 84760525  | C | T | 423 | 4  | 0.01 | 152 | 151 | 0.50 | 163 | 54  | 0.25 | 2 | 2 | 2 | tier2 | shared | 1 |
| 5 | 8688495   | 8635495   | C | T | 253 | 6  | 0.02 | 92  | 67  | 0.42 | 203 | 53  | 0.21 | 2 | 2 | 2 | tier3 | shared | 0 |
| 5 | 91259125  | 91223369  | C | T | 162 | 0  | 0.00 | 35  | 26  | 0.43 | 156 | 36  | 0.19 | 2 | 2 | 2 | tier3 | shared | 1 |
| 5 | 9560797   | 9507797   | G | A | 556 | 9  | 0.02 | 262 | 218 | 0.45 | 355 | 91  | 0.20 | 2 | 2 | 2 | tier3 | shared | 0 |
| 5 | 99860373  | 99832474  | G | A | 963 | 12 | 0.01 | 368 | 298 | 0.45 | 560 | 125 | 0.18 | 2 | 2 | 2 | tier3 | shared | 0 |
| 6 | 103552654 | 103445961 | - | T | 747 | 7  | 0.01 | 313 | 203 | 0.39 | 434 | 98  | 0.18 | 2 | 2 | 2 | tier3 | shared | 0 |
| 6 | 104194545 | 104087852 | C | T | 838 | 18 | 0.02 | 322 | 248 | 0.44 | 507 | 115 | 0.18 | 2 | 2 | 2 | tier3 | shared | 1 |
| 6 | 107361572 | 107254879 | C | T | 867 | 9  | 0.01 | 416 | 294 | 0.41 | 602 | 152 | 0.20 | 2 | 2 | 2 | tier3 | shared | 0 |
| 6 | 107911572 | 107804879 | A | G | 750 | 8  | 0.01 | 225 | 225 | 0.50 | 457 | 114 | 0.20 | 2 | 2 | 2 | tier3 | shared | 0 |
| 6 | 108973472 | 108866779 | C | T | 388 | 6  | 0.02 | 210 | 174 | 0.45 | 313 | 69  | 0.18 | 2 | 2 | 2 | tier2 | shared | 0 |
| 6 | 109236604 | 109129911 | G | A | 498 | 5  | 0.01 | 268 | 249 | 0.48 | 351 | 85  | 0.19 | 2 | 2 | 2 | tier3 | shared | 0 |
| 6 | 114486344 | 114379651 | C | T | 780 | 4  | 0.01 | 184 | 166 | 0.47 | 418 | 100 | 0.19 | 2 | 2 | 2 | tier3 | shared | 0 |
| 6 | 116543169 | 116436476 | G | A | 673 | 12 | 0.02 | 263 | 231 | 0.47 | 533 | 136 | 0.20 | 2 | 2 | 2 | tier3 | shared | 0 |
| 6 | 116546904 | 116440211 | G | A | 679 | 8  | 0.01 | 207 | 167 | 0.45 | 419 | 85  | 0.17 | 2 | 2 | 2 | tier2 | shared | 0 |
| 6 | 117234348 | 117127655 | C | A | 463 | 9  | 0.02 | 238 | 204 | 0.46 | 344 | 68  | 0.17 | 2 | 2 | 2 | tier1 | shared | 2 |
| 6 | 119393476 | 119351777 | T | A | 504 | 11 | 0.02 | 175 | 144 | 0.45 | 512 | 102 | 0.17 | 2 | 2 | 2 | tier3 | shared | 0 |
| 6 | 121696163 | 121654464 | A | T | 651 | 7  | 0.01 | 264 | 174 | 0.40 | 482 | 85  | 0.15 | 2 | 2 | 2 | tier3 | shared | 1 |

|   |           |           |   |                        |     |    |      |     |     |      |     |     |      |   |   |   |       |                |   |
|---|-----------|-----------|---|------------------------|-----|----|------|-----|-----|------|-----|-----|------|---|---|---|-------|----------------|---|
| 6 | 122089204 | 122047505 | G | T                      | 312 | 3  | 0.01 | 96  | 66  | 0.41 | 264 | 64  | 0.20 | 2 | 2 | 2 | tier3 | shared         | 0 |
| 6 | 124876095 | 124834396 | C | A                      | 560 | 1  | 0.00 | 238 | 57  | 0.19 | 442 | 0   | 0.00 | 2 | 2 | 2 | tier3 | tumor-specific | 0 |
| 6 | 126252643 | 126210950 | A | G                      | 656 | 12 | 0.02 | 222 | 190 | 0.46 | 413 | 113 | 0.21 | 2 | 2 | 2 | tier1 | shared         | 2 |
| 6 | 132760245 | 132718552 | C | T                      | 787 | 6  | 0.01 | 327 | 284 | 0.46 | 564 | 112 | 0.17 | 2 | 2 | 2 | tier2 | shared         | 0 |
| 6 | 143970701 | 143929008 | T | C                      | 624 | 2  | 0.00 | 244 | 239 | 0.49 | 396 | 110 | 0.22 | 2 | 2 | 2 | tier3 | shared         | 0 |
| 6 | 144327153 | 144285460 | G | T                      | 671 | 10 | 0.01 | 286 | 256 | 0.47 | 433 | 108 | 0.20 | 2 | 2 | 2 | tier3 | shared         | 0 |
| 6 | 148349163 | 148307470 | C | A                      | 814 | 15 | 0.02 | 433 | 372 | 0.46 | 591 | 141 | 0.19 | 2 | 2 | 2 | tier2 | shared         | 1 |
| 6 | 148695029 | 148653336 | A | -                      | 442 | 25 | 0.05 | 217 | 159 | 0.42 | 280 | 108 | 0.28 | 2 | 2 | 2 | tier3 | shared         | 0 |
| 6 | 149503164 | 149461471 | - | GGTTCGCTT<br>CTTTAAGGG | 981 | 5  | 0.01 | 356 | 195 | 0.35 | 515 | 107 | 0.17 | 2 | 2 | 2 | tier3 | shared         | 0 |
| 6 | 150400423 | 150358730 | C | T                      | 540 | 8  | 0.01 | 239 | 205 | 0.46 | 292 | 80  | 0.22 | 2 | 2 | 2 | tier2 | shared         | 0 |
| 6 | 153178125 | 153136432 | C | T                      | 803 | 10 | 0.01 | 331 | 250 | 0.43 | 552 | 133 | 0.19 | 2 | 2 | 2 | tier3 | shared         | 1 |
| 6 | 15481562  | 15373583  | C | T                      | 562 | 7  | 0.01 | 191 | 167 | 0.47 | 317 | 84  | 0.21 | 2 | 2 | 2 | tier3 | shared         | 0 |
| 6 | 159876141 | 159956151 | G | T                      | 602 | 10 | 0.02 | 367 | 289 | 0.44 | 396 | 103 | 0.21 | 2 | 2 | 2 | tier3 | shared         | 2 |
| 6 | 160718533 | 160798543 | C | T                      | 304 | 8  | 0.03 | 137 | 133 | 0.49 | 266 | 63  | 0.19 | 2 | 2 | 2 | tier3 | shared         | 0 |
| 6 | 161879231 | 161959241 | G | T                      | 714 | 18 | 0.02 | 367 | 301 | 0.45 | 559 | 145 | 0.21 | 2 | 2 | 2 | tier3 | shared         | 0 |
| 6 | 162006577 | 162086587 | G | A                      | 610 | 15 | 0.02 | 345 | 206 | 0.37 | 508 | 129 | 0.20 | 2 | 2 | 2 | tier3 | shared         | 0 |
| 6 | 163316275 | 163396285 | G | T                      | 949 | 9  | 0.01 | 463 | 358 | 0.44 | 704 | 172 | 0.20 | 2 | 2 | 2 | tier3 | shared         | 0 |
| 6 | 168215885 | 168473036 | G | A                      | 279 | 5  | 0.02 | 138 | 124 | 0.47 | 178 | 41  | 0.19 | 2 | 2 | 2 | tier3 | shared         | 0 |
| 6 | 168920610 | 169178685 | G | A                      | 714 | 8  | 0.01 | 231 | 168 | 0.42 | 478 | 91  | 0.16 | 2 | 2 | 2 | tier3 | shared         | 1 |
| 6 | 18123087  | 18015108  | T | C                      | 549 | 3  | 0.01 | 160 | 152 | 0.49 | 358 | 89  | 0.20 | 2 | 2 | 2 | tier3 | shared         | 1 |
| 6 | 19868483  | 19760504  | C | T                      | 794 | 13 | 0.02 | 365 | 293 | 0.45 | 592 | 125 | 0.17 | 2 | 2 | 2 | tier3 | shared         | 1 |
| 6 | 20536224  | 20428245  | - | CTCC                   | 464 | 5  | 0.01 | 277 | 173 | 0.38 | 360 | 116 | 0.24 | 2 | 2 | 2 | tier3 | shared         | 0 |
| 6 | 24626589  | 24518610  | A | G                      | 553 | 8  | 0.01 | 271 | 226 | 0.45 | 391 | 103 | 0.21 | 2 | 2 | 2 | tier2 | shared         | 0 |
| 6 | 30800185  | 30692206  | T | C                      | 192 | 5  | 0.03 | 195 | 31  | 0.14 | 166 | 27  | 0.14 | 2 | 2 | 2 | tier3 | shared         | 0 |
| 6 | 33396275  | 33288297  | G | A                      | 746 | 9  | 0.01 | 353 | 344 | 0.49 | 466 | 107 | 0.19 | 2 | 2 | 2 | tier1 | shared         | 2 |
| 6 | 33906603  | 33798625  | C | T                      | 761 | 15 | 0.02 | 305 | 271 | 0.47 | 443 | 109 | 0.20 | 2 | 2 | 2 | tier3 | shared         | 0 |
| 6 | 3979247   | 4034248   | G | A                      | 390 | 4  | 0.01 | 144 | 85  | 0.37 | 336 | 69  | 0.17 | 2 | 2 | 2 | tier3 | shared         | 2 |
| 6 | 39977212  | 39869234  | C | T                      | 211 | 8  | 0.04 | 131 | 107 | 0.45 | 157 | 36  | 0.19 | 2 | 2 | 2 | tier1 | shared         | 1 |
| 6 | 40675531  | 40567553  | C | T                      | 279 | 5  | 0.02 | 112 | 125 | 0.53 | 211 | 37  | 0.15 | 2 | 2 | 2 | tier2 | shared         | 0 |
| 6 | 40865465  | 40757487  | A | C                      | 646 | 13 | 0.02 | 388 | 307 | 0.44 | 507 | 139 | 0.22 | 2 | 2 | 2 | tier2 | shared         | 1 |
| 6 | 4318625   | 4373626   | A | T                      | 606 | 11 | 0.02 | 254 | 217 | 0.46 | 358 | 105 | 0.23 | 2 | 2 | 2 | tier3 | shared         | 1 |
| 6 | 44351654  | 44243676  | G | A                      | 249 | 1  | 0.00 | 98  | 71  | 0.42 | 120 | 32  | 0.21 | 2 | 2 | 2 | tier1 | shared         | 1 |
| 6 | 45028492  | 44920514  | C | T                      | 591 | 6  | 0.01 | 213 | 150 | 0.41 | 346 | 76  | 0.18 | 2 | 2 | 2 | tier3 | shared         | 0 |
| 6 | 46963602  | 46855643  | C | T                      | 884 | 10 | 0.01 | 427 | 337 | 0.44 | 596 | 153 | 0.20 | 2 | 2 | 2 | tier3 | shared         | 0 |
| 6 | 51685200  | 51577241  | T | A                      | 520 | 3  | 0.01 | 294 | 54  | 0.16 | 445 | 86  | 0.16 | 2 | 2 | 2 | tier3 | shared         | 4 |
| 6 | 53286741  | 53178782  | - | CCTGGT<br>AGGCAA       | 773 | 8  | 0.01 | 435 | 271 | 0.38 | 574 | 96  | 0.14 | 2 | 2 | 2 | tier3 | shared         | 0 |
| 6 | 62689159  | 62631200  | T | G                      | 627 | 11 | 0.02 | 230 | 188 | 0.45 | 470 | 99  | 0.17 | 2 | 2 | 2 | tier3 | shared         | 0 |
| 6 | 65410114  | 65353393  | G | T                      | 431 | 4  | 0.01 | 225 | 218 | 0.49 | 320 | 86  | 0.21 | 2 | 2 | 2 | tier2 | shared         | 0 |
| 6 | 65976834  | 65920113  | C | T                      | 815 | 14 | 0.02 | 336 | 284 | 0.46 | 515 | 141 | 0.21 | 2 | 2 | 2 | tier3 | shared         | 0 |

|   |           |           |   |   |     |    |      |     |     |      |     |     |      |   |   |   |       |                |   |
|---|-----------|-----------|---|---|-----|----|------|-----|-----|------|-----|-----|------|---|---|---|-------|----------------|---|
| 6 | 67396065  | 67339344  | G | A | 733 | 8  | 0.01 | 215 | 184 | 0.46 | 553 | 122 | 0.18 | 2 | 2 | 2 | tier3 | shared         | 1 |
| 6 | 68084645  | 68027924  | G | A | 641 | 10 | 0.02 | 231 | 180 | 0.44 | 471 | 115 | 0.20 | 2 | 2 | 2 | tier3 | shared         | 1 |
| 6 | 69877328  | 69820607  | G | A | 726 | 4  | 0.01 | 217 | 190 | 0.47 | 438 | 128 | 0.23 | 2 | 2 | 2 | tier3 | shared         | 0 |
| 6 | 72910224  | 72853503  | C | T | 510 | 4  | 0.01 | 341 | 69  | 0.17 | 372 | 83  | 0.18 | 2 | 2 | 2 | tier3 | shared         | 2 |
| 6 | 75454007  | 75397287  | G | A | 685 | 11 | 0.02 | 329 | 226 | 0.41 | 566 | 121 | 0.18 | 2 | 2 | 2 | tier3 | shared         | 1 |
| 6 | 75872009  | 75815289  | T | A | 764 | 15 | 0.02 | 281 | 228 | 0.45 | 501 | 121 | 0.19 | 2 | 2 | 2 | tier3 | shared         | 4 |
| 6 | 75917701  | 75860981  | G | A | 628 | 3  | 0.00 | 210 | 133 | 0.39 | 416 | 108 | 0.21 | 2 | 2 | 2 | tier1 | shared         | 4 |
| 6 | 76192831  | 76136111  | C | T | 664 | 5  | 0.01 | 274 | 227 | 0.45 | 392 | 118 | 0.23 | 2 | 2 | 2 | tier3 | shared         | 1 |
| 6 | 76716833  | 76660113  | A | T | 802 | 16 | 0.02 | 302 | 189 | 0.38 | 533 | 129 | 0.19 | 2 | 2 | 2 | tier3 | shared         | 0 |
| 6 | 77534162  | 77477443  | G | T | 436 | 8  | 0.02 | 108 | 85  | 0.44 | 326 | 71  | 0.18 | 2 | 2 | 2 | tier3 | shared         | 1 |
| 6 | 78132876  | 78076157  | C | T | 648 | 10 | 0.02 | 183 | 179 | 0.49 | 471 | 88  | 0.16 | 2 | 2 | 2 | tier3 | shared         | 1 |
| 6 | 78733352  | 78676633  | T | A | 519 | 5  | 0.01 | 241 | 27  | 0.10 | 323 | 82  | 0.20 | 2 | 2 | 2 | tier2 | shared         | 1 |
| 6 | 80356095  | 80299376  | G | A | 584 | 5  | 0.01 | 370 | 69  | 0.16 | 577 | 133 | 0.19 | 2 | 2 | 2 | tier3 | shared         | 0 |
| 6 | 80528802  | 80472083  | A | G | 835 | 10 | 0.01 | 329 | 262 | 0.44 | 650 | 166 | 0.20 | 2 | 2 | 2 | tier3 | shared         | 0 |
| 6 | 82333029  | 82276310  | - | T | 659 | 9  | 0.01 | 322 | 210 | 0.39 | 401 | 122 | 0.23 | 2 | 2 | 2 | tier3 | shared         | 0 |
| 6 | 82854081  | 82797362  | G | T | 642 | 8  | 0.01 | 368 | 270 | 0.42 | 466 | 120 | 0.20 | 2 | 2 | 2 | tier2 | shared         | 1 |
| 6 | 84357966  | 84301247  | - | T | 283 | 6  | 0.02 | 94  | 50  | 0.35 | 222 | 46  | 0.17 | 2 | 2 | 2 | tier3 | shared         | 0 |
| 6 | 87597030  | 87540311  | G | A | 251 | 3  | 0.01 | 52  | 44  | 0.46 | 187 | 48  | 0.20 | 2 | 2 | 2 | tier1 | shared         | 1 |
| 6 | 89948418  | 89891699  | C | T | 440 | 5  | 0.01 | 220 | 191 | 0.46 | 314 | 73  | 0.19 | 2 | 2 | 2 | tier1 | shared         | 1 |
| 6 | 91450832  | 91394111  | C | T | 872 | 16 | 0.02 | 427 | 335 | 0.44 | 531 | 151 | 0.22 | 2 | 2 | 2 | tier3 | shared         | 1 |
| 6 | 92034634  | 91977913  | T | A | 183 | 2  | 0.01 | 116 | 30  | 0.21 | 236 | 1   | 0.00 | 2 | 2 | 2 | tier3 | tumor-specific | 1 |
| 6 | 92083597  | 92026876  | T | C | 549 | 8  | 0.01 | 191 | 151 | 0.44 | 360 | 90  | 0.20 | 2 | 2 | 2 | tier3 | shared         | 1 |
| 6 | 94849356  | 94792635  | C | G | 583 | 6  | 0.01 | 196 | 139 | 0.41 | 405 | 109 | 0.21 | 2 | 2 | 2 | tier3 | shared         | 1 |
| 6 | 96935294  | 96828573  | G | A | 600 | 6  | 0.01 | 227 | 196 | 0.46 | 421 | 79  | 0.16 | 2 | 2 | 2 | tier2 | shared         | 1 |
| 6 | 97344287  | 97237566  | C | T | 820 | 9  | 0.01 | 355 | 323 | 0.48 | 452 | 94  | 0.17 | 2 | 2 | 2 | tier3 | shared         | 0 |
| 6 | 98868269  | 98761548  | C | T | 403 | 3  | 0.01 | 153 | 34  | 0.18 | 260 | 55  | 0.17 | 2 | 2 | 2 | tier3 | shared         | 1 |
| 7 | 103196046 | 103408810 | A | - | 437 | 31 | 0.07 | 206 | 163 | 0.44 | 380 | 105 | 0.22 | 2 | 2 | 2 | tier3 | shared         | 1 |
| 7 | 108836479 | 109049243 | G | A | 907 | 16 | 0.02 | 366 | 314 | 0.46 | 577 | 143 | 0.20 | 2 | 2 | 2 | tier3 | shared         | 1 |
| 7 | 113957820 | 114170584 | - | A | 451 | 9  | 0.02 | 139 | 101 | 0.42 | 364 | 80  | 0.18 | 2 | 2 | 2 | tier2 | shared         | 0 |
| 7 | 11758269  | 11791744  | G | A | 918 | 14 | 0.02 | 347 | 250 | 0.42 | 494 | 125 | 0.20 | 2 | 2 | 2 | tier3 | shared         | 1 |
| 7 | 117982213 | 118194977 | A | T | 590 | 2  | 0.00 | 345 | 65  | 0.16 | 463 | 90  | 0.16 | 2 | 2 | 2 | tier3 | shared         | 1 |
| 7 | 118021666 | 118234430 | C | T | 771 | 7  | 0.01 | 303 | 237 | 0.44 | 488 | 92  | 0.16 | 2 | 2 | 2 | tier3 | shared         | 1 |
| 7 | 118788131 | 119000895 | T | G | 572 | 4  | 0.01 | 169 | 146 | 0.46 | 464 | 105 | 0.18 | 2 | 2 | 2 | tier3 | shared         | 1 |
| 7 | 119110412 | 119323176 | G | A | 498 | 4  | 0.01 | 95  | 54  | 0.36 | 353 | 95  | 0.21 | 2 | 2 | 2 | tier3 | shared         | 1 |
| 7 | 121048122 | 121260886 | G | C | 729 | 4  | 0.01 | 259 | 234 | 0.47 | 508 | 106 | 0.17 | 2 | 2 | 2 | tier3 | shared         | 0 |
| 7 | 121180499 | 121393263 | G | T | 660 | 8  | 0.01 | 307 | 238 | 0.44 | 405 | 105 | 0.21 | 2 | 2 | 2 | tier3 | shared         | 0 |
| 7 | 12126741  | 12160216  | C | T | 801 | 9  | 0.01 | 308 | 210 | 0.41 | 548 | 131 | 0.19 | 2 | 2 | 2 | tier3 | shared         | 1 |
| 7 | 121979809 | 122192573 | G | A | 627 | 7  | 0.01 | 332 | 237 | 0.42 | 501 | 128 | 0.20 | 2 | 2 | 2 | tier3 | shared         | 0 |
| 7 | 12343039  | 12376514  | G | T | 540 | 14 | 0.03 | 206 | 202 | 0.50 | 375 | 86  | 0.19 | 2 | 2 | 2 | tier3 | shared         | 0 |
| 7 | 124683407 | 124896171 | C | T | 876 | 8  | 0.01 | 303 | 240 | 0.44 | 486 | 126 | 0.21 | 2 | 2 | 2 | tier3 | shared         | 0 |

|   |           |           |      |   |      |    |      |     |     |      |     |     |      |   |   |   |       |                  |   |
|---|-----------|-----------|------|---|------|----|------|-----|-----|------|-----|-----|------|---|---|---|-------|------------------|---|
| 7 | 124892606 | 125105370 | A    | C | 864  | 18 | 0.02 | 306 | 286 | 0.48 | 507 | 160 | 0.24 | 2 | 2 | 2 | tier3 | shared           | 1 |
| 7 | 125413416 | 125626180 | C    | A | 829  | 6  | 0.01 | 317 | 276 | 0.47 | 529 | 122 | 0.19 | 2 | 2 | 2 | tier3 | shared           | 1 |
| 7 | 126133132 | 126345896 | G    | T | 252  | 5  | 0.02 | 70  | 61  | 0.47 | 194 | 45  | 0.19 | 2 | 2 | 2 | tier3 | shared           | 2 |
| 7 | 126677763 | 126890527 | C    | A | 768  | 10 | 0.01 | 331 | 306 | 0.48 | 538 | 165 | 0.23 | 2 | 2 | 2 | tier3 | shared           | 2 |
| 7 | 12893363  | 12926838  | G    | C | 202  | 1  | 0.00 | 46  | 60  | 0.57 | 134 | 44  | 0.25 | 2 | 2 | 2 | tier3 | shared           | 0 |
| 7 | 130050909 | 130400369 | C    | T | 577  | 12 | 0.02 | 240 | 187 | 0.44 | 431 | 100 | 0.19 | 2 | 2 | 2 | tier3 | shared           | 0 |
| 7 | 13310673  | 13344148  | C    | A | 1146 | 13 | 0.01 | 397 | 330 | 0.45 | 641 | 165 | 0.20 | 2 | 2 | 2 | tier2 | shared           | 1 |
| 7 | 133834313 | 134183773 | C    | T | 626  | 5  | 0.01 | 208 | 164 | 0.44 | 447 | 95  | 0.18 | 2 | 2 | 2 | tier3 | shared           | 0 |
| 7 | 135616675 | 135966135 | G    | A | 894  | 11 | 0.01 | 291 | 230 | 0.44 | 597 | 126 | 0.17 | 2 | 2 | 2 | tier3 | shared           | 0 |
| 7 | 136953685 | 137303145 | C    | A | 882  | 14 | 0.02 | 385 | 326 | 0.46 | 495 | 136 | 0.22 | 2 | 2 | 2 | tier3 | shared           | 0 |
| 7 | 13982316  | 14015791  | G    | A | 858  | 17 | 0.02 | 317 | 238 | 0.43 | 441 | 103 | 0.19 | 2 | 2 | 2 | tier3 | shared           | 1 |
| 7 | 14027804  | 14061279  | G    | T | 824  | 7  | 0.01 | 321 | 289 | 0.47 | 535 | 145 | 0.21 | 2 | 2 | 2 | tier3 | shared           | 1 |
| 7 | 140813368 | 141166899 | G    | A | 714  | 8  | 0.01 | 417 | 298 | 0.42 | 498 | 145 | 0.23 | 2 | 2 | 2 | tier3 | shared           | 0 |
| 7 | 143334961 | 143704028 | A    | G | 825  | 9  | 0.01 | 334 | 256 | 0.43 | 467 | 122 | 0.21 | 2 | 2 | 2 | tier3 | shared           | 0 |
| 7 | 145279476 | 145648543 | G    | A | 933  | 16 | 0.02 | 390 | 263 | 0.40 | 671 | 197 | 0.23 | 2 | 2 | 2 | tier3 | shared           | 0 |
| 7 | 145812969 | 146182036 | G    | A | 524  | 7  | 0.01 | 161 | 109 | 0.40 | 390 | 83  | 0.18 | 2 | 2 | 2 | tier3 | shared           | 0 |
| 7 | 147045265 | 147414332 | G    | A | 794  | 7  | 0.01 | 472 | 81  | 0.15 | 530 | 126 | 0.19 | 2 | 2 | 2 | tier3 | shared           | 0 |
| 7 | 147184461 | 147553528 | C    | T | 975  | 10 | 0.01 | 358 | 290 | 0.45 | 485 | 129 | 0.21 | 2 | 2 | 2 | tier2 | shared           | 0 |
| 7 | 147458830 | 147827897 | T    | - | 482  | 3  | 0.01 | 174 | 120 | 0.41 | 286 | 78  | 0.21 | 2 | 2 | 2 | tier3 | shared           | 0 |
| 7 | 150308416 | 150677483 | G    | A | 342  | 1  | 0.00 | 252 | 220 | 0.47 | 280 | 59  | 0.17 | 2 | 2 | 2 | tier3 | shared           | 2 |
| 7 | 150449000 | 150818067 | C    | T | 389  | 7  | 0.02 | 238 | 191 | 0.45 | 258 | 84  | 0.25 | 2 | 2 | 2 | tier3 | shared           | 0 |
| 7 | 154050162 | 154419229 | T    | A | 564  | 6  | 0.01 | 218 | 160 | 0.42 | 316 | 73  | 0.19 | 2 | 2 | 2 | tier3 | shared           | 2 |
| 7 | 155933309 | 156240548 | G    | A | 840  | 13 | 0.02 | 400 | 325 | 0.45 | 624 | 126 | 0.17 | 2 | 2 | 2 | tier3 | shared           | 1 |
| 7 | 156029939 | 156337178 | C    | T | 691  | 12 | 0.02 | 298 | 219 | 0.42 | 453 | 115 | 0.20 | 2 | 2 | 2 | tier3 | shared           | 1 |
| 7 | 157401607 | 157708846 | C    | T | 614  | 7  | 0.01 | 273 | 204 | 0.43 | 365 | 91  | 0.20 | 2 | 2 | 2 | tier3 | shared           | 2 |
| 7 | 157546337 | 157853576 | G    | A | 547  | 8  | 0.01 | 273 | 206 | 0.43 | 437 | 99  | 0.18 | 2 | 2 | 2 | tier3 | shared           | 2 |
| 7 | 16471580  | 16505055  | A    | - | 465  | 20 | 0.04 | 245 | 183 | 0.43 | 311 | 86  | 0.22 | 2 | 2 | 2 | tier3 | shared           | 0 |
| 7 | 16612624  | 16646099  | G    | A | 575  | 4  | 0.01 | 166 | 121 | 0.42 | 512 | 101 | 0.16 | 2 | 2 | 2 | tier3 | shared           | 0 |
| 7 | 18985171  | 19018646  | C    | A | 595  | 4  | 0.01 | 242 | 173 | 0.42 | 403 | 101 | 0.20 | 2 | 2 | 2 | tier3 | shared           | 0 |
| 7 | 19896920  | 19930395  | G    | A | 582  | 1  | 0.00 | 380 | 1   | 0.00 | 450 | 140 | 0.24 | 2 | 2 | 2 | tier3 | relapse-specific | 1 |
| 7 | 20705083  | 20738558  | C    | T | 649  | 9  | 0.01 | 303 | 253 | 0.46 | 475 | 133 | 0.22 | 2 | 2 | 2 | tier3 | shared           | 1 |
| 7 | 21530093  | 21563568  | G    | T | 572  | 10 | 0.02 | 185 | 76  | 0.29 | 410 | 94  | 0.19 | 2 | 2 | 2 | tier3 | shared           | 1 |
| 7 | 22567575  | 22601050  | C    | T | 476  | 10 | 0.02 | 222 | 184 | 0.45 | 311 | 80  | 0.20 | 2 | 2 | 2 | tier2 | shared           | 0 |
| 7 | 27582747  | 27616222  | -    | A | 838  | 14 | 0.02 | 366 | 280 | 0.43 | 688 | 160 | 0.19 | 2 | 2 | 2 | tier3 | shared           | 0 |
| 7 | 28538689  | 28572164  | G    | A | 832  | 8  | 0.01 | 356 | 247 | 0.41 | 504 | 118 | 0.19 | 2 | 2 | 2 | tier2 | shared           | 0 |
| 7 | 34480256  | 34513731  | G    | A | 354  | 5  | 0.01 | 150 | 140 | 0.48 | 244 | 56  | 0.19 | 2 | 2 | 2 | tier3 | shared           | 0 |
| 7 | 36496966  | 36530441  | AATC | - | 781  | 13 | 0.02 | 401 | 265 | 0.40 | 596 | 130 | 0.18 | 2 | 2 | 2 | tier3 | shared           | 0 |
| 7 | 3872973   | 3906447   | G    | A | 576  | 11 | 0.02 | 336 | 307 | 0.48 | 375 | 94  | 0.20 | 2 | 2 | 2 | tier3 | shared           | 2 |
| 7 | 41365685  | 41399160  | T    | A | 586  | 6  | 0.01 | 245 | 201 | 0.45 | 505 | 124 | 0.20 | 2 | 2 | 2 | tier2 | shared           | 1 |
| 7 | 45917575  | 45951050  | G    | A | 794  | 13 | 0.02 | 407 | 322 | 0.44 | 483 | 144 | 0.23 | 2 | 2 | 2 | tier3 | shared           | 0 |

|   |           |           |   |   |     |    |      |     |     |      |     |     |      |   |   |   |       |        |   |
|---|-----------|-----------|---|---|-----|----|------|-----|-----|------|-----|-----|------|---|---|---|-------|--------|---|
| 7 | 46613062  | 46646537  | T | A | 789 | 19 | 0.02 | 382 | 292 | 0.43 | 476 | 122 | 0.20 | 2 | 2 | 2 | tier2 | shared | 1 |
| 7 | 46999091  | 47032566  | G | A | 659 | 16 | 0.02 | 456 | 299 | 0.40 | 553 | 106 | 0.16 | 2 | 2 | 2 | tier3 | shared | 0 |
| 7 | 48243583  | 48273037  | C | T | 499 | 8  | 0.02 | 159 | 159 | 0.50 | 273 | 81  | 0.23 | 2 | 2 | 2 | tier3 | shared | 1 |
| 7 | 48517246  | 48546700  | G | A | 594 | 14 | 0.02 | 256 | 194 | 0.43 | 344 | 92  | 0.21 | 2 | 2 | 2 | tier3 | shared | 1 |
| 7 | 53945984  | 53978490  | A | T | 403 | 3  | 0.01 | 102 | 78  | 0.43 | 331 | 82  | 0.20 | 2 | 2 | 2 | tier3 | shared | 0 |
| 7 | 5607312   | 5640786   | T | C | 544 | 4  | 0.01 | 196 | 186 | 0.49 | 349 | 118 | 0.25 | 2 | 2 | 2 | tier3 | shared | 0 |
| 7 | 62139096  | 62501661  | G | A | 207 | 1  | 0.00 | 151 | 122 | 0.45 | 145 | 32  | 0.18 | 2 | 2 | 2 | tier3 | shared | 0 |
| 7 | 64554301  | 64916866  | G | A | 616 | 5  | 0.01 | 261 | 225 | 0.46 | 403 | 110 | 0.21 | 2 | 2 | 2 | tier2 | shared | 1 |
| 7 | 67727257  | 68089321  | T | C | 637 | 5  | 0.01 | 300 | 239 | 0.44 | 472 | 129 | 0.21 | 2 | 2 | 2 | tier2 | shared | 1 |
| 7 | 69598443  | 69960507  | - | T | 646 | 10 | 0.02 | 390 | 316 | 0.45 | 468 | 123 | 0.21 | 2 | 2 | 2 | tier3 | shared | 0 |
| 7 | 70083513  | 70445577  | G | A | 413 | 9  | 0.02 | 239 | 224 | 0.48 | 264 | 77  | 0.23 | 2 | 2 | 2 | tier2 | shared | 1 |
| 7 | 75641728  | 75803792  | G | A | 536 | 11 | 0.02 | 265 | 204 | 0.43 | 315 | 58  | 0.16 | 2 | 2 | 2 | tier3 | shared | 0 |
| 7 | 77964306  | 78126370  | C | T | 756 | 5  | 0.01 | 316 | 217 | 0.41 | 518 | 127 | 0.20 | 2 | 2 | 2 | tier3 | shared | 3 |
| 7 | 79553451  | 79715515  | C | A | 547 | 7  | 0.01 | 163 | 117 | 0.42 | 343 | 81  | 0.19 | 2 | 2 | 2 | tier3 | shared | 0 |
| 7 | 79811760  | 79973824  | C | A | 768 | 6  | 0.01 | 277 | 149 | 0.35 | 521 | 125 | 0.19 | 2 | 2 | 2 | tier3 | shared | 0 |
| 7 | 82688262  | 82850326  | C | T | 779 | 13 | 0.02 | 306 | 238 | 0.44 | 561 | 136 | 0.20 | 2 | 2 | 2 | tier3 | shared | 1 |
| 7 | 82707778  | 82869842  | C | T | 620 | 18 | 0.03 | 194 | 147 | 0.43 | 558 | 123 | 0.18 | 2 | 2 | 2 | tier2 | shared | 1 |
| 7 | 83500850  | 83662914  | C | A | 862 | 12 | 0.01 | 291 | 241 | 0.45 | 570 | 122 | 0.18 | 2 | 2 | 2 | tier3 | shared | 2 |
| 7 | 85736915  | 85898979  | T | C | 619 | 3  | 0.00 | 211 | 195 | 0.48 | 374 | 120 | 0.24 | 2 | 2 | 2 | tier3 | shared | 1 |
| 7 | 85740139  | 85902203  | T | A | 955 | 11 | 0.01 | 315 | 266 | 0.46 | 558 | 129 | 0.19 | 2 | 2 | 2 | tier3 | shared | 1 |
| 7 | 89409537  | 89571601  | C | A | 582 | 9  | 0.02 | 186 | 177 | 0.49 | 394 | 85  | 0.18 | 2 | 2 | 2 | tier3 | shared | 1 |
| 7 | 90733681  | 90895745  | G | A | 576 | 8  | 0.01 | 242 | 201 | 0.45 | 316 | 71  | 0.18 | 2 | 2 | 2 | tier1 | shared | 1 |
| 7 | 91075171  | 91237235  | G | A | 565 | 7  | 0.01 | 301 | 256 | 0.46 | 459 | 127 | 0.22 | 2 | 2 | 2 | tier3 | shared | 1 |
| 7 | 9128829   | 9162304   | T | C | 570 | 8  | 0.01 | 237 | 156 | 0.40 | 406 | 127 | 0.24 | 2 | 2 | 2 | tier2 | shared | 1 |
| 7 | 94408472  | 94570536  | G | A | 666 | 15 | 0.02 | 274 | 227 | 0.45 | 407 | 87  | 0.18 | 2 | 2 | 2 | tier3 | shared | 1 |
| 7 | 95994573  | 96156637  | G | A | 955 | 16 | 0.02 | 333 | 294 | 0.47 | 501 | 141 | 0.22 | 2 | 2 | 2 | tier3 | shared | 0 |
| 8 | 100274306 | 100205130 | C | A | 959 | 13 | 0.01 | 401 | 267 | 0.40 | 541 | 130 | 0.19 | 2 | 2 | 2 | tier1 | shared | 1 |
| 8 | 102195749 | 102126573 | G | A | 744 | 12 | 0.02 | 273 | 212 | 0.44 | 446 | 116 | 0.21 | 2 | 2 | 2 | tier3 | shared | 0 |
| 8 | 103718738 | 103649562 | G | A | 219 | 4  | 0.02 | 117 | 135 | 0.54 | 163 | 54  | 0.25 | 2 | 2 | 2 | tier3 | shared | 0 |
| 8 | 104741189 | 104672013 | G | A | 696 | 12 | 0.02 | 375 | 282 | 0.43 | 385 | 97  | 0.20 | 2 | 2 | 2 | tier2 | shared | 0 |
| 8 | 105436497 | 105367321 | C | T | 706 | 12 | 0.02 | 315 | 241 | 0.43 | 413 | 102 | 0.20 | 2 | 2 | 2 | tier1 | shared | 1 |
| 8 | 105440530 | 105371354 | T | C | 613 | 16 | 0.03 | 272 | 213 | 0.44 | 385 | 98  | 0.20 | 2 | 2 | 2 | tier3 | shared | 0 |
| 8 | 108709296 | 108640120 | T | C | 527 | 7  | 0.01 | 181 | 161 | 0.47 | 302 | 76  | 0.20 | 2 | 2 | 2 | tier3 | shared | 1 |
| 8 | 11035050  | 10997640  | A | - | 228 | 16 | 0.07 | 50  | 52  | 0.51 | 230 | 83  | 0.27 | 2 | 2 | 2 | tier3 | shared | 0 |
| 8 | 112102672 | 112033496 | C | T | 572 | 11 | 0.02 | 302 | 257 | 0.46 | 592 | 128 | 0.18 | 2 | 2 | 2 | tier2 | shared | 1 |
| 8 | 112908937 | 112839761 | T | A | 293 | 4  | 0.01 | 124 | 70  | 0.36 | 257 | 59  | 0.19 | 2 | 2 | 2 | tier3 | shared | 1 |
| 8 | 112908940 | 112839764 | A | T | 289 | 5  | 0.02 | 124 | 71  | 0.36 | 262 | 61  | 0.19 | 2 | 2 | 2 | tier3 | shared | 1 |
| 8 | 113563112 | 113493936 | G | T | 624 | 9  | 0.01 | 245 | 245 | 0.50 | 563 | 143 | 0.20 | 2 | 2 | 2 | tier3 | shared | 2 |
| 8 | 113884103 | 113814927 | C | T | 310 | 1  | 0.00 | 72  | 43  | 0.37 | 280 | 78  | 0.22 | 2 | 2 | 2 | tier3 | shared | 2 |
| 8 | 113952281 | 113883105 | G | T | 646 | 9  | 0.01 | 206 | 190 | 0.48 | 432 | 96  | 0.18 | 2 | 2 | 2 | tier3 | shared | 2 |

|   |           |           |   |   |      |    |      |     |     |      |     |     |      |   |   |   |       |        |   |
|---|-----------|-----------|---|---|------|----|------|-----|-----|------|-----|-----|------|---|---|---|-------|--------|---|
| 8 | 114524003 | 114454827 | C | A | 215  | 1  | 0.00 | 41  | 30  | 0.42 | 130 | 28  | 0.18 | 2 | 2 | 2 | tier3 | shared | 2 |
| 8 | 116221163 | 116151987 | G | A | 616  | 5  | 0.01 | 234 | 189 | 0.45 | 509 | 127 | 0.20 | 2 | 2 | 2 | tier3 | shared | 1 |
| 8 | 123401103 | 123331922 | A | T | 667  | 9  | 0.01 | 310 | 299 | 0.49 | 601 | 168 | 0.22 | 2 | 2 | 2 | tier3 | shared | 1 |
| 8 | 126722699 | 126653517 | C | T | 263  | 2  | 0.01 | 180 | 127 | 0.41 | 199 | 52  | 0.21 | 2 | 2 | 2 | tier3 | shared | 1 |
| 8 | 129603854 | 129534672 | C | T | 721  | 6  | 0.01 | 331 | 290 | 0.47 | 450 | 123 | 0.21 | 2 | 2 | 2 | tier3 | shared | 1 |
| 8 | 132866073 | 132796891 | G | A | 525  | 3  | 0.01 | 208 | 191 | 0.48 | 396 | 98  | 0.20 | 2 | 2 | 2 | tier3 | shared | 1 |
| 8 | 133786740 | 133717558 | C | T | 930  | 8  | 0.01 | 367 | 290 | 0.44 | 632 | 145 | 0.19 | 2 | 2 | 2 | tier3 | shared | 0 |
| 8 | 136741543 | 136672361 | G | T | 868  | 11 | 0.01 | 403 | 380 | 0.49 | 579 | 123 | 0.18 | 2 | 2 | 2 | tier3 | shared | 0 |
| 8 | 137945484 | 137876302 | G | A | 699  | 10 | 0.01 | 293 | 249 | 0.46 | 438 | 103 | 0.19 | 2 | 2 | 2 | tier3 | shared | 1 |
| 8 | 138136457 | 138067275 | T | - | 702  | 11 | 0.02 | 299 | 248 | 0.45 | 490 | 120 | 0.20 | 2 | 2 | 2 | tier3 | shared | 1 |
| 8 | 138808147 | 138738965 | G | A | 525  | 9  | 0.02 | 115 | 94  | 0.45 | 326 | 67  | 0.17 | 2 | 2 | 2 | tier3 | shared | 1 |
| 8 | 139010667 | 138941485 | T | A | 959  | 12 | 0.01 | 378 | 295 | 0.44 | 520 | 114 | 0.18 | 2 | 2 | 2 | tier3 | shared | 0 |
| 8 | 14003678  | 13959307  | G | A | 468  | 8  | 0.02 | 123 | 115 | 0.48 | 319 | 43  | 0.12 | 2 | 2 | 2 | tier3 | shared | 0 |
| 8 | 141826006 | 141756824 | T | C | 838  | 16 | 0.02 | 326 | 253 | 0.44 | 607 | 131 | 0.18 | 2 | 2 | 2 | tier3 | shared | 2 |
| 8 | 142691667 | 142622485 | C | T | 511  | 5  | 0.01 | 286 | 235 | 0.45 | 394 | 97  | 0.20 | 2 | 2 | 2 | tier3 | shared | 1 |
| 8 | 143442253 | 143444346 | C | T | 578  | 2  | 0.00 | 313 | 337 | 0.52 | 388 | 118 | 0.23 | 2 | 2 | 2 | tier2 | shared | 0 |
| 8 | 143622650 | 143625648 | C | T | 448  | 4  | 0.01 | 160 | 178 | 0.53 | 242 | 70  | 0.22 | 2 | 2 | 2 | tier1 | shared | 2 |
| 8 | 143691876 | 143694874 | C | G | 577  | 14 | 0.02 | 304 | 229 | 0.43 | 371 | 87  | 0.19 | 2 | 2 | 2 | tier1 | shared | 1 |
| 8 | 145639466 | 145668658 | G | A | 588  | 9  | 0.02 | 301 | 238 | 0.44 | 356 | 92  | 0.21 | 2 | 2 | 2 | tier1 | shared | 1 |
| 8 | 15129878  | 15085507  | C | T | 786  | 7  | 0.01 | 249 | 216 | 0.46 | 465 | 105 | 0.18 | 2 | 2 | 2 | tier3 | shared | 0 |
| 8 | 15637985  | 15593614  | G | A | 776  | 5  | 0.01 | 413 | 98  | 0.19 | 490 | 121 | 0.20 | 2 | 2 | 2 | tier3 | shared | 1 |
| 8 | 17926247  | 17881967  | A | C | 383  | 8  | 0.02 | 123 | 100 | 0.45 | 322 | 76  | 0.19 | 2 | 2 | 2 | tier3 | shared | 0 |
| 8 | 1797828   | 1810421   | G | A | 174  | 0  | 0.00 | 134 | 95  | 0.41 | 158 | 37  | 0.19 | 2 | 2 | 2 | tier2 | shared | 0 |
| 8 | 19365821  | 19321541  | C | T | 663  | 4  | 0.01 | 342 | 373 | 0.52 | 411 | 114 | 0.22 | 2 | 2 | 2 | tier3 | shared | 1 |
| 8 | 20096196  | 20051916  | C | T | 390  | 6  | 0.02 | 148 | 147 | 0.50 | 268 | 83  | 0.24 | 2 | 2 | 2 | tier3 | shared | 0 |
| 8 | 21547942  | 21503662  | C | T | 390  | 5  | 0.01 | 153 | 134 | 0.47 | 220 | 60  | 0.21 | 2 | 2 | 2 | tier2 | shared | 0 |
| 8 | 22120146  | 22064201  | C | T | 732  | 12 | 0.02 | 377 | 277 | 0.42 | 445 | 111 | 0.20 | 2 | 2 | 2 | tier3 | shared | 0 |
| 8 | 22640746  | 22584801  | G | A | 608  | 8  | 0.01 | 350 | 245 | 0.41 | 358 | 77  | 0.18 | 2 | 2 | 2 | tier3 | shared | 0 |
| 8 | 25061684  | 25005767  | T | C | 835  | 6  | 0.01 | 398 | 292 | 0.42 | 433 | 130 | 0.23 | 2 | 2 | 2 | tier3 | shared | 1 |
| 8 | 2615106   | 2627699   | C | T | 674  | 6  | 0.01 | 291 | 201 | 0.41 | 500 | 108 | 0.18 | 2 | 2 | 2 | tier3 | shared | 1 |
| 8 | 30202324  | 30082782  | C | T | 924  | 12 | 0.01 | 355 | 275 | 0.44 | 612 | 128 | 0.17 | 2 | 2 | 2 | tier3 | shared | 0 |
| 8 | 3374021   | 3386613   | C | T | 781  | 10 | 0.01 | 292 | 196 | 0.40 | 498 | 126 | 0.20 | 2 | 2 | 2 | tier3 | shared | 5 |
| 8 | 34617311  | 34497769  | C | T | 743  | 11 | 0.01 | 408 | 291 | 0.42 | 497 | 137 | 0.22 | 2 | 2 | 2 | tier3 | shared | 1 |
| 8 | 34710517  | 34590975  | C | T | 663  | 8  | 0.01 | 356 | 217 | 0.38 | 516 | 118 | 0.19 | 2 | 2 | 2 | tier3 | shared | 1 |
| 8 | 37792367  | 37673209  | G | A | 394  | 6  | 0.02 | 241 | 161 | 0.40 | 260 | 72  | 0.22 | 2 | 2 | 2 | tier3 | shared | 1 |
| 8 | 3844133   | 3856725   | A | G | 444  | 4  | 0.01 | 132 | 112 | 0.46 | 231 | 58  | 0.20 | 2 | 2 | 2 | tier3 | shared | 5 |
| 8 | 40901384  | 40782227  | G | A | 490  | 8  | 0.02 | 205 | 234 | 0.53 | 309 | 79  | 0.20 | 2 | 2 | 2 | tier3 | shared | 0 |
| 8 | 4514793   | 4527385   | C | G | 550  | 9  | 0.02 | 196 | 153 | 0.44 | 351 | 124 | 0.26 | 2 | 2 | 2 | tier3 | shared | 5 |
| 8 | 4666132   | 4678724   | G | A | 1138 | 14 | 0.01 | 392 | 323 | 0.45 | 616 | 175 | 0.22 | 2 | 2 | 2 | tier3 | shared | 5 |
| 8 | 49695481  | 49532928  | G | A | 764  | 12 | 0.02 | 335 | 307 | 0.48 | 453 | 123 | 0.21 | 2 | 2 | 2 | tier2 | shared | 0 |

|   |           |           |   |                    |      |    |      |     |     |      |     |     |      |   |   |   |       |                |   |
|---|-----------|-----------|---|--------------------|------|----|------|-----|-----|------|-----|-----|------|---|---|---|-------|----------------|---|
| 8 | 49768959  | 49606406  | G | A                  | 479  | 3  | 0.01 | 235 | 155 | 0.40 | 313 | 59  | 0.16 | 2 | 2 | 2 | tier3 | shared         | 0 |
| 8 | 52769210  | 52606657  | C | T                  | 592  | 10 | 0.02 | 326 | 254 | 0.44 | 508 | 115 | 0.18 | 2 | 2 | 2 | tier2 | shared         | 1 |
| 8 | 52919557  | 52757004  | T | C                  | 965  | 13 | 0.01 | 430 | 362 | 0.46 | 641 | 172 | 0.21 | 2 | 2 | 2 | tier2 | shared         | 0 |
| 8 | 5533819   | 5546411   | C | T                  | 601  | 5  | 0.01 | 217 | 167 | 0.43 | 457 | 113 | 0.20 | 2 | 2 | 2 | tier3 | shared         | 1 |
| 8 | 56380197  | 56217643  | C | T                  | 575  | 12 | 0.02 | 217 | 150 | 0.41 | 365 | 104 | 0.22 | 2 | 2 | 2 | tier3 | shared         | 1 |
| 8 | 56433852  | 56271298  | G | A                  | 667  | 6  | 0.01 | 323 | 248 | 0.43 | 482 | 107 | 0.18 | 2 | 2 | 2 | tier3 | shared         | 1 |
| 8 | 63723910  | 63561356  | C | A                  | 514  | 15 | 0.03 | 298 | 249 | 0.46 | 384 | 102 | 0.21 | 2 | 2 | 2 | tier3 | shared         | 0 |
| 8 | 6563244   | 6575836   | - | CTGTCCT<br>GTACCAT | 589  | 3  | 0.01 | 366 | 252 | 0.41 | 476 | 104 | 0.18 | 2 | 2 | 2 | tier2 | shared         | 0 |
| 8 | 68686633  | 68524079  | C | T                  | 638  | 10 | 0.02 | 290 | 257 | 0.47 | 423 | 121 | 0.22 | 2 | 2 | 2 | tier2 | shared         | 0 |
| 8 | 69257911  | 69095357  | C | T                  | 429  | 10 | 0.02 | 231 | 197 | 0.46 | 373 | 91  | 0.20 | 2 | 2 | 2 | tier3 | shared         | 0 |
| 8 | 72611511  | 72448957  | C | T                  | 897  | 11 | 0.01 | 334 | 289 | 0.46 | 472 | 125 | 0.21 | 2 | 2 | 2 | tier3 | shared         | 0 |
| 8 | 76784885  | 76622330  | A | G                  | 572  | 16 | 0.03 | 244 | 196 | 0.45 | 328 | 84  | 0.20 | 2 | 2 | 2 | tier3 | shared         | 1 |
| 8 | 77920715  | 77758160  | C | A                  | 628  | 5  | 0.01 | 181 | 141 | 0.44 | 364 | 84  | 0.19 | 2 | 2 | 2 | tier3 | shared         | 1 |
| 8 | 79939985  | 79777430  | G | A                  | 453  | 2  | 0.00 | 117 | 99  | 0.46 | 294 | 78  | 0.21 | 2 | 2 | 2 | tier3 | shared         | 1 |
| 8 | 80274759  | 80112204  | T | G                  | 819  | 13 | 0.02 | 304 | 265 | 0.47 | 648 | 123 | 0.16 | 2 | 2 | 2 | tier3 | shared         | 1 |
| 8 | 82111729  | 81949174  | G | A                  | 794  | 14 | 0.02 | 247 | 209 | 0.46 | 432 | 93  | 0.18 | 2 | 2 | 2 | tier2 | shared         | 0 |
| 8 | 82285709  | 82123154  | C | T                  | 566  | 6  | 0.01 | 255 | 209 | 0.45 | 335 | 93  | 0.22 | 2 | 2 | 2 | tier3 | shared         | 0 |
| 8 | 83837357  | 83674802  | G | A                  | 556  | 2  | 0.00 | 292 | 89  | 0.23 | 475 | 0   | 0.00 | 2 | 2 | 2 | tier3 | tumor-specific | 1 |
| 8 | 8483635   | 8446225   | G | A                  | 438  | 6  | 0.01 | 216 | 178 | 0.45 | 281 | 55  | 0.16 | 2 | 2 | 2 | tier2 | shared         | 0 |
| 8 | 89618273  | 89549157  | G | T                  | 727  | 18 | 0.02 | 304 | 296 | 0.49 | 460 | 156 | 0.25 | 2 | 2 | 2 | tier3 | shared         | 1 |
| 8 | 91377089  | 91307913  | G | A                  | 678  | 9  | 0.01 | 183 | 152 | 0.45 | 400 | 98  | 0.20 | 2 | 2 | 2 | tier3 | shared         | 1 |
| 8 | 91615221  | 91546045  | G | A                  | 944  | 10 | 0.01 | 411 | 351 | 0.46 | 650 | 132 | 0.17 | 2 | 2 | 2 | tier3 | shared         | 0 |
| 8 | 92065382  | 91996206  | C | T                  | 583  | 6  | 0.01 | 224 | 165 | 0.42 | 414 | 70  | 0.14 | 2 | 2 | 2 | tier3 | shared         | 0 |
| 8 | 92594485  | 92525309  | C | T                  | 741  | 6  | 0.01 | 325 | 229 | 0.41 | 553 | 118 | 0.18 | 2 | 2 | 2 | tier3 | shared         | 0 |
| 8 | 96026248  | 95957072  | A | G                  | 463  | 2  | 0.00 | 215 | 198 | 0.48 | 275 | 70  | 0.20 | 2 | 2 | 2 | tier3 | shared         | 1 |
| 8 | 98358079  | 98288903  | C | A                  | 549  | 6  | 0.01 | 313 | 237 | 0.43 | 365 | 87  | 0.19 | 2 | 2 | 2 | tier1 | shared         | 1 |
| 9 | 100051345 | 101011524 | C | T                  | 444  | 5  | 0.01 | 309 | 293 | 0.49 | 350 | 87  | 0.20 | 2 | 2 | 2 | tier3 | shared         | 1 |
| 9 | 103136695 | 104096874 | G | A                  | 543  | 13 | 0.02 | 224 | 232 | 0.51 | 279 | 80  | 0.22 | 2 | 2 | 2 | tier3 | shared         | 0 |
| 9 | 112429998 | 113390177 | A | G                  | 756  | 12 | 0.02 | 269 | 215 | 0.44 | 515 | 110 | 0.18 | 2 | 2 | 2 | tier3 | shared         | 0 |
| 9 | 112540631 | 113500810 | A | G                  | 775  | 14 | 0.02 | 416 | 308 | 0.43 | 597 | 160 | 0.21 | 2 | 2 | 2 | tier3 | shared         | 0 |
| 9 | 115637768 | 116597947 | C | T                  | 553  | 2  | 0.00 | 134 | 137 | 0.51 | 457 | 99  | 0.18 | 2 | 2 | 2 | tier3 | shared         | 0 |
| 9 | 11778521  | 11788521  | C | T                  | 613  | 10 | 0.02 | 252 | 224 | 0.47 | 363 | 94  | 0.21 | 2 | 2 | 2 | tier3 | shared         | 1 |
| 9 | 118895816 | 119855995 | G | A                  | 729  | 9  | 0.01 | 326 | 313 | 0.49 | 447 | 116 | 0.21 | 2 | 2 | 2 | tier3 | shared         | 0 |
| 9 | 120457959 | 121418138 | T | A                  | 1051 | 16 | 0.01 | 484 | 446 | 0.48 | 730 | 203 | 0.22 | 2 | 2 | 2 | tier3 | shared         | 1 |
| 9 | 122962406 | 123922585 | - | T                  | 616  | 11 | 0.02 | 219 | 149 | 0.40 | 446 | 85  | 0.16 | 2 | 2 | 2 | tier2 | shared         | 0 |
| 9 | 12372897  | 12382897  | G | C                  | 713  | 7  | 0.01 | 209 | 163 | 0.44 | 353 | 74  | 0.17 | 2 | 2 | 2 | tier3 | shared         | 1 |
| 9 | 124303704 | 125263883 | - | T                  | 629  | 14 | 0.02 | 276 | 189 | 0.41 | 486 | 105 | 0.18 | 2 | 2 | 2 | tier3 | shared         | 0 |
| 9 | 12462110  | 12472110  | A | -                  | 344  | 3  | 0.01 | 70  | 66  | 0.49 | 318 | 95  | 0.23 | 2 | 2 | 2 | tier3 | shared         | 1 |
| 9 | 125239975 | 126200154 | C | T                  | 886  | 13 | 0.01 | 391 | 291 | 0.43 | 664 | 141 | 0.18 | 2 | 2 | 2 | tier3 | shared         | 0 |
| 9 | 130824292 | 131784471 | G | A                  | 407  | 2  | 0.00 | 259 | 78  | 0.23 | 305 | 0   | 0.00 | 2 | 2 | 2 | tier2 | tumor-specific | 1 |

|    |           |           |   |   |      |    |      |     |     |      |     |     |      |   |      |      |       |                  |   |
|----|-----------|-----------|---|---|------|----|------|-----|-----|------|-----|-----|------|---|------|------|-------|------------------|---|
| 9  | 133152891 | 134163070 | C | T | 337  | 3  | 0.01 | 196 | 180 | 0.48 | 226 | 69  | 0.23 | 2 | 2    | 2    | tier3 | shared           | 0 |
| 9  | 134657601 | 135667780 | T | C | 567  | 11 | 0.02 | 248 | 230 | 0.48 | 431 | 118 | 0.21 | 2 | 2    | 2    | tier3 | shared           | 2 |
| 9  | 135068561 | 136078740 | G | A | 792  | 9  | 0.01 | 369 | 287 | 0.44 | 569 | 143 | 0.20 | 2 | 2    | 2    | tier2 | shared           | 0 |
| 9  | 135249598 | 136259777 | C | T | 716  | 12 | 0.02 | 409 | 365 | 0.47 | 465 | 121 | 0.21 | 2 | 2    | 2    | tier3 | shared           | 0 |
| 9  | 20967939  | 20977939  | T | A | 724  | 15 | 0.02 | 327 | 254 | 0.44 | 476 | 125 | 0.21 | 2 | 2    | 2    | tier3 | shared           | 1 |
| 9  | 23653985  | 23663985  | - | A | 608  | 6  | 0.01 | 258 | 162 | 0.39 | 456 | 98  | 0.18 | 2 | 2    | 2    | tier2 | shared           | 0 |
| 9  | 23993511  | 24003511  | G | A | 910  | 16 | 0.02 | 296 | 313 | 0.51 | 534 | 95  | 0.15 | 2 | 2    | 2    | tier2 | shared           | 0 |
| 9  | 24788760  | 24798760  | T | C | 728  | 11 | 0.01 | 269 | 231 | 0.46 | 531 | 129 | 0.20 | 2 | 2    | 2    | tier3 | shared           | 1 |
| 9  | 25271855  | 25281855  | A | T | 669  | 0  | 0.00 | 381 | 1   | 0.00 | 452 | 107 | 0.19 | 2 | 2    | 2    | tier3 | relapse-specific | 1 |
| 9  | 25520654  | 25530654  | G | T | 726  | 5  | 0.01 | 395 | 74  | 0.16 | 563 | 135 | 0.19 | 2 | 2    | 2    | tier3 | shared           | 1 |
| 9  | 25733587  | 25743587  | T | - | 269  | 3  | 0.01 | 56  | 30  | 0.35 | 217 | 29  | 0.12 | 2 | 2    | 2    | tier3 | shared           | 1 |
| 9  | 2715979   | 2725979   | G | A | 614  | 6  | 0.01 | 260 | 186 | 0.42 | 400 | 95  | 0.19 | 2 | 2    | 2    | tier3 | shared           | 0 |
| 9  | 27496041  | 27506041  | - | A | 800  | 8  | 0.01 | 304 | 259 | 0.46 | 476 | 97  | 0.17 | 2 | 2    | 2    | tier3 | shared           | 0 |
| 9  | 30116649  | 30126649  | C | T | 905  | 12 | 0.01 | 342 | 290 | 0.46 | 571 | 117 | 0.17 | 2 | 2    | 2    | tier3 | shared           | 1 |
| 9  | 31824992  | 31834992  | C | T | 895  | 14 | 0.02 | 431 | 415 | 0.49 | 692 | 167 | 0.19 | 2 | 2    | 2    | tier3 | shared           | 1 |
| 9  | 34558623  | 34568623  | G | A | 345  | 3  | 0.01 | 203 | 172 | 0.46 | 249 | 63  | 0.20 | 2 | 2    | 2    | tier2 | shared           | 0 |
| 9  | 37138478  | 37148478  | T | C | 280  | 4  | 0.01 | 116 | 66  | 0.36 | 207 | 52  | 0.20 | 2 | 2    | 2    | tier3 | shared           | 0 |
| 9  | 39132812  | 39142812  | C | G | 541  | 9  | 0.02 | 212 | 180 | 0.46 | 286 | 75  | 0.21 | 2 | 0.77 | 1    | tier3 | shared           | 0 |
| 9  | 39160257  | 39170257  | C | T | 585  | 9  | 0.02 | 168 | 182 | 0.52 | 402 | 92  | 0.19 | 2 | 0.77 | 1    | tier3 | shared           | 0 |
| 9  | 6228687   | 6238687   | G | A | 583  | 15 | 0.03 | 221 | 195 | 0.47 | 308 | 104 | 0.25 | 2 | 2    | 2    | tier3 | shared           | 0 |
| 9  | 74858303  | 75668483  | C | T | 1108 | 12 | 0.01 | 348 | 375 | 0.52 | 631 | 162 | 0.20 | 2 | 2    | 2    | tier3 | shared           | 0 |
| 9  | 75453786  | 76263966  | C | T | 458  | 3  | 0.01 | 206 | 213 | 0.51 | 271 | 62  | 0.19 | 2 | 2    | 2    | tier2 | shared           | 0 |
| 9  | 75857041  | 76667221  | C | T | 879  | 13 | 0.01 | 365 | 325 | 0.47 | 501 | 126 | 0.20 | 2 | 2    | 2    | tier3 | shared           | 1 |
| 9  | 77672764  | 78482944  | A | T | 752  | 10 | 0.01 | 320 | 314 | 0.50 | 449 | 118 | 0.21 | 2 | 2    | 2    | tier3 | shared           | 1 |
| 9  | 81202267  | 82012447  | C | A | 730  | 7  | 0.01 | 349 | 251 | 0.42 | 536 | 101 | 0.16 | 2 | 2    | 2    | tier3 | shared           | 0 |
| 9  | 82369236  | 83179416  | G | A | 260  | 2  | 0.01 | 103 | 74  | 0.42 | 174 | 35  | 0.17 | 2 | 2    | 2    | tier2 | shared           | 0 |
| 9  | 84069279  | 84879459  | G | A | 751  | 9  | 0.01 | 250 | 250 | 0.50 | 474 | 102 | 0.18 | 2 | 2    | 2    | tier3 | shared           | 1 |
| 9  | 87310011  | 88120191  | G | A | 829  | 10 | 0.01 | 374 | 263 | 0.41 | 476 | 110 | 0.19 | 2 | 2    | 2    | tier3 | shared           | 0 |
| 9  | 8780779   | 8790779   | G | T | 351  | 6  | 0.02 | 133 | 104 | 0.44 | 309 | 77  | 0.20 | 2 | 2    | 2    | tier3 | shared           | 1 |
| 9  | 90923638  | 91733818  | C | T | 676  | 15 | 0.02 | 302 | 247 | 0.45 | 538 | 127 | 0.19 | 2 | 2    | 2    | tier3 | shared           | 0 |
| 9  | 92997205  | 93957384  | A | G | 593  | 9  | 0.01 | 245 | 250 | 0.51 | 373 | 92  | 0.20 | 2 | 2    | 2    | tier2 | shared           | 0 |
| 9  | 9326002   | 9336002   | G | A | 588  | 4  | 0.01 | 220 | 150 | 0.41 | 332 | 87  | 0.21 | 2 | 2    | 2    | tier3 | shared           | 1 |
| 9  | 9452332   | 9462332   | G | A | 1002 | 0  | 0.00 | 373 | 98  | 0.21 | 697 | 0   | 0.00 | 2 | 2    | 2    | tier2 | tumor-specific   | 1 |
| 9  | 95020233  | 95980412  | C | A | 255  | 0  | 0.00 | 146 | 132 | 0.47 | 187 | 42  | 0.18 | 2 | 2    | 2    | tier3 | shared           | 1 |
| 9  | 95096259  | 96056438  | G | A | 684  | 4  | 0.01 | 370 | 333 | 0.47 | 442 | 126 | 0.22 | 2 | 2    | 2    | tier3 | shared           | 1 |
| 9  | 95486459  | 96446638  | G | A | 238  | 2  | 0.01 | 118 | 76  | 0.39 | 117 | 26  | 0.18 | 2 | 2    | 2    | tier3 | shared           | 1 |
| 9  | 97513272  | 98473451  | G | A | 974  | 8  | 0.01 | 419 | 314 | 0.43 | 637 | 167 | 0.21 | 2 | 2    | 2    | tier2 | shared           | 0 |
| 9  | 98437138  | 99397317  | T | C | 932  | 12 | 0.01 | 359 | 322 | 0.47 | 570 | 131 | 0.19 | 2 | 2    | 2    | tier3 | shared           | 0 |
| MT | 3919      | -         | G | A | 246  | 1  | 0.00 | 477 | 111 | 0.19 | 23  | 65  | 0.74 | 2 | 2    | 2    | tier1 | shared           | 4 |
| X  | 110124130 | 110237474 | G | A | 485  | 16 | 0.03 | 24  | 360 | 0.94 | 227 | 122 | 0.35 | 2 | 0.97 | 0.98 | tier3 | shared           | 1 |



|   |           |           |     |   |     |    |      |     |     |      |     |     |      |   |      |      |       |                |   |
|---|-----------|-----------|-----|---|-----|----|------|-----|-----|------|-----|-----|------|---|------|------|-------|----------------|---|
| X | 112979355 | 113093090 | A   | - | 273 | 7  | 0.03 | 19  | 172 | 0.90 | 160 | 90  | 0.36 | 2 | 0.97 | 0.98 | tier3 | shared         | 1 |
| X | 113807806 | 113901550 | C   | T | 233 | 5  | 0.02 | 8   | 147 | 0.95 | 145 | 89  | 0.38 | 2 | 0.97 | 0.98 | tier2 | shared         | 0 |
| X | 131787031 | 131959350 | C   | T | 272 | 2  | 0.01 | 22  | 207 | 0.90 | 123 | 85  | 0.41 | 2 | 0.97 | 0.99 | tier3 | shared         | 0 |
| X | 132161919 | 132334253 | C   | T | 350 | 15 | 0.04 | 29  | 190 | 0.87 | 230 | 131 | 0.36 | 2 | 0.97 | 0.99 | tier3 | shared         | 1 |
| X | 133378890 | 133551224 | G   | T | 449 | 15 | 0.03 | 22  | 316 | 0.93 | 235 | 145 | 0.38 | 2 | 0.97 | 0.99 | tier1 | shared         | 6 |
| X | 144715326 | 144907634 | G   | A | 344 | 12 | 0.03 | 28  | 215 | 0.88 | 222 | 147 | 0.40 | 2 | 0.98 | 1    | tier2 | shared         | 0 |
| X | 145019083 | 145211391 | C   | T | 324 | 4  | 0.01 | 14  | 170 | 0.92 | 149 | 84  | 0.36 | 2 | 0.98 | 1    | tier3 | shared         | 1 |
| X | 145600667 | 145792975 | G   | A | 155 | 6  | 0.04 | 14  | 76  | 0.84 | 74  | 50  | 0.40 | 2 | 0.98 | 1    | tier3 | shared         | 1 |
| X | 151560017 | 151809361 | C   | T | 364 | 9  | 0.02 | 26  | 281 | 0.92 | 165 | 123 | 0.43 | 2 | 1.02 | 0.96 | tier3 | shared         | 0 |
| X | 15274686  | 15364765  | C   | G | 278 | 8  | 0.03 | 5   | 115 | 0.96 | 100 | 64  | 0.39 | 2 | 1    | 1    | tier3 | shared         | 0 |
| X | 2427079   | 2417079   | T   | C | 678 | 7  | 0.01 | 209 | 206 | 0.50 | 352 | 112 | 0.24 | 2 | 2    | 2    | tier2 | shared         | 0 |
| X | 27570931  | 27661010  | C   | T | 508 | 15 | 0.03 | 70  | 288 | 0.80 | 273 | 170 | 0.38 | 2 | 1    | 1    | tier2 | shared         | 0 |
| X | 29548786  | 29638865  | A   | G | 189 | 12 | 0.06 | 6   | 92  | 0.94 | 115 | 93  | 0.45 | 2 | 1    | 1    | tier2 | shared         | 0 |
| X | 29962225  | 30052304  | A   | G | 219 | 10 | 0.04 | 16  | 160 | 0.91 | 159 | 104 | 0.40 | 2 | 1    | 1    | tier3 | shared         | 0 |
| X | 40119720  | 40234776  | G   | T | 255 | 8  | 0.03 | 29  | 207 | 0.88 | 142 | 87  | 0.38 | 2 | 1    | 1    | tier3 | shared         | 0 |
| X | 508177    | 588177    | G   | A | 636 | 10 | 0.02 | 276 | 257 | 0.48 | 371 | 89  | 0.19 | 2 | 2    | 2    | tier3 | shared         | 0 |
| X | 79431528  | 79544872  | G   | A | 581 | 6  | 0.01 | 223 | 233 | 0.51 | 440 | 1   | 0.00 | 2 | 0.91 | 0.99 | tier3 | tumor-specific | 0 |
| X | 82891773  | 83005117  | C   | A | 189 | 5  | 0.03 | 8   | 78  | 0.91 | 110 | 51  | 0.32 | 2 | 0.91 | 0.99 | tier3 | shared         | 0 |
| X | 91194846  | 91308190  | C   | G | 239 | 2  | 0.01 | 13  | 92  | 0.88 | 106 | 85  | 0.45 | 2 | 0.41 | 0.9  | tier3 | shared         | 1 |
| X | 91457678  | 91571022  | A   | G | 351 | 3  | 0.01 | 22  | 194 | 0.90 | 189 | 127 | 0.40 | 2 | 0.4  | 0.9  | tier3 | shared         | 1 |
| X | 92968362  | 93081706  | A   | G | 184 | 4  | 0.02 | 5   | 107 | 0.96 | 74  | 53  | 0.42 | 2 | 0.94 | 0.9  | tier3 | shared         | 1 |
| X | 97645952  | 97759296  | C   | T | 137 | 4  | 0.03 | 6   | 84  | 0.93 | 94  | 55  | 0.37 | 2 | 0.94 | 0.9  | tier3 | shared         | 1 |
| X | 9952490   | 9992490   | GGA | - | 112 | 4  | 0.03 | 16  | 85  | 0.84 | 46  | 24  | 0.34 | 2 | 1    | 1    | tier3 | shared         | 0 |
| Y | 27050713  | 28641325  | T   | C | 261 | 7  | 0.03 | 18  | 197 | 0.92 | 129 | 89  | 0.41 | 2 | 2    | 2    | tier3 | shared         | 0 |

**Supplementary Table 7.** Deep readcounts for normal, primary tumor, relapse and FFPE progression samples from UPN 933124.

| Gene          | Chr | Start (NCBI 36) | Start (GRCCh37) | Reference Allele<br>Variant Allele | Normal                     |                          |                   | Tumor                      |                          |                   | ffpe-0915678               |                          |                   | ffpe-0915679               |                          |                   | ffpe-0915680               |                          |                   | Relapse                    |                          |                   | ffpe-0915681               |                          |                   | ffpe-0915682               |                          |                   |
|---------------|-----|-----------------|-----------------|------------------------------------|----------------------------|--------------------------|-------------------|----------------------------|--------------------------|-------------------|----------------------------|--------------------------|-------------------|----------------------------|--------------------------|-------------------|----------------------------|--------------------------|-------------------|----------------------------|--------------------------|-------------------|----------------------------|--------------------------|-------------------|----------------------------|--------------------------|-------------------|
|               |     |                 |                 |                                    | Reference Supporting Reads | Variant Supporting Reads | Variant Frequency | Reference Supporting Reads | Variant Supporting Reads | Variant Frequency | Reference Supporting Reads | Variant Supporting Reads | Variant Frequency | Reference Supporting Reads | Variant Supporting Reads | Variant Frequency | Reference Supporting Reads | Variant Supporting Reads | Variant Frequency | Reference Supporting Reads | Variant Supporting Reads | Variant Frequency | Reference Supporting Reads | Variant Supporting Reads | Variant Frequency | Reference Supporting Reads | Variant Supporting Reads | Variant Frequency |
| <i>PTPRT</i>  | 20  | 40164254        | 40730840        | G A                                | 4060                       | 943                      | 18.85%            | 2506                       | 1952                     | 43.79%            | 22399                      | 2                        | 0.01%             | 21339                      | 200                      | 0.93%             | 11148                      | 113                      | 1.00%             | 2431                       | 1706                     | 41.24%            | 18374                      | 235                      | 1.26%             | 26584                      | 160                      | 0.60%             |
| <i>NPM1</i>   | 5   | 170770150       | 170837545       | 0 TGCA<br>GAAATCAAC<br>GTAGAAGTAC  | 3343                       | 270                      | 7.47%             | 1899                       | 1727                     | 47.63%            | 0                          | 0                        |                   | 5470                       | 0                        | 0.00%             | 3082                       | 1                        | 0.03%             | 1755                       | 1222                     | 41.05%            | 5810                       | 0                        | 0.00%             | 5323                       | 0                        | 0.00%             |
| <i>FLT3</i>   | 13  | 27506273        | 28608273        | 0 TCATTATCTGA                      | 4622                       | 343                      | 6.91%             | 3242                       | 1274                     | 28.21%            | 9242                       | 3                        | 0.03%             | 9296                       | 0                        | 0.00%             | 4890                       | 0                        | 0.00%             | 3469                       | 1415                     | 28.97%            | 9142                       | 0                        | 0.00%             | 8709                       | 0                        | 0.00%             |
| <i>DNMT3A</i> | 2   | 25317018        | 25463514        | A -                                | 3296                       | 762                      | 18.78%            | 1925                       | 1789                     | 48.17%            | 2                          | 3                        |                   | 983                        | 0                        | 0.00%             | 3858                       | 33                       | 0.85%             | 2767                       | 2044                     | 42.49%            | 4348                       | 0                        | 0.00%             | 0                          | 0                        |                   |
| <i>STK4</i>   | 20  | 43115217        | 43681803        | - GAGCGCGGGGC                      | 4848                       | 0                        | 0.00%             | 4078                       | 0                        | 0.00%             | 4943                       | 0                        | 0.00%             | 8011                       | 0                        | 0.00%             | 4817                       | 1                        | 0.02%             | 2668                       | 1427                     | 34.85%            | 4731                       | 0                        | 0.00%             | 11045                      | 0                        | 0.00%             |
| <i>MYO18B</i> | 22  | 24752889        | 26422889        | G A                                | 2702                       | 2                        | 0.07%             | 2728                       | 1                        | 0.04%             | 0                          | 0                        |                   | 0                          | 0                        |                   | 172                        | 1                        | 0.58%             | 808                        | 506                      | 38.51%            | 0                          | 0                        |                   | 627                        | 1                        | 0.16%             |
| <i>ETV6</i>   | 12  | 11883491        | 11992224        | G C                                | 4333                       | 0                        | 0.00%             | 4391                       | 2                        | 0.05%             | 2442                       | 1                        | 0.04%             | 8648                       | 0                        | 0.00%             | 6004                       | 1                        | 0.02%             | 3217                       | 1264                     | 28.21%            | 0                          | 0                        |                   | 0                          | 0                        |                   |

| Sample Id    | Description                           | Day |
|--------------|---------------------------------------|-----|
| tumor        | Presentation, initial diagnosis       | 0   |
| ffpe-0915678 | 1st remission                         | 43  |
| ffpe-0915679 | Continued remission                   | 121 |
| ffpe-0915680 | 30 days post autograft                | 170 |
| relapse      | 1st relapse (sequenced)               | 338 |
| ffpe-0915681 | 2nd remission, 30 days post allograft | 422 |
| ffpe-0915682 | Suspected relapse but no disease      | 501 |
| -            | Death                                 | 750 |

**Supplementary Table 8.** Validated somatic structural variants in all 8 patients. CTX stands for chromosomal translocation.

| ID    | UPN    | Chromosome | Position (NCBI 36) | Position (GRCh 37) | Chromosome | Position (NCBI 36) | Position (GRCh 37) | Event | Normal Read Count | Normal SV Read Count | Relapse Read Count | Relapse SV Read Count | Tumor Read Count | Tumor SV Read Count | Affected Genes |
|-------|--------|------------|--------------------|--------------------|------------|--------------------|--------------------|-------|-------------------|----------------------|--------------------|-----------------------|------------------|---------------------|----------------|
| AML40 | 804168 | 6          | 133155294          | 133196987          | X          | 100458317          | 100344973          | CTX   | N.D.              | N.D.                 | N.D.               | N.D.                  | N.D.             | N.D.                | TMEM35         |
| AML15 | 758168 | 15         | 72113517           | 69900571           | 17         | 35756958           | 32831071           | CTX   | 3696              | 13                   | 5825               | 84                    | 5705             | 98                  | PML RARA       |
| AML15 | 758168 | 15         | 72113430           | 69900484           | 17         | 35756718           | 32830831           | CTX   | 3697              | 19                   | 5829               | 90                    | 5710             | 91                  | PML RARA       |
| AML1  | 933124 | 10         | 28864148           | 28904154           | 12         | 870062             | 740323             | CTX   | 6155              | 0                    | 2079               | 189                   | 2719             | 0                   | WNK1 WAC       |

**Supplementary Table 9. *WNK1* and *WAC* expression in UPN 933124 and other AMLs.**

| PROBESETID      |     |                  | 1555068_at                            | 202940_at                             | 211992_at                             | 211993_at                             | 211994_at                             | 39313_at                              | 217742_s_at                                   | 219679_s_at                                   | 222389_s_at                                   | 222390_at                                     | 242427_at                                     |          |          |
|-----------------|-----|------------------|---------------------------------------|---------------------------------------|---------------------------------------|---------------------------------------|---------------------------------------|---------------------------------------|-----------------------------------------------|-----------------------------------------------|-----------------------------------------------|-----------------------------------------------|-----------------------------------------------|----------|----------|
| Chrom           |     |                  | 12                                    | 12                                    | 12                                    | 12                                    | 12                                    | 12                                    | 10                                            | 10                                            | 10                                            | 10                                            | 10                                            |          |          |
| Start           |     |                  | 732154                                | 859634                                | 732485                                | 732485                                | 732485                                | 859634                                | 28937188                                      | 28862474                                      | 28862439                                      | 28862439                                      | 28867788                                      |          |          |
| Stop            |     |                  | 806924                                | 881560                                | 890879                                | 890879                                | 890879                                | 881409                                | 28949464                                      | 28937366                                      | 28950027                                      | 28950027                                      | 28868526                                      |          |          |
| ANNOTDATE       |     |                  | 40130                                 | 40130                                 | 40130                                 | 40130                                 | 40130                                 | 40130                                 | 40130                                         | 40130                                         | 40130                                         | 40130                                         | 40130                                         |          |          |
| GOLD123_DET_ALL |     |                  | 102                                   | 162                                   | 185                                   | 169                                   | 187                                   | 185                                   | 187                                           | 183                                           | 186                                           | 187                                           | 175                                           |          |          |
| GENETITLE       |     |                  | WNK lysine deficient protein kinase 1 | WW domain containing adaptor with coiled-coil |          |          |
| GENESYMBOL      | FAB | UPN              | WGS                                   | Array                                 | WNK1                                  | WNK1                                  | WNK1                                  | WNK1                                  | WNK1                                          | WNK1                                          | WAC                                           | WAC                                           | WAC                                           | WAC      | WAC      |
| 10474_Signal    | M1  | 933124 (relapse) | 1                                     | 10474                                 | 48                                    | 1010.3                                | 3788.9                                | 257.6                                 | 4541.9                                        | 539.6                                         | 7180.6                                        | 2873                                          | 10657.2                                       | 16503.6  | 919      |
| 10475_Signal    | M1  | 933124 (relapse) | 1                                     | 10475                                 | 135.5                                 | 933                                   | 4686.2                                | 1218.8                                | 4405.7                                        | 665.5                                         | 6417.6                                        | 1936.5                                        | 10298.3                                       | 14850.9  | 561.4    |
| M1_933124_S     | M1  | 933124 (primary) | 1                                     | 7502                                  | 234.1                                 | 890.9                                 | 4481.7                                | 570                                   | 6301.6                                        | 578.4                                         | 7820.8                                        | 4540.3                                        | 13548.5                                       | 23692.6  | 694.6    |
| M0_203_S        | M0  | 203              | 0                                     | 6317                                  | 181.6                                 | 789.2                                 | 9105.9                                | 963.7                                 | 9289                                          | 286.5                                         | 10626.2                                       | 5635.9                                        | 16758.5                                       | 30143.9  | 889.8    |
| M0_DN_128392_S  | M0  | 128392           | 0                                     | 18295                                 | 337.3579                              | 2098.178                              | 13634.25                              | 3064.272                              | 9312.437                                      | 1906.188                                      | 11388.21                                      | 3558.736                                      | 12921.3                                       | 28670.33 | 697.1782 |
| M0_150951_S     | M0  | 150951           | 0                                     | 6324                                  | 264.2                                 | 880.6                                 | 9120.4                                | 1266.9                                | 9934.4                                        | 765.3                                         | 8044.6                                        | 6507.6                                        | 10808.2                                       | 24673.5  | 724      |
| M0_DN_255108_S  | M0  | 255108           | 0                                     | 18249                                 | 209.4357                              | 1692.238                              | 7945.027                              | 1335.014                              | 6226.86                                       | 1440.165                                      | 9882.821                                      | 2697.802                                      | 13489.24                                      | 30816.43 | 364.9267 |
| M0_269542_S     | M0  | 269542           | 0                                     | 9843                                  | 24.8                                  | 1064.3                                | 9236.5                                | 975                                   | 7389.6                                        | 1279.6                                        | 15828.1                                       | 9281.3                                        | 24701                                         | 32453.6  | 1358.1   |
| M0_301733_S     | M0  | 301733           | 0                                     | 7495                                  | 272.7                                 | 776.8                                 | 4872.6                                | 684.4                                 | 9167.8                                        | 630.2                                         | 9153.4                                        | 5374                                          | 19378.3                                       | 28355.1  | 821      |
| M0_DN_303818_S  | M0  | 303818           | 0                                     | 18139                                 | 155.8863                              | 2016.047                              | 15636.62                              | 660.8937                              | 7278.293                                      | 2403.329                                      | 10942.15                                      | 2753.99                                       | 12854                                         | 30244.21 | 871.2317 |
| M0_369065_S     | M0  | 369065           | 0                                     | 7508                                  | 373.9                                 | 1035.2                                | 8002.8                                | 662.1                                 | 10147.9                                       | 1007.1                                        | 10243                                         | 6208.3                                        | 18949.7                                       | 31871.4  | 1873.1   |
| M0_DN_434640_S  | M0  | 434640           | 0                                     | 18155                                 | 285.5829                              | 2167.329                              | 12700.93                              | 4677.531                              | 9726.557                                      | 1895.58                                       | 12784.49                                      | 7681.029                                      | 20474.61                                      | 34778.3  | 643.2431 |
| M0_DN_553863_S  | M0  | 553863           | 0                                     | 18161                                 | 188.0065                              | 1712.504                              | 10989.46                              | 3496.409                              | 8929.919                                      | 1773.129                                      | 11066.56                                      | 5378.261                                      | 16427.71                                      | 32175.45 | 856.0559 |
| M0_692900_S     | M0  | 692900           | 0                                     | 7506                                  | 344.5                                 | 1569.7                                | 9507.9                                | 1356.4                                | 12424.9                                       | 1601.9                                        | 9658                                          | 6255.8                                        | 18015.7                                       | 28298.3  | 552.3    |
| M0_DN_700717_S  | M0  | 700717           | 36                                    | 17999                                 | 439.9295                              | 1296.896                              | 7187.558                              | 1266.527                              | 5787.513                                      | 993.7762                                      | 9859.125                                      | 3108.982                                      | 14453.09                                      | 27981.95 | 683.279  |
| M0_DN_740266_S  | M0  | 740266           | 0                                     | 18200                                 | 175.4029                              | 1185.805                              | 5642.946                              | 961.4573                              | 7166.367                                      | 1325.032                                      | 9952.841                                      | 3201.147                                      | 19761.49                                      | 45293.2  | 646.6891 |
| M1_237_S        | M1  | 237              | 0                                     | 6318                                  | 211.7                                 | 610.4                                 | 5586.8                                | 745.3                                 | 6826.1                                        | 292.4                                         | 7799.9                                        | 5960.3                                        | 13936.2                                       | 22840.7  | 1009.8   |
| M1_245_S        | M1  | 245              | 0                                     | 6319                                  | 252                                   | 881.3                                 | 11895.7                               | 709.8                                 | 9027.5                                        | 962.9                                         | 9972.1                                        | 6836.5                                        | 16486.3                                       | 24260.1  | 1765.5   |
| M1_123172_S     | M1  | 123172           | 3                                     | 6323                                  | 300.2                                 | 913.5                                 | 11811.9                               | 1355.4                                | 7825                                          | 629.8                                         | 8341.9                                        | 3786.3                                        | 11323.6                                       | 26484    | 1584.9   |
| M1_DN_146218_S  | M1  | 146218           | 0                                     | 17908                                 | 120.8386                              | 812.6149                              | 2694.276                              | 192.5788                              | 7536.91                                       | 369.4689                                      | 10353.21                                      | 2382.611                                      | 13872.2                                       | 28466.88 | 280.3309 |
| M1_DN_150288_S  | M1  | 150288           | 0                                     | 17909                                 | 313.0969                              | 672.6077                              | 4215.277                              | 104.7728                              | 9332.337                                      | 626.7845                                      | 13716.7                                       | 1823.647                                      | 9165.47                                       | 27154.64 | 428.02   |
| M1_DN_224143_S  | M1  | 224143           | 21                                    | 17884                                 | 159.8247                              | 1247.712                              | 8277.254                              | 388.8837                              | 5416.232                                      | 1736.016                                      | 8058.069                                      | 2342.995                                      | 21194.94                                      | 37306.98 | 352.9152 |
| M1_274429_S     | M1  | 274429           | 0                                     | 9615                                  | 336.5                                 | 1800.4                                | 15063.6                               | 915.8                                 | 9226                                          | 1749.5                                        | 8240.2                                        | 5485.5                                        | 18944.2                                       | 22838.9  | 1150.9   |

|                |    |        |    |       |          |          |          |          |          |          |          |          |          |          |          |
|----------------|----|--------|----|-------|----------|----------|----------|----------|----------|----------|----------|----------|----------|----------|----------|
| M1_DN_322110_S | M1 | 322110 | 0  | 18141 | 364.9119 | 1964.852 | 9332.337 | 854.2581 | 5458.711 | 2225.206 | 10177.39 | 3082.667 | 13916.56 | 28333.77 | 907.0831 |
| M1_327733_S    | M1 | 327733 | 8  | 7494  | 439.9    | 829.6    | 5758.6   | 422.5    | 10524.3  | 573.4    | 11477.5  | 4070.2   | 16979    | 29272    | 1636.3   |
| M1_DN_329614_S | M1 | 329614 | 0  | 18144 | 252.0226 | 1475.253 | 9324.862 | 468.3089 | 7254.854 | 1557.042 | 11568.99 | 4809.68  | 13783.85 | 27147.65 | 529.9066 |
| M1_DN_332131_S | M1 | 332131 | 0  | 18145 | 173.8162 | 1396.815 | 7226.608 | 1928.542 | 7032.914 | 1781.035 | 9951.247 | 3503.114 | 17426.95 | 35489.25 | 522.0771 |
| M1_DN_345701_S | M1 | 345701 | 0  | 18153 | 192.1423 | 1698.466 | 7973.384 | 2603.648 | 6725.827 | 1459.619 | 11871.55 | 4566.05  | 16810.6  | 26797.35 | 854.4272 |
| M1_DN_431799_S | M1 | 431799 | 0  | 18302 | 295.3505 | 2281.047 | 12540.08 | 3304.758 | 8696.631 | 2334.165 | 10163.48 | 5677.109 | 16527.67 | 32493.83 | 775.3183 |
| M1_DN_498463_S | M1 | 498463 | 0  | 18157 | 368.4572 | 1534.016 | 9837.924 | 3198.663 | 8819.531 | 1403.654 | 11422.15 | 6877.058 | 17677.79 | 39386.98 | 373.2515 |
| M1_509733_S    | M1 | 509733 | 0  | 6339  | 228.4    | 1428.9   | 7763.6   | 770.9    | 9527.9   | 746.8    | 9005.7   | 6709     | 13564.2  | 40511.7  | 3725.4   |
| M1_509754_S    | M1 | 509754 | 7  | 9681  | 214.6    | 3076.8   | 9973     | 1255.6   | 7468.3   | 2308.4   | 8504     | 5484.3   | 18494.9  | 21244.8  | 913.4    |
| M1_DN_514066_S | M1 | 514066 | 0  | 18159 | 224.9354 | 866.6609 | 4371.716 | 1352.562 | 3433.054 | 760.9903 | 5024.978 | 954.5438 | 4517.188 | 15936.58 | 758.7257 |
| M1_DN_545259_S | M1 | 545259 | 33 | 17887 | 371.1495 | 1250.217 | 5931.742 | 233.8909 | 11457.55 | 1450.679 | 10393.62 | 3207.204 | 20876.06 | 37680.33 | 214.8386 |
| M1_DN_548327_S | M1 | 548327 | 34 | 17888 | 355.2929 | 1172.333 | 5415.614 | 210.7637 | 5589.42  | 1842.144 | 8664.344 | 1021.76  | 15202.87 | 34165.65 | 358.3484 |
| M1_585686_S    | M1 | 585686 | 0  | 10569 | 286.2    | 581.4    | 7525.2   | 441.2    | 7932.3   | 714      | 11308    | 4947.3   | 16032.9  | 29333.2  | 1815.1   |
| M1_DN_594368_S | M1 | 594368 | 0  | 18162 | 164.6125 | 951.3661 | 7328.222 | 1661.051 | 6055.692 | 962.0799 | 11435.39 | 4508.005 | 13859.28 | 24486.05 | 528.5656 |
| M1_633734_S    | M1 | 633734 | 0  | 9680  | 157.3    | 1478.3   | 10049    | 1362.5   | 6548.6   | 1304.4   | 8320.6   | 1613     | 15629.1  | 25125.3  | 1487.3   |
| M1_DN_721214_S | M1 | 721214 | 0  | 18197 | 223.2367 | 1281.503 | 6606.438 | 894.2997 | 8515.674 | 1158.695 | 7603.25  | 3415.395 | 16701.77 | 31504.38 | 418.8472 |
| M1_DN_804168_S | M1 | 804168 | 40 | 18256 | 238.2037 | 747.8181 | 1993.612 | 108.1187 | 3869.892 | 480.9968 | 8698.378 | 1216.218 | 16143.75 | 37733.77 | 148.4671 |
| M1_807615_S    | M1 | 807615 | 0  | 6336  | 303.6    | 443.4    | 10805.5  | 738.3    | 7422.6   | 398.3    | 9561.6   | 3727.3   | 14621.2  | 28159.1  | 1528.6   |
| M1_807970_S    | M1 | 807970 | 2  | 11416 | 365.7    | 1910.7   | 6697.7   | 2227.4   | 6456.1   | 1579.5   | 10314.8  | 7595.8   | 15397.5  | 27308.8  | 837      |
| M1_808642_S    | M1 | 808642 | 6  | 11423 | 228.7    | 1557     | 7639.4   | 2229.4   | 7179.4   | 1005.5   | 8953.2   | 7777.3   | 17172.4  | 25192.1  | 513.6    |
| M1_DN_809653_S | M1 | 809653 | 0  | 18204 | 538.5926 | 1663.616 | 14671.64 | 1524.789 | 12560.35 | 1808.433 | 8711.613 | 3949.24  | 14930.13 | 37404.36 | 215.959  |
| M1_831711_S    | M1 | 831711 | 4  | 13067 | 445.7    | 1715.4   | 11648.8  | 3970.7   | 7152.5   | 1442.1   | 8545.3   | 6960.4   | 13136.1  | 18093.3  | 1842.4   |
| M1_849660_S    | M1 | 849660 | 5  | 10567 | 428      | 1576.2   | 13333.1  | 1287.6   | 9929.2   | 960.9    | 10174.7  | 5008     | 18607    | 31296.5  | 368.1    |
| M1_DN_851929_S | M1 | 851929 | 0  | 18205 | 298.8251 | 1872.241 | 8525.545 | 1329.118 | 9606.269 | 2008.704 | 7726.361 | 2956.381 | 15253.98 | 36009.25 | 373.3518 |
| M1_852559_S    | M1 | 852559 | 0  | 9847  | 244.5    | 499.3    | 4277.7   | 605.7    | 3069.4   | 634.3    | 9964.5   | 5661.6   | 16487.5  | 26977.1  | 353.1    |
| M1_974749_S    | M1 | 974749 | 0  | 6338  | 180.2    | 659.5    | 7882.6   | 598.2    | 9641.7   | 439.4    | 10308.4  | 4767.6   | 18426.5  | 34548    | 1187.3   |
| M1_975684_S    | M1 | 975684 | 0  | 9692  | 473.3    | 1033.1   | 10218.5  | 712.2    | 8707.9   | 392.9    | 11620    | 8618     | 22975.8  | 31083.3  | 2212.6   |
| M1_DN_982009_S | M1 | 982009 | 0  | 18209 | 296.8021 | 1991.445 | 8105.772 | 1279.763 | 6883.345 | 1714.108 | 10025.76 | 3355.945 | 14249.85 | 25050.8  | 397.7517 |
| M1_984036_S    | M1 | 984036 | 0  | 9695  | 16       | 1954.2   | 11892.4  | 707.7    | 8093.6   | 1049.1   | 13792.7  | 7540.6   | 15554    | 15957.7  | 1056.6   |
| M1_DN_987523_S | M1 | 987523 | 0  | 18210 | 346.1815 | 1750.396 | 8253.029 | 930.3145 | 10231.85 | 1380.556 | 15176.66 | 6236.029 | 20737.16 | 45510.34 | 459.6495 |
| M1_989176_S    | M1 | 989176 | 0  | 13066 | 162.5    | 1346.3   | 7842.6   | 2552.8   | 4709.8   | 1239.8   | 10155.8  | 6314.6   | 11287.8  | 15007.3  | 2330.1   |
| M1_992966_S    | M1 | 992966 | 0  | 9686  | 106.5    | 1539     | 8455.1   | 719.7    | 6607.2   | 812.9    | 9222     | 5808.7   | 19008.9  | 20500.2  | 2810.4   |
| M2_269_S       | M2 | 269    | 0  | 6320  | 285.8    | 1485     | 11721.5  | 1261     | 9075.3   | 1179.6   | 8988     | 3330     | 15012.5  | 29690.5  | 2538.9   |
| M2_295_S       | M2 | 295    | 0  | 9833  | 62.7     | 1041.2   | 12254    | 854.1    | 5526.7   | 895.2    | 10760.8  | 4652.3   | 25872.3  | 17346.7  | 2571.5   |
| M2_DN_103342_S | M2 | 103342 | 17 | 17903 | 222.679  | 1921.984 | 13254.17 | 419.9704 | 6933.246 | 2095.438 | 10593.84 | 2200.195 | 8799.323 | 26331.66 | 620.1928 |
| M2_104851_S    | M2 | 104851 | 0  | 7500  | 199.4    | 939.6    | 6705.2   | 472.6    | 6353.1   | 630.7    | 9285.4   | 4803.4   | 13911.8  | 25816.9  | 1970.3   |
| M2_108135_S    | M2 | 108135 | 0  | 6322  | 437.5    | 314.7    | 7777.1   | 980.4    | 7735.2   | 630.5    | 8127.8   | 5817.1   | 13762.4  | 29452.4  | 1888.8   |

|                |    |        |    |       |          |          |          |          |          |          |          |          |          |          |          |
|----------------|----|--------|----|-------|----------|----------|----------|----------|----------|----------|----------|----------|----------|----------|----------|
| M2_DN_113971_S | M2 | 113971 | 18 | 17904 | 294.4258 | 1380.519 | 13211.43 | 668.8361 | 9333.999 | 1836.447 | 12320.71 | 3344.677 | 17388.44 | 39022.54 | 769.0372 |
| M2_DN_141273_S | M2 | 141273 | 0  | 17907 | 307.866  | 624.179  | 2378.408 | 115.2654 | 7143.087 | 498.2436 | 10475.83 | 1299.001 | 8432.677 | 25527.86 | 217.7442 |
| M2_DN_179223_S | M2 | 179223 | 20 | 18297 | 733.7283 | 3921.41  | 24776.29 | 4638.933 | 16065.52 | 4134.074 | 9817.859 | 2934.904 | 11657.97 | 32138.01 | 598.0331 |
| M2_195182_S    | M2 | 195182 | 0  | 9694  | 301.5    | 2186.4   | 11297.2  | 1085.9   | 7554.5   | 1732.2   | 11207.6  | 7335.6   | 19236.7  | 17724    | 1120.5   |
| M2_208027_S    | M2 | 208027 | 0  | 7491  | 233.2    | 825.3    | 6394.7   | 779.9    | 7752.5   | 814.5    | 9172.3   | 4742.4   | 16939.6  | 25717    | 778.4    |
| M2_DN_225373_S | M2 | 225373 | 22 | 18299 | 353.0934 | 2355.579 | 11154.66 | 4090.698 | 4678.386 | 3483.011 | 8595.87  | 3985.495 | 7551.571 | 34426.18 | 861.6507 |
| M2_DN_237983_S | M2 | 237983 | 0  | 18065 | 215.4335 | 1471.566 | 8102.6   | 433.8173 | 7174.515 | 1307.663 | 10442.72 | 5428.332 | 25069.8  | 48461.47 | 486.5141 |
| M2_DN_254137_S | M2 | 254137 | 24 | 18300 | 589.4583 | 1663.529 | 11370.11 | 2987.072 | 6589.971 | 2230.312 | 9924.67  | 3338.357 | 13187.69 | 35332.72 | 299.0573 |
| M2_DN_258135_S | M2 | 258135 | 0  | 18135 | 279.9937 | 1876.756 | 10245.74 | 706.2094 | 6229.453 | 1736.92  | 10257.28 | 1933.507 | 15189.94 | 35437.57 | 577.9929 |
| M2_263578_S    | M2 | 263578 | 0  | 6327  | 175.2    | 932.4    | 9403.1   | 1031.7   | 5922.4   | 753.4    | 9022.7   | 4112.7   | 14356.8  | 24231.4  | 1689.2   |
| M2_273919_S    | M2 | 273919 | 25 | 11420 | 161.9    | 964.1    | 6925.5   | 1309.3   | 7652.5   | 604.7    | 12694.1  | 5579.9   | 17170.2  | 23798.4  | 276.9    |
| M2_DN_275786_S | M2 | 275786 | 0  | 18136 | 112.5518 | 814.0866 | 5938.358 | 556.1102 | 6268.059 | 684.1697 | 11020.74 | 4232.395 | 13989.4  | 25664.36 | 905.877  |
| M2_312340_S    | M2 | 312340 | 0  | 6330  | 475.9    | 2228.5   | 25269.9  | 5325.8   | 13938.3  | 2895.2   | 7685.1   | 5251.4   | 10238.6  | 36838.6  | 1649.6   |
| M2_DN_319955_S | M2 | 319955 | 0  | 18140 | 160.4172 | 1703.69  | 12465.34 | 648.331  | 6378.901 | 1975.426 | 10198.81 | 3414.519 | 14815.94 | 37117.08 | 1155.471 |
| M2_DN_325028_S | M2 | 325028 | 0  | 18142 | 35.26897 | 107.0832 | 3622.571 | 1872.624 | 7903.494 | 83.90916 | 5263.366 | 2344.235 | 3809.394 | 7804.083 | 1462.932 |
| M2_DN_326772_S | M2 | 326772 | 0  | 18143 | 433.4755 | 2032.103 | 17108.93 | 1585.088 | 8442.276 | 2454.814 | 13060.77 | 2995.114 | 16984.61 | 30155.81 | 659.4302 |
| M2_DN_400830_S | M2 | 400830 | 0  | 18146 | 221.6867 | 1715.022 | 7108.592 | 2676.946 | 8518.752 | 2075.743 | 9803.715 | 3185.288 | 20102.41 | 39694.98 | 483.2742 |
| M2_426980_S    | M2 | 426980 | 28 | 9693  | 471.4    | 1269.5   | 12142.7  | 1325.3   | 6399.7   | 1050.2   | 10934.7  | 7248.2   | 18471.4  | 22685.1  | 868      |
| M2_432398_S    | M2 | 432398 | 0  | 9834  | 502.5    | 1489.5   | 14902.1  | 1174.7   | 8270.6   | 1599.7   | 10968.8  | 7325.9   | 20562.4  | 24621.3  | 736.8    |
| M2_433325_S    | M2 | 433325 | 0  | 7501  | 441.6    | 847.6    | 5895.7   | 549.4    | 9189     | 899.5    | 8687.9   | 5873.3   | 15542.6  | 29380.4  | 821      |
| M2_445045_S    | M2 | 445045 | 30 | 11413 | 381.7    | 1558.5   | 8996.7   | 1857.7   | 10011.5  | 1275.6   | 8595.1   | 4565.4   | 14994    | 25297.7  | 484.1    |
| M2_DN_463352_S | M2 | 463352 | 0  | 18148 | 74.30852 | 1063.859 | 5172.884 | 2240.176 | 5964.897 | 1044.192 | 10111.39 | 4348.464 | 15450.05 | 33733.81 | 442.9827 |
| M2_570755_S    | M2 | 570755 | 0  | 9689  | 397.2    | 1800.1   | 12150    | 1190     | 7450     | 1690.6   | 7357.2   | 4487     | 15975.3  | 17679.6  | 930.7    |
| M2_593890_S    | M2 | 593890 | 0  | 11418 | 157.6    | 2133.7   | 13766.8  | 2369.5   | 10660.2  | 1784.8   | 11245.9  | 5027.3   | 17528.5  | 28703.6  | 1039.3   |
| M2_606061_S    | M2 | 606061 | 0  | 6334  | 278      | 1045.6   | 14031.4  | 2231     | 8416.5   | 785.8    | 10591.6  | 3087.8   | 17765.9  | 47834.6  | 3093.6   |
| M2_631879_S    | M2 | 631879 | 0  | 7660  | 271.5    | 1848.1   | 8617.7   | 880      | 9810.8   | 1111.6   | 9248.7   | 1541.2   | 3664.9   | 13171    | 527.7    |
| M2_645137_S    | M2 | 645137 | 0  | 6335  | 188.1    | 542      | 6962.2   | 919.5    | 6389.2   | 377.8    | 8168.6   | 5649.4   | 12811.1  | 29167.9  | 3039.3   |
| M2_724606_S    | M2 | 724606 | 0  | 7496  | 110.1    | 783.8    | 6456.5   | 756      | 11873.7  | 1046.4   | 10396    | 6240.6   | 20563.2  | 24177.4  | 1599.6   |
| M2_DN_750152_S | M2 | 750152 | 0  | 17906 | 239.746  | 764.121  | 1823.447 | 172.6131 | 6218.667 | 425.0748 | 13352.94 | 1908.394 | 10681.66 | 30876.63 | 368.7142 |
| M2_DN_753374_S | M2 | 753374 | 38 | 18001 | 1026.111 | 3950.896 | 34523.55 | 7055.504 | 8598.931 | 5803.497 | 7967.284 | 2576.297 | 16115.41 | 34741.75 | 524.3723 |
| M2_767545_S    | M2 | 767545 | 0  | 7507  | 349.6    | 573      | 10520.2  | 651      | 15201.9  | 1016.2   | 14820.3  | 4328.2   | 14666.8  | 26093.3  | 915      |
| M2_DN_817156_S | M2 | 817156 | 42 | 18004 | 422.7896 | 2394.738 | 10016.21 | 1493.606 | 6026.755 | 2105.374 | 7436.253 | 2519.357 | 9366.108 | 29397.59 | 847.1683 |
| M2_DN_869922_S | M2 | 869922 | 0  | 18352 | 169.955  | 1798.372 | 8773.453 | 1286.165 | 7328.188 | 1924.781 | 9388.569 | 2250.6   | 13170.16 | 31565.54 | 553.166  |
| M2_905179_S    | M2 | 905179 | 0  | 9679  | 215.8    | 1753     | 6427.6   | 832.1    | 5720.7   | 1143.2   | 8623.8   | 4618.8   | 14176.9  | 18843    | 647.6    |
| M2_936028_S    | M2 | 936028 | 0  | 10568 | 231      | 315.4    | 8120.8   | 645.8    | 5996.5   | 880.6    | 9722.9   | 5028.4   | 17744.9  | 22024.1  | 787.4    |
| M2_991612_S    | M2 | 991612 | 46 | 11421 | 173.7    | 2186.1   | 14565.6  | 2086.4   | 12037.9  | 2113.6   | 10596.7  | 7016.8   | 15785.8  | 21245    | 410.3    |
| M2_DN_997292_S | M2 | 997292 | 0  | 18212 | 155.909  | 1007.987 | 11979.28 | 2138.391 | 8768.985 | 1105.695 | 9445.41  | 5046.131 | 18665.88 | 34916.32 | 1545.518 |

|                |    |        |    |       |          |          |          |          |          |          |          |          |          |          |          |
|----------------|----|--------|----|-------|----------|----------|----------|----------|----------|----------|----------|----------|----------|----------|----------|
| M3_110_S       | M3 | 110    | 0  | 7490  | 192.3    | 998      | 3062.6   | 222.3    | 4392.9   | 1362.7   | 7632.3   | 1302.3   | 19051.3  | 27264.2  | 381.8    |
| M3_201_S       | M3 | 201    | 0  | 7493  | 688.2    | 1947.8   | 14700.4  | 1888.1   | 19255    | 1786.4   | 11717.4  | 3735.1   | 13787.6  | 25461.1  | 1604.4   |
| M3_287_S       | M3 | 287    | 0  | 7499  | 283.8    | 1339.5   | 5026.5   | 1916.5   | 4856.4   | 1573.9   | 8471.3   | 3019.7   | 14775.3  | 32169.8  | 860.9    |
| M3_DN_179016_S | M3 | 179016 | 0  | 18062 | 364.8046 | 2769.113 | 12212.13 | 929.988  | 7185.734 | 3772.508 | 8484.663 | 2252.138 | 7122.859 | 21132.51 | 425.1876 |
| M3_DN_202127_S | M3 | 202127 | 48 | 17883 | 185.6835 | 951.1861 | 4710.347 | 225.4786 | 5853.682 | 700.1725 | 8810.556 | 2955.147 | 18923.58 | 35861.98 | 218.8984 |
| M3_291696_S    | M3 | 291696 | 0  | 11415 | 90.1     | 511.3    | 4689.9   | 1397.2   | 5598.4   | 526.3    | 11084.9  | 8291.7   | 16214.8  | 26840.4  | 479.6    |
| M3_321258_S    | M3 | 321258 | 14 | 10572 | 302.4    | 904.7    | 9067.5   | 1340.4   | 8875.2   | 1229.4   | 10814.3  | 4794.8   | 13311    | 32057.5  | 556.6    |
| M3_344551_S    | M3 | 344551 | 12 | 9684  | 68.5     | 3489.7   | 38025.2  | 5247.4   | 7349.1   | 3146.8   | 5448.1   | 7001.3   | 11027.2  | 12322.7  | 4911.6   |
| M3_447649_S    | M3 | 447649 | 0  | 6333  | 231.6    | 1196.9   | 9809.7   | 829.5    | 5617.2   | 879.4    | 7537.5   | 3726.2   | 12553.5  | 31749.6  | 2430.1   |
| M3_DN_455499_S | M3 | 455499 | 16 | 17885 | 27.19196 | 716.2982 | 4391.995 | 293.468  | 5782.356 | 1032.779 | 8794.956 | 979.5588 | 19616.3  | 42292.28 | 113.7817 |
| M3_DN_478908_S | M3 | 478908 | 11 | 17886 | 307.5625 | 693.0395 | 4465.168 | 211.8602 | 6911.58  | 1119.865 | 9556.377 | 1466.697 | 13744.03 | 38161.46 | 196.6484 |
| M3_501944_S    | M3 | 501944 | 50 | 7509  | 404.8    | 996.6    | 3993.3   | 577      | 6218.6   | 488      | 12121.4  | 5250.5   | 16046.9  | 26474.8  | 746.1    |
| M3_537782_S    | M3 | 537782 | 0  | 6340  | 190.5    | 1643     | 6416.9   | 824      | 3680.8   | 1003.8   | 8626.3   | 1113.3   | 17768.2  | 44008.7  | 2048.8   |
| M3_575512_S    | M3 | 575512 | 0  | 9850  | 197.9    | 1438.1   | 7673.1   | 1072.3   | 6771.3   | 989.3    | 11306    | 6197.6   | 19420.8  | 23006.2  | 461      |
| M3_673778_S    | M3 | 673778 | 13 | 9614  | 456.4    | 1126.6   | 8504.8   | 960      | 6054.8   | 1189.6   | 10543    | 5987.9   | 20629.6  | 23437.8  | 1470.4   |
| M3_709968_S    | M3 | 709968 | 9  | 9685  | 246.4    | 1641.3   | 10100.6  | 1583.9   | 6917.1   | 2279     | 8255.9   | 5136.6   | 14585.4  | 16044    | 1663.1   |
| M3_731274_S    | M3 | 731274 | 0  | 7498  | 241.8    | 676      | 6542.9   | 575.1    | 5319.3   | 709.5    | 9921.2   | 4666.4   | 11153.6  | 23968    | 956.3    |
| M3_DN_757199_S | M3 | 757199 | 0  | 18201 | 180.4966 | 1703.116 | 5026.221 | 792.197  | 5304.673 | 2141.594 | 8784.884 | 2995.03  | 15241.12 | 29581.97 | 648.4532 |
| M3_DN_758168_S | M3 | 758168 | 15 | 17996 | 481.3824 | 2563.299 | 13692.1  | 3514.812 | 9908.357 | 2894.811 | 8824.983 | 3789.13  | 7107.854 | 26634.54 | 1057.962 |
| M3_863018_S    | M3 | 863018 | 10 | 9678  | 607.7    | 1764.9   | 12297.2  | 1745.1   | 5987.2   | 1401.7   | 7826.9   | 4189.2   | 10009.6  | 16363    | 2046.4   |
| M3_943309_S    | M3 | 943309 | 51 | 11414 | 253.1    | 1379.4   | 7760.6   | 1531     | 7160.8   | 1255.6   | 10671.3  | 6107.7   | 16313.1  | 26078.8  | 519.5    |
| M3_964886_S    | M3 | 964886 | 0  | 9691  | 406.9    | 1630.2   | 7830.9   | 599.1    | 4984.4   | 1439.2   | 8511.3   | 5517.6   | 14313    | 17749.2  | 1041.8   |
| M4_104_S       | M4 | 104    | 0  | 7492  | 67.9     | 1871.5   | 7031.1   | 1922.2   | 7344.2   | 1468     | 9222.1   | 3314.2   | 17763.8  | 31433.5  | 742.2    |
| M4_296_S       | M4 | 296    | 0  | 7497  | 1055.8   | 1078.5   | 6093.3   | 1159.3   | 3572.3   | 1465.2   | 18332.8  | 6328.3   | 29601.7  | 37857.3  | 1034.9   |
| M4_DN_142074_S | M4 | 142074 | 19 | 18248 | 177.8048 | 238.4344 | 2419.492 | 165.9711 | 6400.701 | 477.9228 | 10028.75 | 1006.573 | 10781.75 | 26992.68 | 228.4113 |
| M4_147796_S    | M4 | 147796 | 0  | 10570 | 286.7    | 741.8    | 9800.2   | 1161.4   | 9064.8   | 775.5    | 8740.6   | 5501.3   | 17678.9  | 31419.3  | 565.3    |
| M4_156704_S    | M4 | 156704 | 0  | 7503  | 274.6    | 985.7    | 5762.7   | 671.8    | 7640.8   | 806.8    | 9137.5   | 5827.5   | 14980.9  | 23590.3  | 460.3    |
| M4_186481_S    | M4 | 186481 | 0  | 6325  | 339.6    | 914.3    | 12790    | 1594.5   | 9357.4   | 1205.7   | 9128.9   | 5419.7   | 13799    | 40197.9  | 2453.3   |
| M4_DN_242129_S | M4 | 242129 | 0  | 18066 | 259.9712 | 1615.383 | 11404.71 | 951.2936 | 6741.534 | 1995.837 | 8654.776 | 2762.217 | 18527.45 | 29698.29 | 677.2202 |
| M4_DN_245450_S | M4 | 245450 | 0  | 18133 | 156.0679 | 1853.058 | 11599.71 | 839.1526 | 6460.999 | 1764.488 | 8541.882 | 3552.499 | 9424.779 | 27580.9  | 771.9271 |
| M4_DN_246634_S | M4 | 246634 | 23 | 18292 | 248.5161 | 2429.97  | 8389.955 | 4312.611 | 5875.258 | 3603.542 | 6684.762 | 2529.815 | 6121.092 | 13730.06 | 3394.922 |
| M4_DN_290344_S | M4 | 290344 | 0  | 18137 | 572.208  | 1887.783 | 15487.05 | 567.5286 | 8429.751 | 2176.061 | 10275.29 | 2440.128 | 11217.38 | 34296.18 | 829.1417 |
| M4_311636_S    | M4 | 311636 | 0  | 6329  | 389      | 1139.2   | 13145.3  | 1409.6   | 6877.4   | 1350     | 8626.8   | 2174.3   | 15366.3  | 32379.4  | 2629.3   |
| M4_318433_S    | M4 | 318433 | 0  | 6331  | 157.3    | 888.2    | 9898.7   | 1079.9   | 10039.6  | 832.4    | 7216.3   | 4900     | 13605.2  | 26475.8  | 1181.6   |
| M4_346190_S    | M4 | 346190 | 0  | 9690  | 40.2     | 1899.2   | 12010.2  | 1388     | 9894.4   | 1452.6   | 8041.2   | 4884.8   | 17424.6  | 22063.2  | 522.4    |
| M4_399253_S    | M4 | 399253 | 0  | 6332  | 303.7    | 631.6    | 11992.1  | 1044.6   | 9732.1   | 578.5    | 6923     | 5056.5   | 14633    | 31246.2  | 2773     |
| M4_DN_400220_S | M4 | 400220 | 27 | 18252 | 117.6743 | 969.6259 | 3198.232 | 336.8893 | 7646.584 | 739.0547 | 13315.22 | 971.3914 | 10493.86 | 26441.99 | 305.9138 |

|                |    |        |    |       |          |          |          |          |          |          |          |          |          |          |          |
|----------------|----|--------|----|-------|----------|----------|----------|----------|----------|----------|----------|----------|----------|----------|----------|
| M4_407992_S    | M4 | 407992 | 0  | 7504  | 175.5    | 1135.8   | 4307.2   | 778.6    | 8656.8   | 1110.2   | 11539.7  | 3762.9   | 21025.6  | 33897    | 420.7    |
| M4_418499_S    | M4 | 418499 | 0  | 9688  | 347      | 1758.9   | 12652.8  | 1544.4   | 7542.6   | 1837.2   | 8334.2   | 5135.3   | 19718.4  | 23544.6  | 1131     |
| M4_DN_456892_S | M4 | 456892 | 32 | 17998 | 311.7274 | 2429.461 | 18094.69 | 1776.541 | 8723.532 | 2622.059 | 9684.902 | 2737.108 | 12592.16 | 27196.32 | 701.7245 |
| M4_DN_470690_S | M4 | 470690 | 0  | 18156 | 153.6104 | 1729.907 | 9811.791 | 2209.689 | 6641.052 | 1760.971 | 9799.106 | 2474.224 | 13151.12 | 29907.73 | 372.4909 |
| M4_DN_499294_S | M4 | 499294 | 0  | 18158 | 235.9749 | 2479.028 | 14802.56 | 5884.622 | 7894.809 | 3421.951 | 9591.951 | 3582.292 | 16488.38 | 34495.57 | 454.3971 |
| M4_DN_507696_S | M4 | 507696 | 0  | 18150 | 163.4631 | 1109.636 | 6290.904 | 1690.298 | 7268.49  | 1077.837 | 10413.6  | 3849.227 | 16551.59 | 35578.49 | 389.7811 |
| M4_558395_S    | M4 | 558395 | 0  | 7505  | 193.5    | 971.7    | 4543.1   | 332.6    | 6305.1   | 600.3    | 10718.9  | 5855.5   | 16775.8  | 25048.1  | 724.5    |
| M4_DN_573988_S | M4 | 573988 | 35 | 18349 | 286.1372 | 2122.334 | 15210.6  | 2440.782 | 8094.373 | 2498.551 | 12573.04 | 2373.186 | 13974.6  | 27695.25 | 566.6025 |
| M4_DN_595704_S | M4 | 595704 | 0  | 18152 | 352.753  | 1557.398 | 8061.158 | 2128.626 | 7385.268 | 1875.458 | 9297.394 | 2813.257 | 13060.14 | 35955.54 | 632.6037 |
| M4_619751_S    | M4 | 619751 | 0  | 9687  | 15.7     | 2040.2   | 10000.8  | 892.1    | 6268     | 1557.4   | 7908.7   | 5205.8   | 17540.5  | 18864.3  | 1270.9   |
| M4_670224_S    | M4 | 670224 | 0  | 9683  | 473.6    | 1737.2   | 10672.1  | 873.4    | 5977.6   | 1279.9   | 6991     | 5586.4   | 15680.3  | 17912.4  | 2472.1   |
| M4_DN_671473_S | M4 | 671473 | 0  | 18350 | 252.6257 | 1979.9   | 11537.32 | 2040.129 | 6886.659 | 2196.807 | 12433.04 | 1979.384 | 14170.07 | 29432.66 | 760.5497 |
| M4_DN_708512_S | M4 | 708512 | 0  | 18293 | 158.0512 | 2356.27  | 11498.36 | 3510.269 | 5033.363 | 3420.434 | 9640.479 | 1905.093 | 17291.78 | 29778.26 | 784.9251 |
| M4_818119_S    | M4 | 818119 | 0  | 10892 | 253.3    | 1068.1   | 8071.8   | 644      | 8776.4   | 946.6    | 9416.4   | 7907     | 17827.5  | 23983.3  | 732.4    |
| M4_826984_S    | M4 | 826984 | 0  | 6337  | 498.3    | 2251.2   | 25291.3  | 1642.6   | 15568    | 1873.9   | 9417.2   | 2900.1   | 14484    | 28924.2  | 1861.8   |
| M4_DN_862507_S | M4 | 862507 | 0  | 11422 | 382.7016 | 1755.717 | 7357.426 | 1469.206 | 7488.974 | 1306.779 | 10090.44 | 3036.406 | 13358.11 | 31073.83 | 368.8578 |
| M4_868231_S    | M4 | 868231 | 0  | 11412 | 260.8    | 1825.8   | 8530.7   | 3871.6   | 6980.7   | 1388.1   | 8381.9   | 6401     | 15194.7  | 22767.5  | 419.5    |
| M4_869586_S    | M4 | 869586 | 43 | 10571 | 541      | 1550.3   | 7216.4   | 1006.9   | 7847.6   | 1054     | 8331.7   | 3857.5   | 11730.8  | 25055.4  | 1104.9   |
| M4_DN_906708_S | M4 | 906708 | 44 | 18005 | 486.0807 | 2217.347 | 11241.95 | 1690.291 | 6572.17  | 2619.495 | 7732.25  | 2539.878 | 12818.22 | 32262.08 | 897.5732 |
| M4_DN_944281_S | M4 | 944281 | 0  | 18208 | 378.0195 | 2284.824 | 6245.841 | 1914.271 | 5906.933 | 3054.38  | 6536.208 | 1221.701 | 6378.615 | 30076.44 | 630.7974 |
| M4_DN_962561_S | M4 | 962561 | 0  | 11424 | 209.6312 | 1228.837 | 7231.026 | 1576.569 | 6596.596 | 1390.842 | 8763.858 | 4177.362 | 17618.23 | 28114.25 | 897.491  |
| M5_DN_180168_S | M5 | 180168 | 0  | 18063 | 342.1317 | 2355.331 | 18337.94 | 1020.388 | 10961.35 | 2897.544 | 8255.597 | 3704.893 | 16495.57 | 27778.45 | 606.3204 |
| M5_294154_S    | M5 | 294154 | 0  | 9851  | 677.3    | 2589.6   | 22483.8  | 2630.3   | 11915    | 3196.6   | 10555.6  | 4948.6   | 11088.4  | 16158.7  | 844.4    |
| M5_296361_S    | M5 | 296361 | 0  | 11425 | 249.7    | 1046     | 7867.8   | 2135.1   | 7698.8   | 983      | 7126.5   | 7472.7   | 15737.7  | 25872    | 574.6    |
| M5_DN_335640_S | M5 | 335640 | 26 | 18298 | 423.5873 | 3768.398 | 12373.06 | 3227.075 | 5063.762 | 4941.47  | 7450.782 | 1134.402 | 9347.085 | 22377.14 | 815.2957 |
| M5_DN_375182_S | M5 | 375182 | 0  | 18296 | 253.8706 | 1780.626 | 13035.47 | 3605.006 | 7238.687 | 2388.569 | 10316.28 | 4468.284 | 12421.56 | 23681.8  | 666.2891 |
| M5_380949_S    | M5 | 380949 | 0  | 9853  | 89.3     | 1082.8   | 8457     | 697.1    | 5083.2   | 1100.8   | 10904.4  | 5246.5   | 16195.8  | 18153.8  | 716      |
| M5_DN_410324_S | M5 | 410324 | 0  | 18154 | 312.1799 | 2456.731 | 7453.208 | 1861.197 | 4513.212 | 3102.446 | 6133.078 | 2127.972 | 8755.477 | 21586.43 | 247.9588 |
| M5_412761_S    | M5 | 412761 | 0  | 9839  | 289.9    | 1623.4   | 14399    | 1496     | 8758     | 1561.5   | 6598.4   | 4882.1   | 16474.4  | 19407.9  | 876.2    |
| M5_427366_S    | M5 | 427366 | 0  | 9835  | 718      | 1045.1   | 13797.8  | 1444.5   | 8065.3   | 1397.9   | 6831.3   | 5034     | 14374.2  | 19445.7  | 651      |
| M5_DN_452198_S | M5 | 452198 | 31 | 18301 | 247.5185 | 1648.682 | 11473.59 | 1697.835 | 6294.992 | 1721.108 | 8927.402 | 2001.283 | 11235.57 | 25171.95 | 607.4284 |
| M5_494454_S    | M5 | 494454 | 0  | 9852  | 287.4    | 1483.1   | 13097    | 2277.9   | 8175.7   | 1399.3   | 7379.8   | 5473.1   | 17556.7  | 17772.1  | 3515.8   |
| M5_DN_690397_S | M5 | 690397 | 0  | 18195 | 191.1506 | 1378.985 | 7965.666 | 1159.103 | 5336.522 | 1486.544 | 7477.875 | 1373.791 | 13461.38 | 32560.15 | 571.5416 |
| M5_DN_702808_S | M5 | 702808 | 37 | 18000 | 441.539  | 3283.912 | 16482.4  | 2517.911 | 10001.2  | 3496.929 | 8954.391 | 4320.867 | 18521.18 | 30560.23 | 999.1746 |
| M5_DN_717456_S | M5 | 717456 | 0  | 18196 | 178.7554 | 1363.237 | 5979.425 | 996.0701 | 6192.15  | 1550.214 | 7332.877 | 1834.602 | 13737.37 | 32889.96 | 371.7767 |
| M5_730817_S    | M5 | 730817 | 0  | 9840  | 600.6    | 1295.3   | 10948.5  | 1369.7   | 8447.5   | 1427.6   | 9195.4   | 5910.5   | 13204.5  | 21017.6  | 957.2    |
| M5_DN_737451_S | M5 | 737451 | 0  | 18199 | 138.0162 | 1269.403 | 5385.149 | 791.1404 | 7129.272 | 1286.417 | 7613.451 | 2766.162 | 15163.91 | 33942.66 | 459.2255 |



|                |      |        |    |       |          |          |          |          |          |          |          |          |          |          |          |
|----------------|------|--------|----|-------|----------|----------|----------|----------|----------|----------|----------|----------|----------|----------|----------|
| M5_775109_S    | M5   | 775109 | 39 | 9844  | 16.4     | 1301     | 13809.9  | 1719.9   | 6632.1   | 1339.9   | 8032.8   | 4001.4   | 11319.6  | 17557.4  | 527.3    |
| M5_DN_816067_S | M5   | 816067 | 41 | 18002 | 646.0905 | 3653.389 | 13056.93 | 2252.984 | 7605.384 | 5535.424 | 7423.851 | 2077.119 | 13390.77 | 33717.34 | 1300.471 |
| M5_DN_907786_S | M5   | 907786 | 45 | 18006 | 216.9161 | 2182.514 | 12456.41 | 1956.525 | 7032.574 | 2542.905 | 7716.207 | 3350.995 | 17191.1  | 29370.46 | 518.0335 |
| M5_DN_923966_S | M5   | 923966 | 0  | 18258 | 118.8627 | 1372.913 | 8228.831 | 1765.178 | 6864.093 | 1821.494 | 9736.23  | 3436.875 | 14403.4  | 22595.67 | 873.6022 |
| M5_957664_S    | M5   | 957664 | 0  | 9848  | 365.4    | 2102.3   | 9335.9   | 768.6    | 5404.4   | 1207.1   | 7157.2   | 1882.6   | 10905.5  | 15239.4  | 531.8    |
| M6_327929_S    | M6   | 327929 | 0  | 9862  | 834.1    | 3335     | 58509    | 4236.1   | 71085.1  | 3224.5   | 17297.1  | 8973.7   | 30204.3  | 27633.4  | 3028.1   |
| M6_569053_S    | M6   | 569053 | 0  | 9845  | 378.7    | 1407     | 12326    | 1395.9   | 10018.1  | 1333.2   | 11725.4  | 3654.1   | 16800.9  | 23463.5  | 654.5    |
| M6_884262_S    | M6   | 884262 | 0  | 9838  | 378.2    | 1044.2   | 9572.7   | 710.9    | 7087.5   | 814.2    | 9916.1   | 5568     | 19384.2  | 24223.6  | 468.5    |
| M7_530962_S    | M7   | 530962 | 0  | 11419 | 88.2     | 1283.3   | 10779.6  | 1527.9   | 9899.6   | 1155.7   | 9424.2   | 7932.9   | 17202.9  | 24127.8  | 307.7    |
| M7_938150_S    | M7   | 938150 | 0  | 9836  | 254      | 1277.1   | 15252.2  | 1690.3   | 8241.7   | 1053.7   | 10160.3  | 4879.8   | 15846.5  | 17264.8  | 547.7    |
| M7_986000_S    | M7   | 986000 | 0  | 9841  | 400.6    | 2394.3   | 14163.4  | 1114.5   | 9208.2   | 1108.7   | 9438.6   | 4250.2   | 16975.3  | 21798.3  | 115.8    |
| CD34_1 (1)     | CD34 |        |    |       | 499.4    | 754.5    | 4760.6   | 751      | 9014.9   | 453.9    | 12472.7  | 4120.2   | 15893.3  | 38322.3  | 393.8    |
| CD34_2 (1)     | CD34 |        |    |       | 323.8    | 942.7    | 6031.3   | 828.3    | 5561     | 942      | 14051.2  | 3484.6   | 19432.6  | 36194.6  | 1075.4   |
| cd34-3_13068_S | CD34 |        |    |       | 238      | 658.5    | 8647.4   | 1067.5   | 6816.8   | 345.4    | 7339.6   | 6498.5   | 16711    | 23954    | 896      |
| cd34-4_13234_S | CD34 |        |    |       | 813.8    | 1516.9   | 7859.6   | 2593.1   | 7340.6   | 254      | 9047     | 2867.2   | 14761.8  | 18789.1  | 1124     |
| cd34-5_13230_S | CD34 |        |    |       | 252.5    | 585.1    | 6528.5   | 555.4    | 6798.4   | 427.5    | 9650.3   | 4705.8   | 13110.2  | 17389.2  | 1188     |
| pros-5_13069_S | Pros |        |    |       | 356.1    | 830.7    | 15659.5  | 4389.4   | 4462     | 967.8    | 11281    | 4442.8   | 20537.5  | 25979.5  | 2338.2   |
| pros-6_13073_S | Pros |        |    |       | 295.3    | 893      | 12073.5  | 2524.5   | 6469.9   | 804.9    | 11339    | 10639    | 26650.9  | 33617.9  | 2240.8   |
| pros-7_13074_S | Pros |        |    |       | 440.2    | 1527.7   | 13122.7  | 3708.5   | 9798.6   | 747      | 13189.2  | 7944.8   | 25569.4  | 34576.9  | 1747.3   |
| pros-9_13233_S | Pros |        |    |       | 324.3    | 1093.3   | 13040.2  | 4859.9   | 7986.1   | 1328.9   | 10909.1  | 11146.7  | 26581.4  | 28439.1  | 3403     |
| pros-8_13232_S | Pros |        |    |       | 452.7    | 955.1    | 12869.5  | 6135.2   | 7634.6   | 759.1    | 11325.5  | 9322.1   | 19886.7  | 26337.6  | 3334.7   |
| Late_1 (1)     | PMNs |        |    |       | 254      | 3030.5   | 24989.7  | 2563     | 13261.5  | 2601.2   | 15347.2  | 13565    | 49676.7  | 46213.4  | 1437     |
| Late_2 (1)     | PMNs |        |    |       | 656.7    | 2678.2   | 27980.2  | 2092.9   | 15485.3  | 3262.7   | 19350.2  | 15733.3  | 43199.4  | 34932.3  | 1192.8   |
| pmns-5_13070_S | PMNs |        |    |       | 540.4    | 200.5    | 12150.5  | 3953.4   | 9170.7   | 1375     | 21316    | 4084.4   | 26432    | 44946.9  | 965.9    |
| pmns6_13075_S  | PMNs |        |    |       | 33.5     | 1398.8   | 10974.8  | 3014.9   | 8993.6   | 1337.3   | 21970    | 18702.7  | 20908.7  | 16904.3  | 2322.8   |
| pmns-7_13076_S | PMNs |        |    |       | 370.6    | 1820.1   | 16653.9  | 3562.9   | 9790.3   | 1342.3   | 22063.7  | 11100.1  | 31966.8  | 39744.6  | 1        |

**Supplementary Table 10.** Major clusters identified by Kernel Density Estimation (KDE) analysis in 7 primary tumor-relapse pairs.

| ID    | UPN    | Cluster  | Primary Tumor Variant Allele Frequency(%) | Relapse Variant Allele Frequency(%) | Normal Variant Allele Frequency(%) |
|-------|--------|----------|-------------------------------------------|-------------------------------------|------------------------------------|
| AML15 | 758168 | Cluster1 | 45.5*                                     | 44.8                                | 7.05                               |
| AML15 | 758168 | Cluster2 | 41.8*                                     | 26*                                 | -                                  |
| AML15 | 758168 | Cluster3 | 0                                         | 17                                  | -                                  |
| AML27 | 400220 | Cluster1 | 44.6                                      | 36.6                                | 7.05                               |
| AML27 | 400220 | Cluster2 | 0                                         | 13.3                                | -                                  |
| AML28 | 426980 | Cluster1 | 45.4                                      | 41.3                                | 1.37                               |
| AML28 | 426980 | Cluster2 | 45.4                                      | 11.5                                | -                                  |
| AML28 | 426980 | Cluster3 | 45.4                                      | 0                                   | -                                  |
| AML28 | 426980 | Cluster4 | 18.2                                      | 0                                   | -                                  |
| AML28 | 426980 | Cluster5 | 0                                         | 30.1                                | -                                  |
| AML31 | 452198 | Cluster1 | 45.4                                      | 18                                  | 20.4                               |
| AML31 | 452198 | Cluster2 | 36                                        | 0                                   | -                                  |
| AML31 | 452198 | Cluster3 | 11                                        | 0                                   | -                                  |
| AML31 | 452198 | Cluster4 | 0                                         | 18                                  | -                                  |
| AML35 | 573988 | Cluster1 | 41.7                                      | 14.3                                | 14.1                               |
| AML35 | 573988 | Cluster2 | 0                                         | 10.4                                | -                                  |
| AML40 | 804168 | Cluster1 | 45.2                                      | 39.3                                | 2.94                               |
| AML40 | 804168 | Cluster2 | 0                                         | 21.7                                | -                                  |
| AML43 | 869586 | Cluster1 | 45.4                                      | 20                                  | 1.17                               |
| AML43 | 869586 | Cluster2 | 23.3                                      | 0                                   | -                                  |
| AML43 | 869586 | Cluster3 | 16.4                                      | 20                                  | -                                  |
| AML43 | 869586 | Cluster4 | 0                                         | 20                                  | -                                  |

\* Clusters were identified with mcluster, dbSCAN was used to resolve allele frequencies between cluster 1 and 2 in AML15 UPN758168

**Supplementary Table 11.** 6 classes of transition and transversion events in primary tumor mutations and relapse-specific mutations from 8 AML cases.

| ID<br>Relapse UPN | AML1<br>933124 | AML15<br>758168 | AML27<br>400220 | AML28<br>426980 | AML31<br>452198 | AML35<br>573988 | AML40<br>804168 | AML43<br>869586 | Total |
|-------------------|----------------|-----------------|-----------------|-----------------|-----------------|-----------------|-----------------|-----------------|-------|
| A-->C             | 6              | 4               | 1               | 6               | 3               | 3               | 22              | 0               | 45    |
| A-->G             | 5              | 13              | 3               | 11              | 9               | 0               | 17              | 2               | 60    |
| A-->T             | 5              | 13              | 0               | 10              | 3               | 1               | 6               | 4               | 42    |
| C-->A             | 17             | 20              | 5               | 15              | 9               | 2               | 14              | 1               | 83    |
| C-->G             | 7              | 6               | 3               | 6               | 4               | 3               | 12              | 0               | 41    |
| C-->T             | 25             | 43              | 10              | 55              | 14              | 6               | 28              | 5               | 186   |

| ID<br>Tumor UPN | AML1<br>933124 | AML15<br>758168 | AML27<br>400220 | AML28<br>426980 | AML31<br>452198 | AML35<br>573988 | AML40<br>804168 | AML43<br>869586 | Total |
|-----------------|----------------|-----------------|-----------------|-----------------|-----------------|-----------------|-----------------|-----------------|-------|
| A-->C           | 16             | 24              | 11              | 38              | 4               | 5               | 23              | 37              | 158   |
| A-->G           | 66             | 69              | 34              | 128             | 12              | 35              | 94              | 129             | 567   |
| A-->T           | 19             | 40              | 14              | 58              | 6               | 9               | 42              | 92              | 280   |
| C-->A           | 40             | 47              | 47              | 77              | 8               | 11              | 76              | 161             | 467   |
| C-->G           | 24             | 26              | 12              | 48              | 5               | 5               | 28              | 48              | 196   |
| C-->T           | 157            | 166             | 150             | 391             | 40              | 68              | 260             | 690             | 1922  |

|                                               | Relapse        | Tumor            | p-value<br>(prop.test) |
|-----------------------------------------------|----------------|------------------|------------------------|
| A-->C                                         | 45/457         | 158/3590         | 9.13E-07               |
| A-->G                                         | 60/457         | 567/3590         | 0.1573                 |
| A-->T                                         | 42/457         | 280/3590         | 0.3456                 |
| C-->A                                         | 83/457         | 467/3590         | 0.003122               |
| C-->G                                         | 41/457         | 196/3590         | 0.003664               |
| C-->T                                         | 186/457        | 1922/3590        | 2.99E-07               |
| <b>Transversion/(Transversion+Transition)</b> | <b>211/457</b> | <b>1101/3590</b> | <b>3.71E-11</b>        |

**Supplementary Table 12.** Genes in transmembrane transport process (based on gene ontology analysis) harbor mutation(s) in at least one of the 8 cases.

| <b>GO Term</b>                                     | <b>Mutated Gene</b> | <b>Sample</b> | <b>TumorVarFreq</b> | <b>RelapseVarFreq</b> | <b>Classification</b> | <b>Amino Acid Change</b> |
|----------------------------------------------------|---------------------|---------------|---------------------|-----------------------|-----------------------|--------------------------|
| <b>GO:0055085:<br/>transmembrane<br/>transport</b> | <i>ABCB11</i>       | 869586        | 46.97%              | 21.84%                | shared                | p.A1283V                 |
|                                                    | <i>GABRR1</i>       | 869586        | 46.47%              | 18.86%                | shared                | p.A286T                  |
|                                                    | <i>KCNQ2</i>        | 426980        | 46.99%              | 12.68%                | shared                | e15+1                    |
|                                                    | <i>SLC15A1</i>      | 933124        | 51.50%              | 45.90%                | shared                | p.W77*                   |
|                                                    | <i>SLC25A12</i>     | 804168        | 0.00%               | 23.52%                | relapse-specific      | p.R603W                  |
|                                                    | <i>SLC30A6</i>      | 758168        | 49.43%              | 42.66%                | shared                | p.H356R                  |
|                                                    | <i>TPTE2</i>        | 758168        | 43.65%              | 49.10%                | shared                | p.E339K                  |

## Supplementary References

- 1 Mardis, E. R. *et al.* Recurring mutations found by sequencing an acute myeloid leukemia genome. *N Engl J Med* **361**, 1058-1066, doi:NEJMoa0903840 [pii]10.1056/NEJMoa0903840 (2009).
- 2 Li, H. & Durbin, R. Fast and accurate short read alignment with Burrows-Wheeler transform. *Bioinformatics* **25**, 1754-1760, doi:10.1093/bioinformatics/btp324 (2009).
- 3 Li, H. *et al.* The Sequence Alignment/Map format and SAMtools. *Bioinformatics* **25**, 2078-2079, doi:btp352 [pii]10.1093/bioinformatics/btp352 (2009).
- 4 Ding, L. *et al.* Genome remodelling in a basal-like breast cancer metastasis and xenograft. *Nature* **464**, 999-1005, doi:nature08989 [pii]10.1038/nature08989.
- 5 Ye, K., Schulz, M. H., Long, Q., Apweiler, R. & Ning, Z. Pindel: a pattern growth approach to detect break points of large deletions and medium sized insertions from paired-end short reads. *Bioinformatics* **25**, 2865-2871, doi:btp394 [pii]10.1093/bioinformatics/btp394 (2009).
- 6 McKenna, A. *et al.* The Genome Analysis Toolkit: a MapReduce framework for analyzing next-generation DNA sequencing data. *Genome Res* **20**, 1297-1303, doi:10.1101/gr.107524.110 (2010).
- 7 Chen, K. *et al.* BreakDancer: an algorithm for high-resolution mapping of genomic structural variation. *Nat Methods* **6**, 677-681, doi:nmeth.1363 [pii]10.1038/nmeth.1363 (2009).
- 8 Ley, T. J. *et al.* DNA sequencing of a cytogenetically normal acute myeloid leukaemia genome. *Nature* **456**, 66-72, doi:nature07485 [pii]10.1038/nature07485 (2008).
- 9 Yanaihara, N. *et al.* Reduced expression of MYO18B, a candidate tumor-suppressor gene on chromosome arm 22q, in ovarian cancer. *Int J Cancer* **112**, 150-154, doi:10.1002/ijc.20339 (2004).
- 10 Nishioka, M. *et al.* MYO18B, a candidate tumor suppressor gene at chromosome 22q12.1, deleted, mutated, and methylated in human lung cancer. *Proc Natl Acad Sci U S A* **99**, 12269-12274, doi:10.1073/pnas.192445899 (2002).
- 11 Dan, I., Watanabe, N. M. & Kusumi, A. The Ste20 group kinases as regulators of MAP kinase cascades. *Trends Cell Biol* **11**, 220-230, doi:S0962-8924(01)01980-8 [pii] (2001).
- 12 Hirano, T. The ABCs of SMC proteins: two-armed ATPases for chromosome condensation, cohesion, and repair. *Genes Dev* **16**, 399-414, doi:10.1101/gad.955102 (2002).
- 13 Lewis, P. W., Elsaesser, S. J., Noh, K. M., Stadler, S. C. & Allis, C. D. Daxx is an H3.3-specific histone chaperone and cooperates with ATRX in replication-independent chromatin assembly at telomeres. *Proc Natl Acad Sci U S A* **107**, 14075-14080, doi:10.1073/pnas.1008850107 (2010).
- 14 Schmid, M. & Jensen, T. H. The exosome: a multipurpose RNA-decay machine. *Trends Biochem Sci* **33**, 501-510, doi:10.1016/j.tibs.2008.07.003 (2008).
- 15 Chapman, M. A. *et al.* Initial genome sequencing and analysis of multiple myeloma. *Nature* **471**, 467-472, doi:10.1038/nature09837 (2011).
- 16 Barjesteh van Waalwijk van Doorn-Khosrovani, S. *et al.* Somatic heterozygous mutations in ETV6 (TEL) and frequent absence of ETV6 protein in acute myeloid leukemia. *Oncogene* **24**, 4129-4137, doi:10.1038/sj.onc.1208588 (2005).
- 17 Walter, M. J. *et al.* Acquired copy number alterations in adult acute myeloid leukemia genomes. *Proc Natl Acad Sci U S A* **106**, 12950-12955, doi:10.1073/pnas.0903091106 (2009).
- 18 Griffith, O. L. *et al.* ORegAnno: an open-access community-driven resource for regulatory annotation. *Nucleic Acids Res* **36**, D107-113, doi:10.1093/nar/gkm967 (2008).
- 19 King, D. C. *et al.* Evaluation of regulatory potential and conservation scores for detecting cis-regulatory modules in aligned mammalian genome sequences. *Genome Res* **15**, 1051-1060, doi:10.1101/gr.3642605 (2005).
- 20 Kolbe, D. *et al.* Regulatory potential scores from genome-wide three-way alignments of human, mouse, and rat. *Genome Res* **14**, 700-707, doi:10.1101/gr.1976004 (2004).
- 21 Kircher, M., Stenzel, U. & Kelso, J. Improved base calling for the Illumina Genome Analyzer using machine learning strategies. *Genome Biol* **10**, R83, doi:10.1186/gb-2009-10-8-r83 (2009).
- 22 Shendure, J. & Ji, H. Next-generation DNA sequencing. *Nat Biotechnol* **26**, 1135-1145, doi:10.1038/nbt1486 (2008).
- 23 Zhang, B., Kirov, S. & Snoddy, J. WebGestalt: an integrated system for exploring gene sets in various biological contexts. *Nucleic Acids Res* **33**, W741-748, doi:10.1093/nar/gki475 (2005).

- 24 Carmona-Saez, P., Chagoyen, M., Tirado, F., Carazo, J. M. & Pascual-Montano, A. GENECODIS: a web-based tool for finding significant concurrent annotations in gene lists. *Genome Biol* **8**, R3, doi:10.1186/gb-2007-8-1-r3 (2007).
- 25 Cai, J. *et al.* Two distinct molecular mechanisms underlying cytarabine resistance in human leukemic cells. *Cancer Res* **68**, 2349-2357, doi:10.1158/0008-5472.CAN-07-5528 (2008).
